# Supplementary material for: Spatial heterogeneity of viral communities across the gastrointestinal tracts of ruminants
Source: Research Square preprint supplement (doi:10.21203/rs.3.rs-4244627/v1), 2024-04-10
Supplement: Supplementary file 1 [file 15f38c6847b627840bedb0f7.xlsx]

## Sheet: Table S26
Table S26. RPKM values of GHs derived from viruses and hosts in the GIT of ruminants
GH Family	AMG Category	Substrate	Virus										Host Class	Host
			Rum	Ret	Oma	Abo	Duo	Jej	Ile	Cec	Col	Rec		Rum	Ret	Oma	Abo	Duo	Jej	Ile	Cec	Col	Rec
GH3	I	Cellulose	0.0126985	0.0111257	0.0133401	0.013102	0.00874143	0.00232775	0.0270905	0.692762	0.61376	0.664288	Clostridia	0.0942216	0.131332	0.217326	0.109247	0.104015	0.241929	0.00328993	6.25182	6.56877	7.55828
GH94	II	Cellulose	0.729083	0.58923	0.580774	2.27293	1.58205	0.155297	0.129465	0.0391937	0.0119967	0.014543	Clostridia	0.216911	0.264849	0.278865	0.760322	0.582949	0	0.0120908	0.0031641	0.00309623	0
GH2	I	Hemicellulose	0.425816	0.519594	0.548287	0.336072	0.181271	0.184859	0.158098	0.755169	0.331877	0.264739	Multiple	11.4302	11.3105	12.835	10.2162	4.18109	0.535097	3.75849	4.02749	2.86111	3.44289
GH10	I	Hemicellulose	0.466448	2.34356	0.612419	2.15779	2.64865	4.01084	8.64595	0.932807	0.305834	0.707841	Multiple	0	0	0	0	0	0	0	0	0	0
GH26	I	Hemicellulose	0.0179243	0.017751	0.0310433	0.0157809	0.0135821	0.00194	0.00716654	1.37296	0.976608	1.02011	Clostridia	0	0	0	0	0	0	0	0	0	0
GH43	II	Hemicellulose	0.00202131	0.00215945	0.00128065	0.00152519	0.0601075	0.0114501	0.185706	1.61194	1.58449	1.6873	Multiple	0.0257724	0	0	0	0	0.0900814	0	11.6608	11.8128	11.2497
GH51	I	Hemicellulose	0.01909	0.0158491	0.0278917	0.0254695	0.0315653	0.0348794	0.0300363	0.110791	0.118148	0.147645	Clostridia	0.391514	0.311236	0.481903	0.647383	0.389591	0.0030087	0.198269	0.0482068	0.00446886	0.00744134
GH115	II	Hemicellulose	0.786003	0.820874	0.393844	0.537673	0.243125	0.00912618	0.032998	0.0308684	0.00147077	0.00180676	Bacteroidia	0.106446	0.105667	0.0671522	0.0725255	0	0	0	0.00491667	0	0
GH4	I	Host Glycans	0.0193865	0.0161015	0.028066	0.0257789	0.0422144	0.0349829	0.0353536	0.277354	0.294617	0.338948	Clostridia	0.20345	0.158015	0.253432	0.296813	0.30668	0.0030087	0.198269	0.231783	0.182239	0.212498
GH29	I	Host Glycans	1.12428	1.32122	1.27071	1.17022	0.576765	0.671853	0.387428	0.332061	0.00346981	0.00420566	Bacteroidia	0.314886	0.300368	0.225348	0.340816	0.0343153	0.0109311	0.0138219	0.00612581	0	0
GH28	II	Pectin	0.0357302	0.0355652	0.0574458	0.0354712	0.0527672	0.0117893	0.0283555	1.96572	1.58145	1.83194	Clostridia	0.00274482	0	0	0	0	0	0	0.680427	0.713041	0.794368
GH53	I	Pectin	3.27501	3.1444	2.47507	3.19525	0.95046	0.286986	0.247386	0.382099	0.375881	0.379504	Bacteroidia	2.48595	2.90011	2.33012	2.78822	0.913571	5.61566	0.0535493	0.00558377	0.00656148	0.00524458
GH105	I	Pectin	0.000910845	0.00426314	0.00127592	0.0013431	0.00109872	0.00514037	0.00226537	0.000218438	0.000373232	0.0010145	Bacteroidia	0	0	0	0	0	0	0	0	0	0
GH33	II	Sialic Acid	0.00317002	0.00342501	0.00412886	0.0020733	0.00111046	0.000464778	0.00593082	0.236149	0.219542	0.209633	Clostridia	0.0532535	0.0331052	0.0642354	0.0239604	0	0.00256065	0	0	0	0
GH13	I	Starch	0.149186	0.157706	0.207921	0.451723	0.574023	0.594356	0.711844	1.94216	1.84653	1.82761	Clostridia	1.54533	1.07319	1.82492	1.20346	3.65615	3.88294	0.981049	8.00587	7.94544	8.39625
GH77	I	Starch	0.00783269	0.00807262	0.00787667	0.00868216	0.0169917	0.000486541	0.00749328	0.126411	0.126656	0.16636	Clostridia	0.117189	0.104872	0.148322	0.191132	0.0915608	0	0.00109664	0.177366	0.178744	0.206801
GH16	II	Others	0.538329	0.651212	0.433121	0.531607	0.110758	0.0959516	0.0814089	0.0160256	0.038588	0.0140534	Multiple	0.295656	0.103458	0.0321839	0.0525498	3.4516e-05	0.95209	0	0.00631411	0	0
GH35	I	Others	0.790698	0.918097	0.52935	0.683089	0.0912968	0.113459	0.338663	0.260777	0.00435726	0.00647306	Bacteroidia	0.789229	0.775218	0.495676	0.603179	0.0574309	0.0114554	0	0.0110534	0	0
GH36	I	Others	0.000204626	0.000206584	0.000302259	0.000168139	0.0313714	0.000424772	0.012787	0.745093	0.597989	0.290572	Clostridia	0	0	0	0	0	0	0	0.786768	0.630745	0.37895
GH109	II	Others	0.00790767	0.00644027	0.00978873	0.00730905	0.02403	0.00691629	0.0388689	1.42109	1.26584	1.22408	Clostridia	0.10129	0.062855	0.118359	0.0774621	0.776037	11.5257	0.803623	0.453737	0.414274	0.510228
GH110	II	Others	0.0179243	0.017751	0.0310433	0.0157809	0.0135821	0.00194	0.00716654	1.37296	0.976608	1.02011	Clostridia	0	0	0	0	0	0	0	0	0	0
GH113	II	Others	1.54216	1.41151	4.2015	2.21162	6.28951	5.26616	3.77577	3.74474	1.92464	2.38896	Multiple	0.0819089	0.296206	0.133837	0.357977	0.179361	0.0446622	0.00707527	0.16947	0.190732	0.196913
GH165	II	Others	0.0086529	0.00975777	0.00408812	0.00799644	0.0131549	0.0156169	0.014859	0.730457	0.380336	0.308473	Lentisphaeria	0	0	0	0	0	0	0	0	0	0
Rum: rumen; Ret: reticulum; Oma: omasum; Abo: abomasum; Duo: duodenum; Jej: jejunum; Ile: ileum; Cec: cecum; Col: colon; Rec: rectum
References for GH substrates
1. Solden, L.M., Naas, A.E., Roux, S. et al. Interspecies cross-feeding orchestrates carbon degradation in the rumen ecosystem. Nat Microbiol 3, 1274–1284 (2018).
2. Lin, L., Lai, Z., Zhang, J. et al. The gastrointestinal microbiome in dairy cattle is constrained by the deterministic driver of the region and the modified effect of diet. Microbiome 11, 10 (2023).
3. Nuccio, E.E., Starr, E., Karaoz, U. et al. Niche differentiation is spatially and temporally regulated in the rhizosphere. ISME J 14, 999–1014 (2020).
4. Seshadri, R., Leahy, S., Attwood, G. et al. Cultivation and sequencing of rumen microbiome members from the Hungate1000 Collection. Nat Biotechnol 36, 359–367 (2018).
5. Flint, H., Bayer, E., Rincon, M. et al. Polysaccharide utilization by gut bacteria: potential for new insights from genomic analysis. Nat Rev Microbiol 6, 121–131 (2008).
6. Kaoutari, A., Armougom, F., Gordon, J. et al. The abundance and variety of carbohydrate-active enzymes in the human gut microbiota. Nat Rev Microbiol 11, 497–504 (2013).
