# Supplementary material for: Spatial heterogeneity of viral communities across the gastrointestinal tracts of ruminants
Source: Research Square preprint supplement (doi:10.21203/rs.3.rs-4244627/v1), 2024-04-10
Supplement: Supplementary file 2 [file 1ef2bc5edb2b8b390b62f25d.xlsx]

## Sheet: Table S7
Table S7. List of 3,764 viral clusters (VCs)
VC_Num	Size	Density	Internal weight	External weight	Quality	P-value	Members
VC1	48	128.1	145000	641000	0.1841	0.300165	2022NBT-128 2022NBT-1476 2022NBT-1866 2022NBT-2413 2022NBT-276 2022NBT-3013 2022NBT-347 2022NBT-418 2022NBT-466 2022NBT-668 2022NBT-862 2022NBT-942 Goat_Colon-2__c306 Goat_Omasum-5__c59142 Roe_deer_Rectum-4__c470 Water_buffalos_Abomasum-5__c1059877 Water_deer_Rectum-2__c574790 Water_deer_Reticulum-5__c248 contig_12081 flye-goat_13463 2022NBT-10695 2022NBT-2664 2022NBT-3733 2022NBT-5614 Goat_Omasu…
VC2	35	275.1	164000	1220000	0.1182	1	2022NBT-1 2022NBT-1048 2022NBT-112 2022NBT-1192 2022NBT-1257 2022NBT-1278 2022NBT-1518 2022NBT-1674 2022NBT-186 2022NBT-188 2022NBT-1929 2022NBT-219 2022NBT-2809 2022NBT-294 2022NBT-3326 2022NBT-434 2022NBT-4496 2022NBT-5293 2022NBT-656 2022NBT-697 2022NBT-760 2022NBT-838 2022NBT-9 Goat_Cecum-3__c249158 Goat_Reticulum-2__c870 Roe_deer_Cecum-1__c632 Sheep_Rectum-1__c1181 flye-dairy_20538 flye-goat…
VC3	145	263.5	2750000	3420000	0.446	0	2022NBT-1 2022NBT-10064 2022NBT-1048 2022NBT-1050 2022NBT-1066 2022NBT-112 2022NBT-1149 2022NBT-1151 2022NBT-1171 2022NBT-1192 2022NBT-1202 2022NBT-1278 2022NBT-1357 2022NBT-1368 2022NBT-1379 2022NBT-14 2022NBT-1404 2022NBT-1425 2022NBT-1434 2022NBT-1493 2022NBT-1584 2022NBT-1607 2022NBT-170 2022NBT-1727 2022NBT-188 2022NBT-1926 2022NBT-1971 2022NBT-2141 2022NBT-2224 2022NBT-2238 2022NBT-2242 202…
VC4	27	43.74	15400	45200	0.2531	0.824899	Goat_Colon-1__c364372 Sheep_Colon-3__c507 Sheep_Rectum-4__c475125 Roe_deer_Rectum-2__c117044 Sheep_Colon-2__c656122 Sheep_Rectum-5__c352841 Roe_deer_Colon-5__c264934 Sheep_Colon-2__c450381 2022NBT-29536 Roe_deer_Cecum-4__c55 Goat_Colon-6__c105277 Roe_deer_Cecum-1__c251974 Roe_deer_Cecum-1__c545619 Roe_deer_Cecum-2__c1492 Roe_deer_Cecum-2__c2374 Roe_deer_Cecum-2__c301193 Roe_deer_Cecum-2__c319 Roe…
VC5	49	450.2	529000	1130000	0.3192	0.545256	2022NBT-1011 2022NBT-1021 2022NBT-1074 2022NBT-13 2022NBT-148 2022NBT-151 2022NBT-173 2022NBT-1876 2022NBT-225 2022NBT-255 2022NBT-269 2022NBT-2873 2022NBT-320 2022NBT-33 2022NBT-389 2022NBT-39 2022NBT-405 2022NBT-408 2022NBT-474 2022NBT-545 2022NBT-5985 2022NBT-605 2022NBT-608 2022NBT-63 2022NBT-754 2022NBT-844 2022NBT-916 Roe_deer_Cecum-1__c343 Roe_deer_Reticulum-3__c188924 Sheep_Rumen-5__c1596…
VC6	7	174	3654	24700	0.1288	0.899332	2022NBT-1013 2022NBT-1119 2022NBT-2274 2022NBT-3455 Yak_Duodenum-3__c107 flye-dairy_64570 flye-dairy_78344
VC7	113	274.6	1740000	1910000	0.4758	0	2022NBT-1011 2022NBT-1021 2022NBT-1047 2022NBT-1074 2022NBT-1121 2022NBT-1185 2022NBT-1195 2022NBT-1282 2022NBT-13 2022NBT-1352 2022NBT-1373 2022NBT-148 2022NBT-151 2022NBT-154 2022NBT-1547 2022NBT-1572 2022NBT-1577 2022NBT-1659 2022NBT-173 2022NBT-1777 2022NBT-1788 2022NBT-1847 2022NBT-1903 2022NBT-1996 2022NBT-20 2022NBT-225 2022NBT-2360 2022NBT-2405 2022NBT-2467_1 2022NBT-255 2022NBT-260 2022N…
VC8	28	11.24	4247	11400	0.27	0.818449	Sheep_Colon-4__c88631 Roe_deer_Cecum-2__c1518 Roe_deer_Rectum-2__c179413 2022NBT-35957 2022NBT-118909 2022NBT-155747 Dairy_cattle_Cecum-2__c150207 Roe_deer_Cecum-4__c297249 Roe_deer_Colon-4__c63360 Roe_deer_Rectum-2__c301239 Sheep_Cecum-4__c476472 Sheep_Colon-1__c8274 Sheep_Colon-2__c759368 Sheep_Colon-3__c946507 Sheep_Rectum-3__c406039 Sheep_Rectum-4__c299270 Water_buffalos_Cecum-4__c292966 Wate…
VC9	6	270.7	4061	77400	0.04982	0.998474	2022NBT-4818 2022NBT-5533 Goat_Rectum-3__c206 2022NBT-14967 Goat_Cecum-5__c1105 2022NBT-7207
VC10	15	120.2	12600	42500	0.2289	0.988734	Sheep_Rectum-3__c337 Sheep_Rectum-4__c87685 s9295.goat-hifiasm009456l 2022NBT-16243 2022NBT-19349 Goat_Cecum-1__c257673 Water_deer_Colon-1__c235596 2022NBT-22314 2022NBT-17733 2022NBT-29938 Roe_deer_Rectum-5__c478 Water_buffalos_Reticulum-1__c469351 2022NBT-17337 2022NBT-34404 Water_deer_Cecum-2__c218
VC11	19	55.04	9411	15200	0.3823	0.039914	2022NBT-54636 2022NBT-56439 Dairy_cattle_Cecum-4__c512 Dairy_cattle_Colon-3__c40799 Roe_deer_Rectum-2__c2045 Water_buffalos_Rectum-2__c305893 Water_buffalos_Rumen-1__c503805_1 Water_deer_Cecum-2__c569486 Water_deer_Rectum-1__c217492 Water_deer_Rectum-1__c333425 Water_deer_Rectum-3__c573098 Yak_Cecum-3__c718884 Yak_Colon-4__c72786 flye-dairy_58516 2022NBT-3214_1 Dairy_cattle_Colon-4__c598583 Dairy…
VC12	5	465.1	4651	82700	0.05324	0.996692	flye-goat_16445 2022NBT-3185 2022NBT-4807 2022NBT-6727 contig_25799
VC13	50	211.7	259000	1140000	0.1849	1	2022NBT-1035 2022NBT-1042 2022NBT-1096 2022NBT-1175 2022NBT-1342 2022NBT-1579 2022NBT-162 2022NBT-1622 2022NBT-177 2022NBT-1832 2022NBT-187 2022NBT-2218 2022NBT-2401 2022NBT-248 2022NBT-283 2022NBT-2853 2022NBT-2883 2022NBT-305 2022NBT-396 2022NBT-40 2022NBT-4017 2022NBT-4077 2022NBT-4308 2022NBT-435 2022NBT-60 2022NBT-600 2022NBT-6326 2022NBT-74 2022NBT-77 2022NBT-862 flye-goat_328 s31.goat-hifi…
VC14	2	600	600	14200	0.0406	0.979387	Sheep_Rectum-3__c1115131 Sheep_Colon-3__c526839
VC15	2	439.6	439.6	9124	0.04594	0.979387	2022NBT-23875 2022NBT-33679
VC16	193	122.7	2270000	5920000	0.2775	1	2022NBT-1039 2022NBT-1053 2022NBT-106 2022NBT-1067 2022NBT-1094 2022NBT-1144 2022NBT-117 2022NBT-1200 2022NBT-1209 2022NBT-133 2022NBT-1390 2022NBT-1393 2022NBT-1396 2022NBT-141 2022NBT-1413 2022NBT-1447 2022NBT-1462 2022NBT-1498 2022NBT-152 2022NBT-1609 2022NBT-1613 2022NBT-1642 2022NBT-165 2022NBT-1650 2022NBT-1660 2022NBT-1692 2022NBT-1709 2022NBT-172 2022NBT-1755 2022NBT-1766 2022NBT-1823 202…
VC17	13	62.01	4837	81400	0.0561	0.999987	2022NBT-1944 2022NBT-12716 2022NBT-13667 2022NBT-14204 2022NBT-5736 Roe_deer_Rectum-4__c1487 Sheep_Rumen-4__c232052 Water_deer_Colon-1__c207602 Water_deer_Rectum-4__c38853 flye-goat_4847 s6676.dairy-hifiasm006677l 2022NBT-27218 2022NBT-30903
VC18	3	336.2	1009	30000	0.03254	0.985452	2022NBT-14067 2022NBT-49569 2022NBT-9269
VC19	31	60.69	28200	99000	0.2217	0.999987	2022NBT-19177 Goat_Cecum-1__c104238 Goat_Ileum-2__c215462 Goat_Omasum-6__c222462 Roe_deer_Rumen-5__c154564 2022NBT-17632 2022NBT-31056 Goat_Ileum-3__c116414 Sheep_Ileum-1__c217860 Water_deer_Rectum-1__c38 2022NBT-29611 2022NBT-36933 2022NBT-37540 2022NBT-39935 2022NBT-48439 2022NBT-61787 Roe_deer_Cecum-4__c141 Roe_deer_Cecum-5__c476913 Sheep_Jejunum-5__c131652 Sheep_Rumen-5__c203127 Water_deer_Ce…
VC20	32	35.67	17700	37300	0.3214	0.486611	2022NBT-42185_1 Dairy_cattle_Rectum-1__c548254 s3808.goat-hifiasm003909l 2022NBT-32392_1 Goat_Colon-1__c845789 Goat_Ileum-4__c87047_1 Goat_Jejunum-2__c430 Roe_deer_Omasum-1__c459_1 Sheep_Omasum-5__c144360 Water_buffalos_Rumen-1__c126164_1 Water_deer_Cecum-2__c97486 Water_deer_Rectum-1__c357289 Water_deer_Rumen-1__c347758 Yak_Rumen-1__c1017918 contig_157101 flye-dairy_61930_1 flye-dairy_78005 flye…
VC21	21	10.36	2175	3478	0.3819	0.0413044	Roe_deer_Cecum-4__c418291 Sheep_Colon-3__c497850 2022NBT-111741 Goat_Colon-2__c134854 Roe_deer_Cecum-1__c345359 Sheep_Rectum-4__c464837 2022NBT-124538 2022NBT-142929 Dairy_cattle_Colon-5__c114514 Roe_deer_Colon-1__c841745 Roe_deer_Colon-4__c3630_1 Sheep_Rectum-3__c438516 Water_buffalos_Rectum-5__c189453 Water_deer_Colon-4__c139983 Water_deer_Rectum-5__c84171 Goat_Rectum-3__c135631 Roe_deer_Cecum-…
VC22	182	132.1	2180000	4890000	0.3077	0.921201	2022NBT-1032 2022NBT-1040 2022NBT-1076 2022NBT-1079 2022NBT-1169 2022NBT-1187 2022NBT-1220 2022NBT-1267 2022NBT-1292 2022NBT-1298 2022NBT-1335 2022NBT-1338 2022NBT-1350 2022NBT-1356 2022NBT-1384 2022NBT-150 2022NBT-1540 2022NBT-1558 2022NBT-1593 2022NBT-1594 2022NBT-161 2022NBT-1649 2022NBT-1726 2022NBT-1797 2022NBT-1850 2022NBT-1911 2022NBT-2002 2022NBT-2061 2022NBT-21 2022NBT-2109 2022NBT-2152 …
VC23	60	150.8	267000	2040000	0.1159	1	2022NBT-1094 2022NBT-1144 2022NBT-1200 2022NBT-1396 2022NBT-1413 2022NBT-1447 2022NBT-1498 2022NBT-1650 2022NBT-1789 2022NBT-1871 2022NBT-1877 2022NBT-2312 2022NBT-2337 2022NBT-2394 2022NBT-2451 2022NBT-2481 2022NBT-2500 2022NBT-2604 2022NBT-2783 2022NBT-2815 2022NBT-332 2022NBT-3447 2022NBT-3732 2022NBT-4119 2022NBT-417 2022NBT-437 2022NBT-44 2022NBT-5049 2022NBT-5302 2022NBT-5324 2022NBT-538 20…
VC24	70	142.4	344000	1970000	0.1487	1	2022NBT-104 2022NBT-1099 2022NBT-1104 2022NBT-1152 2022NBT-1162 2022NBT-1189 2022NBT-1197 2022NBT-1199 2022NBT-1246 2022NBT-1255 2022NBT-1309 2022NBT-1364 2022NBT-1385 2022NBT-147 2022NBT-1571 2022NBT-1696 2022NBT-1722 2022NBT-1854 2022NBT-1885 2022NBT-202 2022NBT-2024 2022NBT-205 2022NBT-2058 2022NBT-211 2022NBT-2133 2022NBT-2227 2022NBT-2369 2022NBT-279 2022NBT-2992 2022NBT-3010 2022NBT-3049 20…
VC25	4	434.4	2606	16900	0.1335	0.992931	2022NBT-6656 2022NBT-14641 2022NBT-15977 2022NBT-27648
VC26	11	173.3	9533	88800	0.09689	0.999969	2022NBT-18885 2022NBT-29085 2022NBT-4975 Roe_deer_Cecum-2__c1339 Roe_deer_Rectum-3__c145692 Water_deer_Reticulum-2__c19711 Dairy_cattle_Cecum-5__c884027 Sheep_Duodenum-4__c167 2022NBT-55861 Sheep_Reticulum-1__c136050 Water_buffalos_Cecum-4__c672845
VC27	4	298.5	1791	56900	0.03051	0.992931	2022NBT-5455 2022NBT-7114 Water_buffalos_Reticulum-3__c709869 Water_deer_Rectum-4__c108021
VC28	10	33.75	1519	2274	0.3983	0.0320111	2022NBT-21942 2022NBT-11574_1 2022NBT-32741 2022NBT-43949 2022NBT-60250 2022NBT-69002 Roe_deer_Cecum-1__c238593 2022NBT-20925_1 2022NBT-22028_1 2022NBT-68033
VC29	3	277.1	831.4	13300	0.05887	0.985452	2022NBT-6591 Goat_Cecum-1__c517392 Roe_deer_Cecum-4__c246
VC30	37	286.6	191000	605000	0.2399	0.963641	2022NBT-1296 2022NBT-1781 2022NBT-218 2022NBT-2499 2022NBT-2841 2022NBT-306 2022NBT-3211 2022NBT-3343 2022NBT-439 2022NBT-527 2022NBT-5593 2022NBT-594 2022NBT-5955 2022NBT-8076 2022NBT-829 Goat_Omasum-1__c69148 Goat_Omasum-1__c8086 Goat_Rectum-3__c179 Sheep_Jejunum-2__c755 Sheep_Rectum-1__c1159 Sheep_Rectum-1__c841635 Sheep_Reticulum-1__c34724 Water_buffalos_Rumen-1__c521554 Water_deer_Cecum-2__c…
VC31	13	12.52	976.7	1424	0.4024	0.0619679	2022NBT-70232 2022NBT-51146_1 2022NBT-56169 Sheep_Rectum-3__c430274_1 Yak_Rectum-3__c662985 2022NBT-16768_1 Dairy_cattle_Rectum-4__c313436 2022NBT-70518 2022NBT-38011_1 2022NBT-73017 2022NBT-69201 Goat_Rectum-5__c204857_1 Dairy_cattle_Cecum-2__c1010982
VC32	12	95.84	6326	6726	0.4838	1.83e-05	Water_buffalos_Colon-4__c55221 2022NBT-56281 Dairy_cattle_Rectum-3__c845502 Goat_Colon-2__c397106_1 Goat_Rectum-1__c207445 Roe_deer_Rectum-3__c2182 Water_buffalos_Colon-2__c188522 Water_buffalos_Rectum-4__c257020 Water_buffalos_Rectum-5__c54707 Water_deer_Cecum-2__c483633 Water_deer_Rectum-1__c370857 Water_deer_Rectum-3__c161513
VC33	7	20.88	438.5	2638	0.1419	0.997531	2022NBT-13613_1 2022NBT-1080_1 2022NBT-24228 2022NBT-54897 2022NBT-54940_1 Goat_Rectum-5__c432068_1 Water_buffalos_Rumen-1__c86321_1
VC34	3	440.4	1321	2696	0.3284	0.808633	2022NBT-19649 2022NBT-20173 2022NBT-21570
VC35	33	29.03	15300	5427	0.7362	0	2022NBT-21762_1 2022NBT-2973_1 2022NBT-58056_1 2022NBT-62290 2022NBT-73758 2022NBT-82771 2022NBT-87365 2022NBT-90460_1 Dairy_cattle_Cecum-2__c750472 Dairy_cattle_Duodenum-3__c2746 Dairy_cattle_Jejunum-2__c940944 Dairy_cattle_Jejunum-6__c227182 Roe_deer_Cecum-2__c1028 Roe_deer_Cecum-2__c163111 Roe_deer_Cecum-2__c326047_1 Roe_deer_Cecum-2__c429415 Roe_deer_Cecum-3__c2395_1 Roe_deer_Cecum-5__c2546 R…
VC36	31	75.69	35200	96500	0.2671	0.866975	Roe_deer_Cecum-4__c1619 Sheep_Cecum-4__c378524 Water_buffalos_Rectum-1__c58988 Water_deer_Colon-5__c363 Roe_deer_Cecum-2__c575 2022NBT-42647 Goat_Colon-2__c240421 Goat_Colon-3__c535638 Roe_deer_Cecum-5__c967 Sheep_Cecum-1__c387193 Water_buffalos_Cecum-4__c767645 2022NBT-36722 2022NBT-41128 Goat_Cecum-3__c901107 Roe_deer_Cecum-5__c198000 Sheep_Cecum-1__c219561 Sheep_Colon-4__c263 Roe_deer_Colon-3_…
VC37	10	216.6	9745	82700	0.1054	0.999709	Roe_deer_Duodenum-2__c141 Roe_deer_Rectum-4__c470 Water_buffalos_Abomasum-5__c1059877 Water_deer_Rectum-2__c574790 Goat_Omasum-1__c178764 Goat_Rectum-3__c522 Goat_Rumen-1__c746312 Roe_deer_Rectum-5__c548572 Roe_deer_Rumen-3__c329693 Water_deer_Abomasum-2__c160995
VC38	9	38.22	1376	13400	0.09277	0.999853	2022NBT-35549 2022NBT-35759 2022NBT-49585 Goat_Cecum-1__c1418 Roe_deer_Cecum-2__c102745 Sheep_Rumen-5__c992749 Water_buffalos_Colon-1__c890212 Water_deer_Abomasum-5__c91822 s2233.dairy-hifiasm002234l
VC39	6	132.7	1991	15000	0.117	0.998474	2022NBT-37540 Water_deer_Colon-2__c49052 Water_deer_Cecum-3__c211596 s10561.goat-hifiasm010736l Roe_deer_Rumen-1__c8939 Water_deer_Cecum-2__c430249
VC40	45	52.62	52100	41500	0.556	0	2022NBT-74290 Roe_deer_Cecum-4__c150036 2022NBT-13323_1 2022NBT-1717_1 2022NBT-58639 2022NBT-64327 2022NBT-64820 2022NBT-65536 2022NBT-70457 Goat_Colon-6__c484048 Goat_Rectum-4__c743964_1 Roe_deer_Cecum-1__c487795 Roe_deer_Cecum-1__c515077 Roe_deer_Cecum-5__c21094_1 Roe_deer_Cecum-5__c4603 Roe_deer_Rectum-5__c247583 Roe_deer_Rumen-5__c4486 Water_buffalos_Cecum-1__c544885_1 Water_buffalos_Rectum-4…
VC41	2	64.01	64.01	1958	0.03159	0.979387	2022NBT-12987 2022NBT-38322
VC42	9	32.2	1159	10100	0.1028	0.239851	2022NBT-8535 2022NBT-34743 2022NBT-460_1 2022NBT-73219 2022NBT-110_1 Roe_deer_Rectum-2__c45187 Water_deer_Cecum-3__c464035_1 Roe_deer_Rectum-4__c1300 Roe_deer_Rectum-4__c654
VC43	7	275	5775	66900	0.07945	0.999299	2022NBT-1343 2022NBT-1852 2022NBT-26 2022NBT-506 2022NBT-86 2022NBT-27 2022NBT-463
VC44	5	69.76	697.6	13900	0.04762	0.928164	2022NBT-13590 2022NBT-57375 2022NBT-30959 2022NBT-49602 2022NBT-38998
VC45	2	415.7	415.7	6223	0.06257	0.979387	2022NBT-11053 2022NBT-9036
VC46	12	86.54	5712	9685	0.3704	0.00430778	2022NBT-3176_1 2022NBT-20804 Goat_Rectum-5__c505581_1 2022NBT-29719 Goat_Colon-4__c179873_1 Goat_Colon-5__c43709_1 Water_buffalos_Rectum-4__c274755 2022NBT-66672_1 2022NBT-72346_1 Dairy_cattle_Colon-3__c607471 Sheep_Colon-5__c501253_1 Sheep_Rectum-1__c10846
VC47	8	115.1	3223	2017	0.6132	0.00193802	Roe_deer_Omasum-4__c1928 Roe_deer_Rumen-3__c1516 Water_buffalos_Reticulum-1__c676499 Water_buffalos_Omasum-4__c222201 Goat_Rumen-1__c377567_1 Roe_deer_Omasum-4__c5422 Roe_deer_Rumen-2__c1454 Roe_deer_Rumen-4__c61519
VC48	2	600	600	12500	0.04595	0.979387	2022NBT-14746 2022NBT-15172
VC49	28	102.7	38800	56700	0.4063	0.0023513	Goat_Colon-1__c280203 Water_deer_Rectum-3__c555210 Roe_deer_Rectum-2__c8 Water_deer_Rectum-2__c31915 Roe_deer_Cecum-5__c4520 Roe_deer_Cecum-2__c278169 Roe_deer_Cecum-2__c894 Roe_deer_Cecum-5__c5165 Water_deer_Cecum-2__c115229 Goat_Cecum-2__c842740 Roe_deer_Rectum-1__c702002 Water_deer_Rectum-5__c392937 Sheep_Rectum-1__c90140 Roe_deer_Cecum-1__c658916 Roe_deer_Cecum-2__c73741 Roe_deer_Cecum-5__c38…
VC50	4	41.14	246.9	4698	0.04984	0.992931	Goat_Rumen-1__c84907 Water_deer_Abomasum-3__c141511 Water_deer_Rumen-4__c246 s1422.goat-hifiasm001474l
VC51	10	133.2	5996	10100	0.371	0.012874	Goat_Colon-1__c150 2022NBT-31390 2022NBT-22808 Goat_Rectum-4__c663 Roe_deer_Omasum-3__c163878 Roe_deer_Rectum-3__c18554 Sheep_Rumen-4__c382502_1 Water_deer_Cecum-1__c15105 Water_deer_Cecum-4__c1000 Water_deer_Rectum-2__c173397
VC52	3	521.9	1566	17200	0.08346	0.985452	Goat_Omasum-4__c319470 Sheep_Duodenum-3__c504 Sheep_Ileum-5__c788
VC53	4	17.21	103.2	2177	0.04512	0.992931	2022NBT-20938 flye-dairy_71533 s5175.goat-hifiasm005292l flye-goat_4230
VC54	19	88.93	15200	67100	0.1846	0.0682526	2022NBT-1385 2022NBT-2788 2022NBT-6596 2022NBT-6961 2022NBT-11621 Water_buffalos_Colon-4__c55221 2022NBT-1862_1 Goat_Cecum-2__c391243_1 2022NBT-56281 Dairy_cattle_Rectum-3__c845502 Goat_Colon-2__c397106_1 Goat_Rectum-1__c207445 Roe_deer_Rectum-3__c2182 Water_buffalos_Colon-2__c188522 Water_buffalos_Rectum-4__c257020 Water_buffalos_Rectum-5__c54707 Water_deer_Cecum-2__c483633 Water_deer_Rectum-1__…
VC55	3	60.69	182.1	1920	0.08635	0.985452	2022NBT-48247 2022NBT-49721 2022NBT-65209
VC56	10	127.9	5757	6401	0.4727	0.00700964	2022NBT-27029 Sheep_Omasum-3__c400193 Water_deer_Rumen-2__c495607 Goat_Rectum-4__c687968 2022NBT-22604 Roe_deer_Rumen-1__c13010 Water_deer_Rectum-3__c531697 Water_deer_Cecum-4__c645 Water_buffalos_Reticulum-4__c159339 2022NBT-61339
VC57	6	220.1	3302	39000	0.07805	0.984681	Goat_Ileum-3__c162537 Goat_Jejunum-2__c9 Roe_deer_Cecum-5__c355443 Roe_deer_Colon-1__c44544 contig_66112 Goat_Rectum-5__c175
VC58	2	212.9	212.9	600	0.2606	0.658454	Goat_Duodenum-3__c527 flye-goat_20257
VC59	11	87.53	4814	4849	0.4971	0.00156372	2022NBT-4876 s485.goat-hifiasm002920l Sheep_Rectum-3__c1245688 2022NBT-63295 flye-dairy_58111 flye-dairy_59209 flye-dairy_66440_1 s11323.goat-hifiasm011504l s1676.goat-hifiasm001734l s17292.goat-hifiasm017521l s92945.dairy-hifiasm092960l
VC60	29	31.21	12700	9414	0.5723	0	2022NBT-1736_1 2022NBT-5732_1 2022NBT-9068_1 2022NBT-12587_1 2022NBT-66377 2022NBT-369_1 2022NBT-42598_1 2022NBT-570_1 2022NBT-60668_1 2022NBT-6270_1 2022NBT-6387_1 2022NBT-65617 2022NBT-66047 Goat_Cecum-2__c248903_1 Goat_Rectum-1__c296928_1 Goat_Rectum-3__c24009 Goat_Rectum-3__c599932 Goat_Rectum-6__c108737 Roe_deer_Cecum-4__c139141 Roe_deer_Rectum-4__c130845_1 Sheep_Rectum-1__c494586 Water_buff…
VC61	4	143.3	860	12800	0.06278	0.992931	2022NBT-35639 2022NBT-39290 Water_buffalos_Cecum-5__c391821 Water_deer_Cecum-3__c23547
VC62	12	120.8	7971	22700	0.2595	0.881708	Dairy_cattle_Abomasum-6__c575210 Sheep_Duodenum-4__c175390 contig_49355 contig_7391 Sheep_Reticulum-5__c778774 Sheep_Rumen-3__c123919 Water_buffalos_Rumen-1__c321 Goat_Omasum-4__c179996 Goat_Omasum-6__c559075 Goat_Abomasum-5__c999 Goat_Rumen-4__c334092 contig_103937
VC63	2	194.9	194.9	4165	0.04466	0.658454	2022NBT-16884 2022NBT-33859
VC64	14	205	18700	146000	0.1135	0.99848	Roe_deer_Cecum-1__c1196 2022NBT-7056 2022NBT-7453 Goat_Colon-1__c199 Sheep_Rectum-3__c227413 Water_buffalos_Cecum-1__c651912 Goat_Cecum-4__c538 Goat_Colon-6__c725167 Goat_Rectum-6__c288835 Goat_Colon-2__c484741 Goat_Colon-4__c241323 Goat_Rectum-4__c255840 Goat_Rectum-6__c1535 Goat_Cecum-6__c763555
VC65	3	343.2	1030	29400	0.03384	0.985452	2022NBT-4725 2022NBT-3543 Water_buffalos_Cecum-4__c24517
VC66	36	116.8	73600	169000	0.3027	0.324151	2022NBT-10218 2022NBT-10759 2022NBT-21990 Goat_Colon-1__c50 Roe_deer_Rectum-5__c1428 Yak_Colon-5__c326942 Goat_Rectum-4__c398179 2022NBT-12539 2022NBT-14667 2022NBT-17278 2022NBT-19163 2022NBT-19257 2022NBT-20053 2022NBT-20151 2022NBT-23920 2022NBT-24836 2022NBT-25915 2022NBT-30917 2022NBT-36824 2022NBT-8523 Goat_Cecum-1__c662 Goat_Cecum-4__c435039_1 Goat_Colon-2__c139012 Goat_Colon-2__c398572 Go…
VC67	5	34.41	344.1	2487	0.1211	0.996692	2022NBT-48247 2022NBT-49721 2022NBT-65209 2022NBT-52100 Roe_deer_Rectum-2__c235028
VC68	9	122.8	4422	44800	0.0899	0.999853	2022NBT-12475 2022NBT-27964 Goat_Colon-2__c181646 Sheep_Rumen-5__c967997 Water_deer_Cecum-3__c470375 Water_deer_Colon-4__c32797 Water_deer_Ileum-2__c19066 Water_deer_Omasum-2__c246167 flye-goat_18951
VC69	14	461.5	42000	151000	0.2182	0.989839	2022NBT-4568 2022NBT-7586 2022NBT-7660 Roe_deer_Cecum-3__c188 Roe_deer_Rectum-1__c101452 2022NBT-13144 2022NBT-7559 Roe_deer_Cecum-2__c2714 Roe_deer_Colon-5__c703 Roe_deer_Rectum-2__c869 Roe_deer_Colon-2__c543 Water_deer_Rectum-2__c382514 Roe_deer_Cecum-1__c2065 Roe_deer_Cecum-5__c3356
VC70	42	93.09	80200	430000	0.1571	0.999998	2022NBT-1849 2022NBT-2744 2022NBT-6416 2022NBT-10069 2022NBT-10476 2022NBT-10736 2022NBT-11744 2022NBT-18037 2022NBT-18153 2022NBT-3436 2022NBT-4079 2022NBT-4424 2022NBT-4485 2022NBT-6383 2022NBT-6567 2022NBT-7240 2022NBT-7252 2022NBT-7527 2022NBT-7830 2022NBT-8403 2022NBT-8827 2022NBT-8865 2022NBT-9464 2022NBT-9772 Goat_Cecum-5__c161472 2022NBT-11339 2022NBT-12483 2022NBT-14014 2022NBT-17772 202…
VC71	2	461.1	461.1	1846	0.1995	0.979387	Roe_deer_Rumen-2__c213131 Roe_deer_Omasum-2__c176125
VC72	7	89.26	1875	1525	0.5492	0.0107254	2022NBT-17009 Goat_Cecum-2__c253223 2022NBT-7706_1 Dairy_cattle_Rectum-4__c300138 Goat_Colon-2__c90122 Roe_deer_Cecum-4__c39_1 Sheep_Colon-3__c332813_1
VC73	9	132.4	4766	13700	0.2574	0.961306	2022NBT-15495 2022NBT-16669 Roe_deer_Rectum-5__c1221 Roe_deer_Colon-1__c1391 flye-goat_3930 Goat_Rumen-4__c102052 2022NBT-37386 Sheep_Colon-3__c216280 Water_buffalos_Colon-1__c263792
VC74	3	225.5	676.4	1650	0.29	0.33126	2022NBT-46326 2022NBT-45898 2022NBT-16438_1
VC75	18	163.8	25100	203000	0.11	0.999999	2022NBT-1876 2022NBT-2467_1 2022NBT-2763 2022NBT-5151 2022NBT-7719 Roe_deer_Colon-1__c167 Roe_deer_Rumen-3__c337 2022NBT-1601 2022NBT-3631 2022NBT-4622 2022NBT-7187 2022NBT-7325 2022NBT-7410 Roe_deer_Cecum-1__c817 Roe_deer_Colon-1__c47630 Roe_deer_Colon-2__c284345 Roe_deer_Colon-4__c907 Sheep_Rectum-1__c23316
VC76	3	233.9	701.6	2036	0.2558	0.985452	2022NBT-38432 2022NBT-19850 2022NBT-40498
VC77	2	386.4	386.4	3568	0.0976	0.979387	2022NBT-27218 2022NBT-30903
VC78	28	36.94	14000	19600	0.4155	0.00118384	2022NBT-22118_1 2022NBT-17594 Goat_Colon-6__c559937 Roe_deer_Cecum-5__c215284 Roe_deer_Colon-5__c139145 Water_deer_Rectum-3__c154170 2022NBT-68620 Goat_Colon-4__c47702 Goat_Colon-4__c585514 Roe_deer_Cecum-5__c2094 Roe_deer_Cecum-5__c260603 Roe_deer_Colon-5__c169 Roe_deer_Rectum-2__c26041 Sheep_Colon-1__c285045 Sheep_Colon-2__c222136 Sheep_Rectum-1__c168159 Sheep_Rectum-1__c7849 Water_buffalos_Abo…
VC79	4	103.8	622.8	17400	0.03448	0.992931	2022NBT-4756 2022NBT-19426 flye-goat_20463 Goat_Reticulum-5__c31330
VC80	15	111.9	11800	6531	0.6416	0.000131084	2022NBT-10853 2022NBT-11116 2022NBT-5553_1 2022NBT-8509_1 2022NBT-2147_1 2022NBT-5546_1 2022NBT-5585_1 2022NBT-57168 2022NBT-60540 2022NBT-71_1 Dairy_cattle_Duodenum-1__c447156 Dairy_cattle_Duodenum-3__c95405 flye-dairy_51421 s20579.dairy-hifiasm020581c s60143.dairy-hifiasm060149c
VC81	5	513.5	5135	16600	0.2364	0.734565	2022NBT-5441 2022NBT-8893 2022NBT-11506 2022NBT-14552 2022NBT-15077
VC82	8	60.85	1704	1145	0.5948	0.000469553	2022NBT-49713_1 2022NBT-64493 2022NBT-65498 2022NBT-66724 Goat_Jejunum-2__c200854 Goat_Rumen-2__c309060 flye-goat_2218_1 s9909.goat-hifiasm010080l_1
VC83	2	327.1	327.1	16200	0.01975	0.979387	2022NBT-20729 2022NBT-22323
VC84	5	111.1	1111	10800	0.09314	0.996692	2022NBT-14730 Water_deer_Rectum-4__c100224 2022NBT-18762 Water_deer_Colon-4__c315216 Water_deer_Rectum-3__c102402
VC85	40	9.06	7067	38100	0.1563	0.355517	2022NBT-6317 Sheep_Colon-4__c88631 2022NBT-21915 Roe_deer_Cecum-2__c1518 Roe_deer_Rectum-2__c179413 Roe_deer_Cecum-3__c1470 Roe_deer_Rectum-1__c2086 2022NBT-118909 2022NBT-155747 Dairy_cattle_Cecum-2__c150207 Roe_deer_Cecum-4__c1338 Roe_deer_Cecum-4__c297249 Roe_deer_Colon-4__c63360 Roe_deer_Rectum-2__c301239 Roe_deer_Rectum-4__c126553 Sheep_Cecum-4__c476472 Sheep_Colon-1__c8274 Sheep_Colon-2__c7…
VC86	2	444.7	444.7	15400	0.02799	0.979387	2022NBT-21206 2022NBT-31107
VC87	5	59.58	595.8	4587	0.1147	0.996692	2022NBT-1163_1 2022NBT-21313_1 2022NBT-46048_1 Goat_Ileum-2__c167170_1 Sheep_Duodenum-3__c39739
VC88	17	119.9	16300	52300	0.2377	0.999032	Roe_deer_Abomasum-1__c1588 Goat_Colon-1__c605763 Goat_Rectum-1__c102171 Goat_Abomasum-2__c129779 Sheep_Cecum-1__c721416 Roe_deer_Reticulum-5__c101 Dairy_cattle_Colon-2__c457930 Goat_Rumen-2__c933250 Water_buffalos_Colon-1__c730592 Goat_Rumen-5__c489815 Goat_Rumen-2__c146279 Roe_deer_Abomasum-1__c614 Water_buffalos_Cecum-1__c109083_1 Water_deer_Cecum-2__c403828 Water_deer_Colon-1__c37532 Water_dee…
VC89	3	277.8	833.5	17300	0.04597	0.985452	Roe_deer_Cecum-4__c480680 Roe_deer_Jejunum-1__c476 Roe_deer_Rectum-5__c481
VC90	31	14.04	6529	3430	0.6515	0	Roe_deer_Cecum-2__c26 2022NBT-156353 Goat_Colon-1__c571329 Goat_Duodenum-1__c91560 Goat_Ileum-6__c136964 Goat_Ileum-6__c76257 Goat_Rectum-1__c522331_1 Goat_Rectum-1__c690792_1 Goat_Rectum-5__c27810_1 Goat_Rumen-2__c585018 Roe_deer_Cecum-4__c327462 Sheep_Abomasum-4__c582917 Sheep_Duodenum-1__c23529 Sheep_Duodenum-3__c316837 Sheep_Duodenum-3__c320980 Sheep_Rectum-1__c213520 Sheep_Rectum-1__c396182 …
VC91	4	465.2	2791	5471	0.3375	0.557383	2022NBT-17800 2022NBT-17886 2022NBT-24100 2022NBT-26958
VC92	5	69.12	691.2	1152	0.3729	0.265435	Water_deer_Cecum-3__c430526 Water_deer_Colon-2__c88134 2022NBT-135192 Goat_Cecum-3__c52531 Goat_Rectum-3__c782887
VC93	9	71.92	2589	30500	0.0782	0.999853	Roe_deer_Cecum-2__c1915 2022NBT-35639 2022NBT-39290 Water_buffalos_Colon-1__c932269 2022NBT-29217 Water_buffalos_Cecum-5__c391821 Water_deer_Cecum-3__c23547 Yak_Cecum-1__c64764 Sheep_Cecum-5__c95
VC94	30	39.46	17200	17800	0.4906	2.72e-09	2022NBT-32027_1 2022NBT-2627_1 2022NBT-1037_1 2022NBT-11592_1 2022NBT-12516_1 2022NBT-22745_1 2022NBT-23919_1 2022NBT-24586_1 2022NBT-33186_1 2022NBT-3877_1 2022NBT-60702 2022NBT-60963 2022NBT-61289 2022NBT-65974 2022NBT-66241 2022NBT-70685 2022NBT-9244_1 Dairy_cattle_Cecum-3__c127681 Dairy_cattle_Cecum-4__c529644 Dairy_cattle_Colon-3__c833679 Goat_Cecum-2__c96528_1 Goat_Rectum-1__c113710 Goat_Re…
VC95	4	425.5	2553	8514	0.2305	0.992931	2022NBT-29938 Roe_deer_Rectum-5__c478 Water_buffalos_Reticulum-1__c469351 2022NBT-34404
VC96	35	79.27	47200	130000	0.2665	0.983733	2022NBT-14852 2022NBT-16712 2022NBT-11144 2022NBT-8728 2022NBT-11929 2022NBT-17508 2022NBT-19216 2022NBT-19471 2022NBT-23229 2022NBT-24529 2022NBT-28738 2022NBT-35426 2022NBT-36558 2022NBT-42956_1 2022NBT-5485 2022NBT-6907 Goat_Cecum-3__c716151 Goat_Colon-2__c604941 Goat_Colon-6__c205721 Goat_Duodenum-6__c59680 Goat_Omasum-4__c566771 Roe_deer_Colon-1__c840597 Roe_deer_Duodenum-2__c980 Roe_deer_Om…
VC97	5	403.3	4033	35000	0.1034	0.996692	2022NBT-5151 Roe_deer_Rumen-3__c337 Roe_deer_Colon-2__c284345 Roe_deer_Rectum-2__c174275 Sheep_Rectum-1__c23316
VC98	2	360.7	360.7	4758	0.07042	0.979387	2022NBT-20639 2022NBT-27926
VC99	5	447.6	4476	66900	0.06268	0.996692	2022NBT-2815 2022NBT-3634 2022NBT-5720 2022NBT-9985 2022NBT-15955
VC100	2	178.8	178.8	1900	0.08588	0.658454	2022NBT-25414 2022NBT-39046
VC101	9	202.9	7303	26600	0.2152	0.998216	Sheep_Rectum-3__c337 Sheep_Rectum-4__c87685 Water_deer_Colon-1__c235596 2022NBT-17733 2022NBT-29938 Roe_deer_Rectum-5__c478 Water_buffalos_Reticulum-1__c469351 2022NBT-34404 Water_deer_Cecum-2__c218
VC102	5	190.7	1907	6596	0.224	0.734565	2022NBT-11310 2022NBT-14590 2022NBT-9501 2022NBT-74138 2022NBT-78168
VC103	29	35.06	14200	42400	0.2509	0.978395	2022NBT-21581 Water_deer_Cecum-5__c290 Goat_Colon-6__c788 Goat_Rectum-4__c56529 Roe_deer_Reticulum-4__c1602 Water_deer_Rectum-1__c452 flye-dairy_53119 flye-goat_2359 2022NBT-17742 2022NBT-32569 Roe_deer_Rectum-2__c64089 2022NBT-28274 2022NBT-32271 2022NBT-34474 2022NBT-40535 2022NBT-59401 Goat_Cecum-5__c664291 Goat_Colon-1__c650003 Roe_deer_Abomasum-3__c491 Roe_deer_Rectum-5__c2958 Sheep_Rectum-1…
VC104	4	417.2	2503	36900	0.06346	0.992931	2022NBT-3634 2022NBT-5720 2022NBT-9985 2022NBT-15955
VC105	16	73.14	8776	39400	0.1819	0.999944	2022NBT-6116 2022NBT-38992 2022NBT-22848 2022NBT-41086 2022NBT-36326 Water_deer_Rectum-3__c107634 2022NBT-19250 2022NBT-38580 Goat_Ileum-2__c48895 Roe_deer_Rectum-4__c3956 Water_deer_Cecum-2__c285601 flye-goat_5640 s1988.goat-hifiasm002058l 2022NBT-15184 2022NBT-67227 Sheep_Rumen-1__c1248704
VC106	14	118	10700	29900	0.264	0.814868	Roe_deer_Rectum-2__c609 Roe_deer_Cecum-2__c2220 Roe_deer_Cecum-3__c1811 Water_deer_Cecum-2__c329530 Sheep_Colon-3__c549596 Water_deer_Colon-4__c183481 Goat_Cecum-2__c788895 Roe_deer_Cecum-5__c4347 Water_deer_Colon-3__c128774 Water_deer_Rectum-4__c1421 Water_deer_Cecum-3__c570227 Roe_deer_Cecum-2__c349888 Roe_deer_Colon-4__c1034 Water_deer_Cecum-3__c62679
VC107	21	117.1	24600	52200	0.3199	0.128815	Roe_deer_Duodenum-2__c97002 Sheep_Rumen-1__c305461 Roe_deer_Colon-4__c1398 Water_buffalos_Abomasum-1__c460867 Water_deer_Omasum-5__c21028 2022NBT-23210 Sheep_Rumen-1__c347061 Water_deer_Cecum-1__c86989 Water_deer_Omasum-3__c36335 Water_deer_Omasum-5__c181031 Goat_Omasum-6__c358476 Roe_deer_Colon-4__c168436 Sheep_Omasum-2__c923143 Sheep_Rectum-3__c1232409 Sheep_Reticulum-3__c274787 Goat_Colon-5__c…
VC108	5	80.57	805.7	1378	0.3673	0.417266	2022NBT-17014 2022NBT-65558 Roe_deer_Colon-5__c1650_1 Yak_Cecum-1__c1027857 Yak_Duodenum-3__c381696
VC109	45	40.7	40300	155000	0.206	1	Sheep_Ileum-2__c15667 Sheep_Ileum-4__c1412 Water_deer_Rectum-1__c38 flye-goat_5950 2022NBT-9407 2022NBT-23026 2022NBT-36273 2022NBT-7613 Dairy_cattle_Cecum-2__c313641 Dairy_cattle_Colon-5__c887490 Goat_Duodenum-1__c382017 Goat_Rumen-1__c452819 Roe_deer_Colon-1__c278188 Roe_deer_Rectum-4__c475415 Yak_Cecum-2__c1065785 s3087.goat-hifiasm003181l 2022NBT-10395 2022NBT-38992 2022NBT-45994 2022NBT-5783…
VC110	5	106.8	1068	11000	0.08857	0.996692	2022NBT-19378 2022NBT-25968 2022NBT-31373 2022NBT-30994 2022NBT-36141
VC111	19	52.64	9001	34800	0.2052	0.998802	Goat_Cecum-4__c928543 Goat_Rectum-4__c591982 Water_deer_Rectum-1__c269527 Roe_deer_Rectum-3__c312596 Water_deer_Rectum-3__c107634 2022NBT-19250 2022NBT-25248 Goat_Ileum-2__c48895 Sheep_Ileum-3__c208 Sheep_Rumen-4__c1531959 Water_deer_Rumen-4__c249507 flye-goat_5640 s1988.goat-hifiasm002058l Water_deer_Rectum-3__c462413 2022NBT-15184 Sheep_Ileum-5__c524 2022NBT-40683 2022NBT-63845 Roe_deer_Rectum-…
VC112	3	374.8	1124	19200	0.05541	0.985452	Roe_deer_Cecum-3__c800 Roe_deer_Rectum-4__c633 Roe_deer_Cecum-5__c229658
VC113	6	411.1	6167	23600	0.207	0.885117	Roe_deer_Cecum-1__c117217 Roe_deer_Cecum-3__c215164 Roe_deer_Rectum-3__c646632 Sheep_Colon-2__c7377 Sheep_Rectum-1__c236 Sheep_Rectum-5__c705217
VC114	2	200.5	200.5	1335	0.1302	0.979387	2022NBT-40917 2022NBT-29760
VC115	4	140.9	845.5	14000	0.05688	0.943824	Sheep_Rectum-4__c385 Roe_deer_Rectum-2__c337610 Sheep_Colon-4__c1243 Roe_deer_Cecum-2__c1926
VC116	16	84.82	10200	41100	0.1983	0.00835001	2022NBT-1385 2022NBT-11621 Water_buffalos_Colon-4__c55221 2022NBT-1862_1 Goat_Cecum-2__c391243_1 2022NBT-56281 Dairy_cattle_Rectum-3__c845502 Goat_Colon-2__c397106_1 Goat_Rectum-1__c207445 Roe_deer_Rectum-3__c2182 Water_buffalos_Colon-2__c188522 Water_buffalos_Rectum-4__c257020 Water_buffalos_Rectum-5__c54707 Water_deer_Cecum-2__c483633 Water_deer_Rectum-1__c370857 Water_deer_Rectum-3__c161513
VC117	29	9.209	3739	8727	0.2985	0.00141375	2022NBT-16884 Roe_deer_Cecum-2__c15843 Roe_deer_Cecum-1__c160348 2022NBT-117428 2022NBT-106663 2022NBT-120573 2022NBT-126696 2022NBT-126720 2022NBT-45788 Goat_Cecum-2__c493603 Goat_Cecum-3__c122833 Goat_Cecum-3__c169006 Goat_Cecum-6__c456737 Roe_deer_Cecum-1__c41349 Roe_deer_Cecum-2__c225472 Roe_deer_Cecum-2__c23842 Roe_deer_Cecum-2__c482416 Roe_deer_Cecum-2__c516013 Roe_deer_Cecum-5__c12893 Roe_…
VC118	8	64	1792	3063	0.3678	0.078127	2022NBT-8696_1 Dairy_cattle_Cecum-2__c1144948 Dairy_cattle_Colon-4__c589007 Goat_Jejunum-5__c182630 Goat_Jejunum-6__c96096 Yak_Duodenum-3__c452218 Yak_Rumen-3__c1761320 s98819.dairy-hifiasm098837l
VC119	2	362.9	362.9	6674	0.05154	0.979387	2022NBT-4120 2022NBT-11223
VC120	33	12.12	6401	27200	0.1902	0.454056	Sheep_Colon-4__c88631 2022NBT-15029 Roe_deer_Cecum-2__c1518 Roe_deer_Rectum-2__c179413 Roe_deer_Cecum-3__c1470 Roe_deer_Rectum-1__c2086 2022NBT-118909 2022NBT-155747 Dairy_cattle_Cecum-2__c150207 Roe_deer_Cecum-4__c1338 Roe_deer_Cecum-4__c297249 Roe_deer_Colon-4__c63360 Roe_deer_Rectum-2__c301239 Roe_deer_Rectum-4__c126553 Sheep_Cecum-4__c476472 Sheep_Colon-1__c8274 Sheep_Colon-2__c759368 Sheep_C…
VC121	3	394.5	1184	18400	0.06043	0.985452	Water_buffalos_Colon-1__c534336 Water_buffalos_Rectum-1__c535717 Water_deer_Colon-2__c430188
VC122	4	530	3180	9333	0.254	0.903035	2022NBT-4293 Yak_Rumen-5__c1149075 Sheep_Colon-5__c234946 Water_buffalos_Colon-1__c968045
VC123	2	112.2	112.2	2234	0.04774	0.658454	2022NBT-9127 2022NBT-61358
VC124	16	27.77	3333	5710	0.3672	0.0261304	2022NBT-570_1 Goat_Cecum-2__c248903_1 Goat_Rectum-6__c108737 2022NBT-65367 2022NBT-74397 Dairy_cattle_Colon-6__c177629 Goat_Colon-6__c434615 Goat_Rectum-1__c261907 Goat_Rectum-3__c654594_1 2022NBT-64174 Goat_Cecum-1__c10661 Goat_Rectum-1__c363778_1 Dairy_cattle_Rectum-1__c292597 Goat_Colon-4__c269947 Sheep_Rectum-1__c930974 Sheep_Cecum-1__c86_1
VC125	37	72.34	48200	92600	0.3421	0.376945	Sheep_Omasum-2__c75113 Roe_deer_Abomasum-1__c1588 2022NBT-18392 2022NBT-25885 Goat_Colon-1__c605763 Goat_Rectum-1__c102171 Goat_Abomasum-2__c129779 Sheep_Cecum-1__c721416 2022NBT-11591_1 2022NBT-54752 Roe_deer_Reticulum-5__c101 2022NBT-34235 2022NBT-34767 2022NBT-40287 2022NBT-41861 2022NBT-46504 2022NBT-49163 2022NBT-49179 2022NBT-62758 2022NBT-92410 Dairy_cattle_Colon-2__c457930 Goat_Rumen-2__c…
VC126	3	71.86	215.6	1092	0.1641	0.985452	Goat_Cecum-1__c395459 Goat_Colon-4__c225622 Goat_Colon-6__c872709
VC127	10	74.68	3360	9415	0.2626	0.136518	Goat_Omasum-4__c150240 Sheep_Reticulum-1__c349 Water_buffalos_Omasum-4__c876558 Water_buffalos_Reticulum-4__c274171 Sheep_Reticulum-2__c260598 flye-dairy_51717 Water_buffalos_Rumen-1__c1042944 Goat_Abomasum-6__c415598 Water_buffalos_Omasum-4__c987323 Dairy_cattle_Omasum-3__c234596
VC128	11	110.4	6074	3881	0.6088	0.000152171	2022NBT-17309_1 2022NBT-27550 2022NBT-34772_1 2022NBT-36774 2022NBT-44813_1 2022NBT-63684 2022NBT-75969 Sheep_Abomasum-2__c380446 s19071.goat-hifiasm019311l s21705.goat-hifiasm021963l s8614.goat-hifiasm008769l
VC129	5	147.8	1478	31400	0.04498	0.996692	2022NBT-11624 2022NBT-12133 2022NBT-14343 2022NBT-37941 2022NBT-21362
VC130	3	127.4	382.3	9747	0.03772	0.959572	Goat_Cecum-4__c261646 Goat_Colon-2__c48888 Water_deer_Colon-4__c201030
VC131	18	136.9	20900	61100	0.2553	0.151915	2022NBT-4451 Goat_Cecum-1__c173084 Roe_deer_Rectum-2__c609 2022NBT-5886 Roe_deer_Cecum-2__c2220 Roe_deer_Colon-5__c1542 Roe_deer_Cecum-3__c1811 Water_deer_Cecum-2__c329530 Sheep_Colon-3__c549596 Water_deer_Colon-4__c183481 Goat_Cecum-2__c788895 Roe_deer_Cecum-5__c4347 Water_deer_Colon-3__c128774 Water_deer_Rectum-4__c1421 Water_deer_Cecum-3__c570227 Roe_deer_Cecum-2__c349888 Roe_deer_Colon-4__c10…
VC132	24	37.98	10500	33900	0.2358	0.999328	Roe_deer_Rectum-2__c117044 Sheep_Colon-2__c656122 Sheep_Rectum-5__c352841 Roe_deer_Colon-5__c264934 Sheep_Colon-2__c450381 2022NBT-29536 Roe_deer_Cecum-4__c55 Goat_Colon-6__c105277 Roe_deer_Cecum-1__c251974 Roe_deer_Cecum-1__c545619 Roe_deer_Cecum-2__c1492 Roe_deer_Cecum-2__c2374 Roe_deer_Cecum-2__c301193 Roe_deer_Cecum-2__c319 Roe_deer_Cecum-2__c417951 Roe_deer_Cecum-2__c765 Roe_deer_Cecum-4__c6…
VC133	6	90.9	1363	27700	0.04697	0.998474	Goat_Omasum-4__c446543 Goat_Omasum-6__c147029 Goat_Rectum-4__c737218 Roe_deer_Cecum-4__c578 s8634.goat-hifiasm008789l 2022NBT-27435
VC134	9	151.5	5455	11600	0.3198	0.0260294	Roe_deer_Rectum-4__c535822 2022NBT-17680 Goat_Rectum-1__c131 2022NBT-81685 2022NBT-90157 Goat_Cecum-2__c275248 Goat_Rectum-3__c152287 Roe_deer_Rectum-1__c917 Water_buffalos_Cecum-1__c588642
VC135	10	17.43	784.5	1950	0.2848	0.338735	2022NBT-73153 2022NBT-83925 Sheep_Rumen-4__c922350 Sheep_Rectum-3__c500376 Roe_deer_Colon-3__c78876 Goat_Reticulum-2__c113199 Roe_deer_Duodenum-2__c3628 Roe_deer_Rectum-3__c602296 Roe_deer_Rumen-5__c379968 Sheep_Rumen-4__c208982
VC136	3	127.2	381.5	10500	0.03511	0.985452	2022NBT-6287 2022NBT-7445 2022NBT-46087
VC137	9	44.67	1608	2370	0.4024	0.213388	2022NBT-28732 flye-dairy_42401 2022NBT-67145 2022NBT-29269_1 2022NBT-57603 Sheep_Duodenum-3__c163452 Yak_Rectum-3__c360869 flye-goat_15985_1 s99890.dairy-hifiasm099909l
VC138	3	283.1	849.2	4401	0.1616	0.985452	s10561.goat-hifiasm010736l Roe_deer_Rumen-1__c8939 Water_deer_Cecum-2__c430249
VC139	22	47.71	11000	19000	0.3672	0.0236593	2022NBT-22118_1 2022NBT-17594 Goat_Colon-6__c559937 Roe_deer_Cecum-5__c215284 Roe_deer_Colon-5__c139145 Water_deer_Rectum-3__c154170 2022NBT-68620 Goat_Colon-4__c47702 Goat_Colon-4__c585514 Roe_deer_Cecum-5__c2094 Roe_deer_Cecum-5__c260603 Roe_deer_Colon-5__c169 Roe_deer_Rectum-2__c26041 Sheep_Colon-1__c285045 Sheep_Colon-2__c222136 Sheep_Rectum-1__c168159 Sheep_Rectum-1__c7849 Water_buffalos_Abo…
VC140	2	286.6	286.6	5467	0.04978	0.979387	2022NBT-24955 2022NBT-28293
VC141	5	29.02	290.2	110.3	0.7069	0.00609289	2022NBT-132384 2022NBT-132015 Dairy_cattle_Duodenum-4__c498431 Goat_Colon-6__c154811 Roe_deer_Rectum-5__c2659
VC142	2	418.1	418.1	14200	0.0286	0.979387	2022NBT-7114 Water_deer_Rectum-4__c108021
VC143	5	40.29	402.9	8506	0.04517	0.73519	2022NBT-19521 Goat_Cecum-3__c881457 Roe_deer_Rectum-5__c350 Roe_deer_Cecum-4__c44602 Water_deer_Rectum-2__c161073
VC144	2	165.9	165.9	1879	0.08096	0.979387	Goat_Rumen-6__c42192 Sheep_Omasum-3__c216104
VC145	2	107.6	107.6	937.2	0.1026	0.979387	2022NBT-73153 2022NBT-83925
VC146	4	588.4	3530	44900	0.07283	0.992931	2022NBT-4891 2022NBT-7339 2022NBT-20609 2022NBT-19638
VC147	8	372.5	10400	102000	0.09303	0.998062	2022NBT-2467_1 2022NBT-2763 2022NBT-5151 Roe_deer_Colon-1__c167 Roe_deer_Rumen-3__c337 Roe_deer_Cecum-1__c817 Roe_deer_Colon-2__c284345 Sheep_Rectum-1__c23316
VC148	3	420.3	1261	4899	0.2045	0.985452	2022NBT-18866 2022NBT-24661 Goat_Colon-6__c65603
VC149	4	156.6	939.5	1246	0.4284	0.0561756	2022NBT-95468 2022NBT-55245 2022NBT-97180 2022NBT-62633
VC150	9	61.06	2198	6871	0.2419	0.42991	2022NBT-57178 2022NBT-57993_1 Water_buffalos_Cecum-4__c740841 2022NBT-34056_1 2022NBT-64982 2022NBT-24010_1 2022NBT-56273_1 Goat_Rectum-6__c661948_1 2022NBT-7611_1
VC151	23	74.64	18900	64300	0.2269	0.965882	2022NBT-17747_1 2022NBT-42536 Roe_deer_Cecum-3__c169303_1 Roe_deer_Rectum-1__c1171_1 contig_103841 2022NBT-910_1 Water_deer_Rectum-4__c2817 2022NBT-38415 2022NBT-61359 2022NBT-1150_1 2022NBT-14118_2 2022NBT-26869_1 2022NBT-3917_1 2022NBT-40002 2022NBT-86909 Sheep_Rectum-1__c404848 2022NBT-57147 Goat_Jejunum-1__c31956_1 s48408.dairy-hifiasm048413l Roe_deer_Rectum-5__c175661 Water_buffalos_Rumen-4_…
VC152	4	175.1	1051	1662	0.3862	0.0561756	2022NBT-64366 Sheep_Colon-3__c204_1 Sheep_Colon-2__c303055 2022NBT-56475
VC153	2	314	314	696.8	0.3094	0.658454	2022NBT-33358_1 2022NBT-42829
VC154	9	95.21	3428	66200	0.04925	0.999713	Sheep_Rumen-2__c1602612 Roe_deer_Cecum-3__c800 Roe_deer_Colon-4__c3262 Dairy_cattle_Cecum-4__c897465 Dairy_cattle_Rectum-4__c7223 Roe_deer_Rectum-4__c633 Sheep_Rectum-2__c777936 Roe_deer_Cecum-5__c229658 Sheep_Rumen-4__c262
VC155	2	368.8	368.8	5947	0.05836	0.979387	Goat_Colon-2__c20884 Water_deer_Cecum-2__c39944
VC156	49	125.7	148000	211000	0.4125	3.21e-06	2022NBT-8889 Roe_deer_Omasum-2__c1681 2022NBT-5652 2022NBT-9308 Roe_deer_Duodenum-1__c505 Water_deer_Colon-3__c94 s4226.goat-hifiasm004333l Roe_deer_Reticulum-3__c513 Water_buffalos_Rumen-1__c599067 Water_deer_Rectum-1__c224864 flye-goat_1286 flye-goat_1647 s2872.goat-hifiasm002960l s28727.dairy-hifiasm028730l s3335.goat-hifiasm003430c s7042.goat-hifiasm007179l 2022NBT-11157 2022NBT-20792 Dairy_c…
VC157	14	52.48	4776	18300	0.2063	0.999739	2022NBT-32959 Sheep_Rectum-3__c1193525 Sheep_Rectum-3__c135826 Yak_Rumen-3__c1568053 Goat_Rectum-6__c708308 Water_buffalos_Omasum-1__c217406 2022NBT-96624 Water_deer_Rectum-2__c315011 flye-goat_7977 Water_buffalos_Cecum-1__c664679 2022NBT-48372_1 Goat_Rectum-1__c37179 Water_deer_Colon-3__c403658 Water_deer_Rectum-2__c204828
VC158	8	532.2	14900	128000	0.1046	0.999679	2022NBT-3567 2022NBT-5189 2022NBT-5261 2022NBT-5662 Dairy_cattle_Colon-4__c585048 Sheep_Rectum-2__c494042 Goat_Rectum-5__c440154 Dairy_cattle_Rectum-4__c576202
VC159	7	105.7	2220	44500	0.04752	0.999299	2022NBT-11624 2022NBT-12133 2022NBT-14343 2022NBT-18225 2022NBT-37941 2022NBT-15888 2022NBT-21362
VC160	4	338.1	2029	8128	0.1996	0.903035	2022NBT-15733 Goat_Rectum-5__c75431 2022NBT-54377 2022NBT-35836
VC161	7	21.18	444.8	2650	0.1431	0.989275	Roe_deer_Rectum-2__c65513 2022NBT-9568 Roe_deer_Omasum-5__c1933 flye-goat_16456 2022NBT-144765 2022NBT-35745 2022NBT-30664
VC162	9	47.47	1709	23200	0.06864	0.999853	Goat_Abomasum-6__c566222 Goat_Omasum-4__c301514 Goat_Rumen-6__c42192 Sheep_Omasum-3__c216104 Sheep_Omasum-3__c496 Sheep_Omasum-3__c740073 Sheep_Rumen-2__c1075 Water_buffalos_Abomasum-1__c512247 Water_buffalos_Rumen-3__c75851
VC163	15	60.2	6321	3039	0.6732	2.39e-05	Roe_deer_Reticulum-3__c2449 Water_deer_Rectum-4__c178300 Roe_deer_Cecum-1__c235427 Water_buffalos_Cecum-4__c247783 Roe_deer_Reticulum-3__c2475_1 Sheep_Rectum-1__c857519 Water_deer_Rumen-2__c179949_1 Yak_Abomasum-1__c1111774_1 Yak_Abomasum-5__c360056_1 Goat_Rectum-1__c538999 Roe_deer_Omasum-3__c168897 Roe_deer_Omasum-3__c188162_1 Sheep_Colon-3__c598893 Sheep_Rectum-1__c315546 Yak_Cecum-1__c787391
VC164	22	121.6	28100	107000	0.2084	0.9556	Roe_deer_Omasum-3__c986 flye-goat_3986 s3044.goat-hifiasm003138l s4724.goat-hifiasm004835l Goat_Reticulum-1__c662142 Goat_Rumen-2__c228391 Goat_Rumen-2__c268 Goat_Rumen-2__c930 Goat_Rumen-3__c1095 Goat_Rumen-3__c480 flye-goat_15533 flye-goat_20203 flye-goat_20878 flye-goat_3008 flye-goat_5485 flye-goat_8889 flye-goat_9844 s2440.goat-hifiasm002516l s2939.goat-hifiasm003031l s4138.goat-hifiasm00424…
VC165	3	98.52	295.6	3233	0.08361	0.985452	Goat_Cecum-4__c261646 Water_buffalos_Cecum-1__c699911 Water_deer_Colon-4__c201030
VC166	4	253.5	1521	38300	0.03816	0.992931	Roe_deer_Cecum-4__c339 Roe_deer_Colon-5__c607 Goat_Rectum-4__c82535 Sheep_Rectum-1__c680446
VC167	5	188.1	1881	5778	0.2453	0.969949	2022NBT-34519 Sheep_Jejunum-5__c157891 2022NBT-32199 Goat_Colon-4__c223450 Sheep_Jejunum-2__c48133
VC168	2	531.8	531.8	4412	0.1075	0.979387	2022NBT-13667 2022NBT-14204
VC169	17	8.788	1195	5255	0.1843	0.36525	flye-dairy_32853 s12970.goat-hifiasm013163l Sheep_Rumen-4__c922350 contig_172450 Water_deer_Cecum-2__c39757 Sheep_Rectum-3__c500376 Water_deer_Cecum-2__c538341 Roe_deer_Colon-3__c78876 Goat_Rumen-2__c246958 Roe_deer_Abomasum-4__c50792 Roe_deer_Reticulum-3__c242426 Goat_Rumen-3__c557898 Goat_Reticulum-2__c113199 Roe_deer_Duodenum-2__c3628 Roe_deer_Rectum-3__c602296 Roe_deer_Rumen-5__c379968 Sheep_…
VC170	8	61.58	1724	23800	0.06752	0.999679	Goat_Jejunum-2__c246384 Roe_deer_Rumen-5__c2949 Sheep_Ileum-4__c54 Goat_Jejunum-3__c28633 Sheep_Ileum-3__c198647 Sheep_Duodenum-3__c496028 Sheep_Jejunum-5__c20812 Goat_Reticulum-1__c491045
VC171	9	169.9	6117	129000	0.04515	0.999853	2022NBT-4018 Goat_Jejunum-3__c222321 Roe_deer_Cecum-4__c480680 Roe_deer_Colon-5__c216972 Roe_deer_Rectum-4__c2421 s6598.goat-hifiasm006730l Goat_Jejunum-3__c71646 2022NBT-9482 Roe_deer_Rectum-5__c481
VC172	10	183.3	8249	22300	0.2695	0.763662	Water_deer_Colon-1__c82 2022NBT-4554_1 2022NBT-6164_1 2022NBT-6238_1 Goat_Colon-3__c46810 Roe_deer_Cecum-4__c2399_1 Sheep_Rumen-1__c1401294_1 Roe_deer_Colon-4__c1816 Roe_deer_Jejunum-1__c502 Goat_Rumen-6__c1218
VC173	2	64.12	64.12	235.3	0.2113	0.658454	Water_buffalos_Rumen-1__c307852 Water_buffalos_Rumen-3__c315839
VC174	5	148	1480	10100	0.1276	0.996692	Water_deer_Rectum-3__c107634 2022NBT-19250 Goat_Ileum-2__c48895 flye-goat_5640 s1988.goat-hifiasm002058l
VC175	3	540.1	1620	5913	0.2149	0.985452	Roe_deer_Cecum-2__c551 flye-goat_7978 s1223.goat-hifiasm001269l
VC176	7	13.07	274.4	6118	0.04283	0.996355	2022NBT-21680 Roe_deer_Colon-3__c2351 Water_deer_Rectum-2__c118890 Roe_deer_Rumen-5__c202221 2022NBT-34106 Water_deer_Colon-2__c163255 Water_deer_Rectum-4__c262523
VC177	2	101.4	101.4	137.5	0.4174	0.658454	Roe_deer_Colon-5__c68612 Roe_deer_Rectum-5__c794
VC178	2	271.6	271.6	225.3	0.5422	0.110336	Sheep_Duodenum-5__c52011 Sheep_Duodenum-2__c76122
VC179	5	261.2	2612	5635	0.3164	0.894962	Water_buffalos_Abomasum-4__c628683_1 Water_buffalos_Rumen-3__c128654_1 Water_buffalos_Rumen-3__c75225_1 Water_buffalos_Rumen-5__c1617339_1 Yak_Reticulum-5__c173901_1
VC180	7	31.2	655.1	732	0.4676	0.00108251	Goat_Abomasum-1__c456238 Goat_Duodenum-1__c419496 Roe_deer_Abomasum-4__c126103 Sheep_Rumen-1__c804818 Water_buffalos_Rumen-1__c1090814 Water_buffalos_Rumen-3__c332863 Yak_Omasum-4__c42876
VC181	2	194	194	5017	0.03719	0.979387	Roe_deer_Abomasum-5__c1171 s50952.dairy-hifiasm050957l
VC182	5	141.1	1411	470.7	0.7459	0.00609289	s18855.dairy-hifiasm018857c Water_buffalos_Abomasum-1__c366900 flye-goat_21348 flye-goat_7249 flye-goat_9150
VC183	7	69.1	1451	2519	0.3642	0.125077	Roe_deer_Cecum-2__c15650 2022NBT-68283 Sheep_Colon-3__c986434 Water_buffalos_Rectum-1__c79639 Water_deer_Colon-4__c108710_1 Goat_Cecum-2__c843504 Water_buffalos_Colon-1__c694327
VC184	2	15.37	15.37	1037	0.01455	0.658454	Water_buffalos_Rumen-3__c1229055 Water_buffalos_Reticulum-3__c532897
VC185	6	22.62	339.3	1486	0.1847	0.98988	Roe_deer_Cecum-1__c160348 2022NBT-106663 Roe_deer_Cecum-2__c482416 Roe_deer_Rectum-2__c491698 Sheep_Colon-3__c281314 Water_deer_Colon-2__c29792
VC186	14	20.42	1859	2634	0.4111	0.0313805	2022NBT-106663 2022NBT-126696 2022NBT-45788 Goat_Cecum-2__c493603 Goat_Cecum-3__c122833 Goat_Cecum-3__c169006 Roe_deer_Cecum-1__c41349 Roe_deer_Cecum-2__c23842 Roe_deer_Cecum-2__c516013 Roe_deer_Cecum-5__c12893 Roe_deer_Colon-2__c525207_1 Sheep_Colon-2__c312617 Water_deer_Colon-2__c29792 Water_deer_Rectum-2__c239786_1
VC187	51	53.94	68800	25800	0.7264	0	2022NBT-31836 Sheep_Colon-2__c408680 Water_deer_Rectum-4__c267875 Water_deer_Cecum-1__c3425_1 Goat_Cecum-3__c681143 Goat_Reticulum-6__c445789 Sheep_Colon-5__c44843 2022NBT-365_1 2022NBT-5748_1 2022NBT-60964 2022NBT-62829 2022NBT-63323 2022NBT-64591 2022NBT-66702 2022NBT-67230 2022NBT-69620 2022NBT-73517 2022NBT-82389 2022NBT-915_1 Dairy_cattle_Colon-4__c81885 Goat_Cecum-1__c515077 Goat_Cecum-3__c…
VC188	2	576.5	576.5	18800	0.02968	0.979387	Roe_deer_Cecum-4__c1784 Roe_deer_Cecum-4__c480677
VC189	4	318.3	1910	49000	0.03752	0.992931	Roe_deer_Colon-5__c151 Sheep_Omasum-5__c499252 Sheep_Rumen-3__c1386560 Water_deer_Rectum-4__c158195
VC190	7	72.19	1516	13400	0.1014	0.999299	Roe_deer_Duodenum-2__c141 Goat_Rectum-3__c522 Roe_deer_Cecum-3__c615788 Water_deer_Cecum-2__c162763 Water_deer_Colon-1__c346133 Water_deer_Colon-2__c390333 Water_deer_Rectum-4__c95137
VC191	6	79.91	1199	16500	0.06752	0.998474	Sheep_Ileum-4__c54 Goat_Jejunum-3__c28633 Sheep_Ileum-3__c198647 Sheep_Duodenum-3__c496028 Sheep_Jejunum-5__c20812 Goat_Reticulum-1__c491045
VC192	2	238.3	238.3	2299	0.09375	0.979387	goat-scaffold_20031 s17869.goat-hifiasm018106l
VC193	7	28.84	605.7	2221	0.2132	0.989275	Water_deer_Rectum-2__c241 Roe_deer_Rectum-4__c132304 Goat_Colon-6__c305 Roe_deer_Cecum-5__c3013 Roe_deer_Rectum-5__c22917 Water_deer_Cecum-2__c39757 contig_72198
VC194	2	151.2	151.2	9456	0.01573	0.979387	Roe_deer_Rectum-4__c385250 Sheep_Rectum-1__c91175
VC195	4	45.78	274.7	225.9	0.5401	0.0561756	Water_deer_Cecum-3__c546429 Goat_Cecum-1__c72352_1 Roe_deer_Cecum-4__c8769 Water_deer_Rectum-3__c257581
VC196	2	252.2	252.2	3351	0.06992	0.979387	2022NBT-18497 2022NBT-25682
VC197	3	549.9	1650	9064	0.1539	0.808633	Roe_deer_Rumen-5__c1422 Sheep_Rumen-3__c249916 Yak_Rumen-5__c470311
VC198	3	196.3	588.9	20000	0.02864	0.985452	Sheep_Cecum-1__c234508 contig_111416 Sheep_Rumen-3__c396547
VC199	2	142.6	142.6	1837	0.07187	0.979387	contig_64198 s56365.dairy-hifiasm056370l
VC200	4	37.8	226.8	318.8	0.4097	0.332503	Roe_deer_Ileum-5__c29172 Water_deer_Colon-3__c508601 Water_deer_Ileum-2__c91898 Water_buffalos_Jejunum-2__c9455
VC201	12	73.01	4819	31400	0.1331	0.997868	Sheep_Ileum-2__c726 Water_deer_Cecum-3__c513431 Sheep_Ileum-4__c247589 Water_deer_Rectum-1__c269527 Sheep_Ileum-4__c97821 Goat_Ileum-2__c45 Sheep_Ileum-3__c208 Water_deer_Rectum-3__c462413 2022NBT-15184 Sheep_Ileum-5__c524 2022NBT-40683 Roe_deer_Rectum-4__c514308
VC202	7	88.45	1858	11600	0.1375	0.992403	Water_deer_Rectum-1__c269527 Sheep_Ileum-3__c208 Water_deer_Rectum-3__c462413 2022NBT-15184 Sheep_Ileum-5__c524 2022NBT-40683 Roe_deer_Rectum-4__c514308
VC203	4	49.98	299.9	4625	0.0608	0.905709	Sheep_Jejunum-3__c59140 Sheep_Rectum-1__c76785 Roe_deer_Rectum-3__c1884 contig_94200
VC204	2	252.6	252.6	2948	0.07881	0.979387	Roe_deer_Rectum-2__c337610 Roe_deer_Cecum-2__c1926
VC205	2	600	600	9589	0.05887	0.979387	2022NBT-10800_1 2022NBT-8861_1
VC206	6	448.3	6725	12700	0.3454	0.189239	Sheep_Omasum-2__c383539 Sheep_Rumen-2__c3294 flye-goat_5806 s1431.goat-hifiasm001483c_1 s606.goat-hifiasm000625l Sheep_Rumen-5__c2906
VC207	7	39.03	819.6	12400	0.06179	0.999299	Goat_Rumen-4__c536994 Roe_deer_Colon-2__c2243 2022NBT-27226 Roe_deer_Cecum-3__c480614 2022NBT-19367 Goat_Cecum-1__c513225 Goat_Reticulum-6__c114767
VC208	8	133.6	3740	1707	0.6846	0.000469553	Roe_deer_Omasum-3__c1898 Goat_Rumen-1__c828082 Roe_deer_Omasum-2__c2955 Roe_deer_Rectum-3__c469068 Roe_deer_Rumen-4__c1291 Water_deer_Rumen-5__c26 Water_deer_Rumen-5__c379110 Yak_Rumen-4__c2287708
VC209	2	19.82	19.82	513.7	0.03688	0.979387	Sheep_Rumen-3__c1543927 Dairy_cattle_Duodenum-2__c462464
VC210	3	111.7	335.2	13800	0.02376	0.985452	Sheep_Rumen-5__c68509 Sheep_Omasum-3__c228396 Sheep_Rumen-5__c2293
VC211	2	203.7	203.7	2242	0.08317	0.979387	Water_buffalos_Omasum-5__c732698 flye-dairy_6197
VC212	2	421.6	421.6	12500	0.03263	0.979387	Water_buffalos_Rectum-1__c812227 Water_buffalos_Colon-1__c899881
VC213	2	249.7	249.7	9132	0.0266	0.979387	Water_deer_Cecum-1__c215 Goat_Rectum-1__c94435
VC214	3	319.9	959.8	2612	0.2683	0.985452	2022NBT-72851 Roe_deer_Cecum-4__c120367_1 Roe_deer_Colon-4__c2357_1
VC215	9	13.01	468.4	7400	0.05939	0.995964	Water_deer_Omasum-3__c1711 Water_deer_Reticulum-3__c1890 flye-dairy_73627 Sheep_Rectum-5__c509943 Water_deer_Abomasum-2__c238694 Water_buffalos_Cecum-1__c606851 Water_deer_Colon-2__c223081 s12914.dairy-hifiasm012915l Water_buffalos_Rectum-4__c108853
VC216	3	209.6	628.8	4516	0.1221	0.985452	2022NBT-15184 2022NBT-40683 Roe_deer_Rectum-4__c514308
VC217	21	13.13	2757	3648	0.4276	0.00786866	Roe_deer_Cecum-1__c160348 2022NBT-117428 2022NBT-106663 2022NBT-126696 2022NBT-45788 Goat_Cecum-2__c493603 Goat_Cecum-3__c122833 Goat_Cecum-3__c169006 Roe_deer_Cecum-1__c41349 Roe_deer_Cecum-2__c23842 Roe_deer_Cecum-2__c482416 Roe_deer_Cecum-2__c516013 Roe_deer_Cecum-5__c12893 Roe_deer_Colon-2__c525207_1 Roe_deer_Rectum-2__c491698 Roe_deer_Rumen-4__c134379 Sheep_Colon-2__c312617 Sheep_Colon-3__c2…
VC218	4	39.61	237.6	208.9	0.5228	0.030301	Roe_deer_Colon-5__c464385 Roe_deer_Rectum-5__c350 Roe_deer_Cecum-4__c44602 Water_deer_Rectum-2__c161073
VC219	23	152.1	38500	58200	0.3977	0.000358163	Goat_Omasum-5__c59142 Water_deer_Reticulum-5__c248 Goat_Rumen-1__c746312 Roe_deer_Rumen-3__c3792 Sheep_Rectum-5__c846315 Water_buffalos_Rumen-1__c281320 Water_deer_Rumen-5__c155400 Water_deer_Rumen-3__c253003 Goat_Rumen-3__c591057 Goat_Colon-2__c426364 Goat_Cecum-2__c673548 2022NBT-24290 2022NBT-29610 2022NBT-30235 2022NBT-39123 Dairy_cattle_Cecum-2__c582405 Dairy_cattle_Rectum-6__c87939 Roe_deer…
VC220	24	143.6	39600	125000	0.2407	0.999996	2022NBT-23567_1 2022NBT-45000 2022NBT-51314 Goat_Rumen-5__c470594_1 Water_buffalos_Rumen-5__c1786079_1 flye-goat_9107 s9134.goat-hifiasm009294l_1 2022NBT-13675 2022NBT-38074 2022NBT-26343 2022NBT-45609_1 2022NBT-55947_1 2022NBT-893_1 Goat_Rumen-6__c135766_1 Goat_Rumen-6__c720412 Roe_deer_Omasum-2__c40796 Sheep_Colon-1__c212_1 Sheep_Colon-1__c711119 Sheep_Rumen-1__c1337279 Water_buffalos_Rumen-3__…
VC221	11	26.05	1433	15400	0.08498	0.118609	flye-dairy_47604 contig_5330 s23567.dairy-hifiasm023569l Sheep_Duodenum-4__c48555 Goat_Abomasum-1__c456238 Goat_Duodenum-1__c419496 Roe_deer_Abomasum-4__c126103 Sheep_Rumen-1__c804818 Water_buffalos_Rumen-1__c1090814 Water_buffalos_Rumen-3__c332863 Yak_Omasum-4__c42876
VC222	4	67.93	407.6	4332	0.08585	0.903035	Goat_Rumen-2__c548823 Goat_Rumen-1__c50053 contig_148706 contig_36592
VC223	4	358.3	2150	57100	0.03629	0.992931	Roe_deer_Cecum-4__c480680 Roe_deer_Colon-5__c216972 Roe_deer_Rectum-4__c2421 Roe_deer_Rectum-5__c481
VC224	34	11.04	6194	3296	0.6481	0	s12671.goat-hifiasm012863l Dairy_cattle_Reticulum-4__c107385 Roe_deer_Rectum-1__c1854 Sheep_Colon-3__c823959 Goat_Omasum-1__c433133 Goat_Rumen-5__c525250 Sheep_Rumen-1__c1272313 Water_buffalos_Jejunum-2__c67078 Yak_Jejunum-5__c361232 s13362.goat-hifiasm013564l Goat_Jejunum-1__c104506 Goat_Jejunum-1__c437187 Goat_Rumen-1__c92065 Goat_Rumen-1__c938044 Roe_deer_Rumen-4__c264413 Sheep_Omasum-5__c7195…
VC225	11	30.6	1683	15600	0.09718	0.396406	Roe_deer_Abomasum-5__c1171 flye-dairy_47604 s23567.dairy-hifiasm023569l s50952.dairy-hifiasm050957l 2022NBT-460_1 2022NBT-73219 2022NBT-110_1 Roe_deer_Rectum-2__c45187 Water_deer_Cecum-3__c464035_1 Roe_deer_Rectum-4__c1300 Roe_deer_Rectum-4__c654
VC226	4	392.5	2355	1638	0.5886	0.0151914	2022NBT-31554 Goat_Abomasum-3__c102397 Roe_deer_Rumen-3__c104938 Water_deer_Rumen-4__c26572
VC227	2	354.6	354.6	19600	0.01778	0.979387	flye-goat_15345 flye-goat_21076
VC228	7	142.9	3000	28900	0.09395	0.999299	2022NBT-23026 Dairy_cattle_Cecum-2__c313641 Dairy_cattle_Colon-5__c887490 Goat_Rumen-1__c452819 Roe_deer_Rectum-4__c475415 Yak_Cecum-2__c1065785 s3087.goat-hifiasm003181l
VC229	13	43.63	3404	3157	0.5167	0.000244072	Roe_deer_Jejunum-3__c52_1 Goat_Jejunum-4__c104408_1 flye-dairy_58877 s45874.dairy-hifiasm045879l_1 Roe_deer_Cecum-3__c83936 Roe_deer_Rumen-2__c9614 Roe_deer_Rumen-2__c6450 Roe_deer_Rumen-5__c223800 Goat_Ileum-2__c197109 Roe_deer_Omasum-3__c245 Roe_deer_Omasum-4__c5697 Roe_deer_Reticulum-4__c145854 Roe_deer_Rumen-5__c132423_1
VC230	26	102.5	33300	24200	0.5783	1.26e-08	contig_88112 Roe_deer_Rumen-2__c3845_1 s97.goat-hifiasm002273l_1 flye-goat_373_1 s1987.goat-hifiasm002057l_3 s9426.goat-hifiasm009588l Goat_Omasum-4__c133250 s2385.dairy-hifiasm002386l_1 s100.goat-hifiasm000101l_1 s520.goat-hifiasm000538l_1 Roe_deer_Omasum-2__c1414_1 flye-goat_13803_1 s5758.goat-hifiasm005879l_1 s2227.dairy-hifiasm002228l flye-dairy_43623 Goat_Reticulum-3__c7349 s39025.dairy-hifi…
VC231	5	179.8	1798	4044	0.3072	0.894962	flye-goat_2781 flye-goat_608 flye-goat_768 flye-goat_8415 s5603.goat-hifiasm005724l_1
VC232	6	154.3	2314	21600	0.09658	0.998474	flye-goat_21339 s1073.goat-hifiasm001114l s1872.goat-hifiasm001941l s291.goat-hifiasm000299l 2022NBT-906 2022NBT-1224
VC233	2	16.69	16.69	4917	0.003381	0.979387	s11123.goat-hifiasm011303l contig_1176
VC234	24	78.04	21500	58800	0.268	0.463036	2022NBT-4587 2022NBT-5648_1 Sheep_Rectum-3__c337 Sheep_Rectum-4__c87685 s9295.goat-hifiasm009456l 2022NBT-15495 2022NBT-16669 Roe_deer_Rectum-5__c1221 2022NBT-19349 Goat_Cecum-1__c257673 Roe_deer_Colon-1__c1391 Water_deer_Colon-1__c235596 2022NBT-8645 2022NBT-17733 flye-goat_3930 2022NBT-29938 Goat_Rumen-4__c102052 Roe_deer_Rectum-5__c478 Water_buffalos_Reticulum-1__c469351 2022NBT-34404 2022NBT-…
VC235	6	180.7	2711	3411	0.4419	0.0867427	Goat_Rumen-5__c963884 Goat_Ileum-4__c321887 Goat_Ileum-4__c104837 Goat_Duodenum-3__c333655 Goat_Jejunum-3__c388 s1507.goat-hifiasm001560l
VC236	88	82.82	317000	252000	0.5568	0	Roe_deer_Abomasum-5__c2150 Water_deer_Cecum-1__c70971_1 Water_deer_Colon-1__c15_1 Water_deer_Reticulum-5__c155 Roe_deer_Duodenum-2__c674 Goat_Rumen-6__c1589 Sheep_Reticulum-3__c392668_1 Sheep_Abomasum-4__c348081 Sheep_Duodenum-3__c268788_1 Water_deer_Reticulum-2__c216607_1 contig_55443 s19204.dairy-hifiasm019206l 2022NBT-20300_1 2022NBT-20985_1 2022NBT-26867_1 2022NBT-54301 2022NBT-7663_1 Roe_dee…
VC237	4	101.2	607	12300	0.04712	0.992931	s6002.goat-hifiasm006127l Goat_Cecum-6__c7267 Goat_Rectum-6__c1164 Water_deer_Rectum-4__c162868
VC238	2	600	600	4011	0.13	0.979387	Goat_Rumen-1__c400602 Water_deer_Rumen-2__c138958
VC239	6	219.7	3296	20000	0.1416	0.913257	Goat_Abomasum-5__c788342 Goat_Jejunum-3__c19214 Goat_Rumen-2__c162829 contig_129813 contig_57989 contig_37846
VC240	2	197.5	197.5	7728	0.02491	0.658454	s8014.goat-hifiasm008164l Goat_Rumen-2__c417395
VC241	5	286.9	2869	11000	0.2069	0.996692	flye-goat_11531_1 s3596.goat-hifiasm003692l flye-goat_14564_1 s18404.goat-hifiasm018644l s3413.goat-hifiasm003509l
VC242	50	84.29	103000	136000	0.4313	1.5e-06	Water_buffalos_Rumen-1__c1227228 contig_9091 2022NBT-4841_1 2022NBT-65665 Goat_Abomasum-5__c433288_1 Goat_Ileum-1__c78093 Goat_Jejunum-2__c365_1 Goat_Omasum-2__c73504_1 Roe_deer_Duodenum-2__c56394_1 Roe_deer_Jejunum-1__c417_1 Roe_deer_Jejunum-2__c49298_1 Roe_deer_Omasum-4__c4506_1 Sheep_Jejunum-4__c70444 Sheep_Omasum-4__c848971 Sheep_Rumen-1__c833217_1 Water_buffalos_Rumen-5__c645315 contig_67835…
VC243	19	169	28900	28300	0.5049	3.17e-05	s877.goat-hifiasm000914l 2022NBT-6 flye-goat_106 2022NBT-2031 2022NBT-5047 Roe_deer_Jejunum-1__c374 2022NBT-16962 2022NBT-16973 2022NBT-19628 2022NBT-20681 2022NBT-3216 2022NBT-40909 Goat_Ileum-6__c17 Sheep_Ileum-1__c90301 Sheep_Jejunum-3__c37571 Sheep_Omasum-4__c783770 Sheep_Rumen-5__c3731 Water_buffalos_Rumen-1__c564618 flye-goat_114
VC244	2	484.7	484.7	4027	0.1073	0.979387	2022NBT-10209 2022NBT-14521
VC245	5	86.7	867	14700	0.05554	0.996692	2022NBT-10253 Goat_Cecum-1__c579 2022NBT-29207 2022NBT-35897 Goat_Colon-2__c542182
VC246	5	11.62	116.2	3085	0.0362	0.996692	2022NBT-21680 Roe_deer_Rumen-5__c202221 2022NBT-34106 Water_deer_Colon-2__c163255 Water_deer_Rectum-4__c262523
VC247	5	411.5	4115	32600	0.1121	0.996692	2022NBT-10376 2022NBT-15911 2022NBT-16903 2022NBT-7691 2022NBT-13403
VC248	35	9.399	5592	24600	0.1849	0.357881	Sheep_Colon-4__c88631 2022NBT-8865 Roe_deer_Cecum-2__c1518 Roe_deer_Rectum-2__c179413 2022NBT-118909 2022NBT-155747 Dairy_cattle_Cecum-2__c150207 Roe_deer_Cecum-4__c1338 Roe_deer_Cecum-4__c297249 Roe_deer_Colon-4__c63360 Roe_deer_Rectum-2__c301239 Roe_deer_Rectum-4__c126553 Sheep_Cecum-4__c476472 Sheep_Colon-1__c8274 Sheep_Colon-2__c759368 Sheep_Colon-3__c946507 Sheep_Rectum-3__c406039 Sheep_Rect…
VC249	3	130.5	391.5	1337	0.2258	0.808633	2022NBT-15555_1 2022NBT-30451 2022NBT-48040
VC250	2	191.9	191.9	598.6	0.2416	0.979387	Roe_deer_Colon-4__c378668 Roe_deer_Rectum-4__c76722_1
VC251	6	44.6	669	8392	0.07373	0.998474	2022NBT-25259 2022NBT-18889 2022NBT-25266 2022NBT-2965_1 2022NBT-31007 2022NBT-34743
VC252	6	67.07	1006	4879	0.1706	0.98988	Roe_deer_Rectum-5__c648 Goat_Rumen-2__c980806_1 Goat_Cecum-2__c641887 s6957.dairy-hifiasm006958l Sheep_Omasum-5__c35984 Roe_deer_Cecum-3__c2386
VC253	2	221.1	221.1	572.8	0.2771	0.658454	2022NBT-460_1 2022NBT-73219
VC254	2	538.4	538.4	17100	0.03058	0.979387	2022NBT-11169 Roe_deer_Cecum-3__c721
VC255	2	591.3	591.3	14300	0.03982	0.979387	2022NBT-11201 2022NBT-9778
VC256	4	30.71	184.3	322.3	0.3581	0.156161	Goat_Reticulum-4__c266156_1 flye-goat_11945 Goat_Reticulum-5__c559949 s39149.dairy-hifiasm039154l
VC257	5	58.55	585.5	2704	0.1775	0.582734	2022NBT-19142 2022NBT-48577 2022NBT-757_1 2022NBT-52984 2022NBT-65431
VC258	2	226	226	758.5	0.2287	0.658454	2022NBT-11574_1 2022NBT-68033
VC259	4	21.64	129.9	1469	0.08082	0.969699	s6620.goat-hifiasm006752l s26090.goat-hifiasm026391l s5513.goat-hifiasm005633l Goat_Abomasum-5__c136459
VC260	7	32.38	679.9	2225	0.2329	0.972358	Sheep_Rectum-1__c18461 Water_deer_Rectum-2__c382094 2022NBT-139702 2022NBT-94992 Goat_Colon-5__c98622 Sheep_Rectum-4__c386596 Water_deer_Cecum-1__c178956
VC261	5	12.22	122.2	490.3	0.1963	0.989214	Sheep_Rumen-1__c190537 Water_buffalos_Rumen-1__c74781 Sheep_Omasum-2__c1011430 Goat_Rumen-5__c390612 Sheep_Rumen-5__c471024
VC262	31	54.72	25400	18600	0.577	0	2022NBT-58335 Goat_Cecum-3__c43924 Goat_Colon-1__c182037 Goat_Colon-1__c341635 Goat_Rumen-2__c149642_1 Goat_Rumen-2__c682476 Roe_deer_Cecum-5__c377 Sheep_Abomasum-1__c28813 Sheep_Abomasum-4__c225565 Sheep_Omasum-1__c495576 Sheep_Reticulum-1__c278813 Sheep_Rumen-2__c802331 Sheep_Rumen-5__c3593 s32805.dairy-hifiasm032809c s42407.goat-hifiasm042848l s44451.goat-hifiasm044917l 2022NBT-8465_1 Goat_Rec…
VC263	5	102	1020	992.9	0.5043	0.0183569	2022NBT-55277_1 2022NBT-5711_1 2022NBT-5804_1 2022NBT-67995 2022NBT-69663
VC264	45	98.74	97800	51800	0.6532	0	Goat_Duodenum-1__c221602_1 Goat_Duodenum-2__c174665 Goat_Rectum-2__c131505 Goat_Rumen-3__c2850 Goat_Rumen-4__c269180 Goat_Rumen-4__c826623 Roe_deer_Colon-1__c1104_1 Roe_deer_Jejunum-1__c71377 Roe_deer_Rectum-4__c432358 Roe_deer_Rumen-3__c283561 Sheep_Ileum-1__c80114 Sheep_Rumen-4__c869878 Water_buffalos_Colon-1__c677826 flye-dairy_68302 flye-goat_15133_1 flye-goat_2038 flye-goat_2039 flye-goat_92…
VC265	7	69.98	1470	4692	0.238	0.985079	2022NBT-63094 Dairy_cattle_Cecum-4__c105649 Roe_deer_Rectum-4__c3637 Dairy_cattle_Colon-5__c172095_1 Goat_Rectum-3__c597474 Yak_Cecum-3__c835746 Water_deer_Rectum-4__c1709
VC266	31	55.62	25900	86800	0.2294	0.999887	2022NBT-17724 2022NBT-29797 2022NBT-25466 2022NBT-30208 2022NBT-69025 Dairy_cattle_Rectum-6__c499393 Goat_Reticulum-1__c56843 Goat_Reticulum-4__c618251 Goat_Rumen-2__c107 Goat_Rumen-3__c777857 Goat_Rumen-4__c833 Goat_Rumen-5__c450343 Water_buffalos_Colon-1__c34003 Water_deer_Colon-4__c174916 2022NBT-15812 2022NBT-18001 2022NBT-22201 2022NBT-30295 2022NBT-44210 2022NBT-45209 2022NBT-66602 Roe_deer…
VC267	18	112.9	17300	20500	0.4565	1.38e-05	Roe_deer_Reticulum-5__c1823 s44840.dairy-hifiasm044845l s57954.dairy-hifiasm057960l Dairy_cattle_Reticulum-2__c701337 flye-dairy_39990 Goat_Jejunum-2__c126477 flye-dairy_73462 flye-dairy_52116 Goat_Jejunum-3__c418895_1 Roe_deer_Abomasum-5__c654_2 flye-dairy_80108 Goat_Jejunum-3__c418063 Goat_Reticulum-4__c69121 Goat_Rumen-2__c3788 Sheep_Abomasum-2__c77 Sheep_Duodenum-5__c37342 Sheep_Omasum-2__c71…
VC268	2	600	600	7655	0.07264	0.979387	Sheep_Rumen-2__c766597 Sheep_Omasum-2__c247872
VC269	3	387.9	1164	5433	0.1762	0.985452	2022NBT-26919 2022NBT-18334 2022NBT-20146
VC270	6	152.3	2285	5984	0.2759	0.851023	Goat_Cecum-5__c11914 Goat_Rectum-5__c599467 Roe_deer_Rectum-3__c656982_1 Roe_deer_Rectum-5__c500_2 Water_deer_Cecum-2__c98556_1 Roe_deer_Omasum-5__c978
VC271	10	99.51	4478	23400	0.1608	0.999909	2022NBT-38992 2022NBT-22848 2022NBT-41086 2022NBT-36326 2022NBT-38580 Roe_deer_Rectum-4__c3956 Water_deer_Cecum-2__c285601 2022NBT-15184 2022NBT-67227 Sheep_Rumen-1__c1248704
VC272	29	140.2	56900	40100	0.5863	1.55e-08	2022NBT-12495 2022NBT-13346_1 2022NBT-15412_2 2022NBT-18207 2022NBT-21982_1 2022NBT-23497_1 2022NBT-24322_1 2022NBT-2928_1 2022NBT-3127_1 2022NBT-34667_1 2022NBT-36090 2022NBT-38422_1 2022NBT-38970 2022NBT-43527 2022NBT-9453_1 Goat_Rumen-1__c930300_1 2022NBT-24390 Water_buffalos_Colon-1__c659151 2022NBT-1136_1 2022NBT-19323_1 2022NBT-58272 2022NBT-58416 2022NBT-83172 2022NBT-88385 2022NBT-92905 2…
VC273	2	600	600	7594	0.07319	0.979387	2022NBT-14536 2022NBT-15192
VC274	6	130.8	1962	3090	0.3875	0.0327761	Sheep_Reticulum-1__c349 Sheep_Reticulum-2__c260598 flye-dairy_51717 Goat_Abomasum-6__c415598 Water_buffalos_Omasum-4__c987323 Dairy_cattle_Omasum-3__c234596
VC275	2	74.69	74.69	2106	0.03419	0.979387	Roe_deer_Colon-1__c2154 2022NBT-31719
VC276	3	63.72	191.2	794.5	0.1928	0.985452	2022NBT-28006 2022NBT-66161 Goat_Rectum-6__c350_1
VC277	2	160.4	160.4	2726	0.05549	0.979387	2022NBT-30067 2022NBT-23376
VC278	13	97.96	7641	5635	0.5744	7.39e-05	2022NBT-10157_1 2022NBT-14036_1 2022NBT-3206_1 2022NBT-61123 2022NBT-62394 2022NBT-38680 2022NBT-39252_1 2022NBT-52364_1 2022NBT-61800 2022NBT-62031 Goat_Rectum-6__c597387 Water_deer_Cecum-2__c473414 Water_deer_Rectum-3__c75163
VC279	2	516.8	516.8	11200	0.04404	0.979387	Sheep_Rectum-4__c385 Sheep_Colon-4__c1243
VC280	2	184.3	184.3	591.9	0.2362	0.979387	2022NBT-15457 Goat_Rumen-5__c715451
VC281	9	47.83	1722	5193	0.2484	0.97887	Water_buffalos_Omasum-1__c250068 2022NBT-84050 Goat_Rectum-4__c227693 Roe_deer_Cecum-1__c207213_1 Roe_deer_Colon-1__c841308_1 Sheep_Rectum-5__c803695 Water_deer_Rectum-3__c48655 Sheep_Rectum-4__c900667 Water_deer_Rectum-2__c451920
VC282	3	72.44	217.3	415.7	0.3401	0.66874	2022NBT-108818 2022NBT-85765 2022NBT-124601
VC283	2	271	271	7860	0.03331	0.979387	2022NBT-27060 2022NBT-29106
VC284	10	47.7	2146	4302	0.3318	0.153745	Water_buffalos_Rumen-1__c238509 Sheep_Abomasum-4__c566271 Goat_Rumen-5__c670720 Roe_deer_Colon-4__c2539 Roe_deer_Rectum-1__c483082 Sheep_Rectum-3__c468464 Sheep_Rumen-1__c542 Water_deer_Cecum-4__c585 Yak_Rumen-5__c535493 Water_buffalos_Abomasum-1__c355411
VC285	8	68.84	1928	2244	0.4603	0.0090645	s30733.dairy-hifiasm030736l s62160.dairy-hifiasm062166l 2022NBT-64366 Sheep_Colon-3__c204_1 Sheep_Rectum-2__c58993_1 Sheep_Colon-2__c303055 2022NBT-56475 Sheep_Duodenum-5__c146098
VC286	5	345.3	3453	8016	0.3008	0.338052	2022NBT-1678 2022NBT-21665 2022NBT-4565 2022NBT-23631 2022NBT-7175
VC287	2	600	600	13200	0.04341	0.979387	Goat_Omasum-1__c608267 Water_deer_Colon-4__c94639
VC288	3	172.1	516.3	1703	0.232	0.959572	2022NBT-17414 2022NBT-42285 2022NBT-47274
VC289	2	176.1	176.1	3621	0.04634	0.979387	2022NBT-23400 2022NBT-26423
VC290	2	126.3	126.3	6820	0.01817	0.979387	Roe_deer_Colon-1__c2394 Goat_Rectum-6__c145
VC291	2	121.8	121.8	997.7	0.1084	0.979387	Roe_deer_Colon-3__c500478 Roe_deer_Rectum-3__c28899
VC292	3	51.31	153.9	3241	0.04526	0.985452	2022NBT-42837 2022NBT-5159_1 2022NBT-49867
VC293	2	369.5	369.5	2013	0.1549	0.979387	2022NBT-18118 2022NBT-24803
VC294	7	7.8	163.8	759.6	0.1747	0.0790121	2022NBT-81059 Water_buffalos_Rectum-2__c184738 Dairy_cattle_Cecum-2__c375711 Yak_Cecum-3__c126732 Dairy_cattle_Rectum-4__c166035 Roe_deer_Colon-1__c668189 Roe_deer_Colon-3__c452255
VC295	6	74.33	1115	838.5	0.5673	0.00653261	2022NBT-52331 2022NBT-1895_1 2022NBT-12928_1 2022NBT-47675_1 2022NBT-63846_1 2022NBT-73365
VC296	3	600	1800	30200	0.05626	0.989794	2022NBT-18720 Sheep_Colon-3__c437635 Sheep_Rectum-3__c866
VC297	5	89.8	898	2532	0.2611	0.851865	2022NBT-19066_1 2022NBT-14074_1 2022NBT-49820 Dairy_cattle_Colon-4__c602 Roe_deer_Cecum-1__c120575
VC298	11	58.64	3225	23800	0.1192	0.999909	2022NBT-19230 2022NBT-68082 Goat_Cecum-1__c712968 Sheep_Rectum-3__c649759 Water_buffalos_Cecum-1__c342093 Water_buffalos_Rumen-4__c1175972 Water_deer_Colon-2__c343329 s11237.dairy-hifiasm011238l s22519.dairy-hifiasm022521l s40921.dairy-hifiasm040926l Dairy_cattle_Cecum-5__c618868
VC299	2	154.4	154.4	430.2	0.2623	0.979387	Water_buffalos_Rumen-3__c1585691_1 s50687.dairy-hifiasm050692c
VC300	9	97.8	3521	759.5	0.8191	0.00020473	2022NBT-15500_1 2022NBT-71599 2022NBT-69946 2022NBT-73814 2022NBT-49654 2022NBT-65670 2022NBT-74872 Yak_Cecum-1__c606661 Yak_Rumen-4__c1289018
VC301	3	457.3	1372	16000	0.07909	0.985452	2022NBT-20892 2022NBT-8316 2022NBT-15592
VC302	2	55.44	55.44	2302	0.02348	0.979387	2022NBT-21520 2022NBT-46087
VC303	4	24.39	146.4	4531	0.03124	0.992931	2022NBT-21755 2022NBT-58001 Goat_Rectum-1__c621536 Roe_deer_Colon-2__c542973
VC304	14	16.37	1489	7346	0.168	0.436119	2022NBT-55892 2022NBT-44578 Water_buffalos_Cecum-4__c851645 2022NBT-19763 2022NBT-104156 2022NBT-108818 2022NBT-43094 2022NBT-85765 2022NBT-96426 Roe_deer_Rectum-2__c123709 Roe_deer_Rectum-4__c249072 Roe_deer_Rectum-4__c365328 Sheep_Colon-1__c41740 2022NBT-124601
VC305	3	136.2	408.5	931.2	0.3036	0.33126	2022NBT-21942 2022NBT-20925_1 2022NBT-22028_1
VC306	2	238.1	238.1	2312	0.09321	0.979387	2022NBT-22092 2022NBT-22297
VC307	2	470	470	1611	0.2254	0.979387	2022NBT-23015 2022NBT-18638
VC308	12	17.82	1176	5854	0.1667	0.921394	2022NBT-28006 2022NBT-10081 2022NBT-17049 2022NBT-22111 2022NBT-48612 2022NBT-9357 2022NBT-66161 Goat_Cecum-4__c98162_1 Goat_Rectum-6__c350_1 Roe_deer_Cecum-2__c2189 flye-goat_20986 2022NBT-91785
VC309	2	453.5	453.5	434.5	0.5084	0.110336	2022NBT-62523 2022NBT-66412
VC310	3	118.5	355.5	328	0.5156	0.0952151	2022NBT-757_1 2022NBT-52984 2022NBT-65431
VC311	141	55.58	549000	177000	0.7559	0	2022NBT-25669_1 2022NBT-31973 2022NBT-44671_1 2022NBT-44717 2022NBT-51324 2022NBT-56911 Clostridium~phage~CDMH1 Clostridium~phage~phiMMP01 Clostridium~phage~phiMMP03 Clostridium~virus~phiC2 Goat_Cecum-2__c214922 Goat_Cecum-2__c94086_1 Goat_Cecum-3__c123869 Goat_Cecum-4__c389816 Goat_Cecum-6__c419070_1 Goat_Cecum-6__c488711 Goat_Colon-4__c269 Goat_Colon-6__c574074_1 Goat_Colon-6__c619519 Goat_Omas…
VC312	60	47.9	84800	56000	0.6018	0	2022NBT-25735 flye-dairy_72500 2022NBT-55695 2022NBT-10655_1 2022NBT-429_1 2022NBT-54536 2022NBT-67968 2022NBT-76164 2022NBT-78424 Goat_Cecum-3__c952525 Goat_Duodenum-1__c354316_1 Goat_Duodenum-3__c81475 Goat_Ileum-4__c129567 Goat_Ileum-4__c229568_1 Goat_Ileum-6__c5331_1 Goat_Jejunum-2__c81738 Goat_Jejunum-6__c105185 Goat_Reticulum-6__c232248 Goat_Rumen-5__c161642 Roe_deer_Cecum-1__c609659 Roe_de…
VC313	3	141.4	424.3	4502	0.08602	0.959572	2022NBT-18024_1 2022NBT-56991 2022NBT-98222
VC314	17	71.49	9723	14000	0.4087	0.00540438	2022NBT-42140_1 Yak_Cecum-2__c174347 2022NBT-38028 2022NBT-45315 2022NBT-46962 Goat_Cecum-5__c399459_1 Goat_Colon-1__c489501 Sheep_Rectum-1__c582 Sheep_Rectum-2__c929604 Sheep_Rectum-3__c760589 Water_buffalos_Cecum-4__c416559 Water_buffalos_Colon-4__c23836 Water_buffalos_Rumen-2__c2674062 Yak_Rumen-3__c362410 s2292.dairy-hifiasm002293l s24408.dairy-hifiasm024410l s57629.dairy-hifiasm057635l
VC315	13	83.31	6499	19000	0.2544	0.997959	2022NBT-76675 2022NBT-94983 Roe_deer_Rectum-4__c179471 Yak_Cecum-3__c724424 2022NBT-8063_1 Roe_deer_Colon-5__c601 2022NBT-23151_1 2022NBT-29588_1 Roe_deer_Cecum-4__c3283 2022NBT-14941_1 2022NBT-66849 2022NBT-722_2 2022NBT-79420
VC316	25	35.46	10600	14300	0.4255	0.00115858	Roe_deer_Cecum-5__c4064 2022NBT-10175 Dairy_cattle_Colon-4__c61 Goat_Rectum-1__c815809 Roe_deer_Cecum-4__c472877 Roe_deer_Colon-3__c100122 Sheep_Rectum-2__c735052 Water_buffalos_Rectum-4__c79314 flye-goat_21336 flye-goat_14154 Goat_Rumen-2__c1950 Goat_Rumen-2__c823887 Roe_deer_Abomasum-4__c47021 Roe_deer_Rumen-1__c207035 Sheep_Rectum-3__c32971 Water_buffalos_Rumen-1__c716792 Water_deer_Rectum-3__…
VC317	9	29.46	1061	4059	0.2065	0.907337	2022NBT-52508 Sheep_Rectum-1__c18461 Water_deer_Rectum-2__c382094 2022NBT-50276 2022NBT-139702 2022NBT-94992 Goat_Colon-5__c98622 Sheep_Rectum-4__c386596 Water_deer_Cecum-1__c178956
VC318	2	262.3	262.3	1989	0.1163	0.658454	2022NBT-38132 2022NBT-57858
VC319	2	220.4	220.4	1213	0.1534	0.979387	2022NBT-39716 2022NBT-34062
VC320	4	177.1	1063	5330	0.166	0.764757	Goat_Colon-3__c22845 2022NBT-38432 2022NBT-19850 2022NBT-40498
VC321	2	343.4	343.4	391.5	0.4648	0.110336	2022NBT-43216 2022NBT-43220
VC322	15	140.6	14800	85200	0.1477	0.999999	2022NBT-44671_1 2022NBT-56911 Goat_Cecum-3__c123869 Roe_deer_Rumen-5__c353409_1 Water_buffalos_Cecum-4__c25653 Roe_deer_Cecum-2__c987 2022NBT-28100_1 Goat_Colon-2__c187 Sheep_Rumen-1__c347191_1 Sheep_Rumen-1__c758029_1 Sheep_Rumen-1__c799817 Yak_Rumen-2__c1292443 flye-dairy_64397 Roe_deer_Rectum-4__c3813 Yak_Colon-4__c882961
VC323	17	69.83	9497	25200	0.2731	0.795781	Roe_deer_Cecum-3__c441 2022NBT-52940 2022NBT-58324 Roe_deer_Cecum-1__c130 Roe_deer_Cecum-2__c632237 2022NBT-55599 Goat_Cecum-1__c209 Sheep_Colon-2__c613431 Sheep_Omasum-1__c963526 Sheep_Rumen-2__c901 Sheep_Rumen-3__c1089458 Water_buffalos_Cecum-4__c708097 Water_buffalos_Colon-3__c73590 Water_deer_Colon-4__c211497 Yak_Cecum-1__c885173 Yak_Jejunum-5__c64299 s75452.dairy-hifiasm075464l
VC324	2	600	600	7806	0.07134	0.979387	2022NBT-4511 2022NBT-11332
VC325	3	86.86	260.6	1083	0.1931	0.808633	Sheep_Colon-3__c134 2022NBT-16673 Goat_Cecum-3__c775682
VC326	7	63.01	1323	1207	0.5201	0.0204568	Roe_deer_Jejunum-3__c195 Goat_Duodenum-3__c527 Goat_Duodenum-1__c587 s3553.goat-hifiasm003649c flye-goat_20257 Sheep_Duodenum-1__c30755 Sheep_Duodenum-5__c102205
VC327	2	255.8	255.8	723.7	0.2601	0.979387	2022NBT-28667 2022NBT-27510
VC328	4	48.53	291.2	3166	0.08404	0.992931	Sheep_Rectum-1__c459422 Goat_Colon-2__c585303 s42313.dairy-hifiasm042318l s9686.goat-hifiasm009851l
VC329	11	124	6821	4473	0.6028	4.08e-05	Roe_deer_Rectum-1__c1834_1 2022NBT-63105_1 Goat_Rectum-6__c58200 Goat_Rumen-4__c608486 Roe_deer_Cecum-1__c1811 Roe_deer_Cecum-4__c2202 Roe_deer_Cecum-5__c4546 Roe_deer_Rumen-5__c181011 Sheep_Rumen-5__c45 Water_buffalos_Colon-1__c616227 s42668.dairy-hifiasm042673l
VC330	3	170.6	511.8	3607	0.1241	0.985452	2022NBT-25384_2 2022NBT-59223 2022NBT-91555
VC331	4	177.4	1065	1033	0.5057	0.0561756	2022NBT-37667 2022NBT-17763_1 2022NBT-37297_1 2022NBT-68532_1
VC332	6	47.56	713.4	14300	0.04764	0.998499	Roe_deer_Cecum-5__c1431 2022NBT-10791 2022NBT-29207 2022NBT-11929 2022NBT-35897 Goat_Colon-2__c542182
VC333	2	438.9	438.9	4493	0.08892	0.979387	2022NBT-35549 2022NBT-35759
VC334	21	54.56	11500	14200	0.4465	1.06e-05	Sheep_Jejunum-4__c153775 2022NBT-69576 2022NBT-76551 Goat_Ileum-2__c107178 Goat_Jejunum-1__c317287 Sheep_Duodenum-5__c159401 Sheep_Ileum-2__c2540 Sheep_Ileum-2__c73039 Sheep_Jejunum-1__c628 Sheep_Jejunum-5__c47246 Yak_Duodenum-3__c13765 flye-dairy_43896 flye-dairy_66084 s40063.dairy-hifiasm040068l s40096.dairy-hifiasm040101l s51426.dairy-hifiasm051431l Water_deer_Ileum-3__c17116 Dairy_cattle_Duod…
VC335	9	63.69	2293	17100	0.118	0.999853	2022NBT-68082 Goat_Cecum-1__c712968 Sheep_Rectum-3__c649759 Water_buffalos_Rumen-4__c1175972 Water_deer_Colon-2__c343329 s11237.dairy-hifiasm011238l s22519.dairy-hifiasm022521l s40921.dairy-hifiasm040926l Dairy_cattle_Cecum-5__c618868
VC336	48	39.59	44700	74800	0.3736	0.0114461	Sheep_Omasum-2__c75113 2022NBT-57509 2022NBT-58248 2022NBT-18392 2022NBT-25885 2022NBT-37081 flye-goat_9111 2022NBT-54752 2022NBT-84768 2022NBT-119606 2022NBT-120838 2022NBT-34235 2022NBT-34767 2022NBT-40287 2022NBT-41861 2022NBT-46504 2022NBT-49163 2022NBT-49179 2022NBT-62758 2022NBT-92410 Goat_Rumen-3__c151430 Goat_Rumen-5__c515644 Goat_Rumen-5__c706657 Goat_Rumen-5__c931309 Roe_deer_Abomasum-1…
VC337	2	146.3	146.3	1146	0.1129	0.979387	2022NBT-58965 Goat_Cecum-5__c304030
VC338	12	51	3366	8582	0.2811	0.442617	Sheep_Rectum-3__c265838 Roe_deer_Colon-1__c451028 Sheep_Colon-1__c739960 Water_buffalos_Omasum-1__c250068 2022NBT-84050 Goat_Rectum-4__c227693 Roe_deer_Cecum-1__c207213_1 Roe_deer_Colon-1__c841308_1 Sheep_Rectum-5__c803695 Water_deer_Rectum-3__c48655 Sheep_Rectum-4__c900667 Water_deer_Rectum-2__c451920
VC339	6	75.74	1136	11700	0.08831	0.977336	2022NBT-27276 2022NBT-30833 Roe_deer_Rumen-3__c1488 Sheep_Rectum-5__c338649 Yak_Rectum-5__c1071928 Roe_deer_Reticulum-3__c196226
VC340	14	58.65	5338	15900	0.2515	0.436119	2022NBT-15526 Roe_deer_Colon-5__c351 Water_buffalos_Colon-1__c891086 Sheep_Rectum-3__c265838 Roe_deer_Colon-1__c451028 Sheep_Colon-1__c739960 Water_buffalos_Omasum-1__c250068 2022NBT-84050 Goat_Rectum-4__c227693 Roe_deer_Cecum-1__c207213_1 Roe_deer_Colon-1__c841308_1 Sheep_Rectum-5__c803695 Water_deer_Rectum-3__c48655 Water_deer_Rectum-2__c451920
VC341	6	42.03	630.5	11200	0.05343	0.65554	2022NBT-28029 2022NBT-41349 Sheep_Omasum-3__c635086 Dairy_cattle_Rumen-5__c1009421 Dairy_cattle_Omasum-5__c92190 Water_buffalos_Omasum-5__c788113
VC342	2	600	600	1710	0.2593	0.658454	2022NBT-8773 Goat_Colon-6__c374019
VC343	7	21.78	457.5	3647	0.1111	0.998353	Goat_Colon-3__c559210 Goat_Rumen-5__c356338 Water_deer_Omasum-5__c156 s21982.goat-hifiasm022244l Goat_Rectum-2__c252066 Roe_deer_Colon-5__c1398 s1379.goat-hifiasm001430l
VC344	11	67.45	3710	1675	0.6861	4.08e-05	Goat_Colon-5__c126349 Goat_Rectum-4__c323 Water_buffalos_Rectum-2__c468613 Water_buffalos_Rectum-2__c524291 2022NBT-52784 Water_buffalos_Colon-5__c578041 2022NBT-57883 2022NBT-82031 Goat_Cecum-2__c429190_1 Goat_Rectum-4__c624154_1 Yak_Cecum-2__c352253
VC345	2	190.5	190.5	2632	0.0674	0.979387	Goat_Cecum-1__c381056 Goat_Colon-1__c88474
VC346	3	20.71	62.14	166.8	0.2645	0.808633	Roe_deer_Rectum-3__c1350 Roe_deer_Rumen-3__c63568 Roe_deer_Cecum-3__c408057
VC347	2	433.5	433.5	5834	0.06912	0.979387	2022NBT-16653 2022NBT-17340
VC348	18	12.67	1938	7775	0.1988	0.000589318	Roe_deer_Colon-1__c2457 Roe_deer_Omasum-5__c200499 Water_buffalos_Rumen-1__c1137455 Chlamydia~phage~2 Bdellovibrio~phage~phiMH2K Chlamydia~phage~4 Chlamydia~phage~CPG1 Chlamydia~virus~CPAR39 Escherichia~phage~EC6098 Goat_Ileum-6__c47158 Goat_Ileum-6__c56905 Sheep_Omasum-3__c344133 Sheep_Rectum-3__c360709_1 Water_buffalos_Cecum-4__c79481_1 Water_deer_Rumen-1__c355133 Yak_Cecum-2__c318896_1 Yak_Cec…
VC349	5	359.9	3599	6057	0.3724	0.00609289	Clostridium~phage~CDKM9 Clostridium~virus~phiCD27 Clostridium~phage~CDKM15 Clostridium~phage~phiCD505 Clostridium~phage~phiMMP02
VC350	2	69.21	69.21	866.9	0.07362	0.979387	contig_140534 s5122.goat-hifiasm005238l
VC351	7	105.5	2216	35600	0.05866	0.999299	Dairy_cattle_Jejunum-6__c130533 Goat_Reticulum-1__c263331 Water_buffalos_Rumen-2__c2350428 flye-dairy_80414 s26168.goat-hifiasm026469l s32339.dairy-hifiasm032342l s8204.goat-hifiasm008354l
VC352	3	100.8	302.3	2173	0.1218	0.985452	2022NBT-43762 2022NBT-44851 2022NBT-39871
VC353	15	22.87	2402	2039	0.5372	0.000131084	2022NBT-125666 2022NBT-114425 2022NBT-130892 2022NBT-132348 Goat_Abomasum-3__c717551 Goat_Cecum-5__c162688 Goat_Colon-6__c890305 Goat_Rectum-5__c12629 Goat_Reticulum-5__c454276 Goat_Rumen-3__c111068 Roe_deer_Rumen-5__c2524 Sheep_Colon-5__c84564 Sheep_Rectum-4__c737084 Water_deer_Cecum-1__c91677 Water_deer_Colon-2__c546106
VC354	4	108.7	652.4	3254	0.1667	0.903035	Goat_Colon-2__c389 Roe_deer_Cecum-1__c1602 Roe_deer_Cecum-3__c1909 Water_deer_Rectum-2__c27
VC355	17	185	25200	12800	0.6624	3.53e-07	Yak_Rumen-4__c644350 Dairy_cattle_Duodenum-3__c228565 Dairy_cattle_Duodenum-3__c1945 Sheep_Abomasum-1__c122285 Sheep_Abomasum-2__c19579 Sheep_Jejunum-1__c251072 Sheep_Rumen-2__c450790 Sheep_Rumen-2__c699102 Sheep_Rumen-5__c194949 Water_buffalos_Rumen-4__c1366283 Yak_Duodenum-3__c68802 Yak_Rumen-4__c620645 Yak_Rumen-5__c422414 s11616.dairy-hifiasm011617l s11820.dairy-hifiasm011821l s51151.dairy-hi…
VC356	8	93.85	2628	16000	0.1407	0.998619	2022NBT-14730 Water_deer_Rectum-4__c100224 Sheep_Cecum-3__c66114 2022NBT-18762 Water_deer_Colon-4__c315216 Water_deer_Rectum-3__c102402 Sheep_Colon-1__c180576 Sheep_Cecum-1__c42
VC357	5	497.7	4977	2754	0.643	0.00583366	Brevibacillus~phage~Abouo Brevibacillus~phage~Davies Brevibacillus~phage~Jimmer1 Brevibacillus~phage~Jimmer2 Brevibacillus~phage~Osiris
VC358	21	218.6	45900	18100	0.7171	1.57e-08	Water_buffalos_Rectum-5__c147757 Yak_Cecum-3__c49651 Dairy_cattle_Colon-4__c1466232 Water_buffalos_Rectum-5__c420145 Yak_Rectum-1__c1101588 Roe_deer_Colon-2__c1900 Water_buffalos_Cecum-5__c568764 Water_buffalos_Cecum-5__c655568 Water_buffalos_Rectum-5__c271283 Water_buffalos_Rectum-5__c444213 Yak_Cecum-1__c496730 Yak_Cecum-1__c614086 Yak_Cecum-2__c419243 Yak_Colon-3__c88582 Water_buffalos_Cecum-5…
VC359	6	54.24	813.5	1811	0.3086	0.810761	Goat_Jejunum-4__c104408_1 s45874.dairy-hifiasm045879l_1 Roe_deer_Rumen-2__c9614 Roe_deer_Omasum-3__c245 Roe_deer_Reticulum-4__c145854 Roe_deer_Rumen-5__c132423_1
VC360	2	242.9	242.9	1190	0.1691	0.979387	Goat_Ileum-3__c271725 s8098.goat-hifiasm008248l
VC361	4	66.99	401.9	6343	0.05952	0.992931	Goat_Omasum-1__c113367 Goat_Rumen-1__c320231 Water_deer_Omasum-1__c172644 Water_deer_Omasum-2__c338443
VC362	9	87.76	3159	25100	0.1119	0.995964	Roe_deer_Duodenum-2__c141 Goat_Rectum-3__c522 Roe_deer_Cecum-3__c615788 Roe_deer_Rumen-3__c329693 Water_deer_Abomasum-2__c160995 Water_deer_Cecum-2__c162763 Water_deer_Colon-1__c346133 Water_deer_Colon-2__c390333 Water_deer_Rectum-4__c95137
VC363	7	59.09	1241	6860	0.1529	0.992403	flye-goat_19492 contig_156812 flye-dairy_58343 s8266.goat-hifiasm008417l flye-goat_11073_1 s21634.goat-hifiasm021892l_1 Sheep_Rumen-4__c301918_1
VC364	3	32.4	97.21	1677	0.05462	0.985452	Goat_Omasum-4__c301514 Sheep_Omasum-3__c142 Water_buffalos_Reticulum-1__c393718
VC365	3	24.91	74.74	306.1	0.1932	0.985452	Sheep_Rumen-1__c190537 Water_buffalos_Rumen-1__c74781 Sheep_Rumen-5__c471024
VC366	4	5.041	30.24	82.2	0.2511	0.557383	Sheep_Cecum-2__c1095 Roe_deer_Colon-5__c168608 Water_deer_Ileum-3__c98102 s100557.dairy-hifiasm100581l
VC367	6	137.3	2060	25800	0.07395	0.98988	2022NBT-19378 2022NBT-7439 2022NBT-25968 2022NBT-31373 2022NBT-30994 2022NBT-36141
VC368	23	55.09	13900	7579	0.6464	4.14e-08	2022NBT-20521_1 Goat_Cecum-3__c883648 2022NBT-75667 Sheep_Rectum-1__c582685 Dairy_cattle_Duodenum-2__c246224 Water_deer_Cecum-3__c534296_1 Water_deer_Colon-4__c278_1 2022NBT-63757 2022NBT-72851 Goat_Abomasum-1__c402475 Roe_deer_Cecum-4__c120367_1 Roe_deer_Cecum-4__c29957 Roe_deer_Colon-4__c2357_1 Roe_deer_Omasum-2__c261333 Roe_deer_Rectum-5__c2320 Roe_deer_Rectum-5__c329727 Roe_deer_Reticulum-5__…
VC369	6	23.67	355	286.8	0.543	0.0153195	Roe_deer_Colon-5__c464385 Roe_deer_Rectum-5__c350 Water_deer_Cecum-2__c226187 Water_deer_Omasum-3__c50116 Roe_deer_Cecum-4__c44602 Water_deer_Rectum-2__c161073
VC370	6	54.02	810.3	1125	0.4162	0.287587	Sheep_Duodenum-2__c310269 Sheep_Duodenum-5__c52011 Sheep_Duodenum-2__c251 Dairy_cattle_Duodenum-3__c536528_1 Sheep_Duodenum-4__c99501_1 Sheep_Duodenum-2__c76122
VC371	2	75.99	75.99	529.1	0.1248	0.979387	Goat_Rectum-6__c748256 Water_buffalos_Cecum-4__c388015
VC372	3	411.2	1234	8045	0.1329	0.985452	Goat_Rumen-2__c228391 flye-goat_15533 Goat_Rumen-2__c1891
VC373	2	45.01	45.01	779.4	0.05433	0.979387	Goat_Reticulum-3__c213477 Water_deer_Rumen-2__c219
VC374	2	25.14	25.14	953.9	0.02557	0.979387	Goat_Reticulum-3__c547038 Goat_Rumen-4__c1225
VC375	3	59.75	179.2	2857	0.05891	0.985452	Goat_Reticulum-6__c549017 Sheep_Omasum-3__c899 Sheep_Rumen-2__c1075
VC376	6	140.3	2105	25200	0.07702	0.998474	Goat_Rumen-2__c222741_1 2022NBT-15157_1 2022NBT-2600_1 2022NBT-44643_1 2022NBT-52060_1 s31019.goat-hifiasm031360l
VC377	8	10.7	299.5	531.5	0.3536	0.159034	Water_buffalos_Rumen-1__c307852 Water_deer_Cecum-3__c698870 Roe_deer_Colon-2__c606203 Sheep_Rectum-4__c921472_1 Goat_Colon-6__c257420 Water_buffalos_Rumen-3__c315839 Sheep_Rectum-2__c622260_1 Water_deer_Rectum-3__c184570
VC378	2	343.1	343.1	3349	0.09282	0.979387	flye-goat_3930 Goat_Rumen-4__c102052
VC379	2	254.4	254.4	6025	0.04048	0.979387	Roe_deer_Colon-2__c2243 Roe_deer_Cecum-3__c480614
VC380	3	57.56	172.7	289.5	0.3689	0.33126	Sheep_Omasum-3__c635086 Dairy_cattle_Omasum-5__c92190 Water_buffalos_Omasum-5__c788113
VC381	3	600	1800	5249	0.2551	0.823161	Goat_Rumen-6__c680 Goat_Reticulum-2__c354 Goat_Rumen-4__c1930
VC382	6	15.28	229.2	772.5	0.2261	0.993547	2022NBT-136045 Dairy_cattle_Rumen-3__c469 Goat_Cecum-5__c580760 Roe_deer_Rectum-3__c544047 Roe_deer_Rectum-5__c463651 Water_deer_Colon-4__c179993
VC383	5	21.97	219.7	5562	0.03793	0.996692	Roe_deer_Omasum-5__c250803 contig_126794 Water_deer_Reticulum-2__c334308 contig_69706 s43621.goat-hifiasm044075l
VC384	3	141.7	425.2	2673	0.137	0.985452	2022NBT-29207 2022NBT-35897 Goat_Colon-2__c542182
VC385	5	207.5	2075	7308	0.2209	0.952654	Roe_deer_Cecum-5__c4064 Dairy_cattle_Colon-4__c61 Roe_deer_Cecum-4__c472877 Sheep_Rectum-2__c735052 flye-goat_14154
VC386	3	172	515.9	6241	0.07628	0.985452	Roe_deer_Omasum-5__c200499 Water_buffalos_Rumen-1__c1137455 Water_deer_Abomasum-1__c41635
VC387	9	18.96	682.5	516.1	0.561	0.00308338	Roe_deer_Rectum-2__c159791 Roe_deer_Cecum-2__c103503 Goat_Colon-2__c709057 Dairy_cattle_Cecum-3__c468931 Roe_deer_Cecum-3__c619320 Roe_deer_Colon-3__c176075 Sheep_Rectum-1__c245676 Sheep_Rectum-2__c670319 Water_buffalos_Cecum-4__c796149
VC388	12	53.21	3512	60200	0.05511	0.999938	2022NBT-13667 2022NBT-14204 2022NBT-5736 2022NBT-6287 2022NBT-65964 2022NBT-7445 Roe_deer_Rectum-4__c1487 Water_deer_Cecum-2__c44 Water_deer_Colon-1__c207602 Water_deer_Rectum-4__c38853 flye-goat_4847 s6676.dairy-hifiasm006677l
VC389	37	80.11	53400	16500	0.763	0	Water_deer_Colon-2__c398872 2022NBT-57073 Roe_deer_Cecum-1__c435765 Sheep_Colon-2__c154670_1 Sheep_Colon-3__c421_1 Dairy_cattle_Colon-4__c325039 2022NBT-55818 2022NBT-57680 Dairy_cattle_Rectum-3__c858147 Goat_Cecum-4__c299590 Goat_Colon-3__c609497 Roe_deer_Cecum-1__c322515_1 Roe_deer_Cecum-3__c420757 Roe_deer_Rectum-4__c3870 Sheep_Colon-3__c928 Water_deer_Rectum-1__c108788 Yak_Cecum-5__c249178 Ya…
VC390	3	251.2	753.6	14200	0.05056	0.985452	Sheep_Ileum-3__c20480 Sheep_Jejunum-2__c287448 Sheep_Ileum-4__c116258
VC391	3	397.4	1192	11600	0.09319	0.985452	Roe_deer_Colon-4__c3010 Water_deer_Cecum-1__c368734 Sheep_Jejunum-3__c125659
VC392	3	162.9	488.6	5721	0.07861	0.985452	Dairy_cattle_Cecum-4__c897465 Dairy_cattle_Rectum-4__c7223 Sheep_Rectum-2__c777936
VC393	2	51.7	51.7	2136	0.02359	0.979387	Roe_deer_Duodenum-2__c802 Water_deer_Rumen-4__c199481
VC394	5	219.3	2193	2192	0.4989	0.00609289	Roe_deer_Omasum-3__c1898 Roe_deer_Omasum-2__c2955 Roe_deer_Rumen-4__c1291 Water_deer_Rumen-5__c379110 Yak_Rumen-4__c2287708
VC395	17	113.6	15400	9394	0.621	6.09e-06	Roe_deer_Cecum-5__c237 Roe_deer_Rumen-5__c1430 Sheep_Abomasum-1__c132092 flye-goat_21491 s78736.dairy-hifiasm078749l flye-dairy_76111 Roe_deer_Abomasum-3__c21878_1 Roe_deer_Rectum-5__c231934_1 Roe_deer_Reticulum-3__c33554 Sheep_Rumen-4__c583063 Yak_Cecum-5__c353360 Yak_Rumen-5__c2295449 flye-dairy_76822 flye-dairy_77776 s32647.dairy-hifiasm032650c s64046.dairy-hifiasm064053l s6572.goat-hifiasm006…
VC396	2	283.6	283.6	4155	0.06383	0.658454	Goat_Rectum-5__c419621 Goat_Cecum-6__c33015
VC397	3	467.2	1401	689.3	0.6684	0.0404278	Roe_deer_Rectum-2__c419797 Sheep_Rectum-5__c375 Water_deer_Rectum-1__c336606
VC398	2	64.77	64.77	539.4	0.1065	0.658454	2022NBT-6124_1 2022NBT-64697
VC399	14	77.68	7069	2041	0.7735	4.63e-06	Roe_deer_Rectum-4__c1875 2022NBT-27259_1 2022NBT-27291 2022NBT-47655 2022NBT-55441 2022NBT-82085 Goat_Cecum-1__c281653 Goat_Cecum-6__c404218 Goat_Colon-6__c34717 Goat_Rectum-2__c187675 Goat_Rectum-4__c69879 Goat_Rectum-6__c494688_1 Sheep_Rectum-1__c79213 Water_buffalos_Colon-5__c750866
VC400	3	600	1800	34600	0.04951	0.989794	Roe_deer_Rectum-4__c3561 Sheep_Duodenum-3__c254642 Water_deer_Colon-1__c21901
VC401	4	17.56	105.3	72.87	0.5657	0.0151914	Dairy_cattle_Rectum-6__c475095 Dairy_cattle_Cecum-1__c69963 Roe_deer_Rectum-1__c68469 Water_buffalos_Cecum-1__c693552
VC402	26	357.5	116000	72700	0.6148	8.7e-08	flye-goat_10210 s1393.dairy-hifiasm001394c Goat_Colon-1__c673707 Goat_Colon-1__c799282 Goat_Colon-4__c681800_1 Goat_Colon-5__c267425 Goat_Rumen-5__c385552 Goat_Rumen-5__c517381 Goat_Rumen-6__c28 Roe_deer_Cecum-3__c141 Roe_deer_Cecum-5__c2843 Roe_deer_Reticulum-5__c647 Roe_deer_Rumen-5__c2595 Sheep_Cecum-3__c112831 Sheep_Colon-3__c353894 Sheep_Ileum-5__c207962 Water_buffalos_Colon-1__c980279 Water…
VC403	3	35.65	106.9	1150	0.08468	0.985452	Roe_deer_Cecum-5__c320442 Roe_deer_Rumen-5__c165513 Roe_deer_Rectum-4__c29252
VC404	2	137.6	137.6	931.8	0.1282	0.979387	2022NBT-75145 2022NBT-48382
VC405	12	63.1	4164	3019	0.5778	3.83e-05	Goat_Omasum-3__c314972 2022NBT-70309 Roe_deer_Rumen-5__c3208 2022NBT-2855_1 2022NBT-52333 Dairy_cattle_Rumen-5__c2140672_1 Goat_Rumen-1__c947457_1 Goat_Rumen-4__c266374 Goat_Rumen-5__c626402 Sheep_Abomasum-5__c215848 Sheep_Rumen-2__c347763 Sheep_Rumen-5__c757191
VC406	2	324.6	324.6	7808	0.03989	0.979387	Sheep_Duodenum-3__c108683 Water_deer_Cecum-1__c52202
VC407	2	32.62	32.62	415.2	0.0722	0.979387	Sheep_Duodenum-4__c141681 Dairy_cattle_Duodenum-1__c350808
VC408	4	16.01	96.06	1033	0.08444	0.667497	Sheep_Duodenum-4__c303490 Sheep_Duodenum-4__c258132 Sheep_Duodenum-2__c633 Sheep_Duodenum-4__c273868
VC409	2	166.7	166.7	1409	0.1055	0.658454	Sheep_Jejunum-3__c59140 contig_94200
VC410	3	158.1	474.3	3744	0.1123	0.808633	2022NBT-39483 2022NBT-40845 2022NBT-76175
VC411	2	204.1	204.1	2248	0.08309	0.979387	flye-goat_17182_1 s17019.goat-hifiasm017245l_1
VC412	2	18.22	18.22	424.5	0.04079	0.979387	Water_buffalos_Cecum-1__c984112 2022NBT-35558
VC413	2	194.9	194.9	532.9	0.2663	0.979387	contig_51663 s17488.dairy-hifiasm017489l
VC414	36	124.4	78400	44000	0.6401	0	Goat_Rumen-6__c916 Goat_Rumen-6__c92127 flye-goat_19845 s13579.goat-hifiasm013782c s6573.goat-hifiasm006705l Goat_Reticulum-3__c369477 Goat_Reticulum-3__c714546 Goat_Rumen-1__c16 Goat_Rumen-3__c550035 Goat_Rumen-6__c1181 Goat_Rumen-6__c936 flye-goat_16586_1 flye-goat_20484 flye-goat_21270 flye-goat_6068 s3444.goat-hifiasm003540c s4790.goat-hifiasm004903l s511.goat-hifiasm000529c s6244.goat-hifias…
VC415	2	304.7	304.7	2184	0.1222	0.658454	Sheep_Rumen-4__c2839 contig_57386
VC416	4	71.57	429.4	4792	0.08211	0.992931	Water_deer_Cecum-2__c162763 Water_deer_Colon-1__c346133 Water_deer_Colon-2__c390333 Water_deer_Rectum-4__c95137
VC417	2	115.7	115.7	15.18	0.8578	0.110336	Goat_Cecum-1__c649624 Goat_Rectum-4__c561956
VC418	3	29.33	88	95.79	0.4637	0.0404278	Goat_Rectum-4__c14253 Goat_Rectum-1__c163361 Roe_deer_Rectum-5__c370
VC419	5	134.7	1347	5753	0.1894	0.969949	2022NBT-22848 2022NBT-32319 2022NBT-52476 2022NBT-54513 Water_deer_Cecum-2__c285601
VC420	16	132.9	16000	47400	0.2515	0.292365	2022NBT-4451 Roe_deer_Rectum-2__c609 Roe_deer_Cecum-2__c2220 Roe_deer_Colon-5__c1542 Roe_deer_Cecum-3__c1811 Water_deer_Cecum-2__c329530 Sheep_Colon-3__c549596 Water_deer_Colon-4__c183481 Goat_Cecum-2__c788895 Roe_deer_Cecum-5__c4347 Water_deer_Colon-3__c128774 Water_deer_Rectum-4__c1421 Water_deer_Cecum-3__c570227 Roe_deer_Cecum-2__c349888 Roe_deer_Colon-4__c1034 Water_deer_Cecum-3__c62679
VC421	4	98.4	590.4	1571	0.2722	0.557383	Roe_deer_Duodenum-2__c267328 Roe_deer_Omasum-4__c116705 Roe_deer_Rumen-5__c370696_1 Water_deer_Omasum-1__c150253
VC422	2	509.6	509.6	3211	0.1368	0.979387	Water_deer_Omasum-1__c51143 Water_deer_Rumen-5__c90497
VC423	8	14.86	416.2	4492	0.08452	0.996319	Water_deer_Rectum-4__c201657 2022NBT-48579 contig_167333 2022NBT-136045 Dairy_cattle_Rumen-3__c469 Goat_Cecum-5__c580760 Roe_deer_Rectum-3__c544047 Water_deer_Colon-4__c179993
VC424	2	188.9	188.9	3252	0.05483	0.979387	Roe_deer_Rectum-5__c1553 Water_deer_Cecum-1__c360944
VC425	22	210.9	48700	98200	0.3316	0.717381	contig_180443 flye-dairy_44482 flye-dairy_44484 flye-dairy_44486 flye-dairy_66944 flye-dairy_76639 flye-dairy_77312 s25067.dairy-hifiasm025069l Water_buffalos_Cecum-5__c1013566 Dairy_cattle_Jejunum-1__c202054 contig_139756 contig_28748 flye-dairy_15261 flye-dairy_15262 flye-dairy_15265 flye-dairy_16860 flye-dairy_16861 flye-dairy_16866 flye-dairy_31924 flye-dairy_78334 s21029.dairy-hifiasm021031c…
VC426	7	180.3	3787	20000	0.1594	0.999299	s95869.dairy-hifiasm095887l flye-dairy_57781 flye-dairy_34137 flye-dairy_72426 flye-dairy_8450 s67665.dairy-hifiasm067674l contig_138746
VC427	4	13.5	81	1137	0.06605	0.969699	flye-dairy_81246 Goat_Rumen-3__c618439 Roe_deer_Rumen-5__c1418 Roe_deer_Omasum-4__c2312
VC428	4	28	168	176.1	0.4771	0.0969654	Goat_Rumen-2__c246958 Roe_deer_Abomasum-4__c50792 Roe_deer_Reticulum-3__c242426 Roe_deer_Colon-3__c29754
VC429	4	22.8	136.8	1028	0.1166	0.903035	Sheep_Rectum-5__c509943 Water_deer_Abomasum-2__c238694 Water_deer_Colon-2__c223081 Water_buffalos_Rectum-4__c108853
VC430	2	343.1	343.1	5207	0.06178	0.979387	flye-goat_18951 s4628.goat-hifiasm006378l
VC431	77	84.16	246000	99200	0.7126	0	Sheep_Omasum-2__c387551 2022NBT-42789_1 2022NBT-54402 2022NBT-55486_1 2022NBT-59419 Roe_deer_Cecum-2__c473600 Water_deer_Rectum-1__c51329_1 s14049.dairy-hifiasm014050l s10402.goat-hifiasm010575l 2022NBT-62299 Water_deer_Cecum-1__c58_1 2022NBT-53963 2022NBT-82988 Dairy_cattle_Reticulum-6__c1461031 Faecalibacterium~phage~FP_Epona Goat_Abomasum-1__c213380_1 Goat_Cecum-1__c45751 Goat_Duodenum-1__c177…
VC432	2	110.7	110.7	414.4	0.2093	0.658454	flye-goat_570 s71.goat-hifiasm000072l_1
VC433	4	120.4	722.6	1239	0.3669	0.332503	Dairy_cattle_Duodenum-3__c78792 contig_102153 contig_51227 flye-dairy_62212
VC434	10	65.28	2937	4536	0.392	0.0809862	contig_65914 flye-dairy_80583 contig_138672 flye-dairy_66517 flye-dairy_75731 flye-dairy_76488 Yak_Duodenum-3__c72001 Goat_Rumen-3__c2104 Dairy_cattle_Reticulum-2__c418771 Dairy_cattle_Duodenum-3__c466212
VC435	2	302.2	302.2	2782	0.09787	0.979387	flye-goat_11451 s9930.goat-hifiasm010101l
VC436	18	100.6	15400	29000	0.3467	0.406216	Goat_Rumen-4__c1353 flye-dairy_61979 Goat_Rumen-1__c2727 Sheep_Rectum-2__c469044 Sheep_Rectum-2__c338172_1 Sheep_Rumen-3__c189261 flye-dairy_64207 flye-dairy_81285 Sheep_Rumen-1__c1014419 Sheep_Rumen-1__c868872_1 Yak_Rumen-2__c1546105 flye-dairy_16267 flye-dairy_5482 flye-dairy_61978 flye-dairy_62641 s3331.goat-hifiasm009547l s55738.dairy-hifiasm055743l s5860.dairy-hifiasm005861l
VC437	3	36.04	108.1	940.6	0.1025	0.959572	Goat_Rectum-3__c321211 Roe_deer_Abomasum-4__c1794 Sheep_Colon-5__c147856
VC438	8	126.4	3540	20600	0.1467	0.998062	Goat_Rumen-2__c228391 Goat_Rumen-2__c268 Goat_Rumen-3__c1095 Goat_Rumen-3__c2713 flye-goat_15533 flye-goat_9844 Goat_Rumen-2__c1891 flye-goat_20553
VC439	25	68.97	20700	54100	0.2767	0.607051	Sheep_Rectum-3__c337 Sheep_Rectum-4__c87685 s9295.goat-hifiasm009456l 2022NBT-16243 2022NBT-15495 2022NBT-16669 Roe_deer_Rectum-5__c1221 2022NBT-19349 Goat_Cecum-1__c257673 Roe_deer_Colon-1__c1391 Water_deer_Colon-1__c235596 2022NBT-22314 2022NBT-8645 2022NBT-17733 flye-goat_3930 2022NBT-29938 Goat_Rumen-4__c102052 Roe_deer_Rectum-5__c478 Water_buffalos_Reticulum-1__c469351 2022NBT-17337 2022NBT-…
VC440	14	123.4	11200	32700	0.2554	0.919453	flye-dairy_25857 flye-dairy_33343 flye-dairy_51360 flye-dairy_51361 flye-dairy_56833 flye-dairy_62958 s10021.dairy-hifiasm010022c s23161.dairy-hifiasm023163l s25888.dairy-hifiasm025890l s27101.dairy-hifiasm027103l s47304.dairy-hifiasm047309l s6262.dairy-hifiasm006263l s64456.dairy-hifiasm064464c s65367.dairy-hifiasm065375l
VC441	8	18.23	510.4	6540	0.07223	0.984338	Water_deer_Reticulum-3__c1890 Sheep_Rectum-5__c509943 Water_deer_Abomasum-2__c238694 Roe_deer_Rectum-5__c1553 Water_buffalos_Cecum-1__c606851 Water_deer_Cecum-1__c360944 Water_deer_Colon-2__c223081 Water_buffalos_Rectum-4__c108853
VC442	4	7.561	45.37	268.2	0.1411	0.992931	Roe_deer_Cecum-2__c272973 Roe_deer_Cecum-4__c154310_1 Goat_Colon-3__c317951 Water_buffalos_Cecum-4__c836503
VC443	2	68.03	68.03	800.3	0.07799	0.979387	s9515.goat-hifiasm009678l Yak_Omasum-1__c141428
VC444	31	72.27	33600	38800	0.4638	1.1e-07	2022NBT-23962_1 2022NBT-36515 2022NBT-41641 2022NBT-54498 2022NBT-64313 2022NBT-71414 2022NBT-71514 2022NBT-764_2 2022NBT-7705_1 2022NBT-78209 2022NBT-81366 2022NBT-81705 Goat_Colon-2__c758463_1 Roe_deer_Rectum-2__c619951 Roe_deer_Rectum-3__c229078_1 Roe_deer_Rectum-4__c262779_1 2022NBT-70527 2022NBT-71976 Roe_deer_Rectum-1__c323372 Roe_deer_Rectum-2__c614953 2022NBT-5168_1 2022NBT-6624_1 2022NBT…
VC445	33	48.49	25600	25800	0.4973	8.96e-08	2022NBT-5206_1 Sheep_Cecum-4__c526359 Sheep_Colon-2__c607786 2022NBT-11933_1 2022NBT-101643 2022NBT-19431_1 2022NBT-25883_1 2022NBT-32503_1 2022NBT-38239_1 2022NBT-3884_1 2022NBT-40083_1 2022NBT-41061_1 2022NBT-4896_1 2022NBT-51964 2022NBT-52733 2022NBT-52870 2022NBT-582_1 2022NBT-62849 2022NBT-64506 2022NBT-64549 2022NBT-84644 Goat_Cecum-5__c447898 Goat_Jejunum-4__c216926 Goat_Jejunum-6__c88535 …
VC446	22	90.9	21000	26100	0.4459	2.23e-06	2022NBT-67344 2022NBT-75299 2022NBT-9973_1 Sheep_Rumen-3__c2328 Dairy_cattle_Duodenum-4__c291888_1 Goat_Cecum-3__c66507 Goat_Cecum-4__c412094 Goat_Omasum-3__c724037 Goat_Reticulum-3__c327544 Goat_Reticulum-5__c389578_1 Goat_Rumen-2__c19293 Goat_Rumen-5__c550267 Roe_deer_Jejunum-1__c221414 Roe_deer_Jejunum-1__c91 Sheep_Jejunum-1__c498 Water_deer_Cecum-3__c156737 flye-goat_5761_1 s15840.goat-hifias…
VC447	5	77.65	776.5	6317	0.1093	0.996692	2022NBT-69681_1 Roe_deer_Rectum-4__c134844 Sheep_Rectum-4__c808383_1 Yak_Cecum-2__c74244 Goat_Colon-4__c348440
VC448	3	144.2	432.5	729.6	0.3703	0.33126	Goat_Cecum-4__c360537_1 Dairy_cattle_Cecum-2__c349 Goat_Cecum-4__c30527
VC449	2	137.8	137.8	91.73	0.59	0.110336	2022NBT-80869 2022NBT-80694
VC450	15	92.22	9684	12200	0.4426	0.000390103	Goat_Cecum-3__c244650 Goat_Rectum-1__c13505 Water_deer_Cecum-2__c432625 Goat_Cecum-1__c601474_1 s7324.goat-hifiasm007467l 2022NBT-34269_1 2022NBT-82045 2022NBT-90983 2022NBT-810_1 Dairy_cattle_Duodenum-2__c481034 Roe_deer_Abomasum-5__c252 Water_deer_Rectum-3__c392216 Sheep_Duodenum-3__c151168 Sheep_Rectum-4__c527202_1 Yak_Colon-4__c498541
VC451	16	102.2	12300	12000	0.5051	2.16e-05	Sheep_Rumen-1__c316963 Water_buffalos_Rumen-3__c374020 Water_deer_Abomasum-5__c235018 Water_deer_Reticulum-5__c31275 flye-dairy_31170 flye-dairy_69248 s28476.dairy-hifiasm028479l Roe_deer_Rumen-1__c3883_1 Goat_Omasum-4__c314973 Roe_deer_Reticulum-2__c2777 Sheep_Omasum-2__c410974 Sheep_Rumen-3__c835407 contig_100162 contig_103093 flye-dairy_58190 Water_deer_Reticulum-3__c220504
VC452	13	77.75	6064	5193	0.5374	0.000135777	flye-dairy_72085 Sheep_Rumen-2__c2604 Roe_deer_Duodenum-2__c1276 Sheep_Reticulum-3__c65972 Sheep_Rumen-2__c630409 2022NBT-675_1 s17539.dairy-hifiasm017540l Sheep_Duodenum-2__c30468 Roe_deer_Jejunum-1__c297 Sheep_Duodenum-4__c164 Water_deer_Abomasum-2__c226 Water_deer_Ileum-2__c232 contig_78041
VC453	10	48.03	2161	856.7	0.7114	9.13e-05	Dairy_cattle_Jejunum-2__c1583238 Goat_Abomasum-5__c432491 Sheep_Duodenum-5__c8431 Sheep_Omasum-1__c33591 Sheep_Reticulum-3__c388514 Sheep_Reticulum-3__c398609 Water_buffalos_Omasum-1__c357769 flye-dairy_80810 flye-dairy_81108 flye-goat_21441
VC454	2	21.08	21.08	80.96	0.1988	0.658454	2022NBT-100608 Goat_Cecum-2__c578275
VC455	2	15.44	15.44	124.5	0.1073	0.979387	Roe_deer_Rectum-1__c279407_1 Water_buffalos_Colon-3__c31589
VC456	5	15.55	155.5	508.9	0.2306	0.952654	Sheep_Rectum-2__c586323 Water_deer_Cecum-3__c535278 Roe_deer_Rectum-4__c509144 Sheep_Rectum-1__c862672 Sheep_Rectum-2__c485642
VC457	5	176.8	1768	2780	0.3879	0.0183569	2022NBT-3214_1 Dairy_cattle_Colon-4__c598583 Dairy_cattle_Rectum-4__c28118 Roe_deer_Rectum-3__c1911 Water_deer_Rectum-4__c130855
VC458	2	104.4	104.4	2905	0.03465	0.979387	2022NBT-30210_1 2022NBT-91369
VC459	8	137.5	3851	8889	0.3019	0.864926	Dairy_cattle_Cecum-4__c512 Roe_deer_Rectum-2__c2045 Water_buffalos_Rectum-2__c305893 Water_deer_Cecum-2__c569486 Water_deer_Rectum-1__c217492 Water_deer_Rectum-3__c573098 Yak_Cecum-3__c718884 Yak_Colon-4__c72786
VC460	4	123	738	7896	0.0854	0.992931	Roe_deer_Rectum-3__c529926 2022NBT-84843 Goat_Rectum-1__c536439 Roe_deer_Rectum-1__c2699
VC461	3	157.4	472.3	993.1	0.321	0.5	s76177.dairy-hifiasm076189l flye-dairy_56139 s92882.dairy-hifiasm092897l
VC462	18	98.34	15100	37000	0.289	0.824677	Sheep_Duodenum-3__c251130 Yak_Duodenum-3__c453411 Sheep_Duodenum-5__c126648 Dairy_cattle_Duodenum-3__c837748 Roe_deer_Jejunum-3__c1089_1 Sheep_Duodenum-3__c703 Sheep_Jejunum-2__c189631 s38007.dairy-hifiasm038011l Sheep_Duodenum-5__c228 Dairy_cattle_Duodenum-3__c827 Yak_Rectum-1__c718606 Roe_deer_Cecum-1__c595875 Roe_deer_Reticulum-5__c144772_1 Water_buffalos_Reticulum-4__c150174 flye-dairy_75056 …
VC463	2	283.8	283.8	4205	0.06317	0.979387	s8404.dairy-hifiasm008405c s94696.dairy-hifiasm094712l
VC464	2	263.8	263.8	10700	0.0241	0.979387	Roe_deer_Colon-4__c2684 Roe_deer_Colon-5__c599
VC465	7	158.5	3328	23000	0.1262	0.999299	Sheep_Ileum-1__c217860 2022NBT-29611 2022NBT-36933 2022NBT-39974 2022NBT-44384 2022NBT-51235 s10722.goat-hifiasm010900l
VC466	4	48.35	290.1	17100	0.01671	0.992931	Sheep_Omasum-4__c663465 Goat_Ileum-3__c96124 Sheep_Rumen-5__c203127 Sheep_Ileum-1__c66060
VC467	2	94.32	94.32	3163	0.02892	0.979387	flye-dairy_32853 contig_172450
VC468	2	567	567	4434	0.1133	0.979387	2022NBT-25831 2022NBT-26775
VC469	35	152.2	90600	154000	0.3708	0.00268611	Water_buffalos_Cecum-4__c505147 Water_deer_Colon-1__c250497 Water_deer_Colon-4__c198129_1 2022NBT-5956_1 2022NBT-38545_1 2022NBT-42186 2022NBT-53924 2022NBT-54032 Roe_deer_Omasum-5__c2544 2022NBT-52628 Goat_Duodenum-3__c62144 Goat_Jejunum-2__c103153_1 Goat_Jejunum-3__c236622 Goat_Rumen-2__c677741 Roe_deer_Cecum-1__c45 Roe_deer_Duodenum-2__c876 Roe_deer_Jejunum-2__c400 Roe_deer_Rectum-2__c1396 Roe…
VC470	162	49	639000	575000	0.5264	0	2022NBT-2995_1 Goat_Colon-2__c91179_1 2022NBT-1015_1 2022NBT-10764_1 2022NBT-1141_1 2022NBT-13807_1 2022NBT-14784_1 2022NBT-15406_1 2022NBT-15687_1 2022NBT-16870_1 2022NBT-17961_1 2022NBT-18093_1 2022NBT-19631_1 2022NBT-1968_1 2022NBT-20237_1 2022NBT-2195_1 2022NBT-22640_1 2022NBT-22693_1 2022NBT-23065 2022NBT-23567_1 2022NBT-24201_1 2022NBT-24593_1 2022NBT-24865_1 2022NBT-27738_1 2022NBT-27982_1…
VC471	2	259.3	259.3	4365	0.05603	0.979387	2022NBT-1763_1 2022NBT-20473
VC472	2	146	146	1804	0.07469	0.979387	2022NBT-25259 2022NBT-31007
VC473	3	326.3	978.9	4220	0.1881	0.985452	Dairy_cattle_Cecum-2__c68936 Goat_Colon-1__c885456 Water_buffalos_Rectum-1__c512697
VC474	254	113.6	3650000	4060000	0.4733	0	s196.goat-hifiasm000199l flye-goat_11608 flye-goat_531 2022NBT-12 2022NBT-1231 2022NBT-1344 2022NBT-169 2022NBT-196 2022NBT-2629 2022NBT-311 2022NBT-329 2022NBT-358 2022NBT-374 2022NBT-3768 2022NBT-535 2022NBT-580 2022NBT-592 2022NBT-775 2022NBT-869 2022NBT-875 2022NBT-899 Goat_Rectum-6__c594561 Roe_deer_Colon-4__c2295 Water_deer_Rectum-3__c51449 flye-goat_16221 s249.goat-hifiasm000255l 2022NBT-2…
VC475	2	59.95	59.95	615.3	0.08826	0.979387	Sheep_Colon-3__c809594 Goat_Colon-1__c247589
VC476	18	160.9	24600	38900	0.3875	0.0176907	Water_deer_Rectum-4__c2056 2022NBT-15953 2022NBT-26607 2022NBT-5179 2022NBT-7160 2022NBT-6623 Water_deer_Cecum-1__c125688 Water_deer_Rumen-2__c170 Yak_Cecum-3__c7 Water_deer_Abomasum-5__c81 Yak_Cecum-2__c19 2022NBT-8224 Water_buffalos_Rectum-3__c32 Sheep_Colon-4__c217799 Sheep_Omasum-5__c591080 Sheep_Rumen-1__c719573 Goat_Omasum-2__c312465 Water_deer_Rectum-2__c186028
VC477	4	288.1	1729	7878	0.1798	0.969699	2022NBT-13141 2022NBT-17971 2022NBT-21354 2022NBT-28160
VC478	8	128.1	3588	3667	0.4935	0.0517809	Goat_Reticulum-5__c385507 Sheep_Rumen-4__c763166 Water_buffalos_Colon-3__c139206 Yak_Colon-3__c653233 Goat_Cecum-4__c578585_1 Sheep_Omasum-4__c123881 Sheep_Abomasum-4__c238582 Water_buffalos_Rumen-5__c919550
VC479	4	248.6	1492	8813	0.1446	0.992931	s72178.dairy-hifiasm072189l flye-dairy_63620 s58472.dairy-hifiasm058478l s2876.dairy-hifiasm002877l
VC480	6	45.12	676.8	3920	0.1469	0.998474	flye-goat_8388 flye-goat_15558 flye-goat_8387 flye-goat_6907 flye-goat_19870 flye-goat_12165
VC481	2	530.1	530.1	3603	0.1281	0.979387	2022NBT-15476 2022NBT-16557
VC482	3	161.6	484.9	11400	0.04084	0.985452	2022NBT-24049 2022NBT-26346 2022NBT-58513
VC483	6	93.24	1399	11300	0.11	0.998474	2022NBT-78727 2022NBT-22341 2022NBT-34531 2022NBT-43207_1 2022NBT-55071 Water_buffalos_Rectum-1__c897661
VC484	2	561.2	561.2	4260	0.1163	0.979387	Goat_Jejunum-3__c216770 flye-goat_20761
VC485	3	4.738	14.21	114.8	0.1053	0.985452	Goat_Rumen-5__c642334 Roe_deer_Rumen-1__c6534 Water_buffalos_Omasum-4__c592907
VC486	9	288.7	10400	21200	0.3289	0.701879	contig_30484 contig_117110 contig_53067 contig_66313 contig_69989 contig_87846 contig_90269 contig_37679 contig_139543
VC487	5	36.16	361.6	2596	0.1219	0.952654	contig_7385 contig_39016 contig_118921 contig_187646 contig_157983
VC488	3	21.96	65.89	1058	0.05831	0.985452	Sheep_Rectum-5__c509943 Water_deer_Abomasum-2__c238694 s12914.dairy-hifiasm012915l
VC489	3	68.49	205.5	614.2	0.2489	0.959572	Goat_Cecum-4__c98162_1 Roe_deer_Cecum-2__c2189 2022NBT-91785
VC490	2	10.89	10.89	258.1	0.03988	0.979387	2022NBT-26778 2022NBT-29568
VC491	2	17.65	17.65	374.8	0.04454	0.979387	2022NBT-37001 2022NBT-63575
VC492	5	144.4	1444	15200	0.08694	0.996692	2022NBT-41189 2022NBT-43882 Water_deer_Colon-3__c432192 Goat_Ileum-1__c208430_1 2022NBT-42916
VC493	30	113	49200	24600	0.666	0	2022NBT-109608 2022NBT-100944 2022NBT-156_1 2022NBT-2858_1 2022NBT-3508_1 2022NBT-37589 2022NBT-37708_1 2022NBT-44520 2022NBT-60719 2022NBT-75186 2022NBT-78819 Goat_Cecum-4__c565535 Goat_Colon-1__c729447 Goat_Duodenum-2__c119838_1 Goat_Omasum-5__c413431 Goat_Rectum-5__c493870 Goat_Reticulum-5__c594581 Goat_Rumen-5__c178247 Roe_deer_Cecum-1__c590977 Roe_deer_Cecum-2__c2399 Roe_deer_Colon-2__c32940…
VC494	11	134.1	7378	11700	0.3873	0.0329855	2022NBT-11259_1 2022NBT-76288 Roe_deer_Rectum-3__c536 Roe_deer_Rectum-4__c281785_1 Sheep_Rumen-5__c1001926 Water_deer_Cecum-2__c500265_1 Roe_deer_Colon-3__c3358 Roe_deer_Rectum-2__c1537_1 Roe_deer_Colon-4__c158968 Sheep_Cecum-3__c637397 Water_deer_Colon-4__c155012_1
VC495	6	212.5	3188	8806	0.2655	0.953652	2022NBT-20114 2022NBT-44910_1 2022NBT-923_1 Water_deer_Rectum-1__c170283 flye-goat_18204_1 Water_buffalos_Rectum-1__c836946
VC496	8	50.79	1422	6719	0.1743	0.813985	2022NBT-2858_1 Roe_deer_Cecum-1__c64494 Roe_deer_Cecum-4__c158222 Goat_Cecum-3__c194972 Roe_deer_Colon-2__c1159 2022NBT-71880 Goat_Cecum-4__c153256 Goat_Rectum-5__c450524
VC497	7	194.8	4092	9684	0.2967	0.937399	2022NBT-36266 2022NBT-76964 2022NBT-83511 Roe_deer_Colon-5__c1461 Roe_deer_Jejunum-3__c1350_1 Roe_deer_Rumen-5__c296252_1 Water_deer_Cecum-1__c93484_1
VC498	3	230.9	692.8	7563	0.08385	0.985452	2022NBT-37708_1 2022NBT-44520 2022NBT-60719
VC499	10	90.04	4052	6015	0.4017	0.00141364	Goat_Rumen-3__c523654 Roe_deer_Cecum-1__c140391 Roe_deer_Rectum-1__c577071_1 Water_deer_Rectum-1__c341002 Yak_Rectum-1__c611480 s623.goat-hifiasm000645c_1 s641.goat-hifiasm000665l Roe_deer_Reticulum-5__c1242 Sheep_Rumen-5__c4307 flye-dairy_23299
VC500	14	26.21	2385	11900	0.1672	0.999568	2022NBT-68264 Goat_Rectum-4__c121794 Goat_Rectum-4__c721738 Roe_deer_Cecum-3__c1181 Roe_deer_Reticulum-5__c263 Sheep_Colon-4__c33775 Sheep_Duodenum-2__c36711 Sheep_Duodenum-5__c30839 Goat_Ileum-1__c104458 Roe_deer_Jejunum-1__c400 Sheep_Omasum-1__c8473 Roe_deer_Jejunum-3__c1421 Roe_deer_Omasum-3__c1044 Sheep_Omasum-4__c573883
VC501	6	119.8	1796	4094	0.3044	0.885117	flye-dairy_57947 Yak_Omasum-5__c670729 Sheep_Rumen-5__c493190 flye-dairy_65873 flye-dairy_80629 flye-dairy_81163
VC502	2	186.8	186.8	3014	0.05829	0.979387	2022NBT-13570 2022NBT-50016
VC503	2	41.54	41.54	110.6	0.2661	0.979387	Roe_deer_Duodenum-2__c408 Roe_deer_Omasum-3__c1272
VC504	3	38.69	116.1	3792	0.02965	0.985452	Sheep_Rumen-3__c405169 Water_deer_Omasum-3__c235186 Sheep_Omasum-2__c692083
VC505	3	21.36	64.08	1851	0.03336	0.985452	flye-goat_20402 Goat_Rumen-3__c188467 contig_69376
VC506	5	136.4	1364	9432	0.1262	0.996692	2022NBT-10107_1 Dairy_cattle_Colon-3__c540705 Dairy_cattle_Rectum-3__c756720 Water_deer_Rectum-3__c57860 Yak_Colon-3__c637578
VC507	8	187.8	5259	7743	0.404	0.0260148	2022NBT-13424_1 2022NBT-49933_1 2022NBT-59642 2022NBT-59755 Dairy_cattle_Colon-4__c274358 Goat_Rectum-2__c1365 Sheep_Rectum-1__c350629 Water_deer_Rectum-1__c388676
VC508	65	27.74	57700	43400	0.5702	0	2022NBT-10107_1 2022NBT-13424_1 2022NBT-18024_1 2022NBT-18370_1 2022NBT-1884_1 2022NBT-3372_1 2022NBT-48716_1 2022NBT-49933_1 2022NBT-56991 2022NBT-57628 2022NBT-58740 2022NBT-59003 2022NBT-59642 2022NBT-59755 2022NBT-60367 2022NBT-64608 2022NBT-68423 2022NBT-71142 Dairy_cattle_Cecum-4__c193028 Dairy_cattle_Cecum-4__c874822 Dairy_cattle_Colon-3__c456758 Dairy_cattle_Colon-3__c540705 Dairy_cattle_…
VC509	17	16.44	2236	12900	0.1478	0.999466	2022NBT-27508_1 2022NBT-66800 s63111.dairy-hifiasm063117l 2022NBT-59142 Goat_Rumen-2__c283090 Sheep_Omasum-3__c89017 Yak_Jejunum-5__c289439 Yak_Rectum-1__c921650 contig_114980 flye-dairy_81284 s47319.dairy-hifiasm047324c s87923.dairy-hifiasm087938l 2022NBT-67241 2022NBT-59602 Dairy_cattle_Rectum-4__c316267 Goat_Rumen-5__c2717 Sheep_Duodenum-3__c558695_1
VC510	56	23.6	36400	27300	0.5706	0	2022NBT-27508_1 Yak_Cecum-1__c579114 Dairy_cattle_Colon-5__c894945 Water_buffalos_Rectum-2__c450865 flye-dairy_67552 Goat_Rectum-1__c526_1 2022NBT-47571 contig_182392 Goat_Cecum-1__c340540 Sheep_Duodenum-3__c173855 Water_buffalos_Cecum-4__c23718_1 s17146.dairy-hifiasm017147c Yak_Rectum-5__c918054 2022NBT-14263_1 2022NBT-47276 2022NBT-60750 2022NBT-63614_1 2022NBT-68210 2022NBT-89520 2022NBT-89575…
VC511	4	288.6	1732	2141	0.4463	0.156161	2022NBT-28564 2022NBT-30658 2022NBT-14463_1 2022NBT-40684
VC512	9	116.4	4189	3652	0.5331	0.00133986	2022NBT-28564 2022NBT-32443_1 2022NBT-5600_1 2022NBT-34852_1 2022NBT-29271_1 2022NBT-30658 2022NBT-45289 2022NBT-14463_1 2022NBT-40684
VC513	3	248.6	745.9	4031	0.156	0.985452	2022NBT-59003 2022NBT-64608 2022NBT-71142
VC514	3	153.9	461.7	635	0.4187	0.33126	2022NBT-1895_1 2022NBT-12928_1 2022NBT-73365
VC515	3	173.1	519.3	1556	0.2496	0.808633	2022NBT-55126 2022NBT-64575 2022NBT-56760
VC516	2	158.2	158.2	857.3	0.1551	0.979387	2022NBT-46435 2022NBT-38460
VC517	57	61.9	98800	41600	0.7034	0	Dairy_cattle_Colon-3__c205442 2022NBT-10592_1 2022NBT-10648_1 2022NBT-20479_1 2022NBT-40893 2022NBT-43456 2022NBT-43646 2022NBT-43746 2022NBT-44632 Dairy_cattle_Duodenum-1__c156347 Dairy_cattle_Duodenum-3__c348558 Dairy_cattle_Jejunum-1__c360977 Dairy_cattle_Jejunum-6__c244 Dairy_cattle_Rectum-4__c860096 Roe_deer_Cecum-5__c6554 Sheep_Rumen-3__c1120540_1 Sheep_Rumen-3__c956954 Yak_Cecum-1__c359956…
VC518	3	215.7	647	7826	0.07631	0.985452	2022NBT-60367 Dairy_cattle_Cecum-4__c874822 Goat_Rectum-5__c352860
VC519	13	50.68	3953	14000	0.2196	0.998532	2022NBT-65801 Yak_Colon-3__c69088 Yak_Rectum-5__c11295 Yak_Rectum-5__c524590 2022NBT-63713 Roe_deer_Rectum-4__c61202 Water_buffalos_Colon-5__c550554 Water_deer_Cecum-2__c379390 Water_deer_Cecum-2__c497929 Yak_Cecum-5__c313533 2022NBT-46326 2022NBT-45898 2022NBT-16438_1
VC520	2	133.6	133.6	724.4	0.155	0.979387	2022NBT-66800 2022NBT-67241
VC521	18	51.62	7898	20700	0.2756	0.967905	Dairy_cattle_Duodenum-3__c751857 Dairy_cattle_Rumen-1__c1621929 Sheep_Duodenum-3__c64779 Sheep_Rumen-2__c60069 Water_buffalos_Omasum-1__c93947 Water_buffalos_Omasum-4__c791738 Water_buffalos_Rumen-1__c730846 Water_buffalos_Rumen-5__c2306955 Yak_Rumen-5__c2019915 flye-dairy_79217 s13058.dairy-hifiasm013059c s22747.dairy-hifiasm022749l s49653.dairy-hifiasm049658l s75710.dairy-hifiasm075722l s9508.d…
VC522	3	264.7	794	3154	0.2008	0.985452	Dairy_cattle_Colon-3__c456758 Roe_deer_Rectum-2__c131 Sheep_Rectum-2__c46453
VC523	5	42.3	423	4613	0.08383	0.928164	Sheep_Rectum-2__c849484 Sheep_Rectum-3__c302021 2022NBT-52100 Sheep_Rectum-1__c1069213 Roe_deer_Rectum-2__c235028
VC524	4	187.7	1126	4695	0.1932	0.992931	Sheep_Rectum-2__c574218 Sheep_Rectum-3__c137444 Sheep_Rectum-1__c859167 Yak_Rectum-2__c272740
VC525	3	176.5	529.4	2645	0.1665	0.985452	Dairy_cattle_Reticulum-2__c219432 Goat_Abomasum-5__c230996_1 Goat_Reticulum-2__c498181
VC526	29	53.18	21600	25000	0.4632	1.05e-06	Roe_deer_Colon-3__c378428 Water_buffalos_Rectum-4__c107325 2022NBT-1654_1 2022NBT-66909 Dairy_cattle_Rectum-1__c85 Dairy_cattle_Rumen-5__c313 Roe_deer_Abomasum-3__c48954 Roe_deer_Rumen-5__c245154 Sheep_Abomasum-1__c65568 Sheep_Abomasum-4__c612633 Sheep_Omasum-2__c778581 Water_buffalos_Rumen-4__c1090767 Yak_Rumen-4__c101169 Sheep_Rumen-5__c1273882 contig_133961 s21634.goat-hifiasm021892l_1 s473.go…
VC527	20	41.19	7826	8101	0.4901	5.19e-05	Roe_deer_Rectum-3__c2140 2022NBT-61694 Yak_Cecum-3__c750482 Yak_Colon-4__c567674 2022NBT-65812 2022NBT-76470 2022NBT-8887_1 Yak_Jejunum-5__c38655 Yak_Rectum-3__c70041 Yak_Rectum-4__c526897 s12278.dairy-hifiasm012279l 2022NBT-28621_1 2022NBT-28787 2022NBT-62871 2022NBT-8793_1 Roe_deer_Rectum-1__c1290 Yak_Rectum-1__c846886 2022NBT-86120 Yak_Rumen-3__c10476 Dairy_cattle_Cecum-2__c1205856
VC528	79	65.16	201000	192000	0.5111	0	Roe_deer_Rectum-3__c355778 2022NBT-39052 2022NBT-76550 Dairy_cattle_Cecum-4__c667876 Dairy_cattle_Cecum-4__c681138 Dairy_cattle_Colon-3__c347045 Dairy_cattle_Colon-5__c403002 Dairy_cattle_Colon-5__c526341 Dairy_cattle_Rectum-1__c119 Dairy_cattle_Rectum-1__c12764 Dairy_cattle_Rectum-4__c796103 Dairy_cattle_Rectum-5__c404629 Roe_deer_Cecum-3__c368591 Roe_deer_Rectum-2__c536483 Sheep_Colon-5__c46660…
VC529	3	305.8	917.4	10300	0.08204	0.985452	2022NBT-31067 2022NBT-31448 2022NBT-31767
VC530	4	31.74	190.4	2605	0.06792	0.992931	Sheep_Rumen-1__c832414 s27161.dairy-hifiasm027163c flye-dairy_70939_1 contig_80233
VC531	2	193.1	193.1	2653	0.06775	0.979387	Sheep_Rumen-2__c60069 s75710.dairy-hifiasm075722l
VC532	9	240.1	8642	1107	0.8848	0.00020473	Water_buffalos_Rumen-1__c730846 Sheep_Rectum-1__c41007 Dairy_cattle_Cecum-4__c149096 2022NBT-51568 Dairy_cattle_Rectum-4__c112214 Roe_deer_Cecum-1__c2252 Water_deer_Colon-5__c153740 Water_deer_Rectum-4__c104734 Water_deer_Rectum-4__c201552_1
VC533	7	53.51	1124	8412	0.1177	0.999299	Water_deer_Rectum-3__c399181 Goat_Cecum-4__c726757 Sheep_Rectum-5__c435275 Yak_Cecum-3__c5884 2022NBT-69191 2022NBT-69499 2022NBT-62405_1
VC534	3	107.2	321.6	2691	0.1065	0.985452	Yak_Jejunum-5__c289439 contig_114980 s87923.dairy-hifiasm087938l
VC535	3	29.78	89.34	645	0.1207	0.985452	contig_75640 contig_168397 Goat_Omasum-3__c259952
VC536	5	270.2	2702	11600	0.1893	0.996692	flye-dairy_16610 flye-dairy_46897 flye-dairy_75861 s52125.dairy-hifiasm052130l s63539.dairy-hifiasm063545c
VC537	11	14.2	781	2148	0.2646	0.881391	2022NBT-117428 2022NBT-120573 Roe_deer_Cecum-2__c225472 Roe_deer_Cecum-2__c370018 Roe_deer_Cecum-4__c245144 Roe_deer_Omasum-2__c90444 Roe_deer_Rumen-4__c134379 Yak_Cecum-2__c634242 2022NBT-114508 Sheep_Cecum-5__c239282 Water_buffalos_Rumen-4__c1877308
VC538	2	141.9	141.9	637.7	0.1811	0.979387	2022NBT-20398 2022NBT-2973_2
VC539	3	74.16	222.5	2212	0.09117	0.985452	2022NBT-26097_1 2022NBT-49413 s692.goat-hifiasm000719l_1
VC540	9	19.65	707.2	1477	0.3211	0.535182	Roe_deer_Cecum-2__c15843 2022NBT-120573 2022NBT-126720 Goat_Cecum-6__c456737 Roe_deer_Cecum-2__c225472 2022NBT-114508 Goat_Cecum-1__c99239 Roe_deer_Colon-2__c36797 Water_deer_Colon-5__c192240
VC541	4	54.3	325.8	6194	0.04991	0.992931	Roe_deer_Colon-2__c544226 Water_deer_Cecum-2__c176430 Goat_Cecum-6__c616533 Roe_deer_Cecum-1__c405527
VC542	3	53.34	160	149.5	0.5071	0.33126	Roe_deer_Colon-4__c470734 2022NBT-29013 Sheep_Colon-3__c786176
VC543	2	381.2	381.2	2078	0.1547	0.979387	2022NBT-10122 2022NBT-13636
VC544	34	181.4	102000	59800	0.6295	0	2022NBT-18296_1 2022NBT-34921 2022NBT-35037 2022NBT-7594_1 Roe_deer_Cecum-1__c31 2022NBT-1312_1 2022NBT-19827_1 2022NBT-25966_1 2022NBT-55048 2022NBT-64035 Goat_Jejunum-2__c267690 Goat_Jejunum-2__c50750_1 Goat_Reticulum-4__c181975_1 Sheep_Colon-4__c19281 Sheep_Ileum-1__c170123_1 Sheep_Rectum-3__c1244733_1 Sheep_Rectum-4__c53825 Water_buffalos_Rumen-4__c1102668 Water_buffalos_Rumen-4__c5597_1 Yak_…
VC545	2	26.87	26.87	1162	0.02252	0.979387	Goat_Reticulum-6__c254965 Water_buffalos_Cecum-4__c229904
VC546	3	95.36	286.1	1069	0.2101	0.985452	2022NBT-66921 Yak_Rumen-1__c298806 flye-dairy_54953_1
VC547	12	94.85	6260	4870	0.5612	0.000676971	Goat_Cecum-6__c838771 2022NBT-4178_1 Yak_Rectum-4__c544495 2022NBT-204_2 2022NBT-40583_1 Water_buffalos_Cecum-5__c313012_1 Water_buffalos_Cecum-5__c444035 Water_buffalos_Colon-2__c605800 Water_buffalos_Colon-2__c612602 Water_buffalos_Rectum-2__c65377 Water_buffalos_Rumen-4__c1224664 Yak_Rectum-2__c81768
VC548	39	44.7	33100	18900	0.6356	0	2022NBT-101271 2022NBT-2998_1 2022NBT-3286_1 2022NBT-3827_1 2022NBT-57178 2022NBT-57993_1 2022NBT-63735 2022NBT-72537_1 2022NBT-9690_1 Dairy_cattle_Jejunum-1__c627152 Dairy_cattle_Jejunum-1__c99839 Dairy_cattle_Rumen-3__c40447 Goat_Cecum-3__c712993_1 Goat_Cecum-5__c183166_1 Goat_Colon-5__c230187 Goat_Ileum-2__c89608 Goat_Jejunum-1__c398123 Goat_Rumen-1__c2250 Goat_Rumen-3__c235902 Roe_deer_Cecum-…
VC549	2	598.9	598.9	608.7	0.4943	0.110336	2022NBT-15144_1 2022NBT-17789_1
VC550	3	236.6	709.9	4350	0.1401	0.985452	2022NBT-72537_1 Goat_Cecum-5__c183166_1 Goat_Colon-5__c230187
VC551	3	181.4	544.1	334.6	0.615	0.0404278	2022NBT-46691 2022NBT-67144 Water_buffalos_Rectum-4__c186988
VC552	8	53.05	1486	6775	0.1795	0.993206	Dairy_cattle_Colon-3__c292812 2022NBT-76125 2022NBT-82104 2022NBT-92735 Dairy_cattle_Cecum-3__c501838 Roe_deer_Colon-1__c786439_1 Roe_deer_Colon-4__c109466 Water_deer_Cecum-2__c195198
VC553	2	236	236	2948	0.07404	0.979387	Dairy_cattle_Jejunum-1__c627152 Goat_Jejunum-1__c398123
VC554	4	134.9	809.4	5962	0.1194	0.992931	Dairy_cattle_Jejunum-1__c99839 Dairy_cattle_Rumen-3__c40447 Sheep_Rumen-2__c1169967 s61847.dairy-hifiasm061853l
VC555	7	126.7	2660	9871	0.2121	0.994698	Roe_deer_Jejunum-2__c330 Sheep_Ileum-3__c188536 Sheep_Ileum-5__c123 Sheep_Jejunum-2__c379 s77957.dairy-hifiasm077970l Sheep_Jejunum-2__c803 Yak_Jejunum-5__c25116
VC556	25	82.24	24700	26500	0.4821	2.05e-07	flye-dairy_26719 Yak_Duodenum-3__c379438 Dairy_cattle_Jejunum-6__c89623 Yak_Duodenum-3__c300269 Yak_Jejunum-5__c256886 Sheep_Jejunum-2__c803 Yak_Jejunum-5__c25116 Yak_Duodenum-1__c378380 Sheep_Ileum-1__c222667 s13983.dairy-hifiasm013984l Dairy_cattle_Duodenum-1__c387491 Dairy_cattle_Duodenum-6__c223721 Dairy_cattle_Jejunum-1__c401376 Dairy_cattle_Jejunum-1__c507357 Dairy_cattle_Jejunum-6__c70784 …
VC557	4	109.1	654.6	4524	0.1262	0.557383	Sheep_Jejunum-5__c34 Roe_deer_Omasum-1__c459_1 s41717.dairy-hifiasm041722l Goat_Rumen-1__c213539
VC558	3	182.3	546.9	1760	0.2365	0.985452	Yak_Jejunum-5__c374484 Yak_Jejunum-5__c162739 flye-dairy_19250
VC559	24	50.81	14000	20300	0.4074	0.00727422	2022NBT-77688 Dairy_cattle_Duodenum-1__c86928 Sheep_Duodenum-4__c475 Sheep_Ileum-3__c60880 Sheep_Ileum-4__c15836 Sheep_Ileum-4__c781 Sheep_Ileum-5__c1361 Sheep_Jejunum-2__c791 Sheep_Jejunum-4__c501 Sheep_Jejunum-5__c132 Yak_Duodenum-3__c99514 flye-dairy_23446 flye-dairy_23447 flye-dairy_36512 flye-dairy_53343 flye-dairy_57819 flye-dairy_63774 s38259.dairy-hifiasm038264l s46845.dairy-hifiasm046850…
VC560	20	184	35000	56300	0.383	0.00571641	Water_buffalos_Rectum-3__c3 2022NBT-25634 2022NBT-43522 Goat_Colon-6__c677 Roe_deer_Colon-2__c1595 Sheep_Colon-1__c260 Sheep_Colon-2__c352464 Sheep_Colon-5__c248109 Sheep_Colon-5__c565147 Water_buffalos_Cecum-4__c287493 Water_buffalos_Colon-5__c770496 Water_deer_Cecum-3__c400401 Yak_Cecum-5__c209882 Yak_Colon-3__c125015 Yak_Rectum-2__c298823 Yak_Rectum-4__c578414 Sheep_Colon-2__c382585 Roe_deer_C…
VC561	52	299.6	397000	886000	0.3096	0.309474	2022NBT-169 2022NBT-775 2022NBT-869 2022NBT-1205 2022NBT-1416 2022NBT-1606 2022NBT-1752 2022NBT-2087 2022NBT-4202 2022NBT-4684 2022NBT-481 2022NBT-898 Dairy_cattle_Colon-5__c48 Goat_Cecum-4__c252877 Roe_deer_Rectum-2__c2918 2022NBT-1258 2022NBT-14124 2022NBT-2014 2022NBT-2055 2022NBT-21186 2022NBT-2567 2022NBT-3071 2022NBT-4226 2022NBT-4946 2022NBT-5996 2022NBT-6716 2022NBT-7666 2022NBT-7713 2022…
VC562	2	180.4	180.4	312	0.3634	0.110336	2022NBT-16064_1 2022NBT-17355_1
VC563	23	247.6	62600	221000	0.2206	0.947995	2022NBT-4202 Goat_Cecum-4__c252877 2022NBT-13868 2022NBT-16276 2022NBT-21186 2022NBT-44145 2022NBT-4946 2022NBT-7666 2022NBT-7713 Dairy_cattle_Rectum-5__c147942 Goat_Cecum-4__c363 Goat_Cecum-4__c536448 Goat_Colon-1__c709773 Goat_Colon-2__c381460 Goat_Colon-5__c42958 Water_buffalos_Cecum-4__c653101 2022NBT-23866 Roe_deer_Rectum-5__c1335 Sheep_Rectum-1__c872270 Water_buffalos_Cecum-5__c1035997 Wate…
VC564	4	600	3600	46200	0.07227	0.995529	2022NBT-11525 2022NBT-12423 2022NBT-6563 2022NBT-9738
VC565	31	252	117000	915000	0.1135	1	2022NBT-2629 2022NBT-311 2022NBT-535 2022NBT-592 2022NBT-899 2022NBT-1070 2022NBT-1243 2022NBT-1431 2022NBT-167 2022NBT-1691 2022NBT-462 2022NBT-4962 2022NBT-498 2022NBT-509 2022NBT-714 2022NBT-881 2022NBT-930 Goat_Omasum-4__c304237 Goat_Omasum-6__c469633 Roe_deer_Reticulum-3__c1492 Water_buffalos_Rumen-1__c261753 Yak_Rumen-2__c1561394 contig_26070 flye-dairy_35403 flye-goat_4186 s2006.goat-hifia…
VC566	13	141.3	11000	86100	0.1135	0.99999	2022NBT-24182 2022NBT-6836 Goat_Colon-3__c662419 Goat_Rectum-3__c163 Goat_Rectum-3__c726 Roe_deer_Rectum-1__c80051 Water_buffalos_Cecum-4__c34490 Water_buffalos_Colon-4__c35895 Yak_Rectum-1__c110 Yak_Rectum-2__c238980 Yak_Rectum-5__c90839 Water_deer_Rectum-4__c58678 Goat_Rectum-6__c130006
VC567	7	162.4	3410	25600	0.1177	0.999299	Dairy_cattle_Colon-5__c798 Goat_Colon-1__c490564 Goat_Rectum-4__c382483 Water_buffalos_Rectum-3__c217832 Yak_Rectum-1__c887732 Water_buffalos_Cecum-2__c456622 Water_buffalos_Rectum-3__c144783
VC568	11	174.7	9610	9069	0.5139	5.35e-05	Goat_Omasum-5__c550368 Sheep_Colon-4__c365531_1 Sheep_Ileum-5__c55237_1 Sheep_Reticulum-4__c787431 Water_buffalos_Rumen-5__c2394133_1 Water_deer_Cecum-3__c114311 Roe_deer_Colon-1__c1740_1 Roe_deer_Rectum-1__c381384_1 Sheep_Rectum-5__c418 Water_buffalos_Cecum-5__c146366 Water_buffalos_Reticulum-5__c1141710_1
VC569	83	210.7	717000	1400000	0.3395	0.0318829	2022NBT-1344 2022NBT-169 2022NBT-329 2022NBT-775 2022NBT-869 Goat_Rectum-6__c594561 2022NBT-2148 2022NBT-1205 2022NBT-122 2022NBT-1416 2022NBT-1453 2022NBT-1466 2022NBT-149 2022NBT-1606 2022NBT-1752 2022NBT-2 2022NBT-2069 2022NBT-2087 2022NBT-2092 2022NBT-2151 2022NBT-2306 2022NBT-24 2022NBT-2539 2022NBT-2733 2022NBT-2756 2022NBT-3103 2022NBT-4202 2022NBT-4233 2022NBT-4282 2022NBT-4684 2022NBT-46…
VC570	4	14.2	85.21	1334	0.05969	0.992931	Roe_deer_Cecum-1__c752 Roe_deer_Colon-1__c479203 flye-goat_18862 Roe_deer_Rectum-1__c280277
VC571	2	66.87	66.87	840.2	0.0734	0.979387	Roe_deer_Cecum-4__c285277 Yak_Rectum-4__c866870
VC572	3	79.66	239	1579	0.131	0.985452	Sheep_Rumen-3__c1223818 Water_buffalos_Rumen-1__c382350 Yak_Rumen-2__c1774745
VC573	9	91.32	3287	2932	0.5271	0.000543124	Roe_deer_Rectum-2__c574 Roe_deer_Rumen-5__c341140 Roe_deer_Omasum-3__c2523_1 Water_buffalos_Colon-5__c409662_1 Yak_Duodenum-3__c107 flye-dairy_64570 flye-dairy_78344 Roe_deer_Cecum-1__c110574_1 Water_buffalos_Cecum-5__c690439_1
VC574	3	147.4	442.1	6180	0.0667	0.985452	Water_buffalos_Cecum-5__c66 Yak_Rumen-4__c1839969 Yak_Rumen-5__c1263095
VC575	2	107.4	107.4	2520	0.04082	0.979387	Water_buffalos_Rumen-5__c1088148 Yak_Rumen-5__c2087195
VC576	3	343.9	1032	4279	0.194	0.959572	Yak_Omasum-4__c116 Goat_Abomasum-4__c233788 Goat_Abomasum-3__c21967
VC577	27	433.1	152000	49100	0.7556	0	flye-dairy_31690 flye-dairy_48480 Roe_deer_Rumen-5__c4791 Sheep_Jejunum-5__c179 flye-dairy_41761 flye-dairy_7527 flye-goat_8711 s1490.goat-hifiasm001543l s191.goat-hifiasm000194c s285.goat-hifiasm000292c flye-goat_5723 Water_buffalos_Cecum-1__c596436 Sheep_Jejunum-1__c676 Sheep_Duodenum-4__c791 Sheep_Omasum-5__c636361 s464.dairy-hifiasm000465l s1187.goat-hifiasm001233l Sheep_Rumen-1__c1054619 Goa…
VC578	66	20.28	43500	23200	0.6509	0	2022NBT-123730 2022NBT-101408 Dairy_cattle_Duodenum-3__c342576 Dairy_cattle_Jejunum-1__c328088 Dairy_cattle_Jejunum-6__c169348 Dairy_cattle_Rumen-4__c1200160 Goat_Duodenum-1__c323061 Goat_Duodenum-3__c81636 Goat_Ileum-2__c105106 Goat_Ileum-6__c21542 Goat_Ileum-6__c56816 Goat_Jejunum-5__c70316 Goat_Jejunum-6__c46990 Goat_Rumen-4__c619532 Roe_deer_Abomasum-4__c41755 Roe_deer_Duodenum-2__c121374 Roe…
VC579	33	34.87	18400	25700	0.4168	0.000105102	Dairy_cattle_Abomasum-2__c201747 Dairy_cattle_Duodenum-1__c142120 Dairy_cattle_Duodenum-3__c187444 Dairy_cattle_Duodenum-3__c365177 Dairy_cattle_Duodenum-6__c162217 Goat_Abomasum-6__c571111 Goat_Duodenum-1__c183610 Goat_Duodenum-1__c444 Goat_Ileum-2__c109031 Goat_Omasum-1__c173924 Goat_Rumen-5__c684418 Goat_Rumen-6__c500988 Roe_deer_Reticulum-1__c1642 Sheep_Duodenum-3__c106568 Sheep_Duodenum-3__c…
VC580	2	118.2	118.2	2499	0.04507	0.979387	Sheep_Abomasum-4__c220417 Yak_Duodenum-3__c434250
VC581	2	72.7	72.7	2966	0.02389	0.979387	2022NBT-37289_1 Roe_deer_Colon-4__c2279
VC582	2	84.88	84.88	4932	0.01691	0.979387	2022NBT-16120_1 2022NBT-38358
VC583	2	600	600	3328	0.1526	0.979387	2022NBT-21145 2022NBT-25336_1
VC584	128	36.63	298000	339000	0.4675	0	Water_buffalos_Rectum-1__c812227 Sheep_Rectum-3__c436549 2022NBT-10680 2022NBT-1014_1 2022NBT-11465_1 2022NBT-1196_1 2022NBT-24444_1 2022NBT-28228_2 2022NBT-31067 2022NBT-31767 2022NBT-46735_1 2022NBT-48347 2022NBT-48474 2022NBT-49350_1 2022NBT-58029 2022NBT-58036 2022NBT-58753 2022NBT-59282 2022NBT-59394 2022NBT-61395 2022NBT-61410 2022NBT-62332 2022NBT-62648 2022NBT-63159 2022NBT-63178 2022NBT-…
VC585	7	48.26	1013	1086	0.4796	0.0204568	2022NBT-460_1 2022NBT-73219 2022NBT-110_1 Roe_deer_Rectum-2__c45187 Water_deer_Cecum-3__c464035_1 Roe_deer_Rectum-4__c1300 Roe_deer_Rectum-4__c654
VC586	2	271.2	271.2	2365	0.1027	0.979387	2022NBT-33644 2022NBT-33895
VC587	4	99.91	599.5	9308	0.06046	0.992931	2022NBT-33644 2022NBT-33895 2022NBT-37676 2022NBT-37831
VC588	5	82.87	828.7	2950	0.2187	0.969949	flye-dairy_36812 s33897.dairy-hifiasm033901l contig_59185 flye-dairy_79433 s49869.dairy-hifiasm049874l
VC589	11	55.06	3028	3420	0.4681	0.00126141	Roe_deer_Rectum-1__c305 2022NBT-59157 2022NBT-11498_1 2022NBT-12352_1 2022NBT-59483 2022NBT-87338 Dairy_cattle_Cecum-2__c896664 2022NBT-26613 2022NBT-4096_1 2022NBT-8491_1 Dairy_cattle_Rectum-1__c158294
VC590	3	182.1	546.4	567.5	0.4879	0.0952151	Sheep_Duodenum-2__c201117 2022NBT-65139 Water_deer_Rectum-4__c3153
VC591	3	271.5	814.5	1519	0.3482	0.33126	Sheep_Abomasum-4__c566271 Yak_Rumen-5__c535493 Water_buffalos_Abomasum-1__c355411
VC592	2	193.8	193.8	3698	0.04975	0.979387	2022NBT-62274 2022NBT-63294
VC593	5	39.6	396	1551	0.2023	0.996692	2022NBT-28006 2022NBT-66161 Goat_Rectum-6__c350_1 Goat_Cecum-2__c102953_1 Roe_deer_Colon-2__c932
VC594	3	69.92	209.8	3509	0.05632	0.808633	2022NBT-63359 2022NBT-63032 2022NBT-90315
VC595	9	74.48	2681	3178	0.4562	0.0260294	2022NBT-1237_1 2022NBT-102869 2022NBT-68277 2022NBT-69644 2022NBT-71762 Dairy_cattle_Rectum-3__c551806_1 Goat_Cecum-3__c520291_1 Roe_deer_Cecum-3__c284702 Roe_deer_Rectum-4__c465110_1
VC596	3	136.6	409.8	944.2	0.3013	0.808633	s30733.dairy-hifiasm030736l s62160.dairy-hifiasm062166l Sheep_Duodenum-5__c146098
VC597	2	398.6	398.6	2002	0.1658	0.979387	2022NBT-12516_1 2022NBT-59490
VC598	14	54.4	4950	18100	0.2143	0.999984	Roe_deer_Cecum-1__c399055 Sheep_Cecum-2__c625067_1 Yak_Rectum-1__c218712 Roe_deer_Rectum-2__c258635 2022NBT-1300_1 2022NBT-77802 2022NBT-8493_1 Dairy_cattle_Cecum-3__c501838 Goat_Rectum-3__c748296 Roe_deer_Colon-1__c786439_1 Roe_deer_Colon-4__c109466 Sheep_Colon-2__c37_1 Water_deer_Cecum-2__c195198 Water_deer_Rectum-4__c271666_1
VC599	7	109.2	2293	7857	0.2256	0.963181	Roe_deer_Rectum-1__c644570 Roe_deer_Rectum-4__c378034 Water_deer_Rectum-1__c104441 Dairy_cattle_Colon-5__c147473 Dairy_cattle_Cecum-4__c495 Dairy_cattle_Colon-4__c463370 Dairy_cattle_Cecum-5__c50947
VC600	11	141.2	7765	2729	0.7384	9.1e-05	Dairy_cattle_Colon-4__c42 Dairy_cattle_Rectum-1__c101 Dairy_cattle_Rectum-6__c168846 2022NBT-15260_1 2022NBT-57246 Dairy_cattle_Colon-4__c1261010 Dairy_cattle_Colon-5__c696107 Dairy_cattle_Rectum-5__c260604 Water_buffalos_Colon-2__c404090 Water_deer_Cecum-2__c106066 Yak_Rectum-5__c561583
VC601	49	94.82	112000	79600	0.5831	0	2022NBT-61686 2022NBT-21878 2022NBT-30090 2022NBT-35455 2022NBT-60083 2022NBT-60561 2022NBT-62421 2022NBT-62883 2022NBT-63625 2022NBT-64108 2022NBT-64803 2022NBT-65802 2022NBT-65930 2022NBT-66685 2022NBT-68404 2022NBT-68514 2022NBT-70443 2022NBT-76844 Dairy_cattle_Cecum-1__c106021 Dairy_cattle_Cecum-2__c810750 Dairy_cattle_Colon-4__c750071 Dairy_cattle_Colon-5__c265329 Dairy_cattle_Colon-5__c3529…
VC602	3	144.3	433	4312	0.09115	0.985452	Dairy_cattle_Colon-5__c894945 Yak_Rectum-5__c918054 Roe_deer_Cecum-2__c297
VC603	19	78.69	13500	12300	0.5217	8.87e-06	Goat_Ileum-3__c191984 Roe_deer_Rumen-4__c98905_1 flye-dairy_61010 Roe_deer_Rumen-2__c3811 Sheep_Rumen-2__c3750_1 Sheep_Ileum-1__c108545 Sheep_Rumen-4__c1014 Water_buffalos_Rumen-3__c1994016 Yak_Rumen-5__c963286 s57974.dairy-hifiasm057980l Water_deer_Rectum-4__c156471_1 flye-dairy_79178 Dairy_cattle_Duodenum-3__c1130 Goat_Rumen-2__c2977 Sheep_Ileum-4__c768 Yak_Jejunum-5__c136421 Yak_Rumen-4__c1927…
VC604	3	110.6	331.7	1162	0.2212	0.985452	2022NBT-66251 Roe_deer_Rectum-3__c135081 Water_buffalos_Colon-1__c713765
VC605	56	48.42	74600	244000	0.2337	0.631038	Goat_Colon-2__c91179_1 2022NBT-14784_1 2022NBT-16870_1 2022NBT-38870_1 2022NBT-54722 2022NBT-7986_1 Goat_Cecum-5__c695680 Goat_Colon-3__c469201_1 Roe_deer_Cecum-1__c2541 Roe_deer_Cecum-1__c658097 Roe_deer_Colon-5__c1237_1 Sheep_Colon-2__c961 Sheep_Rectum-1__c87768 Water_buffalos_Cecum-4__c584030_1 Water_deer_Colon-4__c14432_1 Water_deer_Rectum-4__c219904 2022NBT-14044_1 2022NBT-1742_1 2022NBT-184…
VC606	2	186.9	186.9	2174	0.07905	0.979387	Goat_Rectum-5__c172694 Sheep_Rectum-2__c297209
VC607	3	98.92	296.8	1786	0.1421	0.985452	Goat_Rectum-5__c325465 2022NBT-2878_1 Sheep_Colon-4__c423811
VC608	5	81.36	813.6	873.4	0.4794	0.071836	flye-goat_17000_1 Roe_deer_Cecum-4__c419694 Goat_Duodenum-3__c111666 Roe_deer_Colon-4__c297133 Water_buffalos_Rumen-4__c171510
VC609	5	96.82	968.2	2692	0.2638	0.894962	Sheep_Duodenum-2__c7690 Dairy_cattle_Rumen-4__c1936217 Dairy_cattle_Duodenum-6__c163530 Dairy_cattle_Rumen-2__c2294403 Goat_Rumen-1__c18832
VC610	3	218	654	8483	0.07153	0.985452	Water_buffalos_Rumen-2__c1147898 flye-dairy_59145 s15746.dairy-hifiasm015747c
VC611	2	352.5	352.5	361.5	0.4909	0.110336	Roe_deer_Colon-5__c263 Roe_deer_Rectum-5__c597
VC612	5	148.9	1489	19900	0.06964	0.996692	Roe_deer_Colon-3__c3497_1 2022NBT-25352_1 Goat_Cecum-2__c164121_1 Roe_deer_Rectum-3__c967 Water_buffalos_Cecum-4__c862775
VC613	7	73.52	1544	4375	0.2603	0.920068	Yak_Rectum-1__c319505 Roe_deer_Rectum-1__c2504 Yak_Colon-3__c1090279 2022NBT-75384 Sheep_Jejunum-2__c105436 Dairy_cattle_Duodenum-3__c414839 Yak_Duodenum-3__c428349
VC614	4	191.3	1148	4828	0.1918	0.943824	Sheep_Abomasum-1__c554 Sheep_Abomasum-2__c580788_1 Sheep_Rumen-5__c151 flye-dairy_81251
VC615	17	49.44	6723	8404	0.4435	0.0012186	Sheep_Reticulum-3__c966903 Dairy_cattle_Cecum-2__c397148 Goat_Ileum-5__c30755 Roe_deer_Rectum-1__c445913 Roe_deer_Reticulum-2__c267273 Sheep_Abomasum-4__c221013 Sheep_Omasum-3__c336060 Sheep_Rumen-2__c922 flye-dairy_36199 flye-dairy_77609 flye-dairy_79727 flye-dairy_79830 flye-goat_21420 s68551.dairy-hifiasm068560l flye-dairy_39287 flye-dairy_59497 s59339.dairy-hifiasm059345l
VC616	10	55.44	2495	8304	0.2306	0.714625	Sheep_Rumen-1__c1261841 contig_80793 flye-dairy_78216 flye-dairy_79627 flye-dairy_80967 flye-dairy_81279 s59148.dairy-hifiasm059154l s6672.dairy-hifiasm006673c Water_deer_Abomasum-2__c218049 Yak_Rumen-2__c1783543
VC617	5	87.41	874.1	1886	0.3156	0.582734	2022NBT-2114_1 Roe_deer_Cecum-2__c620381 Roe_deer_Reticulum-2__c2376 Sheep_Omasum-1__c184_1 Water_deer_Rectum-1__c129411
VC618	9	76.19	2743	10400	0.2086	0.993291	Water_buffalos_Colon-5__c526246 Water_buffalos_Rectum-3__c335287 Roe_deer_Colon-2__c176799_1 Dairy_cattle_Colon-4__c1122871 Water_buffalos_Colon-5__c864981 Dairy_cattle_Duodenum-3__c148560 Water_buffalos_Rectum-3__c306513 Water_buffalos_Rectum-5__c71526 Yak_Rectum-1__c974584
VC619	3	112.2	336.6	5423	0.05839	0.985452	Water_buffalos_Rumen-1__c898282 Yak_Rumen-5__c1216877 s82597.dairy-hifiasm082610l
VC620	8	64.49	1806	4677	0.2779	0.520939	Water_deer_Rumen-1__c53351 contig_84356 flye-dairy_81038 Dairy_cattle_Reticulum-6__c774675 s84383.dairy-hifiasm084397l s91863.dairy-hifiasm091878l Dairy_cattle_Rumen-3__c101694 Dairy_cattle_Duodenum-3__c116776
VC621	3	245.5	736.5	2295	0.2425	0.904785	Yak_Omasum-3__c626505 s69754.dairy-hifiasm069765l Water_buffalos_Jejunum-2__c61915
VC622	4	70.84	425	3187	0.1174	0.992931	Yak_Rectum-1__c699414_1 Roe_deer_Colon-5__c296_1 Roe_deer_Cecum-5__c283122 Roe_deer_Cecum-1__c463611
VC623	7	36.32	762.8	4659	0.1403	0.937399	Goat_Rectum-5__c172694 Sheep_Rectum-2__c297209 flye-dairy_76912 flye-dairy_50330 s13143.dairy-hifiasm013144l_1 s56763.dairy-hifiasm056768l s100308.dairy-hifiasm100332l
VC624	3	102.5	307.6	4882	0.0592	0.985452	contig_156666 contig_144810 contig_184004
VC625	4	190.3	1142	6646	0.1465	0.992931	flye-dairy_76888 flye-dairy_45848 flye-dairy_80227 s42745.dairy-hifiasm042750l
VC626	9	130	4679	4204	0.5257	0.000286817	flye-dairy_77450 Water_deer_Rumen-1__c341292 flye-dairy_19243 flye-dairy_80566 flye-dairy_80798 s11100.dairy-hifiasm011101c s53004.dairy-hifiasm053009l s53096.dairy-hifiasm053101l s7478.dairy-hifiasm007479c
VC627	6	136.3	2045	7367	0.217	0.967224	flye-dairy_23141 s6761.dairy-hifiasm006762c flye-dairy_70081 s29013.dairy-hifiasm029016c s42001.dairy-hifiasm042006l contig_168347
VC628	4	57.54	345.3	1256	0.2146	0.943824	flye-dairy_50330 s13143.dairy-hifiasm013144l_1 s56763.dairy-hifiasm056768l s100308.dairy-hifiasm100332l
VC629	8	109.1	3055	4148	0.4232	0.00679364	flye-dairy_32832 s52473.dairy-hifiasm052478c Water_deer_Abomasum-4__c242250 Yak_Rumen-1__c2390448 Yak_Rumen-4__c2227355 contig_124959 flye-dairy_32831 flye-dairy_74663
VC630	2	56.41	56.41	1236	0.04352	0.658454	s35517.goat-hifiasm035886c Goat_Rumen-5__c668240
VC631	6	111.2	1667	2861	0.3672	0.189239	Dairy_cattle_Duodenum-3__c78792 Dairy_cattle_Reticulum-2__c205000 Goat_Abomasum-1__c698482 contig_102153 contig_51227 flye-dairy_62212
VC632	4	61.77	370.6	911.7	0.2872	0.843839	2022NBT-56286 2022NBT-59838 2022NBT-66121 Water_deer_Rectum-1__c143246
VC633	2	76.05	76.05	165.7	0.3094	0.658454	Yak_Duodenum-3__c194712 Yak_Jejunum-5__c51964
VC634	4	188.4	1130	335.4	0.767	0.0151914	2022NBT-75132 2022NBT-21599_1 2022NBT-58014 2022NBT-75062
VC635	3	284.6	853.7	1247	0.4053	0.33126	Dairy_cattle_Jejunum-1__c48841 Dairy_cattle_Reticulum-4__c199 Yak_Cecum-1__c882180
VC636	55	50.61	75200	45200	0.624	0	Goat_Rectum-3__c506023 2022NBT-10190_1 2022NBT-2655_1 2022NBT-35126 2022NBT-54476 2022NBT-55623 2022NBT-56519 2022NBT-60341 2022NBT-61248 2022NBT-61254 2022NBT-77605 2022NBT-77658 Dairy_cattle_Colon-3__c28946 Dairy_cattle_Colon-5__c555239 Dairy_cattle_Rectum-3__c657686 Dairy_cattle_Rectum-4__c529286 Goat_Cecum-5__c543469 Goat_Colon-2__c786837_1 Goat_Jejunum-5__c194441_1 Goat_Rectum-3__c606831 Roe…
VC637	43	124.7	113000	13800	0.8906	0	Roe_deer_Cecum-2__c458637 Yak_Colon-3__c404488 Goat_Cecum-6__c77174_1 2022NBT-55997 Dairy_cattle_Cecum-5__c76186 Dairy_cattle_Cecum-5__c762315 Dairy_cattle_Colon-1__c480831 Dairy_cattle_Colon-5__c523317 Goat_Colon-6__c780610 Roe_deer_Cecum-1__c1750 Roe_deer_Rectum-2__c310987 Sheep_Colon-2__c800639 Water_buffalos_Cecum-4__c304302 Water_buffalos_Cecum-5__c317408 Water_buffalos_Cecum-5__c418503 Wate…
VC638	5	81.89	818.9	2127	0.277	0.894962	Roe_deer_Rectum-1__c305 2022NBT-59157 2022NBT-26613 2022NBT-4096_1 2022NBT-8491_1
VC639	23	182	46100	8598	0.842	4.3e-09	Roe_deer_Rectum-5__c1711 2022NBT-36517 2022NBT-38651 2022NBT-40455 Dairy_cattle_Jejunum-2__c856 Roe_deer_Cecum-1__c1758 Roe_deer_Cecum-1__c23328 Roe_deer_Cecum-1__c444963 Roe_deer_Cecum-1__c453675 Roe_deer_Colon-5__c550 Roe_deer_Jejunum-1__c624 Roe_deer_Reticulum-5__c1182 Sheep_Colon-5__c678066 Sheep_Rectum-1__c861575 Water_buffalos_Cecum-4__c491994 Water_buffalos_Colon-4__c20385 Water_buffalos_C…
VC640	2	301	301	2792	0.09719	0.979387	Water_deer_Cecum-2__c379390 Water_deer_Cecum-2__c497929
VC641	13	64.35	5019	6045	0.4526	0.000429061	Yak_Colon-4__c567674 2022NBT-76470 2022NBT-8887_1 Yak_Jejunum-5__c38655 Yak_Rectum-4__c526897 s12278.dairy-hifiasm012279l 2022NBT-28621_1 2022NBT-28787 2022NBT-62871 2022NBT-8793_1 Yak_Rectum-1__c846886 2022NBT-86120 Yak_Rumen-3__c10476
VC642	2	273.9	273.9	1787	0.1327	0.979387	Water_buffalos_Colon-2__c668947 Yak_Rectum-3__c51187
VC643	2	95.6	95.6	879.7	0.09762	0.658454	2022NBT-101582 2022NBT-66782
VC644	3	21.95	65.85	45.4	0.5616	0.0952151	s12265.dairy-hifiasm012266c flye-goat_9206 Goat_Rumen-5__c670900
VC645	19	101.2	17300	69500	0.1992	0.997889	2022NBT-1017_1 2022NBT-22640_1 2022NBT-22693_1 2022NBT-65585 Goat_Colon-2__c586888_1 Roe_deer_Cecum-5__c2354 Sheep_Rumen-1__c588162 Water_buffalos_Cecum-4__c417314 Water_buffalos_Rumen-1__c643400_1 Water_buffalos_Rumen-3__c1046684 Water_deer_Rectum-1__c305927_1 contig_129767 contig_46621 flye-goat_12816 s94125.dairy-hifiasm094140l Goat_Ileum-1__c15711 Water_deer_Rectum-1__c287925 contig_174263 co…
VC646	19	128.2	21900	14900	0.5953	7.39e-08	2022NBT-14044_1 2022NBT-1742_1 2022NBT-18410_1 2022NBT-46449 2022NBT-52514_1 2022NBT-624_1 2022NBT-74163 2022NBT-77213 Goat_Rumen-6__c387420 Roe_deer_Cecum-2__c1797_1 Roe_deer_Cecum-3__c17816 Roe_deer_Cecum-4__c9993_1 Roe_deer_Colon-1__c131020 Water_deer_Cecum-3__c220137 Water_deer_Rectum-4__c46465 flye-goat_20699_1 s457.goat-hifiasm000473c_1 Roe_deer_Cecum-2__c134312_1 Sheep_Colon-3__c609573
VC647	5	256.1	2561	2117	0.5462	0.00609289	2022NBT-19041_1 2022NBT-24445_1 Dairy_cattle_Rectum-1__c389342 Water_buffalos_Colon-1__c663990 2022NBT-36660
VC648	7	147.2	3091	6952	0.3073	0.937399	Goat_Rectum-1__c131 2022NBT-81685 2022NBT-90157 Goat_Cecum-2__c275248 Goat_Rectum-3__c152287 Roe_deer_Rectum-1__c917 Water_buffalos_Cecum-1__c588642
VC649	153	30.25	352000	555000	0.3878	4.61e-06	contig_30484 2022NBT-1017_1 2022NBT-15687_1 2022NBT-21174_1 2022NBT-2195_1 2022NBT-22319_1 2022NBT-23302_1 2022NBT-24201_1 2022NBT-26482_1 2022NBT-30459_1 2022NBT-35164_1 2022NBT-40935_1 2022NBT-4266_1 2022NBT-61014 2022NBT-69828 2022NBT-764_1 2022NBT-9152_1 Dairy_cattle_Reticulum-6__c194724 Goat_Abomasum-3__c819_1 Goat_Cecum-2__c601367 Goat_Duodenum-2__c11_1 Goat_Duodenum-2__c209073_1 Goat_Ileum…
VC650	60	87.3	155000	167000	0.4798	0	2022NBT-2409_1 Roe_deer_Rumen-3__c72044 Water_deer_Omasum-4__c152097_1 Water_deer_Colon-1__c90779 flye-goat_21317 2022NBT-2792_1 2022NBT-33205_1 s27637.goat-hifiasm027949l 2022NBT-15986_1 Water_buffalos_Rumen-1__c140276 2022NBT-45041 Goat_Rumen-2__c3173_1 flye-goat_19805_1 s3614.goat-hifiasm003711c_1 2022NBT-17895_1 2022NBT-27748_1 2022NBT-39138 2022NBT-43342 2022NBT-581_1 2022NBT-9379_1 Goat_Duo…
VC651	29	103.6	42100	17500	0.7052	0	2022NBT-24660_1 2022NBT-54245 flye-goat_4341_1 contig_123767 Goat_Omasum-3__c357908 flye-goat_2097 contig_187483 2022NBT-44286_1 Water_buffalos_Rumen-1__c1206982_1 contig_36428 Sheep_Colon-4__c92013_1 contig_129220 contig_154054 contig_148986 contig_33884 Yak_Rumen-5__c62586 2022NBT-46230 2022NBT-55563_1 Goat_Reticulum-6__c581_1 Goat_Rumen-3__c663635 Goat_Rumen-6__c249060 Roe_deer_Reticulum-3__c2…
VC652	11	111.5	6132	57300	0.09671	0.999969	2022NBT-26482_1 Goat_Duodenum-2__c209073_1 Goat_Ileum-6__c142664 Roe_deer_Abomasum-5__c25 Roe_deer_Jejunum-2__c268_1 Roe_deer_Reticulum-3__c1225 Water_buffalos_Reticulum-1__c520794_1 Water_buffalos_Rumen-5__c1421562 contig_36960 s30745.goat-hifiasm031083l Roe_deer_Jejunum-2__c156_1
VC653	10	247.8	11200	38500	0.2246	0.999933	Sheep_Colon-3__c498095 Goat_Colon-2__c104854 Yak_Colon-3__c604717 2022NBT-17021_1 Sheep_Colon-2__c360304 2022NBT-22311 Roe_deer_Rectum-4__c3499 flye-dairy_58438 s14532.goat-hifiasm014741l s29353.dairy-hifiasm029356l
VC654	17	113.2	15400	21200	0.4201	0.0394913	Yak_Colon-4__c126914 Water_buffalos_Cecum-4__c416559 Water_buffalos_Colon-4__c23836 2022NBT-40633 2022NBT-42486 2022NBT-43785 Water_deer_Cecum-2__c157003 2022NBT-27930 2022NBT-58558 2022NBT-60271 2022NBT-60616 2022NBT-62270 2022NBT-71108 Dairy_cattle_Colon-3__c621767 Water_buffalos_Colon-2__c244408 Water_deer_Rectum-1__c336677 Yak_Rectum-2__c396123
VC655	11	125.1	6883	37500	0.155	0.999487	Goat_Abomasum-3__c819_1 Sheep_Omasum-1__c103468 contig_37122 Sheep_Duodenum-4__c147154_1 contig_118493 Roe_deer_Omasum-3__c81252 Sheep_Omasum-1__c93675_1 Sheep_Rumen-1__c1591685 Goat_Omasum-3__c505488_1 contig_3613 s72610.dairy-hifiasm072621l
VC656	16	240.9	28900	75200	0.2775	0.921221	2022NBT-45021 2022NBT-45993_1 2022NBT-52862 2022NBT-826_1 2022NBT-9551_1 Water_deer_Colon-2__c71410 Water_deer_Rectum-1__c421782_1 contig_100454 contig_114830 contig_153122 contig_192350 contig_193124 contig_85892 contig_9308 s4647.dairy-hifiasm004648l_1 2022NBT-81567_1
VC657	77	70.39	206000	234000	0.4684	0	2022NBT-2409_1 Roe_deer_Rectum-3__c2461 Roe_deer_Rumen-3__c72044 Water_deer_Omasum-4__c152097_1 Roe_deer_Rectum-5__c57868 Roe_deer_Reticulum-2__c180180 Water_deer_Colon-1__c90779 flye-goat_21317 2022NBT-15196_1 2022NBT-2326_2 2022NBT-2792_1 2022NBT-30670 2022NBT-33205_1 2022NBT-45335_1 Goat_Colon-4__c341329_1 Goat_Omasum-1__c361762 Roe_deer_Rumen-1__c716 Sheep_Rectum-3__c774063 Water_deer_Omasum-…
VC658	18	10.74	1644	2706	0.3747	0.0749965	Sheep_Colon-3__c497850 2022NBT-111741 Goat_Colon-2__c134854 Roe_deer_Cecum-1__c345359 Sheep_Rectum-4__c464837 2022NBT-124538 2022NBT-142929 Roe_deer_Colon-1__c841745 Roe_deer_Colon-4__c3630_1 Sheep_Rectum-3__c438516 Water_buffalos_Rectum-5__c189453 Water_deer_Colon-4__c139983 Water_deer_Rectum-5__c84171 Dairy_cattle_Rumen-3__c28410 Goat_Rectum-3__c135631 Roe_deer_Colon-5__c270165 Sheep_Rectum-3__…
VC659	2	389.7	389.7	2112	0.1555	0.979387	contig_180683 contig_166796
VC660	12	14.03	925.8	7192	0.1137	0.994903	Roe_deer_Cecum-1__c672362 2022NBT-12844 Goat_Colon-1__c48263 Sheep_Omasum-3__c637341 Water_buffalos_Colon-1__c333961 Water_buffalos_Rectum-1__c757663 Water_deer_Rumen-5__c335906 Roe_deer_Abomasum-5__c877 contig_110340 Roe_deer_Abomasum-5__c205 Roe_deer_Abomasum-5__c686 Roe_deer_Omasum-5__c541
VC661	39	49.96	37000	40900	0.4744	3.24e-07	Roe_deer_Reticulum-3__c192 Roe_deer_Reticulum-3__c50416_1 Water_deer_Reticulum-5__c52504 Water_deer_Reticulum-4__c116583 Roe_deer_Reticulum-3__c1891_1 Roe_deer_Rumen-3__c2741 Roe_deer_Rumen-5__c88632 Water_buffalos_Rumen-3__c1653651 Water_deer_Abomasum-3__c225171 Water_deer_Abomasum-4__c113830 Water_deer_Reticulum-5__c90459 Water_deer_Rumen-5__c314362 Roe_deer_Reticulum-3__c202363 Yak_Rumen-4__c2…
VC662	2	436	436	8768	0.04735	0.979387	Goat_Reticulum-1__c56843 Goat_Rumen-4__c833
VC663	8	50.18	1405	2184	0.3897	0.247418	Roe_deer_Rectum-4__c2807_1 Water_deer_Colon-2__c419596 2022NBT-68975 Yak_Rectum-3__c217284 Yak_Rectum-5__c858080 2022NBT-64788 Roe_deer_Rectum-5__c2285 Sheep_Colon-2__c136630
VC664	49	83.44	98100	167000	0.3697	0.0366857	contig_30484 2022NBT-764_1 Sheep_Duodenum-3__c470390 Goat_Jejunum-3__c147741 Yak_Omasum-1__c99565 contig_117110 contig_53067 contig_66313 contig_69989 contig_87652 flye-dairy_24945_1 flye-goat_14865_1 s12863.dairy-hifiasm012864l_1 s40299.goat-hifiasm040708l s55903.dairy-hifiasm055908l_1 Goat_Rumen-1__c810318_1 Goat_Duodenum-3__c237262 Sheep_Abomasum-5__c517616_1 s69884.dairy-hifiasm069895l s97.go…
VC665	2	379.1	379.1	2882	0.1161	0.979387	contig_109720 contig_174469
VC666	3	261.2	783.5	5808	0.1188	0.985452	contig_129767 contig_174263 contig_48470
VC667	6	22.46	336.9	1429	0.1895	0.984681	2022NBT-12844 Goat_Colon-1__c48263 Sheep_Omasum-3__c637341 Water_buffalos_Colon-1__c333961 Water_buffalos_Rectum-1__c757663 Water_deer_Rumen-5__c335906
VC668	13	173.3	13500	38000	0.2624	0.995544	2022NBT-35530 Roe_deer_Cecum-2__c187599 Roe_deer_Jejunum-1__c153216 Water_deer_Rectum-1__c220_1 2022NBT-13408_1 2022NBT-19217_1 2022NBT-20567_1 2022NBT-3620_1 2022NBT-3788_2 2022NBT-5430_1 2022NBT-62155 2022NBT-73178 2022NBT-8778_1
VC669	7	36.36	763.6	4608	0.1418	0.998917	s17105.goat-hifiasm017333l flye-goat_4531 flye-goat_8388 flye-goat_4410 flye-goat_8387 flye-goat_19870 flye-goat_12165
VC670	11	35.16	1934	1053	0.6427	4.08e-05	Goat_Reticulum-5__c55919 Goat_Duodenum-5__c226519_1 Goat_Rumen-3__c135647 Goat_Rumen-3__c50969 Goat_Rumen-3__c828859 Goat_Rumen-6__c2502 Goat_Rumen-6__c768005 Roe_deer_Rumen-1__c246392_1 Roe_deer_Rumen-3__c357094 Sheep_Rumen-3__c789293 s7964.goat-hifiasm008114l
VC671	3	159.9	479.7	10300	0.04458	0.985452	s5244.goat-hifiasm005362l Goat_Ileum-6__c161706 Water_buffalos_Abomasum-1__c141680_1
VC672	3	130.4	391.1	3549	0.09911	0.985452	contig_124658 contig_61486 contig_23
VC673	3	151.5	454.4	803.5	0.3595	0.5	Goat_Jejunum-2__c15660 s87552.dairy-hifiasm087567l s70037.dairy-hifiasm070048l
VC674	4	126.1	756.6	8902	0.07826	0.992931	2022NBT-69354 2022NBT-1578_1 2022NBT-75350 2022NBT-79263
VC675	7	170	3570	8531	0.2947	0.5	Goat_Jejunum-2__c132219 Roe_deer_Abomasum-3__c51113 Yak_Rumen-2__c269658 Roe_deer_Reticulum-4__c1714 Sheep_Abomasum-2__c229994 Sheep_Duodenum-4__c217042 Yak_Rumen-4__c719682
VC676	92	38.21	160000	113000	0.5849	0	Goat_Jejunum-6__c51890 Yak_Duodenum-1__c291273 flye-dairy_64645 Dairy_cattle_Jejunum-1__c70750 Dairy_cattle_Rectum-5__c469914 flye-dairy_66070 flye-dairy_66903 flye-dairy_66904 flye-dairy_68403 Dairy_cattle_Jejunum-1__c686052 Sheep_Duodenum-2__c252200 Yak_Duodenum-3__c73455 flye-dairy_33040 flye-dairy_39871 flye-dairy_56593 flye-dairy_62677 flye-dairy_63266 flye-dairy_63527_1 flye-dairy_80048 s44…
VC677	3	249.5	748.5	677.9	0.5226	0.0404278	Roe_deer_Abomasum-1__c1216 Roe_deer_Reticulum-2__c2259 Sheep_Abomasum-4__c242476
VC678	11	68.27	3755	14900	0.2016	0.99993	Roe_deer_Cecum-1__c399055 Sheep_Cecum-2__c625067_1 Yak_Rectum-1__c218712 Roe_deer_Rectum-2__c258635 2022NBT-1300_1 Dairy_cattle_Cecum-3__c501838 Goat_Rectum-3__c748296 Roe_deer_Colon-1__c786439_1 Roe_deer_Colon-4__c109466 Water_deer_Cecum-2__c195198 Water_deer_Rectum-4__c271666_1
VC679	6	117.6	1764	11600	0.1319	0.998474	Roe_deer_Jejunum-1__c191693 s70785.dairy-hifiasm070796l s73614.dairy-hifiasm073625l flye-dairy_45590 s79966.dairy-hifiasm079979l s9670.dairy-hifiasm009671l
VC680	2	48.03	48.03	414.8	0.1029	0.979387	Sheep_Abomasum-1__c223064 Sheep_Duodenum-5__c139
VC681	22	57.26	13200	38800	0.2539	0.967306	Sheep_Rectum-2__c611651 Water_buffalos_Colon-5__c526246 Water_buffalos_Rectum-3__c335287 Roe_deer_Rectum-1__c2058_1 2022NBT-38695_1 Goat_Rectum-6__c316522 Roe_deer_Colon-2__c176799_1 Water_buffalos_Rectum-5__c782837 Dairy_cattle_Cecum-3__c851940 Dairy_cattle_Colon-4__c1122871 Water_buffalos_Colon-5__c864981 Water_buffalos_Rectum-3__c286685 Water_buffalos_Rectum-5__c214540 Water_buffalos_Rectum-5_…
VC682	7	88.07	1849	5602	0.2477	0.951651	Water_deer_Ileum-2__c11 Water_deer_Ileum-3__c49614 Yak_Rumen-5__c382136 flye-dairy_42612 flye-dairy_49776 flye-dairy_42614 s35321.dairy-hifiasm035325l
VC683	7	120.1	2522	6167	0.2898	0.649261	Water_buffalos_Reticulum-3__c529368 Water_buffalos_Rumen-5__c2256652 flye-dairy_66468 Water_buffalos_Rumen-4__c695504 flye-dairy_70841 flye-dairy_71387 Sheep_Duodenum-1__c37413
VC684	2	207.7	207.7	1874	0.09955	0.979387	2022NBT-10182_1 Water_deer_Rectum-4__c260949
VC685	45	84.71	83900	78600	0.516	0	flye-dairy_64689 s32985.dairy-hifiasm032989l s34877.dairy-hifiasm034881l s9516.dairy-hifiasm009517l_1 Sheep_Ileum-4__c202293 flye-dairy_31906 s47226.dairy-hifiasm047231l Dairy_cattle_Duodenum-3__c455001 Dairy_cattle_Duodenum-3__c99 Sheep_Ileum-1__c44950 Sheep_Reticulum-2__c97298 Yak_Duodenum-1__c52007 s13183.dairy-hifiasm013184l s82873.dairy-hifiasm082886l s18354.dairy-hifiasm018356l flye-dairy_6…
VC686	5	211.7	2117	5764	0.2683	0.996692	2022NBT-32503_1 2022NBT-38239_1 2022NBT-582_1 Roe_deer_Colon-3__c385785 Water_buffalos_Colon-5__c751550
VC687	2	143.2	143.2	1877	0.07073	0.979387	2022NBT-41061_1 2022NBT-11047_1
VC688	3	171.6	514.8	1791	0.2227	0.985452	2022NBT-75228 2022NBT-3309_1 2022NBT-34784_1
VC689	5	81.55	815.5	2782	0.2261	0.981643	Water_deer_Rumen-4__c316685 Yak_Jejunum-5__c194641 Goat_Rectum-3__c506335 Goat_Abomasum-3__c683621 Sheep_Rumen-4__c3640
VC690	3	437.2	1312	1186	0.5239	0.0404278	2022NBT-10175 Goat_Rectum-1__c815809 Water_buffalos_Rectum-4__c79314
VC691	8	80.61	2257	3577	0.3858	0.247418	Roe_deer_Colon-3__c100122 Goat_Rumen-2__c1950 Roe_deer_Duodenum-2__c267328 2022NBT-17959 Roe_deer_Omasum-4__c116705 Roe_deer_Rumen-5__c30713 Roe_deer_Rumen-5__c370696_1 Water_deer_Omasum-1__c150253
VC692	2	443.2	443.2	670.6	0.3965	0.658454	s3553.goat-hifiasm003649c Sheep_Duodenum-1__c30755
VC693	27	143.4	50300	42600	0.5414	1.5e-09	Sheep_Rectum-2__c332488_1 Roe_deer_Colon-1__c840599_1 Goat_Colon-6__c463416 2022NBT-1332_1 2022NBT-19148_1 2022NBT-24147_1 2022NBT-38664 Faecalibacterium~phage~FP_Brigit Goat_Cecum-2__c623686_1 Goat_Colon-1__c612333_1 Goat_Colon-2__c787648 Goat_Colon-3__c543292_1 Goat_Rumen-5__c1132092_1 Roe_deer_Cecum-3__c1759_1 Roe_deer_Rectum-1__c798886 Roe_deer_Rumen-3__c1041 Roe_deer_Rumen-5__c3721_1 Sheep_O…
VC694	101	51.06	258000	109000	0.702	0	Water_buffalos_Cecum-4__c523652 2022NBT-31634_1 2022NBT-21548 Sheep_Rectum-4__c478678 Water_buffalos_Colon-1__c246508 Yak_Cecum-3__c748635 Yak_Rectum-1__c544332 Dairy_cattle_Colon-5__c782711 2022NBT-4599_1 Sheep_Colon-5__c498529 Water_buffalos_Colon-1__c569645 Yak_Rectum-4__c551843 2022NBT-3126_1 2022NBT-354_1 2022NBT-40235 2022NBT-52266 2022NBT-62279 2022NBT-62502 2022NBT-63906 2022NBT-66682 202…
VC695	2	3.351	3.351	105.7	0.02963	0.979387	Water_deer_Reticulum-5__c397 Water_buffalos_Cecum-1__c894963
VC696	8	52.87	1480	4281	0.2562	0.562587	flye-goat_21336 Water_buffalos_Rumen-1__c1156833 flye-dairy_77728 Roe_deer_Colon-3__c2405 Water_deer_Abomasum-2__c30801 Roe_deer_Rumen-2__c392140 Sheep_Omasum-4__c215054 Roe_deer_Rumen-5__c503792
VC697	9	174.6	6287	9815	0.39	0.0466988	2022NBT-18410_1 2022NBT-52514_1 2022NBT-74163 2022NBT-77213 Roe_deer_Cecum-2__c1797_1 Roe_deer_Cecum-4__c9993_1 Water_deer_Rectum-4__c46465 Roe_deer_Cecum-2__c134312_1 Sheep_Colon-3__c609573
VC698	4	111.7	670	2124	0.2391	0.992931	Goat_Jejunum-3__c355868 s18122.goat-hifiasm018360l s23440.goat-hifiasm023716l Yak_Jejunum-5__c35585
VC699	35	113.1	67300	118000	0.3632	0.0742613	Water_deer_Colon-1__c15_1 Water_deer_Reticulum-5__c155 Goat_Cecum-5__c15197_1 Goat_Rectum-3__c353141_1 Roe_deer_Rectum-5__c454478_1 Roe_deer_Reticulum-2__c71566_1 Water_buffalos_Colon-1__c406113 Water_deer_Cecum-5__c362 Roe_deer_Rumen-2__c4942 2022NBT-125_1 Roe_deer_Abomasum-1__c37102 Sheep_Colon-3__c132071 Roe_deer_Cecum-5__c230930 Water_deer_Cecum-5__c1030 2022NBT-20300_1 2022NBT-20985_1 2022NB…
VC700	2	301.8	301.8	5460	0.05235	0.979387	contig_101397 contig_70387
VC701	13	130.8	10200	8602	0.5419	3.17e-05	Goat_Jejunum-2__c202941 s204.goat-hifiasm000207l_1 s2471.goat-hifiasm002547c Dairy_cattle_Duodenum-1__c71435 Goat_Duodenum-3__c96283 Roe_deer_Jejunum-1__c61 Sheep_Abomasum-5__c141418 Sheep_Jejunum-1__c235323 Yak_Duodenum-3__c321203 s47133.dairy-hifiasm047138l s57786.dairy-hifiasm057792l s59676.dairy-hifiasm059682l s96597.dairy-hifiasm096615l
VC702	7	65.25	1370	4234	0.2439	0.963181	2022NBT-44797 2022NBT-97229 Roe_deer_Cecum-2__c231659 Roe_deer_Colon-5__c348814 Sheep_Rumen-4__c54813 Sheep_Omasum-1__c442396 Sheep_Rumen-1__c397013
VC703	3	226.1	678.2	1946	0.2578	0.808633	2022NBT-46866 2022NBT-50991 2022NBT-76733
VC704	2	261.6	261.6	1193	0.1794	0.979387	2022NBT-62687 2022NBT-63043
VC705	2	121.6	121.6	1438	0.07777	0.979387	2022NBT-75489 2022NBT-74397
VC706	6	110.9	1663	10400	0.1373	0.993467	2022NBT-10182_2 2022NBT-10182_1 2022NBT-87619 2022NBT-9021_1 2022NBT-9021_2 Water_deer_Rectum-4__c260949
VC707	5	90.37	903.7	3590	0.2007	0.928164	Roe_deer_Rectum-5__c849_1 Goat_Colon-2__c86_1 Water_deer_Rectum-3__c421655_1 Water_deer_Colon-5__c279399 Roe_deer_Rectum-4__c542320
VC708	2	196.1	196.1	122.2	0.6084	0.110336	Roe_deer_Cecum-3__c993 Roe_deer_Cecum-4__c442847_1
VC709	2	58.56	58.56	954.3	0.05759	0.979387	Sheep_Cecum-5__c35265 2022NBT-78303
VC710	3	85.89	257.7	1147	0.1827	0.985452	Sheep_Rumen-4__c1481126 Water_deer_Rumen-1__c175153 Water_deer_Cecum-1__c96222
VC711	17	84.1	11400	11500	0.4972	6.59e-05	flye-dairy_59287_1 Goat_Omasum-4__c41165_1 Roe_deer_Colon-5__c2071_1 Roe_deer_Colon-5__c68678 Roe_deer_Jejunum-2__c81919 Sheep_Omasum-2__c864826_1 Sheep_Rectum-3__c1281946_1 Sheep_Rumen-1__c665835 Sheep_Rumen-5__c3138 Water_buffalos_Rumen-3__c1044082 Water_buffalos_Rumen-3__c1260369 Yak_Rumen-2__c1659786 Yak_Rumen-2__c563686 Yak_Rumen-4__c2098014 Yak_Rumen-5__c735999 s78820.dairy-hifiasm078833l R…
VC712	122	63.67	470000	284000	0.6235	0	2022NBT-21179_1 2022NBT-23350_1 2022NBT-27341 2022NBT-4454_2 Dairy_cattle_Colon-5__c692 Goat_Cecum-4__c857096_1 Goat_Jejunum-6__c65553 Goat_Rectum-5__c6633_1 Roe_deer_Colon-2__c243240 Roe_deer_Jejunum-1__c140464 Roe_deer_Rectum-2__c790 Sheep_Ileum-3__c58852_1 Water_buffalos_Colon-2__c480461 Water_buffalos_Colon-2__c49263 Water_buffalos_Colon-2__c622601 Water_buffalos_Colon-5__c182339 Water_buffal…
VC713	3	264.5	793.4	972	0.4479	0.0404278	2022NBT-33740 2022NBT-35840 2022NBT-40365
VC714	4	164.1	984.6	4700	0.173	0.992931	Yak_Duodenum-3__c293880 Yak_Rumen-4__c191952 flye-dairy_69689 s56083.dairy-hifiasm056088l
VC715	3	168.1	504.4	3429	0.1281	0.904785	Roe_deer_Cecum-1__c1675 Roe_deer_Colon-1__c2241 Water_buffalos_Rectum-2__c193248
VC716	3	352.2	1057	255.4	0.8017	0.0404278	Water_deer_Ileum-4__c14148 Water_deer_Ileum-1__c33282 Sheep_Ileum-5__c51958
VC717	4	301.7	1810	5992	0.2318	0.992931	Goat_Cecum-5__c399459_1 Goat_Colon-1__c489501 Sheep_Rectum-1__c582 Sheep_Rectum-2__c929604
VC718	29	203.4	82600	39400	0.6765	0	Yak_Jejunum-5__c239662 Sheep_Duodenum-2__c216988 flye-dairy_72154 s53323.dairy-hifiasm053328l s33855.dairy-hifiasm033859l s52139.dairy-hifiasm052144l flye-dairy_67809 Goat_Rumen-1__c406768 Goat_Rumen-5__c2684 Yak_Duodenum-1__c56792 flye-dairy_66311 flye-goat_6249 Water_buffalos_Rumen-3__c1544859_1 Sheep_Abomasum-4__c1311 Sheep_Duodenum-4__c148962 flye-dairy_66795 Yak_Rumen-1__c1754534_1 flye-dair…
VC719	8	171.4	4800	15800	0.233	0.966959	Goat_Jejunum-1__c116258 Roe_deer_Abomasum-4__c1756 Roe_deer_Rumen-2__c291676 Sheep_Abomasum-1__c148434 Sheep_Abomasum-4__c930 Water_deer_Abomasum-3__c190407 Water_deer_Abomasum-4__c78421 Water_deer_Rumen-5__c372120
VC720	3	192	575.9	14100	0.0393	0.985452	Water_buffalos_Omasum-4__c659406 s46505.dairy-hifiasm046510l s76160.dairy-hifiasm076172c
VC721	13	57.26	4466	8679	0.3391	0.438866	2022NBT-12516_1 2022NBT-23919_1 2022NBT-56393_1 2022NBT-60963 Dairy_cattle_Cecum-3__c127681 Dairy_cattle_Cecum-6__c496930 Goat_Cecum-2__c96528_1 Roe_deer_Colon-5__c95782_1 Sheep_Rectum-3__c1218741_1 Water_deer_Rectum-1__c230672_1 Yak_Cecum-1__c578705 Sheep_Cecum-1__c13341_1 2022NBT-59490
VC722	10	72.21	3249	5484	0.3712	0.260261	flye-dairy_57947 Yak_Omasum-5__c670729 Water_buffalos_Colon-3__c75896 2022NBT-84424 Water_buffalos_Colon-3__c87220 Yak_Rectum-1__c986614 Sheep_Rumen-5__c493190 flye-dairy_65873 flye-dairy_80629 flye-dairy_81163
VC723	5	351.2	3512	13500	0.2058	0.734565	flye-dairy_44344 flye-dairy_44345 s9304.dairy-hifiasm009305l s28536.dairy-hifiasm028539l s13702.dairy-hifiasm013703l
VC724	20	61.69	11700	20700	0.3606	0.0702099	Dairy_cattle_Cecum-3__c80 Dairy_cattle_Duodenum-1__c1727 Dairy_cattle_Duodenum-1__c572864 Dairy_cattle_Rectum-3__c693780 Goat_Duodenum-3__c82489 Sheep_Duodenum-2__c231472 Water_buffalos_Rumen-3__c1730778 flye-dairy_38113 flye-dairy_45845 flye-dairy_54399 flye-dairy_69496 flye-dairy_69884 flye-dairy_80550 s15178.dairy-hifiasm015179l s3139.dairy-hifiasm003140l s73846.dairy-hifiasm073857l s86890.dai…
VC725	2	133.3	133.3	1498	0.08152	0.979387	s34118.dairy-hifiasm034122c s68036.dairy-hifiasm068045l
VC726	27	88.43	31000	32600	0.4875	2e-07	2022NBT-10190_1 2022NBT-2655_1 2022NBT-35126 2022NBT-54476 2022NBT-55623 2022NBT-56519 2022NBT-61254 2022NBT-77605 2022NBT-77658 Dairy_cattle_Colon-5__c555239 Dairy_cattle_Rectum-3__c657686 Roe_deer_Colon-3__c411 Roe_deer_Rectum-1__c3152 Roe_deer_Rectum-3__c1561 Roe_deer_Rectum-3__c893 Roe_deer_Rectum-3__c94614 Roe_deer_Rectum-5__c362 Sheep_Rectum-4__c892891 Water_buffalos_Omasum-1__c461486_1 Wat…
VC727	5	37.31	373.1	3277	0.1019	0.996692	2022NBT-83608 2022NBT-721_1 Roe_deer_Rumen-5__c3383 Roe_deer_Rumen-5__c182355 s19445.dairy-hifiasm019447l
VC728	3	126.1	378.2	2470	0.1325	0.985452	2022NBT-27434_1 2022NBT-65690 Goat_Duodenum-3__c342047_1
VC729	9	68.79	2476	6600	0.2723	0.786612	2022NBT-2910_1 2022NBT-49251_1 2022NBT-65725 2022NBT-66480 2022NBT-199_1 2022NBT-153_1 2022NBT-4352_1 Goat_Colon-6__c675794 Roe_deer_Rectum-3__c664211
VC730	3	163.6	490.8	3832	0.1134	0.808633	2022NBT-61270 2022NBT-61651 2022NBT-75886
VC731	140	25.75	251000	196000	0.5607	0	2022NBT-58749 2022NBT-6199_1 Roe_deer_Rectum-3__c1539 Sheep_Cecum-1__c235117_1 Sheep_Rectum-2__c595744 Dairy_cattle_Rectum-1__c524565 2022NBT-6468_1 flye-dairy_80625 2022NBT-43859 2022NBT-28374_1 Water_buffalos_Cecum-1__c938203 Water_deer_Omasum-3__c109830 Dairy_cattle_Rectum-5__c658621 Sheep_Rectum-1__c562 Goat_Jejunum-6__c126299 2022NBT-15340_1 2022NBT-48571_1 2022NBT-58757 2022NBT-61236 2022NB…
VC732	12	63.44	4187	10100	0.2935	0.857262	Goat_Colon-2__c86_1 Goat_Ileum-3__c198846 s12313.dairy-hifiasm012314l Water_buffalos_Rumen-1__c683371_1 Water_deer_Jejunum-2__c38271 flye-dairy_54149 flye-dairy_62929 s20582.dairy-hifiasm020584l s50554.dairy-hifiasm050559l Water_deer_Rectum-3__c421655_1 Yak_Rumen-1__c1149454 flye-dairy_70931
VC733	29	47.77	19400	27000	0.4175	0.000163855	2022NBT-7854_1 Roe_deer_Rectum-3__c432245 Sheep_Rectum-3__c1716 Water_deer_Rectum-2__c369279 2022NBT-44859 2022NBT-6194_1 Water_buffalos_Colon-1__c530875_1 Water_buffalos_Cecum-2__c63535 2022NBT-27677 2022NBT-41662 2022NBT-43299 2022NBT-43516 2022NBT-43637 2022NBT-49328 Dairy_cattle_Cecum-6__c173448 Sheep_Rectum-3__c364873 Sheep_Rectum-4__c483983 Water_buffalos_Cecum-1__c402162 Water_buffalos_Col…
VC734	6	47.96	719.3	3171	0.1843	0.885117	Roe_deer_Cecum-2__c1451_1 Roe_deer_Rumen-5__c3745_1 Roe_deer_Rumen-5__c4786 Goat_Jejunum-5__c7 flye-dairy_77762 contig_98780
VC735	7	88.24	1853	9603	0.1616	0.999299	Goat_Ileum-6__c217821 Goat_Jejunum-2__c86057 Roe_deer_Jejunum-2__c88945 Water_buffalos_Rumen-1__c550909 Yak_Duodenum-1__c51090 Yak_Jejunum-5__c196079 Yak_Jejunum-5__c304169
VC736	5	280.2	2802	5323	0.3444	0.201698	flye-dairy_53729 s97706.dairy-hifiasm097724l flye-dairy_53731 s1770.dairy-hifiasm001771l flye-dairy_58035
VC737	92	45.09	189000	110000	0.6312	0	Roe_deer_Rectum-3__c2493_1 Dairy_cattle_Duodenum-3__c2652 Dairy_cattle_Duodenum-3__c314493 Yak_Jejunum-5__c247620 flye-dairy_61903 flye-dairy_79734 s18881.dairy-hifiasm018883l s70812.dairy-hifiasm070823l 2022NBT-4404_1 Dairy_cattle_Abomasum-2__c539740_1 Dairy_cattle_Reticulum-4__c29 Goat_Ileum-2__c150520_1 Sheep_Abomasum-4__c677 flye-dairy_77748 flye-dairy_79334 s21043.dairy-hifiasm021045l 2022NB…
VC738	3	101.2	303.6	1955	0.1341	0.985452	flye-dairy_79580 s21519.dairy-hifiasm021521l s8537.dairy-hifiasm008538l
VC739	2	459.6	459.6	6338	0.06758	0.979387	Water_buffalos_Rumen-3__c1114104 Yak_Rumen-5__c31
VC740	2	244.6	244.6	4246	0.05442	0.979387	Yak_Abomasum-3__c857148 Yak_Duodenum-3__c99
VC741	3	280.5	841.6	4223	0.166	0.985452	Yak_Jejunum-5__c31415 flye-dairy_81205 s3863.goat-hifiasm003964l_1
VC742	20	126.6	24100	36300	0.3984	0.000310999	flye-dairy_21254 flye-dairy_21255 flye-dairy_67522 s28771.dairy-hifiasm028774l flye-dairy_66789 s77743.dairy-hifiasm077755l s90654.dairy-hifiasm090669l flye-dairy_33340 s70605.dairy-hifiasm070616l s90568.dairy-hifiasm090583l flye-dairy_62774 s48145.dairy-hifiasm048150l s48170.dairy-hifiasm048175l s64775.dairy-hifiasm064783l flye-dairy_61608 flye-dairy_79986 s24713.dairy-hifiasm024715l s80255.dair…
VC743	3	311.5	934.4	2650	0.2602	0.959572	flye-dairy_42612 flye-dairy_49776 flye-dairy_42614
VC744	11	58.2	3201	10400	0.2354	0.967014	Water_deer_Ileum-2__c11 Water_deer_Ileum-3__c49614 Yak_Rumen-5__c382136 flye-dairy_6842 s30988.dairy-hifiasm030991l s38105.dairy-hifiasm038109l s65609.dairy-hifiasm065617l Water_deer_Abomasum-5__c116264 Roe_deer_Rumen-5__c280826 contig_193101 s35321.dairy-hifiasm035325l
VC745	10	125.8	5662	25600	0.181	0.999933	flye-dairy_72500 Sheep_Rumen-2__c999186 Sheep_Rumen-5__c263495 Water_buffalos_Rumen-3__c1116327 Water_deer_Abomasum-3__c283068 Water_deer_Reticulum-3__c43685 Water_deer_Rumen-3__c95921 contig_136212 flye-dairy_78219 s47650.dairy-hifiasm047655l
VC746	8	67.29	1884	8134	0.1878	0.997308	Water_deer_Ileum-2__c11 Water_deer_Ileum-3__c49614 Yak_Rumen-5__c382136 s38105.dairy-hifiasm038109l Water_deer_Abomasum-5__c116264 Roe_deer_Rumen-5__c280826 contig_193101 s35321.dairy-hifiasm035325l
VC747	18	72.8	11100	8725	0.5597	1.61e-07	flye-dairy_77858 2022NBT-21516 flye-goat_21277 Sheep_Rectum-3__c414340_1 Water_buffalos_Rectum-4__c212268 Roe_deer_Omasum-2__c2807 2022NBT-71829 2022NBT-35491_1 2022NBT-38819_1 Water_deer_Colon-3__c387795 2022NBT-72739 Goat_Rectum-4__c152148_1 Roe_deer_Jejunum-1__c42673 Roe_deer_Rectum-1__c685346 Sheep_Colon-2__c173346 Water_buffalos_Colon-1__c101680 Water_deer_Rectum-2__c132006 Yak_Cecum-5__c483…
VC748	22	88.81	20500	14300	0.5882	7.05e-07	2022NBT-26083_1 2022NBT-31248_1 2022NBT-33643 2022NBT-34637 2022NBT-42931 2022NBT-47061 2022NBT-49470 2022NBT-50397 2022NBT-50800 2022NBT-53235 2022NBT-74058 Goat_Colon-2__c424273 Goat_Colon-3__c663081 Goat_Rectum-6__c94561 Roe_deer_Cecum-5__c2074_1 Roe_deer_Rectum-4__c3513 Water_buffalos_Colon-2__c26368 Water_deer_Rectum-2__c566702 Yak_Cecum-1__c259269 s23879.goat-hifiasm024160l_1 2022NBT-47332 …
VC749	2	393.7	393.7	2208	0.1511	0.979387	2022NBT-31248_1 2022NBT-33643
VC750	2	108.3	108.3	337.9	0.2405	0.979387	2022NBT-62803 2022NBT-49661
VC751	3	4.383	13.15	144.6	0.08029	0.986587	Sheep_Abomasum-2__c200327 Roe_deer_Rumen-1__c535226 Goat_Rumen-3__c41500
VC752	2	309.3	309.3	321.7	0.4871	0.110336	s8852.goat-hifiasm009009l flye-goat_715
VC753	2	15.79	15.79	468.8	0.0323	0.979387	2022NBT-44497 s21724.goat-hifiasm021982l
VC754	2	92.12	92.12	2366	0.03742	0.979387	Goat_Cecum-3__c685517 flye-goat_19004
VC755	3	142.2	426.7	1934	0.1803	0.985452	Roe_deer_Rectum-5__c648 Goat_Cecum-2__c641887 Roe_deer_Cecum-3__c2386
VC756	6	122.6	1838	4431	0.2927	0.405091	2022NBT-3239_1 Roe_deer_Rectum-5__c1391_1 2022NBT-6685_1 2022NBT-7030_1 Roe_deer_Rectum-4__c259386 Sheep_Colon-3__c1653_1
VC757	39	43.54	32300	53800	0.3747	0.00123083	Sheep_Omasum-2__c75113 2022NBT-57509 flye-goat_9111 2022NBT-54752 2022NBT-84768 2022NBT-34235 2022NBT-34767 2022NBT-41861 Goat_Rumen-1__c83516 Goat_Rumen-3__c151430 Goat_Rumen-5__c515644 Goat_Rumen-5__c706657 Goat_Rumen-5__c931309 Roe_deer_Abomasum-1__c115498 Roe_deer_Abomasum-5__c128519 Roe_deer_Reticulum-5__c142 Roe_deer_Rumen-1__c3699 Roe_deer_Rumen-2__c437590 Sheep_Rumen-1__c1270489 Sheep_Rum…
VC758	11	6.991	384.5	2224	0.1462	0.447757	2022NBT-101582 2022NBT-66782 Water_buffalos_Rectum-4__c211484 2022NBT-62381 Roe_deer_Rectum-5__c2861 Roe_deer_Colon-2__c344769 Roe_deer_Colon-4__c197324 Dairy_cattle_Rumen-3__c126381 2022NBT-130422 s12265.dairy-hifiasm012266c Goat_Rumen-5__c670900
VC759	6	224.5	3368	2658	0.5578	0.00253743	Roe_deer_Rectum-4__c290724 Roe_deer_Rectum-5__c483_1 Water_deer_Rectum-1__c1_1 2022NBT-52681 2022NBT-63079 Dairy_cattle_Cecum-3__c338551
VC760	6	120.6	1809	10200	0.1509	0.997463	2022NBT-17764 2022NBT-72925 2022NBT-30630 2022NBT-17337 2022NBT-27932 Water_deer_Colon-1__c192089
VC761	9	329.5	11900	38500	0.2355	0.953301	Roe_deer_Rectum-2__c873 Water_deer_Rectum-1__c127 2022NBT-16047 2022NBT-16100 Roe_deer_Rectum-2__c1479 Goat_Cecum-3__c268035_1 Goat_Colon-3__c224456_1 Goat_Reticulum-2__c33016 flye-goat_17877
VC762	69	110.2	259000	168000	0.6062	0	Roe_deer_Rectum-4__c516117 Water_deer_Rumen-4__c269710_1 2022NBT-12743 2022NBT-26509 flye-goat_12360 2022NBT-40999_1 2022NBT-47164 Dairy_cattle_Omasum-5__c474684 Faecalibacterium~phage~FP_Taranis Goat_Abomasum-6__c351608_1 Goat_Cecum-2__c680121 Goat_Cecum-3__c104066_1 Goat_Cecum-4__c543920 Goat_Colon-2__c319913_1 Goat_Colon-5__c57696_1 Goat_Omasum-2__c423524_1 Goat_Omasum-5__c70052_1 Goat_Omasum-…
VC763	14	58.13	5290	8407	0.3854	0.185132	2022NBT-237_1 2022NBT-10219_1 2022NBT-48837 Mesorhizobium~phage~vB_MloP_Lo5R7ANS Pelagibacter~phage~HTVC011P Pelagibacter~phage~HTVC019P Ralstonia~phage~DU_RP_I Ralstonia~phage~RsoP1EGY Rhizobium~phage~RHEph01 flye-dairy_63325 flye-dairy_78353 s46773.dairy-hifiasm046778l s75987.dairy-hifiasm075999l s8715.dairy-hifiasm008716l
VC764	20	133	25300	3155	0.8877	3.39e-08	Cyanophage~SS120-1 Prochlorococcus~phage~P-SSP7 Synechococcus~T7-like~phage~S-TIP37 Synechococcus~phage~P60 Synechococcus~phage~S-B28 Synechococcus~phage~S-CBP2 Synechococcus~phage~Syn5 Cyanophage~9515-10a Cyanophage~KBS-P-1A Cyanophage~NATL1A-7 Synechococcus~phage~S-CBP1 Synechococcus~phage~S-CBP3 Synechococcus~phage~S-CBP4 Synechococcus~phage~S-RIP1 Synechococcus~phage~S-RIP2 Cyanophage~NATL2A-…
VC765	6	121.9	1828	3701	0.3299	0.764415	Dairy_cattle_Colon-5__c609406 Roe_deer_Cecum-3__c1206 Water_buffalos_Colon-5__c557935 Water_deer_Cecum-3__c160271_1 Roe_deer_Rectum-5__c133727_1 Sheep_Colon-1__c646149
VC766	11	207.1	11400	8638	0.568	4.08e-05	Roe_deer_Cecum-5__c3367_1 Roe_deer_Rumen-5__c2997 Sheep_Colon-3__c614998 Water_buffalos_Cecum-2__c761004 Water_buffalos_Rectum-4__c212107 Water_deer_Rumen-2__c140782 Yak_Cecum-1__c599526 Yak_Rectum-1__c648339 flye-dairy_62432 s21172.dairy-hifiasm021174l s22061.dairy-hifiasm022063c
VC767	5	152.1	1521	3096	0.3287	0.734565	flye-dairy_63325 flye-dairy_78353 s46773.dairy-hifiasm046778l s75987.dairy-hifiasm075999l s8715.dairy-hifiasm008716l
VC768	3	205	615.1	19.92	0.9596	0.0404278	s79414.dairy-hifiasm079427l s45019.dairy-hifiasm045024l s3047.dairy-hifiasm003048l
VC769	350	26.02	1590000	204000	0.8857	0	2022NBT-104610 2022NBT-102322 2022NBT-104890 2022NBT-106648 2022NBT-108591 2022NBT-110861 2022NBT-114144 Dairy_cattle_Abomasum-3__c82 Dairy_cattle_Cecum-5__c604138 Dairy_cattle_Cecum-5__c657880 Dairy_cattle_Duodenum-1__c145594 Dairy_cattle_Duodenum-1__c217939 Dairy_cattle_Duodenum-1__c226823 Dairy_cattle_Duodenum-1__c421822 Dairy_cattle_Duodenum-1__c462408 Dairy_cattle_Duodenum-1__c527633 Dairy_c…
VC770	48	60.16	67900	20400	0.7681	0	Dairy_cattle_Duodenum-1__c119714 Dairy_cattle_Duodenum-3__c1298 Dairy_cattle_Duodenum-3__c42403 Dairy_cattle_Jejunum-6__c187438 Yak_Duodenum-1__c122509 Yak_Duodenum-3__c192049 Yak_Duodenum-3__c459638 s87522.dairy-hifiasm087537l Dairy_cattle_Duodenum-3__c1122 Dairy_cattle_Duodenum-3__c172215 Dairy_cattle_Duodenum-3__c201541 Dairy_cattle_Duodenum-3__c433178 Dairy_cattle_Duodenum-3__c614782 Dairy_ca…
VC771	14	34.91	3177	6502	0.3273	0.509164	Dairy_cattle_Duodenum-1__c19736 Dairy_cattle_Duodenum-1__c311337 Dairy_cattle_Duodenum-3__c1802 Dairy_cattle_Ileum-3__c6258 Dairy_cattle_Jejunum-2__c944507 Yak_Duodenum-3__c32968 Yak_Jejunum-5__c250617 Dairy_cattle_Duodenum-3__c161798 Dairy_cattle_Duodenum-3__c521122 Dairy_cattle_Duodenum-3__c581426 Yak_Cecum-2__c19832 Yak_Jejunum-5__c195519 Yak_Jejunum-5__c84712 s44194.dairy-hifiasm044199l
VC772	8	94.41	2643	60300	0.04198	0.999679	Dairy_cattle_Duodenum-1__c226823 Dairy_cattle_Duodenum-3__c570674 Dairy_cattle_Jejunum-2__c1250139 Water_buffalos_Jejunum-5__c196752 Yak_Duodenum-1__c176875 Yak_Jejunum-5__c208885 Yak_Jejunum-5__c325642 s99127.dairy-hifiasm099145l
VC773	10	129.5	5827	68400	0.07851	0.999933	Dairy_cattle_Duodenum-1__c527633 Dairy_cattle_Duodenum-3__c708031 Dairy_cattle_Jejunum-1__c629148 Dairy_cattle_Rectum-3__c714152 Water_buffalos_Rumen-2__c2393752 Yak_Duodenum-3__c263255 Yak_Duodenum-3__c73 Yak_Jejunum-5__c206563 Yak_Rectum-1__c346190 Yak_Duodenum-3__c409240
VC774	8	86.73	2428	34000	0.06659	0.999679	Dairy_cattle_Duodenum-1__c625 Dairy_cattle_Duodenum-3__c103405 Dairy_cattle_Duodenum-3__c140483 Dairy_cattle_Duodenum-3__c1897 Dairy_cattle_Jejunum-1__c662354 Dairy_cattle_Jejunum-2__c1664172 Goat_Ileum-3__c111959 Dairy_cattle_Jejunum-2__c1002412
VC775	2	81.11	81.11	5211	0.01531	0.979387	Dairy_cattle_Colon-4__c867184 Dairy_cattle_Duodenum-3__c825822
VC776	18	55.52	8495	108000	0.07289	1	Dairy_cattle_Duodenum-1__c625 Dairy_cattle_Duodenum-3__c103405 Dairy_cattle_Duodenum-3__c105445 Dairy_cattle_Duodenum-3__c140483 Dairy_cattle_Duodenum-3__c1897 Dairy_cattle_Duodenum-3__c741665 Dairy_cattle_Jejunum-1__c662354 Dairy_cattle_Jejunum-2__c1204968 Dairy_cattle_Jejunum-2__c1264301 Dairy_cattle_Jejunum-2__c1664172 Dairy_cattle_Jejunum-6__c243466 Goat_Ileum-3__c111959 Sheep_Ileum-1__c12387…
VC777	8	95.82	2683	52200	0.04889	0.999679	Dairy_cattle_Duodenum-3__c1117 Dairy_cattle_Duodenum-3__c538346 Dairy_cattle_Jejunum-6__c138681 Sheep_Jejunum-1__c251697 Water_buffalos_Rumen-3__c441037 Water_deer_Ileum-2__c107861 Yak_Rectum-2__c20612 Yak_Rumen-2__c1467562
VC778	6	70.94	1064	1663	0.3885	0.532132	Yak_Cecum-2__c76 Yak_Jejunum-5__c323791 Yak_Rectum-1__c1098192 Water_buffalos_Rumen-3__c1379411 Yak_Duodenum-1__c152139 Yak_Rectum-4__c159781
VC779	10	57.25	2576	12300	0.1725	0.999933	Sheep_Duodenum-2__c100711 Sheep_Duodenum-3__c510108 Sheep_Duodenum-5__c79787 Dairy_cattle_Duodenum-1__c19736 Dairy_cattle_Duodenum-1__c311337 Dairy_cattle_Duodenum-3__c1802 Dairy_cattle_Ileum-3__c6258 Dairy_cattle_Jejunum-2__c944507 Yak_Duodenum-3__c32968 Yak_Jejunum-5__c250617
VC780	7	82.41	1731	5921	0.2258	0.999299	Dairy_cattle_Duodenum-1__c19736 Dairy_cattle_Duodenum-1__c311337 Dairy_cattle_Duodenum-3__c1802 Dairy_cattle_Ileum-3__c6258 Dairy_cattle_Jejunum-2__c944507 Yak_Duodenum-3__c32968 Yak_Jejunum-5__c250617
VC781	4	127.7	766.4	25300	0.02935	0.992931	Dairy_cattle_Duodenum-3__c744799 Dairy_cattle_Jejunum-2__c788296 Yak_Duodenum-1__c224239 Yak_Duodenum-3__c14358
VC782	12	61.55	4062	72900	0.0528	0.999986	Dairy_cattle_Duodenum-3__c1117 Dairy_cattle_Duodenum-3__c538346 Dairy_cattle_Jejunum-6__c138681 Sheep_Duodenum-2__c169209 Sheep_Jejunum-1__c251697 Water_buffalos_Rumen-3__c441037 Water_deer_Ileum-2__c107861 Yak_Jejunum-5__c23574 Yak_Jejunum-5__c53022 Yak_Rectum-2__c20612 Yak_Rumen-2__c1467562 Yak_Rumen-2__c701919
VC783	3	143.4	430.1	19500	0.0216	0.985452	Sheep_Duodenum-3__c16860 Sheep_Duodenum-3__c662413 Sheep_Jejunum-4__c58203
VC784	4	72.24	433.4	16300	0.02591	0.992931	Sheep_Duodenum-5__c217746 Yak_Duodenum-1__c340598 s3808.dairy-hifiasm003809l Dairy_cattle_Jejunum-2__c636702
VC785	2	254	254	15000	0.01664	0.984809	Yak_Duodenum-3__c302179 Yak_Rectum-5__c861446
VC786	20	187.4	35600	20600	0.6332	7.88e-07	2022NBT-14738_1 2022NBT-10237_1 2022NBT-15095_1 2022NBT-224_1 2022NBT-2862_1 2022NBT-49623 2022NBT-5300_1 2022NBT-60248 2022NBT-6338_1 Goat_Abomasum-2__c207_1 Goat_Cecum-4__c112 Goat_Cecum-6__c337 Goat_Rectum-3__c40_1 Roe_deer_Colon-1__c1346 Roe_deer_Colon-1__c840592_1 Roe_deer_Rumen-3__c420_1 Sheep_Colon-3__c1487_1 Sheep_Rectum-1__c859277_1 Water_deer_Colon-4__c223_1 Yak_Colon-4__c432722
VC787	9	114.3	4115	4513	0.4759	0.000396135	Water_buffalos_Rumen-4__c1097920 Goat_Cecum-2__c424455 Sheep_Rectum-1__c1267 Yak_Rumen-2__c930615 Dairy_cattle_Rectum-3__c313469 Goat_Colon-6__c185061_1 Water_buffalos_Cecum-5__c177021_1 Yak_Rectum-5__c593912 flye-dairy_81275
VC788	31	137.3	63900	30600	0.6754	0	Roe_deer_Cecum-2__c719_1 2022NBT-49137 Roe_deer_Cecum-2__c381_1 Roe_deer_Cecum-2__c648338 Roe_deer_Rumen-2__c3995 Water_deer_Rectum-4__c87879_1 flye-dairy_80443 2022NBT-33172_1 Sheep_Cecum-2__c10063 Water_buffalos_Colon-3__c79368 Goat_Rumen-1__c426188_1 Roe_deer_Abomasum-5__c1174 Roe_deer_Omasum-2__c280246 Roe_deer_Rectum-2__c1513 Roe_deer_Rumen-5__c3251 Sheep_Duodenum-5__c108790 Sheep_Omasum-2__…
VC789	54	99.76	143000	19900	0.8768	0	Roe_deer_Colon-2__c428 Water_deer_Rectum-3__c111 Water_buffalos_Reticulum-1__c83165 Sheep_Colon-2__c16970 Sheep_Colon-2__c146359_1 Sheep_Rectum-1__c851359 Yak_Colon-3__c12_1 Goat_Abomasum-6__c561568_1 Goat_Cecum-2__c772016_1 Goat_Duodenum-5__c218075_1 Goat_Reticulum-3__c58632 Goat_Rumen-1__c822874 Goat_Rumen-1__c926635 Goat_Rumen-2__c1637 Goat_Rumen-4__c541907 Goat_Rumen-5__c457833 Roe_deer_Aboma…
VC790	6	184	2760	5215	0.3456	0.405091	Roe_deer_Colon-4__c1540 Water_buffalos_Colon-2__c468378 Water_buffalos_Colon-2__c656001 Yak_Rectum-2__c29 Yak_Rectum-2__c336978 Yak_Rectum-5__c11
VC791	23	130.7	33100	12200	0.729	9.61e-08	Sheep_Rectum-1__c859277_1 Sheep_Colon-1__c804436 Water_deer_Rectum-1__c198 Goat_Cecum-6__c86346 Water_deer_Cecum-2__c151202 Goat_Rumen-6__c564907 Roe_deer_Reticulum-5__c152591 Roe_deer_Rumen-1__c225453 s8393.goat-hifiasm008546l Dairy_cattle_Reticulum-6__c1391482 Goat_Reticulum-2__c561468 Roe_deer_Rectum-1__c1874 Roe_deer_Rectum-2__c424380_1 Sheep_Colon-1__c437095_1 Sheep_Rectum-3__c147762 Sheep_R…
VC792	2	181.3	181.3	2883	0.05909	0.979387	Water_buffalos_Rumen-4__c248562 Yak_Rumen-1__c76109
VC793	2	29.41	29.41	219.6	0.1163	0.979387	Water_buffalos_Colon-5__c642760 Water_buffalos_Rectum-1__c648751
VC794	10	24.65	1109	6743	0.1409	0.999909	s17105.goat-hifiasm017333l flye-goat_4531 flye-goat_8388 flye-goat_4410 flye-goat_15558 flye-goat_8387 flye-goat_8935 flye-goat_6907 flye-goat_19870 flye-goat_12165
VC795	9	102.6	3692	3668	0.5004	0.00309666	2022NBT-22118_1 2022NBT-518_1 Goat_Colon-1__c533116_1 Goat_Cecum-3__c684313 Sheep_Colon-2__c301278 Water_buffalos_Rectum-1__c630219 flye-goat_16520_1 flye-goat_3319_1 s18294.goat-hifiasm018533c
VC796	2	150.5	150.5	3963	0.03655	0.979387	2022NBT-29566 2022NBT-31209
VC797	7	13.69	287.4	2798	0.09274	0.994741	2022NBT-31452 2022NBT-136045 Dairy_cattle_Rumen-3__c469 Goat_Cecum-5__c580760 Roe_deer_Rectum-3__c544047 Roe_deer_Rectum-5__c463651 Water_deer_Colon-4__c179993
VC798	42	91.35	78700	77000	0.505	0	2022NBT-20246 2022NBT-2768_1 Goat_Rumen-3__c285 2022NBT-34608_1 2022NBT-37711_1 2022NBT-45918 2022NBT-48613 Goat_Colon-2__c174210_1 Goat_Rectum-4__c209065 Goat_Rumen-5__c1031294 Roe_deer_Cecum-4__c2687_1 Roe_deer_Rectum-1__c274957 Sheep_Duodenum-3__c655965 Water_buffalos_Cecum-4__c399263 2022NBT-380_1 Sheep_Cecum-2__c174531 Sheep_Colon-1__c351_1 flye-goat_12787 flye-goat_2715_1 s3448.goat-hifiasm…
VC799	2	208.7	208.7	3080	0.06339	0.979387	Goat_Reticulum-5__c414376 Goat_Rumen-5__c288164
VC800	2	118.4	118.4	764	0.1336	0.658454	Goat_Rumen-1__c50053 contig_36592
VC801	3	456.5	1369	5528	0.1984	0.985452	Sheep_Cecum-3__c66114 Sheep_Colon-1__c180576 Sheep_Cecum-1__c42
VC802	2	106.1	106.1	905	0.1046	0.979387	Roe_deer_Colon-4__c2539 Sheep_Rectum-3__c468464
VC803	12	12.4	818.7	779.4	0.5047	2.97e-05	Goat_Rectum-5__c433316 Dairy_cattle_Cecum-5__c864519 Dairy_cattle_Colon-2__c177964 Dairy_cattle_Rectum-4__c72850 Goat_Cecum-2__c759374 Goat_Rumen-3__c644353 Roe_deer_Reticulum-1__c388633 Roe_deer_Reticulum-3__c5019 Sheep_Duodenum-4__c316885 Sheep_Reticulum-3__c971389 Sheep_Rumen-1__c1260216 Sheep_Rumen-3__c1385532
VC804	2	393.3	393.3	4944	0.07363	0.979387	2022NBT-35639 2022NBT-39290
VC805	2	10.27	10.27	248.4	0.03909	0.979387	2022NBT-39160 Sheep_Rectum-3__c481496
VC806	6	96.13	1442	5280	0.2141	0.885117	2022NBT-14138 2022NBT-46474 2022NBT-22604 2022NBT-61935 Roe_deer_Rumen-1__c13010 s5525.dairy-hifiasm005526l
VC807	2	495.6	495.6	4030	0.1094	0.979387	Goat_Rumen-4__c879434 flye-goat_21113
VC808	9	27.39	986.1	4134	0.1919	0.93334	Sheep_Rectum-1__c18461 Water_deer_Rectum-2__c382094 2022NBT-50276 2022NBT-43799 2022NBT-139702 2022NBT-94992 Goat_Colon-5__c98622 Sheep_Rectum-4__c386596 Water_deer_Cecum-1__c178956
VC809	3	11.09	33.26	2420	0.01352	0.985452	2022NBT-23172 contig_127445 s59465.dairy-hifiasm059471l
VC810	2	52.59	52.59	1840	0.02773	0.979387	2022NBT-37868 2022NBT-74582
VC811	4	77.9	467.4	2604	0.1518	0.992931	flye-goat_8388 flye-goat_8387 flye-goat_19870 flye-goat_12165
VC812	4	20.27	121.6	1447	0.07716	0.903035	2022NBT-68794 Goat_Rumen-4__c408 Water_deer_Colon-2__c223081 Water_buffalos_Rectum-4__c108853
VC813	2	179.4	179.4	1497	0.1068	0.979387	2022NBT-46121 2022NBT-54128
VC814	3	14.25	42.74	338.8	0.1103	0.985452	Roe_deer_Cecum-4__c162 flye-goat_16623 Water_buffalos_Cecum-5__c197190
VC815	70	74.31	180000	152000	0.541	0	2022NBT-35530 Roe_deer_Cecum-2__c187599 Water_deer_Rectum-1__c220_1 Roe_deer_Rectum-5__c443334 2022NBT-10793 2022NBT-646_1 Water_buffalos_Cecum-4__c7057 2022NBT-22441 2022NBT-11004_1 2022NBT-11106_1 2022NBT-1150_1 2022NBT-11825_1 2022NBT-1226_1 2022NBT-13547_1 2022NBT-13683_1 2022NBT-14118_1 2022NBT-14118_2 2022NBT-16281_1 2022NBT-18754_1 2022NBT-19217_1 2022NBT-20463_1 2022NBT-21956_1 2022NBT-26…
VC816	9	14.74	530.6	2968	0.1509	0.994778	2022NBT-13613_1 2022NBT-1080_1 2022NBT-24228 2022NBT-54897 2022NBT-54940_1 Goat_Rectum-5__c432068_1 Sheep_Abomasum-4__c388158 Water_buffalos_Rumen-1__c86321_1 Water_deer_Colon-4__c30778
VC817	2	260.5	260.5	6010	0.04151	0.979387	flye-goat_20463 Goat_Reticulum-5__c31330
VC818	9	17.43	627.7	4070	0.1331	0.997641	flye-goat_4410 flye-goat_19139 flye-goat_8935 flye-goat_912 s8768.goat-hifiasm008925l flye-goat_18702 flye-goat_2507 flye-goat_9346 s20738.goat-hifiasm020988l
VC819	2	19.32	19.32	251.1	0.07039	0.979387	s19975.goat-hifiasm020218l Goat_Rectum-2__c258609
VC820	9	213.1	7671	12200	0.3865	0.0260294	Enterobacteria~phage~phiP27 2022NBT-46883 2022NBT-13355_1 2022NBT-54052_1 Enterobacteria~phage~SfV Salmonella~phage~118970_sal3 Salmonella~phage~ST64B Shigella~phage~SfII Shigella~phage~SfIV
VC821	26	81.18	26400	46000	0.3644	0.101699	2022NBT-16471_1 2022NBT-18784_1 2022NBT-49173_1 2022NBT-49324_1 2022NBT-51125 2022NBT-51746 2022NBT-55762 2022NBT-58328_1 2022NBT-88343 Enterobacteria~phage~cdtI Enterobacteria~phage~mEp460 Enterobacteria~phage~phiP27 Escherichia~phage~2H10 Phage~Gifsy-1 Phage~Gifsy-2 Salmonella~phage~Fels-1 Stx2-converting~phage~Stx2a_WGPS2 2022NBT-46883 2022NBT-13355_1 2022NBT-54052_1 Enterobacteria~phage~SfV S…
VC822	21	84.62	17800	4567	0.7941	1.57e-08	2022NBT-35511_1 2022NBT-16058_1 2022NBT-55731_1 2022NBT-61958 Dairy_cattle_Jejunum-1__c134483 Goat_Duodenum-1__c103500 Goat_Duodenum-1__c77295 Goat_Jejunum-1__c325239 Roe_deer_Jejunum-3__c1311 Salmonella~phage~SEN34 Sheep_Duodenum-5__c122155_1 Sheep_Rumen-3__c788557 Yak_Duodenum-3__c226421 Yak_Jejunum-5__c291598 flye-dairy_66100 flye-dairy_81293 s18596.dairy-hifiasm018598l s39115.dairy-hifiasm039…
VC823	3	173.6	520.7	234.3	0.6842	0.0404278	Acinetobacter~phage~YMC/09/02/B1251 Acinetobacter~phage~YMC11/11/R3177 Acinetobacter~phage~vB_AbaS_TRS1
VC824	5	170.9	1709	3332	0.3384	0.265435	Pseudomonas~phage~YMC11/02/R656 Pseudomonas~phage~JBD44 Pseudomonas~virus~D3 Pseudomonas~virus~PMG1 Pseudomonas~phage~PAJU2
VC825	37	127.5	84900	98000	0.464	7.43e-08	2022NBT-16471_1 2022NBT-49324_1 2022NBT-51746 2022NBT-55762 2022NBT-58328_1 2022NBT-88343 Enterobacteria~phage~2851 Enterobacteria~phage~BP-4795 Enterobacteria~phage~O276 Enterobacteria~phage~YYZ-2008 Enterobacteria~phage~cdtI Enterobacteria~phage~mEp237 Enterobacteria~phage~mEp460 Escherichia~phage~2H10 Escherichia~phage~DE3 Escherichia~phage~HK629 Escherichia~phage~HK630 Escherichia~phage~JLK-2…
VC826	9	113.1	4072	4700	0.4632	0.000998845	Pseudomonas~phage~JBD44 Pseudomonas~phage~YMC11/07/P54_PAE_BP Pseudomonas~phage~phi297 Water_deer_Abomasum-5__c120190 flye-dairy_54274 flye-dairy_79670 Pseudomonas~virus~D3 Pseudomonas~virus~PMG1 Pseudomonas~phage~PAJU2
VC827	17	223.6	30400	47500	0.3902	0.00795339	Enterobacteria~phage~mEp235 Enterobacterial~phage~mEp390 Enterobacteria~phage~HK140 Enterobacteria~phage~mEp043~c-1 Enterobacteria~phage~mEp213 Escherichia~phage~ECP1 Escherichia~phage~HK106 Escherichia~phage~HK446 Escherichia~phage~HK542 Escherichia~phage~HK544 Escherichia~phage~HK633 Escherichia~phage~HK75 Escherichia~phage~HK97 Escherichia~phage~mEp234 Escherichia~phage~mEpX1 Escherichia~phage…
VC828	28	146.5	55400	76700	0.4192	0.00163346	2022NBT-49324_1 2022NBT-51746 2022NBT-55762 2022NBT-58328_1 2022NBT-88343 Enterobacteria~phage~O276 Enterobacteria~phage~cdtI Enterobacteria~phage~mEp237 Enterobacteria~phage~mEp460 Escherichia~phage~2H10 Escherichia~phage~DE3 Escherichia~phage~HK629 Escherichia~phage~HK630 Escherichia~phage~Lambda_ev017 Escherichia~phage~Lambda_ev099 Escherichia~phage~Lambda_ev207 Escherichia~phage~Lambda_ev243 …
VC829	7	98.6	2071	14100	0.1276	0.998917	Erwinia~phage~vB_EhrS_49 Mannheimia~phage~vB_MhS_1152AP2 Mannheimia~phage~vB_MhS_535AP2 Mannheimia~phage~vB_MhS_587AP2 Cronobacter~phage~ENT47670 2022NBT-48415_1 Erwinia~phage~vB_EhrS_59
VC830	3	53.89	161.7	207.3	0.4312	0.187913	Idiomarinaceae~phage~1N2-2 Marinomonas~phage~P12026 Pseudoalteromonas~phage~Pq0
VC831	3	311.6	934.9	4511	0.1715	0.985452	Mannheimia~phage~vB_MhS_1152AP2 Mannheimia~phage~vB_MhS_535AP2 Mannheimia~phage~vB_MhS_587AP2
VC832	9	194.8	7014	1536	0.8186	0.000206148	Klebsiella~phage~JD001 Klebsiella~phage~vB_KpnM_KpV79 Edwardsiella~phage~MSW-3 Edwardsiella~phage~PEi21 Klebsiella~phage~vB_KpnM_KpV52 Pectinobacterium~phage~PEAT2 Vibrio~phage~CP-T1 Vibrio~phage~vB_VchM-138 Iodobacter~phage~PhiPLPE
VC833	2	20.79	20.79	251.2	0.07533	0.979387	Pseudomonas~phage~phiPSA1 Water_deer_Ileum-3__c119672
VC834	6	302.5	4538	4645	0.4935	0.00253743	Dairy_cattle_Jejunum-1__c38255 Roe_deer_Jejunum-3__c856 Yak_Duodenum-1__c351613 Yak_Duodenum-1__c370825 flye-dairy_69637 flye-dairy_14804
VC835	25	350.9	105000	58800	0.6414	0	Shigella~phage~75/02~Stx Shigella~phage~POCJ13 Escherichia~phage~933W Escherichia~phage~Min27 Escherichia~phage~PA28 Escherichia~phage~vB_EcoP_24B Stx~converting~phage~vB_EcoS_P27 Stx~converting~phage~vB_EcoS_ST2-8624 Stx1~converting~phage~AU5Stx1 Stx1~converting~phage~AU6Stx1 Stx2-converting~phage~86 Stx2-converting~phage~Stx2a_F451 Stx2-converting~phage~Stx2a_WGPS9 Enterobacteria~phage~VT2-Saka…
VC836	3	119.6	358.9	2824	0.1125	0.985452	Sheep_Rectum-4__c808383_1 Yak_Cecum-2__c74244 Goat_Colon-4__c348440
VC837	53	89.73	124000	84600	0.5934	0	2022NBT-3226_1 Goat_Jejunum-1__c45546 Goat_Jejunum-2__c215395_1 Goat_Jejunum-3__c24496 Goat_Rumen-2__c315994 Goat_Rumen-3__c827407_1 Goat_Rumen-5__c122077_1 Roe_deer_Colon-2__c5_1 Roe_deer_Jejunum-1__c71895 Roe_deer_Jejunum-1__c776 Roe_deer_Jejunum-3__c1097_1 Roe_deer_Rectum-2__c1712 Roe_deer_Rectum-2__c353 Roe_deer_Rectum-3__c2133 Roe_deer_Rectum-3__c2159 Roe_deer_Rumen-3__c79887 Roe_deer_Rumen-…
VC838	2	159.9	159.9	697.5	0.1856	0.658454	2022NBT-60057 2022NBT-67388
VC839	3	170.8	512.5	551.7	0.4789	0.0404278	2022NBT-60186 2022NBT-60430 2022NBT-61136
VC840	16	40.85	4903	6923	0.4134	0.0112985	2022NBT-19066_1 Goat_Cecum-2__c375288_1 Goat_Reticulum-2__c91847_1 Roe_deer_Rectum-3__c1011_1 2022NBT-14074_1 2022NBT-49321_1 2022NBT-49820 2022NBT-57477 Roe_deer_Cecum-1__c120575 Sheep_Rectum-1__c89453 Water_buffalos_Colon-5__c203646 Yak_Rectum-1__c681248 Yak_Rectum-1__c976426 Yak_Rectum-4__c507197 Yak_Rectum-5__c147481 Yak_Rectum-5__c298638
VC841	4	177.5	1065	8372	0.1128	0.903035	Goat_Cecum-5__c652967 Goat_Rectum-1__c595_1 Sheep_Colon-1__c395998_1 Water_buffalos_Cecum-4__c47746
VC842	9	175.8	6329	22900	0.2165	0.997641	s67630.dairy-hifiasm067639l s37823.dairy-hifiasm037827l_1 flye-dairy_73855 s18269.dairy-hifiasm018271l s12814.dairy-hifiasm012815l flye-dairy_19717 s27644.dairy-hifiasm027646l s39350.dairy-hifiasm039355l s78058.dairy-hifiasm078071l
VC843	4	159.1	954.8	7652	0.1108	0.984809	Sheep_Rumen-4__c530612 flye-dairy_51372 Sheep_Abomasum-4__c67649 contig_120721
VC844	16	58.98	7078	38500	0.1551	0.999978	Water_deer_Colon-3__c106065_1 2022NBT-4994_1 Roe_deer_Reticulum-5__c252 Roe_deer_Rumen-5__c1642 Sheep_Cecum-5__c356631_1 Water_buffalos_Cecum-1__c280390_1 flye-dairy_54718 2022NBT-23531_1 2022NBT-72761 2022NBT-87207 Roe_deer_Colon-4__c42021_1 Roe_deer_Rectum-1__c25631 Roe_deer_Reticulum-2__c1365 Sheep_Abomasum-1__c130611 Sheep_Rumen-3__c806293_1 Water_deer_Rumen-5__c860
VC845	28	101.1	38200	19000	0.6678	0	Yak_Duodenum-3__c320792 Roe_deer_Jejunum-1__c22346 flye-dairy_45373 Water_buffalos_Rumen-3__c107556 Dairy_cattle_Cecum-6__c577919 Dairy_cattle_Duodenum-1__c512125 Dairy_cattle_Duodenum-3__c1203 Dairy_cattle_Duodenum-3__c358017 Dairy_cattle_Duodenum-6__c125159 Dairy_cattle_Jejunum-2__c1354403 Goat_Duodenum-1__c91 Goat_Ileum-6__c73 Roe_deer_Rumen-5__c2510 Sheep_Duodenum-1__c35795 Sheep_Duodenum-5__…
VC846	4	142.7	856.5	2496	0.2549	0.843839	Yak_Rectum-1__c319505 Roe_deer_Rectum-1__c2504 Yak_Colon-3__c1090279 2022NBT-75384
VC847	2	180.5	180.5	3202	0.05329	0.979387	contig_173276 s1572.dairy-hifiasm001573l
VC848	2	600	600	1217	0.3295	0.658454	2022NBT-19370 2022NBT-14909
VC849	2	140.4	140.4	3298	0.0408	0.658454	2022NBT-21922 2022NBT-78758_1
VC850	2	457.6	457.6	848.4	0.3493	0.658454	2022NBT-28659 2022NBT-40428
VC851	5	15.56	155.6	353.5	0.2998	0.734565	Roe_deer_Rectum-5__c2861 Roe_deer_Colon-2__c344769 Roe_deer_Colon-4__c197324 Dairy_cattle_Rumen-3__c126381 2022NBT-130422
VC852	15	67.19	7055	27700	0.2026	0.999712	2022NBT-38992 2022NBT-22848 2022NBT-41086 2022NBT-34519 2022NBT-36326 2022NBT-38580 Roe_deer_Rectum-4__c3956 Sheep_Jejunum-5__c157891 Water_deer_Cecum-2__c285601 2022NBT-15184 2022NBT-32199 2022NBT-67227 Goat_Colon-4__c223450 Sheep_Rumen-1__c1248704 Sheep_Jejunum-2__c48133
VC853	25	8.286	2486	13400	0.1556	0.0967967	2022NBT-5229 Goat_Cecum-6__c495598 Roe_deer_Cecum-4__c418291 Sheep_Colon-3__c497850 2022NBT-111741 Goat_Colon-2__c134854 Roe_deer_Cecum-1__c345359 Sheep_Rectum-4__c464837 2022NBT-124538 2022NBT-142929 Dairy_cattle_Colon-5__c114514 Roe_deer_Colon-1__c841745 Roe_deer_Colon-4__c3630_1 Sheep_Rectum-3__c438516 Water_buffalos_Rectum-5__c189453 Water_deer_Colon-4__c139983 Water_deer_Rectum-5__c84171 Goa…
VC854	2	90.51	90.51	1358	0.0623	0.979387	2022NBT-93501 2022NBT-57091
VC855	2	81.98	81.98	235.6	0.2549	0.658454	Water_deer_Colon-2__c223081 Water_buffalos_Rectum-4__c108853
VC856	2	600	600	5665	0.09571	0.979387	Roe_deer_Cecum-3__c97 Roe_deer_Colon-3__c4990
VC857	3	34.58	103.7	681.2	0.1312	0.985452	Clostridium~phage~phiSM101 Clostridium~phage~PhiS63 Clostridium~phage~phi3626
VC858	4	156.3	937.7	3094	0.2321	0.969699	Yak_Omasum-5__c896833 Water_buffalos_Rumen-3__c643522 Yak_Omasum-3__c1115450 Yak_Rumen-3__c2983921
VC859	133	202.6	1780000	462000	0.7937	0	2022NBT-10281 2022NBT-10261 2022NBT-10321 2022NBT-10535 2022NBT-11699 2022NBT-13523 2022NBT-13783 2022NBT-13925 2022NBT-14419 2022NBT-17901 2022NBT-19091 2022NBT-5841 Dairy_cattle_Cecum-2__c248 Dairy_cattle_Cecum-2__c996740 Dairy_cattle_Colon-4__c968294 Dairy_cattle_Rectum-4__c919690 Dairy_cattle_Rumen-2__c2096905 Goat_Rumen-1__c10832 Roe_deer_Abomasum-4__c1923 Roe_deer_Cecum-1__c1463 Roe_deer_Ce…
VC860	125	166.9	1290000	457000	0.739	0	2022NBT-14268 2022NBT-14602 2022NBT-14812 2022NBT-14849 2022NBT-15394 2022NBT-15593 2022NBT-16055 2022NBT-16137 2022NBT-16307 2022NBT-17110 2022NBT-18952 2022NBT-23849 2022NBT-26995 Dairy_cattle_Cecum-2__c243 Dairy_cattle_Cecum-6__c102467 Dairy_cattle_Rectum-1__c124994 Dairy_cattle_Rectum-3__c607 Goat_Duodenum-1__c163500 Goat_Rumen-1__c809232 Goat_Rumen-2__c3400 Goat_Rumen-2__c45247 Goat_Rumen-2_…
VC861	18	212	32400	84900	0.2764	0.869317	2022NBT-15662 Roe_deer_Cecum-1__c74 Water_buffalos_Cecum-4__c68 Roe_deer_Rumen-5__c2260 2022NBT-15644 2022NBT-16721 Goat_Rumen-2__c3863 Roe_deer_Rumen-4__c2460 Sheep_Rumen-4__c358169 Sheep_Rumen-5__c4760 Water_buffalos_Rumen-1__c95605 Water_buffalos_Rumen-2__c1803085 Water_deer_Ileum-2__c78 flye-dairy_25122 flye-dairy_26335 flye-dairy_71165 s4627.dairy-hifiasm004628l_1 s683.goat-hifiasm000710c
VC862	131	119.4	1020000	240000	0.8085	0	2022NBT-17300 Dairy_cattle_Rectum-3__c619 Roe_deer_Cecum-1__c1008 Roe_deer_Cecum-2__c758 Roe_deer_Colon-1__c1612 Roe_deer_Rectum-4__c3910 Water_deer_Colon-2__c50357 Water_deer_Colon-4__c374334 Yak_Cecum-1__c914236 Yak_Cecum-3__c194297 Yak_Rectum-1__c213235 Yak_Rumen-4__c1238509 flye-dairy_11450 flye-dairy_80741 Roe_deer_Colon-4__c2913 Roe_deer_Rumen-2__c2191 Water_deer_Rectum-1__c118203 Yak_Cecum…
VC863	5	512.6	5126	46400	0.09947	0.996692	2022NBT-17468 2022NBT-18366 Water_deer_Cecum-2__c61109 2022NBT-18293 Water_buffalos_Rumen-1__c524310
VC864	53	226.5	312000	44200	0.8758	0	2022NBT-9424 Goat_Jejunum-6__c6136 Roe_deer_Cecum-1__c1668 Roe_deer_Cecum-3__c1706 Yak_Omasum-3__c1494872 Goat_Cecum-4__c917728 Roe_deer_Cecum-1__c1052 Roe_deer_Cecum-5__c4540 Roe_deer_Rectum-1__c461 Sheep_Colon-1__c196284 Roe_deer_Rectum-3__c392007 Sheep_Cecum-3__c48 Sheep_Rectum-3__c183144 Water_deer_Cecum-5__c930 Goat_Jejunum-3__c392966 Yak_Jejunum-5__c152 flye-dairy_80582 Water_deer_Colon-2__…
VC865	11	474.4	26100	207000	0.1118	0.999969	Goat_Rumen-1__c10832 Roe_deer_Omasum-2__c1779 Roe_deer_Rectum-2__c55807 Roe_deer_Rectum-3__c1268 Water_buffalos_Rectum-1__c778687 Yak_Omasum-5__c1145788 flye-dairy_30279 flye-dairy_47429 flye-dairy_75719 flye-dairy_80919 s12772.dairy-hifiasm012773l
VC866	28	254.1	96000	47100	0.6709	0	Roe_deer_Cecum-2__c304 Water_buffalos_Cecum-4__c222071 Water_buffalos_Cecum-4__c504799 Dairy_cattle_Colon-3__c25014 Dairy_cattle_Colon-4__c748 Dairy_cattle_Colon-4__c941 Dairy_cattle_Colon-5__c942531 Goat_Cecum-2__c21202 Goat_Cecum-2__c577730 Goat_Colon-2__c504912 Goat_Rectum-1__c294757 Roe_deer_Cecum-1__c1841 Roe_deer_Cecum-1__c23765 Roe_deer_Cecum-1__c778 Roe_deer_Colon-4__c421 Water_buffalos_C…
VC867	9	321.4	11600	51900	0.1821	0.994778	Roe_deer_Colon-5__c1400 Roe_deer_Colon-1__c2781 Roe_deer_Rectum-2__c2178 Water_deer_Rectum-1__c302737 Roe_deer_Rectum-4__c4212 Yak_Colon-3__c765017 Yak_Rectum-1__c619376 Roe_deer_Cecum-1__c973 Roe_deer_Cecum-4__c2741
VC868	562	57.42	9050000	4490000	0.6682	0	Roe_deer_Duodenum-2__c235367 Roe_deer_Cecum-3__c1734 Dairy_cattle_Colon-5__c567274 Water_buffalos_Cecum-4__c159477 Roe_deer_Cecum-1__c451644 Roe_deer_Cecum-4__c511 Roe_deer_Rumen-5__c617 Yak_Rectum-1__c515309 flye-dairy_80122 Roe_deer_Colon-5__c1424 Goat_Cecum-4__c348 Roe_deer_Colon-3__c81921 Water_deer_Rumen-5__c582 Yak_Omasum-5__c428966 Yak_Rumen-4__c118910 s83470.dairy-hifiasm083483l flye-dair…
VC869	42	243.3	210000	63500	0.7672	0	Roe_deer_Colon-5__c1400 flye-dairy_56358 2022NBT-11606 Roe_deer_Colon-4__c1043 Roe_deer_Colon-4__c3177 Roe_deer_Rectum-2__c2178 Roe_deer_Rectum-4__c4212 Water_buffalos_Rectum-4__c9216 Yak_Colon-3__c765017 Yak_Rectum-1__c619376 flye-dairy_66830 Roe_deer_Cecum-1__c2 Roe_deer_Jejunum-1__c50 Roe_deer_Jejunum-4__c106 Roe_deer_Reticulum-4__c1505 Roe_deer_Rumen-1__c10842 Roe_deer_Rumen-5__c1308 Sheep_Ru…
VC870	14	128	11700	11800	0.4963	0.00698175	s1007.goat-hifiasm001048l 2022NBT-10411 2022NBT-10415 Goat_Ileum-2__c97520 Roe_deer_Cecum-1__c386 Roe_deer_Cecum-5__c4553 Sheep_Jejunum-1__c355 Water_deer_Rectum-1__c403780 Yak_Duodenum-3__c286095 Dairy_cattle_Jejunum-1__c415995 Sheep_Jejunum-2__c102104 Yak_Duodenum-1__c113041 Yak_Jejunum-5__c53169 flye-dairy_76760
VC871	29	113.7	46200	16400	0.7377	0	2022NBT-37982 2022NBT-102619 2022NBT-78457 2022NBT-79353 2022NBT-96163 Dairy_cattle_Duodenum-1__c229488 Dairy_cattle_Duodenum-1__c332345 Dairy_cattle_Duodenum-3__c343395 Dairy_cattle_Duodenum-3__c735482 Dairy_cattle_Jejunum-1__c566058 Dairy_cattle_Jejunum-2__c1352790 Dairy_cattle_Jejunum-2__c207109 Dairy_cattle_Rumen-2__c1338130 Goat_Jejunum-5__c60231 Roe_deer_Jejunum-3__c462 Sheep_Ileum-1__c1728…
VC872	19	109	18600	55500	0.2512	0.923719	2022NBT-38529_1 2022NBT-74982 2022NBT-76722 2022NBT-49492 2022NBT-55306 2022NBT-86216 2022NBT-92647 2022NBT-94456 2022NBT-99421 Sheep_Jejunum-1__c152366 2022NBT-68247 2022NBT-72367 Dairy_cattle_Duodenum-3__c477396 Goat_Jejunum-5__c9356 Sheep_Duodenum-4__c22 Sheep_Duodenum-4__c713 Sheep_Jejunum-2__c299 flye-dairy_63324 flye-dairy_70430
VC873	10	141.5	6368	36000	0.1501	0.998899	2022NBT-50880 2022NBT-53658 2022NBT-56407 Water_deer_Rumen-4__c266619 flye-dairy_77140 s42401.dairy-hifiasm042406l Goat_Ileum-6__c6882 flye-dairy_78206 s25003.goat-hifiasm025294l Water_buffalos_Rumen-1__c209671
VC874	15	97.99	10300	26200	0.2818	0.942506	2022NBT-74982 2022NBT-76722 Dairy_cattle_Jejunum-1__c303287 s80166.dairy-hifiasm080179l Sheep_Jejunum-1__c152366 Goat_Jejunum-5__c9356 Sheep_Duodenum-4__c22 Sheep_Duodenum-4__c713 Sheep_Jejunum-2__c299 Water_buffalos_Rumen-4__c45 Water_deer_Omasum-1__c140919 Yak_Duodenum-3__c54352 flye-dairy_63324 flye-dairy_70430 s9321.dairy-hifiasm009322l
VC875	6	170.2	2552	5038	0.3357	0.468093	Sheep_Duodenum-4__c202 Sheep_Jejunum-1__c838 Sheep_Jejunum-1__c891 Sheep_Rumen-1__c87721 Sheep_Colon-4__c225878 Sheep_Jejunum-4__c180
VC876	44	97.65	92400	7897	0.9204	0	Goat_Duodenum-1__c372148 Water_deer_Cecum-1__c349114 s35399.dairy-hifiasm035403l flye-dairy_36701 Dairy_cattle_Duodenum-3__c299 2022NBT-47316 2022NBT-47052 Dairy_cattle_Duodenum-3__c295567 Dairy_cattle_Duodenum-3__c35390 Dairy_cattle_Jejunum-1__c414356 Goat_Ileum-2__c103946 Goat_Jejunum-6__c97 Roe_deer_Jejunum-1__c383 Sheep_Duodenum-2__c17846 Sheep_Duodenum-5__c1 Sheep_Duodenum-5__c2974 Sheep_Ile…
VC877	66	41.83	89700	183000	0.3287	0.231167	Sheep_Ileum-5__c32001 s55028.dairy-hifiasm055033l Dairy_cattle_Duodenum-3__c601021 flye-dairy_48575 flye-dairy_64993 flye-dairy_76162 flye-dairy_78112 flye-dairy_79901 flye-dairy_79935 flye-dairy_80072 flye-dairy_80233 s16207.dairy-hifiasm016208l s35486.dairy-hifiasm035490l s40754.dairy-hifiasm040759c s42413.dairy-hifiasm042418c s45361.dairy-hifiasm045366l s48295.dairy-hifiasm048300c s51801.dairy…
VC878	29	116.2	47200	16400	0.7409	0	flye-dairy_81314 2022NBT-57667 2022NBT-59183 Water_deer_Abomasum-4__c43916 contig_164265 contig_170658 contig_29701 contig_33189 flye-dairy_13619 flye-dairy_18251 flye-dairy_62285 flye-dairy_67016 flye-dairy_73019 flye-dairy_75688 flye-dairy_80612 flye-dairy_80857 flye-dairy_80980 flye-dairy_81255 flye-dairy_81295 s18346.dairy-hifiasm018348l s29398.dairy-hifiasm029401c s40453.goat-hifiasm040864l …
VC879	2	106.7	106.7	892.1	0.1064	0.979387	2022NBT-30959 2022NBT-38998
VC880	2	21.72	21.72	699.7	0.02995	0.979387	Dairy_cattle_Rumen-2__c1147272 Water_buffalos_Cecum-4__c488676
VC881	3	157	470.9	4979	0.08632	0.985452	Goat_Omasum-4__c150240 Water_buffalos_Omasum-4__c876558 Water_buffalos_Rumen-1__c1042944
VC882	2	230.5	230.5	1632	0.1235	0.979387	Roe_deer_Duodenum-2__c882 Water_buffalos_Rumen-1__c1110438
VC883	40	289	226000	169000	0.5716	0	2022NBT-13340 2022NBT-31065 Dairy_cattle_Colon-5__c365263 Dairy_cattle_Reticulum-6__c1236477 Goat_Cecum-3__c23_1 Goat_Cecum-6__c495081 Roe_deer_Cecum-2__c532 Roe_deer_Cecum-3__c2549 Roe_deer_Colon-1__c695 Roe_deer_Colon-2__c1430 Roe_deer_Rectum-1__c702908 Roe_deer_Reticulum-2__c2136 Roe_deer_Rumen-2__c3840 Roe_deer_Rumen-2__c4156 Sheep_Abomasum-5__c361741 Sheep_Duodenum-4__c81662 Sheep_Omasum-3__…
VC884	26	257.7	83700	64000	0.5665	0	2022NBT-10456 2022NBT-12980 2022NBT-13142 2022NBT-13240 2022NBT-13442 2022NBT-14529 Roe_deer_Cecum-4__c2455 Roe_deer_Cecum-5__c3259 Sheep_Rectum-2__c729416 Water_buffalos_Cecum-4__c314633 Water_buffalos_Cecum-4__c674180 Water_buffalos_Colon-5__c275133 Water_deer_Colon-2__c338018 Yak_Cecum-4__c337000 Yak_Colon-3__c337811 Roe_deer_Rumen-4__c2824 Roe_deer_Cecum-5__c3811 Water_buffalos_Colon-5__c6052…
VC885	5	536.8	5368	15200	0.2615	0.996692	Goat_Cecum-3__c21 Sheep_Rectum-3__c968461 Sheep_Rectum-4__c156800 Water_buffalos_Cecum-2__c702575 Water_deer_Cecum-1__c201813
VC886	2	246.7	246.7	3299	0.0695	0.979387	2022NBT-55695 2022NBT-76164
VC887	16	47.58	5710	7683	0.4253	0.000937542	2022NBT-27434_1 2022NBT-65690 2022NBT-64171 2022NBT-1201_1 2022NBT-3922_1 2022NBT-5480_1 2022NBT-64740 2022NBT-70147 Goat_Duodenum-3__c342047_1 Roe_deer_Cecum-1__c1683 Roe_deer_Cecum-5__c468283 Roe_deer_Colon-3__c496_1 Roe_deer_Jejunum-2__c109 Roe_deer_Rectum-3__c493161 Roe_deer_Rectum-3__c55039_1 s32011.dairy-hifiasm032014c
VC888	4	74.9	449.4	2245	0.1663	0.992931	Goat_Rumen-5__c670720 Roe_deer_Rectum-1__c483082 Sheep_Rumen-1__c542 Water_deer_Cecum-4__c585
VC889	4	56.07	336.4	1121	0.2296	0.557383	Water_buffalos_Colon-3__c223234 Water_buffalos_Rectum-3__c21332 contig_180200 s14290.dairy-hifiasm014291l
VC890	4	98.83	593	2655	0.1821	0.903035	2022NBT-20521_1 2022NBT-63757 Goat_Reticulum-3__c391835 s18159.goat-hifiasm018398l
VC891	2	286	286	1283	0.1818	0.979387	2022NBT-35957 2022NBT-31573
VC892	4	274.7	1648	6900	0.1926	0.992931	Water_deer_Rectum-1__c367097_1 2022NBT-21928_1 Goat_Colon-3__c106101 Goat_Cecum-6__c792151_1
VC893	101	93.98	475000	38000	0.9254	0	2022NBT-1758_1 2022NBT-103107 2022NBT-247_1 2022NBT-52647 2022NBT-94141 2022NBT-94457 2022NBT-96123 2022NBT-97013 Dairy_cattle_Cecum-2__c480949 Dairy_cattle_Cecum-2__c56751 Dairy_cattle_Cecum-2__c803729 Dairy_cattle_Cecum-4__c896465 Dairy_cattle_Cecum-5__c788636 Dairy_cattle_Cecum-6__c536952 Dairy_cattle_Colon-1__c52219 Dairy_cattle_Rectum-4__c438917 Goat_Cecum-2__c165867 Goat_Cecum-3__c458783 Go…
VC894	40	37.57	29300	19100	0.6043	0	flye-dairy_68276 flye-dairy_76935 s16629.dairy-hifiasm016630l Dairy_cattle_Duodenum-3__c1364 Dairy_cattle_Duodenum-3__c594527 Dairy_cattle_Jejunum-1__c544183 Roe_deer_Cecum-2__c2234 Roe_deer_Cecum-2__c2563 Yak_Abomasum-1__c411679 Yak_Duodenum-3__c329258 Yak_Jejunum-5__c179364 Yak_Rumen-5__c506234 flye-dairy_37666 flye-dairy_37667 flye-dairy_43696 flye-dairy_62126 flye-dairy_70601 flye-dairy_74396…
VC895	5	152.8	1528	3283	0.3169	0.338052	2022NBT-359_1 2022NBT-115912 2022NBT-98124 Roe_deer_Colon-5__c316783 Sheep_Colon-4__c633
VC896	13	87.5	6825	11400	0.3748	0.0324349	flye-dairy_68276 Dairy_cattle_Duodenum-3__c594527 Dairy_cattle_Jejunum-1__c544183 Roe_deer_Cecum-2__c2234 Yak_Abomasum-1__c411679 Yak_Jejunum-5__c179364 flye-dairy_62126 flye-dairy_70601 flye-dairy_74396 flye-dairy_77012 flye-dairy_77706 flye-dairy_77707 s41448.dairy-hifiasm041453l
VC897	3	171.9	515.7	2731	0.1586	0.985452	flye-dairy_80369 Goat_Duodenum-1__c796 Goat_Rumen-3__c877917
VC898	3	501.7	1505	2828	0.3469	0.191367	2022NBT-18491 2022NBT-19061 2022NBT-20405
VC899	2	3.28	3.28	409	0.007879	0.979387	2022NBT-20990 s76758.dairy-hifiasm076770l
VC900	3	130.3	390.8	3325	0.105	0.986587	2022NBT-25968 2022NBT-30994 2022NBT-36141
VC901	2	98.99	98.99	3599	0.02674	0.658454	2022NBT-30311 2022NBT-65233_1
VC902	21	60.08	12600	20200	0.3835	0.0152555	Goat_Cecum-3__c244650 Goat_Rectum-1__c13505 Water_deer_Cecum-2__c432625 Goat_Cecum-1__c601474_1 s7324.goat-hifiasm007467l Roe_deer_Jejunum-2__c330 2022NBT-34269_1 2022NBT-82045 2022NBT-90983 Sheep_Ileum-5__c123 Sheep_Jejunum-2__c379 2022NBT-810_1 Dairy_cattle_Duodenum-2__c481034 Roe_deer_Abomasum-5__c252 s77957.dairy-hifiasm077970l Sheep_Jejunum-2__c803 Water_deer_Rectum-3__c392216 Yak_Jejunum-5_…
VC903	4	97.55	585.3	1273	0.3136	0.668441	Goat_Cecum-1__c10661 Goat_Rectum-1__c363778_1 Goat_Colon-4__c269947 Sheep_Rectum-1__c930974
VC904	5	16.46	164.6	922.5	0.15	0.734565	Goat_Omasum-1__c635894 Goat_Rumen-6__c471070 Sheep_Colon-1__c8274 Water_deer_Rectum-1__c268309 2022NBT-129957
VC905	4	109	654.1	777.5	0.4544	0.156161	Water_deer_Colon-1__c383677 Roe_deer_Cecum-5__c5807 Goat_Reticulum-3__c310669 s11865.goat-hifiasm012049l
VC906	2	20.61	20.61	113.7	0.149	0.979387	Goat_Colon-3__c317951 Water_buffalos_Cecum-4__c836503
VC907	6	164.2	2463	44000	0.05299	0.998474	Roe_deer_Colon-4__c1448 Roe_deer_Cecum-4__c2284 Sheep_Colon-1__c411250 2022NBT-51899 Roe_deer_Rectum-1__c2392 Roe_deer_Rectum-1__c288
VC908	8	6.681	187.1	1196	0.1337	0.948219	Water_buffalos_Colon-4__c24934 Water_buffalos_Rumen-1__c747624 Water_buffalos_Colon-5__c642760 Water_buffalos_Rectum-1__c648751 Roe_deer_Rumen-3__c358001 Goat_Omasum-3__c72754 Yak_Omasum-5__c852691 Yak_Reticulum-5__c712975
VC909	3	14.89	44.67	84.33	0.3309	0.33126	Yak_Colon-2__c808547 Dairy_cattle_Colon-1__c168217 Water_buffalos_Rectum-1__c1056854
VC910	2	239.2	239.2	2398	0.09057	0.979387	2022NBT-47571 2022NBT-47276
VC911	3	126.2	378.5	7384	0.04872	0.985452	2022NBT-52710 2022NBT-52912 2022NBT-58703
VC912	3	194.7	584.1	8270	0.06593	0.985452	flye-dairy_42660 flye-dairy_79643 s81895.dairy-hifiasm081908l
VC913	3	283.7	851.1	4414	0.1615	0.985452	Goat_Colon-1__c845789 Water_deer_Cecum-2__c97486 Water_deer_Rectum-1__c357289
VC914	4	47.85	287.1	1019	0.2185	0.903035	Roe_deer_Rectum-2__c65513 2022NBT-144765 2022NBT-35745 2022NBT-30664
VC915	6	39.36	590.4	5254	0.1008	0.998474	Sheep_Jejunum-2__c277992 contig_37854 contig_163 contig_144367 contig_82379 contig_83961
VC916	4	80.38	482.3	3454	0.1223	0.992931	Sheep_Rectum-3__c976585_1 Roe_deer_Cecum-4__c1512_1 Water_deer_Rectum-3__c400851 Roe_deer_Cecum-3__c78810_1
VC917	5	102.8	1028	3951	0.2061	0.952654	Water_deer_Rumen-1__c347758 s49788.dairy-hifiasm049793l s66913.dairy-hifiasm066922c flye-dairy_71220 s27246.dairy-hifiasm027248l
VC918	29	62.23	25300	88100	0.2228	0.999905	2022NBT-10336 2022NBT-11077 2022NBT-14009_1 2022NBT-15092 2022NBT-16251 2022NBT-17027 2022NBT-2067_1 2022NBT-21295 2022NBT-4172_1 Goat_Cecum-1__c1253_1 Goat_Cecum-2__c216075 Roe_deer_Rectum-4__c163158_1 Sheep_Colon-2__c147878 Sheep_Rectum-1__c240019 Water_buffalos_Colon-1__c717229 Water_deer_Cecum-3__c127_1 Water_deer_Rectum-1__c134481 Yak_Rectum-1__c838817 contig_46810 flye-dairy_25118 flye-dair…
VC919	2	600	600	2532	0.1913	0.979387	2022NBT-12783 Goat_Colon-6__c618567
VC920	11	168.4	9263	54300	0.1456	0.999848	2022NBT-13721 Goat_Rumen-2__c63850 Roe_deer_Jejunum-1__c35465 Roe_deer_Omasum-3__c1065 Roe_deer_Rumen-5__c270 Water_deer_Reticulum-3__c521 flye-dairy_28219 s1658.dairy-hifiasm001659l s1969.dairy-hifiasm001970l s6542.dairy-hifiasm006543c s788.dairy-hifiasm000789l
VC921	5	285.9	2859	26400	0.09767	0.996692	2022NBT-15236_1 Roe_deer_Colon-5__c1092 Goat_Colon-2__c616157_1 Water_deer_Cecum-1__c345877 Water_deer_Cecum-1__c170805
VC922	4	286	1716	7207	0.1921	0.943824	flye-dairy_13742 s17142.dairy-hifiasm017143l_1 s26496.dairy-hifiasm026498l_1 flye-dairy_48949
VC923	96	194.2	886000	245000	0.7833	0	2022NBT-15774 Dairy_cattle_Rectum-3__c903199 Goat_Colon-1__c729686 Roe_deer_Colon-5__c588 Roe_deer_Rectum-3__c81068 Water_buffalos_Cecum-2__c1088618 Yak_Colon-3__c30685 flye-dairy_11339 s19208.dairy-hifiasm019210l 2022NBT-14139_1 2022NBT-3427_1 Goat_Cecum-4__c766217 Roe_deer_Cecum-1__c1887 Roe_deer_Cecum-3__c231223 Roe_deer_Colon-5__c813 Sheep_Rectum-4__c152044 Water_buffalos_Cecum-1__c9 Water_de…
VC924	4	487	2922	16300	0.1518	0.992931	2022NBT-17973 flye-dairy_47143 flye-dairy_61604 s12626.dairy-hifiasm012627l
VC925	87	61.39	230000	126000	0.6464	0	2022NBT-10336 2022NBT-13721 2022NBT-16251 2022NBT-18559 Goat_Cecum-1__c1253_1 Goat_Cecum-2__c216075 Goat_Jejunum-4__c85132 Goat_Rumen-2__c434803 Goat_Rumen-2__c63850 Roe_deer_Cecum-4__c2372 Roe_deer_Cecum-5__c4120 Roe_deer_Colon-2__c1837 Roe_deer_Jejunum-1__c139069 Roe_deer_Jejunum-1__c35465 Roe_deer_Omasum-1__c974 Roe_deer_Omasum-2__c69 Roe_deer_Omasum-3__c1065 Roe_deer_Rumen-2__c2004 Roe_deer_R…
VC926	22	142.9	33000	25800	0.5607	7.23e-09	2022NBT-18649 Roe_deer_Jejunum-3__c1404 Yak_Rumen-4__c1837547 2022NBT-18801 2022NBT-21637 Dairy_cattle_Duodenum-1__c182152 Dairy_cattle_Duodenum-3__c2594 Sheep_Jejunum-1__c196693 Sheep_Jejunum-1__c25268 Sheep_Jejunum-2__c40261 Water_buffalos_Jejunum-2__c172 Yak_Cecum-1__c392868 Yak_Duodenum-1__c14136 Yak_Duodenum-3__c246750 flye-dairy_38635 flye-dairy_38636 flye-dairy_68386 flye-dairy_71265 flye-…
VC927	3	401.4	1204	9269	0.1149	0.985452	2022NBT-15089 2022NBT-24082 Dairy_cattle_Cecum-2__c871579
VC928	2	600	600	5963	0.09137	0.979387	Dairy_cattle_Colon-2__c55 Dairy_cattle_Rectum-6__c451394
VC929	6	112.3	1684	5777	0.2254	0.935897	Goat_Colon-3__c145430_1 Dairy_cattle_Cecum-2__c794302 contig_128524 flye-dairy_29225 s38853.dairy-hifiasm038858l contig_46876
VC930	2	196.4	196.4	4960	0.03806	0.979387	Goat_Jejunum-2__c10111_1 Roe_deer_Rumen-2__c4107
VC931	14	284.5	25900	50600	0.3382	0.418097	Goat_Jejunum-4__c85132 Water_buffalos_Rumen-4__c1744669 flye-dairy_21281 flye-dairy_57155 flye-dairy_75070 s116.dairy-hifiasm000117l s5375.dairy-hifiasm005376l Roe_deer_Reticulum-2__c1457 Sheep_Duodenum-1__c103 Sheep_Rumen-1__c137910 flye-dairy_59713 flye-dairy_66269 flye-goat_7384 s22714.dairy-hifiasm022716l
VC932	5	412.7	4127	12400	0.2497	0.952654	Goat_Rumen-2__c434803 Water_buffalos_Rumen-3__c1074239 contig_126480 flye-dairy_78596 s1373.dairy-hifiasm001374c
VC933	12	439	29000	21700	0.5713	1.83e-05	Roe_deer_Cecum-1__c642 2022NBT-10449_1 Sheep_Jejunum-1__c95 2022NBT-22879 2022NBT-9887 Goat_Duodenum-3__c133 Goat_Jejunum-5__c87 Roe_deer_Jejunum-1__c95 Water_deer_Omasum-1__c158578 Yak_Duodenum-3__c63 flye-dairy_8127 flye-goat_21039
VC934	4	398	2388	27500	0.07975	0.992931	Roe_deer_Cecum-3__c129693 Roe_deer_Rectum-2__c2469 Roe_deer_Rumen-5__c2988 s5417.dairy-hifiasm005418l
VC935	7	207.8	4365	4079	0.5161	0.00108251	Sheep_Jejunum-1__c355 Yak_Duodenum-3__c286095 Dairy_cattle_Jejunum-1__c415995 Sheep_Jejunum-2__c102104 Yak_Duodenum-1__c113041 Yak_Jejunum-5__c53169 flye-dairy_76760
VC936	9	355.8	12800	73100	0.1491	0.993291	Sheep_Omasum-3__c204394 Sheep_Reticulum-2__c781900 Water_deer_Rumen-1__c51 flye-dairy_33260 flye-dairy_55509 flye-dairy_79612 s3355.dairy-hifiasm003356c flye-dairy_26280 s19379.dairy-hifiasm019381l
VC937	4	466.8	2801	17400	0.1385	0.903035	Water_buffalos_Rumen-4__c1744669 flye-dairy_75070 Sheep_Duodenum-1__c103 Water_buffalos_Omasum-4__c1230498
VC938	5	41.55	415.5	3879	0.09651	0.996692	Geobacillus~virus~E3 Brevibacillus~phage~Sundance Bacillus~virus~SPbeta Bacillus~phage~vB_BanS-Tsamsa Staphylococcus~phage~SPbeta-like
VC939	2	61.26	61.26	1419	0.04126	0.979387	contig_90773 Yak_Rumen-4__c400938
VC940	7	100.6	2113	14800	0.1247	0.996355	contig_98214 flye-dairy_69767 s10891.dairy-hifiasm010892l s18989.dairy-hifiasm018991l s1969.dairy-hifiasm001970l s788.dairy-hifiasm000789l flye-dairy_58760
VC941	3	580.2	1741	7361	0.1911	0.986587	flye-dairy_41088 flye-dairy_71181 s8259.dairy-hifiasm008260l
VC942	5	356.5	3565	12700	0.2193	0.952654	flye-dairy_25662 s21678.dairy-hifiasm021680l s33360.dairy-hifiasm033364l flye-dairy_48084 flye-dairy_59690
VC943	15	200.7	21100	17900	0.5408	8.03e-06	flye-dairy_40779 flye-dairy_68178 s9706.dairy-hifiasm009707c flye-dairy_80099 s48040.dairy-hifiasm048045l Yak_Omasum-5__c690402 flye-dairy_29334 flye-dairy_40778 flye-dairy_45972 Water_buffalos_Rumen-5__c2501505 Dairy_cattle_Duodenum-5__c202485 Yak_Rumen-1__c2007981 Yak_Rumen-5__c1222333 Yak_Jejunum-5__c52074 contig_107410
VC944	7	14.89	312.8	3183	0.08912	0.999299	Sheep_Ileum-5__c97509 Roe_deer_Rectum-5__c530068 Roe_deer_Cecum-4__c1770 Sheep_Rectum-5__c183193 2022NBT-28505 2022NBT-78918 2022NBT-33362
VC945	3	348.4	1045	5060	0.171	0.985452	Sheep_Reticulum-5__c778774 Goat_Omasum-4__c179996 Goat_Rumen-4__c334092
VC946	3	201.9	605.6	445.7	0.5728	0.0404278	2022NBT-57905 2022NBT-57229 2022NBT-57807
VC947	8	24.17	676.9	1012	0.3969	0.0517809	Sheep_Rumen-4__c922350 Sheep_Rectum-3__c500376 Roe_deer_Colon-3__c78876 Goat_Reticulum-2__c113199 Roe_deer_Duodenum-2__c3628 Roe_deer_Rectum-3__c602296 Roe_deer_Rumen-5__c379968 Sheep_Rumen-4__c208982
VC948	4	8.198	49.19	476.8	0.09212	0.969699	s12914.dairy-hifiasm012915l Roe_deer_Colon-1__c571202 Water_buffalos_Rumen-5__c244039 2022NBT-75181
VC949	21	61.34	12900	7679	0.6252	2.4e-08	2022NBT-41287 Yak_Rectum-3__c216590 2022NBT-58995 2022NBT-60191 Water_deer_Cecum-5__c884 Yak_Rectum-4__c614020 Water_deer_Rectum-3__c202374 2022NBT-62159_1 Dairy_cattle_Rectum-4__c720742 Roe_deer_Cecum-3__c1464 Sheep_Rectum-3__c469079_1 Water_buffalos_Cecum-4__c516613 Water_buffalos_Rectum-1__c204531_1 Water_buffalos_Rectum-5__c557603 Yak_Omasum-4__c871553 Yak_Rumen-4__c499492 flye-dairy_25483 fl…
VC950	44	119	113000	41100	0.7323	0	2022NBT-67914 Roe_deer_Cecum-1__c763 Water_buffalos_Colon-3__c77423 Yak_Cecum-3__c138536 Yak_Cecum-3__c736059 Yak_Cecum-3__c861267 Yak_Rectum-1__c593176 Yak_Rectum-1__c754521 Yak_Rectum-5__c342806 2022NBT-64565 2022NBT-66611 Dairy_cattle_Colon-4__c285474 Dairy_cattle_Rectum-4__c548356 Water_buffalos_Colon-2__c415202 flye-dairy_75716 Water_buffalos_Colon-1__c673078 2022NBT-43715 2022NBT-63104 2022…
VC951	2	324.5	324.5	1814	0.1515	0.979387	2022NBT-23323 2022NBT-23753
VC952	2	23.57	23.57	1067	0.02153	0.979387	Goat_Omasum-3__c55406 Sheep_Rumen-4__c703046
VC953	7	53.44	1122	10300	0.09823	0.999299	2022NBT-23400 Sheep_Omasum-2__c737 2022NBT-26423 Goat_Omasum-2__c660851 Roe_deer_Rumen-3__c2339 Water_buffalos_Reticulum-3__c344779 Sheep_Reticulum-4__c522990
VC954	36	11.82	7449	29500	0.2015	0.75925	Sheep_Colon-4__c88631 Roe_deer_Cecum-2__c1518 Roe_deer_Rectum-2__c179413 Roe_deer_Cecum-3__c1470 Roe_deer_Rectum-1__c2086 2022NBT-118909 2022NBT-155747 Dairy_cattle_Cecum-2__c150207 Roe_deer_Cecum-4__c1338 Roe_deer_Cecum-4__c297249 Roe_deer_Colon-4__c63360 Roe_deer_Rectum-2__c301239 Roe_deer_Rectum-4__c126553 Sheep_Cecum-4__c476472 Sheep_Colon-1__c8274 Sheep_Colon-2__c759368 Sheep_Colon-3__c94650…
VC955	3	197.3	591.8	6968	0.07821	0.985452	Dairy_cattle_Rectum-4__c860096 Yak_Cecum-1__c600970 Dairy_cattle_Colon-5__c689337
VC956	2	480.3	480.3	6127	0.07264	0.979387	Goat_Abomasum-5__c423705 Goat_Abomasum-3__c340836
VC957	4	27.07	162.4	1189	0.1195	0.903035	flye-goat_2507 flye-goat_9346 s20738.goat-hifiasm020988l s35713.goat-hifiasm036086l
VC958	3	26.26	78.79	2187	0.03468	0.985452	contig_59804 contig_75152 contig_158341
VC959	3	281.1	843.3	2525	0.2499	0.985452	2022NBT-1037_1 2022NBT-61289 2022NBT-65974
VC960	9	10.51	378.4	4964	0.0706	0.999853	Sheep_Ileum-5__c97509 2022NBT-33249 Roe_deer_Rectum-5__c530068 Roe_deer_Cecum-4__c1770 Sheep_Rectum-5__c183193 2022NBT-28505 2022NBT-53484_1 2022NBT-78918 2022NBT-33362
VC961	7	33.48	703.1	9414	0.0694	0.999299	2022NBT-49585 Goat_Cecum-1__c1418 Roe_deer_Cecum-2__c102745 Sheep_Rumen-5__c992749 Water_buffalos_Colon-1__c890212 Water_deer_Abomasum-5__c91822 s2233.dairy-hifiasm002234l
VC962	7	71.73	1506	605.9	0.7085	0.00108251	Goat_Jejunum-3__c452809 2022NBT-54562 Roe_deer_Reticulum-5__c326912 Sheep_Rumen-5__c262 Goat_Rumen-2__c705201 Goat_Rumen-5__c1694 Roe_deer_Omasum-3__c48784
VC963	2	155	155	838	0.1554	0.979387	Roe_deer_Rumen-4__c3042 Roe_deer_Omasum-4__c154123
VC964	4	221.2	1327	1072	0.5513	0.0561756	Goat_Colon-3__c59449 Goat_Cecum-2__c112 Goat_Colon-4__c638655 Roe_deer_Cecum-5__c6018
VC965	4	136.6	819.7	7052	0.104	0.992931	Goat_Rectum-3__c215488 Roe_deer_Omasum-2__c2514 Roe_deer_Rectum-5__c2006 Roe_deer_Rumen-2__c2103_1
VC966	10	156.8	7057	27900	0.2015	0.994335	Roe_deer_Duodenum-2__c255399 Goat_Jejunum-2__c289907 Roe_deer_Rumen-2__c206967 Sheep_Colon-4__c738299 Sheep_Jejunum-2__c356079 Sheep_Omasum-2__c63775 Sheep_Omasum-3__c242495 Sheep_Rumen-1__c833217_1 Sheep_Rumen-2__c1180693_1 Sheep_Rumen-2__c572032_1
VC967	39	87.33	64700	43400	0.5981	0	Roe_deer_Cecum-1__c271424 Sheep_Abomasum-2__c99160 Sheep_Abomasum-5__c366766 Water_deer_Colon-4__c226503 Water_deer_Rectum-1__c405250 Goat_Rumen-1__c594621 Roe_deer_Omasum-2__c1949 flye-dairy_67007 flye-dairy_78237 Roe_deer_Rectum-4__c562086_1 contig_120530 Sheep_Duodenum-4__c76537 Dairy_cattle_Duodenum-1__c440067 Water_buffalos_Abomasum-1__c355088 Dairy_cattle_Duodenum-1__c154554 Dairy_cattle_Du…
VC968	2	244.9	244.9	558	0.3035	0.658454	2022NBT-32741 2022NBT-43949
VC969	37	99.33	66200	32900	0.6673	0	2022NBT-995_1 Dairy_cattle_Duodenum-3__c517290 Goat_Colon-1__c603291 Goat_Reticulum-2__c198887 Roe_deer_Colon-1__c831601 Roe_deer_Omasum-2__c1081 Roe_deer_Rumen-2__c2546 Sheep_Abomasum-1__c500436 Sheep_Abomasum-1__c90991 Sheep_Abomasum-4__c243553 Sheep_Abomasum-5__c25665 Sheep_Abomasum-5__c397593 Sheep_Jejunum-2__c328256 Sheep_Omasum-2__c18 Sheep_Omasum-2__c409517 Sheep_Rectum-2__c204718 Sheep_Re…
VC970	65	151.5	315000	55900	0.8491	0	Goat_Colon-5__c211784 Roe_deer_Rectum-4__c439244 2022NBT-3106_1 2022NBT-12792_1 2022NBT-53798 Dairy_cattle_Cecum-4__c913380 Dairy_cattle_Cecum-5__c308 Goat_Cecum-3__c659454 Goat_Ileum-2__c145612 Goat_Ileum-2__c96910 Goat_Ileum-6__c148739 Goat_Reticulum-1__c507989 Goat_Reticulum-5__c438758 Goat_Rumen-2__c454183 Goat_Rumen-4__c694_1 Roe_deer_Abomasum-2__c57634 Roe_deer_Cecum-1__c425025 Roe_deer_Jej…
VC971	3	138.6	415.9	808.4	0.338	0.33126	s1987.goat-hifiasm002057l_2 Roe_deer_Colon-1__c451 Roe_deer_Rumen-2__c426354
VC972	2	100.7	100.7	81.76	0.5401	0.110336	Water_buffalos_Cecum-5__c143 Water_buffalos_Cecum-5__c429270
VC973	6	33.55	503.3	472.4	0.5095	0.0634347	Goat_Jejunum-1__c54912 Sheep_Rumen-3__c805828 Water_buffalos_Omasum-4__c662934 Dairy_cattle_Jejunum-2__c1759651 Sheep_Duodenum-3__c328536 flye-dairy_80216
VC974	3	56.95	170.9	2349	0.06765	0.985452	Goat_Rumen-5__c1035761 Sheep_Duodenum-2__c132117 Goat_Rumen-5__c963421_1
VC975	2	75.74	75.74	362.3	0.1713	0.658454	Sheep_Abomasum-4__c388158 Water_deer_Colon-4__c30778
VC976	2	184	184	2240	0.0758	0.979387	2022NBT-30630 Water_deer_Colon-1__c192089
VC977	2	47.24	47.24	1257	0.03611	0.979387	Goat_Cecum-3__c546193 contig_30848
VC978	2	33.12	33.12	1735	0.01869	0.979387	Sheep_Colon-1__c237737 Goat_Cecum-6__c164889
VC979	2	54.58	54.58	686.1	0.07329	0.979387	Sheep_Rectum-4__c578135 2022NBT-34075
VC980	2	183.8	183.8	1562	0.105	0.979387	Water_deer_Abomasum-5__c346 Sheep_Abomasum-2__c136561
VC981	6	32.52	487.7	1456	0.2494	0.65554	Goat_Rumen-5__c670720 Roe_deer_Cecum-4__c388914 Roe_deer_Rectum-1__c483082 Sheep_Rumen-1__c542 Goat_Cecum-1__c72352_1 Water_deer_Rectum-3__c257581
VC982	2	44.41	44.41	353.2	0.1106	0.979387	Sheep_Duodenum-3__c586457 contig_170082
VC983	11	77.6	4268	11000	0.2792	0.837682	s32489.dairy-hifiasm032492l Dairy_cattle_Duodenum-3__c252009 Yak_Jejunum-5__c344199 s35692.dairy-hifiasm035696l Dairy_cattle_Duodenum-3__c282542 Yak_Jejunum-5__c338477 Sheep_Ileum-1__c60257 Dairy_cattle_Jejunum-2__c1360441 Sheep_Duodenum-4__c842 Water_buffalos_Rectum-1__c880465 Yak_Duodenum-1__c355895
VC984	3	402	1206	132.5	0.897	0.0404278	Roe_deer_Cecum-5__c2644 Sheep_Colon-3__c802521 Water_buffalos_Cecum-4__c871690
VC985	4	52.81	316.9	186.9	0.6192	0.0295359	Roe_deer_Colon-4__c454691 Roe_deer_Rumen-3__c324 Water_deer_Omasum-2__c88456 Water_deer_Rumen-5__c249985
VC986	8	155.7	4358	9529	0.3135	0.318251	flye-dairy_52395 flye-dairy_51830 Sheep_Omasum-1__c796678 flye-dairy_51829 s34237.dairy-hifiasm034241l flye-dairy_57557 flye-dairy_65306 s31666.dairy-hifiasm031669l
VC987	6	204.5	3068	2810	0.5208	0.00653261	Goat_Duodenum-6__c147507 s64798.dairy-hifiasm064806l Sheep_Rumen-5__c996951 Roe_deer_Omasum-2__c1937 Roe_deer_Abomasum-4__c171233 Roe_deer_Rumen-5__c401797
VC988	24	159.9	44100	26700	0.6228	1.56e-09	Dairy_cattle_Jejunum-2__c306 Sheep_Abomasum-4__c645255 Sheep_Ileum-4__c35325 Sheep_Jejunum-1__c67946 Sheep_Jejunum-2__c240630 contig_134284 flye-dairy_33797 flye-dairy_43280 flye-dairy_50830 flye-dairy_53876 flye-dairy_54505 flye-dairy_73563 flye-dairy_79022 flye-dairy_79597 flye-dairy_79652 flye-dairy_79671 s23587.dairy-hifiasm023589c s26358.dairy-hifiasm026360c s35932.dairy-hifiasm035936c s4715…
VC989	13	201.5	15700	3839	0.8027	8.25e-06	Water_deer_Rumen-4__c238480 Roe_deer_Cecum-2__c1557 Roe_deer_Cecum-1__c2442 Roe_deer_Cecum-3__c297470 Roe_deer_Rumen-5__c2108 Water_deer_Rectum-1__c210694 Water_deer_Rumen-5__c287178 flye-dairy_80137 Yak_Cecum-1__c1085177 Yak_Rumen-5__c280166 flye-dairy_62287 flye-dairy_74846 s2454.dairy-hifiasm002455l
VC990	14	145.5	13200	11100	0.5426	8.69e-06	flye-dairy_69694 s74397.dairy-hifiasm074408c s81776.dairy-hifiasm081789l Goat_Rumen-2__c374153 Sheep_Rumen-4__c58276 flye-dairy_17166 flye-dairy_55285 flye-dairy_64303 flye-dairy_67822 s74732.dairy-hifiasm074743l s8190.dairy-hifiasm008191l Sheep_Rumen-3__c274321 s40005.dairy-hifiasm040010l s77514.dairy-hifiasm077526l
VC991	4	352.9	2117	1836	0.5345	0.0151914	Yak_Rectum-5__c931207 Water_deer_Rectum-5__c605 Yak_Jejunum-5__c291413 s1878.goat-hifiasm001947l
VC992	6	244.3	3664	13700	0.2112	0.998474	2022NBT-26099 2022NBT-27104 2022NBT-31464 Goat_Jejunum-3__c265040 flye-dairy_59574 flye-dairy_61767
VC993	2	550.1	550.1	8604	0.06007	0.979387	Water_buffalos_Cecum-5__c977425 Water_buffalos_Colon-5__c41631
VC994	9	485.3	17500	7972	0.6862	0.000206148	Dairy_cattle_Duodenum-3__c563521 Goat_Ileum-1__c285228 Goat_Rumen-6__c965 Roe_deer_Cecum-2__c2524 Roe_deer_Jejunum-3__c1305 Sheep_Rumen-5__c2950 Water_deer_Duodenum-5__c10460 Yak_Cecum-4__c355670 flye-dairy_78903
VC995	25	139.3	41800	38500	0.52	7.36e-09	Sheep_Rectum-3__c21294_1 Water_deer_Colon-1__c82 2022NBT-6164_1 2022NBT-6238_1 Dairy_cattle_Colon-1__c339933 Goat_Colon-3__c46810 Roe_deer_Cecum-4__c2399_1 Roe_deer_Rectum-3__c162044 Sheep_Duodenum-3__c467966 Sheep_Duodenum-5__c31493 Sheep_Rumen-1__c1401294_1 Sheep_Rumen-2__c721425 Sheep_Rumen-5__c9030_1 Yak_Rumen-2__c967248 flye-dairy_31269 flye-dairy_41656 flye-dairy_60179 flye-dairy_62859 flye…
VC996	8	379.3	10600	13700	0.4356	0.00269247	contig_86466 Roe_deer_Colon-4__c2841 Roe_deer_Cecum-3__c153064 s8851.dairy-hifiasm008852l flye-dairy_73059_1 flye-dairy_72589 s2298.dairy-hifiasm002299l flye-dairy_77514
VC997	4	188.4	1130	3967	0.2214	0.903035	contig_128524 flye-dairy_29225 s38853.dairy-hifiasm038858l contig_46876
VC998	3	402.6	1208	1124	0.5166	0.191367	Goat_Jejunum-6__c146964 s3295.goat-hifiasm003390l Sheep_Ileum-1__c68366
VC999	27	168.4	59100	31000	0.6557	0	Roe_deer_Cecum-2__c2070 Roe_deer_Cecum-1__c2302 Roe_deer_Cecum-1__c406 Roe_deer_Cecum-1__c691278 Roe_deer_Rectum-1__c226402 Roe_deer_Rectum-2__c1760 2022NBT-7924 Roe_deer_Rectum-4__c78838 Water_deer_Reticulum-2__c288208 flye-dairy_71344 s153.goat-hifiasm000155c s2508.goat-hifiasm002584l Roe_deer_Cecum-3__c1751 Roe_deer_Reticulum-3__c2181 Roe_deer_Rumen-2__c1804 Roe_deer_Rumen-5__c2220 Roe_deer_Ru…
VC1000	4	115.4	692.6	4410	0.1355	0.992931	Goat_Rumen-2__c2422 s26207.goat-hifiasm026509l Bacillus~phage~SP-15 Water_buffalos_Rumen-3__c1192748
VC1001	2	204.3	204.3	3457	0.05573	0.979387	flye-dairy_6314 s48140.dairy-hifiasm048145l
VC1002	4	10.53	63.15	307.8	0.1667	0.984809	Roe_deer_Rumen-3__c358001 Goat_Omasum-3__c72754 Yak_Omasum-5__c852691 Yak_Reticulum-5__c712975
VC1003	2	262.3	262.3	23.11	0.9063	0.110336	2022NBT-10921_1 2022NBT-10419_1
VC1004	2	20.64	20.64	302.2	0.06313	0.979387	2022NBT-30316 contig_84938
VC1005	2	20.1	20.1	474	0.04035	0.658454	2022NBT-44292 2022NBT-29188_1
VC1006	4	10.49	62.94	155.6	0.2778	0.667497	Roe_deer_Rumen-1__c69523 Water_deer_Cecum-2__c290167 Roe_deer_Rectum-4__c430890 Water_buffalos_Cecum-4__c10463_1
VC1007	2	52.48	52.48	1775	0.02865	0.979387	Roe_deer_Rumen-5__c133443 Water_deer_Rumen-3__c2170
VC1008	6	13.85	207.8	351.4	0.3637	0.235197	Water_deer_Cecum-3__c698870 Roe_deer_Colon-2__c606203 Sheep_Rectum-4__c921472_1 Goat_Colon-6__c257420 Sheep_Rectum-2__c622260_1 Water_deer_Rectum-3__c184570
VC1009	4	78.48	470.9	733.7	0.3883	0.0151914	Goat_Jejunum-3__c330804 Sheep_Omasum-2__c668415 flye-dairy_62857 s11639.dairy-hifiasm011640l
VC1010	8	81.54	2283	6198	0.2687	0.886427	Dairy_cattle_Omasum-4__c457990 Sheep_Rumen-1__c1380087 Water_buffalos_Cecum-3__c76849 Water_buffalos_Rumen-1__c603402 contig_11965 contig_32548 contig_34402 contig_76766
VC1011	3	332.2	996.7	1710	0.3674	0.33126	Sheep_Rectum-1__c1183 Sheep_Rectum-1__c903339_1 Yak_Colon-3__c667021
VC1012	35	241.7	144000	237000	0.3781	0.0100166	2022NBT-4684 Dairy_cattle_Colon-5__c48 Roe_deer_Colon-4__c471 2022NBT-7729 Dairy_cattle_Cecum-4__c1014741 Goat_Cecum-3__c11 Goat_Cecum-4__c420 Goat_Cecum-5__c2093 Roe_deer_Cecum-4__c1177 Roe_deer_Rectum-2__c2398 Sheep_Colon-1__c130555 Sheep_Rectum-1__c166622 Sheep_Rectum-1__c762 Water_buffalos_Cecum-5__c88 Water_buffalos_Colon-3__c43412 Water_buffalos_Rectum-3__c507505 Water_deer_Rectum-3__c33032…
VC1013	2	600	600	18100	0.03216	0.979387	2022NBT-13132 2022NBT-14564
VC1014	4	418.7	2512	18000	0.1223	0.992931	2022NBT-16326_1 2022NBT-22593 2022NBT-29_1 Goat_Colon-5__c383098_1
VC1015	17	115.9	15800	77900	0.1683	0.999397	Sheep_Colon-2__c398045 2022NBT-12468 Dairy_cattle_Rectum-3__c739943 Goat_Cecum-1__c1360 Roe_deer_Cecum-5__c1365 Sheep_Rectum-1__c1336 Water_buffalos_Rectum-4__c37242 Goat_Colon-2__c480384 Sheep_Colon-2__c246825 Sheep_Rectum-1__c537097 Water_deer_Rectum-3__c452175 Water_buffalos_Rectum-3__c479186 Yak_Rectum-5__c830121 Dairy_cattle_Colon-1__c16110 Dairy_cattle_Colon-5__c595085 Sheep_Colon-2__c86052…
VC1016	8	186.6	5226	64500	0.07493	0.999679	Water_deer_Reticulum-2__c26 Water_deer_Rumen-3__c151 flye-dairy_22440 flye-dairy_52428 flye-goat_197 s798.dairy-hifiasm000799l Water_buffalos_Rumen-3__c1946298 Roe_deer_Duodenum-1__c389
VC1017	9	216.4	7792	67300	0.1038	0.999794	2022NBT-24182 2022NBT-6836 Goat_Colon-3__c662419 Goat_Rectum-3__c163 Goat_Rectum-3__c726 Water_buffalos_Cecum-4__c34490 Yak_Rectum-1__c110 Yak_Rectum-2__c238980 Yak_Rectum-5__c90839
VC1018	37	178.1	119000	27900	0.8093	0	2022NBT-16326_1 2022NBT-21994 2022NBT-29_1 Goat_Colon-5__c383098_1 Goat_Rumen-3__c540 Roe_deer_Abomasum-3__c29963_1 Roe_deer_Abomasum-5__c1468 Roe_deer_Colon-2__c481_1 Roe_deer_Rumen-4__c2411 Sheep_Abomasum-5__c397474 Sheep_Rectum-5__c818719 Sheep_Rumen-1__c487932_1 Sheep_Rumen-4__c204 Water_buffalos_Cecum-2__c127139 Water_buffalos_Omasum-1__c117284_1 Water_deer_Rumen-2__c242393 Yak_Cecum-1__c827…
VC1019	5	278.1	2781	25600	0.09813	0.996692	2022NBT-24182 Goat_Colon-3__c662419 Yak_Rectum-1__c110 Yak_Rectum-2__c238980 Yak_Rectum-5__c90839
VC1020	20	117.2	22300	64900	0.2553	0.992818	2022NBT-39234 2022NBT-12781_1 2022NBT-13126_1 2022NBT-23265_1 2022NBT-25276 2022NBT-32244 2022NBT-3313_2 2022NBT-390_1 2022NBT-43761_1 2022NBT-49343 2022NBT-58816 2022NBT-6514_1 2022NBT-65473 2022NBT-71718 2022NBT-73444 2022NBT-79020 2022NBT-87704 Sheep_Rectum-2__c346021_1 Water_deer_Cecum-1__c324_1 Water_deer_Cecum-4__c172031
VC1021	3	346.5	1040	16200	0.06021	0.985452	Roe_deer_Rectum-1__c80051 Water_deer_Rectum-4__c58678 Goat_Rectum-6__c130006
VC1022	3	51.95	155.9	2970	0.04977	0.985452	2022NBT-34711 2022NBT-40476 Water_buffalos_Cecum-3__c838215
VC1023	9	138	4970	19500	0.2033	0.535182	Goat_Omasum-4__c412149 contig_31334 contig_64919 flye-goat_19119 Dairy_cattle_Omasum-4__c457990 Water_buffalos_Cecum-3__c76849 Water_buffalos_Rumen-1__c603402 contig_32548 contig_76766
VC1024	9	10.79	388.3	6656	0.05498	0.968292	2022NBT-66639 Yak_Cecum-5__c186751 Yak_Rectum-5__c268374 Yak_Cecum-2__c740525 Dairy_cattle_Rectum-5__c346303 Yak_Rectum-1__c354854 Dairy_cattle_Colon-5__c783956 Dairy_cattle_Colon-6__c296586 Dairy_cattle_Rectum-4__c861923
VC1025	4	483	2898	71500	0.03897	0.992931	Dairy_cattle_Rectum-4__c132 Roe_deer_Omasum-4__c4433 Water_buffalos_Cecum-2__c24 Water_deer_Omasum-5__c326
VC1026	23	77.3	19600	63900	0.2342	0.993064	Roe_deer_Colon-1__c850 s5510.goat-hifiasm005630l Goat_Reticulum-3__c623998_1 Roe_deer_Abomasum-2__c1312 Sheep_Rumen-1__c352_1 Water_deer_Colon-5__c952 Water_deer_Reticulum-3__c1568 Water_deer_Rumen-1__c321_1 Yak_Abomasum-1__c1057262 Yak_Rumen-2__c1796749 Roe_deer_Abomasum-1__c56559 Roe_deer_Rectum-5__c3033_1 Water_deer_Cecum-3__c10_1 Yak_Cecum-5__c601286 Yak_Rectum-2__c334751 flye-goat_1928 flye-…
VC1027	40	85.56	66700	45200	0.596	0	Roe_deer_Reticulum-1__c2334 s3459.goat-hifiasm003555l flye-goat_4315 s8678.goat-hifiasm008833l flye-dairy_61979 Goat_Abomasum-6__c221393 Yak_Rumen-2__c1055723 Sheep_Abomasum-4__c793 Sheep_Rectum-2__c338172_1 Sheep_Rumen-3__c189261 Goat_Abomasum-3__c547536_1 flye-dairy_81285 Goat_Omasum-2__c574173_1 Goat_Omasum-4__c111705 Goat_Rumen-4__c709615_1 Sheep_Abomasum-1__c386988 Sheep_Omasum-2__c950897 Sh…
VC1028	2	189.8	189.8	6549	0.02815	0.979387	Roe_deer_Reticulum-2__c998 Sheep_Rumen-3__c13
VC1029	7	86.42	1815	13200	0.1208	0.994698	Roe_deer_Cecum-1__c811 Yak_Rectum-1__c256989 Goat_Colon-2__c178 Sheep_Rectum-3__c2008 Sheep_Rectum-5__c341867 Yak_Rectum-5__c156236 Water_deer_Rectum-3__c385017
VC1030	17	185.4	25200	45600	0.3559	0.15073	Roe_deer_Rectum-3__c2074_1 2022NBT-6601 2022NBT-29205 2022NBT-33574 Water_deer_Colon-4__c375652 2022NBT-27043_1 Goat_Omasum-6__c322495 Goat_Reticulum-4__c903_1 Goat_Rumen-5__c237066_1 Goat_Rumen-6__c697 Roe_deer_Abomasum-1__c64330 Roe_deer_Reticulum-4__c165503 Sheep_Omasum-3__c347306 Water_buffalos_Rumen-1__c645482_1 Water_deer_Rumen-1__c371414_1 flye-dairy_81317 flye-goat_4425_2
VC1031	3	255.8	767.3	6972	0.09906	0.985452	s9114.goat-hifiasm009273l Goat_Rumen-3__c2940 flye-goat_18501
VC1032	10	266.9	12000	10400	0.5366	0.00021982	s3967.goat-hifiasm004069l Goat_Rumen-2__c756928 Goat_Rumen-5__c572831 Roe_deer_Rectum-2__c2695 Roe_deer_Rumen-5__c2382 Water_buffalos_Colon-1__c621479 Water_buffalos_Omasum-1__c126333 Yak_Rumen-2__c1515544 flye-goat_19476 flye-goat_20800
VC1033	25	95.09	28500	44700	0.3893	0.00180467	Water_deer_Omasum-1__c125682 contig_46454 contig_91419 s17331.dairy-hifiasm017332l Water_buffalos_Rumen-1__c347955 s3944.dairy-hifiasm003945l Water_deer_Abomasum-3__c54728 Water_deer_Rectum-1__c417833 Water_buffalos_Rumen-3__c789912 Roe_deer_Omasum-4__c1716_1 Water_deer_Abomasum-5__c514_1 Yak_Cecum-4__c331911 flye-goat_272_2 Yak_Colon-4__c682109 s76266.dairy-hifiasm076278l Goat_Rumen-2__c308307 Y…
VC1034	10	118.8	5345	37900	0.1236	0.998899	Sheep_Rectum-5__c230939 Dairy_cattle_Colon-5__c798 Goat_Colon-1__c490564 Goat_Colon-3__c444694 Goat_Rectum-4__c382483 Sheep_Cecum-5__c26501 Water_buffalos_Rectum-3__c217832 Yak_Rectum-1__c887732 Water_buffalos_Cecum-2__c456622 Water_buffalos_Rectum-3__c144783
VC1035	6	41.97	629.6	11600	0.05141	0.998474	2022NBT-34711 2022NBT-40476 Goat_Colon-2__c365991 Water_buffalos_Cecum-3__c167694 Water_buffalos_Colon-3__c5 Water_buffalos_Cecum-3__c838215
VC1036	2	99.73	99.73	1381	0.06715	0.979387	Yak_Rumen-5__c257930 contig_149622
VC1037	6	48.11	721.7	7184	0.09116	0.998474	2022NBT-12672 flye-dairy_24112 Water_deer_Abomasum-2__c188564 Water_buffalos_Rumen-2__c2432607 s45704.dairy-hifiasm045709l s9989.dairy-hifiasm009990l
VC1038	30	64.85	28200	69400	0.2887	0.641406	Water_buffalos_Omasum-3__c441215 Water_buffalos_Omasum-3__c839609 Water_deer_Rumen-4__c98997 Water_deer_Rumen-5__c131499 Goat_Rectum-4__c205132 Water_buffalos_Cecum-1__c206070_1 Water_buffalos_Omasum-1__c289210 Water_buffalos_Rectum-3__c227664_1 Water_buffalos_Rumen-1__c157_1 s14838.goat-hifiasm015049l Water_buffalos_Abomasum-1__c455839 Water_buffalos_Omasum-1__c324655_1 Water_buffalos_Rumen-3__c…
VC1039	28	161.8	61100	21700	0.7376	0	Goat_Omasum-6__c166540 Goat_Rumen-3__c750908 Roe_deer_Rectum-2__c2921 Roe_deer_Reticulum-2__c177748 Roe_deer_Rumen-1__c14081 Roe_deer_Rumen-4__c2578 Roe_deer_Rumen-5__c4190 Sheep_Colon-2__c966695 Sheep_Colon-3__c524584 Sheep_Omasum-1__c274664 Sheep_Rectum-4__c803 Sheep_Rumen-3__c226033 Yak_Rumen-1__c1439320 Yak_Rumen-2__c1284859 Yak_Rumen-4__c335190 flye-dairy_61385 s29733.goat-hifiasm030067c Wat…
VC1040	3	84.53	253.6	4924	0.04893	0.985452	Water_buffalos_Reticulum-3__c626290 contig_61070 Goat_Omasum-2__c470709
VC1041	34	49.07	27500	38700	0.4151	8.52e-05	Roe_deer_Rumen-3__c1838 Water_deer_Omasum-5__c120770 flye-dairy_36437 s2751.goat-hifiasm002835l s98646.dairy-hifiasm098664l contig_27013 flye-dairy_4405 s14821.dairy-hifiasm014822l s59803.dairy-hifiasm059809l s62811.dairy-hifiasm062817l s87721.dairy-hifiasm087736l Roe_deer_Rumen-3__c2251 Roe_deer_Omasum-4__c1650 Roe_deer_Abomasum-5__c1572 Roe_deer_Abomasum-5__c1701 s27728.goat-hifiasm028042l s457…
VC1042	2	600	600	16500	0.03506	0.979387	flye-dairy_5412 s5687.dairy-hifiasm005688l
VC1043	2	409.3	409.3	5260	0.07214	0.979387	flye-goat_16881 s4686.goat-hifiasm004796l
VC1044	6	435.7	6536	14700	0.3075	0.984681	Dairy_cattle_Colon-3__c50789 Goat_Jejunum-2__c291690 Sheep_Duodenum-1__c515 Sheep_Jejunum-2__c4686 flye-dairy_65272 s3386.goat-hifiasm003482l
VC1045	5	146.7	1467	6054	0.1948	0.969949	Water_buffalos_Rumen-3__c185018 Dairy_cattle_Duodenum-3__c753474 Water_deer_Rumen-2__c5676 Yak_Duodenum-1__c299472 Yak_Rumen-2__c607034
VC1046	2	37.39	37.39	100.7	0.2631	0.658454	contig_120437 s68941.dairy-hifiasm068951l
VC1047	4	218.3	1310	7978	0.1409	0.903035	s52940.dairy-hifiasm052945l s21317.dairy-hifiasm021319l contig_133195 contig_134381
VC1048	37	53.98	36000	7092	0.8338	0	Dairy_cattle_Cecum-5__c61991 Water_deer_Rectum-1__c337644 2022NBT-93660 Dairy_cattle_Abomasum-5__c81816 Dairy_cattle_Duodenum-2__c345613 Goat_Jejunum-3__c361253 Goat_Jejunum-5__c171670 Goat_Rectum-1__c822045 Roe_deer_Rumen-1__c11012 Sheep_Duodenum-3__c377 Sheep_Rectum-1__c853591 Sheep_Rectum-1__c872221 Sheep_Rectum-3__c821111 Water_buffalos_Reticulum-4__c497937 Water_deer_Rectum-3__c240857 Water_…
VC1049	8	99.83	2795	2257	0.5515	0.000973763	2022NBT-518_1 Goat_Colon-1__c533116_1 Goat_Cecum-3__c684313 Sheep_Colon-2__c301278 Water_buffalos_Rectum-1__c630219 flye-goat_16520_1 flye-goat_3319_1 s18294.goat-hifiasm018533c
VC1050	3	51.28	153.8	816.4	0.1576	0.985452	Roe_deer_Cecum-1__c160348 Roe_deer_Rectum-2__c491698 Sheep_Colon-3__c281314
VC1051	7	109.2	2294	2325	0.4951	0.0075968	flye-goat_57_1 flye-goat_11028_1 flye-goat_6735 s1368.goat-hifiasm001418l_1 Sheep_Rumen-2__c1038111 s1392.goat-hifiasm001443l_1 s35559.goat-hifiasm035929l
VC1052	3	10.12	30.36	1225	0.02407	0.985452	Sheep_Cecum-2__c97494 Sheep_Cecum-1__c25981 Water_deer_Cecum-2__c62932
VC1053	2	39.72	39.72	527.9	0.06949	0.979387	Goat_Cecum-1__c440 2022NBT-78918
VC1054	2	55.3	55.3	301.1	0.1534	0.979387	Goat_Rumen-2__c424929 Goat_Ileum-4__c66585
VC1055	3	196.8	590.4	954.4	0.3807	0.0952151	2022NBT-28732 2022NBT-29269_1 2022NBT-57603
VC1056	17	42.35	5760	1711	0.7675	3.53e-07	2022NBT-28732 flye-dairy_42401 2022NBT-67145 2022NBT-29269_1 2022NBT-57603 2022NBT-64847 Dairy_cattle_Duodenum-3__c1439 Goat_Omasum-3__c486693_1 Sheep_Duodenum-2__c50741 Sheep_Duodenum-3__c163452 Yak_Rectum-3__c360869 flye-goat_15985_1 s12217.goat-hifiasm012405c s48192.dairy-hifiasm048197l s59690.dairy-hifiasm059696l s7173.dairy-hifiasm007174l s99890.dairy-hifiasm099909l
VC1057	2	123.7	123.7	1381	0.08198	0.979387	2022NBT-31004 2022NBT-74125
VC1058	2	79.53	79.53	1320	0.05667	0.979387	2022NBT-32004 2022NBT-61179
VC1059	2	224.6	224.6	2018	0.09999	0.979387	Goat_Abomasum-1__c233203 Goat_Rumen-5__c1673
VC1060	2	35.06	35.06	996.3	0.03387	0.979387	contig_106894 flye-goat_7667
VC1061	28	250.5	94700	49200	0.6579	0	2022NBT-14262_1 2022NBT-15767_1 2022NBT-30236 2022NBT-73119 Bacteriophage~P2 Bacteriophage~R18C Enterobacteria~phage~fiAA91-ss Erwinia~phage~EtG Escherichia~phage~186 Escherichia~phage~Wphi Escherichia~phage~pro147 Escherichia~phage~pro483 Escherichia~phage~vB_EcoM-12474III Escherichia~virus~P2-2H1 Escherichia~virus~P2-2H4 Escherichia~virus~P2-4A7b Escherichia~virus~P2-4B2 Escherichia~virus~P2-4C…
VC1062	36	105.8	66700	50800	0.5672	0	2022NBT-73782 Burkholderia~phage~AP3 Burkholderia~phage~FLC5 Burkholderia~phage~KL3 Burkholderia~phage~KS14 Burkholderia~phage~KS5 Burkholderia~phage~Mana Burkholderia~phage~ST79 Burkholderia~phage~phiE094 Burkholderia~phage~phiE12-2 Burkholderia~phage~phiE202 Burkholderia~virus~phi52237 Dairy_cattle_Duodenum-1__c156041_1 Erwinia~phage~ENT90 Escherichia~phage~500465-1 Klebsiella~phage~4LV2017 Kle…
VC1063	15	171.3	18000	19000	0.4862	4.05e-05	2022NBT-26146 2022NBT-33345 2022NBT-44226 2022NBT-71754 Enterobacter~phage~phiT5282H Enterobacteria~phage~P88 Escherichia~phage~500465-2 Escherichia~phage~503458 Escherichia~phage~520873 Escherichia~virus~P88-4B11 Klebsiella~phage~3LV2017 Salmonella~phage~SEN4 Salmonella~phage~SEN5 Klebsiella~phage~ST16-OXA48phi5.4 2022NBT-90180
VC1064	22	133.2	30800	6919	0.8155	7.22e-09	2022NBT-43308_1 Escherichia~phage~ESSI2_ev239 Salmonella~phage~SI7 2022NBT-68096 Aeromonas~phage~phiO18P Bacteriophage~K139 Cronobacter~phage~ESSI-2 Escherichia~phage~ESSI2_ev015 Escherichia~phage~ESSI2_ev040 Escherichia~phage~ESSI2_ev129 Haemophilus~virus~HP1 Haemophilus~virus~HP2 Pasteurella~phage~F108 Pseudoalteromonas~phage~C5a Pseudomonas~phage~phi3 Salinivibrio~phage~SMHB1 Vibrio~phage~1.20…
VC1065	20	136.2	25900	36500	0.4147	1.3e-05	Burkholderia~phage~AP3 Burkholderia~phage~FLC5 Burkholderia~phage~KL3 Burkholderia~phage~KS14 Burkholderia~phage~KS5 Burkholderia~phage~Mana Burkholderia~phage~ST79 Burkholderia~phage~phiE094 Burkholderia~phage~phiE12-2 Burkholderia~phage~phiE202 Burkholderia~virus~phi52237 Dairy_cattle_Duodenum-1__c156041_1 Pseudomonas~phage~Dobby Pseudomonas~phage~vB_Pae_BR319a Pseudomonas~virus~phiCTX Ralstoni…
VC1066	3	371.8	1115	9145	0.1086	0.985452	Mannheimia~phage~vB_MhM_1127AP1 Mannheimia~phage~vB_MhM_587AP1 Mannheimia~virus~PHL101
VC1067	13	63.43	4947	21900	0.1839	0.999756	2022NBT-58704 2022NBT-9370_1 Goat_Reticulum-3__c42842 Roe_deer_Rectum-4__c1624_1 Water_deer_Colon-4__c43183_1 Water_deer_Rectum-1__c286207 flye-dairy_79650 flye-goat_21304 flye-goat_2729_1 s12353.goat-hifiasm012541c s4027.dairy-hifiasm004028l s5517.goat-hifiasm005637l 2022NBT-33458_1
VC1068	11	144.8	7966	62400	0.1132	0.999969	2022NBT-12259 Sheep_Ileum-4__c1549 Sheep_Ileum-5__c156116 Sheep_Ileum-5__c89275 Sheep_Jejunum-2__c356509 Sheep_Jejunum-3__c167480 Sheep_Rumen-5__c1054113 Water_buffalos_Reticulum-1__c738493 Water_deer_Rectum-3__c510797 Yak_Rumen-3__c374404 Roe_deer_Rectum-4__c305711
VC1069	2	91.54	91.54	2665	0.03316	0.979387	Roe_deer_Rumen-5__c1800 Sheep_Ileum-4__c195809
VC1070	8	132.1	3700	29600	0.111	0.999679	Roe_deer_Rumen-5__c1800 Sheep_Ileum-5__c156116 Sheep_Ileum-5__c89275 Sheep_Jejunum-3__c167480 Sheep_Rumen-5__c1054113 Water_buffalos_Reticulum-1__c738493 Yak_Rumen-3__c374404 Roe_deer_Rectum-4__c305711
VC1071	5	44.77	447.7	5202	0.07911	0.996692	Roe_deer_Omasum-4__c5032 Sheep_Rectum-1__c459422 Goat_Colon-2__c585303 s42313.dairy-hifiasm042318l s9686.goat-hifiasm009851l
VC1072	12	56.4	3722	4034	0.4784	0.00147282	flye-dairy_71405 Roe_deer_Rumen-5__c3336 Goat_Rumen-1__c532612_1 Water_deer_Colon-4__c325_1 Water_buffalos_Rumen-1__c1056151_1 Roe_deer_Omasum-5__c124022_1 Roe_deer_Rumen-3__c132998 Sheep_Rumen-5__c3596 Goat_Duodenum-3__c15345 Sheep_Abomasum-1__c224455 Water_deer_Rectum-4__c129762_1 flye-goat_18263_1
VC1073	13	121.5	9476	8743	0.5194	8.25e-06	Dairy_cattle_Duodenum-3__c306085 Dairy_cattle_Duodenum-3__c414334 Roe_deer_Rectum-5__c548628_1 Roe_deer_Rumen-5__c407392 Sheep_Rumen-2__c804863 flye-dairy_54782 flye-dairy_64990 flye-dairy_71046 flye-dairy_79192 s47825.dairy-hifiasm047830l s81451.dairy-hifiasm081464l s85339.dairy-hifiasm085353l s85613.dairy-hifiasm085627l
VC1074	2	235.8	235.8	2246	0.09489	0.979387	2022NBT-22771 2022NBT-29220
VC1075	37	57.64	38400	2612	0.9346	0	2022NBT-106640 2022NBT-105064 2022NBT-107229 2022NBT-107805 2022NBT-108708 Dairy_cattle_Duodenum-3__c119786 Dairy_cattle_Duodenum-3__c418583 Dairy_cattle_Duodenum-3__c59696 Dairy_cattle_Duodenum-3__c803045 Dairy_cattle_Duodenum-3__c94580 Goat_Duodenum-1__c433870 Roe_deer_Ileum-4__c102 Roe_deer_Jejunum-1__c202745 Sheep_Duodenum-1__c41180 Sheep_Duodenum-2__c166502 Sheep_Duodenum-4__c265 Sheep_Duode…
VC1076	4	32.14	192.9	640.5	0.2292	0.903035	Goat_Jejunum-4__c191076 Goat_Jejunum-2__c201565 Sheep_Duodenum-2__c296529 Yak_Jejunum-5__c56857
VC1077	10	134.2	6037	3839	0.61	9.08e-05	Yak_Colon-2__c369803 Yak_Jejunum-5__c12177 Yak_Cecum-1__c196669 Yak_Jejunum-5__c140959 Yak_Jejunum-5__c142991 Yak_Jejunum-5__c236210 Yak_Jejunum-5__c267300 Yak_Jejunum-5__c359949 Yak_Jejunum-5__c83453 Yak_Rectum-1__c1062171
VC1078	2	99.73	99.73	493.2	0.1671	0.979387	2022NBT-38011_1 2022NBT-73017
VC1079	2	18.32	18.32	24.68	0.3897	0.658454	Sheep_Omasum-2__c67520 Sheep_Omasum-1__c679442
VC1080	5	2.982	29.82	482.5	0.05709	0.989214	Water_deer_Rectum-1__c42 Goat_Reticulum-4__c362537 s23095.goat-hifiasm023370l Goat_Rumen-1__c1469 Sheep_Rumen-1__c1140936
VC1081	5	41.63	416.3	1402	0.2277	0.969949	2022NBT-38649 2022NBT-61933_1 2022NBT-64877 2022NBT-73276 2022NBT-69020
VC1082	3	205.5	616.5	5817	0.09574	0.985452	Sheep_Duodenum-2__c110042 Yak_Jejunum-5__c225741 Yak_Omasum-5__c760196
VC1083	5	56.67	566.7	6444	0.08071	0.996692	2022NBT-40601 Dairy_cattle_Duodenum-3__c344360 Dairy_cattle_Rumen-1__c266969 Roe_deer_Jejunum-1__c95241 Water_buffalos_Cecum-1__c487334
VC1084	45	38.42	38000	22500	0.6271	0	Roe_deer_Rectum-1__c213821 2022NBT-31653_1 2022NBT-52652 2022NBT-52661 Dairy_cattle_Rumen-3__c593561 Roe_deer_Jejunum-1__c518 Roe_deer_Rumen-5__c3816 Sheep_Omasum-1__c231566 Water_buffalos_Rectum-3__c491225 Yak_Omasum-5__c909921 Yak_Rumen-5__c519114 contig_120477 flye-dairy_64868 flye-dairy_65511 flye-dairy_66409 flye-dairy_68501 flye-dairy_71525 flye-dairy_80442 flye-dairy_80856 s13334.dairy-hif…
VC1085	5	259.4	2594	10400	0.2001	0.996692	flye-dairy_51360 flye-dairy_51361 flye-dairy_62958 s47304.dairy-hifiasm047309l s64456.dairy-hifiasm064464c
VC1086	5	127.9	1279	8149	0.1355	0.996692	flye-dairy_81207 s29627.dairy-hifiasm029630l s40313.dairy-hifiasm040318l s46323.dairy-hifiasm046328l s47844.dairy-hifiasm047849l
VC1087	28	30.81	11700	19100	0.3777	0.00976846	2022NBT-62308 2022NBT-67826 2022NBT-70474 Dairy_cattle_Omasum-6__c861263 Dairy_cattle_Rectum-3__c896638 Goat_Cecum-2__c769549 Goat_Rumen-1__c26873 Sheep_Omasum-4__c125443 Water_deer_Rectum-4__c99339 flye-dairy_38712 flye-dairy_46939 flye-dairy_71283 s55195.dairy-hifiasm055200l contig_120892 Dairy_cattle_Duodenum-3__c578886 Roe_deer_Colon-5__c162871_1 Water_deer_Reticulum-5__c172252 Yak_Duodenum-3…
VC1088	8	55.46	1553	2559	0.3761	0.0517809	2022NBT-62465 2022NBT-66507 Roe_deer_Cecum-4__c2746 Water_deer_Colon-4__c52775 flye-dairy_75022 Goat_Cecum-2__c225775_1 Roe_deer_Rumen-5__c269428 Sheep_Ileum-5__c192268
VC1089	4	53.8	322.8	3665	0.08078	0.992931	2022NBT-70474 Goat_Omasum-2__c433834 2022NBT-68240 Water_deer_Reticulum-5__c172252
VC1090	21	40.93	8595	12400	0.4085	0.00684564	Dairy_cattle_Omasum-6__c861263 Dairy_cattle_Rectum-3__c896638 Goat_Rumen-1__c26873 flye-dairy_38712 flye-dairy_46939 flye-dairy_71283 s55195.dairy-hifiasm055200l contig_120892 Dairy_cattle_Duodenum-3__c578886 Roe_deer_Colon-5__c162871_1 Yak_Duodenum-3__c354318 flye-dairy_59967 s15989.dairy-hifiasm015990l s20380.dairy-hifiasm020382l s65184.dairy-hifiasm065192l contig_126713 s35314.dairy-hifiasm035…
VC1091	57	33.56	53600	83800	0.3897	2.6e-05	2022NBT-62308 2022NBT-67826 Goat_Cecum-2__c769549 Goat_Cecum-5__c22253_1 Roe_deer_Cecum-1__c436265 Roe_deer_Cecum-3__c1846 Roe_deer_Omasum-2__c1425_1 Roe_deer_Rectum-1__c525296 Roe_deer_Rumen-2__c2916 Sheep_Colon-5__c294928 Sheep_Omasum-4__c125443 Sheep_Rectum-5__c514_1 Water_buffalos_Cecum-3__c110087 Water_deer_Colon-4__c286 Water_deer_Rectum-4__c99339 Yak_Cecum-3__c67723 Yak_Duodenum-3__c272443…
VC1092	22	55	12700	8205	0.6063	1.09e-08	Sheep_Abomasum-4__c87518 s32180.goat-hifiasm032525l flye-goat_10365 Roe_deer_Colon-4__c3064_1 Sheep_Rumen-4__c1453813_1 Sheep_Abomasum-2__c126668 Roe_deer_Abomasum-1__c277207 Roe_deer_Cecum-1__c750901_1 Roe_deer_Reticulum-5__c417 Sheep_Abomasum-1__c138662 Sheep_Colon-4__c349978_1 Sheep_Rumen-4__c1532250 Sheep_Rumen-5__c1093 s25768.goat-hifiasm026067l s57825.dairy-hifiasm057831l s70872.dairy-hifia…
VC1093	2	51.82	51.82	1338	0.03718	0.979387	Sheep_Ileum-4__c205996 Roe_deer_Rectum-4__c1057
VC1094	24	130.2	36000	25300	0.5869	2.84e-09	Water_buffalos_Cecum-5__c159 Water_buffalos_Omasum-3__c180061 flye-dairy_49344 flye-dairy_61312 s25542.dairy-hifiasm025544l flye-dairy_74991 Yak_Rumen-2__c1283664 Yak_Rumen-4__c1967298 Yak_Rumen-5__c1323144 flye-dairy_62782 flye-dairy_65881 Dairy_cattle_Duodenum-1__c372700 Sheep_Reticulum-1__c346135 Water_buffalos_Rectum-1__c445360 Water_buffalos_Rumen-3__c1640696 Water_buffalos_Rumen-5__c2621173…
VC1095	34	27.46	15400	30000	0.3391	0.0470409	2022NBT-62308 2022NBT-67826 2022NBT-70474 Dairy_cattle_Omasum-6__c861263 Dairy_cattle_Rectum-3__c896638 Goat_Cecum-2__c769549 Goat_Rumen-1__c26873 Sheep_Omasum-4__c125443 Water_buffalos_Cecum-3__c110087 Water_deer_Rectum-4__c99339 flye-dairy_38712 flye-dairy_46939 flye-dairy_71283 flye-dairy_73816 flye-dairy_81150 s55195.dairy-hifiasm055200l s87678.dairy-hifiasm087693l contig_120892 flye-dairy_76…
VC1096	2	176.7	176.7	2669	0.06201	0.979387	flye-dairy_33826 s792.dairy-hifiasm000793l
VC1097	2	346.3	346.3	2312	0.1301	0.979387	flye-dairy_38712 Dairy_cattle_Duodenum-3__c578886
VC1098	8	82.08	2298	3131	0.4221	0.0260148	flye-dairy_71405 Roe_deer_Rumen-5__c3336 Roe_deer_Rumen-3__c132998 Sheep_Rumen-5__c3596 Goat_Duodenum-3__c15345 Sheep_Abomasum-1__c224455 Water_deer_Rectum-4__c129762_1 flye-goat_18263_1
VC1099	5	88.33	883.3	1402	0.3849	0.338052	flye-goat_21481 Roe_deer_Omasum-2__c926 Roe_deer_Rectum-2__c399011_1 Roe_deer_Rumen-2__c91298 Water_deer_Rumen-5__c4585
VC1100	42	82.7	71200	242000	0.2276	1	Water_deer_Colon-4__c64933 Roe_deer_Cecum-5__c297423 Clostridium~phage~phiCTP1 Goat_Duodenum-1__c167057 Yak_Rumen-1__c243479 Goat_Jejunum-4__c157155 Roe_deer_Colon-4__c363166 Sheep_Rumen-5__c5421 Water_deer_Cecum-1__c286094 2022NBT-22709 Dairy_cattle_Duodenum-3__c112150 Dairy_cattle_Duodenum-3__c271 Dairy_cattle_Duodenum-3__c592448 Dairy_cattle_Jejunum-2__c1925259 Goat_Abomasum-6__c303382 Goat_Ce…
VC1101	2	61.06	61.06	762.5	0.07378	0.979387	Roe_deer_Rectum-5__c813 2022NBT-63777
VC1102	2	600	600	1335	0.3095	0.658454	Sheep_Cecum-5__c369141 Water_deer_Cecum-1__c160656
VC1103	2	8.061	8.061	59.43	0.1128	0.658454	Sheep_Omasum-1__c909142 Water_deer_Colon-2__c51842
VC1104	2	325.5	325.5	624.5	0.3412	0.658454	s12671.goat-hifiasm012863l flye-goat_6629
VC1105	2	219.1	219.1	356.7	0.3779	0.658454	flye-goat_2047 s327.goat-hifiasm000336l_1
VC1106	40	58.22	45400	2232	0.9516	0	2022NBT-106276 2022NBT-106159 Dairy_cattle_Duodenum-3__c352679 Dairy_cattle_Duodenum-3__c418346 Dairy_cattle_Duodenum-3__c643313 Dairy_cattle_Duodenum-3__c786019 Dairy_cattle_Jejunum-2__c669 Goat_Duodenum-3__c204789 Roe_deer_Ileum-4__c114 Roe_deer_Jejunum-1__c595 Roe_deer_Jejunum-1__c682 Sheep_Cecum-1__c661078 Sheep_Duodenum-2__c83111 Sheep_Ileum-1__c150099 Sheep_Ileum-1__c94568 Sheep_Ileum-2__c1…
VC1107	2	121.9	121.9	1370	0.08146	0.979387	Goat_Cecum-2__c7635 Goat_Cecum-3__c243464
VC1108	4	530	3180	5421	0.3694	0.156161	2022NBT-13564 Goat_Cecum-3__c387734 Roe_deer_Colon-1__c339831 Water_deer_Cecum-3__c485451
VC1109	63	182.7	357000	138000	0.7214	0	2022NBT-10641 2022NBT-13931 2022NBT-14906 Roe_deer_Omasum-2__c1856 Roe_deer_Rumen-2__c58777 Sheep_Omasum-2__c824659 Sheep_Rectum-1__c97962 Sheep_Rumen-1__c1266686 Water_buffalos_Cecum-1__c380112 Water_buffalos_Cecum-5__c640599 Water_buffalos_Rectum-1__c313735 Water_deer_Abomasum-5__c5224 Water_deer_Cecum-3__c503539 Water_deer_Rectum-1__c382813 Water_deer_Rectum-1__c62313_1 Water_deer_Rectum-3__c4…
VC1110	19	318.4	54500	74500	0.4221	0.000317992	Dairy_cattle_Colon-2__c235715 Dairy_cattle_Rectum-2__c381394 Roe_deer_Cecum-5__c1226 Water_buffalos_Rectum-2__c658394 Yak_Abomasum-5__c140287 Yak_Cecum-4__c333554 Yak_Omasum-4__c506923 Yak_Rectum-5__c815351 Yak_Rumen-5__c432063 flye-dairy_68612 flye-dairy_72657 flye-dairy_74310 flye-dairy_76995 flye-dairy_80265 flye-dairy_80748 flye-dairy_81086 flye-dairy_81203 flye-goat_16062 Yak_Rumen-3__c24905…
VC1111	72	249.6	638000	289000	0.6878	0	2022NBT-3464 2022NBT-4081 2022NBT-4641 Roe_deer_Colon-5__c1323 Roe_deer_Jejunum-1__c353 Sheep_Rumen-3__c1180730 Water_buffalos_Reticulum-1__c37423 Yak_Omasum-1__c16268 Yak_Rectum-1__c362151 Yak_Rectum-5__c625899 Yak_Rumen-4__c1656926 flye-dairy_47526 flye-dairy_4_1 s687.goat-hifiasm000714c 2022NBT-4643 Yak_Rectum-3__c55591 flye-dairy_62463 s1378.dairy-hifiasm001379l Goat_Omasum-4__c1 Roe_deer_Oma…
VC1112	32	418.9	208000	58800	0.7792	0	2022NBT-3866 2022NBT-4389 2022NBT-5222 Yak_Cecum-2__c891096 flye-dairy_36864 flye-dairy_73342 Roe_deer_Rumen-1__c12112 Sheep_Rumen-5__c952947 flye-dairy_48910 Goat_Rumen-2__c663493 Water_buffalos_Rumen-3__c765019 Water_deer_Ileum-2__c19123 contig_157516 flye-dairy_53997 flye-dairy_56872 flye-dairy_59315 flye-dairy_77774 flye-dairy_78657 s1706.dairy-hifiasm001707c s2537.goat-hifiasm002614l s3465.d…
VC1113	38	156.2	110000	74100	0.5968	0	Dairy_cattle_Rectum-5__c88 Goat_Rectum-3__c647643 Roe_deer_Cecum-1__c391869 Yak_Cecum-3__c169556 2022NBT-27741 Dairy_cattle_Colon-4__c355 Dairy_cattle_Rectum-4__c625799 Roe_deer_Rectum-4__c716 Water_buffalos_Cecum-2__c1066895 Water_buffalos_Cecum-2__c220355 Yak_Cecum-1__c313579 Yak_Cecum-1__c513393 Yak_Cecum-1__c611660 Yak_Colon-3__c361913 Yak_Rectum-1__c631008 Yak_Rectum-5__c116433 Yak_Rectum-5_…
VC1114	16	275.9	33100	90200	0.2685	0.978119	Roe_deer_Rumen-2__c58777 Sheep_Omasum-2__c824659 Water_deer_Abomasum-5__c5224 Yak_Rumen-1__c3 contig_53630 contig_68731 contig_69864 contig_95634 flye-dairy_15182 flye-dairy_36630 flye-dairy_37720 flye-dairy_55072 flye-dairy_57704 s19278.dairy-hifiasm019280l s33382.dairy-hifiasm033386l s6444.dairy-hifiasm006445l
VC1115	24	246.5	68000	91600	0.4261	0.000321788	Dairy_cattle_Colon-2__c235715 Dairy_cattle_Rectum-2__c381394 Roe_deer_Cecum-5__c1226 Water_buffalos_Cecum-4__c498015 Water_buffalos_Rectum-2__c658394 Yak_Abomasum-5__c140287 Yak_Cecum-1__c478653 Yak_Cecum-4__c333554 Yak_Cecum-4__c6 Yak_Omasum-4__c506923 Yak_Rectum-3__c524359 Yak_Rectum-5__c815351 Yak_Rumen-5__c432063 flye-dairy_61193 flye-dairy_68612 flye-dairy_72657 flye-dairy_74310 flye-dairy_7…
VC1116	168	89.14	1250000	437000	0.7409	0	Water_buffalos_Colon-4__c42819 Yak_Duodenum-1__c330744 Yak_Rectum-3__c424779 Yak_Rectum-4__c559565 flye-dairy_34587 2022NBT-23022 2022NBT-21780 2022NBT-22300 2022NBT-22581 2022NBT-23092 2022NBT-23522 Bacteroides~phage~crAss001 Dairy_cattle_Cecum-2__c283600 Goat_Rumen-2__c547215 Roe_deer_Rectum-4__c44024 Sheep_Rectum-1__c874335 Sheep_Rumen-5__c999246 Water_buffalos_Cecum-5__c389363 Water_buffalos_…
VC1117	4	339.3	2036	28100	0.0676	0.992931	contig_91346 flye-dairy_35477 flye-dairy_46197 flye-dairy_66638
VC1118	4	408.5	2451	15500	0.1361	0.943824	Water_buffalos_Rumen-5__c1246443 contig_63082 flye-dairy_64487 s15969.dairy-hifiasm015970l
VC1119	7	269.1	5652	3661	0.6059	0.00108251	flye-dairy_42469 flye-dairy_42471 s8193.dairy-hifiasm008194l s24044.dairy-hifiasm024046l flye-dairy_41505 flye-dairy_42470 s11170.dairy-hifiasm011171l
VC1120	2	222.4	222.4	1393	0.1374	0.979387	s375.dairy-hifiasm000376l contig_165334
VC1121	41	82.09	67300	21800	0.7551	0	Goat_Rumen-4__c217 Sheep_Rumen-5__c877421 Yak_Duodenum-1__c362936 flye-dairy_58640 flye-dairy_80374 s95090.dairy-hifiasm095106l 2022NBT-69752 Yak_Jejunum-5__c76253 flye-dairy_69470 s88902.dairy-hifiasm088917l Yak_Rumen-2__c1001372_1 Dairy_cattle_Rumen-3__c473813 Yak_Duodenum-3__c46296 flye-dairy_63310 flye-dairy_70665 s13633.dairy-hifiasm013634l s20748.dairy-hifiasm020750l s22652.dairy-hifiasm022…
VC1122	15	62.58	6570	10600	0.3821	0.00448601	s46281.dairy-hifiasm046286l s88926.dairy-hifiasm088941l Water_buffalos_Rumen-3__c1518662 Sheep_Reticulum-4__c678569 s61840.dairy-hifiasm061846l Yak_Cecum-2__c992991 Water_deer_Reticulum-2__c48288 s14628.dairy-hifiasm014629l Goat_Reticulum-4__c90273 Goat_Omasum-4__c198990 Goat_Rumen-6__c34549 Sheep_Rumen-5__c1631886 Water_deer_Omasum-2__c89407 Yak_Cecum-4__c397891 s27202.dairy-hifiasm027204l
VC1123	10	62.33	2805	10800	0.2062	0.989433	Sheep_Rumen-4__c1014775 Goat_Rumen-5__c339489 flye-dairy_64356 Sheep_Colon-3__c55965 Yak_Rumen-5__c174618 flye-dairy_64357 s9160.dairy-hifiasm009161l Goat_Abomasum-5__c821469 Goat_Jejunum-5__c22 flye-dairy_56571
VC1124	18	95.81	14700	26000	0.3599	0.151915	Sheep_Ileum-1__c193272 flye-dairy_62222 Dairy_cattle_Duodenum-1__c54910 Dairy_cattle_Duodenum-1__c594547 Sheep_Duodenum-4__c172273 Sheep_Duodenum-5__c162912 Sheep_Ileum-4__c1476 Sheep_Jejunum-5__c185 Sheep_Rumen-5__c817592 Water_buffalos_Rumen-3__c634112 Yak_Jejunum-5__c1 flye-dairy_50590 flye-dairy_62221 flye-dairy_68922 flye-dairy_70108 s66569.dairy-hifiasm066578l s73745.dairy-hifiasm073756l Sh…
VC1125	31	135.7	63100	31200	0.6688	0	Roe_deer_Reticulum-5__c266779 Sheep_Rumen-4__c4330 Roe_deer_Cecum-5__c103861_1 Roe_deer_Omasum-5__c573 Roe_deer_Rectum-1__c1862_1 s6513.goat-hifiasm006645l_1 2022NBT-51240 2022NBT-55356 Goat_Cecum-6__c181601_1 Water_buffalos_Rectum-5__c347581 Water_deer_Cecum-3__c161984_1 2022NBT-41859 Goat_Colon-1__c715927 Goat_Omasum-3__c453021 Goat_Rumen-5__c182413 Goat_Rumen-6__c786515_1 Roe_deer_Cecum-3__c46…
VC1126	7	180.5	3791	9777	0.2791	0.979543	Lactococcus~phage~TP901-1 Lactococcus~phage~Tuc2009 Lactococcus~phage~ul36 Streptococcus~virus~9871 Streptococcus~virus~9872 Streptococcus~virus~9873 Streptococcus~virus~9874
VC1127	12	42.7	2818	9552	0.2274	0.973451	Roe_deer_Jejunum-1__c187263 Dairy_cattle_Duodenum-1__c1619 Sheep_Abomasum-2__c92748 Sheep_Omasum-2__c365743 Sheep_Reticulum-2__c541990 Sheep_Rumen-3__c1533289 Water_buffalos_Rumen-2__c2106354 flye-dairy_79580 s21519.dairy-hifiasm021521l s64534.dairy-hifiasm064542l s8537.dairy-hifiasm008538l Sheep_Jejunum-2__c41596
VC1128	8	112.8	3158	967.6	0.7625	0.000469553	Enterococcus~phage~phiFL3A Brochothrix~phage~BL3 Lactobacillus~prophage~Lj965 Lactococcus~phage~PLgT-1 Oenococcus~phage~phi9805 Oenococcus~phage~phiS11 Oenococcus~phage~phiS13 Sheep_Abomasum-2__c371908
VC1129	3	90.62	271.9	660.5	0.2897	0.66874	Listeria~phage~P35 Listeria~phage~P40 Lactococcus~phage~1358
VC1130	3	177.9	533.6	8176	0.06122	0.985452	Sheep_Reticulum-4__c114992 Sheep_Duodenum-3__c414919 Sheep_Rumen-2__c465648
VC1131	3	176	528.1	2624	0.1672	0.985452	Sheep_Rumen-3__c1533289 Water_buffalos_Rumen-2__c2106354 s64534.dairy-hifiasm064542l
VC1132	11	217.1	11900	5155	0.6975	4.08e-05	Streptococcus~phage~DCC1738 Streptococcus~phage~IC1 Streptococcus~phage~K13 Streptococcus~phage~phiARI0004 Streptococcus~phage~phiARI0031 Streptococcus~phage~phiARI0131-1 Streptococcus~phage~phiARI0460-1 Streptococcus~phage~phiARI0462 Streptococcus~phage~phiARI0468-1 Streptococcus~phage~phiARI0468-2 Streptococcus~phage~phiARI0746
VC1133	2	238.3	238.3	4636	0.04885	0.979387	flye-dairy_11541 s12102.dairy-hifiasm012103c
VC1134	10	140	6299	21100	0.2297	0.999147	Roe_deer_Rumen-5__c3279 flye-dairy_65455 Sheep_Rumen-1__c354382 flye-dairy_29957 s43679.dairy-hifiasm043684c s6913.dairy-hifiasm006914l Goat_Jejunum-4__c253649 Sheep_Abomasum-4__c639705 contig_109153 flye-dairy_6602
VC1135	2	169.1	169.1	329.9	0.3362	0.658454	flye-dairy_65685 s26360.dairy-hifiasm026362l
VC1136	4	40.22	241.3	815	0.2268	0.969699	2022NBT-120573 Roe_deer_Cecum-2__c225472 Roe_deer_Omasum-2__c90444 2022NBT-114508
VC1137	2	144.4	144.4	1328	0.09783	0.979387	2022NBT-27656 2022NBT-52196
VC1138	2	57.6	57.6	373.2	0.1325	0.979387	Roe_deer_Cecum-2__c482416 Water_deer_Colon-2__c29792
VC1139	2	50.12	50.12	589	0.07793	0.979387	Roe_deer_Cecum-3__c103345 2022NBT-70677
VC1140	4	135.6	813.7	874.1	0.4798	0.0151914	2022NBT-51257 Goat_Rectum-1__c282159 Goat_Rectum-5__c496058 Goat_Rectum-6__c163469
VC1141	3	144.9	434.7	436.3	0.4956	0.0404278	2022NBT-60250 2022NBT-69002 Roe_deer_Cecum-1__c238593
VC1142	2	55.59	55.59	379.7	0.1266	0.979387	2022NBT-67359 Roe_deer_Rectum-2__c117
VC1143	3	103.5	310.5	815.7	0.2742	0.5	2022NBT-93790 Water_buffalos_Rectum-5__c279360 Yak_Colon-3__c182221
VC1144	5	176.1	1761	2644	0.3989	0.0107859	Dairy_cattle_Rumen-2__c457_1 flye-dairy_38879 flye-dairy_63469 flye-dairy_80888 s39266.dairy-hifiasm039271c
VC1145	2	162.1	162.1	1285	0.1118	0.979387	2022NBT-27803 Goat_Cecum-1__c130922
VC1146	2	600	600	1872	0.2423	0.979387	2022NBT-5927 2022NBT-7862
VC1147	48	141.1	159000	44600	0.7808	0	flye-goat_12646_1 Goat_Colon-1__c421591_1 Roe_deer_Cecum-2__c648390 Roe_deer_Rectum-3__c167 Roe_deer_Rectum-3__c55072 Goat_Rumen-2__c730915 Goat_Rumen-2__c80421 Sheep_Rumen-4__c446110 Goat_Colon-2__c387790 Roe_deer_Rumen-2__c5825_1 Sheep_Abomasum-2__c510825 2022NBT-1652_1 2022NBT-43481 Goat_Colon-6__c790132_1 Goat_Jejunum-2__c243603 Goat_Omasum-2__c258758_1 Goat_Omasum-2__c481628_1 Goat_Omasum-5_…
VC1148	28	92.71	35000	28700	0.5495	0	Yak_Abomasum-2__c626336 Yak_Duodenum-1__c272918 Yak_Duodenum-3__c154 Yak_Omasum-5__c344586 flye-dairy_58818 flye-dairy_70969 flye-dairy_81125 s19066.dairy-hifiasm019068l Dairy_cattle_Duodenum-2__c291037 Dairy_cattle_Duodenum-3__c31158 Dairy_cattle_Duodenum-3__c346908 Dairy_cattle_Duodenum-3__c835154 Dairy_cattle_Rumen-2__c1625352 Water_buffalos_Omasum-1__c316282 Water_buffalos_Reticulum-3__c26462…
VC1149	13	61	4758	11400	0.2941	0.84747	flye-goat_9111 Sheep_Rumen-1__c1270489 flye-goat_5604 flye-goat_772 s15471.goat-hifiasm015685l s4930.goat-hifiasm005045l s5493.goat-hifiasm005613l Goat_Reticulum-2__c477585 flye-goat_12704 s25811.goat-hifiasm026110l s4715.goat-hifiasm004826l Sheep_Rumen-1__c913862 Goat_Reticulum-2__c365495
VC1150	2	303	303	1811	0.1431	0.979387	2022NBT-41287 2022NBT-60191
VC1151	9	247.5	8910	59000	0.1312	0.999853	Goat_Colon-4__c328 Water_buffalos_Cecum-5__c300079 2022NBT-24073 2022NBT-29852 2022NBT-32806 Roe_deer_Rectum-1__c1482 Sheep_Colon-2__c415598 Sheep_Rectum-3__c1452 Water_deer_Cecum-3__c303599
VC1152	3	144.5	433.6	3760	0.1032	0.985452	Goat_Colon-3__c88177 Water_buffalos_Cecum-4__c588495 2022NBT-47908
VC1153	9	179.3	6456	78400	0.07609	0.999853	Water_deer_Reticulum-2__c26 Water_deer_Rumen-3__c151 flye-dairy_22440 flye-dairy_52428 flye-goat_197 s1758.goat-hifiasm001822l s798.dairy-hifiasm000799l Water_buffalos_Rumen-3__c1946298 Roe_deer_Duodenum-1__c389
VC1154	3	215.5	646.5	15200	0.04093	0.985452	Goat_Colon-4__c332729 Roe_deer_Cecum-1__c276141 Goat_Rectum-1__c184247
VC1155	5	2.184	21.84	209.4	0.09055	0.989214	Roe_deer_Cecum-5__c2519 Goat_Rumen-5__c1015035 flye-goat_11402 contig_5758 Roe_deer_Reticulum-4__c2092
VC1156	36	79.45	50100	40400	0.5532	0	Roe_deer_Cecum-2__c59 Roe_deer_Reticulum-4__c401 Water_deer_Abomasum-3__c35893 Roe_deer_Cecum-3__c259259 Goat_Rectum-3__c294743 Roe_deer_Rectum-3__c196 2022NBT-21595_1 Dairy_cattle_Cecum-2__c732413_1 Water_buffalos_Cecum-4__c255345_1 Water_buffalos_Rumen-4__c616652 Yak_Cecum-5__c456641 Yak_Rectum-4__c26486_1 Yak_Rectum-5__c513137 2022NBT-419_1 2022NBT-71224 Goat_Abomasum-2__c922_1 Goat_Colon-6__c…
VC1157	15	188.3	19800	9961	0.6643	1.7e-06	2022NBT-67557 2022NBT-35085 2022NBT-24986_1 2022NBT-24858_1 2022NBT-34752 2022NBT-53101 2022NBT-72462 2022NBT-79253 Dairy_cattle_Cecum-6__c23 Goat_Abomasum-6__c142173_1 Roe_deer_Colon-1__c618_1 Roe_deer_Colon-4__c3110 Roe_deer_Rectum-3__c1080 Water_buffalos_Cecum-1__c125326 Water_buffalos_Rectum-5__c267571
VC1158	15	80.03	8403	26700	0.2395	0.309335	Roe_deer_Rumen-2__c1628 flye-dairy_4464 Goat_Abomasum-5__c351007 Goat_Reticulum-5__c315 Goat_Rumen-4__c583 Roe_deer_Omasum-1__c1811 Roe_deer_Rumen-2__c156028 Roe_deer_Rumen-5__c3303 s11865.dairy-hifiasm011866l s5356.dairy-hifiasm005357l Sheep_Reticulum-4__c815716 Water_deer_Omasum-3__c252297 Water_deer_Rumen-2__c408820_1 s41287.dairy-hifiasm041292l s9490.dairy-hifiasm009491l
VC1159	11	53.66	2951	8379	0.26	0.162113	flye-goat_16881 s4686.goat-hifiasm004796l 2022NBT-39037_1 2022NBT-51214 Rhodobacter~phage~RC1 Rhodovulum~phage~RS1 Rhodovulum~phage~vB_RhkS_P1 Sheep_Abomasum-1__c347880_1 Sheep_Duodenum-2__c85179 Sheep_Ileum-3__c179650 Sheep_Jejunum-3__c54066_1
VC1160	15	68.59	7202	17300	0.2933	0.840247	Roe_deer_Rumen-3__c1838 s98646.dairy-hifiasm098664l s87721.dairy-hifiasm087736l Roe_deer_Abomasum-5__c1572 Roe_deer_Abomasum-5__c1701 s27728.goat-hifiasm028042l s45704.dairy-hifiasm045709l s78859.dairy-hifiasm078872l Goat_Omasum-2__c394096 s73917.dairy-hifiasm073928l s99548.dairy-hifiasm099566l s40703.goat-hifiasm041120l flye-dairy_38018 Roe_deer_Rumen-1__c387298_1 s19104.dairy-hifiasm019106l
VC1161	5	257	2570	9090	0.2202	0.928164	Water_deer_Rumen-2__c170 Water_deer_Abomasum-5__c81 Sheep_Omasum-5__c591080 Goat_Omasum-2__c312465 s45246.dairy-hifiasm045251l
VC1162	3	215.7	647	2017	0.2423	0.985452	Goat_Rumen-6__c203589_1 flye-dairy_60918 s83877.dairy-hifiasm083891l
VC1163	4	66.04	396.2	898.3	0.3042	0.156161	s89026.dairy-hifiasm089041l s67284.dairy-hifiasm067293l s60089.dairy-hifiasm060095l Water_buffalos_Rumen-3__c1510453
VC1164	7	39.26	824.5	7266	0.1017	0.998917	Goat_Colon-5__c5_1 Roe_deer_Reticulum-1__c73729 Roe_deer_Rumen-1__c219055 contig_33220 flye-dairy_74901 s35072.dairy-hifiasm035076l s54731.dairy-hifiasm054736l
VC1165	80	83.18	263000	84100	0.7574	0	Goat_Colon-1__c477158 Goat_Rumen-4__c546750_1 2022NBT-3985_1 2022NBT-41880 2022NBT-62241 2022NBT-779_1 Goat_Cecum-6__c338 Roe_deer_Cecum-4__c660_1 Roe_deer_Rectum-1__c1509 Sheep_Colon-4__c236 Sheep_Colon-5__c582054 Sheep_Rectum-1__c1299 Water_buffalos_Colon-3__c25618_1 Water_buffalos_Rectum-2__c380837 Water_buffalos_Rumen-1__c989460 Water_deer_Colon-4__c293684 flye-goat_10431 Goat_Abomasum-3__c87…
VC1166	2	225.9	225.9	602.6	0.2713	0.979387	Yak_Omasum-3__c33832 flye-dairy_28181
VC1167	2	403.4	403.4	4289	0.08589	0.979387	Goat_Rumen-4__c1353 Goat_Rumen-1__c2727
VC1168	4	107.2	643.1	7559	0.07833	0.992931	Goat_Rumen-6__c2048 Goat_Rumen-2__c1569 Roe_deer_Rumen-2__c1006 Water_deer_Reticulum-2__c37830
VC1169	77	71.81	210000	135000	0.6095	0	Goat_Rumen-6__c346020 Goat_Omasum-2__c282122 Sheep_Rumen-1__c231810 2022NBT-1904_1 2022NBT-39695 2022NBT-72630 Dairy_cattle_Colon-2__c403044 Goat_Cecum-2__c675186 Goat_Cecum-5__c174 Goat_Colon-4__c151781_1 Goat_Reticulum-5__c372620_1 Goat_Rumen-2__c685079 Roe_deer_Cecum-2__c49_1 Roe_deer_Colon-3__c2432_1 Roe_deer_Duodenum-2__c1658 Roe_deer_Reticulum-2__c1470 Roe_deer_Reticulum-4__c112352_1 Roe_de…
VC1170	5	110.7	1107	17100	0.06093	0.996692	Goat_Rumen-6__c937 flye-dairy_65728 Sheep_Omasum-4__c1048074 Water_buffalos_Reticulum-3__c835772 Sheep_Rumen-2__c599
VC1171	41	77.02	63200	59400	0.5151	0	Water_deer_Rectum-4__c1416 flye-dairy_45953 flye-dairy_63287 Goat_Reticulum-2__c507811 Roe_deer_Abomasum-1__c84035 Roe_deer_Reticulum-4__c1855_1 Sheep_Rectum-2__c450315_1 Sheep_Rumen-3__c687191 Water_buffalos_Rumen-3__c643020 Water_deer_Omasum-2__c360 Water_deer_Omasum-5__c168427_1 Water_deer_Rumen-5__c279728 Yak_Rumen-4__c93451 contig_121468 contig_190822 contig_28526 flye-dairy_38726 flye-dairy…
VC1172	5	491.6	4916	8434	0.3679	0.148135	Goat_Rumen-5__c733335_1 Goat_Rumen-6__c757077_1 Roe_deer_Reticulum-2__c168_1 Roe_deer_Rumen-5__c3226_1 Water_buffalos_Rumen-3__c566831
VC1173	17	209.3	28500	2219	0.9267	3.52e-07	Goat_Abomasum-4__c233788 Goat_Abomasum-3__c21967 Goat_Omasum-5__c57624 Sheep_Abomasum-2__c127_1 Sheep_Colon-3__c738881_1 Sheep_Colon-5__c758144_1 Sheep_Reticulum-2__c216783_1 Water_buffalos_Omasum-1__c99909 Water_buffalos_Omasum-3__c454271_1 Water_buffalos_Omasum-4__c1328581 Water_buffalos_Rumen-1__c1256991_1 Yak_Reticulum-4__c698708_1 Yak_Rumen-1__c1836215 Yak_Rumen-2__c191299_1 contig_186853 s1…
VC1174	20	181.1	34400	106000	0.2447	0.99926	Roe_deer_Duodenum-1__c505 Water_buffalos_Rumen-1__c599067 flye-dairy_33590 flye-goat_1647 s2872.goat-hifiasm002960l s3335.goat-hifiasm003430c 2022NBT-11157 Goat_Abomasum-1__c428044 Goat_Reticulum-2__c64318 Goat_Rumen-1__c823431 Roe_deer_Omasum-3__c284 Roe_deer_Omasum-5__c2263 Roe_deer_Rumen-4__c151247 Sheep_Omasum-2__c816 Water_deer_Omasum-1__c149 Yak_Rumen-2__c838762 flye-dairy_2403 flye-dairy_4…
VC1175	11	183.4	10100	28600	0.261	0.993707	Roe_deer_Omasum-1__c1704 Sheep_Omasum-2__c533950 Sheep_Reticulum-4__c55 Water_deer_Rumen-1__c197971 Yak_Omasum-1__c942987 Roe_deer_Rumen-4__c2818 Goat_Abomasum-5__c271 Roe_deer_Duodenum-1__c210 flye-dairy_1753 flye-dairy_2511 flye-dairy_2581
VC1176	14	96.18	8752	12600	0.4091	0.00312958	s1734.dairy-hifiasm001735l Water_deer_Rumen-2__c256476 s11312.dairy-hifiasm011313l s27728.dairy-hifiasm027730l s44361.dairy-hifiasm044366l flye-dairy_16990 s25598.dairy-hifiasm025600l Sheep_Rumen-4__c114357 s50116.dairy-hifiasm050121l Roe_deer_Duodenum-2__c55_1 Water_deer_Rumen-5__c433 Goat_Rumen-2__c2302 flye-dairy_2611 s42975.dairy-hifiasm042980l
VC1177	34	164.8	92500	26900	0.7742	0	Water_deer_Colon-4__c234_1 Sheep_Rectum-1__c536 2022NBT-72871 Dairy_cattle_Rectum-3__c95698 Goat_Rectum-5__c502481 Roe_deer_Cecum-2__c821_1 Roe_deer_Cecum-4__c226_1 Water_buffalos_Rectum-3__c415514_1 Water_deer_Abomasum-5__c19998 Water_deer_Cecum-1__c208183_1 Yak_Rectum-3__c375777 Goat_Rumen-3__c716515 Roe_deer_Rectum-2__c674154 Sheep_Colon-5__c226338 Goat_Omasum-2__c484950_1 Goat_Reticulum-2__c1…
VC1178	2	91.19	91.19	1010	0.08254	0.979387	Sheep_Rumen-4__c1314278 Yak_Rumen-5__c2050690
VC1179	35	156.9	93400	34700	0.7289	0	Water_deer_Cecum-2__c480585_1 Roe_deer_Cecum-5__c2150_1 Sheep_Rectum-2__c491241 Sheep_Rectum-2__c786800 Water_deer_Omasum-3__c2680 2022NBT-70974 Dairy_cattle_Cecum-2__c977398 Goat_Abomasum-3__c220645 Goat_Abomasum-3__c253903 Goat_Cecum-3__c30101 Goat_Cecum-6__c87 Goat_Rumen-1__c957118 Goat_Rumen-3__c19249 Goat_Rumen-6__c102272_1 Roe_deer_Abomasum-5__c2284_1 Roe_deer_Colon-4__c2342 Roe_deer_Duoden…
VC1180	3	156.6	469.7	9682	0.04624	0.985452	Sheep_Rumen-3__c1191278 Water_deer_Omasum-1__c107778 contig_127557
VC1181	26	108.6	35300	19000	0.6491	0	Goat_Rumen-6__c258785 Roe_deer_Reticulum-2__c72130 Water_deer_Reticulum-4__c122612 Roe_deer_Rectum-1__c1052 Goat_Reticulum-5__c55552 Goat_Rumen-3__c1011 Roe_deer_Omasum-3__c93125 Roe_deer_Rectum-5__c3371 Roe_deer_Reticulum-4__c1485 Roe_deer_Rumen-5__c2963 Sheep_Omasum-1__c154818 Sheep_Rumen-2__c750779 Water_buffalos_Cecum-3__c884364 Water_buffalos_Rectum-1__c370885 Water_buffalos_Rumen-1__c114031…
VC1182	2	48.18	48.18	2778	0.01703	0.979387	Sheep_Rumen-4__c3436 Goat_Reticulum-3__c1063
VC1183	20	112.3	21300	5038	0.8078	3.39e-08	Yak_Rectum-1__c486971 Goat_Duodenum-3__c233784 Goat_Reticulum-6__c604_1 Dairy_cattle_Colon-2__c42 Sheep_Abomasum-1__c206085 Sheep_Rumen-2__c936498 Water_buffalos_Rectum-4__c178494 Water_buffalos_Rumen-4__c1641358 Yak_Cecum-3__c721983 Yak_Colon-3__c485537 Yak_Rectum-1__c299770 flye-dairy_68685 flye-dairy_80250 s13384.dairy-hifiasm013385l s20461.dairy-hifiasm020463l s39097.dairy-hifiasm039102l s518…
VC1184	4	79.02	474.1	10500	0.04307	0.992931	s6825.dairy-hifiasm006826l flye-dairy_75217 Yak_Cecum-5__c309125 s23862.dairy-hifiasm023864l
VC1185	2	150.2	150.2	7820	0.01883	0.979387	Water_buffalos_Omasum-1__c544411 Water_buffalos_Rumen-4__c93
VC1186	18	148	22600	22500	0.5012	2.25e-07	Roe_deer_Rumen-2__c5569 Goat_Abomasum-6__c663798 Water_buffalos_Reticulum-3__c519808 Water_buffalos_Rumen-3__c1582949_1 contig_2936 Goat_Reticulum-5__c355473 Goat_Rumen-3__c32801 Water_buffalos_Reticulum-3__c110558 Water_buffalos_Rumen-2__c1615996_1 Yak_Rumen-5__c1687744 Goat_Abomasum-3__c642335 Goat_Rumen-5__c445644 Sheep_Rumen-2__c532856 Yak_Rumen-5__c119406_1 Yak_Omasum-3__c1202544_1 Yak_Retic…
VC1187	9	212.4	7648	21700	0.2605	0.989158	Sheep_Cecum-3__c430770 Sheep_Colon-5__c497673 Yak_Duodenum-1__c266867 flye-dairy_40286 Dairy_cattle_Jejunum-6__c163509 Sheep_Ileum-1__c12893 Yak_Rumen-5__c1876552 Sheep_Ileum-4__c172854 s3011.dairy-hifiasm003012l
VC1188	14	104.8	9534	21200	0.3102	0.896806	Sheep_Rumen-1__c1169048 Water_deer_Reticulum-5__c541 Roe_deer_Reticulum-4__c401 Roe_deer_Omasum-5__c2446 Water_buffalos_Rumen-4__c616652 2022NBT-71224 Goat_Abomasum-2__c922_1 Goat_Rumen-2__c162683_1 Roe_deer_Reticulum-3__c66477 Roe_deer_Reticulum-5__c758 Roe_deer_Rumen-5__c85590 Sheep_Omasum-1__c789314_1 Sheep_Rumen-5__c143133_1 Water_buffalos_Colon-1__c512298
VC1189	8	79.63	2230	35300	0.05936	0.999679	Goat_Rumen-6__c937 contig_25478 flye-dairy_65728 Sheep_Omasum-4__c1048074 Water_buffalos_Omasum-4__c18034 Water_buffalos_Reticulum-3__c835772 Goat_Abomasum-5__c987 Sheep_Rumen-2__c599
VC1190	12	80.97	5344	38600	0.1216	0.991713	flye-dairy_33590 Roe_deer_Omasum-1__c1704 Roe_deer_Rumen-3__c221682 flye-dairy_2604 Roe_deer_Abomasum-5__c675 Water_deer_Abomasum-1__c45 Water_deer_Abomasum-2__c280 s1164.goat-hifiasm001209l s6481.goat-hifiasm006613l Water_deer_Reticulum-4__c220783 flye-goat_836 Goat_Omasum-6__c365351
VC1191	33	235	124000	83700	0.5969	0	2022NBT-25172 2022NBT-25228 2022NBT-25820 Water_buffalos_Rumen-5__c227629 Water_deer_Abomasum-5__c10359 Yak_Duodenum-3__c426916 flye-dairy_29754 flye-dairy_47838 flye-dairy_76446 2022NBT-21822 Roe_deer_Reticulum-4__c151637 Roe_deer_Rumen-2__c1557 Yak_Jejunum-5__c123913 s4516.dairy-hifiasm004517l Dairy_cattle_Jejunum-6__c70379 Dairy_cattle_Reticulum-6__c456425 s18281.dairy-hifiasm018283l s13158.da…
VC1192	2	600	600	14300	0.04018	0.979387	Yak_Rumen-4__c1117101 Goat_Omasum-5__c236425
VC1193	3	61.99	186	7127	0.02541	0.985452	Water_buffalos_Omasum-3__c267859 flye-dairy_53100 s66165.dairy-hifiasm066174l
VC1194	103	123.2	647000	95800	0.8709	0	Yak_Duodenum-3__c78505 contig_77645 flye-dairy_14504 flye-dairy_15766 flye-dairy_17743 flye-dairy_25206 flye-dairy_33907 flye-dairy_34918 flye-dairy_40307 flye-dairy_43052 flye-dairy_49548 flye-dairy_49939 flye-dairy_52176 flye-dairy_59433 flye-dairy_62255 flye-dairy_62778 flye-dairy_63653 flye-dairy_71174 s17669.dairy-hifiasm017670l s21829.dairy-hifiasm021831l s22993.dairy-hifiasm022995l s23593.…
VC1195	12	100.7	6646	67600	0.08949	0.999986	Roe_deer_Jejunum-2__c179587 Sheep_Ileum-4__c235986 Sheep_Rumen-5__c807208 Yak_Duodenum-1__c381238 Yak_Jejunum-5__c148567 flye-dairy_71134 flye-goat_21052 Water_buffalos_Abomasum-1__c44 flye-dairy_34774 s67103.dairy-hifiasm067112l Dairy_cattle_Duodenum-3__c499563 s60189.dairy-hifiasm060195l
VC1196	2	153.2	153.2	3189	0.04579	0.979387	s6181.dairy-hifiasm006182l s13238.dairy-hifiasm013239l
VC1197	2	161.8	161.8	2445	0.06196	0.979387	Sheep_Rectum-2__c598133 Water_buffalos_Cecum-5__c701481
VC1198	2	57.26	57.26	1020	0.05294	0.979387	flye-dairy_48418 Sheep_Rumen-5__c1481
VC1199	30	113.2	49200	28400	0.6337	0	flye-dairy_50894 Roe_deer_Rumen-2__c5569 Goat_Abomasum-6__c663798 Water_buffalos_Reticulum-3__c519808 Water_buffalos_Rumen-3__c1582949_1 contig_2936 Goat_Reticulum-5__c400518 Roe_deer_Rumen-5__c4187 Sheep_Omasum-2__c511136 Water_buffalos_Rumen-3__c1378449_1 Water_buffalos_Rumen-5__c2069395 Yak_Rumen-4__c2325224 Yak_Rumen-5__c1661689_1 flye-goat_10356_1 s12340.dairy-hifiasm012341l_1 s21656.goat-hi…
VC1200	4	210.1	1261	27400	0.04401	0.992931	flye-dairy_39197 flye-dairy_63627 flye-goat_4647 Sheep_Abomasum-4__c717
VC1201	11	99.45	5470	2889	0.6527	4.08e-05	Dairy_cattle_Duodenum-3__c1407 Dairy_cattle_Jejunum-1__c114 Sheep_Reticulum-2__c124139_1 Sheep_Rumen-1__c1018724 Yak_Omasum-4__c370634 flye-dairy_61586 flye-dairy_73274 flye-dairy_76854 flye-dairy_80860 s100395.dairy-hifiasm100419l Dairy_cattle_Reticulum-5__c1157271
VC1202	5	53.5	535	4184	0.1131	0.952654	Sheep_Reticulum-2__c495840 s12374.dairy-hifiasm012375l Goat_Reticulum-5__c203 Goat_Abomasum-2__c57500 Goat_Rumen-6__c551170
VC1203	56	71.38	110000	35000	0.7582	0	s13434.goat-hifiasm013636l s58034.dairy-hifiasm058040l 2022NBT-60966 Dairy_cattle_Cecum-2__c175491 Goat_Rumen-2__c2466_1 Goat_Rumen-2__c782505 Sheep_Abomasum-4__c223 Sheep_Abomasum-5__c567110 Sheep_Ileum-1__c37391 Sheep_Rectum-1__c735781 Sheep_Rectum-4__c916 Sheep_Rumen-1__c1193496_1 Sheep_Rumen-1__c7154 Sheep_Rumen-2__c785740 Sheep_Rumen-3__c887529 Water_buffalos_Omasum-4__c479522 Water_buffalos…
VC1204	9	97.49	3509	473.1	0.8772	0.000206148	Goat_Cecum-4__c302974 2022NBT-59951 Goat_Rectum-5__c456370 Goat_Reticulum-3__c546288 Roe_deer_Jejunum-1__c187258 contig_73641 flye-dairy_60060 flye-dairy_66857 flye-goat_20701
VC1205	2	25.45	25.45	381.3	0.06196	0.979387	s48177.dairy-hifiasm048182l contig_9209
VC1206	2	131.9	131.9	315	0.2925	0.979387	flye-dairy_62752 s14165.dairy-hifiasm014166l
VC1207	2	479.1	479.1	2540	0.1585	0.979387	Goat_Rumen-3__c2940 flye-goat_18501
VC1208	2	22.58	22.58	1853	0.01201	0.979387	s9259.goat-hifiasm009419l 2022NBT-73908
VC1209	18	204.9	31400	22100	0.5857	1.61e-07	2022NBT-10710_1 2022NBT-25017_1 Faecalibacterium~phage~FP_Toutatis Goat_Cecum-3__c507529 Goat_Colon-6__c796775 Goat_Rumen-5__c290361 Roe_deer_Rumen-3__c126384 Roe_deer_Rumen-5__c1239 Roe_deer_Rumen-5__c4730 Sheep_Colon-3__c509399 Sheep_Rectum-1__c224 Sheep_Rumen-1__c61334 Sheep_Rumen-2__c947698 Sheep_Rumen-4__c1477360 flye-goat_15231 s14241.goat-hifiasm014447l s24093.goat-hifiasm024377l s2818.goa…
VC1210	4	178.3	1070	5154	0.1717	0.903035	Water_buffalos_Rumen-1__c1128481_1 s33252.goat-hifiasm033605l Goat_Rumen-4__c159979 Goat_Rumen-4__c846023
VC1211	12	246.3	16300	21900	0.4261	0.00100475	Goat_Rectum-4__c453826 Goat_Rectum-6__c429578 Goat_Rumen-5__c982899 Roe_deer_Cecum-1__c491533 Roe_deer_Colon-3__c21_1 Roe_deer_Jejunum-3__c1720 Water_buffalos_Rectum-4__c155730 Water_deer_Cecum-1__c334865 Water_deer_Colon-4__c177907_1 Water_deer_Omasum-3__c100154 Water_deer_Rectum-1__c6422 Water_deer_Reticulum-2__c132598
VC1212	4	164.5	986.7	13900	0.06645	0.992931	Roe_deer_Abomasum-4__c1678 flye-goat_15818 flye-goat_17463 s9427.goat-hifiasm009589l_1
VC1213	12	98	6468	16500	0.2811	0.991713	Goat_Rumen-2__c900303 Roe_deer_Rumen-5__c468047_1 s1115.goat-hifiasm001158l s3549.dairy-hifiasm003550l Goat_Rumen-2__c635888 Roe_deer_Jejunum-3__c111093 Roe_deer_Rumen-5__c3839 Water_deer_Rumen-2__c74066 Water_deer_Rumen-4__c20698 Water_deer_Rumen-5__c389261 Roe_deer_Reticulum-1__c377 Roe_deer_Rumen-5__c1202
VC1214	3	149.3	448	3882	0.1033	0.904785	Roe_deer_Rumen-5__c46_1 Goat_Rumen-2__c686842 Roe_deer_Rumen-3__c237452
VC1215	2	394.6	394.6	1160	0.2531	0.979387	Roe_deer_Rumen-5__c486352 Water_deer_Rumen-1__c65634
VC1216	10	135.3	6088	6039	0.5012	0.0188177	Roe_deer_Rumen-5__c46_1 Water_deer_Rectum-1__c63366 2022NBT-16676_2 Roe_deer_Rumen-4__c2447 Water_deer_Rumen-1__c111543 Goat_Rumen-1__c620008 Goat_Rumen-6__c333546 Roe_deer_Rumen-3__c249950 Roe_deer_Rumen-5__c1829 s13800.goat-hifiasm014005l_1
VC1217	26	108.1	35100	10500	0.7696	0	flye-dairy_75682 s502.dairy-hifiasm000503l Goat_Colon-4__c417033 Roe_deer_Cecum-4__c95376 Water_deer_Cecum-2__c117127 Water_deer_Cecum-5__c964 2022NBT-2547_1 Dairy_cattle_Rectum-4__c533028 Goat_Ileum-1__c120341 Goat_Rumen-4__c3381_1 Roe_deer_Cecum-1__c748650 Roe_deer_Cecum-3__c361501 Roe_deer_Cecum-4__c2440 Roe_deer_Cecum-5__c6058 Roe_deer_Omasum-3__c1632 Sheep_Colon-2__c177232 Sheep_Rectum-3__c1…
VC1218	35	155.2	92400	21300	0.8119	0	contig_102326 Goat_Cecum-1__c21 Goat_Rumen-4__c352846 Roe_deer_Omasum-1__c1635_1 Roe_deer_Omasum-3__c916_1 Roe_deer_Rectum-5__c1960 Roe_deer_Rumen-2__c3515 Water_deer_Rumen-2__c285 Yak_Cecum-5__c138139 Yak_Rumen-2__c262699 contig_93322 Goat_Rumen-5__c902950_1 s932.goat-hifiasm000969l_2 Sheep_Omasum-1__c482301 Water_deer_Abomasum-4__c224142 Roe_deer_Rectum-1__c2384 Water_buffalos_Rectum-3__c7 Wate…
VC1219	46	58.29	60300	22900	0.7244	0	s4676.goat-hifiasm004786l 2022NBT-41924 contig_128437 2022NBT-68729 contig_96806_1 s44611.dairy-hifiasm044616l Roe_deer_Omasum-2__c2671_1 Sheep_Rectum-1__c438963 Water_buffalos_Colon-2__c541585 Water_buffalos_Colon-2__c553590 Water_buffalos_Colon-5__c2133 Water_buffalos_Rectum-5__c363515 Water_deer_Rectum-4__c2181 Yak_Cecum-5__c373269 Yak_Colon-3__c485848 Yak_Rectum-5__c45302 2022NBT-33458_1 2022…
VC1220	32	112.8	56000	61500	0.4763	6.02e-09	Sheep_Omasum-2__c1053222 2022NBT-2006_1 Goat_Abomasum-1__c235123 Goat_Cecum-3__c903562_1 Goat_Colon-3__c573526_1 Goat_Omasum-3__c69986 Goat_Omasum-5__c5091_1 Goat_Rectum-1__c459900 Goat_Rumen-1__c506_1 Goat_Rumen-2__c1151 Goat_Rumen-2__c220974 Goat_Rumen-3__c692041 Roe_deer_Cecum-1__c66692 Roe_deer_Cecum-1__c692_1 Roe_deer_Duodenum-1__c1027_1 Roe_deer_Omasum-4__c113967_1 Roe_deer_Reticulum-2__c12…
VC1221	3	239.3	717.9	7000	0.09295	0.985452	2022NBT-28546 Roe_deer_Rectum-4__c432128 Yak_Rectum-4__c132414
VC1222	5	50.66	506.6	4977	0.09221	0.996692	flye-dairy_24112 Water_deer_Abomasum-2__c188564 Water_buffalos_Rumen-2__c2432607 s45704.dairy-hifiasm045709l s9989.dairy-hifiasm009990l
VC1223	6	8.573	128.6	447	0.2188	0.712748	Dairy_cattle_Rumen-4__c577136 Sheep_Omasum-5__c384999 Sheep_Rumen-3__c1484479 Sheep_Rumen-3__c986758 Water_buffalos_Reticulum-3__c328874 Yak_Rumen-4__c984869
VC1224	2	196.5	196.5	2604	0.07005	0.979387	Water_deer_Reticulum-5__c356 Water_deer_Rumen-3__c729
VC1225	2	29.17	29.17	1415	0.02014	0.979387	Goat_Colon-1__c54107 Sheep_Colon-5__c338924
VC1226	2	111.3	111.3	2348	0.04517	0.979387	flye-goat_18782 s51307.dairy-hifiasm051312l
VC1227	2	14.9	14.9	9.199	0.5303	0.110336	Goat_Reticulum-1__c66391 Water_buffalos_Rumen-4__c2056310
VC1228	2	50.11	50.11	1304	0.0369	0.979387	flye-dairy_26110 flye-dairy_58810
VC1229	3	32.49	97.47	3061	0.0308	0.985452	Goat_Rumen-6__c1037 Goat_Reticulum-2__c429757 Goat_Abomasum-6__c90688
VC1230	22	76.61	17700	30600	0.366	0.113362	Water_buffalos_Omasum-5__c11205 Yak_Rectum-3__c11 2022NBT-36667 flye-dairy_57101 flye-dairy_81315 Sheep_Rumen-4__c1418627 s30432.dairy-hifiasm030435c 2022NBT-36649 Roe_deer_Abomasum-4__c609 Water_buffalos_Abomasum-1__c88148 Water_buffalos_Reticulum-5__c1248786_1 Water_buffalos_Rumen-1__c164_1 Water_buffalos_Rumen-3__c1862700 Yak_Duodenum-3__c118088 Yak_Reticulum-5__c77190 Yak_Rumen-1__c468525 Yak…
VC1231	2	120	120	1773	0.06327	0.979387	Roe_deer_Abomasum-4__c140262 Roe_deer_Reticulum-4__c98428
VC1232	8	139.9	3918	16700	0.19	0.813985	Goat_Reticulum-3__c623998_1 Water_deer_Colon-5__c952 Yak_Rumen-2__c1796749 Roe_deer_Rectum-5__c3033_1 Yak_Cecum-5__c601286 Sheep_Rumen-3__c1456696 Goat_Rumen-4__c106798 Sheep_Rumen-2__c280941
VC1233	27	85.2	29900	38200	0.4389	3.46e-05	Sheep_Rumen-5__c653365_1 Yak_Rectum-1__c36408 2022NBT-33056 Water_buffalos_Rectum-5__c7931 Water_buffalos_Rumen-3__c228_1 Sheep_Reticulum-2__c413730 Water_deer_Omasum-5__c71157 Water_buffalos_Rumen-1__c192151 Water_deer_Cecum-3__c350850 Yak_Rectum-1__c877763 Yak_Rectum-4__c501347 Goat_Reticulum-1__c707115_1 Goat_Rumen-1__c555514 Roe_deer_Abomasum-1__c2602_1 Roe_deer_Abomasum-2__c165_1 Roe_deer_Ru…
VC1234	73	123.3	324000	119000	0.7306	0	flye-dairy_28580 flye-dairy_47243 flye-dairy_52799 flye-goat_11155 s15014.dairy-hifiasm015015l s18451.dairy-hifiasm018453l s2136.dairy-hifiasm002137l s24766.dairy-hifiasm024768l s30196.dairy-hifiasm030199l s8981.dairy-hifiasm008982c flye-dairy_24973 flye-dairy_11218 flye-dairy_37588 flye-dairy_44492 flye-dairy_44495 flye-dairy_44881 s17910.dairy-hifiasm017912l s29968.dairy-hifiasm029971c s52749.d…
VC1235	20	12.32	2341	11800	0.1653	0.537714	Goat_Rumen-6__c2048 Roe_deer_Rumen-2__c1006 Water_deer_Reticulum-2__c37830 flye-dairy_24112 Water_deer_Abomasum-2__c188564 Water_buffalos_Rumen-2__c2432607 s9989.dairy-hifiasm009990l Roe_deer_Rumen-5__c235370 Roe_deer_Omasum-3__c7927 Sheep_Reticulum-3__c384831 Water_buffalos_Reticulum-3__c534259 Water_deer_Omasum-4__c159124 Water_buffalos_Rumen-3__c1342541 Water_buffalos_Rumen-4__c1033054 Water_d…
VC1236	12	74.41	4911	15100	0.2457	0.965518	Roe_deer_Rumen-2__c1628 flye-dairy_4464 Goat_Reticulum-5__c315 Goat_Rumen-4__c583 Roe_deer_Omasum-1__c1811 Roe_deer_Rumen-5__c3303 s5356.dairy-hifiasm005357l Sheep_Reticulum-4__c815716 Water_deer_Omasum-3__c252297 Water_deer_Rumen-2__c408820_1 s41287.dairy-hifiasm041292l s9490.dairy-hifiasm009491l
VC1237	5	8.932	89.32	491.2	0.1513	0.417018	Sheep_Cecum-3__c317809 Sheep_Colon-4__c571785 Goat_Rumen-3__c864930_1 Roe_deer_Cecum-4__c110844 Yak_Jejunum-5__c322706
VC1238	33	133.3	70400	58800	0.5446	0	Goat_Cecum-1__c784175 Goat_Rumen-5__c2577_1 Roe_deer_Cecum-2__c711_1 Sheep_Cecum-4__c164308 Sheep_Rectum-2__c269965 Sheep_Rectum-3__c985_1 Sheep_Rectum-5__c625 Water_buffalos_Cecum-2__c25_1 Water_buffalos_Cecum-4__c524964 Water_buffalos_Colon-1__c664739 Yak_Cecum-2__c505790_1 Yak_Rectum-4__c827092 Goat_Abomasum-2__c436798_1 Goat_Omasum-6__c322495 Goat_Rumen-1__c252610 Goat_Rumen-3__c767801_1 Shee…
VC1239	2	144.1	144.1	4390	0.03176	0.979387	Sheep_Omasum-4__c1077097 Sheep_Omasum-2__c705855
VC1240	19	14.19	2427	9889	0.1965	0.299616	2022NBT-12672 flye-dairy_24112 Water_deer_Abomasum-2__c188564 Water_buffalos_Rumen-2__c2432607 s45704.dairy-hifiasm045709l s9989.dairy-hifiasm009990l Roe_deer_Rumen-5__c235370 Roe_deer_Omasum-3__c7927 Sheep_Reticulum-3__c384831 Water_buffalos_Reticulum-3__c534259 Water_deer_Omasum-4__c159124 Water_buffalos_Rumen-3__c1342541 Water_buffalos_Rumen-4__c1033054 Water_deer_Omasum-1__c77553 Water_deer_R…
VC1241	2	26.9	26.9	1712	0.01544	0.979387	Sheep_Rumen-3__c573240 Sheep_Rumen-3__c1507660
VC1242	5	63.75	637.5	12700	0.04791	0.996692	Water_deer_Reticulum-5__c258034 Water_deer_Reticulum-5__c356 contig_7046 contig_85469 Water_deer_Rumen-3__c729
VC1243	3	17.61	52.83	247.8	0.1723	0.985452	Sheep_Rumen-4__c319982 Yak_Rectum-1__c263692 Sheep_Colon-3__c738903
VC1244	11	24.97	1373	1033	0.5655	0.000116453	Yak_Colon-2__c323066 Sheep_Rumen-2__c1016977 Water_buffalos_Rumen-1__c106210 Water_deer_Rectum-3__c533829 Yak_Colon-4__c493700 Roe_deer_Reticulum-5__c41159 Sheep_Abomasum-4__c316024 Sheep_Cecum-5__c211276 Yak_Colon-3__c520380 Yak_Colon-4__c642252 Yak_Rectum-4__c983838
VC1245	2	360.3	360.3	2984	0.1076	0.979387	Goat_Ileum-2__c113210 flye-dairy_34017
VC1246	2	61.98	61.98	1103	0.05303	0.979387	Roe_deer_Reticulum-5__c80949 Goat_Jejunum-1__c136442
VC1247	2	344.4	344.4	1893	0.1536	0.979387	contig_129993 contig_65736_1
VC1248	5	128.3	1283	6585	0.1629	0.996692	Goat_Omasum-1__c350481_1 Sheep_Rumen-1__c611266 s37270.dairy-hifiasm037274l Sheep_Rumen-5__c1653685 Yak_Rumen-3__c417719
VC1249	38	87.89	61800	66900	0.4797	0	contig_39844 flye-dairy_23864 flye-dairy_29197 flye-dairy_29199 flye-dairy_29200 flye-dairy_29203 flye-dairy_44309 flye-dairy_61575 flye-dairy_69778 s19353.dairy-hifiasm019355l s75035.dairy-hifiasm075046l s76602.dairy-hifiasm076614l Yak_Duodenum-3__c49645 flye-dairy_62558 flye-dairy_13533 flye-dairy_29981 flye-dairy_45511 flye-dairy_58059 flye-dairy_60808 flye-dairy_65231 flye-dairy_68382 s42465.…
VC1250	4	13.45	80.68	2295	0.03384	0.992931	contig_53135 contig_22874 contig_40813 contig_49464
VC1251	26	119.3	38800	37400	0.5089	1.02e-08	contig_90952 flye-dairy_76927 2022NBT-39484 Goat_Omasum-4__c92109_1 Sheep_Rumen-2__c1108770 contig_116542 flye-dairy_21917 flye-dairy_36943 flye-dairy_36944 flye-dairy_51322 flye-dairy_57743 flye-dairy_71359 s17619.dairy-hifiasm017620l s26287.dairy-hifiasm026289l s32641.dairy-hifiasm032644l s42035.dairy-hifiasm042040l s44649.dairy-hifiasm044654l Yak_Duodenum-3__c356299 Dairy_cattle_Jejunum-1__c19…
VC1252	2	4.657	4.657	52.16	0.07656	0.979387	Goat_Rumen-1__c1469 Sheep_Rumen-1__c1140936
VC1253	3	215.8	647.3	10200	0.0598	0.985452	flye-dairy_69360 flye-goat_20663 Sheep_Rumen-5__c1418804
VC1254	6	55.54	833.1	8601	0.0882	0.998474	flye-dairy_1593 Sheep_Reticulum-2__c450049 flye-dairy_43231 flye-dairy_71076 flye-dairy_79656 s670.dairy-hifiasm000671l_1
VC1255	2	8.572	8.572	472.3	0.01768	0.979387	flye-dairy_62353 s54123.dairy-hifiasm054128l
VC1256	2	54.03	54.03	1212	0.04254	0.979387	Roe_deer_Rumen-5__c582285 Goat_Abomasum-3__c297096
VC1257	30	186.1	81000	32600	0.7123	0	2022NBT-76022 Dairy_cattle_Duodenum-3__c115000 Goat_Reticulum-3__c761411 Roe_deer_Rumen-4__c555_1 Sheep_Abomasum-2__c210623 Water_buffalos_Rumen-5__c1957766_1 Yak_Abomasum-1__c389697 Yak_Jejunum-5__c248026 Yak_Omasum-3__c402535 Yak_Rectum-1__c201668_1 Yak_Rumen-4__c1056756 contig_40396 flye-dairy_31046 flye-dairy_31054 flye-dairy_43111 flye-dairy_50359 flye-dairy_55675 flye-dairy_59102 flye-dairy…
VC1258	5	53.22	532.2	7319	0.06769	0.993907	2022NBT-107253 Water_deer_Omasum-1__c204814 Water_deer_Reticulum-5__c231647 contig_118121 s14148.dairy-hifiasm014149l
VC1259	2	77.9	77.9	1566	0.04728	0.979387	contig_118121 s14148.dairy-hifiasm014149l
VC1260	7	59.35	1246	505.5	0.7058	0.00108251	s31533.dairy-hifiasm031536c s89707.dairy-hifiasm089722l Water_buffalos_Rumen-5__c1161003 Dairy_cattle_Rectum-6__c909642 flye-goat_6805 s20377.goat-hifiasm020622l s47912.dairy-hifiasm047917l
VC1261	3	464.3	1393	979.5	0.5857	0.0404278	2022NBT-11426 2022NBT-11774 Roe_deer_Cecum-3__c880
VC1262	3	256.2	768.6	2120	0.2655	0.985452	2022NBT-10734 s11202.dairy-hifiasm011203l s243.goat-hifiasm000248l_2
VC1263	3	131.9	395.8	406.8	0.4895	0.191367	2022NBT-30102 2022NBT-52674 Goat_Cecum-2__c84183_1
VC1264	14	239.6	21800	6810	0.7613	3.73e-06	Goat_Duodenum-3__c238 Sheep_Colon-4__c916848 Sheep_Ileum-1__c103129 Water_deer_Abomasum-4__c112639 Yak_Jejunum-5__c238733 Yak_Jejunum-5__c239232 contig_166932 contig_66857 flye-dairy_34108 flye-dairy_55234 flye-dairy_79093 flye-dairy_80276 s27061.dairy-hifiasm027063l s662.goat-hifiasm000687l
VC1265	10	376.3	16900	7079	0.7046	9.13e-05	Sheep_Colon-2__c1358 Sheep_Ileum-4__c54804 Sheep_Rumen-1__c1545741 Water_buffalos_Colon-3__c69369 Yak_Cecum-5__c448370 flye-dairy_66464 flye-dairy_79344 flye-dairy_80939 Sheep_Ileum-4__c211222 Yak_Rumen-3__c2735006
VC1266	5	258	2580	3690	0.4108	0.0473465	Sheep_Duodenum-5__c29754 Yak_Cecum-5__c55113 Yak_Colon-3__c681738 Yak_Jejunum-5__c159161 Dairy_cattle_Colon-5__c591904
VC1267	2	315.9	315.9	474.4	0.3977	0.110336	Water_buffalos_Cecum-5__c652589 s1722.goat-hifiasm001781l_1
VC1268	3	537.5	1613	3650	0.3061	0.808633	Yak_Duodenum-3__c66 flye-dairy_28738 Yak_Rumen-5__c857338
VC1269	2	349.3	349.3	186.8	0.6468	0.110336	Yak_Rumen-4__c291070 s1961.dairy-hifiasm001962l
VC1270	2	599	599	1835	0.2457	0.979387	Yak_Rumen-5__c859842 flye-dairy_30686
VC1271	7	102.6	2154	0	0.9935	0.000528788	2022NBT-107951 2022NBT-107346 Goat_Ileum-6__c43094 Sheep_Duodenum-3__c203906 Water_buffalos_Cecum-4__c381632 Water_deer_Cecum-3__c173497 Yak_Duodenum-3__c308898
VC1272	2	400.3	400.3	1872	0.1759	0.979387	2022NBT-19395 2022NBT-24358
VC1273	4	6.759	40.55	167.9	0.1874	0.557383	2022NBT-112465 Goat_Cecum-6__c498400 Roe_deer_Cecum-2__c533996 Roe_deer_Cecum-3__c2588
VC1274	2	15.66	15.66	143	0.09628	0.979387	Sheep_Cecum-3__c218444 2022NBT-21464
VC1275	8	427.6	12000	42100	0.2214	0.990935	Dairy_cattle_Jejunum-1__c202054 contig_139756 flye-dairy_15261 flye-dairy_15262 flye-dairy_15265 flye-dairy_78334 s21029.dairy-hifiasm021031c s60579.dairy-hifiasm060585l
VC1276	2	109.1	109.1	1173	0.08486	0.979387	2022NBT-8601 Goat_Rumen-1__c580901
VC1277	9	94.85	3415	2788	0.5489	0.000543124	Goat_Rumen-2__c823887 Roe_deer_Abomasum-4__c47021 Roe_deer_Rumen-1__c207035 Sheep_Rectum-3__c32971 Water_buffalos_Rumen-1__c716792 Water_deer_Rectum-3__c75334 Water_deer_Reticulum-5__c115 s14805.dairy-hifiasm014806l Water_buffalos_Rumen-3__c600706
VC1278	2	499.9	499.9	1085	0.3146	0.658454	Roe_deer_Rumen-3__c1488 Roe_deer_Reticulum-3__c196226
VC1279	6	149.3	2240	5941	0.2734	0.935897	Goat_Omasum-1__c190929 flye-dairy_64972 flye-dairy_79186 s86424.dairy-hifiasm086439c Goat_Rumen-1__c852239_1 Yak_Omasum-5__c384510
VC1280	3	43.52	130.6	706.4	0.1549	0.808633	Goat_Omasum-3__c319846 s34538.goat-hifiasm034898l s6939.goat-hifiasm007075l
VC1281	3	34.16	102.5	1247	0.0756	0.808633	Sheep_Ileum-4__c8325 s32673.dairy-hifiasm032676l Sheep_Omasum-1__c909142
VC1282	8	205.2	5747	12300	0.3176	0.681749	Goat_Rumen-2__c54844 Water_deer_Reticulum-2__c275777 Water_deer_Rumen-1__c90539_1 flye-goat_20027_1 flye-goat_369_1 s422.goat-hifiasm000437c_3 s90584.dairy-hifiasm090599l Goat_Rumen-4__c962233
VC1283	2	202.9	202.9	502.3	0.286	0.979387	Roe_deer_Abomasum-5__c205 Roe_deer_Omasum-5__c541
VC1284	4	117.6	705.3	6283	0.1008	0.984809	Roe_deer_Omasum-2__c251 Roe_deer_Rumen-2__c164628 Sheep_Rumen-1__c1041866_1 Roe_deer_Rumen-2__c767
VC1285	2	324	324	2579	0.1114	0.979387	Roe_deer_Omasum-2__c251 Roe_deer_Rumen-2__c767
VC1286	2	142.2	142.2	1693	0.07732	0.979387	contig_179694 contig_38116
VC1287	2	286	286	3274	0.08026	0.979387	Water_buffalos_Rumen-2__c319905 flye-dairy_67125
VC1288	23	51.26	13000	3643	0.7786	3.3e-09	2022NBT-27023 2022NBT-23043_1 2022NBT-45524_1 2022NBT-47541 2022NBT-5395_1 2022NBT-59006 2022NBT-72997 Goat_Cecum-2__c255985 Roe_deer_Cecum-3__c86477 Sheep_Rumen-1__c502624 Sheep_Rumen-3__c1264153 Sheep_Rumen-3__c482696 Water_deer_Abomasum-4__c268 Water_deer_Cecum-2__c150025 Water_deer_Rectum-2__c1803 Yak_Rumen-5__c1428002 s15986.dairy-hifiasm015987c s16056.dairy-hifiasm016057l s18359.dairy-hifia…
VC1289	2	394.8	394.8	3434	0.103	0.979387	contig_123767 contig_148986
VC1290	3	239.3	718	6664	0.09718	0.985452	contig_37122 contig_118493 contig_3613
VC1291	3	20.18	60.55	1015	0.05597	0.985452	2022NBT-76572 2022NBT-94505 Roe_deer_Cecum-3__c332171
VC1292	2	20.87	20.87	277.5	0.06903	0.979387	Goat_Rectum-5__c505676 Sheep_Cecum-3__c529269
VC1293	2	45.36	45.36	756.2	0.0563	0.979387	Roe_deer_Abomasum-2__c902 Sheep_Rectum-5__c794370
VC1294	2	10.96	10.96	335.4	0.03127	0.979387	flye-goat_2418 Roe_deer_Abomasum-1__c250756
VC1295	3	141.1	423.3	4793	0.08105	0.985452	2022NBT-32379 2022NBT-32566 2022NBT-46983
VC1296	23	107	27100	38600	0.4116	0.00693625	Sheep_Rumen-1__c751922_1 Roe_deer_Jejunum-3__c1935 Sheep_Omasum-4__c21216 Sheep_Rumen-3__c1299423 Sheep_Omasum-4__c142452 Sheep_Abomasum-1__c372251 Sheep_Omasum-2__c396622 Goat_Duodenum-1__c168750 Goat_Jejunum-6__c33565 Goat_Reticulum-4__c331378 Roe_deer_Rumen-5__c244844_1 Sheep_Duodenum-4__c260073 Sheep_Omasum-1__c461629 Sheep_Rectum-3__c502254_1 Sheep_Reticulum-1__c506076 Sheep_Rumen-1__c506 Sh…
VC1297	2	14.35	14.35	58.94	0.1856	0.979387	Dairy_cattle_Rectum-6__c114166 Roe_deer_Cecum-1__c1267
VC1298	2	104.3	104.3	58.18	0.6264	0.110336	2022NBT-108006 Goat_Colon-1__c247
VC1299	25	184.5	55400	37900	0.5935	0	Goat_Rumen-1__c742 Roe_deer_Reticulum-2__c2683 Sheep_Reticulum-3__c925875 Sheep_Rumen-1__c90962 Sheep_Rumen-5__c382120 Yak_Rumen-5__c1472726 Yak_Rumen-5__c1811830 flye-dairy_45636_1 flye-dairy_56729 flye-dairy_72786 flye-dairy_74515 flye-dairy_79837 flye-dairy_80160 flye-dairy_80692 flye-dairy_81137 flye-dairy_8550 s11725.dairy-hifiasm011726l s14322.dairy-hifiasm014323l s1618.dairy-hifiasm001619l…
VC1300	2	600	600	5197	0.1034	0.979387	Roe_deer_Reticulum-2__c2683 Roe_deer_Omasum-2__c2393
VC1301	14	69.35	6311	16000	0.2822	0.0676794	Water_deer_Rumen-3__c325210 contig_45654 s9702.dairy-hifiasm009703l Water_deer_Rumen-5__c24343 Water_deer_Rumen-5__c447434_1 s70644.dairy-hifiasm070655l Goat_Abomasum-6__c379778_1 2022NBT-66870 Goat_Rumen-2__c482600_1 Goat_Rumen-2__c756851 Water_buffalos_Abomasum-5__c1001229 Water_deer_Rumen-3__c418278 Water_deer_Rumen-4__c283648 flye-goat_18248
VC1302	2	24.03	24.03	174.5	0.1186	0.979387	2022NBT-77129 Roe_deer_Cecum-5__c59129
VC1303	2	161.1	161.1	14.25	0.8983	0.110336	2022NBT-109537 2022NBT-108135
VC1304	8	114.8	3213	3964	0.4467	0.00370277	2022NBT-2147_1 2022NBT-57168 2022NBT-60540 Dairy_cattle_Duodenum-1__c447156 Dairy_cattle_Duodenum-3__c95405 flye-dairy_51421 s20579.dairy-hifiasm020581c s60143.dairy-hifiasm060149c
VC1305	2	282.4	282.4	66.77	0.7996	0.110336	2022NBT-47586 2022NBT-57374
VC1306	79	22.31	68800	31700	0.6835	0	2022NBT-116234 2022NBT-109202 Dairy_cattle_Duodenum-1__c123632 Dairy_cattle_Duodenum-3__c104018 Dairy_cattle_Duodenum-3__c365506 Dairy_cattle_Duodenum-3__c378469 Dairy_cattle_Duodenum-3__c689977 Dairy_cattle_Duodenum-3__c711203 Dairy_cattle_Duodenum-3__c756994 Dairy_cattle_Duodenum-3__c773204 Dairy_cattle_Duodenum-3__c793129 Dairy_cattle_Jejunum-2__c781213 Dairy_cattle_Jejunum-2__c819113 Dairy_ca…
VC1307	10	22.54	1014	2913	0.257	0.236338	Goat_Rumen-5__c678834 Goat_Rumen-6__c246554 Sheep_Colon-3__c607242 Water_buffalos_Rectum-5__c83337 s74792.dairy-hifiasm074803c 2022NBT-97001 Sheep_Rumen-1__c1174618 Water_buffalos_Rumen-4__c1752290 Water_buffalos_Rumen-5__c1172661 Yak_Rectum-1__c976790
VC1308	3	66.32	199	3666	0.0514	0.986587	Dairy_cattle_Duodenum-1__c123632 Dairy_cattle_Duodenum-3__c365506 Goat_Duodenum-3__c110979
VC1309	11	70.98	3904	6674	0.3683	0.29968	Dairy_cattle_Duodenum-3__c104018 Dairy_cattle_Duodenum-3__c773204 Goat_Duodenum-1__c438 Roe_deer_Jejunum-1__c119782 Sheep_Ileum-4__c66427 Sheep_Rumen-2__c573023 Yak_Jejunum-5__c70914 Yak_Jejunum-5__c87992 Dairy_cattle_Duodenum-3__c776628 Dairy_cattle_Duodenum-2__c146619 Dairy_cattle_Duodenum-3__c254836
VC1310	14	20.18	1837	4304	0.2977	0.74743	Dairy_cattle_Duodenum-3__c358995 Goat_Abomasum-5__c436945 Goat_Rumen-5__c678834 Goat_Rumen-6__c246554 Roe_deer_Rumen-2__c20198 Sheep_Colon-3__c607242 Sheep_Rumen-3__c838202 Water_buffalos_Rectum-5__c83337 s74792.dairy-hifiasm074803c 2022NBT-97001 Sheep_Rumen-1__c1174618 Water_buffalos_Rumen-4__c1752290 Water_buffalos_Rumen-5__c1172661 Yak_Rectum-1__c976790
VC1311	14	21.23	1932	9025	0.1759	0.999971	Dairy_cattle_Jejunum-1__c223863 Dairy_cattle_Jejunum-6__c160787 Roe_deer_Cecum-1__c712638 Roe_deer_Rumen-5__c372728 Sheep_Abomasum-5__c436 Sheep_Duodenum-2__c43473 Sheep_Duodenum-5__c8723 Sheep_Ileum-3__c100536 Water_buffalos_Abomasum-1__c378570 Water_buffalos_Rectum-3__c213758 Water_deer_Colon-2__c341804 Yak_Cecum-2__c64162 Dairy_cattle_Rectum-3__c982548 Goat_Rumen-2__c715960
VC1312	6	29.69	445.4	657.5	0.3995	0.0463479	s74792.dairy-hifiasm074803c 2022NBT-97001 Sheep_Rumen-1__c1174618 Water_buffalos_Rumen-4__c1752290 Water_buffalos_Rumen-5__c1172661 Yak_Rectum-1__c976790
VC1313	34	26.86	15100	22300	0.4021	0.00606517	Dairy_cattle_Duodenum-3__c104018 Dairy_cattle_Duodenum-3__c689977 Dairy_cattle_Duodenum-3__c773204 Goat_Duodenum-1__c438 Goat_Ileum-2__c109303 Goat_Rumen-1__c809614 Roe_deer_Jejunum-1__c119782 Sheep_Ileum-1__c50906 Sheep_Ileum-2__c23130 Sheep_Ileum-4__c66427 Sheep_Rumen-2__c573023 Sheep_Rumen-4__c3116 Yak_Abomasum-5__c53314 Yak_Jejunum-5__c70914 Yak_Jejunum-5__c87992 flye-dairy_54354 flye-dairy_5…
VC1314	21	12.05	2530	9438	0.2106	0.973636	Dairy_cattle_Jejunum-1__c223863 Dairy_cattle_Jejunum-2__c824627 Dairy_cattle_Jejunum-6__c160787 Roe_deer_Cecum-1__c712638 Roe_deer_Rumen-5__c372728 Sheep_Duodenum-2__c43473 Sheep_Duodenum-5__c8723 Sheep_Ileum-1__c53178 Sheep_Ileum-3__c100536 Water_buffalos_Abomasum-1__c378570 Water_buffalos_Rectum-3__c213758 Water_deer_Colon-2__c341804 Yak_Cecum-2__c64162 Dairy_cattle_Rectum-3__c982548 s74792.dai…
VC1315	2	57.99	57.99	694.9	0.07662	0.979387	Goat_Duodenum-6__c206933 Roe_deer_Abomasum-5__c995
VC1316	3	47.29	141.9	2035	0.065	0.985452	Roe_deer_Cecum-1__c712638 Water_deer_Colon-2__c341804 Dairy_cattle_Rectum-3__c982548
VC1317	11	51.58	2837	4637	0.3784	0.146644	Dairy_cattle_Duodenum-3__c416657 Goat_Ileum-1__c158558 Sheep_Duodenum-3__c297820 Sheep_Jejunum-3__c68 Water_buffalos_Rumen-1__c266584 Goat_Jejunum-5__c27950 Sheep_Abomasum-4__c504291 Sheep_Ileum-4__c267081 Yak_Duodenum-1__c396933 Yak_Jejunum-5__c184129 Sheep_Duodenum-3__c318877_1
VC1318	2	157.6	157.6	1012	0.1342	0.979387	Sheep_Jejunum-3__c131112 Water_buffalos_Rumen-5__c113950
VC1319	2	7.74	7.74	302.3	0.02465	0.979387	Yak_Jejunum-5__c42601 Yak_Omasum-1__c165941
VC1320	16	143.2	17200	4924	0.7761	7.72e-07	Roe_deer_Cecum-1__c750809 Goat_Jejunum-1__c21 Goat_Rumen-6__c32396 Sheep_Ileum-1__c240497 Sheep_Jejunum-2__c301812 Yak_Cecum-2__c509371 Dairy_cattle_Reticulum-2__c641293 Goat_Jejunum-2__c41951 Roe_deer_Rumen-4__c2865_1 Sheep_Duodenum-5__c3522 Vibrio~phage~X29 Water_deer_Abomasum-4__c220890 Yak_Rectum-4__c454346 flye-dairy_76855 s11314.dairy-hifiasm011315l s26428.goat-hifiasm026732l
VC1321	5	77.31	773.1	347.5	0.6838	0.0107859	Roe_deer_Cecum-2__c486149 Yak_Cecum-5__c434118 Yak_Cecum-5__c657336 Yak_Colon-3__c424535 Water_buffalos_Colon-2__c129062
VC1322	2	142.7	142.7	5242	0.02648	0.979387	Dairy_cattle_Rumen-1__c371 contig_100035
VC1323	2	477	477	1918	0.1988	0.979387	Goat_Rumen-2__c171900 s3655.dairy-hifiasm003656l
VC1324	8	234.3	6561	10100	0.3931	0.135074	Roe_deer_Omasum-2__c3004 Sheep_Rumen-5__c627623 flye-dairy_46111 flye-dairy_40519 s500.dairy-hifiasm000501l s32122.dairy-hifiasm032125l s3049.dairy-hifiasm003050l s46344.dairy-hifiasm046349l
VC1325	7	129.8	2726	16800	0.1394	0.989275	2022NBT-15089 2022NBT-24082 Dairy_cattle_Cecum-2__c871579 s52940.dairy-hifiasm052945l s21317.dairy-hifiasm021319l contig_133195 contig_134381
VC1326	5	269.4	2694	11300	0.1928	0.952654	Water_deer_Abomasum-1__c135735 Yak_Rumen-2__c194008 flye-dairy_28849 flye-dairy_41802 flye-dairy_53132
VC1327	8	71.77	2009	1441	0.5797	0.00679364	contig_46144 Goat_Duodenum-1__c11551 Roe_deer_Rectum-1__c3130 s3761.dairy-hifiasm003762l Roe_deer_Cecum-3__c470647_1 Water_deer_Cecum-2__c461274 contig_108478 contig_36291
VC1328	2	11.55	11.55	472.7	0.02366	0.979387	flye-dairy_7883 Water_deer_Omasum-5__c63876
VC1329	36	313.8	198000	33700	0.8542	0	2022NBT-40654 2022NBT-41336 Dairy_cattle_Duodenum-1__c228825 Dairy_cattle_Duodenum-3__c128226 Dairy_cattle_Duodenum-3__c151 Dairy_cattle_Duodenum-3__c1589 Dairy_cattle_Duodenum-3__c2461 Dairy_cattle_Jejunum-1__c427703 Dairy_cattle_Jejunum-1__c621429 Dairy_cattle_Jejunum-2__c1038 Dairy_cattle_Jejunum-2__c691721 Yak_Cecum-2__c625997 Yak_Duodenum-3__c268123 Yak_Duodenum-3__c83358 Yak_Jejunum-5__c956…
VC1330	171	26.22	381000	213000	0.6408	0	2022NBT-109576 Dairy_cattle_Cecum-5__c108520 Dairy_cattle_Colon-5__c461621 Dairy_cattle_Duodenum-1__c127065 Dairy_cattle_Duodenum-1__c226062 Dairy_cattle_Duodenum-3__c102939 Dairy_cattle_Duodenum-3__c18696 Dairy_cattle_Duodenum-3__c192109 Dairy_cattle_Duodenum-3__c194356 Dairy_cattle_Duodenum-3__c211392 Dairy_cattle_Duodenum-3__c216371 Dairy_cattle_Duodenum-3__c216772 Dairy_cattle_Duodenum-3__c22…
VC1331	42	25.64	22100	31500	0.4115	0.000201403	Dairy_cattle_Colon-5__c764440 Dairy_cattle_Duodenum-3__c2846 Dairy_cattle_Jejunum-6__c248336 Sheep_Jejunum-1__c195183 Water_buffalos_Jejunum-5__c91617 Yak_Colon-2__c765245 Yak_Duodenum-3__c180 Water_buffalos_Jejunum-2__c165977 Yak_Duodenum-1__c36740 Dairy_cattle_Duodenum-1__c164796 Dairy_cattle_Duodenum-3__c572109 Dairy_cattle_Duodenum-3__c649578 Dairy_cattle_Duodenum-3__c82774 Dairy_cattle_Jejun…
VC1332	5	47.01	470.1	2188	0.1762	0.996692	Dairy_cattle_Duodenum-1__c360349 Dairy_cattle_Duodenum-3__c466 Sheep_Jejunum-3__c251 Yak_Duodenum-1__c352134 Dairy_cattle_Duodenum-3__c336387
VC1333	15	41.08	4314	44500	0.08833	0.99999	Dairy_cattle_Duodenum-1__c407403 Dairy_cattle_Duodenum-3__c216371 Dairy_cattle_Duodenum-3__c2267 Dairy_cattle_Duodenum-6__c173915 Dairy_cattle_Jejunum-2__c1170 Dairy_cattle_Jejunum-2__c866803 Dairy_cattle_Jejunum-6__c396 Water_buffalos_Rumen-2__c694856 Water_buffalos_Rumen-3__c1137710 Yak_Cecum-4__c435114 Yak_Jejunum-5__c45123 Yak_Jejunum-5__c95497 Yak_Rumen-4__c493925 Yak_Jejunum-5__c217690 Dair…
VC1334	6	76.24	1144	7292	0.1354	0.935897	Dairy_cattle_Duodenum-3__c1163 Dairy_cattle_Jejunum-2__c432627 Dairy_cattle_Rectum-3__c345447 Sheep_Duodenum-5__c193023 Yak_Duodenum-3__c135674 Dairy_cattle_Colon-3__c217513
VC1335	24	50.27	13900	80700	0.1466	0.999993	Dairy_cattle_Duodenum-3__c18696 Dairy_cattle_Duodenum-3__c2242 Sheep_Abomasum-1__c127198 Water_buffalos_Jejunum-2__c89206 Water_buffalos_Rumen-5__c1280377 Yak_Cecum-2__c485750 Yak_Cecum-2__c992157 Yak_Duodenum-1__c12259 Yak_Duodenum-3__c161102 Yak_Duodenum-3__c379107 Yak_Jejunum-5__c140314 Yak_Jejunum-5__c166265 Yak_Jejunum-5__c179665 Yak_Jejunum-5__c201177 Yak_Jejunum-5__c49353 Yak_Jejunum-5__c5…
VC1336	6	40.51	607.7	2201	0.2154	0.189239	Dairy_cattle_Jejunum-1__c107331 Yak_Duodenum-3__c70693 Goat_Duodenum-3__c545 Yak_Cecum-2__c846303 Yak_Jejunum-5__c282352 Yak_Duodenum-3__c223906
VC1337	14	67.68	6159	8343	0.4239	0.000219481	Goat_Duodenum-3__c9758 Sheep_Duodenum-5__c143638 Goat_Jejunum-1__c178530 Sheep_Duodenum-1__c748 Sheep_Duodenum-4__c50846 Sheep_Ileum-1__c192 Sheep_Jejunum-1__c198190 Sheep_Jejunum-2__c309546 Sheep_Rectum-4__c266571 Water_buffalos_Cecum-2__c64924 Yak_Abomasum-5__c104415 Yak_Duodenum-1__c322304 Yak_Duodenum-3__c381961 Yak_Jejunum-5__c112201
VC1338	17	67.4	9167	1208	0.8807	3.46e-07	Sheep_Ileum-4__c156437 Sheep_Jejunum-1__c1695 Sheep_Jejunum-1__c87254 Water_buffalos_Rectum-1__c45367 Water_buffalos_Rumen-1__c432402 Yak_Cecum-1__c842046 Yak_Duodenum-1__c366462 Yak_Duodenum-1__c396461 Yak_Duodenum-3__c328678 Yak_Duodenum-3__c461073 Yak_Duodenum-3__c66258 Yak_Duodenum-3__c98 Yak_Jejunum-5__c156659 Yak_Jejunum-5__c235851 Yak_Rectum-1__c359752 Sheep_Jejunum-1__c195225 Yak_Duodenum…
VC1339	3	34.71	104.1	3897	0.02598	0.985452	Dairy_cattle_Duodenum-3__c96514 Dairy_cattle_Jejunum-1__c688170 Dairy_cattle_Duodenum-3__c398816
VC1340	30	38.82	16900	43900	0.2777	0.342159	Dairy_cattle_Duodenum-6__c129913 Dairy_cattle_Jejunum-1__c642550 Dairy_cattle_Jejunum-6__c42927 Goat_Duodenum-3__c9758 Sheep_Duodenum-5__c143638 Yak_Cecum-2__c587012 Yak_Colon-2__c295868 Yak_Duodenum-1__c354607 Yak_Duodenum-3__c318215 Yak_Jejunum-5__c313349 Yak_Rumen-5__c748104 Dairy_cattle_Duodenum-6__c126787 Sheep_Duodenum-2__c292080 Sheep_Ileum-2__c78520 Yak_Duodenum-1__c103556 Yak_Duodenum-3_…
VC1341	3	52.51	157.5	2939	0.05077	0.985452	Dairy_cattle_Jejunum-1__c233387 Dairy_cattle_Jejunum-2__c1224 Dairy_cattle_Jejunum-2__c860619
VC1342	2	121	121	468.8	0.2037	0.979387	Dairy_cattle_Duodenum-3__c614513 Dairy_cattle_Jejunum-2__c1741473
VC1343	9	37.73	1358	3301	0.2904	0.874501	Dairy_cattle_Jejunum-1__c447768 Dairy_cattle_Jejunum-2__c743925 Yak_Jejunum-5__c231879 Yak_Rectum-5__c1044833 Dairy_cattle_Duodenum-3__c348242 Dairy_cattle_Duodenum-2__c708543 Dairy_cattle_Duodenum-3__c554763 Dairy_cattle_Jejunum-2__c611601 Yak_Rectum-4__c765707
VC1344	11	83.52	4594	14000	0.2469	0.999971	Salmonella~phage~astrithr Water_deer_Cecum-1__c185779 Water_deer_Cecum-1__c354108 Water_deer_Colon-1__c382609 Water_deer_Ileum-2__c259 Water_deer_Ileum-2__c53663 Water_deer_Ileum-3__c56834 Water_deer_Ileum-4__c363 Water_deer_Ileum-5__c6891 Water_deer_Rectum-3__c312751 Water_deer_Rumen-1__c199745
VC1345	17	25.67	3491	13300	0.2079	0.5	Dairy_cattle_Duodenum-3__c166771 Dairy_cattle_Duodenum-3__c420073 Dairy_cattle_Jejunum-2__c1526789 Water_buffalos_Rectum-1__c927524 Yak_Cecum-1__c785241 Yak_Duodenum-1__c103106 Yak_Duodenum-1__c71212 Yak_Jejunum-5__c42140 Sheep_Abomasum-2__c70749 Sheep_Ileum-4__c136730 Sheep_Jejunum-3__c61539 Yak_Cecum-1__c61 Yak_Colon-2__c390684 Yak_Duodenum-1__c203480 Yak_Duodenum-1__c379926 Yak_Colon-2__c14877…
VC1346	5	49.63	496.3	14700	0.0327	0.996692	Yak_Rectum-1__c1006296 Yak_Rectum-4__c339429 Yak_Rectum-4__c406488 Water_deer_Colon-2__c301870 Yak_Colon-4__c872904
VC1347	15	84.27	8849	40100	0.1806	0.999976	Water_buffalos_Jejunum-5__c385 Dairy_cattle_Duodenum-1__c488772 Dairy_cattle_Duodenum-3__c663194 Dairy_cattle_Duodenum-6__c7700 Yak_Cecum-2__c877086 Yak_Cecum-2__c886259 Yak_Duodenum-1__c295503 Yak_Duodenum-1__c303852 Yak_Duodenum-3__c238337 Yak_Duodenum-3__c25 Yak_Duodenum-3__c40335 Yak_Jejunum-5__c126693 Yak_Jejunum-5__c242242 Yak_Jejunum-5__c275429 Water_buffalos_Rectum-2__c276488
VC1348	3	141.2	423.6	8989	0.04497	0.985452	Dairy_cattle_Duodenum-3__c222724 Dairy_cattle_Jejunum-2__c778841 Yak_Jejunum-5__c228826
VC1349	9	42.23	1520	2368	0.3891	0.0788522	Sheep_Abomasum-2__c70749 Sheep_Ileum-4__c136730 Sheep_Jejunum-3__c61539 Yak_Cecum-1__c61 Yak_Colon-2__c390684 Yak_Duodenum-1__c203480 Yak_Duodenum-1__c379926 Yak_Colon-2__c148774 Yak_Duodenum-1__c268668
VC1350	4	68.2	409.2	1168	0.2581	0.905709	Yak_Jejunum-5__c188781 Yak_Cecum-2__c805188 Yak_Duodenum-3__c93550 Yak_Jejunum-5__c3467
VC1351	2	17.26	17.26	185.5	0.08349	0.658454	Goat_Abomasum-6__c301 s120.goat-hifiasm000121l_1
VC1352	2	243.1	243.1	1279	0.1594	0.979387	2022NBT-79090 Roe_deer_Rectum-5__c2251
VC1353	19	117.6	20100	4305	0.8224	7.39e-08	Goat_Cecum-4__c717835_1 2022NBT-38290_1 Roe_deer_Reticulum-4__c69093_1 Roe_deer_Colon-3__c422203_1 Water_buffalos_Cecum-4__c216350 2022NBT-60641 2022NBT-66304 2022NBT-66307 Roe_deer_Colon-5__c337_1 Roe_deer_Colon-2__c182480 Water_deer_Rectum-3__c123630 2022NBT-57566 Roe_deer_Cecum-2__c196484 Roe_deer_Omasum-2__c1846 Roe_deer_Rectum-2__c140667 Roe_deer_Rectum-3__c93142 Water_buffalos_Cecum-1__c577…
VC1354	17	118	16100	7079	0.6929	3.53e-07	Water_deer_Rectum-1__c367097_1 Water_deer_Omasum-2__c13670 2022NBT-21928_1 Goat_Colon-3__c106101 Goat_Cecum-6__c792151_1 2022NBT-3015_1 Roe_deer_Rumen-5__c3222 Water_deer_Rectum-4__c33916 Butyrivibrio~virus~Arawn Roe_deer_Reticulum-4__c23870_1 Roe_deer_Rumen-1__c383022 Roe_deer_Rumen-2__c64989 Sheep_Abomasum-4__c79034 Sheep_Abomasum-5__c400352 Water_buffalos_Rectum-5__c447075 Water_deer_Colon-4__…
VC1355	3	81.94	245.8	2341	0.0948	0.985452	Water_buffalos_Colon-4__c100082_1 2022NBT-68879 Yak_Rectum-5__c589702
VC1356	50	45.17	55300	11000	0.8335	0	2022NBT-119922 2022NBT-109932 2022NBT-122969 Dairy_cattle_Duodenum-1__c207351 Dairy_cattle_Duodenum-1__c92982 Dairy_cattle_Duodenum-3__c164021 Dairy_cattle_Duodenum-3__c172753 Dairy_cattle_Duodenum-3__c293305 Dairy_cattle_Duodenum-3__c296 Dairy_cattle_Duodenum-3__c671920 Dairy_cattle_Jejunum-1__c379987 Dairy_cattle_Jejunum-2__c109928 Dairy_cattle_Jejunum-2__c1315719 Dairy_cattle_Jejunum-2__c18031…
VC1357	5	50.14	501.4	2359	0.1747	0.952654	Sheep_Duodenum-1__c751 Yak_Jejunum-5__c369362 Dairy_cattle_Duodenum-3__c206798 Dairy_cattle_Duodenum-1__c387669 Dairy_cattle_Jejunum-1__c220892
VC1358	3	44.66	134	340.6	0.2788	0.33126	Dairy_cattle_Duodenum-2__c407388 Dairy_cattle_Duodenum-3__c107516 Sheep_Ileum-3__c191060
VC1359	33	33.52	17700	25500	0.4094	0.0007684	flye-goat_9111 2022NBT-84768 Goat_Rumen-1__c83516 Goat_Rumen-3__c151430 Goat_Rumen-5__c515644 Goat_Rumen-5__c706657 Goat_Rumen-5__c931309 Roe_deer_Abomasum-1__c115498 Roe_deer_Abomasum-5__c128519 Roe_deer_Reticulum-5__c142 Roe_deer_Rumen-1__c3699 Sheep_Rumen-1__c1270489 Water_buffalos_Omasum-1__c52323 Water_buffalos_Omasum-3__c62993 Water_buffalos_Rumen-1__c92965 Yak_Omasum-3__c510534 flye-goat_5…
VC1360	2	90.34	90.34	620.4	0.1264	0.979387	flye-goat_912 s8768.goat-hifiasm008925l
VC1361	16	41.15	4938	427.9	0.9148	7.72e-07	2022NBT-110639 2022NBT-110186 2022NBT-126475 2022NBT-83503 2022NBT-90613 Dairy_cattle_Duodenum-3__c190792 Dairy_cattle_Duodenum-3__c324045 Goat_Duodenum-3__c23707 Goat_Ileum-2__c169615 Goat_Ileum-2__c31 Roe_deer_Rumen-2__c187587 Roe_deer_Rumen-4__c183888 Water_buffalos_Cecum-3__c259817 Water_buffalos_Rumen-1__c20386 s14545.dairy-hifiasm014546l s82605.dairy-hifiasm082618c
VC1362	5	53.48	534.8	124.9	0.7986	0.00609289	2022NBT-81965 2022NBT-111830 Roe_deer_Jejunum-1__c114045 Sheep_Jejunum-4__c179146 Sheep_Rumen-5__c716
VC1363	7	139.2	2924	3646	0.4441	0.0799321	2022NBT-27023 2022NBT-23043_1 2022NBT-45524_1 2022NBT-47541 Goat_Cecum-2__c255985 Roe_deer_Cecum-3__c86477 Water_deer_Cecum-2__c150025
VC1364	2	141	141	608.6	0.1871	0.979387	2022NBT-52100 Roe_deer_Rectum-2__c235028
VC1365	19	166.9	28500	12400	0.6962	7.39e-08	Roe_deer_Rumen-3__c3487 Roe_deer_Omasum-3__c1189 Water_deer_Abomasum-1__c81203 Burkholderia~phage~BcepMu Burkholderia~phage~phiE255 Goat_Colon-1__c127705 Goat_Duodenum-3__c236292_1 Goat_Jejunum-3__c123384 Roe_deer_Cecum-4__c406702 Roe_deer_Rectum-5__c58122_1 Roe_deer_Rumen-3__c260_1 Roe_deer_Rumen-3__c330480_1 Sheep_Ileum-1__c171942_1 Water_buffalos_Cecum-4__c413954_1 Water_buffalos_Rectum-4__c60…
VC1366	12	20.83	1375	2032	0.4007	0.0202021	Roe_deer_Rumen-5__c235370 Roe_deer_Omasum-3__c7927 Sheep_Reticulum-3__c384831 Water_buffalos_Reticulum-3__c534259 Water_deer_Omasum-4__c159124 Water_buffalos_Rumen-3__c1342541 Water_deer_Omasum-1__c77553 Water_deer_Rectum-1__c141222 Water_deer_Reticulum-1__c29127 flye-dairy_9714 flye-dairy_9719 s43755.dairy-hifiasm043760l
VC1367	2	97.97	97.97	2289	0.04097	0.979387	2022NBT-74680 2022NBT-110460
VC1368	45	79.9	79100	19800	0.7993	0	Dairy_cattle_Duodenum-1__c218014 Dairy_cattle_Duodenum-1__c408934 Dairy_cattle_Duodenum-2__c423942 Dairy_cattle_Duodenum-3__c1089 Dairy_cattle_Duodenum-3__c2487 Dairy_cattle_Duodenum-3__c44769 Dairy_cattle_Duodenum-3__c736292 Dairy_cattle_Duodenum-3__c841 Dairy_cattle_Duodenum-3__c93233 Dairy_cattle_Duodenum-6__c92270 Dairy_cattle_Jejunum-1__c131417 Dairy_cattle_Jejunum-1__c205322 Dairy_cattle_Je…
VC1369	71	19.32	48000	27900	0.6314	0	Yak_Duodenum-1__c204029 Dairy_cattle_Abomasum-3__c30024 Dairy_cattle_Cecum-4__c372071 Dairy_cattle_Duodenum-1__c5719 Dairy_cattle_Duodenum-1__c636790 Dairy_cattle_Duodenum-1__c684 Dairy_cattle_Duodenum-1__c68565 Dairy_cattle_Duodenum-3__c170452 Dairy_cattle_Duodenum-3__c1842 Dairy_cattle_Duodenum-3__c313357 Dairy_cattle_Duodenum-3__c319406 Dairy_cattle_Duodenum-3__c373980 Dairy_cattle_Duodenum-3_…
VC1370	6	25.71	385.7	5047	0.07085	0.998474	Roe_deer_Jejunum-1__c15177 Roe_deer_Jejunum-1__c89352 Goat_Duodenum-1__c100730 Goat_Ileum-6__c113601 Sheep_Ileum-4__c23510 Water_deer_Cecum-4__c142368
VC1371	5	37.52	375.2	2365	0.1364	0.734565	Roe_deer_Omasum-4__c196768 Water_deer_Ileum-4__c44745 Sheep_Jejunum-3__c116598 Dairy_cattle_Duodenum-3__c681853 Sheep_Duodenum-3__c44950
VC1372	2	192.5	192.5	540.7	0.2611	0.979387	Water_deer_Rumen-5__c387 Water_deer_Abomasum-3__c125038
VC1373	6	61.73	926	6740	0.1206	0.998474	Water_deer_Rectum-4__c265728_1 2022NBT-337_1 2022NBT-32033_1 2022NBT-42670 Roe_deer_Rectum-2__c1363 Roe_deer_Rumen-5__c347552
VC1374	4	110.3	661.6	441.7	0.5954	0.0151914	Dairy_cattle_Duodenum-3__c161798 Dairy_cattle_Duodenum-3__c521122 Yak_Jejunum-5__c195519 Yak_Jejunum-5__c84712
VC1375	5	71.16	711.6	1008	0.4114	0.105038	2022NBT-460_1 2022NBT-73219 2022NBT-110_1 Roe_deer_Rectum-2__c45187 Water_deer_Cecum-3__c464035_1
VC1376	2	229.3	229.3	2700	0.07817	0.979387	2022NBT-1921_1 2022NBT-43676_1
VC1377	7	171.1	3593	7053	0.3371	0.449163	2022NBT-41273_1 Roe_deer_Rectum-3__c332747 Roe_deer_Rectum-4__c2685 Sheep_Rectum-2__c812522 Water_deer_Rectum-1__c295247 Water_deer_Rectum-1__c298 Water_deer_Rectum-4__c470
VC1378	70	48.96	118000	49300	0.7051	0	2022NBT-73242 Roe_deer_Rectum-2__c2233 Roe_deer_Rectum-2__c674195 Water_deer_Rectum-3__c338787 s22473.goat-hifiasm022738l 2022NBT-67492 Sheep_Rectum-2__c332219 2022NBT-51638 2022NBT-52741 2022NBT-58181 2022NBT-59976 2022NBT-65414 2022NBT-68383 2022NBT-85861 Dairy_cattle_Cecum-4__c784858 Dairy_cattle_Colon-4__c404340 Dairy_cattle_Duodenum-3__c490295 Dairy_cattle_Rectum-3__c323272 Dairy_cattle_Rect…
VC1379	6	58.31	874.7	1895	0.3144	0.810761	2022NBT-8696_1 Dairy_cattle_Cecum-2__c1144948 Dairy_cattle_Colon-4__c589007 Yak_Duodenum-3__c452218 Yak_Rumen-3__c1761320 s98819.dairy-hifiasm098837l
VC1380	2	280.5	280.5	2983	0.08583	0.979387	Dairy_cattle_Colon-5__c567 Yak_Cecum-1__c372528
VC1381	13	96.36	7516	6404	0.5389	8.25e-06	Water_deer_Rectum-1__c364750 Roe_deer_Colon-4__c5264 Dairy_cattle_Rectum-5__c397885 Roe_deer_Cecum-1__c2646 Roe_deer_Rectum-1__c1087 Roe_deer_Rectum-2__c2945 Roe_deer_Rectum-3__c315 Roe_deer_Rectum-4__c3569 Sheep_Rectum-2__c579810 Sheep_Rectum-3__c1234237 Sheep_Rectum-3__c430367 Water_buffalos_Colon-2__c317971 Yak_Rectum-3__c552815
VC1382	11	36.84	2026	8764	0.1874	0.989227	Dairy_cattle_Colon-3__c292812 Water_deer_Rectum-1__c413301 2022NBT-76125 2022NBT-82104 2022NBT-92735 Dairy_cattle_Cecum-3__c501838 Dairy_cattle_Colon-5__c718650 Roe_deer_Colon-1__c786439_1 Roe_deer_Colon-4__c109466 Roe_deer_Rectum-1__c547868 Water_deer_Cecum-2__c195198
VC1383	3	27.59	82.76	1245	0.06204	0.985452	Goat_Reticulum-2__c157738_1 Sheep_Omasum-2__c771761 Goat_Omasum-1__c516917_1
VC1384	5	9.934	99.34	420.2	0.1876	0.5	2022NBT-99846 s19244.dairy-hifiasm019246l s12265.dairy-hifiasm012266c flye-goat_9206 Goat_Rumen-5__c670900
VC1385	10	170	7648	6886	0.5255	0.00141364	2022NBT-27930 2022NBT-58558 2022NBT-60271 2022NBT-60616 2022NBT-62270 2022NBT-71108 Dairy_cattle_Colon-3__c621767 Water_buffalos_Colon-2__c244408 Water_deer_Rectum-1__c336677 Yak_Rectum-2__c396123
VC1386	30	70.69	30800	34800	0.4689	5.54e-07	Roe_deer_Cecum-1__c1218 2022NBT-1459_1 Goat_Abomasum-6__c176806_1 Goat_Ileum-3__c124742 Goat_Jejunum-2__c256216_1 Goat_Jejunum-3__c170302_1 Roe_deer_Colon-4__c2881 Roe_deer_Rectum-2__c504666_1 Roe_deer_Rectum-5__c245490_1 Sheep_Abomasum-1__c445172 Sheep_Omasum-4__c34346_1 Sheep_Reticulum-5__c447895 Sheep_Rumen-5__c235888 Water_deer_Rectum-1__c22398 s8171.goat-hifiasm008321l 2022NBT-1573_1 2022NBT…
VC1387	29	93.25	37900	17500	0.6828	0	Roe_deer_Rumen-5__c468047_1 s1115.goat-hifiasm001158l s2575.goat-hifiasm002653l_1 Goat_Rectum-5__c42651 Goat_Reticulum-2__c441819 Goat_Rumen-1__c803235 Goat_Rumen-2__c635888 Roe_deer_Cecum-5__c4598 Roe_deer_Jejunum-1__c44939 Roe_deer_Jejunum-3__c111093 Roe_deer_Rumen-3__c2325 Roe_deer_Rumen-5__c3839 Roe_deer_Rumen-5__c564640 Sheep_Omasum-4__c256760 Sheep_Reticulum-3__c567693 Water_buffalos_Jejunu…
VC1388	8	144.9	4058	24400	0.1426	0.999679	Goat_Rumen-3__c285 flye-goat_12787 flye-goat_2715_1 s3448.goat-hifiasm003544l_2 flye-goat_9856_1 s33338.goat-hifiasm033691l s417.goat-hifiasm000432l_1 s6981.goat-hifiasm007117l
VC1389	11	37.12	2042	12300	0.1425	0.998436	flye-goat_8388 flye-goat_8387 flye-goat_8176 Goat_Jejunum-2__c218026 s15269.goat-hifiasm015482l s6981.goat-hifiasm007117l flye-goat_19870 flye-goat_12165 s3215.goat-hifiasm003310l flye-goat_4093 s1642.goat-hifiasm001699l
VC1390	35	52.6	31300	14700	0.6794	0	2022NBT-61270 2022NBT-61651 2022NBT-35613 2022NBT-4805_1 Roe_deer_Rumen-5__c466455 Water_deer_Colon-4__c216454 2022NBT-58230 2022NBT-62965 Roe_deer_Cecum-4__c407430 2022NBT-43523_1 Goat_Reticulum-4__c289657 Roe_deer_Rumen-2__c4385 2022NBT-4857_1 2022NBT-58166 2022NBT-63206 Goat_Ileum-2__c100978 Goat_Jejunum-2__c72863 Goat_Jejunum-2__c80027 Goat_Rumen-4__c879434 Goat_Rumen-6__c363843 Roe_deer_Abom…
VC1391	14	231	21000	22300	0.4846	0.000184761	2022NBT-13844 2022NBT-22141_1 2022NBT-23506 2022NBT-23769 2022NBT-2505_1 2022NBT-27068_1 2022NBT-33734 2022NBT-37825 2022NBT-53476 2022NBT-723_1 Dairy_cattle_Colon-5__c690353 Roe_deer_Rectum-4__c382 Water_deer_Rectum-4__c191747 2022NBT-26123
VC1392	38	116.5	81900	84100	0.4931	0	Goat_Cecum-6__c502572 2022NBT-3313_2 2022NBT-13418_1 2022NBT-33431_1 2022NBT-42600_1 Dairy_cattle_Rumen-3__c319_1 Goat_Cecum-1__c1522_1 Goat_Cecum-3__c27_1 Goat_Cecum-3__c513945 Goat_Cecum-4__c908298_1 Goat_Colon-6__c427040 Goat_Colon-6__c711957 Goat_Omasum-2__c274270_1 Goat_Reticulum-2__c446459_1 Goat_Rumen-5__c367193 Roe_deer_Cecum-3__c511_1 Roe_deer_Cecum-3__c78165 Roe_deer_Cecum-5__c2058_1 Ro…
VC1393	2	20.96	20.96	230.3	0.08212	0.979387	Goat_Colon-5__c77977 flye-dairy_4545
VC1394	3	51.74	155.2	567.2	0.2131	0.904785	Goat_Rumen-4__c487665 Sheep_Rumen-5__c1653650 s25678.dairy-hifiasm025680l
VC1395	14	69.31	6307	13000	0.3269	0.210674	Goat_Rumen-5__c225761 Roe_deer_Omasum-2__c708 Roe_deer_Reticulum-4__c1059 Roe_deer_Reticulum-4__c1251 Water_buffalos_Abomasum-1__c319914 Water_deer_Abomasum-3__c38 Water_deer_Reticulum-5__c81457 flye-dairy_32388 flye-dairy_9488 s13871.dairy-hifiasm013872l s25651.dairy-hifiasm025653l flye-dairy_1707 flye-dairy_3675 s55993.dairy-hifiasm055998l
VC1396	4	326.8	1961	4394	0.3082	0.557383	Roe_deer_Cecum-3__c1407 Roe_deer_Colon-1__c385691 Roe_deer_Colon-2__c1003 Water_buffalos_Colon-1__c558584
VC1397	2	136.7	136.7	2406	0.05366	0.979387	Roe_deer_Reticulum-2__c1980 Water_deer_Reticulum-2__c201619
VC1398	3	55.49	166.5	2646	0.05906	0.808633	flye-dairy_10723 flye-dairy_4545 flye-dairy_9623
VC1399	2	317.2	317.2	7274	0.04176	0.979387	Sheep_Omasum-3__c447198 s36820.dairy-hifiasm036824l
VC1400	2	32.37	32.37	311.2	0.09315	0.979387	flye-dairy_21941 flye-dairy_4544
VC1401	3	67.04	201.1	428.1	0.3166	0.33126	s49722.dairy-hifiasm049727l Roe_deer_Rumen-2__c356599 Yak_Rumen-5__c1078227
VC1402	2	66.43	66.43	368.9	0.1512	0.658454	Water_deer_Abomasum-1__c105933 s8611.dairy-hifiasm008612l
VC1403	10	101.5	4569	40100	0.1022	0.999616	flye-dairy_33590 Roe_deer_Rumen-3__c221682 flye-dairy_2604 Water_deer_Reticulum-5__c114 Roe_deer_Abomasum-5__c675 Water_deer_Abomasum-1__c45 Water_deer_Abomasum-2__c280 s1164.goat-hifiasm001209l s6481.goat-hifiasm006613l Water_deer_Reticulum-4__c220783
VC1404	3	512.6	1538	6802	0.1843	0.808633	2022NBT-13953 2022NBT-723_1 Water_buffalos_Cecum-4__c484298
VC1405	4	292	1752	4735	0.2698	0.557383	2022NBT-31616 2022NBT-39700 2022NBT-46706 Water_deer_Rectum-1__c149570_1
VC1406	7	110.5	2320	3418	0.4033	0.100668	Goat_Rumen-5__c901910 s48095.dairy-hifiasm048100l flye-dairy_19109 flye-dairy_46008 s27234.dairy-hifiasm027236l s57746.dairy-hifiasm057752l s75686.dairy-hifiasm075698l
VC1407	2	236	236	2394	0.0896	0.979387	Goat_Rumen-5__c901910 s48095.dairy-hifiasm048100l
VC1408	4	4.303	25.82	697.4	0.03531	0.992931	flye-goat_2418 Roe_deer_Abomasum-1__c250756 s13339.goat-hifiasm013540l flye-goat_214
VC1409	2	18.18	18.18	31.5	0.3387	0.658454	2022NBT-122577 flye-goat_13542
VC1410	18	63.44	9706	3746	0.7196	1.61e-07	2022NBT-95893 Dairy_cattle_Colon-4__c834126 Goat_Omasum-5__c186627 Goat_Abomasum-5__c397048 Sheep_Ileum-3__c220 Water_deer_Ileum-3__c48607 Dairy_cattle_Reticulum-6__c603581 Goat_Abomasum-3__c687 Roe_deer_Abomasum-1__c1244 Roe_deer_Abomasum-1__c128321 Roe_deer_Omasum-4__c118489 Sheep_Abomasum-4__c249589 Sheep_Abomasum-5__c12696 Sheep_Jejunum-1__c545 Sheep_Omasum-1__c478522 Sheep_Omasum-5__c2590 Wa…
VC1411	24	37.43	10300	2233	0.8191	1.55e-09	Goat_Ileum-2__c107300 Dairy_cattle_Duodenum-3__c836808 Goat_Duodenum-1__c182977 Goat_Jejunum-3__c246004 Roe_deer_Abomasum-1__c43670 Roe_deer_Jejunum-2__c134491 Roe_deer_Jejunum-2__c70278 Sheep_Abomasum-5__c369756 Sheep_Duodenum-3__c228695 Sheep_Ileum-4__c60027 Sheep_Omasum-3__c362181 Sheep_Omasum-5__c682296 Sheep_Reticulum-1__c651995 Sheep_Reticulum-5__c927315 Sheep_Rumen-3__c793249 Sheep_Rumen-5…
VC1412	35	66.74	39700	22600	0.6367	0	flye-dairy_70220 2022NBT-66237 2022NBT-67725 2022NBT-68805 2022NBT-68952 2022NBT-69763 Sheep_Cecum-3__c266303 Sheep_Colon-3__c761410 2022NBT-73687 Roe_deer_Colon-4__c437941 2022NBT-66686 2022NBT-70064 2022NBT-74473 Dairy_cattle_Jejunum-6__c341 s7656.dairy-hifiasm007657l flye-dairy_76038 Water_deer_Omasum-4__c34037_1 s79004.dairy-hifiasm079017l Sheep_Abomasum-2__c127624 Sheep_Jejunum-2__c365600_1 …
VC1413	16	57.45	6894	8775	0.4391	0.000724487	Water_deer_Rumen-2__c17801 2022NBT-69181 Goat_Omasum-1__c462108_1 2022NBT-72096 Roe_deer_Rectum-1__c234168 Roe_deer_Rumen-5__c1446 Sheep_Ileum-5__c55157 Water_deer_Omasum-2__c11437_1 Water_deer_Rumen-2__c113506_1 Yak_Cecum-4__c36546 Yak_Cecum-4__c366861 flye-dairy_79368 flye-dairy_81283 flye-goat_7695_1 s32133.dairy-hifiasm032136l_1 Roe_deer_Rumen-5__c360628
VC1414	7	86.38	1814	3616	0.3332	0.69536	2022NBT-57618 flye-dairy_80558 Water_buffalos_Cecum-2__c895159 Water_buffalos_Rectum-5__c136321 Goat_Duodenum-3__c161687 s20803.dairy-hifiasm020805l s84711.dairy-hifiasm084725l
VC1415	39	93.65	69400	21900	0.7599	0	Yak_Rectum-1__c959838 Dairy_cattle_Colon-5__c520403 Roe_deer_Cecum-1__c634554 Roe_deer_Cecum-5__c4574 Water_deer_Cecum-2__c251124 Water_deer_Rectum-1__c153640 flye-dairy_80293 Water_deer_Colon-2__c503234 2022NBT-44887 2022NBT-43783 Dairy_cattle_Duodenum-3__c241130 Roe_deer_Jejunum-3__c955 Roe_deer_Rumen-5__c2947 Sheep_Rectum-1__c289023 Water_buffalos_Colon-1__c278856 Water_buffalos_Rectum-2__c718…
VC1416	119	64.5	453000	233000	0.66	0	2022NBT-30161 2022NBT-31721 2022NBT-47807 2022NBT-63966 2022NBT-67785 2022NBT-69614 Dairy_cattle_Duodenum-3__c300072 Dairy_cattle_Duodenum-3__c330831 Dairy_cattle_Jejunum-1__c522352 Dairy_cattle_Rumen-6__c1438062 Goat_Duodenum-3__c71156 Goat_Jejunum-3__c303769 Goat_Rumen-3__c526160 Roe_deer_Cecum-1__c1872 Roe_deer_Cecum-3__c1083 Roe_deer_Colon-5__c1277 Roe_deer_Rectum-4__c548882 Roe_deer_Rumen-3_…
VC1417	40	107.6	84000	56900	0.5956	0	Dairy_cattle_Duodenum-3__c838130 Dairy_cattle_Jejunum-1__c215480 Dairy_cattle_Jejunum-2__c291281 Sheep_Jejunum-1__c371 Dairy_cattle_Cecum-4__c674215 Dairy_cattle_Jejunum-1__c655117 Dairy_cattle_Duodenum-1__c238271_1 Dairy_cattle_Duodenum-3__c174438 Dairy_cattle_Duodenum-3__c334816 Dairy_cattle_Duodenum-3__c684014_1 Dairy_cattle_Duodenum-3__c782609 Dairy_cattle_Jejunum-2__c135352 Dairy_cattle_Jeju…
VC1418	64	74.79	151000	39200	0.7931	0	Roe_deer_Jejunum-2__c118 s16550.goat-hifiasm016771l 2022NBT-79368 2022NBT-69855 Goat_Duodenum-1__c456867 Goat_Jejunum-1__c125597 flye-dairy_59100 Goat_Jejunum-3__c41510_1 Yak_Rectum-1__c332919 Dairy_cattle_Jejunum-1__c590176 Sheep_Duodenum-4__c21830 Sheep_Jejunum-2__c319970 Sheep_Rumen-3__c812956 flye-dairy_28452 Dairy_cattle_Cecum-4__c608046 Dairy_cattle_Colon-5__c935433 Dairy_cattle_Duodenum-1_…
VC1419	4	113.4	680.6	691.8	0.493	0.0561756	Water_buffalos_Rectum-5__c460538 2022NBT-20407_2 2022NBT-81261 Water_buffalos_Cecum-4__c298270
VC1420	8	93.92	2630	7233	0.2662	0.999679	flye-dairy_71375 Roe_deer_Cecum-1__c2193 Roe_deer_Cecum-4__c238291 Roe_deer_Cecum-5__c551013 Roe_deer_Rumen-5__c14138 Water_buffalos_Cecum-1__c238807 flye-dairy_66069 s1165.dairy-hifiasm001166l
VC1421	16	75.92	9111	41700	0.1794	0.998936	2022NBT-58704 Goat_Reticulum-3__c42842 Roe_deer_Rectum-4__c1624_1 Water_deer_Colon-4__c43183_1 Yak_Duodenum-3__c13635 Yak_Duodenum-3__c298618 Yak_Duodenum-3__c318249 flye-dairy_71386 flye-dairy_79650 flye-goat_21304 flye-goat_2729_1 s12353.goat-hifiasm012541c s34131.dairy-hifiasm034135c s4027.dairy-hifiasm004028l s5517.goat-hifiasm005637l 2022NBT-33458_1
VC1422	7	133.7	2807	27000	0.0943	0.989275	flye-dairy_47902 flye-dairy_50310 flye-dairy_71379 flye-dairy_77818 flye-dairy_78885 flye-dairy_79992 flye-dairy_47900
VC1423	32	36.82	18300	51400	0.2619	0.502678	2022NBT-65847 Water_buffalos_Rectum-5__c487116 Water_deer_Rumen-2__c17801 s7290.dairy-hifiasm007291l 2022NBT-69181 Roe_deer_Rumen-5__c4980 Sheep_Rumen-1__c33736 Sheep_Rumen-5__c1254782 contig_192072 flye-dairy_33778 flye-dairy_33780 flye-dairy_79525 flye-dairy_80985 flye-goat_21327 s72516.dairy-hifiasm072527l Goat_Omasum-1__c462108_1 2022NBT-72096 Roe_deer_Rectum-1__c234168 Roe_deer_Rumen-5__c144…
VC1424	4	116.8	700.9	5301	0.1166	0.992931	flye-goat_21277 Sheep_Jejunum-2__c172219_1 Sheep_Ileum-5__c26947 Sheep_Jejunum-5__c394
VC1425	10	245.2	11000	6008	0.6467	9.13e-05	Goat_Rumen-1__c223147_1 Sheep_Colon-5__c452047 Sheep_Rumen-3__c796571_1 Sheep_Rumen-4__c1096415 Yak_Abomasum-5__c524070 Yak_Omasum-2__c513981 Yak_Omasum-5__c422107 Yak_Rumen-5__c538889 flye-dairy_81220 s48526.dairy-hifiasm048531l
VC1426	5	13.04	130.4	40.08	0.7226	0.00609289	Parabacteroides~phage~YZ-2015b Parabacteroides~phage~YZ-2015a Goat_Rumen-5__c303521 Yak_Jejunum-5__c316084 Yak_Jejunum-5__c319912
VC1427	3	156.9	470.8	294.2	0.6107	0.0360991	2022NBT-111949 Sheep_Cecum-1__c749668 Yak_Jejunum-5__c341756
VC1428	2	199.2	199.2	60.49	0.7554	0.110336	Arthrobacter~phage~Anjali Arthrobacter~phage~Mendel
VC1429	2	189	189	175.2	0.5134	0.0969654	Bifidobacterium~phage~BadAargau2 Bifidobacterium~phage~BadAztec1
VC1430	2	592.3	592.3	898.5	0.3962	0.658454	Sheep_Rectum-1__c148541 Roe_deer_Cecum-2__c1361
VC1431	2	54.94	54.94	1629	0.03254	0.979387	Water_deer_Reticulum-2__c334308 s43621.goat-hifiasm044075l
VC1432	52	41.38	54900	69700	0.44	1.04e-07	2022NBT-1375_2 Dairy_cattle_Reticulum-5__c1316632 Roe_deer_Rumen-5__c420035 Water_deer_Abomasum-4__c34306 Water_deer_Abomasum-5__c67883 contig_135552 contig_77861 flye-dairy_80251 2022NBT-80639 Dairy_cattle_Duodenum-3__c842132 Dairy_cattle_Jejunum-1__c180212 Dairy_cattle_Reticulum-2__c41 Goat_Ileum-6__c193971 Goat_Omasum-1__c455769_1 Goat_Omasum-1__c588416_1 Goat_Omasum-1__c723805 Goat_Omasum-6__…
VC1433	6	164.9	2474	2826	0.4657	0.0867427	2022NBT-28564 2022NBT-29271_1 2022NBT-30658 2022NBT-45289 2022NBT-14463_1 2022NBT-40684
VC1434	2	168.1	168.1	4210	0.03836	0.979387	2022NBT-48782 2022NBT-59291
VC1435	4	46.54	279.2	1670	0.1426	0.992931	2022NBT-50237_1 Dairy_cattle_Cecum-4__c781133 Dairy_cattle_Reticulum-6__c1004804 Water_buffalos_Rumen-3__c845741
VC1436	7	136.9	2876	563.4	0.8328	0.00108251	Water_buffalos_Rumen-3__c545366 Yak_Jejunum-5__c23258 Yak_Rectum-5__c455127 flye-dairy_17129 s25618.dairy-hifiasm025620l s53400.dairy-hifiasm053405l s62046.dairy-hifiasm062052l
VC1437	34	39.79	22300	56400	0.2833	0.703174	2022NBT-65109 Dairy_cattle_Rumen-4__c340371 Roe_deer_Reticulum-2__c1490 Water_deer_Reticulum-2__c253157 flye-dairy_45591_1 flye-dairy_59332 flye-goat_21394 s90665.dairy-hifiasm090680l 2022NBT-31450_1 2022NBT-59318 Roe_deer_Cecum-5__c343153 Roe_deer_Cecum-5__c7481 Roe_deer_Colon-5__c614 Roe_deer_Rectum-2__c2016 Roe_deer_Rectum-5__c255868 Roe_deer_Reticulum-5__c141734_1 Water_deer_Rumen-3__c172907 …
VC1438	10	146.8	6608	10200	0.3926	0.0320111	2022NBT-67132 2022NBT-68816 2022NBT-71022 2022NBT-68706 2022NBT-79796 2022NBT-60950 2022NBT-67272 2022NBT-82054 Dairy_cattle_Jejunum-6__c26502 Roe_deer_Abomasum-5__c378
VC1439	18	35.89	5491	7234	0.4303	0.00125768	2022NBT-19066_1 Goat_Cecum-2__c375288_1 Goat_Reticulum-2__c91847_1 Roe_deer_Rectum-3__c1011_1 2022NBT-14074_1 2022NBT-22055 2022NBT-22106 2022NBT-49321_1 2022NBT-49820 2022NBT-57477 Roe_deer_Cecum-1__c120575 Sheep_Rectum-1__c89453 Water_buffalos_Colon-5__c203646 Yak_Rectum-1__c681248 Yak_Rectum-1__c976426 Yak_Rectum-4__c507197 Yak_Rectum-5__c147481 Yak_Rectum-5__c298638
VC1440	4	189.6	1137	2842	0.2852	0.667497	Streptococcus~phage~315.6 Streptococcus~phage~315.4 Temperate~phage~phiNIH1.1 Streptococcus~phage~P9
VC1441	33	62.22	32900	20300	0.6168	0	Dairy_cattle_Duodenum-3__c111162 s52661.dairy-hifiasm052666l s66533.dairy-hifiasm066542l flye-dairy_47723 s5946.dairy-hifiasm005947l Dairy_cattle_Duodenum-1__c391471 Goat_Duodenum-3__c98600 Goat_Rectum-2__c177613 Goat_Rumen-5__c665112 Roe_deer_Colon-4__c1721 Water_deer_Reticulum-3__c343954 Yak_Cecum-2__c619658 Yak_Jejunum-5__c341597 contig_168377 contig_33800 contig_34745 flye-dairy_31176 flye-da…
VC1442	64	70.17	142000	102000	0.5815	0	Dairy_cattle_Duodenum-3__c259466 Dairy_cattle_Omasum-3__c715858 Sheep_Duodenum-5__c92562 Sheep_Jejunum-3__c126945 Dairy_cattle_Colon-4__c826034 s39730.dairy-hifiasm039735l 2022NBT-29774 2022NBT-70557 Dairy_cattle_Cecum-3__c745097 Dairy_cattle_Duodenum-1__c1540 Dairy_cattle_Duodenum-1__c191508 Dairy_cattle_Duodenum-1__c238229 Dairy_cattle_Duodenum-3__c142532 Dairy_cattle_Duodenum-3__c658130 Dairy_…
VC1443	50	64.68	79200	40400	0.6617	0	flye-dairy_24610 Dairy_cattle_Jejunum-1__c109 Dairy_cattle_Jejunum-6__c98537 Dairy_cattle_Rectum-3__c289226 dairy-scaffold_24607 flye-dairy_14378 flye-dairy_42510 flye-dairy_57312 flye-dairy_58560 flye-dairy_64514 flye-dairy_77488 flye-dairy_78348 Dairy_cattle_Duodenum-1__c364885 Dairy_cattle_Jejunum-6__c113 flye-dairy_66495 Dairy_cattle_Cecum-3__c337581 Dairy_cattle_Colon-3__c885214 Dairy_cattle…
VC1444	40	35.21	27500	36800	0.427	0.00275083	2022NBT-20521_1 Goat_Cecum-3__c883648 2022NBT-75667 Sheep_Rectum-1__c582685 2022NBT-80639 Dairy_cattle_Duodenum-3__c842132 Dairy_cattle_Reticulum-2__c41 Goat_Ileum-6__c193971 Goat_Omasum-1__c723805 Goat_Omasum-6__c231084 Roe_deer_Rumen-1__c3900 Sheep_Rumen-2__c1306178 Water_buffalos_Abomasum-1__c408844_1 Water_buffalos_Rumen-4__c1630462 Yak_Jejunum-5__c113850 Yak_Jejunum-5__c180959 Yak_Jejunum-5_…
VC1445	146	63.2	669000	105000	0.8642	0	Dairy_cattle_Rumen-1__c731085 Water_buffalos_Omasum-4__c400989 Yak_Duodenum-1__c277940 s4651.dairy-hifiasm004652l Dairy_cattle_Duodenum-3__c448022 Goat_Ileum-1__c123473 Goat_Jejunum-2__c710_1 Yak_Colon-2__c817293 Yak_Rumen-4__c581572 flye-dairy_79369 Sheep_Duodenum-2__c488 Sheep_Duodenum-5__c164969 Sheep_Rumen-4__c467700 Roe_deer_Jejunum-3__c310 Roe_deer_Abomasum-4__c1485 Dairy_cattle_Duodenum-3_…
VC1446	2	61.76	61.76	504.3	0.1083	0.979387	2022NBT-78473 Roe_deer_Rectum-3__c604506
VC1447	61	95.05	174000	237000	0.423	2.27e-08	Goat_Cecum-4__c857096_1 Water_deer_Rectum-2__c52423_1 Water_buffalos_Cecum-4__c505147 Water_deer_Colon-1__c250497 Water_deer_Colon-4__c198129_1 2022NBT-919_1 Roe_deer_Jejunum-1__c585_1 2022NBT-5956_1 2022NBT-57949 2022NBT-34593 2022NBT-38545_1 2022NBT-42186 2022NBT-53924 2022NBT-54032 Roe_deer_Cecum-1__c151483 Roe_deer_Cecum-3__c1736 Roe_deer_Omasum-5__c2544 Sheep_Rectum-3__c44099 Water_deer_Colo…
VC1448	40	103.2	80500	28800	0.7362	0	Water_buffalos_Rectum-5__c782837 2022NBT-65591 2022NBT-947_1 Dairy_cattle_Cecum-4__c672149 Goat_Rectum-5__c341398 Roe_deer_Cecum-1__c1627 Roe_deer_Cecum-2__c513101 Roe_deer_Cecum-5__c239367 Roe_deer_Cecum-5__c2492 Roe_deer_Rectum-1__c242605 Roe_deer_Rectum-1__c262 Roe_deer_Rectum-2__c1910 Water_buffalos_Colon-5__c539459 Water_buffalos_Rectum-3__c286685 Water_buffalos_Rectum-4__c193571 Water_buffa…
VC1449	34	168.4	94500	105000	0.4747	1.01e-08	Goat_Rumen-2__c66296 Goat_Jejunum-1__c200280 Roe_deer_Jejunum-1__c163218 Sheep_Abomasum-1__c102126 Sheep_Duodenum-2__c111_1 Sheep_Rumen-2__c1392943 Yak_Rumen-5__c1346795 flye-dairy_81020 s26307.dairy-hifiasm026309l Goat_Rumen-2__c96676 s2156.goat-hifiasm002229l_1 Goat_Abomasum-2__c561461 Sheep_Omasum-1__c852173 Sheep_Omasum-2__c396622 Goat_Reticulum-4__c331378 Sheep_Rumen-1__c506 flye-goat_20072 …
VC1450	4	181.4	1089	13200	0.0763	0.992931	Paenibacillus~phage~Dragolir Paenibacillus~phage~Vegas Paenibacillus~phage~Harrison Paenibacillus~phage~Wanderer
VC1451	63	71.73	140000	48800	0.7412	0	Roe_deer_Abomasum-4__c153 Sheep_Jejunum-2__c268342 Yak_Cecum-2__c124223 Water_buffalos_Colon-1__c96018 s88436.dairy-hifiasm088451l Yak_Duodenum-1__c68476 Dairy_cattle_Jejunum-2__c1238 Goat_Ileum-6__c151115 flye-dairy_78101 s27189.dairy-hifiasm027191c s36929.dairy-hifiasm036933l s55088.dairy-hifiasm055093l s69520.dairy-hifiasm069531l Dairy_cattle_Duodenum-1__c145936 Dairy_cattle_Jejunum-6__c39095 …
VC1452	5	101.2	1012	8168	0.1101	0.996692	Roe_deer_Cecum-5__c2623_1 Roe_deer_Rectum-5__c298350_1 Roe_deer_Cecum-4__c203 Roe_deer_Cecum-4__c80233 Roe_deer_Rectum-3__c10896
VC1453	4	121.3	727.5	1804	0.2865	0.969699	Roe_deer_Omasum-2__c1813 flye-dairy_11648 flye-dairy_55622 s63488.dairy-hifiasm063494l
VC1454	2	58.3	58.3	828.9	0.06542	0.979387	2022NBT-1822_1 Roe_deer_Rectum-4__c83153
VC1455	4	147.3	884	10400	0.07829	0.992931	Roe_deer_Rumen-1__c7983_1 Water_buffalos_Rumen-1__c313307 Roe_deer_Rumen-5__c218504 Water_buffalos_Rumen-3__c677211_1
VC1456	16	49.43	5932	19400	0.2338	0.998455	contig_157093 Dairy_cattle_Jejunum-6__c103974 Goat_Omasum-1__c588416_1 Goat_Rumen-4__c1707 Roe_deer_Omasum-5__c53_1 Yak_Duodenum-1__c10658 Yak_Duodenum-1__c368741 Yak_Jejunum-5__c256573 Yak_Rumen-2__c271543 flye-dairy_57975 flye-dairy_60458 flye-dairy_67800 flye-dairy_80553 contig_63888 s54498.dairy-hifiasm054503l s24097.dairy-hifiasm024099l
VC1457	79	56.67	175000	155000	0.5295	0	Sheep_Duodenum-2__c166628 flye-dairy_28964 flye-dairy_52715 flye-dairy_59823 flye-dairy_64938 s94232.dairy-hifiasm094247l flye-dairy_57479 2022NBT-71473 Roe_deer_Omasum-2__c338165 Yak_Duodenum-1__c8482 Yak_Rumen-2__c273858 flye-dairy_57551 s52481.dairy-hifiasm052486l 2022NBT-53574 Dairy_cattle_Cecum-4__c1002323 Dairy_cattle_Duodenum-1__c423 Dairy_cattle_Duodenum-3__c112908 Dairy_cattle_Duodenum-3…
VC1458	15	121.5	12800	18500	0.4075	0.0035081	Sheep_Duodenum-2__c37030 Dairy_cattle_Duodenum-1__c336788 Sheep_Omasum-2__c57378 Water_buffalos_Jejunum-5__c68615 Yak_Jejunum-5__c67669 Yak_Reticulum-1__c1534 Yak_Rumen-2__c1224562 Yak_Rumen-2__c1876759 Yak_Rumen-2__c679556 Yak_Rumen-4__c157135 Yak_Rumen-5__c984917 flye-dairy_75404 flye-dairy_75867 flye-dairy_79197 s50370.dairy-hifiasm050375l
VC1459	9	84.67	3048	10700	0.2216	0.998216	2022NBT-75767 2022NBT-78842 2022NBT-81686 Sheep_Duodenum-2__c135573 Sheep_Ileum-1__c174146 Sheep_Ileum-1__c251328 Sheep_Omasum-1__c487678 Water_deer_Ileum-3__c36084 flye-dairy_59703
VC1460	48	95.67	108000	27600	0.796	0	Sheep_Duodenum-4__c106349 Sheep_Ileum-2__c92049 contig_99791 2022NBT-57810 Yak_Jejunum-5__c135919 2022NBT-55457 2022NBT-50575 2022NBT-57030 2022NBT-70037 2022NBT-71397 Dairy_cattle_Colon-6__c185495 Dairy_cattle_Duodenum-1__c121 Dairy_cattle_Duodenum-1__c134 Dairy_cattle_Duodenum-1__c472490 Dairy_cattle_Duodenum-3__c361680 Dairy_cattle_Duodenum-3__c58012_1 Dairy_cattle_Duodenum-5__c452864 Dairy_ca…
VC1461	4	146.7	880.1	4033	0.1788	0.943824	Sheep_Duodenum-2__c135573 Sheep_Jejunum-2__c921 Sheep_Reticulum-1__c158 flye-dairy_32936
VC1462	14	180.5	16400	27200	0.3765	0.0347671	Sheep_Rumen-1__c582 2022NBT-67336 Goat_Abomasum-1__c244564 Goat_Cecum-3__c179467 Goat_Colon-6__c916792 Roe_deer_Cecum-2__c217864 Roe_deer_Omasum-3__c1880 Roe_deer_Rumen-5__c1419 Sheep_Abomasum-1__c114 Sheep_Cecum-2__c187_1 Sheep_Rumen-2__c1263459 Water_deer_Rectum-4__c3283 flye-dairy_59528 Water_deer_Rectum-1__c327275
VC1463	4	256.6	1540	3338	0.3151	0.843839	2022NBT-23328_1 2022NBT-3653_1 2022NBT-470_1 Sheep_Rectum-3__c1143854
VC1464	14	99.64	9067	14500	0.3837	0.0347671	2022NBT-67132 2022NBT-68816 2022NBT-71022 s71326.dairy-hifiasm071337l 2022NBT-68706 2022NBT-79796 Roe_deer_Jejunum-2__c452 s78356.dairy-hifiasm078369l 2022NBT-60950 2022NBT-67272 2022NBT-82054 Dairy_cattle_Jejunum-6__c26502 Roe_deer_Abomasum-5__c378 flye-dairy_76475
VC1465	6	153.5	2302	3247	0.414	0.0867427	flye-dairy_77956 flye-dairy_77324 contig_10556 contig_142276 flye-dairy_79512 flye-dairy_80717
VC1466	2	244.2	244.2	1502	0.1395	0.979387	Water_deer_Cecum-4__c230622 Water_deer_Rectum-4__c186487
VC1467	13	98.82	7708	13800	0.3588	0.205962	flye-dairy_36418 flye-dairy_31295 flye-dairy_40113 flye-dairy_43379 flye-dairy_60861 flye-dairy_36415 flye-dairy_57902 flye-dairy_57432 flye-dairy_36413 flye-dairy_38390 s22132.dairy-hifiasm022134l s90233.dairy-hifiasm090248l s97945.dairy-hifiasm097963l
VC1468	12	117.5	7757	16600	0.3184	0.488485	flye-dairy_70153 flye-dairy_60458 flye-dairy_54095 Dairy_cattle_Rumen-1__c1511111 Yak_Rumen-1__c2520616 flye-dairy_54093 flye-dairy_62581 flye-dairy_66700 flye-dairy_48870 flye-dairy_77975 s24097.dairy-hifiasm024099l flye-dairy_54096
VC1469	88	46.09	176000	103000	0.6312	0	contig_39844 contig_152478 flye-dairy_13535 contig_120960 flye-dairy_14713 flye-dairy_23864 flye-dairy_29197 flye-dairy_29199 flye-dairy_29200 flye-dairy_29203 flye-dairy_44309 flye-dairy_55096 flye-dairy_61575 flye-dairy_69778 flye-dairy_70890 s19353.dairy-hifiasm019355l s26800.dairy-hifiasm026802l s75035.dairy-hifiasm075046l s75537.dairy-hifiasm075549l s76602.dairy-hifiasm076614l s82160.dairy-h…
VC1470	13	87.8	6849	12000	0.3626	0.177984	contig_10788 contig_186257 flye-dairy_51458 Goat_Rumen-3__c876168_1 s71506.dairy-hifiasm071517l flye-dairy_32754 contig_10787 flye-dairy_28991 s51643.dairy-hifiasm051648l flye-dairy_54814 flye-dairy_65333 s17235.dairy-hifiasm017236l s7729.goat-hifiasm007878l_1
VC1471	11	170.2	9362	22100	0.297	0.853288	Dairy_cattle_Jejunum-1__c70750 flye-dairy_68729 flye-dairy_63266 flye-dairy_69688 flye-dairy_71389 flye-dairy_44489 flye-dairy_56366 flye-dairy_67679 s15890.dairy-hifiasm015891l s54370.dairy-hifiasm054375l s69765.dairy-hifiasm069776l
VC1472	5	87.09	870.9	7332	0.106	0.996692	contig_34800 s91070.dairy-hifiasm091085l s94556.dairy-hifiasm094572l flye-dairy_61172 flye-dairy_10886
VC1473	41	42.76	35100	33600	0.5099	2.11e-06	2022NBT-34084 Goat_Abomasum-1__c410012 Water_buffalos_Rectum-1__c317308 contig_112042 2022NBT-67083_1 Sheep_Abomasum-4__c167325 Goat_Jejunum-2__c113604 Sheep_Rumen-4__c616 2022NBT-63098 Sheep_Abomasum-4__c246331 2022NBT-87997 Erysipelothrix~phage~SE-1 Goat_Jejunum-2__c176667_1 Goat_Jejunum-3__c286145 Roe_deer_Jejunum-3__c1599 Roe_deer_Reticulum-2__c1653 Roe_deer_Rumen-4__c256789 Sheep_Ileum-5__c1…
VC1474	17	163.9	22300	15600	0.5874	3.77e-06	flye-dairy_30105 Dairy_cattle_Duodenum-2__c204321 Dairy_cattle_Duodenum-3__c218920 flye-dairy_27028 flye-dairy_33972 flye-dairy_46419 flye-dairy_51327 flye-dairy_68099 Dairy_cattle_Jejunum-1__c322 flye-dairy_32161 flye-dairy_32162 flye-dairy_32163 flye-dairy_50777 flye-dairy_59957 flye-dairy_61740 flye-dairy_74347 s20121.dairy-hifiasm020123l
VC1475	18	97.43	14900	10600	0.5848	9.6e-07	Goat_Abomasum-3__c28359_1 Sheep_Omasum-3__c739163_1 Sheep_Rumen-1__c1079139_1 Water_buffalos_Jejunum-5__c109 Yak_Duodenum-1__c45 flye-dairy_68555 Yak_Abomasum-1__c285327 Dairy_cattle_Rumen-5__c222089 flye-dairy_30508 Dairy_cattle_Reticulum-4__c568731 Water_buffalos_Cecum-5__c81092 Yak_Jejunum-5__c255578 Yak_Rumen-2__c1278516 Dairy_cattle_Duodenum-3__c39891 Yak_Duodenum-1__c102538 Yak_Rumen-4__c70…
VC1476	3	179.8	539.3	567	0.4849	0.0404278	Goat_Rumen-3__c2033 flye-dairy_64555 s8713.dairy-hifiasm008714l
VC1477	21	254.7	53500	19000	0.7379	1.57e-08	Sheep_Duodenum-2__c159579 flye-dairy_23439 Dairy_cattle_Rumen-4__c500737 Sheep_Cecum-5__c204776 Sheep_Colon-5__c31 contig_159966 flye-dairy_12613 flye-dairy_24879 flye-dairy_27099 flye-dairy_31460 flye-dairy_31463 flye-dairy_48695 flye-dairy_48703 flye-dairy_60245 flye-dairy_60247 flye-dairy_68586 s12944.dairy-hifiasm012945l s15464.dairy-hifiasm015465c s7172.dairy-hifiasm007173c s69818.dairy-hifi…
VC1478	20	193.5	36800	29200	0.557	1.28e-07	flye-dairy_76696 flye-dairy_53176 flye-dairy_66367 flye-dairy_69760 Dairy_cattle_Jejunum-6__c30 flye-dairy_41432 flye-dairy_61650 flye-dairy_63414 flye-dairy_67227 flye-dairy_67376 Dairy_cattle_Rumen-3__c337 flye-dairy_12688 flye-dairy_51977 flye-dairy_61280 flye-dairy_69128 flye-dairy_71192 s81290.dairy-hifiasm081303l flye-dairy_53177 s7272.dairy-hifiasm007273l s22278.dairy-hifiasm022280l
VC1479	5	202.8	2028	2605	0.4367	0.00609289	Dairy_cattle_Duodenum-3__c306123 Dairy_cattle_Omasum-3__c1032812 Dairy_cattle_Rumen-3__c2465942 flye-dairy_46323 s40296.dairy-hifiasm040301l
VC1480	102	27.55	142000	83000	0.6303	0	flye-dairy_63616 flye-dairy_80311 Goat_Jejunum-5__c3703 Roe_deer_Rumen-1__c396221_1 Sheep_Ileum-1__c193272 Water_deer_Ileum-2__c32503 Roe_deer_Rumen-5__c199524 Roe_deer_Jejunum-2__c842 Sheep_Ileum-4__c1543 Sheep_Jejunum-2__c211714 Sheep_Rumen-4__c3981 Water_deer_Rumen-5__c110645 Roe_deer_Jejunum-2__c31491 Sheep_Duodenum-2__c107 Sheep_Jejunum-1__c118437 Sheep_Ileum-5__c19148 flye-dairy_16045 flye-…
VC1481	4	42.36	254.2	4575	0.05254	0.992931	flye-dairy_81212 2022NBT-1822_1 Roe_deer_Rectum-4__c83153 Goat_Rumen-2__c136535
VC1482	2	24.53	24.53	527.3	0.04414	0.658454	flye-goat_17107_1 Goat_Omasum-4__c519255
VC1483	6	173.9	2608	13900	0.1576	0.977336	s22811.dairy-hifiasm022813l contig_60381 flye-dairy_24732 flye-dairy_77362 s20824.dairy-hifiasm020826l s87633.dairy-hifiasm087648l
VC1484	4	237	1422	16200	0.08062	0.992931	s28450.dairy-hifiasm028453l flye-dairy_14343 s30363.dairy-hifiasm030366l s45517.dairy-hifiasm045522l
VC1485	9	152.8	5502	2239	0.7091	0.000206148	2022NBT-53124 Sheep_Colon-4__c809 Goat_Colon-1__c426955 Roe_deer_Cecum-2__c2803_1 Roe_deer_Cecum-3__c614484 Roe_deer_Cecum-5__c4608 Roe_deer_Rectum-4__c758 Sheep_Colon-3__c1051957 Sheep_Colon-3__c309
VC1486	2	178.8	178.8	436.5	0.2887	0.979387	2022NBT-55538 2022NBT-72541
VC1487	2	6.973	6.973	29.81	0.171	0.979387	Goat_Cecum-6__c498400 Roe_deer_Cecum-3__c2588
VC1488	5	114.3	1143	5494	0.172	0.996692	2022NBT-56713 Roe_deer_Colon-3__c4226 Roe_deer_Rectum-1__c98996 Roe_deer_Rectum-5__c316 Water_buffalos_Rectum-3__c61735
VC1489	9	91.37	3289	4007	0.4497	0.000286817	Goat_Ileum-5__c30755 Roe_deer_Reticulum-2__c267273 flye-dairy_36199 flye-dairy_77609 flye-dairy_79727 flye-goat_21420 flye-dairy_39287 flye-dairy_59497 s59339.dairy-hifiasm059345l
VC1490	9	56.22	2024	9711	0.1722	0.999853	2022NBT-56713 Roe_deer_Colon-3__c4226 Roe_deer_Omasum-4__c5966_1 Roe_deer_Rectum-1__c98996 Roe_deer_Rectum-5__c316 flye-dairy_81278 s31803.dairy-hifiasm031806l Water_buffalos_Rectum-3__c61735 Sheep_Rectum-5__c85756
VC1491	23	151.5	38300	12100	0.7591	3.3e-09	2022NBT-62166 2022NBT-73188 2022NBT-79354 Goat_Cecum-3__c654915_1 Goat_Rumen-3__c1917 Roe_deer_Cecum-3__c355080 Roe_deer_Cecum-5__c4578 Roe_deer_Colon-3__c419490 Roe_deer_Jejunum-1__c151939 Roe_deer_Jejunum-1__c63900 Roe_deer_Reticulum-2__c217590 Roe_deer_Reticulum-3__c81344 Sheep_Abomasum-1__c255345 Sheep_Abomasum-4__c264539 Sheep_Abomasum-4__c280886 Water_deer_Abomasum-3__c22462 Water_deer_Abom…
VC1492	58	120.1	199000	66000	0.7503	0	Faecalibacterium~phage~FP_Lagaffe Sheep_Colon-2__c413599 Goat_Omasum-5__c119297 Roe_deer_Rumen-2__c479461 Goat_Cecum-3__c676338 Roe_deer_Cecum-1__c1407_1 Roe_deer_Colon-5__c434432 2022NBT-5118_1 2022NBT-38606_1 Dairy_cattle_Cecum-2__c53567 Dairy_cattle_Rectum-5__c33 Goat_Abomasum-1__c345057 Goat_Duodenum-3__c228540 Goat_Ileum-4__c133695 Goat_Omasum-1__c164226 Goat_Rectum-1__c142416_1 Goat_Rumen-2…
VC1493	2	182.1	182.1	710	0.2032	0.658454	Goat_Cecum-6__c624825_1 Goat_Cecum-2__c481038
VC1494	17	91.6	12500	798.3	0.9374	3.5e-07	Water_deer_Abomasum-3__c152458 contig_180955 Goat_Rumen-6__c1739 Water_deer_Rumen-2__c106749_1 Yak_Rumen-5__c969068_1 Sheep_Rumen-3__c1269436 Goat_Abomasum-1__c575268_1 Goat_Rumen-1__c36274 Water_buffalos_Rumen-1__c39873 Water_buffalos_Rumen-3__c502873 Water_deer_Colon-4__c359079_1 flye-dairy_11192 flye-dairy_11195 flye-dairy_77062 flye-goat_20790 s28212.goat-hifiasm028531l s64984.dairy-hifiasm06…
VC1495	2	77.01	77.01	634.2	0.1077	0.979387	Goat_Abomasum-2__c57500 Goat_Rumen-6__c551170
VC1496	18	20.2	3090	8163	0.2737	0.000472796	Goat_Colon-2__c290594 2022NBT-31812 Water_deer_Cecum-1__c361541 2022NBT-125666 2022NBT-114425 2022NBT-130892 2022NBT-132348 Goat_Abomasum-3__c717551 Goat_Cecum-5__c162688 Goat_Colon-6__c890305 Goat_Rectum-5__c12629 Goat_Reticulum-5__c454276 Goat_Rumen-3__c111068 Roe_deer_Rumen-5__c2524 Sheep_Colon-5__c84564 Sheep_Rectum-4__c737084 Water_deer_Cecum-1__c91677 Water_deer_Colon-2__c546106
VC1497	6	241.2	3619	3452	0.5109	0.00253743	Goat_Rumen-5__c971906 Roe_deer_Abomasum-5__c1108 Roe_deer_Jejunum-1__c38886 Roe_deer_Rumen-2__c821 Sheep_Rumen-4__c396 Water_deer_Reticulum-3__c247976
VC1498	2	3.341	3.341	80.97	0.03783	0.658454	Sheep_Rumen-1__c374545 Roe_deer_Omasum-3__c17772
VC1499	2	145.7	145.7	943.5	0.1333	0.979387	Water_buffalos_Rectum-2__c82388 Water_buffalos_Rectum-3__c373143
VC1500	8	116.9	3273	6336	0.34	0.562587	Yak_Duodenum-3__c329258 Yak_Rumen-5__c506234 flye-dairy_37666 flye-dairy_37667 flye-dairy_43696 flye-dairy_79829 s1277.dairy-hifiasm001278l Dairy_cattle_Jejunum-2__c708377
VC1501	11	79.69	4383	8297	0.3451	0.277265	Goat_Colon-6__c880036_1 Sheep_Colon-3__c385185 Sheep_Rectum-1__c1183 Sheep_Rectum-1__c903339_1 Water_deer_Colon-4__c157100_1 Water_deer_Rectum-3__c464891 Yak_Colon-3__c667021 Yak_Rectum-1__c11 Yak_Rectum-1__c730922 Yak_Rectum-3__c2 Yak_Rectum-3__c6
VC1502	2	369.4	369.4	1660	0.1816	0.658454	2022NBT-11296_1 2022NBT-42417
VC1503	3	286.5	859.4	518.6	0.6209	0.0404278	2022NBT-119_1 2022NBT-24849_1 2022NBT-70533
VC1504	9	125.6	4522	5471	0.4517	0.00403574	2022NBT-41255 Dairy_cattle_Colon-2__c1139433 Dairy_cattle_Colon-4__c197293 Dairy_cattle_Rectum-5__c769036 Water_buffalos_Colon-2__c648069 Water_buffalos_Cecum-2__c591305 Water_buffalos_Colon-5__c177576 Sheep_Cecum-2__c13488_1 Yak_Rectum-1__c807232
VC1505	11	71.11	3911	10200	0.2772	0.975578	Dairy_cattle_Rectum-6__c370 2022NBT-1556_1 Dairy_cattle_Colon-3__c248 Water_buffalos_Rumen-3__c272637_1 Yak_Rectum-2__c215307 flye-dairy_34167 flye-dairy_64565 flye-dairy_64597 flye-dairy_77595 flye-dairy_77920 s12553.dairy-hifiasm012554l
VC1506	5	104.6	1046	5438	0.1611	0.996692	2022NBT-59999_1 Goat_Rectum-1__c613437 Water_buffalos_Rectum-2__c201173 Yak_Rectum-1__c201896 Water_buffalos_Colon-3__c315575
VC1507	14	233.9	21300	17000	0.5559	3.73e-06	Goat_Rectum-2__c264409 Dairy_cattle_Colon-4__c607356 Dairy_cattle_Rectum-5__c8 Sheep_Cecum-3__c399151 Sheep_Rectum-1__c999 Water_buffalos_Rectum-5__c769478 Yak_Colon-3__c590112 Dairy_cattle_Colon-3__c785308 Dairy_cattle_Colon-5__c875906 Goat_Colon-2__c124976 Sheep_Rectum-3__c826312 Water_buffalos_Cecum-2__c8 Water_buffalos_Cecum-5__c885200 Dairy_cattle_Rectum-3__c972310
VC1508	3	175.8	527.4	4847	0.09802	0.985452	Goat_Rectum-3__c884445 Yak_Rectum-5__c1087568 Water_buffalos_Cecum-5__c873357
VC1509	6	227.8	3416	32500	0.09521	0.998474	Roe_deer_Reticulum-2__c1470 Sheep_Omasum-1__c263992_1 Water_deer_Abomasum-4__c12749 flye-goat_21009 flye-goat_21011 s24913.goat-hifiasm025204l
VC1510	2	302.7	302.7	2185	0.1215	0.979387	Sheep_Reticulum-5__c822513 s35635.dairy-hifiasm035639l
VC1511	2	271.7	271.7	3691	0.06851	0.979387	Goat_Rectum-4__c522754 Water_deer_Cecum-3__c487413
VC1512	16	144.1	17300	26400	0.3951	0.000425778	Water_buffalos_Rectum-5__c450251 Yak_Cecum-2__c979787 Sheep_Rectum-5__c689634_1 Yak_Rectum-4__c240498 Water_deer_Cecum-3__c347098 Dairy_cattle_Cecum-2__c799293 Dairy_cattle_Colon-2__c644751 Dairy_cattle_Rectum-3__c318759 Dairy_cattle_Rectum-4__c895748 Dairy_cattle_Rectum-5__c694763 Sheep_Rectum-1__c503318 Sheep_Rectum-3__c1723 Water_buffalos_Rectum-4__c101641 Yak_Cecum-1__c622228 Yak_Rectum-1__c8…
VC1513	13	64.91	5063	20700	0.1965	0.999961	Water_deer_Colon-2__c387739_1 Water_deer_Rumen-2__c432872 Sheep_Rumen-5__c1848145_1 Roe_deer_Abomasum-1__c20_1 Goat_Rectum-4__c24 flye-goat_3791 Roe_deer_Rumen-2__c203618 Water_buffalos_Colon-1__c778554 Water_deer_Rectum-3__c69063 Yak_Abomasum-2__c292123 Water_buffalos_Rumen-4__c1594352 Yak_Omasum-2__c104 Sheep_Abomasum-1__c114377
VC1514	59	57.32	98100	70400	0.5819	0	Water_deer_Rectum-5__c1268 Yak_Cecum-3__c420797 Yak_Rectum-2__c143266 Yak_Reticulum-1__c217228 Yak_Rumen-3__c319929 Dairy_cattle_Rectum-1__c387498 Dairy_cattle_Rectum-5__c15 Water_buffalos_Cecum-2__c1099774 Yak_Rumen-2__c356135 Yak_Rumen-3__c2338359 Yak_Rumen-4__c1935977 Water_buffalos_Reticulum-3__c534310 Yak_Duodenum-3__c228900 flye-dairy_66187 Water_buffalos_Cecum-5__c1009239 Water_buffalos_Co…
VC1515	2	371.3	371.3	3334	0.1001	0.979387	contig_177146 contig_87606
VC1516	16	95.65	11500	14900	0.435	0.0151131	s3786.dairy-hifiasm003787c flye-dairy_25312 flye-dairy_62167 flye-dairy_67518 s18092.dairy-hifiasm018094c s26807.dairy-hifiasm026809l contig_119593 contig_66668 contig_71178 contig_8181 contig_97757 flye-dairy_36978 flye-dairy_45696 flye-dairy_48614 s14609.dairy-hifiasm014610l s89907.dairy-hifiasm089922l
VC1517	8	131.1	3671	8082	0.3119	0.356596	flye-dairy_80611 contig_47647 flye-dairy_65783 s14625.dairy-hifiasm014626c s40458.dairy-hifiasm040463l s8279.dairy-hifiasm008280l flye-dairy_12689 s28501.dairy-hifiasm028504l
VC1518	22	150.8	34800	28500	0.5497	6.01e-08	Roe_deer_Omasum-4__c308 Water_deer_Rumen-2__c27 s51428.dairy-hifiasm051433l s20368.dairy-hifiasm020370l Goat_Abomasum-3__c230759 Roe_deer_Abomasum-2__c13 Roe_deer_Duodenum-1__c768_1 Roe_deer_Reticulum-4__c1511_1 Roe_deer_Rumen-1__c12597 Water_deer_Abomasum-1__c226425 Water_deer_Omasum-4__c235 contig_110780 contig_167435 flye-dairy_12961 flye-dairy_14338 flye-dairy_18658 flye-dairy_71219 flye-goat…
VC1519	5	220.8	2208	12200	0.1528	0.952654	flye-dairy_21148 flye-dairy_25735 flye-dairy_79655 s34812.dairy-hifiasm034816l s97490.dairy-hifiasm097508l
VC1520	6	256.9	3853	20200	0.16	0.998474	flye-dairy_71121 flye-dairy_73439 s4611.dairy-hifiasm004612c s44759.dairy-hifiasm044764l flye-dairy_64104 s7942.dairy-hifiasm007943l
VC1521	8	61.61	1725	21500	0.07422	0.994959	flye-dairy_75310 s6290.dairy-hifiasm006291l flye-dairy_45953 flye-dairy_61465 flye-dairy_39563 s1652.dairy-hifiasm001653l s5670.dairy-hifiasm005671l s42106.dairy-hifiasm042111l
VC1522	4	112.2	673.2	5223	0.114	0.992931	Sheep_Reticulum-5__c822513 flye-dairy_76430 s35635.dairy-hifiasm035639l s5527.dairy-hifiasm005528l
VC1523	2	289.6	289.6	491.3	0.3689	0.658454	2022NBT-2113_1 2022NBT-52747
VC1524	2	157.6	157.6	992.7	0.1365	0.979387	2022NBT-74138 2022NBT-78168
VC1525	10	95.88	4315	11400	0.2742	0.955513	Sheep_Duodenum-3__c173855 s17146.dairy-hifiasm017147c Water_deer_Jejunum-1__c20964 Water_deer_Rumen-5__c441220 flye-dairy_76219 flye-dairy_79511 s53503.dairy-hifiasm053508c s68407.dairy-hifiasm068416l s70932.dairy-hifiasm070943l Water_deer_Jejunum-5__c14936
VC1526	2	326.3	326.3	1329	0.1967	0.979387	Goat_Colon-6__c880036_1 Sheep_Colon-3__c385185
VC1527	3	184.6	553.7	402.6	0.5754	0.0404278	2022NBT-52331 2022NBT-47675_1 2022NBT-63846_1
VC1528	3	214.3	642.9	1088	0.3702	0.0404278	2022NBT-71599 2022NBT-49654 2022NBT-65670
VC1529	2	39.99	39.99	1706	0.02286	0.979387	Roe_deer_Rectum-2__c415813 2022NBT-70825
VC1530	2	17.65	17.65	27.41	0.3597	0.110336	contig_72733 contig_193897
VC1531	2	9.617	9.617	35.16	0.1972	0.658454	Sheep_Colon-2__c24401 Sheep_Colon-3__c736337
VC1532	3	44.47	133.4	136.4	0.4838	0.0404278	Goat_Cecum-1__c99239 Roe_deer_Colon-2__c36797 Water_deer_Colon-5__c192240
VC1533	43	68.42	61800	52400	0.5408	0	2022NBT-66620 Water_deer_Cecum-4__c1099_1 Water_buffalos_Colon-5__c501322 2022NBT-41085 2022NBT-33785 2022NBT-25525_1 2022NBT-38848_1 2022NBT-63569 2022NBT-67791 2022NBT-69220 2022NBT-85371 Dairy_cattle_Rectum-4__c535991 Dairy_cattle_Rectum-4__c908512 Roe_deer_Cecum-1__c180 Roe_deer_Cecum-2__c171296 Roe_deer_Cecum-2__c214176 Roe_deer_Cecum-2__c589069 Roe_deer_Cecum-3__c25697 Water_buffalos_Cecum-…
VC1534	3	155.4	466.3	1547	0.2309	0.808633	Roe_deer_Cecum-5__c199076_1 Roe_deer_Colon-1__c28251_1 Roe_deer_Rectum-1__c415080
VC1535	11	80.43	4424	7271	0.3775	0.0503338	Roe_deer_Rectum-2__c521911_1 Dairy_cattle_Cecum-2__c797074 Roe_deer_Cecum-1__c1765 Water_buffalos_Colon-2__c529177 flye-dairy_56615 Yak_Cecum-1__c574480 Yak_Rectum-1__c406106 Roe_deer_Cecum-4__c2914 Roe_deer_Cecum-5__c4569 Water_buffalos_Colon-2__c403056 s41422.dairy-hifiasm041427l
VC1536	16	138.1	16600	5626	0.7455	7.72e-07	Roe_deer_Rectum-4__c352988 Goat_Rectum-6__c445440 Roe_deer_Cecum-3__c462 Goat_Omasum-5__c602376_1 Water_buffalos_Colon-5__c532591 s15158.dairy-hifiasm015159l s58410.dairy-hifiasm058416l Sheep_Abomasum-2__c145987 Roe_deer_Rectum-2__c119257 Sheep_Rumen-1__c415423 Sheep_Rumen-5__c5238 Yak_Rumen-5__c1010154 Roe_deer_Rectum-2__c2593 Sheep_Abomasum-2__c18332 Water_buffalos_Colon-2__c261800 flye-dairy_6…
VC1537	6	91.53	1373	3409	0.2864	0.235585	contig_84356 Dairy_cattle_Reticulum-6__c774675 s84383.dairy-hifiasm084397l s91863.dairy-hifiasm091878l Dairy_cattle_Rumen-3__c101694 Dairy_cattle_Duodenum-3__c116776
VC1538	27	106.5	37400	25300	0.5965	0	Dairy_cattle_Duodenum-3__c2346 Dairy_cattle_Duodenum-3__c578577 Dairy_cattle_Duodenum-3__c74000 Dairy_cattle_Jejunum-1__c14814 Dairy_cattle_Jejunum-1__c596142 Sheep_Duodenum-2__c12014 Sheep_Duodenum-3__c305593 Sheep_Ileum-3__c105400 Sheep_Jejunum-5__c100017 Water_buffalos_Jejunum-2__c230 Water_buffalos_Rumen-5__c41358 Yak_Duodenum-1__c227162 Yak_Duodenum-3__c365940 Yak_Duodenum-3__c65612 s31573.d…
VC1539	3	211.2	633.6	686.5	0.4778	0.0404278	s1641.goat-hifiasm001698c flye-goat_21298 flye-goat_21312
VC1540	2	189.4	189.4	2087	0.08309	0.979387	Roe_deer_Rumen-2__c4573 Water_deer_Omasum-1__c27292
VC1541	22	77.29	17900	18800	0.486	2.1e-05	Sheep_Abomasum-5__c96916 Yak_Rumen-1__c1476545 Yak_Rumen-5__c1352964 flye-dairy_80871 2022NBT-17028_1 2022NBT-74828 2022NBT-74481 Goat_Rectum-4__c624945_1 Goat_Reticulum-2__c318116 Roe_deer_Rumen-2__c2749_1 Water_buffalos_Cecum-1__c820927 Water_buffalos_Cecum-4__c687043 Water_buffalos_Colon-3__c84043 Yak_Colon-2__c391547 contig_150559 flye-dairy_77161 flye-dairy_79401 flye-dairy_81265 s14966.dair…
VC1542	3	255.4	766.2	2119	0.265	0.985452	Yak_Duodenum-3__c278579 s5374.dairy-hifiasm005375l s6003.dairy-hifiasm006004l
VC1543	44	50.57	47800	58200	0.4508	3.56e-09	s22473.goat-hifiasm022738l 2022NBT-52741 Dairy_cattle_Colon-4__c404340 Dairy_cattle_Duodenum-3__c490295 Goat_Rumen-2__c584737 Roe_deer_Jejunum-1__c23 Roe_deer_Omasum-2__c417 Roe_deer_Reticulum-2__c1697 Roe_deer_Rumen-2__c4205 Sheep_Duodenum-1__c139 Sheep_Duodenum-2__c123533 Sheep_Duodenum-4__c17928 Sheep_Duodenum-5__c3042 Sheep_Ileum-1__c167806 Sheep_Ileum-4__c255663 Sheep_Ileum-4__c927 Sheep_Jej…
VC1544	4	109.7	657.9	867	0.4292	0.156161	2022NBT-54772 2022NBT-54829 Goat_Cecum-4__c722700 s50786.dairy-hifiasm050791l
VC1545	7	181.3	3808	21300	0.1514	0.997531	Dairy_cattle_Duodenum-1__c7258 Sheep_Jejunum-2__c240587 s13123.dairy-hifiasm013124l s36745.dairy-hifiasm036749l s53029.dairy-hifiasm053034l s64917.dairy-hifiasm064925l s72691.dairy-hifiasm072702c
VC1546	2	13.67	13.67	686.2	0.01942	0.979387	Roe_deer_Reticulum-4__c141132 flye-goat_4461
VC1547	2	30.73	30.73	181.9	0.1419	0.979387	Water_buffalos_Colon-1__c93063 Water_buffalos_Rectum-1__c715608
VC1548	2	245.4	245.4	5925	0.03974	0.979387	2022NBT-24579 2022NBT-57677
VC1549	5	168	1680	38300	0.04205	0.989214	Goat_Rumen-6__c937 Roe_deer_Abomasum-2__c233 flye-dairy_65728 Sheep_Omasum-4__c1048074 Water_buffalos_Reticulum-3__c835772
VC1550	64	49.39	99600	14200	0.8742	0	2022NBT-115430 2022NBT-117247 2022NBT-117764 2022NBT-41015_1 2022NBT-55313_1 Dairy_cattle_Cecum-4__c140218 Dairy_cattle_Cecum-4__c689129 Dairy_cattle_Duodenum-1__c543340 Goat_Abomasum-2__c54278 Goat_Cecum-4__c729963 Goat_Colon-1__c563238 Goat_Ileum-1__c161562 Goat_Ileum-2__c109633 Goat_Reticulum-5__c159873 Goat_Rumen-1__c421126 Goat_Rumen-6__c750091 Goat_Rumen-6__c848872 Roe_deer_Jejunum-1__c1042…
VC1551	4	103.4	620.3	7772	0.07384	0.993495	Roe_deer_Jejunum-2__c103 Roe_deer_Jejunum-3__c141 Roe_deer_Jejunum-3__c1940 Roe_deer_Jejunum-3__c87058
VC1552	7	76.42	1605	1647	0.4914	0.014921	Water_buffalos_Cecum-5__c92 2022NBT-51923 Goat_Colon-6__c627 Sheep_Rectum-3__c373707 Water_buffalos_Rectum-2__c457307 Water_buffalos_Rectum-5__c111 Yak_Rectum-1__c487175
VC1553	3	252.5	757.6	277.5	0.7277	0.0404278	2022NBT-38761_1 2022NBT-50524_1 2022NBT-78132
VC1554	2	132.7	132.7	1084	0.1087	0.658454	2022NBT-31726_1 2022NBT-45803_1
VC1555	3	113.8	341.3	554.6	0.3784	0.191367	Water_buffalos_Rumen-1__c60293 Goat_Jejunum-1__c41 Roe_deer_Jejunum-1__c28955
VC1556	3	190.6	571.8	4517	0.1122	0.985452	2022NBT-77802 2022NBT-8493_1 Sheep_Colon-2__c37_1
VC1557	11	155.2	8536	16300	0.3434	0.346794	Dairy_cattle_Duodenum-1__c422772 Dairy_cattle_Duodenum-3__c429962 Dairy_cattle_Jejunum-6__c36221 Water_buffalos_Cecum-4__c506482 Yak_Duodenum-3__c16684 Yak_Jejunum-5__c76 flye-dairy_27935 flye-dairy_52390 flye-dairy_68644 flye-dairy_72438 s72200.dairy-hifiasm072211l
VC1558	23	91.08	23000	33300	0.4085	0.00113013	Dairy_cattle_Duodenum-1__c501 Dairy_cattle_Omasum-3__c1043421 flye-dairy_80365 s44077.dairy-hifiasm044082l s79356.dairy-hifiasm079369l s83332.dairy-hifiasm083345l Sheep_Jejunum-2__c316381 Dairy_cattle_Jejunum-1__c9 Goat_Jejunum-2__c217 Yak_Rumen-3__c1478175 Yak_Jejunum-5__c165 Dairy_cattle_Duodenum-6__c22 Dairy_cattle_Jejunum-2__c1498513 s37910.dairy-hifiasm037914l s68381.dairy-hifiasm068390l s77…
VC1559	18	68.6	10500	10200	0.5071	8.2e-07	Roe_deer_Jejunum-3__c1592 Roe_deer_Jejunum-4__c68 Roe_deer_Rumen-2__c4010 Roe_deer_Cecum-1__c2444 Dairy_cattle_Duodenum-3__c274857 Roe_deer_Abomasum-2__c955 Roe_deer_Rumen-2__c2134 Roe_deer_Rumen-5__c385682 Sheep_Duodenum-1__c657 Yak_Duodenum-1__c277057 Yak_Duodenum-3__c163 Yak_Jejunum-5__c325516 Yak_Jejunum-5__c335990 flye-dairy_26977 flye-dairy_78985 s50319.dairy-hifiasm050324l s67359.dairy-hif…
VC1560	6	207.4	3111	6993	0.3075	0.764415	Dairy_cattle_Duodenum-3__c913 Sheep_Jejunum-1__c492 Water_buffalos_Rumen-3__c56496 flye-dairy_75428 s26060.goat-hifiasm026361l_1 contig_120625
VC1561	18	80.32	12300	11900	0.5083	2.66e-07	Goat_Ileum-1__c62118 Sheep_Jejunum-2__c91616 Yak_Duodenum-3__c457924 Yak_Jejunum-5__c190777 flye-dairy_64846 flye-dairy_67314 s49041.dairy-hifiasm049046l s6747.dairy-hifiasm006748l Dairy_cattle_Jejunum-2__c278860 Dairy_cattle_Jejunum-6__c252327 Dairy_cattle_Duodenum-1__c73414 Sheep_Duodenum-4__c73102 Yak_Duodenum-1__c111014 Yak_Duodenum-1__c49713 Sheep_Ileum-1__c82642 Goat_Ileum-3__c56151 Yak_Jej…
VC1562	5	61.65	616.5	5720	0.09714	0.952654	Roe_deer_Jejunum-3__c1592 flye-dairy_64051 Water_deer_Ileum-3__c94586 s29676.dairy-hifiasm029679l contig_139359
VC1563	7	72.75	1528	3302	0.3154	0.5	Dairy_cattle_Duodenum-3__c801016 Sheep_Jejunum-5__c903 Water_buffalos_Omasum-1__c589967 Sheep_Jejunum-1__c51768 Goat_Jejunum-2__c22 Sheep_Ileum-5__c74461 s76989.dairy-hifiasm077001l
VC1564	2	308.1	308.1	1522	0.168	0.979387	Yak_Duodenum-3__c43021 Yak_Jejunum-5__c3729
VC1565	4	144	864.3	986.3	0.465	0.0561756	flye-dairy_67715 s74294.dairy-hifiasm074305l contig_174166 contig_65233
VC1566	3	231.7	695.1	1208	0.3641	0.0404278	Goat_Ileum-6__c94024 Sheep_Jejunum-2__c885 Roe_deer_Jejunum-1__c150193
VC1567	4	91.89	551.3	1855	0.2283	0.903035	s74957.dairy-hifiasm074968l s93947.dairy-hifiasm093962l Dairy_cattle_Duodenum-3__c659 flye-dairy_68851
VC1568	3	243.5	730.4	4099	0.1511	0.985452	Sheep_Cecum-3__c431859 Sheep_Rectum-5__c732203 Water_buffalos_Cecum-5__c350779
VC1569	18	160.2	24500	48700	0.3348	0.443392	2022NBT-13418_1 2022NBT-33431_1 Goat_Cecum-1__c1522_1 Goat_Cecum-3__c27_1 Goat_Cecum-3__c513945 Goat_Cecum-4__c908298_1 Goat_Omasum-2__c274270_1 Goat_Omasum-2__c551625 Roe_deer_Abomasum-3__c1182 Roe_deer_Cecum-5__c2058_1 Roe_deer_Rumen-4__c1128_1 Sheep_Omasum-3__c169122 Water_buffalos_Cecum-4__c20 Water_buffalos_Cecum-4__c524183 Water_buffalos_Colon-1__c679056 Water_deer_Rumen-1__c332 flye-dairy_…
VC1570	6	234.5	3518	18400	0.1603	0.998474	Goat_Omasum-4__c80264 Sheep_Rumen-1__c261700 Water_buffalos_Colon-5__c219601 Water_buffalos_Rectum-1__c18779_1 Yak_Cecum-2__c290451 Yak_Colon-3__c49049
VC1571	3	3.265	9.795	187.8	0.04811	0.985452	Roe_deer_Cecum-1__c267268 Roe_deer_Cecum-2__c472 Goat_Colon-2__c65275
VC1572	20	203.7	38700	22900	0.6277	3.94e-08	Goat_Rumen-1__c685851 Water_buffalos_Rectum-5__c279357 Goat_Omasum-3__c223614_1 Sheep_Rumen-2__c1123260 Sheep_Rumen-3__c414178_1 Water_buffalos_Rumen-1__c757448 Water_deer_Rumen-5__c108837_1 Roe_deer_Rumen-4__c1822_1 2022NBT-688_1 Goat_Rumen-5__c297859_1 Roe_deer_Duodenum-1__c950 Roe_deer_Reticulum-4__c164982 Roe_deer_Rumen-1__c102533 Roe_deer_Rumen-1__c1540 Roe_deer_Rumen-2__c5998_1 Roe_deer_Rum…
VC1573	2	270.4	270.4	6038	0.04283	0.979387	Water_deer_Reticulum-4__c64 Water_deer_Omasum-5__c199246
VC1574	23	127.1	32200	61200	0.3444	0.0865849	Yak_Rumen-1__c655298 Roe_deer_Rectum-2__c292958 Roe_deer_Rumen-1__c465775 Water_buffalos_Rumen-1__c776341_1 Goat_Abomasum-5__c485783 Goat_Duodenum-3__c343260 Goat_Jejunum-4__c139263 Goat_Reticulum-5__c131350 Roe_deer_Abomasum-1__c276290 Water_buffalos_Omasum-3__c43368 Water_buffalos_Rectum-1__c978009 Water_buffalos_Rumen-1__c242400 Water_buffalos_Rumen-1__c272906 Water_buffalos_Rumen-3__c546683 W…
VC1575	2	84.75	84.75	6219	0.01344	0.979387	Yak_Rumen-5__c438525 s4604.goat-hifiasm004714l
VC1576	38	133.4	93800	56100	0.6256	0	contig_141261 Water_deer_Omasum-2__c48 contig_121013 flye-dairy_50973 flye-dairy_62050 flye-dairy_64161 s77366.dairy-hifiasm077378l contig_86638 s47003.dairy-hifiasm047008l s60642.dairy-hifiasm060648l Water_buffalos_Rumen-1__c676729 Water_deer_Abomasum-4__c34330 contig_74339 contig_97202 flye-dairy_23412 flye-dairy_26272 flye-dairy_26273 flye-dairy_50975 flye-dairy_52766 flye-dairy_58750 flye-dai…
VC1577	21	76.38	16000	19700	0.4485	1.33e-05	2022NBT-80780 Dairy_cattle_Colon-4__c798616 Dairy_cattle_Duodenum-3__c2522 Goat_Jejunum-6__c32628 Roe_deer_Jejunum-2__c426 Sheep_Duodenum-2__c111127 Yak_Duodenum-3__c320021 flye-dairy_44426 flye-dairy_61056 s14938.dairy-hifiasm014939l Dairy_cattle_Duodenum-3__c322522 s14252.dairy-hifiasm014253l Dairy_cattle_Duodenum-1__c555381 Sheep_Ileum-1__c236841 Sheep_Rumen-2__c226573 Water_deer_Ileum-3__c104…
VC1578	2	144.7	144.7	9778	0.01458	0.979387	flye-goat_21291 s23362.dairy-hifiasm023364l
VC1579	2	40.41	40.41	633.4	0.05961	0.658454	s66165.dairy-hifiasm066174l Water_deer_Abomasum-2__c37569
VC1580	7	13.37	280.7	1013	0.2146	0.989275	2022NBT-70232 2022NBT-51146_1 2022NBT-56169 Sheep_Rectum-3__c430274_1 Dairy_cattle_Rectum-4__c59997 2022NBT-72755 2022NBT-69201
VC1581	25	112.5	33800	20600	0.6201	1.02e-09	Dairy_cattle_Duodenum-3__c601021 flye-dairy_48575 flye-dairy_64993 flye-dairy_76162 flye-dairy_78112 flye-dairy_79901 flye-dairy_79935 flye-dairy_80072 flye-dairy_80233 s16207.dairy-hifiasm016208l s35486.dairy-hifiasm035490l s40754.dairy-hifiasm040759c s42413.dairy-hifiasm042418c s45361.dairy-hifiasm045366l s48295.dairy-hifiasm048300c s51801.dairy-hifiasm051806c s52926.dairy-hifiasm052931l s56110…
VC1582	3	135.5	406.4	1848	0.1798	0.985452	2022NBT-116019 2022NBT-44787_1 2022NBT-99696_1
VC1583	16	37.64	4516	13700	0.2479	0.921221	Goat_Rumen-5__c967194 Goat_Reticulum-5__c220161 2022NBT-116019 2022NBT-44787_1 2022NBT-99696_1 Dairy_cattle_Colon-4__c1375294_1 Goat_Abomasum-1__c233203 Goat_Abomasum-3__c346255 Goat_Colon-1__c150255 Goat_Reticulum-2__c279568 Goat_Reticulum-5__c302477 Goat_Rumen-5__c1673 Roe_deer_Cecum-1__c492976 Roe_deer_Jejunum-1__c184165 Sheep_Reticulum-3__c558652 Water_deer_Colon-4__c234101
VC1584	15	264	27700	57300	0.3259	0.675898	Roe_deer_Cecum-1__c311443 Water_buffalos_Cecum-4__c144856 Yak_Rumen-1__c1594108 Goat_Rumen-1__c977846 Yak_Jejunum-5__c155 Roe_deer_Jejunum-1__c221 Water_buffalos_Omasum-4__c1173766 Water_buffalos_Omasum-4__c884083 Water_deer_Colon-4__c270 Yak_Rumen-3__c804808 Yak_Rumen-4__c1236945 flye-dairy_27649 flye-dairy_71355 flye-dairy_79681 flye-dairy_81176
VC1585	2	245.6	245.6	124.2	0.6569	0.110336	2022NBT-29176 2022NBT-34228
VC1586	39	34.94	25900	13000	0.6647	0	Dairy_cattle_Jejunum-2__c832200 Dairy_cattle_Jejunum-6__c229462 Dairy_cattle_Reticulum-2__c76181 Goat_Rumen-1__c609054 Goat_Rumen-2__c681783 Goat_Rumen-5__c241938 Roe_deer_Jejunum-3__c544 Roe_deer_Rumen-5__c352394 Sheep_Abomasum-4__c615 Sheep_Ileum-3__c25480 Sheep_Rectum-5__c829439 Sheep_Reticulum-2__c325244 Sheep_Rumen-2__c1268239 Sheep_Rumen-4__c4536 Water_buffalos_Colon-2__c285327 Water_deer_A…
VC1587	7	15.85	332.9	2705	0.1091	0.999299	Yak_Cecum-2__c46 Sheep_Ileum-2__c54455 Dairy_cattle_Jejunum-2__c817954 Roe_deer_Rumen-1__c10953 Water_buffalos_Abomasum-4__c530944 s95208.dairy-hifiasm095225l Water_buffalos_Rumen-1__c823684
VC1588	3	152.9	458.8	3740	0.1091	0.985452	Water_deer_Colon-4__c67898 Roe_deer_Cecum-3__c372984 Roe_deer_Cecum-5__c1385
VC1589	2	41.96	41.96	489.3	0.0784	0.979387	Roe_deer_Rumen-1__c10953 Water_buffalos_Rumen-1__c823684
VC1590	3	98.24	294.7	3007	0.0891	0.985452	2022NBT-62601 2022NBT-76150 2022NBT-76139
VC1591	13	116.5	9085	9474	0.4888	0.00797066	Goat_Reticulum-2__c29520 Goat_Rumen-1__c354269_1 Roe_deer_Rumen-3__c27912 Water_deer_Rumen-4__c85987 flye-goat_10520 Roe_deer_Jejunum-1__c14505 Roe_deer_Jejunum-1__c9864 Roe_deer_Reticulum-5__c185090 Roe_deer_Rumen-1__c13463 Roe_deer_Rumen-2__c3927 Water_deer_Reticulum-3__c301315 s16263.goat-hifiasm016483l s59954.dairy-hifiasm059960l
VC1592	2	326.6	326.6	2268	0.1257	0.979387	contig_157561 contig_187089
VC1593	17	105.4	14300	12300	0.5378	8.44e-07	flye-goat_10104_1 Goat_Abomasum-5__c290591 flye-dairy_18216 flye-goat_1389_1 s32288.dairy-hifiasm032291c flye-goat_10315 Goat_Abomasum-6__c738 Goat_Rumen-2__c698865 Yak_Omasum-1__c501146 s42432.dairy-hifiasm042437l s8740.goat-hifiasm008896c s9927.dairy-hifiasm009928c Yak_Rumen-1__c591708 flye-dairy_80854 flye-goat_11083_1 s68251.dairy-hifiasm068260l s92748.dairy-hifiasm092763l
VC1594	18	28.93	4426	20300	0.1787	0.999899	2022NBT-3832_1 2022NBT-52150 Goat_Colon-5__c5_1 Roe_deer_Reticulum-1__c73729 Roe_deer_Rumen-1__c219055 Sheep_Rectum-4__c187849 Water_buffalos_Cecum-2__c670872 Yak_Rectum-1__c1048285 Yak_Rectum-4__c243581 contig_33220 flye-dairy_53926 flye-dairy_74901 s11150.dairy-hifiasm011151l s14733.dairy-hifiasm014734l s35072.dairy-hifiasm035076l s54731.dairy-hifiasm054736l s72857.dairy-hifiasm072868l s79734.d…
VC1595	6	27.53	412.9	3126	0.1163	0.998474	Yak_Rumen-1__c195889 s77098.dairy-hifiasm077110l s45831.dairy-hifiasm045836l Water_deer_Rumen-4__c11767 Water_deer_Rumen-2__c408962 Water_buffalos_Omasum-3__c527794
VC1596	4	145.4	872.2	16200	0.05108	0.992931	contig_37506 Yak_Jejunum-5__c69 contig_182510 s45861.dairy-hifiasm045866l
VC1597	2	54.93	54.93	403.6	0.1187	0.979387	flye-goat_7523 contig_128403
VC1598	2	5.17	5.17	0	0.5638	0.0969654	Goat_Abomasum-3__c324525 2022NBT-116825
VC1599	2	63.05	63.05	315.1	0.165	0.979387	Roe_deer_Reticulum-1__c1641 Water_deer_Rumen-5__c141765
VC1600	7	4.334	91.01	65.64	0.5333	0.00513188	Roe_deer_Rectum-4__c244631 Roe_deer_Colon-5__c341943_1 Sheep_Rectum-2__c575331 Yak_Duodenum-1__c27469 Roe_deer_Rumen-5__c545114 Yak_Duodenum-1__c40873 Yak_Rumen-2__c1594546_1
VC1601	2	40.17	40.17	140.1	0.218	0.979387	Roe_deer_Cecum-5__c60598 Roe_deer_Colon-5__c336161
VC1602	39	139.2	103000	18800	0.8456	0	2022NBT-32716 2022NBT-11746_1 2022NBT-40217 2022NBT-40853 2022NBT-596_1 2022NBT-7636_1 Goat_Abomasum-5__c169794 Goat_Omasum-4__c386005_1 Goat_Rumen-2__c248766 Goat_Rumen-5__c1954 Roe_deer_Cecum-2__c80648 Roe_deer_Duodenum-1__c58856_1 Roe_deer_Rumen-1__c13510_1 Roe_deer_Rumen-5__c171504 Water_deer_Cecum-1__c93129_1 Water_deer_Omasum-1__c21180_1 contig_155492 contig_48514 contig_52737 contig_54805 …
VC1603	4	287.2	1723	9181	0.1579	0.992931	Goat_Colon-5__c10 2022NBT-52053 Yak_Rectum-5__c1001757 Sheep_Colon-2__c569783
VC1604	5	101	1010	2387	0.2965	0.734565	Sheep_Ileum-1__c48264 Sheep_Ileum-4__c1149 flye-dairy_53423 flye-dairy_80448 s8175.dairy-hifiasm008176c
VC1605	2	262.1	262.1	615.8	0.2972	0.979387	Sheep_Ileum-4__c1149 flye-dairy_80448
VC1606	12	145.1	9576	9408	0.5038	0.00255395	flye-dairy_67093 flye-dairy_72975 flye-dairy_57249 flye-dairy_59069 flye-dairy_66837 flye-dairy_78806 s36434.dairy-hifiasm036438l s47765.dairy-hifiasm047770l s49936.dairy-hifiasm049941l contig_194490 s55098.dairy-hifiasm055103l s15324.dairy-hifiasm015325l
VC1607	2	36.62	36.62	2178	0.0165	0.979387	Sheep_Rumen-5__c264489 contig_165534
VC1608	2	5.744	5.744	19.39	0.1971	0.658454	Goat_Omasum-3__c635 Goat_Ileum-4__c22433
VC1609	2	37.02	37.02	598.6	0.05788	0.979387	flye-dairy_71533 s5175.goat-hifiasm005292l
VC1610	2	221.6	221.6	6006	0.03556	0.979387	2022NBT-43859 2022NBT-58757
VC1611	2	137.6	137.6	454.9	0.2306	0.979387	Goat_Cecum-2__c67710 Goat_Colon-2__c728572
VC1612	5	173.1	1731	1603	0.5175	0.00609289	Goat_Colon-5__c126349 2022NBT-57883 Goat_Cecum-2__c429190_1 Goat_Rectum-4__c624154_1 Yak_Cecum-2__c352253
VC1613	16	477.4	57300	7090	0.8894	7.72e-07	Yak_Rectum-4__c19 2022NBT-7515 2022NBT-8065 Goat_Cecum-2__c96 Roe_deer_Colon-3__c4440 Roe_deer_Rectum-4__c699 Water_buffalos_Colon-4__c3 Water_buffalos_Colon-5__c3 Water_buffalos_Rectum-5__c458306 Yak_Cecum-1__c667371 Roe_deer_Colon-2__c1201 Sheep_Colon-4__c603806 Water_buffalos_Rectum-4__c186104 Water_buffalos_Rectum-4__c21561 Yak_Rectum-1__c1085061 Yak_Rectum-1__c272784
VC1614	2	17.24	17.24	9.877	0.554	0.110336	2022NBT-118291 Water_deer_Cecum-2__c548030_1
VC1615	2	165.1	165.1	3988	0.03972	0.979387	2022NBT-15366 2022NBT-44583
VC1616	2	224.1	224.1	524.7	0.2977	0.658454	2022NBT-28165 Yak_Rectum-1__c373885
VC1617	3	138.1	414.3	1020	0.2877	0.904785	Water_buffalos_Cecum-2__c1111362 Yak_Duodenum-3__c420069 Yak_Jejunum-5__c123768
VC1618	26	68.08	22100	28600	0.4357	2.95e-06	Dairy_cattle_Duodenum-1__c282255 Dairy_cattle_Duodenum-1__c376415 Dairy_cattle_Duodenum-1__c461119 Dairy_cattle_Duodenum-1__c632499 Dairy_cattle_Duodenum-3__c185047 Dairy_cattle_Duodenum-3__c286219 Dairy_cattle_Duodenum-3__c469963 Dairy_cattle_Duodenum-3__c60451 Dairy_cattle_Duodenum-3__c65921 Dairy_cattle_Duodenum-3__c703016 Dairy_cattle_Duodenum-3__c718770 Dairy_cattle_Duodenum-6__c190895 Dairy…
VC1619	2	16.99	16.99	313.5	0.05078	0.979387	Dairy_cattle_Jejunum-2__c16493 Yak_Jejunum-5__c212239
VC1620	58	46.93	77600	21000	0.7858	0	2022NBT-118829 Dairy_cattle_Duodenum-1__c376415 Dairy_cattle_Duodenum-1__c398343 Dairy_cattle_Duodenum-1__c461119 Dairy_cattle_Duodenum-1__c632499 Dairy_cattle_Duodenum-3__c185047 Dairy_cattle_Duodenum-3__c286219 Dairy_cattle_Duodenum-3__c290918 Dairy_cattle_Duodenum-3__c390 Dairy_cattle_Duodenum-3__c404444 Dairy_cattle_Duodenum-3__c42202 Dairy_cattle_Duodenum-3__c444 Dairy_cattle_Duodenum-3__c44…
VC1621	8	65.82	1843	1975	0.4808	0.00679364	Dairy_cattle_Duodenum-3__c2384 Dairy_cattle_Duodenum-3__c496444 Yak_Duodenum-1__c82667 Yak_Jejunum-5__c325791 Dairy_cattle_Duodenum-1__c457497 Dairy_cattle_Jejunum-1__c172879 Sheep_Jejunum-3__c191904 Yak_Duodenum-3__c88297
VC1622	2	90.51	90.51	1023	0.08095	0.979387	Yak_Duodenum-1__c62638 Yak_Jejunum-5__c9410
VC1623	5	52.99	529.9	6173	0.07893	0.996692	Dairy_cattle_Jejunum-1__c33468 Goat_Duodenum-1__c55880 Roe_deer_Colon-2__c330764 Sheep_Duodenum-1__c127890 Water_buffalos_Jejunum-5__c154977
VC1624	3	97.47	292.4	3208	0.08339	0.985452	Roe_deer_Colon-2__c330764 Sheep_Duodenum-1__c127890 Water_buffalos_Jejunum-5__c154977
VC1625	4	83.7	502.2	2404	0.1723	0.984809	Yak_Jejunum-3__c4963 Yak_Cecum-2__c546087 Yak_Duodenum-3__c140298 Yak_Duodenum-3__c420885
VC1626	14	42.05	3826	1530	0.7106	3.72e-06	Sheep_Duodenum-3__c63259 Yak_Cecum-2__c59957 Dairy_cattle_Duodenum-3__c2812 Sheep_Jejunum-1__c185073 Yak_Duodenum-3__c158684 Yak_Duodenum-3__c68593 Yak_Jejunum-5__c121 Yak_Jejunum-5__c196655 Yak_Rectum-4__c681860 Yak_Rectum-4__c914657 Sheep_Duodenum-4__c829 Yak_Duodenum-3__c185398 Yak_Duodenum-3__c352494 Yak_Jejunum-5__c71563
VC1627	3	62.71	188.1	1461	0.1137	0.985452	Yak_Jejunum-5__c162359 Dairy_cattle_Duodenum-1__c95123 Dairy_cattle_Duodenum-1__c239960
VC1628	17	49.41	6719	8902	0.4292	0.00723276	Roe_deer_Rectum-3__c2140 Yak_Cecum-3__c750482 Yak_Colon-4__c567674 2022NBT-76470 2022NBT-8887_1 Yak_Jejunum-5__c38655 Yak_Rectum-3__c70041 Yak_Rectum-4__c526897 s12278.dairy-hifiasm012279l Water_buffalos_Cecum-4__c215990 2022NBT-28621_1 2022NBT-28787 2022NBT-62871 2022NBT-8793_1 Yak_Rectum-1__c846886 2022NBT-86120 Yak_Rumen-3__c10476
VC1629	2	238	238	411.9	0.364	0.110336	2022NBT-23693_1 2022NBT-34606_1
VC1630	4	142.9	857.2	6849	0.1111	0.992931	contig_123767 contig_187483 contig_148986 contig_33884
VC1631	15	13.99	1469	1001	0.5877	1.38e-05	Chlamydia~phage~2 Bdellovibrio~phage~phiMH2K Chlamydia~phage~4 Chlamydia~phage~CPG1 Chlamydia~virus~CPAR39 Escherichia~phage~EC6098 Goat_Ileum-6__c47158 Goat_Ileum-6__c56905 Sheep_Omasum-3__c344133 Sheep_Rectum-3__c360709_1 Water_buffalos_Cecum-4__c79481_1 Water_deer_Rumen-1__c355133 Yak_Cecum-2__c318896_1 Yak_Cecum-4__c147407 Yak_Cecum-4__c364915
VC1632	7	76.19	1600	8312	0.1612	0.996387	Dairy_cattle_Abomasum-3__c30024 Dairy_cattle_Cecum-4__c372071 Dairy_cattle_Duodenum-3__c2112 Dairy_cattle_Duodenum-4__c753716 Dairy_cattle_Jejunum-2__c977 Yak_Jejunum-5__c322995 Dairy_cattle_Duodenum-1__c1132
VC1633	13	21.49	1676	6518	0.2039	0.998267	Dairy_cattle_Duodenum-2__c317842 Yak_Jejunum-5__c162359 Yak_Jejunum-5__c343214 Yak_Abomasum-5__c77555 Yak_Jejunum-3__c4963 Dairy_cattle_Duodenum-1__c95123 Goat_Jejunum-4__c107280 Water_buffalos_Abomasum-1__c729584 Yak_Cecum-2__c546087 Yak_Duodenum-3__c140298 Yak_Duodenum-3__c420885 Yak_Rumen-1__c2134303 Dairy_cattle_Duodenum-1__c239960
VC1634	17	60.83	8273	10700	0.4349	5.02e-07	Dairy_cattle_Duodenum-1__c5719 Dairy_cattle_Duodenum-1__c636790 Dairy_cattle_Duodenum-3__c1842 Dairy_cattle_Duodenum-3__c635403 Dairy_cattle_Duodenum-3__c649948 Dairy_cattle_Duodenum-3__c687763 Dairy_cattle_Jejunum-1__c407915 Dairy_cattle_Jejunum-6__c69589 Goat_Jejunum-2__c15 Yak_Colon-5__c524020 Yak_Jejunum-5__c139647 Yak_Jejunum-5__c17180 Yak_Jejunum-5__c355069 Yak_Jejunum-5__c368768 Yak_Rectum…
VC1635	14	74.12	6745	13800	0.3273	0.905062	Dairy_cattle_Duodenum-1__c684 Dairy_cattle_Duodenum-1__c68565 Water_buffalos_Rectum-3__c28116 Water_buffalos_Rumen-3__c1845605 Water_buffalos_Rumen-3__c897596 Water_deer_Ileum-3__c58392 Yak_Duodenum-3__c14 Yak_Jejunum-5__c125835 Yak_Jejunum-5__c299615 Yak_Jejunum-5__c77163 Yak_Rectum-4__c558343 Dairy_cattle_Duodenum-3__c91103 Yak_Duodenum-3__c317113 Yak_Duodenum-3__c385746
VC1636	17	38.39	5221	13100	0.2849	0.983647	Dairy_cattle_Duodenum-1__c360349 Dairy_cattle_Duodenum-3__c466 Sheep_Jejunum-3__c251 Yak_Duodenum-1__c352134 Dairy_cattle_Duodenum-3__c170452 Dairy_cattle_Duodenum-6__c33507 Dairy_cattle_Jejunum-1__c187679 Dairy_cattle_Jejunum-1__c363522 Dairy_cattle_Jejunum-6__c116450 Sheep_Duodenum-4__c519 Sheep_Jejunum-1__c717 Yak_Cecum-2__c1078992 Yak_Duodenum-3__c400468 Yak_Jejunum-5__c170612 Yak_Rectum-1__c…
VC1637	5	28.99	289.9	1388	0.1717	0.851865	Dairy_cattle_Duodenum-3__c289605 Dairy_cattle_Duodenum-3__c591226 Sheep_Jejunum-3__c116598 Dairy_cattle_Duodenum-3__c681853 Sheep_Duodenum-3__c44950
VC1638	2	62.64	62.64	223.4	0.216	0.658454	Dairy_cattle_Duodenum-1__c169802 Dairy_cattle_Duodenum-3__c564943
VC1639	16	62.28	7473	2404	0.7542	7.69e-07	Dairy_cattle_Duodenum-3__c154912 Dairy_cattle_Jejunum-2__c909321 Yak_Colon-3__c180077 Yak_Duodenum-3__c102179 Yak_Duodenum-3__c141040 Yak_Duodenum-3__c305173 Yak_Duodenum-3__c338105 Yak_Duodenum-3__c343784 Yak_Duodenum-3__c358135 Yak_Duodenum-3__c448190 Yak_Jejunum-5__c309910 Yak_Reticulum-4__c254873 Yak_Rumen-2__c952831 Yak_Rumen-4__c2090135 Dairy_cattle_Jejunum-2__c1188272 Yak_Duodenum-1__c1635…
VC1640	4	34.62	207.7	2784	0.06925	0.992931	Goat_Duodenum-1__c100730 Goat_Ileum-6__c113601 Sheep_Ileum-4__c23510 Water_deer_Cecum-4__c142368
VC1641	2	26.32	26.32	491.5	0.05043	0.979387	Dairy_cattle_Jejunum-1__c618014 Water_buffalos_Jejunum-2__c171472
VC1642	3	70.64	211.9	391.7	0.3476	0.33126	Sheep_Jejunum-3__c116598 Dairy_cattle_Duodenum-3__c681853 Sheep_Duodenum-3__c44950
VC1643	5	197.3	1973	1992	0.4963	0.00609289	2022NBT-60933 2022NBT-76996 Goat_Ileum-5__c9 2022NBT-47987 Dairy_cattle_Jejunum-1__c327
VC1644	2	60.25	60.25	1388	0.04149	0.979387	Water_buffalos_Cecum-4__c101 Water_buffalos_Colon-1__c907728
VC1645	3	514.8	1544	0	0.9961	0.0318013	2022NBT-12207 2022NBT-11966 2022NBT-29561
VC1646	4	20.72	124.3	1076	0.1028	0.992931	contig_75640 Goat_Omasum-4__c483130 contig_168397 Goat_Omasum-3__c259952
VC1647	2	68.96	68.96	231.1	0.2268	0.658454	Sheep_Rumen-3__c144141 Sheep_Reticulum-3__c222973
VC1648	2	146.8	146.8	1918	0.07094	0.979387	Sheep_Rumen-4__c417280 Sheep_Abomasum-4__c215611
VC1649	4	127.9	767.6	15500	0.04715	0.903035	2022NBT-33788 2022NBT-32431 2022NBT-30443 Roe_deer_Reticulum-4__c415
VC1650	18	222.8	34100	75200	0.3118	0.824677	Goat_Rumen-6__c298151 Roe_deer_Jejunum-1__c181280 Roe_deer_Rectum-5__c3097_1 Roe_deer_Rumen-4__c2608 Roe_deer_Rumen-5__c3359 Sheep_Abomasum-4__c1043 Sheep_Abomasum-4__c414599 Sheep_Abomasum-5__c480517 Sheep_Rumen-1__c1465226 Sheep_Rumen-3__c320026 Water_deer_Abomasum-5__c120629 Yak_Rumen-5__c341616 Yak_Rumen-5__c540837 flye-dairy_74725 flye-goat_18388_1 s24889.goat-hifiasm025180l s38988.dairy-hif…
VC1651	3	173.5	520.6	2676	0.1626	0.959572	Dairy_cattle_Cecum-2__c221 Water_buffalos_Colon-2__c196197 Yak_Rectum-1__c601592
VC1652	25	122.1	36600	17300	0.6787	1.16e-09	Yak_Rectum-5__c138441 Water_buffalos_Cecum-2__c25968 Yak_Cecum-3__c333470 Dairy_cattle_Rectum-5__c683451 Dairy_cattle_Cecum-2__c214 Goat_Reticulum-3__c329125_1 Roe_deer_Omasum-2__c2771 Sheep_Abomasum-2__c337526 Water_buffalos_Rumen-5__c1431764 Yak_Rectum-4__c164569 Yak_Rectum-5__c94527 flye-dairy_31969 flye-dairy_38086 flye-dairy_52954 flye-dairy_71208 flye-dairy_80098 flye-dairy_80485 s19614.dai…
VC1653	12	150.1	9906	5134	0.6576	1.83e-05	Dairy_cattle_Duodenum-1__c749 contig_136851 flye-dairy_77675 flye-dairy_78523 s11343.dairy-hifiasm011344l s16657.dairy-hifiasm016658l s20511.dairy-hifiasm020513l s49607.dairy-hifiasm049612c s52233.dairy-hifiasm052238l s92633.dairy-hifiasm092648l s93589.dairy-hifiasm093604l Dairy_cattle_Duodenum-1__c175
VC1654	3	19.44	58.33	1513	0.03697	0.985452	Roe_deer_Omasum-1__c2499 Goat_Rumen-3__c605836 s17586.dairy-hifiasm017587l
VC1655	2	197	197	1733	0.1018	0.979387	Sheep_Rumen-3__c425999 Goat_Reticulum-1__c308667
VC1656	8	9.923	277.8	20.93	0.8827	0.000389067	Goat_Omasum-2__c494498_1 Dairy_cattle_Rumen-6__c1236562 Roe_deer_Rumen-5__c3378 Yak_Duodenum-1__c331643 Yak_Duodenum-1__c387131 Yak_Jejunum-5__c314523 Yak_Rumen-2__c718593_1 Goat_Reticulum-2__c68434
VC1657	14	109.7	9980	31500	0.2405	0.943539	Goat_Reticulum-6__c447 flye-dairy_30076 Goat_Reticulum-1__c338168_1 Roe_deer_Omasum-3__c1218 Roe_deer_Omasum-4__c3772_1 Sheep_Abomasum-5__c328691 Sheep_Duodenum-5__c139899 Sheep_Omasum-2__c890735 Sheep_Rumen-4__c2048_1 contig_141728 contig_187886 flye-dairy_31614_1 flye-dairy_75364 Goat_Reticulum-6__c220465
VC1658	3	158.9	476.7	1293	0.2685	0.66874	2022NBT-17667_1 2022NBT-56847 2022NBT-73209
VC1659	2	123.3	123.3	682.9	0.1522	0.979387	2022NBT-44369 2022NBT-75371
VC1660	2	390.8	390.8	1974	0.165	0.979387	2022NBT-5480_1 2022NBT-70147
VC1661	3	105.6	316.7	1845	0.1461	0.985452	Goat_Rumen-1__c473284 Sheep_Duodenum-3__c27286 Sheep_Rumen-4__c4140
VC1662	4	185.8	1115	720.1	0.6049	0.0151914	flye-dairy_50952 Dairy_cattle_Jejunum-1__c91987 contig_122766 flye-dairy_67238
VC1663	2	247.6	247.6	3072	0.07451	0.979387	Roe_deer_Rumen-4__c179685 Sheep_Rumen-3__c778177
VC1664	4	103.5	621.2	2881	0.177	0.903035	Water_deer_Ileum-1__c33792 Water_deer_Omasum-3__c570 Sheep_Omasum-1__c442396 Sheep_Rumen-1__c397013
VC1665	2	20.23	20.23	663.9	0.02939	0.979387	Roe_deer_Rectum-4__c345831 Water_buffalos_Omasum-1__c493010
VC1666	32	128.1	63600	29500	0.6825	0	2022NBT-43894 2022NBT-20725 Dairy_cattle_Duodenum-3__c430995 Dairy_cattle_Jejunum-1__c344956 Goat_Rumen-1__c379760 Goat_Rumen-1__c705122 Goat_Rumen-6__c380334 Sheep_Rumen-3__c1192597 Water_buffalos_Cecum-2__c607799 Water_buffalos_Omasum-4__c61 Water_buffalos_Rumen-2__c2655444 Water_buffalos_Rumen-2__c374047 Water_deer_Colon-2__c371220 Yak_Duodenum-3__c277510 Yak_Duodenum-3__c286918 Yak_Omasum-1__…
VC1667	12	88.67	5852	9961	0.3695	0.272185	2022NBT-56147 Sheep_Ileum-1__c62620 Dairy_cattle_Duodenum-1__c476890 Dairy_cattle_Duodenum-3__c317367 Dairy_cattle_Jejunum-6__c190851 Dairy_cattle_Jejunum-6__c54553 Goat_Jejunum-6__c89742 Water_buffalos_Rumen-1__c1212960 Yak_Duodenum-3__c281366 Yak_Rectum-5__c912982 flye-dairy_63473 flye-dairy_67263
VC1668	2	62.12	62.12	10.64	0.8093	0.110336	2022NBT-135456 2022NBT-120311
VC1669	3	77.28	231.9	3.827	0.9593	0.0382613	2022NBT-124426 2022NBT-120427 Sheep_Duodenum-2__c172113
VC1670	2	213.3	213.3	117.4	0.6374	0.110336	2022NBT-21874 2022NBT-28207
VC1671	3	9.508	28.52	42.99	0.368	0.33126	Sheep_Jejunum-4__c43016 Water_buffalos_Colon-5__c616341 Water_deer_Colon-1__c52452
VC1672	4	44.17	265	2228	0.106	0.969699	2022NBT-40610_1 2022NBT-79015 2022NBT-31726_1 2022NBT-45803_1
VC1673	30	74.15	32300	43000	0.4283	1.08e-06	Dairy_cattle_Duodenum-1__c396 Dairy_cattle_Duodenum-1__c564073 Dairy_cattle_Duodenum-3__c164692 Dairy_cattle_Jejunum-2__c1166 Dairy_cattle_Jejunum-2__c181416 Dairy_cattle_Jejunum-6__c283049 Dairy_cattle_Jejunum-6__c32802 Sheep_Duodenum-2__c354 Water_buffalos_Rumen-4__c1480156 Yak_Jejunum-5__c336929 flye-dairy_50965 Dairy_cattle_Duodenum-6__c6 Dairy_cattle_Rectum-5__c473055 Dairy_cattle_Jejunum-6_…
VC1674	8	145.4	4070	14700	0.2172	0.813985	Dairy_cattle_Duodenum-1__c564073 Dairy_cattle_Jejunum-2__c1166 Dairy_cattle_Jejunum-2__c181416 Dairy_cattle_Jejunum-6__c32802 Sheep_Duodenum-2__c354 Sheep_Jejunum-1__c137585 Dairy_cattle_Duodenum-3__c1328 s66667.dairy-hifiasm066676c
VC1675	12	59.42	3921	12300	0.242	0.829611	Water_buffalos_Cecum-4__c11_1 Water_buffalos_Colon-5__c526246 Water_buffalos_Rectum-3__c335287 Water_buffalos_Rectum-1__c475565 Roe_deer_Colon-2__c176799_1 Dairy_cattle_Colon-4__c1122871 Water_buffalos_Colon-5__c864981 Dairy_cattle_Duodenum-3__c148560 Water_buffalos_Rectum-3__c306513 Water_buffalos_Rectum-5__c71526 Yak_Rectum-1__c974584 Water_buffalos_Rumen-3__c1900843
VC1676	10	86.58	3896	28300	0.1209	0.999933	Roe_deer_Omasum-4__c103524 Sheep_Rumen-5__c1597744 Sheep_Duodenum-5__c205600 s54315.dairy-hifiasm054320l Dairy_cattle_Jejunum-1__c28075 Yak_Duodenum-1__c274628 Yak_Jejunum-5__c184389 s70719.dairy-hifiasm070730l Sheep_Ileum-4__c180327 Yak_Duodenum-3__c326635
VC1677	3	105.4	316.1	5398	0.05526	0.985452	Sheep_Jejunum-2__c258584 Dairy_cattle_Duodenum-3__c314375 s81650.dairy-hifiasm081663l
VC1678	4	98.58	591.5	1354	0.3029	0.557383	Streptococcus~phage~phiARI0131-2 Streptococcus~phage~PH10 Streptococcus~phage~SpSL1 Streptococcus~phage~phiARI0923
VC1679	8	80.72	2260	12000	0.1583	0.999679	Water_buffalos_Jejunum-2__c99315 s50443.dairy-hifiasm050448l s68415.dairy-hifiasm068424l s66965.dairy-hifiasm066974l Sheep_Jejunum-1__c270022 flye-dairy_45106 Dairy_cattle_Duodenum-3__c601345 Yak_Rumen-2__c911919
VC1680	8	146.4	4099	7340	0.3578	0.437413	flye-dairy_66406 s91339.dairy-hifiasm091354l Yak_Duodenum-1__c1 s97325.dairy-hifiasm097343l flye-dairy_78043 s63075.dairy-hifiasm063081l s70078.dairy-hifiasm070089l s37371.dairy-hifiasm037375l
VC1681	17	51.82	7047	17700	0.2847	0.925999	contig_86919 flye-dairy_49214 Sheep_Duodenum-2__c262406 Water_deer_Abomasum-4__c227622 Water_deer_Omasum-2__c61109 Water_deer_Rectum-1__c119254 flye-dairy_65403 s78538.dairy-hifiasm078551l s28085.dairy-hifiasm028088l s34029.dairy-hifiasm034033l flye-dairy_14848 Roe_deer_Rumen-2__c2560 Sheep_Jejunum-5__c142029 flye-dairy_69000 s64676.dairy-hifiasm064684l Dairy_cattle_Jejunum-6__c292 s62708.dairy-h…
VC1682	5	228.3	2283	10200	0.1822	0.996692	flye-dairy_26719 Dairy_cattle_Jejunum-1__c401376 flye-dairy_62884 flye-dairy_65832 s73376.dairy-hifiasm073387l
VC1683	12	37.21	2456	10300	0.1918	0.984809	Sheep_Ileum-5__c94877 Yak_Duodenum-3__c46501 Water_buffalos_Rumen-3__c1687086 s8945.dairy-hifiasm008946l_1 Sheep_Duodenum-2__c41024 Sheep_Jejunum-2__c300937 Sheep_Rumen-2__c415423 s16718.dairy-hifiasm016719l Roe_deer_Rumen-2__c6143 Goat_Ileum-6__c164966 Dairy_cattle_Jejunum-1__c61772 Sheep_Omasum-2__c14786
VC1684	12	41.39	2732	1036	0.7204	1.82e-05	Dairy_cattle_Duodenum-1__c500985 2022NBT-121262 Dairy_cattle_Duodenum-1__c742 Dairy_cattle_Duodenum-3__c100142 Dairy_cattle_Duodenum-3__c519034 Dairy_cattle_Jejunum-1__c66 Water_buffalos_Cecum-4__c262785 Yak_Cecum-2__c409658 Yak_Colon-2__c303927 Yak_Jejunum-5__c71983 Yak_Rectum-4__c273242 Yak_Rectum-4__c993061
VC1685	2	88.07	88.07	422.9	0.171	0.979387	Dairy_cattle_Jejunum-1__c534813 Sheep_Ileum-3__c63952
VC1686	2	6.869	6.869	124.2	0.05087	0.979387	Water_buffalos_Colon-2__c559446 Sheep_Abomasum-2__c617946
VC1687	3	53.65	161	62.55	0.7013	0.0360991	Yak_Reticulum-1__c1304786 Yak_Duodenum-1__c370159 Yak_Cecum-5__c650930
VC1688	4	124.3	746	4287	0.148	0.992931	2022NBT-69794 Roe_deer_Rumen-4__c38455 Water_deer_Reticulum-4__c51067_1 flye-dairy_80507
VC1689	4	254.7	1528	1251	0.5484	0.0151914	Dairy_cattle_Cecum-4__c511 Roe_deer_Colon-2__c1850 Roe_deer_Rectum-4__c1026 Water_deer_Rectum-3__c24
VC1690	3	132	396	920.7	0.2994	0.808633	2022NBT-76265 2022NBT-79113 2022NBT-79173
VC1691	2	7.983	7.983	471.8	0.0165	0.979387	2022NBT-83258 contig_189047
VC1692	3	50.39	151.2	3994	0.03642	0.808633	Clostridium~phage~vB_CpeS-CP51 Goat_Ileum-4__c328226 flye-goat_13417
VC1693	2	143.8	143.8	5239	0.02669	0.979387	Dairy_cattle_Cecum-3__c256912 Water_buffalos_Rectum-1__c439995
VC1694	2	290.3	290.3	2234	0.1148	0.979387	Goat_Duodenum-3__c102362 flye-goat_5982
VC1695	10	213.7	9618	29500	0.2458	0.999933	Goat_Rumen-1__c832208 Roe_deer_Omasum-2__c1157 Roe_deer_Reticulum-2__c1599 Roe_deer_Rumen-2__c3895 Roe_deer_Rumen-4__c2566 Roe_deer_Rumen-5__c3240 Sheep_Rectum-2__c652718 Sheep_Rumen-2__c1429795 Sheep_Rumen-5__c4768 s1318.goat-hifiasm001365c
VC1696	2	211.5	211.5	769.9	0.2147	0.658454	Sheep_Omasum-1__c442396 Sheep_Rumen-1__c397013
VC1697	8	50.5	1414	8496	0.1424	0.999679	Sheep_Rumen-2__c1421110 Goat_Jejunum-1__c202854 s70234.dairy-hifiasm070245l s76912.dairy-hifiasm076924l Sheep_Jejunum-1__c256476 s89545.dairy-hifiasm089560l s96380.dairy-hifiasm096398l Dairy_cattle_Jejunum-1__c370122
VC1698	6	71.91	1079	7457	0.1262	0.99588	Dairy_cattle_Rumen-2__c260095 Goat_Omasum-2__c55354 Goat_Rumen-2__c174017 Yak_Cecum-3__c1078597 Yak_Cecum-3__c371254 flye-dairy_64134
VC1699	53	166.4	229000	64300	0.7808	0	flye-dairy_81287 Water_deer_Rectum-1__c371 Yak_Abomasum-5__c348678 flye-dairy_45193 flye-dairy_71404 flye-dairy_75910 s38425.dairy-hifiasm038430c 2022NBT-48812 Goat_Rectum-3__c167572 Goat_Rumen-5__c194 Roe_deer_Colon-2__c477973 Roe_deer_Jejunum-1__c379 Roe_deer_Reticulum-3__c1569 Sheep_Jejunum-1__c10807 Sheep_Omasum-2__c407 Water_buffalos_Rectum-1__c762680 Water_buffalos_Rumen-2__c1902426 Water_d…
VC1700	2	269.1	269.1	1235	0.1785	0.979387	contig_123560 contig_170686
VC1701	3	40.59	121.8	3937	0.02996	0.985452	contig_37385 s88744.dairy-hifiasm088759l s26401.goat-hifiasm026705l
VC1702	7	83.91	1762	8077	0.1788	0.999299	2022NBT-69794 Roe_deer_Rumen-4__c38455 Water_deer_Reticulum-4__c51067_1 flye-dairy_70920 s69258.dairy-hifiasm069269l flye-dairy_80507 flye-dairy_71089
VC1703	4	339.8	2039	7938	0.2042	0.992931	s913.goat-hifiasm000950l Roe_deer_Rumen-4__c466 Roe_deer_Rumen-5__c3154 Sheep_Rumen-5__c3490
VC1704	2	37.06	37.06	90.03	0.2827	0.658454	Roe_deer_Rumen-5__c307462 Roe_deer_Rumen-2__c141349
VC1705	2	8.897	8.897	0	0.6899	0.0969654	Yak_Rectum-4__c649584_1 2022NBT-121624_1
VC1706	3	202	606.1	4372	0.1216	0.985452	Goat_Cecum-6__c86346 Goat_Rectum-6__c497909_1 Sheep_Rectum-3__c776137
VC1707	5	14.93	149.3	290.7	0.3318	0.417266	Water_buffalos_Cecum-2__c926300 Water_buffalos_Cecum-4__c427815_1 Water_buffalos_Cecum-5__c553167 Water_buffalos_Colon-2__c331468 Yak_Rectum-4__c901519
VC1708	5	12.89	128.9	648.7	0.1637	0.799737	Dairy_cattle_Rectum-5__c346303 Yak_Rectum-1__c354854 Dairy_cattle_Colon-5__c783956 Dairy_cattle_Colon-6__c296586 Dairy_cattle_Rectum-4__c861923
VC1709	2	7.785	7.785	28.02	0.1956	0.979387	Roe_deer_Rumen-5__c210087 Roe_deer_Cecum-5__c389659
VC1710	3	20.72	62.15	694.3	0.08151	0.985452	Roe_deer_Rectum-4__c29179 Roe_deer_Omasum-3__c160601 Roe_deer_Reticulum-3__c239812
VC1711	33	88.34	46700	22900	0.6705	0	Dairy_cattle_Reticulum-4__c61226 Dairy_cattle_Reticulum-6__c209069 Goat_Ileum-6__c49196 Goat_Jejunum-5__c49617 Roe_deer_Jejunum-1__c54166 Yak_Duodenum-1__c171353 Yak_Duodenum-1__c284020 Yak_Duodenum-3__c101776 Yak_Duodenum-3__c308808 Yak_Duodenum-3__c89131 Yak_Rumen-2__c2015786 flye-dairy_15951 flye-dairy_51588 flye-dairy_58731 flye-dairy_59227 flye-dairy_68480 flye-dairy_69581 flye-dairy_70928 f…
VC1712	2	261.8	261.8	2660	0.0895	0.979387	flye-dairy_51588 flye-dairy_51587
VC1713	9	94	3384	7647	0.3063	0.786612	Roe_deer_Rumen-5__c3492_1 Yak_Rectum-4__c277968 flye-dairy_63820 flye-dairy_71124 flye-dairy_78604 flye-dairy_80861 s73939.dairy-hifiasm073950c s8956.dairy-hifiasm008957l Yak_Duodenum-1__c386071
VC1714	2	4.416	4.416	102.7	0.03973	0.979387	Water_deer_Cecum-2__c129957 s58177.dairy-hifiasm058183l
VC1715	39	117.4	87000	64200	0.575	0	Roe_deer_Rumen-3__c358014 Sheep_Rumen-3__c74546 Water_deer_Abomasum-5__c4933 Goat_Abomasum-3__c393078 Goat_Abomasum-5__c181148_1 contig_154188 Roe_deer_Rumen-1__c10894_1 Sheep_Reticulum-5__c729517_1 Dairy_cattle_Rumen-2__c930344 Goat_Omasum-3__c100945_1 Roe_deer_Reticulum-1__c129206 flye-dairy_69933 Water_deer_Abomasum-1__c167082 Goat_Abomasum-3__c59393_1 Goat_Duodenum-5__c244606 Goat_Rumen-3__c4…
VC1716	2	13.7	13.7	41.22	0.2325	0.979387	Water_buffalos_Reticulum-3__c328874 Yak_Rumen-4__c984869
VC1717	18	109.3	16700	19500	0.4611	0.00281681	Sheep_Rectum-3__c704783 Roe_deer_Abomasum-5__c1128 2022NBT-59644 Goat_Omasum-6__c66946 Goat_Rumen-1__c787030 Roe_deer_Abomasum-3__c664_1 Roe_deer_Reticulum-5__c50511 Roe_deer_Rumen-1__c285305 Roe_deer_Rumen-2__c63785 Sheep_Omasum-2__c220464 Sheep_Rumen-2__c1348463 Water_buffalos_Rumen-1__c514680 Water_deer_Rumen-1__c75 flye-dairy_70762 s6393.dairy-hifiasm006394l s6998.dairy-hifiasm006999l s78098.…
VC1718	4	101.3	607.6	410.1	0.5924	0.0151914	contig_149642 contig_143810 contig_18291 contig_133178
VC1719	3	298.5	895.5	1583	0.3604	0.33126	2022NBT-44054 2022NBT-48229 2022NBT-52202
VC1720	4	135.2	811.2	912.7	0.4684	0.0151914	2022NBT-72833 2022NBT-73837 2022NBT-43662 2022NBT-76090
VC1721	2	85.18	85.18	547.6	0.1338	0.979387	Goat_Cecum-1__c1276 Goat_Cecum-2__c101365_1
VC1722	6	96.35	1445	1033	0.5803	0.00253743	2022NBT-72833 2022NBT-73837 Water_buffalos_Rectum-1__c125419 2022NBT-43662 2022NBT-76090 Water_buffalos_Cecum-1__c232419_1
VC1723	6	127.6	1914	6671	0.2226	0.99588	Yak_Jejunum-5__c154817 Yak_Duodenum-3__c186918 flye-dairy_11440 s29145.dairy-hifiasm029148l s70753.dairy-hifiasm070764l s9538.dairy-hifiasm009539l
VC1724	2	169.7	169.7	2297	0.06867	0.979387	2022NBT-58230 2022NBT-58166
VC1725	6	124.6	1869	5349	0.2586	0.977336	Water_buffalos_Rumen-2__c2674062 Yak_Rumen-3__c362410 s2292.dairy-hifiasm002293l s24408.dairy-hifiasm024410l s57629.dairy-hifiasm057635l flye-dairy_68162
VC1726	4	129.4	776.5	8441	0.08418	0.992931	Sheep_Rectum-2__c257904 Water_deer_Rectum-3__c221771 Yak_Rectum-1__c1112239 Yak_Rectum-4__c76619
VC1727	11	150.7	8287	9950	0.4538	0.000117885	Water_buffalos_Cecum-5__c193911 Water_buffalos_Colon-2__c320644 Water_buffalos_Colon-5__c34352 Water_buffalos_Rectum-2__c173887 Water_buffalos_Rectum-4__c258355 Water_buffalos_Rectum-5__c21 Water_buffalos_Rectum-5__c488250 Water_buffalos_Rectum-5__c762884 Yak_Rectum-3__c401247 Yak_Cecum-3__c747408 Yak_Colon-2__c649586
VC1728	9	139.5	5021	3875	0.5632	0.000286817	Water_buffalos_Rumen-2__c1833901 Water_buffalos_Rumen-3__c1377426 Yak_Jejunum-5__c326279 flye-dairy_43213 flye-dairy_65896 flye-dairy_76965 flye-dairy_81052 s49907.dairy-hifiasm049912l flye-dairy_77099
VC1729	21	94.18	19800	48400	0.29	0.931121	s17262.dairy-hifiasm017263l Sheep_Rumen-2__c2497 s9852.goat-hifiasm010022l flye-dairy_60476 flye-dairy_78363 flye-dairy_59835 flye-dairy_17710 s62087.dairy-hifiasm062093l Sheep_Abomasum-5__c5650 Sheep_Rumen-3__c823598 Dairy_cattle_Duodenum-3__c219361 Water_buffalos_Reticulum-3__c532444 contig_81150 flye-dairy_11202 flye-dairy_21688 flye-dairy_30002 flye-dairy_69393 flye-dairy_72735 flye-dairy_748…
VC1730	2	7.166	7.166	422.7	0.01652	0.979387	flye-dairy_71470 contig_12100
VC1731	28	14.35	5426	3588	0.5982	0	Dairy_cattle_Cecum-2__c144020 Dairy_cattle_Cecum-5__c852161 Dairy_cattle_Colon-2__c1023771 Dairy_cattle_Colon-5__c221840 Dairy_cattle_Rectum-3__c102460 Roe_deer_Colon-1__c243478 Sheep_Cecum-3__c330350 Sheep_Cecum-4__c150395 Sheep_Colon-3__c618653 Sheep_Rectum-3__c339264 Water_buffalos_Cecum-4__c134266 Water_buffalos_Cecum-5__c188375 Water_buffalos_Colon-5__c216404 Water_buffalos_Colon-5__c362884 …
VC1732	3	57.67	173	40.7	0.7874	0.0404278	Water_buffalos_Rectum-1__c758796_1 Yak_Rectum-1__c700012 Yak_Rectum-5__c1019119
VC1733	2	10.81	10.81	227.9	0.04453	0.658454	Sheep_Jejunum-4__c117616 Goat_Ileum-4__c22433
VC1734	2	139.3	139.3	560.7	0.1978	0.979387	Roe_deer_Cecum-2__c469503 Roe_deer_Cecum-5__c97798
VC1735	31	83.25	38700	47600	0.448	0.000601703	Goat_Rumen-3__c2850 Sheep_Ileum-1__c80114 flye-goat_2038 flye-goat_2039 s22639.goat-hifiasm022908l Goat_Rumen-3__c52933 Goat_Rumen-5__c666821 Roe_deer_Jejunum-1__c318 Sheep_Duodenum-5__c121330 Sheep_Duodenum-5__c200 Sheep_Ileum-5__c13964 Yak_Rumen-1__c2051782 flye-goat_16603 flye-goat_20225 flye-goat_21383 s14586.goat-hifiasm014796l_1 s25063.goat-hifiasm025355l_1 Goat_Rumen-6__c210 Goat_Rumen-6__…
VC1736	2	423.7	423.7	5101	0.07664	0.979387	flye-goat_21414 flye-goat_21474
VC1737	17	86.84	11800	3670	0.7613	3.53e-07	flye-goat_19393 s39787.dairy-hifiasm039792l Water_buffalos_Rumen-4__c1088260 flye-dairy_21214 flye-dairy_48775 flye-dairy_48776 s15113.dairy-hifiasm015114l s24478.dairy-hifiasm024480l s38051.dairy-hifiasm038055l s48341.dairy-hifiasm048346c Dairy_cattle_Duodenum-3__c836488 Goat_Jejunum-3__c37384 flye-goat_19391 flye-goat_6177 s3115.dairy-hifiasm003116l s42231.dairy-hifiasm042236l s6952.dairy-hifia…
VC1738	2	6.662	6.662	172.4	0.03639	0.979387	Yak_Rumen-3__c879536 Sheep_Cecum-3__c467026
VC1739	15	45.49	4777	348.8	0.9265	1.68e-06	Bacillus~phage~AP50 2022NBT-125356 Bacillus~phage~Bam35c Bacillus~phage~GIL16c Bacillus~phage~Wip1 Roe_deer_Cecum-2__c2950 Roe_deer_Cecum-3__c477987 Roe_deer_Cecum-5__c549561 Water_buffalos_Colon-2__c650762 Water_deer_Cecum-2__c416292 Water_deer_Cecum-2__c48566 Water_deer_Rectum-1__c39338 Yak_Cecum-1__c683030 Yak_Cecum-5__c419780 Yak_Rectum-4__c655051
VC1740	2	140.5	140.5	682.8	0.1699	0.979387	Roe_deer_Cecum-2__c2950 Water_buffalos_Colon-2__c650762
VC1741	2	371.3	371.3	306.3	0.5447	0.110336	Dairy_cattle_Omasum-5__c955541 Dairy_cattle_Rumen-1__c2416229
VC1742	3	148.5	445.5	360.5	0.5486	0.0404278	Goat_Cecum-2__c86186 Sheep_Colon-1__c723976 Water_buffalos_Cecum-5__c102
VC1743	7	133.1	2794	24500	0.1023	0.999299	Goat_Rumen-3__c56249 flye-goat_21339 s1073.goat-hifiasm001114l s1872.goat-hifiasm001941l s291.goat-hifiasm000299l 2022NBT-906 2022NBT-1224
VC1744	6	54.89	823.3	948.8	0.4615	0.0327761	2022NBT-77195 Water_buffalos_Rectum-5__c75389 Water_deer_Rectum-2__c420256 Yak_Cecum-2__c389656 Yak_Rectum-4__c519871 s20961.dairy-hifiasm020963l
VC1745	2	215.3	215.3	800	0.2113	0.979387	2022NBT-62606 2022NBT-46742
VC1746	4	148.7	892	1769	0.3342	0.332503	2022NBT-82771 2022NBT-87365 2022NBT-90460_1 s27301.dairy-hifiasm027303c
VC1747	4	71.49	429	1169	0.2672	0.843839	2022NBT-64922 Roe_deer_Colon-2__c1159 Goat_Cecum-4__c153256 Goat_Rectum-5__c450524
VC1748	8	41.35	1158	4006	0.2235	0.996297	2022NBT-58056_1 2022NBT-73758 Roe_deer_Cecum-2__c326047_1 Water_buffalos_Rectum-2__c250238 Yak_Cecum-4__c356658 Yak_Duodenum-3__c305646 Yak_Rectum-4__c563506 flye-dairy_58172
VC1749	4	82.89	497.4	1898	0.207	0.992931	Yak_Cecum-4__c356658 Yak_Duodenum-3__c305646 Yak_Rectum-4__c563506 flye-dairy_58172
VC1750	4	228.3	1370	7535	0.1537	0.992931	2022NBT-52290_1 Goat_Rectum-1__c646972 Roe_deer_Rectum-3__c317929_1 Water_buffalos_Cecum-4__c400022
VC1751	21	141.4	29700	27600	0.5178	1.87e-07	2022NBT-5513_1 2022NBT-590_2 Goat_Cecum-2__c436207_1 Goat_Cecum-4__c100_1 Goat_Omasum-4__c197240 Goat_Omasum-4__c376179_1 Roe_deer_Cecum-3__c559611 Roe_deer_Rectum-1__c799082 Roe_deer_Rectum-2__c109622_1 Roe_deer_Rectum-2__c35557 Roe_deer_Rectum-5__c1964 Sheep_Rectum-5__c480351 Water_buffalos_Abomasum-5__c867133_1 Water_buffalos_Colon-3__c104718 Water_buffalos_Rectum-5__c59928 Water_buffalos_Rume…
VC1752	6	368.8	5532	1152	0.8261	0.00253743	Corynebacterium~phage~Adelaide Corynebacterium~phage~Dina Corynebacterium~phage~Lederberg Corynebacterium~phage~SamW Corynebacterium~phage~StAB Corynebacterium~phage~Stiles
VC1753	39	94.82	70300	19300	0.7836	0	contig_49400 Sheep_Ileum-1__c82969 Yak_Duodenum-1__c168712 flye-dairy_25893 flye-dairy_34273 s1675.dairy-hifiasm001676l s2620.dairy-hifiasm002621l s45974.dairy-hifiasm045979l s79649.dairy-hifiasm079662l Goat_Jejunum-3__c27 Yak_Rumen-3__c1144454 contig_169453 flye-dairy_41738 flye-dairy_79073 Goat_Jejunum-2__c214 flye-dairy_37505 Dairy_cattle_Jejunum-6__c219436 Dairy_cattle_Rumen-2__c23018 Sheep_J…
VC1754	3	211.6	634.8	2233	0.2209	0.985452	2022NBT-4178_1 2022NBT-204_2 2022NBT-40583_1
VC1755	2	182.3	182.3	1590	0.1026	0.979387	2022NBT-65367 Goat_Rectum-3__c654594_1
VC1756	4	12.95	77.73	1618	0.04562	0.992931	2022NBT-93261 2022NBT-67275 2022NBT-77129 Roe_deer_Cecum-5__c59129
VC1757	3	136.9	410.8	1546	0.2093	0.985452	Dairy_cattle_Colon-6__c177629 Goat_Colon-6__c434615 Goat_Rectum-1__c261907
VC1758	39	61.53	45600	18400	0.712	0	s913.goat-hifiasm000950l Water_deer_Colon-5__c230625 Roe_deer_Rumen-4__c466 Roe_deer_Rumen-5__c3154 Sheep_Rumen-5__c3490 Goat_Cecum-3__c741205_1 Roe_deer_Cecum-1__c443677 Yak_Colon-4__c621725 Roe_deer_Rectum-1__c3116_1 Water_buffalos_Reticulum-2__c959057 Yak_Cecum-2__c289675 Yak_Rectum-4__c730091 Water_buffalos_Rumen-4__c1279600 Yak_Cecum-1__c1075173 Yak_Cecum-3__c939325 Water_buffalos_Cecum-4__c…
VC1759	7	28.52	598.8	8138	0.06843	0.999299	Roe_deer_Duodenum-2__c297232_1 Roe_deer_Rectum-5__c517975 Roe_deer_Rumen-5__c3493 Sheep_Omasum-1__c999184 contig_84865 s4116.dairy-hifiasm004117l s72067.dairy-hifiasm072078l
VC1760	2	38.84	38.84	1009	0.03693	0.979387	contig_151219 contig_161183
VC1761	2	11.07	11.07	410.7	0.026	0.658454	s10082.dairy-hifiasm010083l flye-dairy_50995
VC1762	3	61.35	184.1	0	0.9684	0.0318013	2022NBT-126358 2022NBT-126266 Water_deer_Rectum-1__c30966_1
VC1763	3	319.7	959.2	1380	0.4091	0.187913	flye-goat_57_1 flye-goat_6735 s1368.goat-hifiasm001418l_1
VC1764	2	220.7	220.7	112.4	0.6548	0.110336	Goat_Ileum-2__c157339 Water_deer_Rectum-1__c212094
VC1765	4	18.8	112.8	83.58	0.5519	0.0151914	Yak_Rumen-1__c2348162 Dairy_cattle_Rumen-3__c1400459 Dairy_cattle_Abomasum-3__c71512_1 Water_buffalos_Rumen-4__c1862188
VC1766	4	37.45	224.7	65.63	0.7532	0.0114181	Dairy_cattle_Reticulum-2__c313427 Sheep_Abomasum-5__c56503 Yak_Reticulum-3__c265414 Goat_Duodenum-5__c52599
VC1767	3	23.09	69.27	768.5	0.08209	0.808633	Goat_Rumen-3__c566290 flye-goat_7126_1 Roe_deer_Rumen-3__c358322
VC1768	36	50.22	31600	57100	0.3564	0.0461186	Sheep_Omasum-2__c736226 Yak_Duodenum-3__c94 Dairy_cattle_Abomasum-3__c713314 Dairy_cattle_Duodenum-2__c532861 Dairy_cattle_Duodenum-3__c156618 Dairy_cattle_Duodenum-5__c409794 Dairy_cattle_Jejunum-6__c102317 Dairy_cattle_Reticulum-2__c62 Dairy_cattle_Reticulum-3__c662601 Dairy_cattle_Rumen-2__c2058539 Water_buffalos_Abomasum-4__c524604 Water_buffalos_Jejunum-5__c27331 Water_buffalos_Reticulum-5__…
VC1769	11	116	6380	9290	0.4066	0.0654841	Sheep_Rumen-3__c823109 flye-dairy_81290 Goat_Rumen-2__c147288 Yak_Rumen-3__c12245 Yak_Rumen-5__c228144 Goat_Rumen-3__c305910 Water_deer_Reticulum-2__c244928 flye-dairy_66858 Sheep_Duodenum-5__c128892 Water_buffalos_Rumen-3__c219119 s41865.dairy-hifiasm041870l
VC1770	65	133.7	278000	114000	0.7084	0	2022NBT-3495_1 2022NBT-58229 Dairy_cattle_Colon-1__c107 Goat_Cecum-2__c510886 Goat_Reticulum-2__c340943_1 Goat_Reticulum-2__c476953 Goat_Reticulum-5__c633621 Goat_Rumen-1__c1721 Goat_Rumen-4__c491963 Goat_Rumen-5__c896582 Roe_deer_Abomasum-1__c2349 Roe_deer_Cecum-4__c1061_1 Roe_deer_Duodenum-1__c242671 Roe_deer_Duodenum-2__c1842_1 Roe_deer_Omasum-3__c129257 Roe_deer_Reticulum-5__c1141 Roe_deer_Ru…
VC1771	7	329.8	6926	16200	0.2996	0.979543	Goat_Ileum-2__c241616 Goat_Jejunum-5__c100 Roe_deer_Jejunum-1__c65 Roe_deer_Jejunum-2__c341 Sheep_Duodenum-1__c150 Sheep_Ileum-4__c242 flye-dairy_58380
VC1772	20	184.5	35100	48500	0.4195	0.000343412	Goat_Omasum-6__c690680 Sheep_Rumen-5__c3543 Water_buffalos_Rumen-1__c1212752_1 s1350.dairy-hifiasm001351l Goat_Abomasum-3__c300190_1 Goat_Ileum-4__c258290_1 Roe_deer_Reticulum-4__c840_1 Water_deer_Rumen-1__c250846 flye-goat_8143_1 Roe_deer_Rumen-2__c1441 2022NBT-6330_1 Goat_Jejunum-1__c325567_1 Roe_deer_Abomasum-1__c1319_1 Roe_deer_Abomasum-5__c1359 Roe_deer_Reticulum-3__c1540 Water_deer_Reticulu…
VC1773	2	485.7	485.7	7190	0.06325	0.979387	Goat_Rumen-3__c342285 Sheep_Rumen-3__c379149
VC1774	2	324.8	324.8	503.2	0.3904	0.658454	Sheep_Rumen-4__c30912 contig_198
VC1775	2	38.36	38.36	1305	0.02847	0.979387	Yak_Rumen-2__c1257427 Roe_deer_Rumen-3__c644
VC1776	44	164.8	156000	78400	0.6652	0	s1563.dairy-hifiasm001564l Roe_deer_Omasum-5__c3338 s4692.dairy-hifiasm004693l Goat_Rumen-5__c606_1 Sheep_Rumen-1__c492 dairy-scaffold_77139 flye-dairy_13147 flye-dairy_15170 flye-dairy_25067 flye-dairy_36217 flye-dairy_41848 flye-dairy_46564 flye-dairy_46565 flye-dairy_56209 s12112.dairy-hifiasm012113l s16545.dairy-hifiasm016546l s17308.dairy-hifiasm017309l s1932.dairy-hifiasm001933l s30780.dair…
VC1777	7	62.57	1314	13900	0.08627	0.999299	Water_deer_Rumen-4__c151199 Goat_Omasum-3__c634368_1 flye-goat_17323 flye-goat_17736 s77098.dairy-hifiasm077110l s45831.dairy-hifiasm045836l flye-goat_281
VC1778	3	182.1	546.4	3529	0.1339	0.985452	Sheep_Rumen-3__c1456696 Goat_Rumen-4__c106798 Sheep_Rumen-2__c280941
VC1779	2	117	117	4376	0.02602	0.979387	2022NBT-69378 Water_buffalos_Rectum-1__c818771
VC1780	2	69.26	69.26	28.87	0.6781	0.110336	2022NBT-127995 Enterobacteria~phage~P4
VC1781	3	19.65	58.95	237	0.1952	0.5	Roe_deer_Rectum-4__c282038 Water_deer_Rectum-4__c290320 Water_deer_Colon-4__c334593
VC1782	2	3.229	3.229	96.57	0.03111	0.979387	Goat_Cecum-6__c140083 s19109.goat-hifiasm019349l
VC1783	3	223.5	670.5	242.5	0.7296	0.0404278	Roe_deer_Rectum-5__c2283 Roe_deer_Cecum-5__c983 Roe_deer_Rectum-5__c853
VC1784	41	60.19	49400	35300	0.5824	0	flye-dairy_56150 Sheep_Abomasum-2__c16616 Yak_Jejunum-5__c24353 Yak_Rumen-3__c218682 Yak_Rumen-5__c109798 contig_107571 flye-dairy_17260 flye-dairy_19602 flye-dairy_19603 flye-dairy_33438 flye-dairy_34483 flye-dairy_39367 flye-dairy_51179 flye-dairy_53242 flye-dairy_56821 flye-dairy_59573 flye-dairy_65824 flye-dairy_65852 flye-dairy_81306 s11873.dairy-hifiasm011874c s15393.dairy-hifiasm015394l s1…
VC1785	4	49.04	294.2	167	0.6271	0.0142148	Water_deer_Cecum-4__c1129 Water_deer_Cecum-4__c14455 Water_deer_Rectum-2__c77245 Roe_deer_Rectum-5__c114134
VC1786	7	56.77	1192	1423	0.4534	0.0276425	2022NBT-56286 2022NBT-59838 2022NBT-66121 2022NBT-24010_1 2022NBT-56273_1 Goat_Rectum-6__c661948_1 Water_deer_Rectum-1__c143246
VC1787	23	79.01	20000	10800	0.6474	5.6e-09	2022NBT-38440 Roe_deer_Jejunum-1__c365 2022NBT-59876 2022NBT-63369 2022NBT-66429 2022NBT-74324 Dairy_cattle_Colon-4__c823777 Dairy_cattle_Duodenum-3__c482 Dairy_cattle_Jejunum-1__c678482 Goat_Jejunum-2__c242138 Roe_deer_Rectum-1__c555366 Roe_deer_Rumen-2__c4152 Sheep_Ileum-1__c40868 Sheep_Ileum-2__c437 Yak_Duodenum-1__c15699 Yak_Duodenum-1__c28769 Yak_Duodenum-3__c138086 flye-dairy_30407 flye-dai…
VC1788	2	13.92	13.92	220.1	0.05848	0.979387	flye-goat_4316 flye-goat_13417
VC1789	8	64.11	1795	4045	0.3065	0.886427	Roe_deer_Colon-4__c576_1 2022NBT-69963 Goat_Rumen-3__c259149 Roe_deer_Cecum-1__c229215_1 Roe_deer_Colon-1__c717832 Roe_deer_Rectum-2__c543 Water_deer_Colon-1__c166183_1 2022NBT-68723
VC1790	6	86.97	1304	1352	0.4888	0.00253743	Roe_deer_Rumen-1__c228952 Goat_Rectum-5__c270552 Goat_Cecum-2__c226666 Water_deer_Rectum-1__c178091 flye-goat_7866 s22116.goat-hifiasm022378l_1
VC1791	2	116.9	116.9	304	0.2751	0.658454	Sheep_Reticulum-2__c150035 Sheep_Rumen-2__c3216
VC1792	2	106	106	316	0.2488	0.658454	2022NBT-23676 2022NBT-57725
VC1793	2	167.9	167.9	305.6	0.3516	0.658454	2022NBT-62971 2022NBT-62896
VC1794	6	119.8	1797	3055	0.3694	0.114883	Sheep_Rumen-3__c330841 Water_buffalos_Rumen-1__c900292_1 Yak_Duodenum-1__c158696 2022NBT-44866 Goat_Colon-6__c769711 flye-dairy_61373
VC1795	4	60.87	365.2	224.2	0.6113	0.030301	Yak_Rectum-3__c662985 Dairy_cattle_Rectum-4__c313436 Goat_Rectum-5__c204857_1 Dairy_cattle_Cecum-2__c1010982
VC1796	3	4.815	14.44	7.106	0.5243	0.0920193	Water_deer_Cecum-3__c532091 Water_deer_Rectum-4__c68853 2022NBT-154948
VC1797	2	84.29	84.29	305.2	0.2142	0.979387	Goat_Abomasum-5__c265558 s4449.goat-hifiasm004557c
VC1798	3	209.6	628.8	5052	0.1106	0.985452	s29407.dairy-hifiasm029410l s72171.dairy-hifiasm072182l s9643.dairy-hifiasm009644l
VC1799	2	115.6	115.6	86.46	0.561	0.110336	2022NBT-132015 Roe_deer_Rectum-5__c2659
VC1800	22	137.1	31700	57400	0.3556	0.183078	Roe_deer_Rumen-5__c4954_1 Sheep_Abomasum-4__c272 Goat_Duodenum-2__c8246_1 Roe_deer_Cecum-4__c2500 Roe_deer_Omasum-4__c3648 Roe_deer_Omasum-5__c197333 Sheep_Abomasum-4__c619898 Sheep_Rumen-1__c216939 Water_buffalos_Cecum-5__c69475 Water_buffalos_Colon-5__c800151 Water_buffalos_Rectum-3__c33 Water_buffalos_Rectum-4__c206418 Water_deer_Omasum-2__c164061 contig_55248 flye-dairy_41174 flye-dairy_45660…
VC1801	2	140.9	140.9	65.82	0.6687	0.110336	Sheep_Rumen-4__c81821 Roe_deer_Rumen-2__c4169
VC1802	2	262.1	262.1	1967	0.1174	0.658454	2022NBT-32431 Roe_deer_Reticulum-4__c415
VC1803	4	154.3	925.5	5219	0.1504	0.992931	2022NBT-37492 2022NBT-67978 Goat_Rectum-1__c618_1 2022NBT-72739
VC1804	12	84.47	5575	7538	0.4244	0.0131147	flye-dairy_22620 flye-dairy_65961 s29628.dairy-hifiasm029631l s46698.dairy-hifiasm046703l flye-dairy_26437 Sheep_Duodenum-1__c459 Sheep_Ileum-5__c69933 flye-dairy_70470 Sheep_Reticulum-3__c59274 s23548.dairy-hifiasm023550l s49511.dairy-hifiasm049516l s85624.dairy-hifiasm085638l
VC1805	3	232.2	696.6	823.2	0.4565	0.0404278	Goat_Jejunum-1__c357886 Roe_deer_Jejunum-2__c11080_1 Roe_deer_Rumen-2__c425125
VC1806	2	316.7	316.7	2746	0.1032	0.979387	contig_133961 contig_160872
VC1807	10	313.2	14100	17100	0.4513	0.000164919	Goat_Abomasum-1__c651805 Roe_deer_Rumen-4__c2501 Sheep_Abomasum-4__c842 Water_buffalos_Rumen-1__c118075 flye-dairy_75814 flye-dairy_77502 flye-dairy_78124 flye-dairy_78620 flye-dairy_80145 flye-goat_6075
VC1808	2	401.2	401.2	2671	0.1304	0.979387	flye-goat_18885 s8994.goat-hifiasm009151l
VC1809	98	45.13	215000	107000	0.666	0	Roe_deer_Rumen-5__c4954_1 Water_buffalos_Rectum-4__c133019 Water_deer_Cecum-2__c387617 Sheep_Abomasum-1__c12451 Sheep_Abomasum-4__c272 2022NBT-742_1 Goat_Cecum-2__c40433_1 Goat_Duodenum-2__c8246_1 Goat_Jejunum-3__c340874 Goat_Omasum-2__c606204 Goat_Reticulum-4__c1148 Goat_Rumen-1__c2356 Goat_Rumen-4__c194645_1 Roe_deer_Cecum-4__c2500 Roe_deer_Colon-2__c1965 Roe_deer_Omasum-3__c153076 Roe_deer_Oma…
VC1810	62	41.01	77600	142000	0.3534	0.0167353	Yak_Rumen-3__c1443785 Sheep_Rumen-5__c969375 contig_65371 flye-dairy_32643 s31792.dairy-hifiasm031795l Yak_Cecum-3__c730005 Yak_Duodenum-1__c123806 Sheep_Ileum-4__c94326 Roe_deer_Jejunum-1__c393 Sheep_Rumen-2__c2497 Yak_Duodenum-1__c296626 Yak_Duodenum-1__c326303 Yak_Duodenum-3__c362685 Yak_Rumen-2__c1660415 Yak_Rumen-5__c604309 contig_27268 flye-dairy_24036 flye-dairy_63304 flye-dairy_63823 flye…
VC1811	2	202.8	202.8	1167	0.1477	0.979387	s12397.goat-hifiasm012586l s16662.goat-hifiasm016885l
VC1812	37	263.8	176000	43200	0.8024	0	contig_27661 s18293.dairy-hifiasm018295c Water_deer_Rectum-4__c145109 flye-dairy_65515 Water_deer_Rectum-1__c354371 Water_deer_Rumen-5__c59415 s11837.dairy-hifiasm011838l Sheep_Ileum-1__c33400 Water_deer_Ileum-2__c54032 Dairy_cattle_Jejunum-2__c1003787 Roe_deer_Colon-2__c1851 Water_buffalos_Rumen-5__c906391 Goat_Ileum-1__c163 Goat_Rectum-1__c230 Roe_deer_Cecum-1__c1116 Roe_deer_Rectum-1__c1144 Sh…
VC1813	6	331.5	4973	7230	0.4071	0.0867427	flye-dairy_46111 flye-dairy_40519 s500.dairy-hifiasm000501l s32122.dairy-hifiasm032125l s3049.dairy-hifiasm003050l s46344.dairy-hifiasm046349l
VC1814	5	217.5	2175	3314	0.3956	0.00609289	Listeria~phage~B025 Listeria~phage~LP-030-2 Listeria~phage~LP-101 Listeria~phage~LP-HM00113468 Listeria~phage~PSA
VC1815	11	80.78	4443	304.9	0.9315	4e-05	Roe_deer_Rumen-1__c228952 Roe_deer_Cecum-3__c138370_1 Roe_deer_Omasum-2__c3167_1 Water_buffalos_Rumen-1__c267405 contig_131117 Goat_Rectum-5__c270552 Goat_Cecum-2__c226666 Roe_deer_Cecum-4__c1692 Water_deer_Rectum-1__c178091 flye-goat_7866 s22116.goat-hifiasm022378l_1
VC1816	9	70.62	2542	3119	0.4476	0.0317081	2022NBT-39037_1 2022NBT-51214 Rhodobacter~phage~RC1 Rhodovulum~phage~RS1 Rhodovulum~phage~vB_RhkS_P1 Sheep_Abomasum-1__c347880_1 Sheep_Duodenum-2__c85179 Sheep_Ileum-3__c179650 Sheep_Jejunum-3__c54066_1
VC1817	22	173.4	40100	40800	0.4955	3.58e-08	2022NBT-42779_1 2022NBT-44439_1 2022NBT-63254 Enterobacteria~phage~HK620 Enterobacteria~phage~ST104 Enterobacteria~phage~Sf101 Enterobacteria~phage~UAB_Phi20 Salmonella~phage~103203_sal5 Salmonella~phage~118970_sal4 Salmonella~phage~P22 Salmonella~phage~SEN22 Salmonella~phage~SPN9CC Salmonella~phage~ST64T Salmonella~phage~UPF_BP1 Salmonella~phage~epsilon34 Salmonella~phage~g341c Salmonella~phage~…
VC1818	2	254.6	254.6	2626	0.08826	0.979387	Bacteriophage~APSE-2 Hamiltonella~phage~APSE-1
VC1819	2	224.7	224.7	1667	0.1185	0.979387	Mannheimia~phage~vB_MhM_3927AP2 Haemophilus~phage~SuMu
VC1820	5	209.1	2091	3390	0.3808	0.338052	Burkholderia~phage~phi1026b Burkholderia~phage~Bcep176 Burkholderia~phage~phi644-2 Burkholderia~phage~phiE125 Burkholderia~phage~KS9
VC1821	3	600	1800	3075	0.3688	0.0318013	Pantoea~phage~vB_PagM_AAM37 Pantoea~phage~vB_PagM_PSKM Xanthomonas~phage~vB_XveM_DIBBI
VC1822	3	356.3	1069	1335	0.4434	0.0404278	Goat_Jejunum-3__c200539 Roe_deer_Rumen-5__c234 flye-goat_21519
VC1823	5	352.3	3523	2657	0.5691	0.00609289	Roe_deer_Cecum-2__c1189 Roe_deer_Rectum-4__c403343 Roe_deer_Reticulum-3__c216_1 Roe_deer_Rumen-4__c2466 Roe_deer_Rumen-5__c4573
VC1824	6	138	2070	4757	0.3027	0.810761	Roe_deer_Omasum-2__c1980 Roe_deer_Reticulum-2__c2128 Sheep_Duodenum-4__c317381 Sheep_Duodenum-5__c65764 Water_deer_Colon-2__c356166 flye-dairy_71585
VC1825	2	37.98	37.98	222.3	0.1437	0.658454	s99772.dairy-hifiasm099791l s44257.dairy-hifiasm044262l_1
VC1826	3	438.6	1316	1133	0.536	0.0382613	Escherichia~phage~D108 Escherichia~phage~Mu Shigella~phage~SfMu
VC1827	10	120.6	5429	5319	0.5042	0.00141364	flye-dairy_22307 flye-dairy_22338 flye-dairy_21862 flye-dairy_21894 flye-dairy_58405 flye-dairy_39021 flye-dairy_47732 flye-dairy_21884 flye-dairy_37917 s75214.dairy-hifiasm075226l
VC1828	3	155.2	465.5	654.8	0.4133	0.191367	flye-dairy_76341 flye-dairy_38354 contig_180826
VC1829	2	317.7	317.7	2313	0.1206	0.979387	contig_38609 contig_87272
VC1830	40	85.49	66700	45100	0.5959	0	2022NBT-67136 Roe_deer_Reticulum-4__c73729 s49573.dairy-hifiasm049578l flye-dairy_81253 flye-dairy_58711 Sheep_Rumen-3__c1265905 contig_173801_1 flye-dairy_79948 flye-dairy_81323 s30781.dairy-hifiasm030784l s32868.dairy-hifiasm032872c Dairy_cattle_Duodenum-3__c756692 Dairy_cattle_Jejunum-1__c87796 Dairy_cattle_Rumen-2__c306 Roe_deer_Omasum-3__c1884 flye-dairy_16027 flye-dairy_18224 flye-dairy_445…
VC1831	11	246.9	13600	23700	0.3645	0.0438841	Goat_Omasum-2__c432_1 Goat_Rumen-5__c1715 Roe_deer_Omasum-2__c2041 Roe_deer_Rectum-1__c2488_1 Roe_deer_Reticulum-1__c192974_1 Roe_deer_Rumen-2__c4094 Sheep_Omasum-2__c966242 Water_buffalos_Omasum-5__c768623 Water_deer_Rumen-4__c183376 Yak_Omasum-4__c398840 Yak_Rumen-2__c1159494
VC1832	3	259.4	778.2	4935	0.1361	0.985452	Goat_Rumen-5__c388690_1 Goat_Rumen-6__c504018_1 Yak_Omasum-2__c875950_1
VC1833	2	372.2	372.2	5445	0.06394	0.979387	Goat_Rumen-5__c665664 Yak_Cecum-2__c13780
VC1834	2	544.3	544.3	3011	0.1529	0.979387	Roe_deer_Abomasum-3__c115721_1 Water_deer_Reticulum-4__c149428_1
VC1835	4	263.1	1579	9233	0.1459	0.969699	Roe_deer_Abomasum-3__c1182 Roe_deer_Rumen-4__c1128_1 Sheep_Omasum-3__c169122 contig_59519
VC1836	3	418.5	1255	5777	0.1784	0.985452	Goat_Abomasum-6__c126937 Sheep_Abomasum-5__c598_1 flye-dairy_80862
VC1837	2	600	600	5873	0.09264	0.979387	Sheep_Omasum-3__c609117 Yak_Reticulum-3__c560519
VC1838	2	278.8	278.8	3398	0.07574	0.979387	Water_buffalos_Reticulum-3__c901227 s5755.goat-hifiasm005876l
VC1839	6	216.2	3243	10200	0.2403	0.984681	Goat_Rumen-5__c388690_1 Goat_Rumen-6__c504018_1 Water_buffalos_Rectum-5__c504911 Yak_Omasum-2__c875950_1 Yak_Rectum-4__c271264 Sheep_Colon-5__c431278_1
[truncated: 2,338 more rows]
