# Supplementary material for: Spatial heterogeneity of viral communities across the gastrointestinal tracts of ruminants
Source: Research Square preprint supplement (doi:10.21203/rs.3.rs-4244627/v1), 2024-04-10
Supplement: Supplementary file 3 [file 20fe8317db3b4c1083726f05.docx]

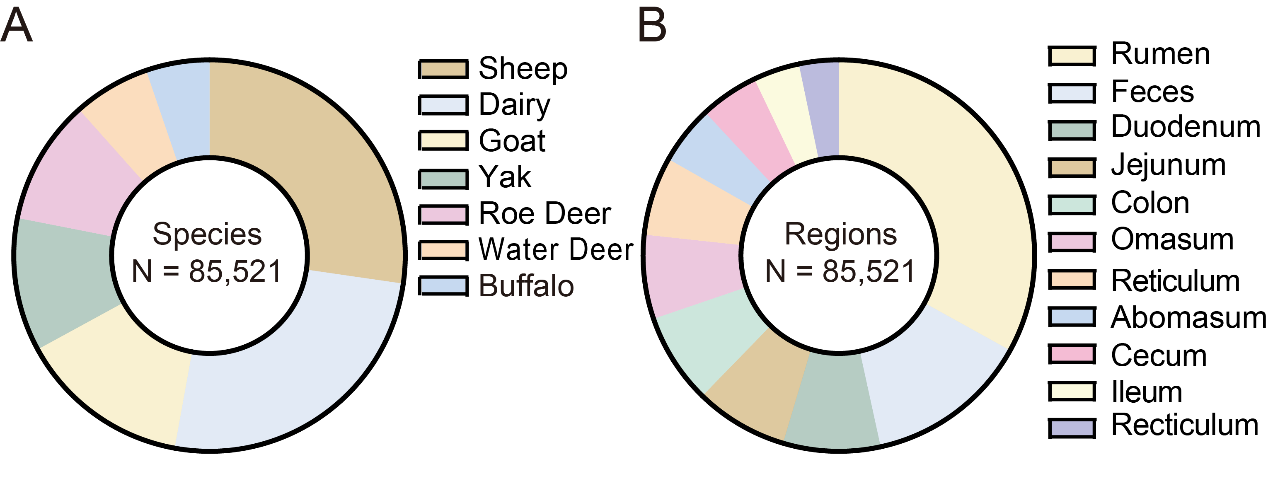
**Fig S1. Ruminant species and GIT region origins of 85,521 viral genomes with completeness exceeding 50%.** A, Proportions of vOTUs identified from the ruminant species; B, Proportions of vOTUs identified at each gastrointestinal region.


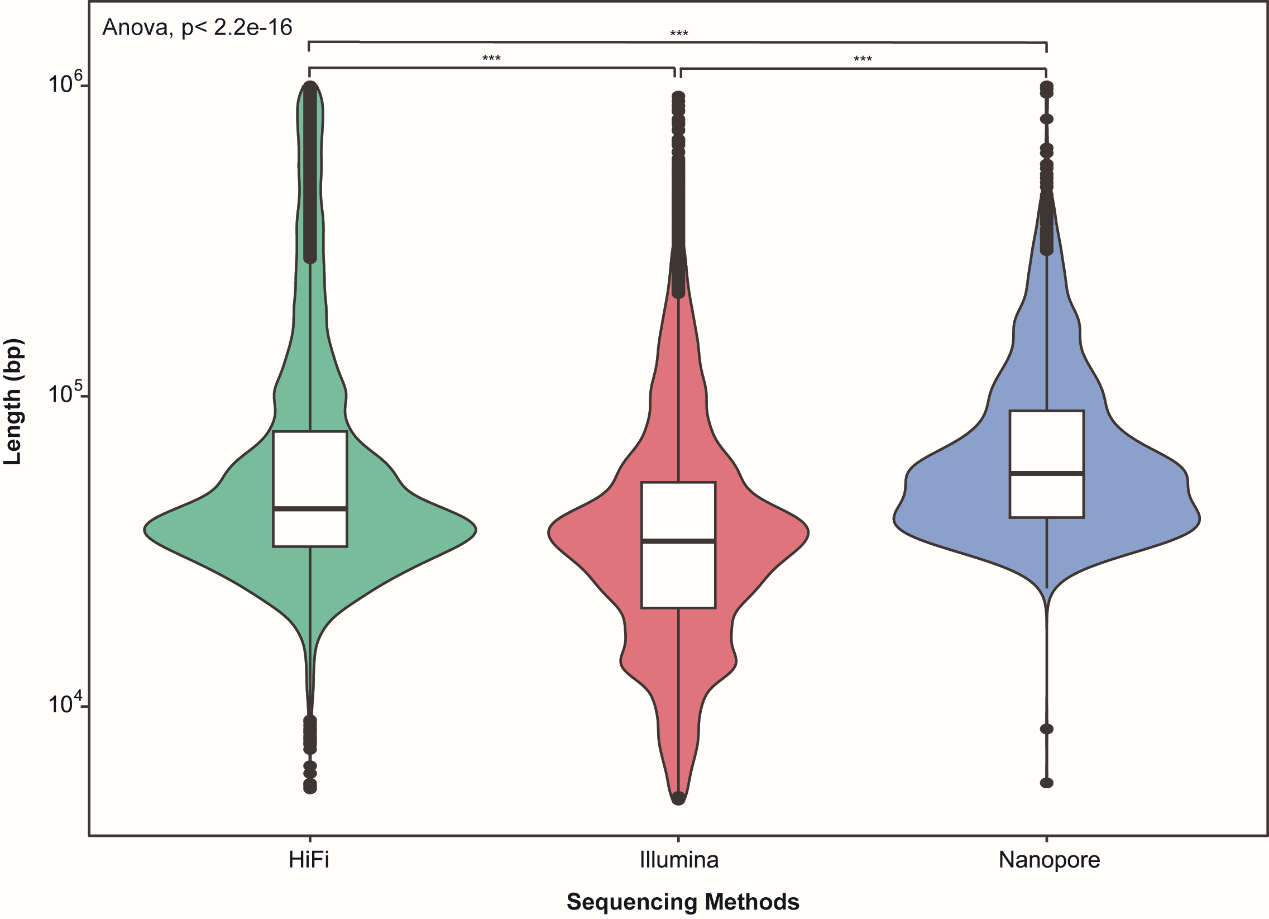


**Fig S2. Comparison of the length of vOTUs sequences obtained from three sequencing methodologies**. The violin plot represents the distribution of lengths of vOTUs sequence from HiFi, Illumina, and Nanopore sequencing methodologies, ranging from 5 kbp to 1000 kbp. *** *p*< 0.001


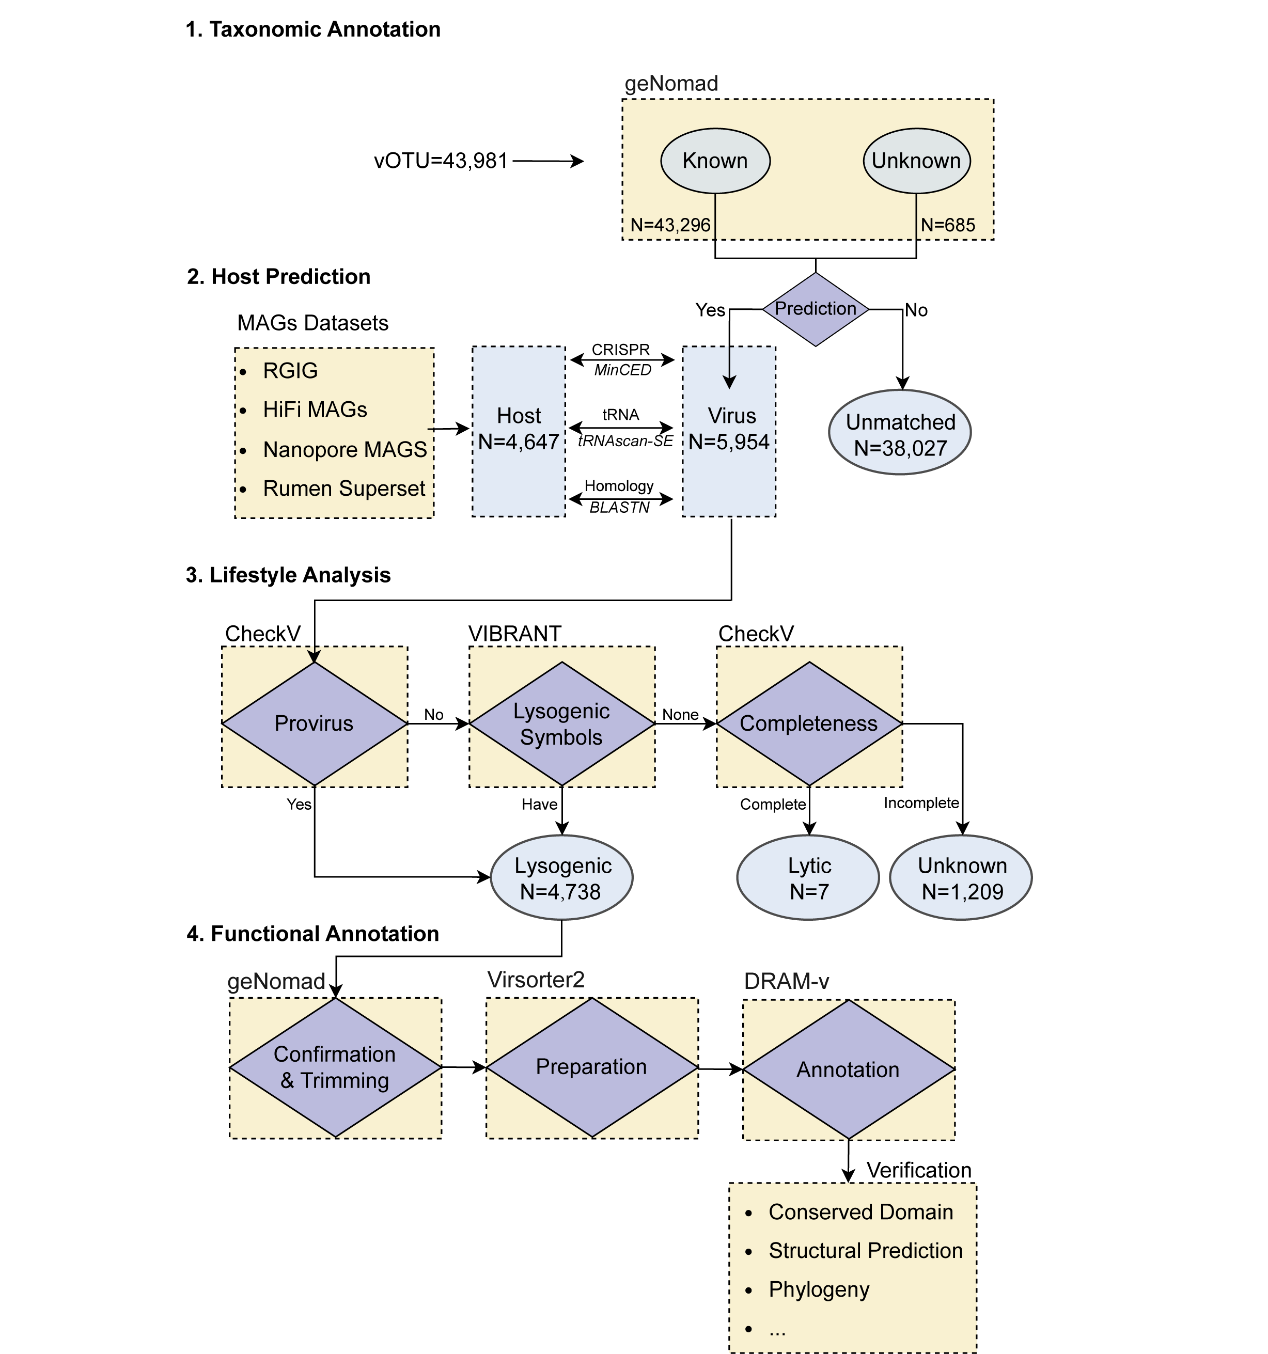


**Fig S3.** **Overview of the process of vOTUs annotation and analysis.** geNomad was used for the taxonomic annotation of 4,3981 vOTUs, together with 685 vOTUs without realm classification. All vOTUs were predicted hosts using three matching methods (CRISPR, tRNA and homology) with the self-constructed MAGs library, resulting in the identification of 4,603 known hosts and 5,954 host-linkage viruses. Lysogenic viruses were detected through signal genes or proviruses from all vOTUs, and lysogenic host-linked viruses were subjected to functional annotation processes, including sequence confirmation and trimming, data preparation, annotation, and verification.

**
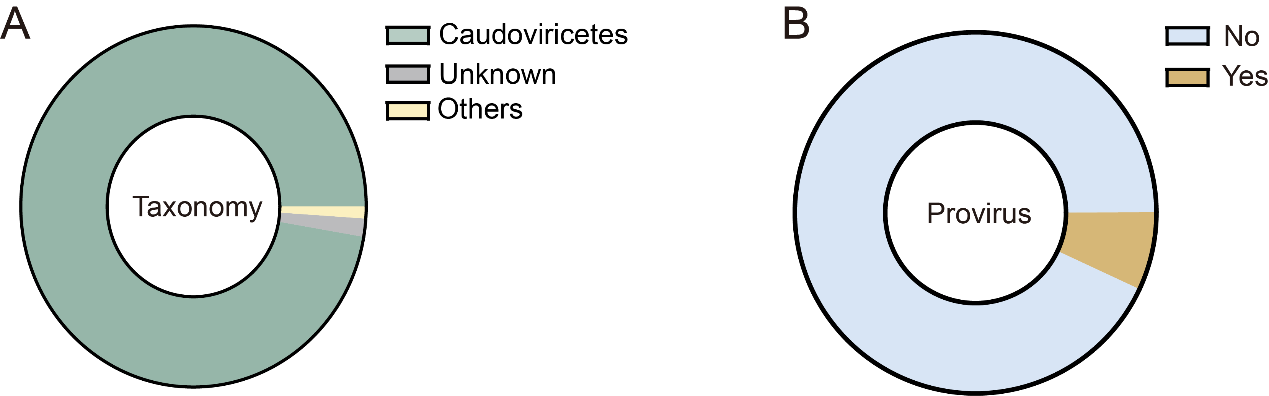
**

**Fig S4. Proportions of** **taxonomically classified and provirus among 43,981 vOTUs in the RGVC.** A, Proportions of taxonomically classified among vOTUs. B, Proportions of provirus among vOTUs.


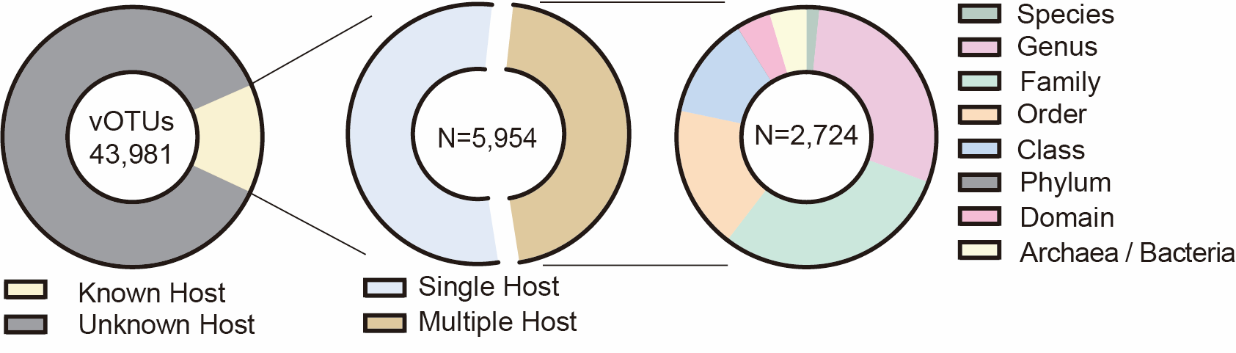


**Fig S5.** **Overview of the matching process between vOTUs and host MAGs.** About 5,954 out of 4,3981 vOTUs were matched with host MAGs (A), in which 2,724 vOTUs had multiple matches (B). C, the range of host range at species, genus, family, order, class, phylum, domain and kingdom levels.

**
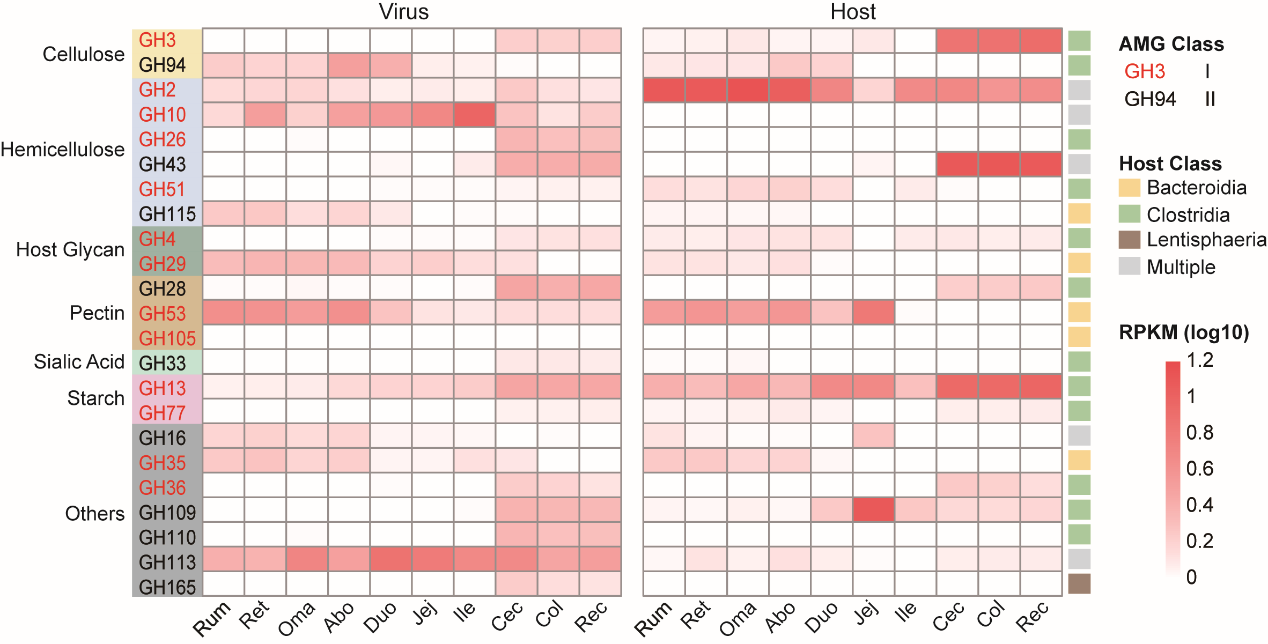
Fig S6.** **Expression of viruses and their corresponding host glycoside hydrolase family (GHs) genes in GIT region of ruminants.** The heatmap illustrates the relative abundance (RPKM) of GHs genes annotated by the CAZyme database. Marking left indicates potential substrates. Class I AMGs with KO annotations are labeled in red, otherwise in black. The bottom color indicates the host class.
