# Supplementary material for: Spatial heterogeneity of viral communities across the gastrointestinal tracts of ruminants
Source: Research Square preprint supplement (doi:10.21203/rs.3.rs-4244627/v1), 2024-04-10
Supplement: Supplementary file 4 [file 2f541066874071212f1d8900.xlsx]

## Sheet: Table S15
Table S15. Relative abundances of vOTUs and hosts grouped by host class level
Host Class	Superkingdom	Virus RPKM	Virus %	Host RPKM	Host %	VHR
Bacteroidia	Bacteria	1347.6	54.4086	173.684	40.8299	7.7589
Clostridia	Bacteria	660.917	26.6842	145.805	34.276	4.53288
Bacilli	Bacteria	84.5319	3.41293	19.574	4.60148	4.31858
Saccharimonadia	Bacteria	55.648	2.24676	19.3787	4.55556	2.87161
Alphaproteobacteria	Bacteria	41.0548	1.65757	6.34227	1.49095	6.47321
Fibrobacteria	Bacteria	38.656	1.56072	4.44714	1.04544	8.69233
Negativicutes	Bacteria	35.1374	1.41866	9.25739	2.17624	3.79561
Kiritimatiellae	Bacteria	30.5619	1.23392	8.03753	1.88947	3.8024
Gammaproteobacteria	Bacteria	28.2978	1.14251	4.75845	1.11862	5.94686
Spirochaetia	Bacteria	27.9358	1.12789	5.49895	1.2927	5.0802
Methanobacteria	Archaea	25.41	1.02592	6.24864	1.46894	4.06648
Verrucomicrobiae	Bacteria	24.2012	0.977111	3.47561	0.817051	6.96314
Synergistia	Bacteria	10.4519	0.421989	1.5214	0.357652	6.8699
Planctomycetia	Bacteria	10.1429	0.409515	1.8914	0.444631	5.36266
Actinomycetia	Bacteria	8.68477	0.350643	4.0144	0.94371	2.1634
Vampirovibrionia	Bacteria	8.63368	0.348581	1.1088	0.260659	7.78648
Campylobacteria	Bacteria	7.56501	0.305434	1.07495	0.2527	7.03756
Coriobacteriia	Bacteria	5.93325	0.239552	1.05296	0.247532	5.63482
JAEDAM01	Bacteria	4.23118	0.170832	0.733966	0.172541	5.76482
Lentisphaeria	Bacteria	3.77833	0.152548	1.79803	0.422683	2.10137
Dehalobacteriia	Bacteria	3.33299	0.134568	0.705358	0.165816	4.72525
Anaerolineae	Bacteria	2.19347	0.0885603	0.448147	0.105351	4.89454
Peptococcia	Bacteria	2.16349	0.08735	1.09579	0.257599	1.97438
Elusimicrobia	Bacteria	2.14069	0.0864292	0.512992	0.120595	4.17294
Desulfovibrionia	Bacteria	2.04651	0.082627	0.721581	0.16963	2.83615
Thermoplasmata	Archaea	1.53278	0.061885	0.484691	0.113942	3.16238
Methanomicrobia	Archaea	1.1692	0.0472061	1.07915	0.253687	1.08345
Endomicrobia	Bacteria	0.963667	0.0389076	0.161295	0.0379174	5.97457
UBA1177	Bacteria	0.603746	0.024376	0.241543	0.0567822	2.49954
Kapabacteria	Bacteria	0.478087	0.0193025	0.0324922	0.00763829	14.7139
UBA5829	Bacteria	0.34045	0.0137455	0.0500191	0.0117586	6.80639
Bradymonadia	Bacteria	0.222844	0.0089972	0.0208491	0.00490123	10.6884
Desulfuromonadia	Bacteria	0.189187	0.00763833	0.114544	0.0269272	1.65165
Microgenomatia	Bacteria	0.0614477	0.00248092	0.0128103	0.00301146	4.79674

## Sheet: Table S16
Table S16. RPKM of host MAGs for each sample grouped by class level
Class	Bacteroidia	Clostridia	Bacilli	Saccharimonadia	Alphaproteobacteria	Negativicutes	Kiritimatiellae	Spirochaetia	Methanobacteria	Synergistia	Thermoplasmata	Methanomicrobia	Others
Dairy_cattle_Rumen-1 RPKM	237.531	96.7096	6.99057	3.7994	1.94403	4.80671	7.2382	3.43135	0.869373	0.145869	0.317573	0	9.91536
Dairy_cattle_Rumen-2 RPKM	236.876	97.9882	7.44326	3.1512	2.15714	6.25615	6.17972	3.85895	1.11901	0.11053	0.252429	0	9.60344
Dairy_cattle_Rumen-3 RPKM	205.278	117.856	10.84	3.87418	2.9318	4.47034	6.57551	7.38031	1.47522	0.131523	0.387218	0	15.345
Dairy_cattle_Rumen-4 RPKM	236.035	96.9746	7.92853	3.01683	1.52203	9.78054	4.61176	4.19567	1.61407	0.130733	0.222955	0	8.17181
Dairy_cattle_Rumen-5 RPKM	226.346	109.419	11.5312	4.60427	2.07029	6.90437	4.96688	3.43266	2.43515	0.110432	0.196438	0	11.4368
Dairy_cattle_Rumen-6 RPKM	227.943	102.638	9.25877	3.40375	4.73563	6.83124	4.61869	5.79103	1.9128	0.168183	0.20682	0	10.0743
Goat_Rumen-1 RPKM	241.428	57.5698	28.3716	5.40487	2.19187	7.69285	3.01142	3.09294	6.50192	26.547	0	0.0118607	6.0611
Goat_Rumen-2 RPKM	188.066	108.063	9.68742	2.95473	0.558648	11.5721	9.24837	2.37433	3.39556	28.2068	0	0	9.65185
Goat_Rumen-3 RPKM	204.908	54.5735	88.0641	6.75477	0.915955	9.17432	8.84545	1.52445	9.40007	27.8141	0.021218	0.00945995	5.93834
Goat_Rumen-4 RPKM	199.577	83.3357	16.2574	4.06488	1.76595	13.6422	13.7737	0.565308	5.23807	19.0337	0	0.0308673	14.2171
Goat_Rumen-5 RPKM	178.282	108.971	20.3627	8.55104	6.46717	17.8404	16.3799	1.01981	1.70171	29.3709	0.103374	0	16.6
Goat_Rumen-6 RPKM	148.892	70.2767	41.9332	3.59908	3.87511	71.7926	8.874	1.13946	12.1465	32.6404	0.0649139	0.0101509	6.31877
Roe_deer_Rumen-1 RPKM	316.178	21.6727	1.85625	0.948889	0.189777	6.42003	0.86216	0.882327	0.496883	1.01504	0.159371	0	1.79185
Roe_deer_Rumen-2 RPKM	327.806	30.7491	10.8099	2.76411	4.7617	1.16209	0.586871	11.5414	0.509224	0.404306	0.129644	0	7.95182
Roe_deer_Rumen-3 RPKM	193.69	16.7082	1.30323	0.203838	4.36347	4.2444	1.24386	2.7878	0.518029	5.22637	0.558164	0	137.046
Roe_deer_Rumen-4 RPKM	347.841	19.6654	1.06846	10.5352	24.7598	2.57276	0.0391269	1.98296	0.422368	0	0	0	7.13786
Roe_deer_Rumen-5 RPKM	142.253	88.8499	13.2053	4.18735	36.0341	2.3034	0.0361166	5.57837	0.886912	0.299338	0.393463	0	103.319
Sheep_Rumen-1 RPKM	184.06	82.0284	18.3357	14.717	2.18929	45.6392	5.06458	3.01307	0.923032	0.0622206	2.40561	0.00918068	26.2793
Sheep_Rumen-2 RPKM	193.692	78.8252	12.6702	4.90637	2.46639	17.6719	8.09319	5.31863	1.61801	0.0562107	1.98792	0.00960204	32.1917
Sheep_Rumen-3 RPKM	165.149	70.1128	17.2379	8.45226	6.34984	35.6908	9.33191	6.09232	1.54471	0.435409	3.84665	0	50.0061
Sheep_Rumen-4 RPKM	194.888	71.1334	30.9173	5.72011	3.77253	6.08162	9.69807	5.82285	1.88421	0.113981	3.20843	0	36.2458
Sheep_Rumen-5 RPKM	187.88	80.0446	29.0076	12.4319	3.30439	22.4781	6.3562	4.77381	2.49034	0.102499	3.20445	0	30.752
Water_buffalos_Rumen-1 RPKM	180.31	151.551	14.1234	16.97	1.49123	6.06363	0.881519	3.49711	7.94367	0.0966699	0.152457	0	7.84116
Water_buffalos_Rumen-2 RPKM	199.935	77.4294	12.436	4.39288	2.97698	3.90067	5.05225	5.75905	1.93958	0.193912	2.40196	0.15263	56.0298
Water_buffalos_Rumen-3 RPKM	214.303	75.7135	20.2002	1.12372	8.01042	6.53202	7.70872	12.9008	2.13331	0.326998	0.708293	0.0577233	50.2888
Water_buffalos_Rumen-4 RPKM	205.252	138.191	4.20807	1.11463	0.904258	2.29363	8.3056	12.0711	3.0592	0.151906	0.0320271	0.494765	26.4083
Water_buffalos_Rumen-5 RPKM	185.457	117.127	18.8802	3.36812	3.22667	2.15534	7.856	14.4123	5.59725	0.600181	1.17456	2.0468	45.7274
Water_deer_Rumen-1 RPKM	318.811	21.5893	2.61416	0.00732445	0.195025	4.93711	2.43899	0.449285	0.240985	1.33896	0.385562	0	3.38449
Water_deer_Rumen-2 RPKM	279.081	42.4111	10.3229	0.110954	0.0828167	14.7247	0.0265999	0.754111	0.567032	0.938148	0.178505	0	6.87305
Water_deer_Rumen-3 RPKM	316.633	30.3707	3.3137	0.404064	0.0239587	8.16603	0.176927	0.207774	0.157078	1.04658	0.088991	0	2.02505
Water_deer_Rumen-4 RPKM	286.954	27.8739	7.19773	0.0393547	0	11.475	0.0122272	0.140176	0.72336	0.79235	0.0508443	0	3.15833
Water_deer_Rumen-5 RPKM	261.441	85.4924	9.90226	0.218271	0	8.23652	0.0483259	3.61879	0.197404	0.372993	0.0744778	0	4.40788
Yak_Rumen-1 RPKM	228.941	43.1988	20.9096	9.2464	13.8253	2.09391	6.27832	11.5223	1.23847	0.203179	0.535116	0.0284343	44.9148
Yak_Rumen-2 RPKM	248.025	31.305	16.2692	2.90551	7.36095	2.20252	7.36192	9.63118	0.47597	0.0606535	0.737617	0	41.1952
Yak_Rumen-3 RPKM	250.674	39.3363	17.2478	2.97759	13.6893	1.08817	10.245	3.8989	0.99719	0	0.920642	0.158459	45.571
Yak_Rumen-4 RPKM	229.504	46.8333	17.3108	3.24532	18.2636	2.43164	7.92775	12.0445	1.19964	0.680686	0.467942	0.0191457	44.0581
Yak_Rumen-5 RPKM	196.753	46.8055	17.648	3.19977	15.0505	0.880902	10.8182	13.0514	3.24843	0.439173	0.456388	0.216053	61.0946
Dairy_cattle_Reticulum-1 RPKM	235.289	79.105	6.66551	2.64198	2.70285	3.88838	14.693	4.19324	0.438765	0.189009	0.556878	0	17.6748
Dairy_cattle_Reticulum-2 RPKM	244.642	70.1099	10.9675	2.1788	2.67156	5.67812	11.9841	3.68246	0.916179	0.0282351	0.334737	0	15.945
Dairy_cattle_Reticulum-3 RPKM	204.505	114.725	27.1607	5.01803	2.81116	6.5723	2.78063	6.61024	5.54144	0	0.165636	0	15.4768
Dairy_cattle_Reticulum-4 RPKM	233.96	88.9406	15.0455	3.67797	1.79123	10.2974	3.33391	4.87889	6.46465	0.112782	0.195815	0	10.4423
Dairy_cattle_Reticulum-5 RPKM	232.767	99.3836	12.6709	4.5779	1.83783	8.46969	4.81498	2.37676	4.35936	0.0292442	0.185469	0	12.6852
Dairy_cattle_Reticulum-6 RPKM	247.012	83.9193	9.33712	2.86437	5.68516	7.5801	6.7207	2.59968	3.27354	0.223982	0.299946	0	10.2187
Goat_Reticulum-1 RPKM	235.377	66.935	28.6675	4.84712	2.2483	9.0455	3.01068	3.93847	7.41771	20.9306	0	0	7.37176
Goat_Reticulum-2 RPKM	217.992	82.6647	24.8914	4.17652	0.975265	7.63354	2.65424	4.71721	1.65388	21.7807	0	0.0161751	7.41259
Goat_Reticulum-3 RPKM	198.044	69.7716	86.5686	7.54045	0.947414	8.02081	7.32524	2.43089	14.3886	14.3802	0.0913698	0	8.51986
Goat_Reticulum-4 RPKM	196.909	93.4289	16.5784	4.61096	1.90615	13.5742	11.5124	0.868043	3.91313	15.4402	0	0.0171182	14.2792
Goat_Reticulum-5 RPKM	152.071	105.414	17.8086	5.84703	7.19197	24.8213	10.1762	0.831114	1.56295	43.9837	0.063167	0	22.2605
Goat_Reticulum-6 RPKM	205.173	76.7774	32.1886	6.38048	4.66015	38.3482	8.74152	1.53704	2.81761	5.43573	0	0.0169642	14.9079
Roe_deer_Reticulum-1 RPKM	324.334	22.2213	1.73229	0.742421	0.63213	5.06518	0.801052	0.721452	0.120018	1.38776	0.315567	0	2.10926
Roe_deer_Reticulum-2 RPKM	313.03	31.6535	12.8179	3.26838	4.46998	1.25801	0.567973	14.6834	0.575863	0	0.0600819	0	10.2949
Roe_deer_Reticulum-3 RPKM	187.181	18.0135	0.835773	0.18957	6.73808	3.77595	2.06148	3.5768	0.63427	5.07422	0.959198	0	145.985
Roe_deer_Reticulum-4 RPKM	347.782	22.3501	1.23864	13.9091	29.3383	2.70881	0.0434313	2.41452	0.373262	0	0	0	6.62401
Roe_deer_Reticulum-5 RPKM	97.5845	57.2793	9.95403	2.42114	22.8359	2.11939	0.0352649	5.96073	0.721302	0	0.179989	0	183.555
Sheep_Reticulum-1 RPKM	187.92	92.9467	21.7472	15.5505	0.506589	47.1065	3.19506	1.42641	2.72078	0	2.77151	0	8.92291
Sheep_Reticulum-2 RPKM	215.514	68.7083	8.40377	4.22533	1.81724	8.36938	8.27815	3.98469	0.772551	0.0786755	1.71425	0	24.0717
Sheep_Reticulum-3 RPKM	144.645	61.0932	17.1562	8.02619	2.44371	126.314	6.7472	2.61073	2.52351	0.577116	3.08579	0	12.7386
Sheep_Reticulum-4 RPKM	210.547	62.6674	37.901	5.80617	3.45751	3.2414	6.8207	6.68657	1.00418	0.0211723	1.70692	0	27.1463
Sheep_Reticulum-5 RPKM	183.378	83.2593	18.2467	12.1638	0.904137	65.8195	4.722	1.62632	6.55359	0.0767158	2.32928	0	9.55191
Water_buffalos_Reticulum-1 RPKM	204.91	116.677	10.9466	9.55576	5.21565	12.1567	2.95221	4.71802	2.55569	0.245926	0.0493169	0	15.2274
Water_buffalos_Reticulum-2 RPKM	213.663	71.7426	11.1596	3.52398	1.88258	5.55796	4.41445	5.4981	1.02655	0.116096	1.65669	0.122567	46.9039
Water_buffalos_Reticulum-3 RPKM	233.904	63.0598	21.1408	1.11762	8.03791	5.1491	7.77017	11.2128	0.846652	0.234374	0.43775	0.0582207	45.4588
Water_buffalos_Reticulum-4 RPKM	204.979	131.046	3.32874	1.49318	0.735898	2.32966	7.14781	12.6829	3.15063	0.275193	0	0.229976	35.0964
Water_buffalos_Reticulum-5 RPKM	195.77	116.163	15.1393	2.96746	2.99496	2.2461	9.73177	12.1987	4.9252	0.685188	0.812213	1.27281	40.9983
Water_deer_Reticulum-1 RPKM	290.612	36.7878	8.78588	0.102118	0.100231	10.1841	0	0.696027	0.633141	0.957957	0.195562	0	6.70135
Water_deer_Reticulum-2 RPKM	321.497	32.5244	2.13082	0.1474	0.0235112	4.11743	0.0794611	0.122897	0.0881033	1.12228	0.136972	0	3.04712
Water_deer_Reticulum-3 RPKM	324.701	25.2866	2.96991	0.466213	0.0243254	5.95404	0.0538985	0.260756	0.146558	1.00301	0.0519746	0	1.90837
Water_deer_Reticulum-4 RPKM	289.777	25.0852	6.37448	0.0387988	0	8.9125	0	0.136187	0.904536	0.708655	0.0505906	0	3.14054
Water_deer_Reticulum-5 RPKM	280.13	66.9185	7.80909	0.0595518	0	6.90625	0.0910817	3.88255	0.153175	0.522056	0.0776178	0	7.4992
Yak_Reticulum-1 RPKM	242.76	33.1379	20.9055	8.80849	16.1288	2.20728	7.16124	9.01495	1.03767	0.205659	0.652545	0.036715	41.697
Yak_Reticulum-2 RPKM	253.027	26.5992	16.2305	2.6629	5.79959	1.74924	6.6632	10.2522	0.377358	0.0321713	0.782868	0	42.1632
Yak_Reticulum-3 RPKM	248.967	37.8548	19.6464	2.95655	16.9878	1.14396	12.2484	4.63184	1.10142	0	0.717631	0.162253	45.2576
Yak_Reticulum-4 RPKM	246.657	52.3588	10.8165	1.23117	13.2509	2.44598	5.37366	7.85922	1.03667	0.155097	0.608037	0	34.1397
Yak_Reticulum-5 RPKM	215.118	55.8707	18.2346	1.66913	17.042	2.66269	11.4387	5.22664	2.99654	0.131341	0.653425	0.123557	37.4212
Dairy_cattle_Omasum-1 RPKM	226.994	110.012	7.00602	5.28545	2.3119	6.83203	4.86766	3.31913	1.03965	0.0364836	0.283738	0	10.543
Dairy_cattle_Omasum-2 RPKM	204.202	126.892	7.38659	3.82781	3.60353	6.21379	7.65786	7.11266	1.92563	0	0.295947	0	11.9095
Dairy_cattle_Omasum-3 RPKM	192.8	126.268	9.06226	4.91227	3.95689	5.15929	8.68522	7.04888	1.78322	0.0954613	0.440513	0	18.5786
Dairy_cattle_Omasum-4 RPKM	206.601	129.136	6.19307	3.78751	2.35535	7.58254	4.62909	8.49671	0.964657	0	0.527544	0	9.50472
Dairy_cattle_Omasum-5 RPKM	198.959	125.343	10.1988	6.16086	2.9576	7.16297	5.64266	6.46707	1.46174	0	0.412004	0	20.3375
Dairy_cattle_Omasum-6 RPKM	205.927	114.775	10.1069	3.33156	7.0366	5.50043	7.76142	10.6083	1.54202	0.132649	0.797669	0	14.5932
Goat_Omasum-1 RPKM	218.547	102.578	15.3432	4.89962	1.46372	5.69299	1.92786	6.65737	1.16101	5.30775	0.225598	0	9.94943
Goat_Omasum-2 RPKM	223.512	99.8135	9.79651	7.12643	1.57829	7.70304	3.71138	2.84294	5.15506	3.10814	0.0341622	0	12.2368
Goat_Omasum-3 RPKM	227.797	79.4289	20.429	4.64377	0.976279	9.331	4.30918	1.54854	4.19186	3.80945	0.757427	0	9.23906
Goat_Omasum-4 RPKM	208.206	109.4	11.1115	6.65456	1.69054	12.719	3.12413	1.44697	1.43627	3.82734	0	0.0181973	14.6376
Goat_Omasum-5 RPKM	177.846	126.137	9.68388	10.3239	9.36354	18.5182	4.61127	2.38193	8.98372	11.1948	0.309103	0	18.5952
Goat_Omasum-6 RPKM	226.241	91.4982	10.735	8.43632	5.38527	10.45	3.52213	2.94857	2.72402	2.4009	0.380777	0	13.3614
Roe_deer_Omasum-1 RPKM	321.969	33.1545	1.80903	1.61047	1.09093	2.40445	1.63582	1.32873	0.257127	0.522893	0.155095	0	4.01881
Roe_deer_Omasum-2 RPKM	244.442	63.2443	13.2948	3.11733	2.33369	2.76277	0.758523	22.8258	1.54736	0	0.20427	0	18.6391
Roe_deer_Omasum-3 RPKM	160.256	27.5414	0.998658	0.225949	8.57778	3.13459	2.42227	3.979	0.670972	1.6618	0.828332	0	167.633
Roe_deer_Omasum-4 RPKM	274.364	65.5361	2.3688	18.2905	11.2326	11.0097	0.137303	2.12586	1.2112	0	0	0	8.71304
Roe_deer_Omasum-5 RPKM	121.04	59.652	16.5929	3.43773	13.0567	4.17522	0.0561277	5.29457	0.945576	0	0.0939228	0	157.038
Sheep_Omasum-1 RPKM	217.034	95.0209	18.7925	14.8093	0.618668	17.5186	4.41521	0.913751	0.746633	0.0493749	3.99647	0	8.24129
Sheep_Omasum-2 RPKM	207.172	103.557	10.8008	4.35261	0.573438	15.1746	3.3285	1.18917	6.52286	0.0570229	3.62349	0	10.1982
Sheep_Omasum-3 RPKM	196.484	84.1905	13.7358	10.0078	1.37285	45.9005	4.00841	2.49664	1.56065	0.0942406	5.72033	0	8.57899
Sheep_Omasum-4 RPKM	215.181	92.3722	22.3695	6.6153	0.559754	5.12215	3.28215	1.37023	3.23588	0.0518643	3.38522	0	8.80628
Sheep_Omasum-5 RPKM	216.773	87.3471	21.9437	16.2275	0.766361	11.5059	4.35461	1.0506	1.4629	0.0459197	3.78658	0	15.1826
Water_buffalos_Omasum-1 RPKM	212.317	123.367	11.6719	11.3111	1.20981	2.86288	1.75118	4.32119	1.84155	0.03399	0.0408504	0	9.46485
Water_buffalos_Omasum-2 RPKM	222.024	67.1072	7.12606	4.10155	1.7178	4.396	5.35738	4.1862	0.293488	0	2.98835	0.034813	46.4821
Water_buffalos_Omasum-3 RPKM	240.282	79.8072	6.76431	0.924799	3.76742	7.32158	4.54512	6.74327	0.354184	0.0919324	0.795455	0	30.199
Water_buffalos_Omasum-4 RPKM	181.414	161.353	2.55536	1.2549	1.44538	2.69812	6.97614	8.15038	8.4516	0.119018	0.113747	0.152326	28.8594
Water_buffalos_Omasum-5 RPKM	206.59	115.564	8.84388	2.68106	1.59438	1.68311	3.88409	11.1805	3.38777	0.526674	0.512181	0.50756	36.8898
Water_deer_Omasum-1 RPKM	326.46	26.398	4.95625	0	0.0586231	2.29146	1.53565	1.4103	0.205395	0.825422	0.190965	0	4.10284
Water_deer_Omasum-2 RPKM	325.651	27.1905	3.90928	0.175304	0.0409506	9.46629	0.270325	0.929759	0.384238	0.523339	0.0877366	0	4.37359
Water_deer_Omasum-3 RPKM	327.773	25.677	2.73277	0.458136	0.0294328	5.39211	0.0513334	0.22251	0.0603549	1.11537	0.02894	0	1.91657
Water_deer_Omasum-4 RPKM	305.74	18.9104	6.58048	0.0482124	0	6.64523	0	0.237312	0.611563	0	0.0476261	0	3.59555
Water_deer_Omasum-5 RPKM	305.862	48.3427	13.3411	0.0771164	0	1.80286	0	3.73856	0.0951704	0.551748	0.0652665	0	5.73422
Yak_Omasum-1 RPKM	252.917	32.1183	17.8839	8.82667	16.2208	1.41624	5.52431	6.42301	0.940821	0.147329	0.748636	0	39.6161
Yak_Omasum-2 RPKM	259.56	25.2679	12.3971	2.58716	6.80989	0.804298	5.14728	9.41155	0.331453	0	0.926512	0	43.9593
Yak_Omasum-3 RPKM	227.047	59.1349	13.3926	2.61574	14.3663	1.25214	14.723	5.71191	1.213	0.0338152	0.918733	0.16775	48.9788
Yak_Omasum-4 RPKM	239.127	46.3165	10.8297	2.85423	14.9731	1.30348	6.75929	10.8132	1.03385	0.255513	0.703222	0	43.5437
Yak_Omasum-5 RPKM	197.947	49.4404	16.7024	3.17387	17.922	0.757954	13.0057	9.93545	3.78383	0.0950078	0.902195	0.22883	61.4054
Dairy_cattle_Abomasum-1 RPKM	205.901	109.611	4.75341	3.30494	2.3545	5.66313	10.603	5.88257	0.28885	0.0421454	1.36295	0	25.8628
Dairy_cattle_Abomasum-2 RPKM	148.038	177.649	6.54233	4.22796	3.91817	9.97916	11.3966	5.37882	0.608559	0.0543778	1.21072	0	16.0684
Dairy_cattle_Abomasum-3 RPKM	182.737	131.469	7.27708	4.27561	2.83535	7.74965	11.1044	7.51069	0.572212	0.130737	0.7418	0	22.99
Dairy_cattle_Abomasum-4 RPKM	232.72	85.0667	6.15199	2.92418	2.16787	6.3427	5.78299	7.28311	0.0607897	0	1.79316	0	16.933
Dairy_cattle_Abomasum-5 RPKM	206.254	113.086	5.39729	5.167	3.14705	8.44243	8.63091	5.12895	0.284146	0.0308044	1.40415	0	20.9958
Dairy_cattle_Abomasum-6 RPKM	211.104	105.401	4.05402	2.85469	5.63479	6.91958	13.7937	3.90734	0.268371	0.274945	1.47615	0	27.9419
Goat_Abomasum-1 RPKM	228.604	77.6687	11.6943	2.33246	3.5918	3.47019	8.81	10.3064	0.6328	8.64807	0.213721	0.089095	16.7221
Goat_Abomasum-2 RPKM	174.909	57.4103	7.03939	1.36599	2.78455	3.0633	11.033	5.16129	1.1889	7.48558	0.836138	0.173786	159.203
Goat_Abomasum-3 RPKM	209.088	77.5671	30.8385	2.75136	1.63551	9.97694	9.93455	5.9475	1.00567	6.13421	0.405354	0.124448	14.8167
Goat_Abomasum-4 RPKM	195.916	53.1829	8.02142	2.56524	4.2297	5.41325	16.8499	2.34813	0.748686	16.3857	0	1.44264	117.219
Goat_Abomasum-5 RPKM	139.216	148.55	9.96616	3.92436	8.00746	24.5882	15.1426	2.4598	1.9135	18.7872	0.3012	0.0319802	21.3015
Goat_Abomasum-6 RPKM	222.302	63.7977	13.5257	5.1567	13.2006	7.39834	19.3894	3.70528	1.46636	8.58774	0.705976	0.511367	37.1332
Roe_deer_Abomasum-1 RPKM	310.77	53.1788	1.15572	0.965657	2.39898	1.38026	0.84824	0.33134	0.144309	0.807877	0.520103	0	5.28953
Roe_deer_Abomasum-2 RPKM	271.734	45.2653	3.38358	1.55681	1.70423	2.50456	0.161524	7.64444	0.765446	0	0	0	21.3164
Roe_deer_Abomasum-3 RPKM	227.962	24.9151	1.52714	0.172574	3.22148	4.24777	3.0734	1.68019	0.835373	2.83239	0.446458	0	95.8086
Roe_deer_Abomasum-4 RPKM	299.201	45.0288	1.62617	11.7231	16.0681	7.69444	0.0698115	0.548871	0.438389	0	0	0	5.39007
Roe_deer_Abomasum-5 RPKM	163.211	60.7663	7.85649	3.02505	7.46839	8.56517	0.0836328	1.80679	0.26297	0	0	0	119.665
Sheep_Abomasum-1 RPKM	166.991	79.3901	30.4332	57.4875	12.4051	19.1656	3.21868	2.44383	8.36135	0.0404721	3.90098	0.0223273	25.9122
Sheep_Abomasum-2 RPKM	161.676	77.7966	38.8642	72.6299	4.35045	6.98444	2.27149	3.17529	17.2379	0.0308991	1.41076	0	38.0099
Sheep_Abomasum-3 RPKM	99.523	67.786	97.6648	17.965	27.241	17.4765	1.26088	0.958983	24.8215	0	1.46427	0	25.5276
Sheep_Abomasum-4 RPKM	214.158	63.4932	28.7829	11.9593	4.79069	5.05069	5.41634	2.69454	3.27975	0.0266607	2.06932	0	24.1404
Sheep_Abomasum-5 RPKM	210.474	68.3322	15.4273	19.6092	4.81328	12.9609	4.44212	2.23272	3.79568	0	3.34941	0	32.3166
Water_buffalos_Abomasum-1 RPKM	143.407	176.631	11.7238	13.6744	2.28334	13.5246	4.67839	5.19283	2.85991	0.242518	0.134739	0	17.1498
Water_buffalos_Abomasum-2 RPKM	231.114	73.6529	4.91627	1.078	2.55991	3.72767	4.35804	4.02128	0.835802	0.116559	1.12476	0.235173	35.1889
Water_buffalos_Abomasum-3 RPKM	229.382	84.7524	6.30353	0.929511	3.75556	16.0185	3.23178	7.39535	0	0	0	0	40.0045
Water_buffalos_Abomasum-4 RPKM	191.133	157.868	4.14768	1.05158	0.931571	4.68687	8.99794	7.59409	0.935242	0.304035	0.176835	1.60928	33.2159
Water_buffalos_Abomasum-5 RPKM	189.993	125.385	6.76275	1.81249	1.3575	5.77171	4.85819	6.67844	1.31034	1.07754	0.460517	0.549597	41.7298
Water_deer_Abomasum-1 RPKM	319.183	22.2979	2.13604	0.0702803	0.107338	3.4173	1.56647	0.460943	0.226381	1.12387	0.465273	0	5.1926
Water_deer_Abomasum-2 RPKM	328.241	27.9037	1.89935	0.098313	0.0236191	3.10158	0.0462199	0.116031	0	1.14985	0.141385	0	2.59289
Water_deer_Abomasum-3 RPKM	303.378	27.234	5.08464	0.0647068	0.0981197	12.5454	0.263533	0.637301	0.349548	1.09094	0.368529	0	5.09778
Water_deer_Abomasum-4 RPKM	294.608	19.4593	12.6366	0	0	8.86221	0.244797	0.21008	0.142354	0	0.574137	0	4.99358
Water_deer_Abomasum-5 RPKM	287.426	62.2803	5.5814	0.107816	0	2.83138	0	3.86334	0.073289	0.40166	0.227414	0	6.24435
Yak_Abomasum-1 RPKM	233.399	50.0961	25.3643	4.3145	19.0743	3.73719	7.3828	4.67681	2.32129	0.386957	0.974192	0.0428151	32.9619
Yak_Abomasum-2 RPKM	247.845	39.7506	12.9524	1.90405	6.68661	1.99058	7.19194	6.90491	0.477783	0.0392186	1.00242	0	39.2973
Yak_Abomasum-3 RPKM	231.151	69.5769	12.0061	0.809265	9.29805	5.39847	8.02249	4.11232	1.20148	0.0659961	0.563042	0.0560604	32.3134
Yak_Abomasum-4 RPKM	207.19	37.9493	100.323	1.73526	16.3031	0.762639	3.88199	8.35985	0.307365	0	0.319475	0	43.277
Yak_Abomasum-5 RPKM	188.338	50.6966	36.175	2.08196	30.5474	1.45636	23.7655	4.8244	6.04574	0.152422	0.332173	0.126498	46.1162
Dairy_cattle_Duodenum-1 RPKM	20.443	207.005	17.7679	34.5462	16.9675	0.778897	66.7784	0.997882	20.6442	0	0.186292	0	17.1395
Dairy_cattle_Duodenum-2 RPKM	47.4816	252.336	28.6656	21.8072	7.28583	8.5584	33.3887	1.17107	7.68355	0	0.389821	0	20.7631
Dairy_cattle_Duodenum-3 RPKM	25.3126	267.061	30.0766	36.9456	11.9319	0.656494	38.7849	1.65913	18.6761	0	0	0	15.9493
Dairy_cattle_Duodenum-4 RPKM	62.3581	310.066	8.89372	11.1924	3.4299	10.9791	2.8699	1.97565	1.73047	0.0603769	1.09516	0	12.3201
Dairy_cattle_Duodenum-5 RPKM	76.7934	270.33	18.8917	17.5351	3.81617	9.50671	8.54399	3.28563	3.92818	0.0916813	0.900506	0	16.2621
Dairy_cattle_Duodenum-6 RPKM	15.926	233.023	17.8679	23.7373	16.9026	1.50768	51.149	2.93693	21.8969	0	0	0	30.3094
Goat_Duodenum-1 RPKM	10.5716	118.741	53.2819	119.21	0.763791	3.09438	14.6222	0.767645	38.4749	4.26691	0	0	80.3928
Goat_Duodenum-2 RPKM	26.09	190.017	20.2463	129.815	2.0348	4.37821	5.61603	0.642628	40.5061	1.25773	0.805779	0	176.747
Goat_Duodenum-3 RPKM	16.5377	99.8957	47.4783	196.17	1.11859	7.98205	47.0088	0.977839	78.5592	11.9426	0	0	27.7553
Goat_Duodenum-4 RPKM	142.604	82.0816	60.079	6.4466	0	32.9153	11.0918	0	13.3008	19.8584	0	0	9.64166
Goat_Duodenum-5 RPKM	156.651	133.572	15.046	4.44534	9.03627	13.8201	15.4807	2.86461	0.983527	22.2577	0.14746	0.0353631	23.7695
Goat_Duodenum-6 RPKM	89.4277	119.438	11.8132	11.4113	1.72925	19.3819	12.4331	2.84833	1.59949	2.16175	0	0	59.1667
Roe_deer_Duodenum-1 RPKM	314.311	47.9566	0.869626	0.791189	2.90406	1.28213	0.121163	0.299169	0.160462	0.940893	0.561077	0	21.305
Roe_deer_Duodenum-2 RPKM	169.803	164.709	14.3175	15.7276	0.399062	4.87254	0	5.48848	0.78589	0	0	0	8.74189
Roe_deer_Duodenum-3 RPKM	131.849	39.5463	0	0	0	21.4692	16.1817	0	0	0	0	0	92.5735
Roe_deer_Duodenum-4 RPKM	0	0	0	0	0	0	0	0	0	0	0	0	142.645
Roe_deer_Duodenum-5 RPKM	0	25.7815	0	0	0	0	0	0	0	0	0	0	118.671
Sheep_Duodenum-1 RPKM	8.59554	86.6939	107.703	299.739	20.4704	13.2497	0.597657	1.43657	30.6564	0	0	0	32.6727
Sheep_Duodenum-2 RPKM	6.71521	111.442	81.6901	154.143	47.0016	9.47113	0.308658	1.09659	14.7901	0	0	0.0213473	25.9564
Sheep_Duodenum-3 RPKM	38.4752	223.103	44.8545	48.6646	1.96583	30.2442	7.28368	1.7357	4.01949	0.0902698	0.326239	0.00949247	10.3044
Sheep_Duodenum-4 RPKM	4.44527	170.119	79.859	184.202	18.8263	1.11489	2.38494	2.78463	13.6176	0	0	0	18.5756
Sheep_Duodenum-5 RPKM	24.2684	57.3294	161.057	139.384	21.4421	8.21076	2.63129	4.81419	24.0632	0	0	0	10.8565
Water_buffalos_Duodenum-1 RPKM	398.24	0	0	145.524	0	0	0	0	0	0	0	0	0
Water_buffalos_Duodenum-2 RPKM	0	215.557	33.5811	0	0	29.4542	51.3333	0	0	0	0	0	27.2528
Water_buffalos_Duodenum-3 RPKM	0	0	0	0	0	360.415	0	0	0	0	0	0	0
Water_buffalos_Duodenum-4 RPKM	0	86.9022	1.50156	1.96436	0	0	108.285	0	15.5784	1.97747	0	0	99.9558
Water_buffalos_Duodenum-5 RPKM	0	299.861	0	0	0	251.77	0	0	0	0	0	0	0
Water_deer_Duodenum-1 RPKM	157.903	191.504	0	0	0	0	0	0	0	0	0	0	0
Water_deer_Duodenum-2 RPKM	302.445	16.8698	8.22049	0	0	7.40092	0	0	0	0	0	0	15.5527
Water_deer_Duodenum-3 RPKM	307.9	0	0	0	0	0	0	0	0	0	0	0	0
Water_deer_Duodenum-4 RPKM	315.359	0	0	0	0	0	0	0	0	0	0	0	0
Water_deer_Duodenum-5 RPKM	83.6927	272.12	90.9947	0	0	16.9513	0	0	0	0	0	0	12.3492
Yak_Duodenum-1 RPKM	1.37537	114.079	18.9396	40.0906	1.64742	0.209249	79.4195	0.978015	69.0095	0	0	0	51.1062
Yak_Duodenum-2 RPKM	184.348	131.457	0	0	311.815	0	0	0	0	0	0	0	0
Yak_Duodenum-3 RPKM	33.9811	113.182	36.2855	17.5605	0.0911789	0	19.6071	0.841251	124.89	0	0	0	44.5316
Yak_Duodenum-4 RPKM	0	0	0	0	0	0	0	0	0	0	0	0	0
Yak_Duodenum-5 RPKM	0	0	0	0	0	0	0	0	0	0	0	0	0
Dairy_cattle_Jejunum-1 RPKM	109.966	188.486	26.2777	31.113	3.72992	8.50119	4.23865	3.25201	4.26057	3.48738	2.84437	0.614438	39.0658
Dairy_cattle_Jejunum-2 RPKM	130.362	161.794	23.6976	22.2121	5.84088	6.03474	4.02058	4.66851	7.59453	2.99515	0.864849	0.780408	34.5499
Dairy_cattle_Jejunum-3 RPKM	92.8266	218.881	21.273	39.3021	7.13917	7.34555	0	0	6.14347	0	0	0	26.0733
Dairy_cattle_Jejunum-4 RPKM	76.5413	94.2037	56.8259	72.1087	0.794911	2.39778	2.77614	2.5493	2.52915	0	0	0	93.787
Dairy_cattle_Jejunum-5 RPKM	78.5689	100.568	34.2961	55.5995	0	2.059	5.41363	4.45226	4.47249	0	0	0	75.8061
Dairy_cattle_Jejunum-6 RPKM	43.8058	250.339	9.95918	11.6629	0.908916	3.83749	1.5757	0.87711	1.49094	0.480235	0.504788	0.245742	13.9891
Goat_Jejunum-1 RPKM	90.0352	270.068	29.7241	76.2193	8.48338	6.10543	4.03453	5.26696	18.2959	2.76168	3.8573	0	65.4678
Goat_Jejunum-2 RPKM	76.5731	240.77	30.2095	32.3561	15.9803	9.69029	4.08547	10.0296	8.87509	4.27811	0.960345	0	116.63
Goat_Jejunum-3 RPKM	102.071	193.204	51.4719	65.3631	8.15139	9.47336	4.676	3.96188	47.1845	12.2666	0.763741	0	53.5398
Goat_Jejunum-4 RPKM	81.118	191.184	27.0756	74.3065	3.49276	2.71066	3.66677	1.9854	15.0793	3.04423	0.0890643	0	155.144
Goat_Jejunum-5 RPKM	87.196	197.877	36.2682	51.7496	11.0741	6.26139	10.1943	3.43551	29.5254	5.84999	0	0	55.6128
Goat_Jejunum-6 RPKM	68.4055	243.526	78.1032	62.6142	2.60646	11.6868	4.79596	2.59897	16.7024	20.8007	0	0	110.033
Roe_deer_Jejunum-1 RPKM	45.3281	154.29	36.5994	19.7873	10.3865	1.51649	1.036	3.31035	13.6257	2.35333	0	0	23.0628
Roe_deer_Jejunum-2 RPKM	57.1661	131.56	8.92884	14.6455	4.12271	1.63909	0.711594	2.66042	25.0006	2.8606	4.15263	0	17.2936
Roe_deer_Jejunum-3 RPKM	35.1415	132.456	30.1989	10.2926	0.408576	1.06473	16.1043	0.103304	12.2969	0	0	0	7.45055
Roe_deer_Jejunum-4 RPKM	80.3519	263.884	57.6381	109.094	0	0	0	0	5.23132	0	0	0	11.1223
Roe_deer_Jejunum-5 RPKM	19.0865	105.326	41.8769	38.2424	3.64243	0	0	0	22.5609	18.9719	0	0	29.464
Sheep_Jejunum-1 RPKM	38.6512	204.418	53.1883	490.299	18.6725	70.4264	0.613275	0.600965	9.25958	0.823447	0.245773	0	70.9827
Sheep_Jejunum-2 RPKM	80.7351	241.612	55.552	135.553	9.06055	67.6879	8.93703	0.880271	6.66649	0.955009	0.495077	0	56.6231
Sheep_Jejunum-3 RPKM	64.8196	202.339	56.1413	180.059	22.1303	10.7806	2.62771	0.650004	10.9352	0.177096	0.971953	0	37.4997
Sheep_Jejunum-4 RPKM	63.6228	253.566	43.8592	229.353	9.08524	3.50375	1.14437	0.584029	8.47476	1.0406	0.081845	0	116.625
Sheep_Jejunum-5 RPKM	54.4015	514.814	63.2446	135.022	10.2619	2.88435	0.901565	0.32165	3.32654	0.472377	0	0	20.5711
Water_buffalos_Jejunum-1 RPKM	89.9591	248.832	58.0496	74.2289	0	0	0	0	0	0	0	0	0
Water_buffalos_Jejunum-2 RPKM	108.135	127.905	26.6109	49.543	2.64262	4.67788	4.8429	4.01659	8.93023	1.87046	8.54134	0	26.5493
Water_buffalos_Jejunum-3 RPKM	199.485	118.807	0	0	0	0	0	0	0	0	0	0	23.3914
Water_buffalos_Jejunum-4 RPKM	0	583.793	0	0	0	0	0	0	0	0	0	0	0
Water_buffalos_Jejunum-5 RPKM	128.255	155.292	4.7734	12.4031	2.52528	3.02269	2.28277	16.1114	9.14486	5.08492	1.50643	0.916575	30.143
Water_deer_Jejunum-1 RPKM	62.3855	142.379	16.217	99.6804	0	0	7.1783	11.0081	7.81019	0	0	0	14.0941
Water_deer_Jejunum-2 RPKM	155.653	166.735	1.21209	5.23431	0.367201	0	0	8.48625	0	0	0	0	6.65684
Water_deer_Jejunum-3 RPKM	75.7265	59.6756	15.7025	194.224	0	0	0	6.86428	0	0	0	0	71.3418
Water_deer_Jejunum-4 RPKM	56.7522	164.341	0	83.7084	0	0	0	0	0	0	0	0	69.8363
Water_deer_Jejunum-5 RPKM	46.834	504.653	6.41851	41.2554	0.854664	0	0	24.8267	0	0	0	0	24.0164
Yak_Jejunum-1 RPKM	251.119	0	0	0	0	0	0	0	0	0	0	0	0
Yak_Jejunum-2 RPKM	274.768	0	0	402.66	0	0	0	0	0	0	0	0	0
Yak_Jejunum-3 RPKM	105.162	142.586	17.7079	31.4146	14.6366	8.26544	11.0228	0	0	0	0	0	0
Yak_Jejunum-4 RPKM	0	0	0	0	0	0	0	0	0	0	0	0	0
Yak_Jejunum-5 RPKM	100.687	194.822	12.87	19.737	5.86921	1.73476	4.81538	1.79795	6.49753	1.25607	2.59635	0	18.7759
Dairy_cattle_Ileum-1 RPKM	0	226.123	18.2756	0	12.1707	0	123.481	0	11.6966	0	0	0	0
Dairy_cattle_Ileum-2 RPKM	0	524.189	0	0	0	0	0	0	0	0	0	0	0
Dairy_cattle_Ileum-3 RPKM	19.4546	235.786	40.0545	20.4689	12.2376	0	78.3018	0	22.5042	0	0	0	2.84275
Dairy_cattle_Ileum-4 RPKM	6.12766	287.655	69.5232	28.4015	8.37921	0	19.5566	0	8.53232	0	0	0	4.3888
Dairy_cattle_Ileum-5 RPKM	0	159.52	187.129	0	0	0	124.905	0	0	0	0	0	0
Dairy_cattle_Ileum-6 RPKM	24.1539	345.844	40.4068	30.1923	0	0	0	0	35.0835	0	0	0	0
Goat_Ileum-1 RPKM	1.19218	215.067	51.2042	170.653	6.15323	0.528632	6.62174	0.561693	44.7957	5.42847	0	0	32.2572
Goat_Ileum-2 RPKM	1.51819	187.893	54.0189	261.542	0.670405	0.294576	1.41151	0.250842	72.188	0.0482722	0	0	46.0155
Goat_Ileum-3 RPKM	2.0026	216.932	88.9884	188.283	0.850096	1.7134	15.2039	0.804753	27.9985	0.210515	0	0	29.7381
Goat_Ileum-4 RPKM	3.00502	243.087	21.9807	73.7517	3.36185	0.398186	4.84757	1.36849	56.6631	0.343339	0	0	89.2061
Goat_Ileum-5 RPKM	7.91119	186.616	22.9869	134.314	10.3527	1.19369	33.6751	1.3585	42.5759	0.379488	0	0	68.3015
Goat_Ileum-6 RPKM	0.621334	168.271	34.4468	171.57	0.538558	0.640923	9.32972	1.85699	74.6265	2.47421	0	0	53.445
Roe_deer_Ileum-1 RPKM	0	531.418	0	0	0	0	0	0	0	0	0	0	0
Roe_deer_Ileum-2 RPKM	210.208	216.639	0	0	14.1881	6.70318	0	0	0	0	0	0	17.0921
Roe_deer_Ileum-3 RPKM	0	0	0	0	0	0	0	0	0	0	0	0	0
Roe_deer_Ileum-4 RPKM	71.363	99.5968	61.3476	235.46	7.09847	0	0	0	30.858	0	0	0	50.706
Roe_deer_Ileum-5 RPKM	0	256.896	76.1765	43.941	15.1784	0	0	0	42.9572	0	0	0	21.9438
Sheep_Ileum-1 RPKM	17.8347	75.3905	87.4886	592.817	3.86392	5.91286	1.31751	0.574064	14.1997	0	0	0	39.9684
Sheep_Ileum-2 RPKM	2.50849	163.458	99.9771	285.235	5.2492	1.40546	1.21753	0.924034	46.4021	0	0	0	24.5218
Sheep_Ileum-3 RPKM	6.3135	177.502	125.237	181.825	8.57208	1.65916	1.15156	1.76787	37.9362	0	0	0	17.4239
Sheep_Ileum-4 RPKM	4.10122	130.647	162.764	355.377	5.03249	0.453125	1.50984	0.666433	23.6516	0	0	0	28.0241
Sheep_Ileum-5 RPKM	13.7609	81.1769	119.855	500.148	2.92994	3.8434	0.841357	1.36122	12.3157	0	0	0	9.36221
Water_buffalos_Ileum-1 RPKM	0	263.455	0	340.651	0	27.8269	0	0	0	0	0	0	46.8218
Water_buffalos_Ileum-2 RPKM	0	531.418	0	0	0	0	0	0	0	0	0	0	0
Water_buffalos_Ileum-3 RPKM	264.609	44.8373	15.4381	0	0.380914	15.4358	7.5344	1.45549	6.78361	0	0.473756	0	28.4534
Water_buffalos_Ileum-4 RPKM	33.9692	133.539	0	0	0	0	131.512	0	0	0	0	0	34.2668
Water_buffalos_Ileum-5 RPKM	27.472	142.064	2.75465	26.6156	0	2.53993	47.6362	0	32.473	3.55465	0	0	69.11
Water_deer_Ileum-1 RPKM	16.776	205.887	64.4765	0	0	0	60.9841	0	20.8409	0	0	0	18.2677
Water_deer_Ileum-2 RPKM	41.5115	258.88	27.4968	6.38139	0	0.515706	4.42944	0.298855	17.3632	0	0	0	34.9763
Water_deer_Ileum-3 RPKM	69.1348	225.478	32.3454	16.6493	0	0	0	0.150272	8.52545	0	0	0	50.5994
Water_deer_Ileum-4 RPKM	9.88375	182.947	48.4864	0	0	0	0	0	31.2644	0	0	0	88.8926
Water_deer_Ileum-5 RPKM	0	145.586	469.082	0	0	0	0	0	0	0	0	0	19.8647
Yak_Ileum-1 RPKM	0	0	0	0	0	0	0	0	0	0	0	0	0
Yak_Ileum-2 RPKM	281.558	96.5877	0	0	53.3414	0	12.4465	13.454	35.0269	0	0	0	18.137
Yak_Ileum-3 RPKM	0	531.418	0	0	0	0	0	0	0	0	0	0	0
Yak_Ileum-4 RPKM	61.9249	233.918	0	0	53.9061	0	0	0	0	0	0	0	90.9618
Yak_Ileum-5 RPKM	0	0	0	0	0	0	0	0	0	0	0	0	0
Dairy_cattle_Cecum-1 RPKM	214.197	217.685	5.68238	4.26304	3.07548	14.2347	5.56459	1.73682	3.17414	0	0	0.181633	19.1058
Dairy_cattle_Cecum-2 RPKM	237.047	238.529	10.4055	2.26673	1.35844	5.53558	0.746793	2.88916	2.9135	0	0.0813022	6.41105	9.83582
Dairy_cattle_Cecum-3 RPKM	185.057	264.457	6.40866	1.86703	1.8828	16.0544	2.35641	1.63039	2.26831	0	0	0	16.3362
Dairy_cattle_Cecum-4 RPKM	245.144	231.31	5.94858	5.32187	1.11907	5.73716	1.9846	1.43755	3.48906	0	0.0996921	0.501471	13.3537
Dairy_cattle_Cecum-5 RPKM	217.748	236.23	10.373	4.64754	1.5438	9.42639	1.46551	1.25134	5.61027	0	0	4.10586	12.7102
Dairy_cattle_Cecum-6 RPKM	244.656	208.871	7.73109	2.56624	3.07747	10.5609	2.89786	1.36483	1.64494	0	0.13255	2.08234	18.1601
Goat_Cecum-1 RPKM	112.728	289.51	9.33671	4.81034	6.37006	5.36164	0.10286	2.50727	2.63487	0	0.157851	1.82542	37.6757
Goat_Cecum-2 RPKM	109.212	280.655	21.3319	4.27567	1.83869	2.60828	0.102301	4.94566	2.56022	0	4.37961	4.44469	28.0043
Goat_Cecum-3 RPKM	121.117	275.535	21.0425	8.33809	3.42296	0.04395	2.05526	1.55612	3.09408	0	0.169909	0	39.2908
Goat_Cecum-4 RPKM	161.551	224.979	5.62799	1.67165	3.90565	2.47482	0.552236	1.55217	1.48623	0	0	2.83548	60.0654
Goat_Cecum-5 RPKM	133.501	265.177	14.0269	3.3088	6.62429	0.150191	0.0956134	0.631325	2.6674	0.0228333	0.133101	1.38093	27.5068
Goat_Cecum-6 RPKM	131.576	253.723	14.3263	6.26265	5.48459	3.85431	1.59078	2.00806	2.92218	0	0.217628	4.30063	47.2474
Roe_deer_Cecum-1 RPKM	134.599	275.429	14.9331	0.732857	29.5234	3.58717	1.30154	14.5125	1.06833	0	0.614775	0	38.3049
Roe_deer_Cecum-2 RPKM	130.683	326.66	6.6778	0.606143	5.51437	1.89219	0	6.39633	0.347159	0	0.173565	0	21.2493
Roe_deer_Cecum-3 RPKM	163.938	256.573	26.0558	0.177731	8.29873	2.28833	0	3.28412	1.06974	0	0.241256	0	12.0164
Roe_deer_Cecum-4 RPKM	150.331	256.441	19.471	1.2813	6.00186	3.92417	0	10.5271	0.19832	0	0	0	17.2379
Roe_deer_Cecum-5 RPKM	174.663	281.353	6.16236	1.02068	2.19695	3.63691	0	8.33863	0.365757	0	0	0	15.1392
Sheep_Cecum-1 RPKM	142.665	245.237	31.2837	25.3188	8.05969	3.48343	0.306884	3.79064	1.71456	0	0.264746	7.02602	29.0606
Sheep_Cecum-2 RPKM	119.214	257.875	16.9389	3.9756	6.02712	9.66055	2.05334	4.31433	0.457954	0	0.666861	8.92643	40.4932
Sheep_Cecum-3 RPKM	157.441	256.144	9.43898	2.54539	9.63395	6.82183	1.72536	6.37584	0.387268	0	0.369565	13.2963	33.0249
Sheep_Cecum-4 RPKM	133.407	265.582	15.6429	7.3607	5.32743	18.6159	2.38225	5.03288	0.728766	0	0.358513	6.51827	42.4426
Sheep_Cecum-5 RPKM	144.386	209.271	14.0024	17.6874	7.75419	16.0617	6.39742	13.0172	0.888137	0	0.275839	17.2968	42.7719
Water_buffalos_Cecum-1 RPKM	141.093	294.334	12.2235	8.50182	2.69503	6.388	0.783902	2.63744	8.15939	0	0	2.50103	13.6723
Water_buffalos_Cecum-2 RPKM	224.639	232.264	16.4587	0.779664	5.31338	7.94657	5.96965	2.35404	3.78856	0	0.126524	6.35941	18.326
Water_buffalos_Cecum-3 RPKM	238.013	107.801	9.47186	0.720147	1.87353	11.6253	4.51513	3.86677	3.96608	0.19801	0.54097	0.560195	18.009
Water_buffalos_Cecum-4 RPKM	93.4398	300.083	3.91651	0.512205	0.152747	7.71456	14.1822	12.5294	2.54014	0.0601457	0.0933057	0.242325	45.3724
Water_buffalos_Cecum-5 RPKM	179.404	196.032	5.74522	1.26804	3.2163	5.40859	4.67498	3.64581	5.96752	0.275201	0.136181	0	82.2853
Water_deer_Cecum-1 RPKM	116.812	259.205	22.8965	0	1.04446	6.65728	0.492054	12.0173	3.48873	0	0	3.51455	8.11107
Water_deer_Cecum-2 RPKM	153.112	229.718	20.0813	0.0385324	3.65159	7.83204	0.0373489	27.1674	1.11842	0	0	3.7475	13.4885
Water_deer_Cecum-3 RPKM	206.379	204.797	15.5903	0.244419	2.6277	9.0968	0.0771816	18.996	0.476614	0	0	2.81428	6.84925
Water_deer_Cecum-4 RPKM	143.516	167.69	30.8611	0	2.64068	7.54357	0	63.7991	1.10064	0	0	10.6705	12.1845
Water_deer_Cecum-5 RPKM	164.188	241.223	12.7278	0.0418506	3.69419	7.74527	0	25.6351	0.888554	0	0	8.81814	7.09562
Yak_Cecum-1 RPKM	249.188	194.146	11.234	3.02138	7.92243	5.54583	7.89071	2.58263	4.07108	0	0.904213	0	21.2481
Yak_Cecum-2 RPKM	245.962	199.926	7.67328	3.50828	14.7814	3.27303	8.79799	2.97865	5.9043	0	0.584651	2.93349	21.5967
Yak_Cecum-3 RPKM	276.919	168.488	8.69587	2.56482	2.73704	3.84057	11.3625	2.49668	4.80548	0	1.74415	0	18.2452
Yak_Cecum-4 RPKM	255.996	175.433	13.6656	1.26349	22.1456	2.65582	3.82954	7.41944	3.40943	0	0.528298	0.813812	19.8456
Yak_Cecum-5 RPKM	255.515	195.842	6.41251	1.11741	5.83993	1.9814	6.87016	3.71139	2.63215	0	2.04102	0.188415	18.2668
Dairy_cattle_Colon-1 RPKM	208.127	237.592	8.87475	5.10634	2.62053	9.99956	2.98363	2.18162	5.87966	0	0.118472	0.434458	13.3442
Dairy_cattle_Colon-2 RPKM	227.758	239.322	11.8214	2.615	1.6501	6.23248	0.612145	3.68171	5.43655	0	0.0978201	0.540569	11.2994
Dairy_cattle_Colon-3 RPKM	195.477	260.956	6.81628	2.75753	2.14377	8.32234	1.23909	1.54011	4.236	0	0.0828146	0	24.5875
Dairy_cattle_Colon-4 RPKM	240.354	245.581	7.80354	3.22954	0.825455	4.30824	0.946953	1.78522	2.91424	0	0.104551	0.242079	9.99278
Dairy_cattle_Colon-5 RPKM	241.176	218.552	10.5007	5.92147	1.48969	3.88014	0.588697	1.36533	6.82765	0	0.0804714	3.36365	10.8481
Dairy_cattle_Colon-6 RPKM	244.6	218.497	8.08578	2.07997	2.55029	9.1153	1.4028	1.62151	1.57244	0	0.0737873	1.84755	14.3645
Goat_Colon-1 RPKM	100.865	308.972	6.56817	3.48829	9.44749	3.5371	0.240501	1.57482	1.47295	0	0.364848	5.77188	40.1014
Goat_Colon-2 RPKM	113.617	281.477	25.7728	4.42337	1.6725	1.399	0.0401262	1.31027	3.06243	0	5.60507	3.96081	27.2615
Goat_Colon-3 RPKM	121.121	273.163	27.9091	8.21913	4.48716	0.0442067	1.40727	1.7137	4.57769	0	0.172912	0	29.9922
Goat_Colon-4 RPKM	139.64	254.129	9.49028	3.59953	4.64891	4.33229	0.354746	2.16197	9.42958	0	0	2.26466	37.0687
Goat_Colon-5 RPKM	130.657	263.662	10.915	2.73355	7.67875	0.105459	0.0679805	0.634306	2.25061	0	0.300562	3.6318	30.7125
Goat_Colon-6 RPKM	144.209	243.554	10.4559	4.68722	3.5604	3.22879	1.57408	0.949048	1.51993	0	0.191175	3.25981	50.1648
Roe_deer_Colon-1 RPKM	163.508	265.169	9.97445	0.605151	25.7167	4.49258	0.183314	6.74616	0.976611	0	0.88306	0	21.6186
Roe_deer_Colon-2 RPKM	175	265.651	6.62542	0.485648	5.05045	2.59771	0	4.16514	0.233158	0	0	0	19.0203
Roe_deer_Colon-3 RPKM	176.501	220.342	30.752	0.218217	3.19574	2.55759	0	2.23519	1.42829	0	0.606524	0	32.0869
Roe_deer_Colon-4 RPKM	189.333	212.296	24.843	1.33655	3.44934	5.01828	0	2.5618	0.250098	0	0	0	16.5819
Roe_deer_Colon-5 RPKM	198.307	251.336	8.07512	0.80072	1.8923	3.34781	0	1.29715	0.368443	0	0	0	13.3841
Sheep_Colon-1 RPKM	178.076	213.381	21.5133	11.2173	7.45161	4.47674	1.20161	13.4309	0.598314	0	0.327967	8.0248	27.2485
Sheep_Colon-2 RPKM	153.787	225.927	15.9364	3.58533	9.68052	16.8334	5.22112	4.29837	0.628265	0	0.953167	15.5819	41.3514
Sheep_Colon-3 RPKM	152.513	262.906	9.68617	3.81972	9.99463	5.39229	2.42585	5.3692	0.534481	0	0.397473	13.8421	33.8608
Sheep_Colon-4 RPKM	155.095	230.407	15.835	6.98731	6.74711	21.9621	3.16017	6.96442	2.04761	0	0.424554	7.50226	46.8566
Sheep_Colon-5 RPKM	164.261	213.526	14.4934	14.6763	8.26372	15.3384	4.48925	5.83514	1.03359	0	0.266032	12.9369	36.2954
Water_buffalos_Colon-1 RPKM	190.461	240.873	10.9262	0.937028	5.88764	5.21048	0.0714064	2.03384	6.21879	0	0	2.57422	17.3272
Water_buffalos_Colon-2 RPKM	263.443	187.265	13.3861	1.16357	8.36896	7.35733	10.6386	3.26577	4.93019	0	0.258498	1.23855	20.5837
Water_buffalos_Colon-3 RPKM	237.977	196.793	3.68002	0	0.576084	5.56049	1.10083	8.70054	0.896612	0	0.308843	13.4325	14.3575
Water_buffalos_Colon-4 RPKM	118.888	188.543	2.1489	0	0	2.54862	117.874	12.9388	0.23808	0	0	1.89349	40.0365
Water_buffalos_Colon-5 RPKM	170.109	188.176	6.05267	0.132909	4.34025	5.65462	2.25445	2.44256	2.47743	0	0.241883	0	108.38
Water_deer_Colon-1 RPKM	130.156	236.205	32.5163	0.0124898	1.19543	3.63527	0.12667	7.77347	2.91173	0	0	2.55638	6.59314
Water_deer_Colon-2 RPKM	141.041	234.032	19.6661	0.0869053	2.76066	11.112	0	35.8086	1.03914	0	0	3.47912	8.42905
Water_deer_Colon-3 RPKM	188.187	207.215	14.3412	0.199622	2.57509	8.86482	0.100235	42.5719	0.646216	0	0	2.98514	8.89786
Water_deer_Colon-4 RPKM	126.034	184.742	21.3623	0	3.07608	11.8968	0	74.6115	1.5877	0	0	9.37737	14.9175
Water_deer_Colon-5 RPKM	199.297	210.288	9.26575	0	4.36054	5.70062	0	24.2342	0.402202	0	0	7.57768	5.8398
Yak_Colon-1 RPKM	0	230.765	0	0	0	0	0	0	142.072	0	0	0	0
Yak_Colon-2 RPKM	263.45	183.635	7.01457	3.21172	14.647	2.42423	8.02644	5.00928	6.94041	0	0.490821	2.71205	19.4041
Yak_Colon-3 RPKM	275.262	168.658	10.0516	2.76245	3.13641	4.02488	11.7767	2.20978	4.65203	0	1.70578	0	19.2473
Yak_Colon-4 RPKM	240.487	203.355	6.1837	1.6229	14.0364	2.20612	7.11675	3.44805	1.23946	0	0.710286	0.753731	22.6063
Yak_Colon-5 RPKM	266.084	187.243	5.17677	1.00307	5.11923	2.11081	6.93505	3.23559	1.81862	0	1.99606	0.190887	19.1615
Dairy_cattle_Rectum-1 RPKM	231.625	231.471	6.92261	2.45085	3.16179	7.46766	1.74868	1.27663	2.87809	0	0.103695	0.337269	10.9228
Dairy_cattle_Rectum-2 RPKM	212.848	197.413	6.11801	1.37662	25.8604	15.581	1.46518	3.64891	2.15072	0	0	0.332183	16.7597
Dairy_cattle_Rectum-3 RPKM	177.645	257.233	7.40808	3.54791	4.12608	18.5458	1.17849	2.15958	5.71561	0	0.0891363	0	21.0197
Dairy_cattle_Rectum-4 RPKM	248.899	229.866	6.20781	3.3529	0.819372	6.67795	0.982388	3.03308	3.33909	0	0.111167	0	11.2406
Dairy_cattle_Rectum-5 RPKM	240.717	214.405	6.9227	2.47627	2.19212	11.3284	1.96564	4.31944	3.31573	0	0.0900703	0.107461	18.6852
Dairy_cattle_Rectum-6 RPKM	252.219	217.848	8.13287	1.5228	3.57642	8.2028	0.80556	1.40955	2.10093	0	0.072962	0.209999	13.4373
Goat_Rectum-1 RPKM	75.7699	321.478	13.0614	6.56297	6.0512	7.96836	0.171339	1.86394	5.03007	0	0.163679	0.751194	39.6804
Goat_Rectum-2 RPKM	133.276	252.39	12.5059	3.44014	1.19635	6.80605	0.091931	2.58897	0.978986	0	2.57534	1.97122	36.1604
Goat_Rectum-3 RPKM	100.307	289.35	25.4133	10.6368	3.60279	0.0605264	1.34269	1.73025	4.71518	0	0.0869117	0	35.2941
Goat_Rectum-4 RPKM	116.268	254.656	13.482	4.65532	6.82927	4.35232	0.0523056	3.03241	7.2435	0	0	1.07929	46.6921
Goat_Rectum-5 RPKM	60.9411	295.504	21.5096	8.17069	8.57694	0.357391	0.111527	1.32313	4.22162	0	0.417419	4.0567	65.5628
Goat_Rectum-6 RPKM	100.319	263.381	17.4042	10.4085	2.5792	2.08232	0.441109	0.86531	3.39392	0	0.108184	0.915676	56.4419
Roe_deer_Rectum-1 RPKM	150.726	268.698	13.1524	0.481603	25.3806	4.34497	0.212356	8.77406	1.91174	0	1.68086	0	25.8797
Roe_deer_Rectum-2 RPKM	197.066	242.484	7.47181	0.563671	4.90024	1.93769	0	3.94484	0.309676	0	0	0	26.9729
Roe_deer_Rectum-3 RPKM	170.167	245.283	25.7931	0.233897	3.58592	3.252	0	2.18406	1.60785	0	1.07965	0	11.6907
Roe_deer_Rectum-4 RPKM	152.516	237.117	36.0185	1.78013	4.6761	5.55401	0	1.29347	0.28331	0	0	0	18.6852
Roe_deer_Rectum-5 RPKM	175.221	252.945	7.26886	1.0326	1.64232	6.20233	0	1.51606	1.02586	0	0	0	11.2188
Sheep_Rectum-1 RPKM	150.84	249.232	26.935	11.7406	7.96978	3.57965	0.923517	2.16191	2.12285	0	0.362954	6.10164	23.3026
Sheep_Rectum-2 RPKM	138.546	227.644	9.8551	3.22944	6.38641	10.2203	2.16755	2.19041	1.68497	0	0.532894	5.23529	56.4639
Sheep_Rectum-3 RPKM	150.849	254.352	9.3467	3.86316	7.85143	8.16722	1.57241	6.51487	0.8513	0	0.215453	7.1206	32.3267
Sheep_Rectum-4 RPKM	156.129	224.406	7.94492	7.33211	5.83195	23.5917	2.85648	3.83266	2.44996	0	0.269963	4.48014	38.3513
Sheep_Rectum-5 RPKM	150.421	226.033	17.091	15.8791	8.3273	16.1734	2.152	5.00652	1.85292	0	0.179488	5.48959	45.2794
Water_buffalos_Rectum-1 RPKM	166.35	272.322	9.67247	6.42567	2.77293	5.01537	0.336436	2.05565	7.7714	0.0454997	0	2.00756	11.7018
Water_buffalos_Rectum-2 RPKM	263.233	181.392	12.3024	0.91826	7.71954	5.43285	8.27305	11.2474	3.92581	0	0.216353	2.2778	18.4592
Water_buffalos_Rectum-3 RPKM	221.482	216.18	4.29636	0	0.524116	6.34477	1.07105	3.31834	1.40949	0	0.269606	11.9944	18.1669
Water_buffalos_Rectum-4 RPKM	108.147	148.399	1.61594	0	0	2.52261	176.995	11.3631	0.224276	0	0.0690712	1.7014	32.9365
Water_buffalos_Rectum-5 RPKM	166.406	185.85	5.79062	0.0731558	4.61616	5.70893	2.15744	2.39493	1.20043	0	0.247708	0	114.205
Water_deer_Rectum-1 RPKM	87.611	256.138	27.7962	0	4.83762	11.0822	0.0582735	13.5356	0.968249	0	0	4.85873	25.9773
Water_deer_Rectum-2 RPKM	138.633	239.342	16.3	0.0977729	2.20004	11.0545	0.0660215	34.2055	0.936595	0	0	3.64098	8.61786
Water_deer_Rectum-3 RPKM	239.554	168.511	14.2592	0.0839516	3.67829	5.95679	0.0541555	19.4871	0.276088	0	0	3.19973	9.06351
Water_deer_Rectum-4 RPKM	137.119	167.283	34.7043	0	3.84864	9.56944	0	63.0883	0.386956	0	0	10.8194	19.338
Water_deer_Rectum-5 RPKM	192.655	182.086	9.64281	0	3.6431	3.88009	0	57.0806	0.481026	0	0	9.63132	13.0781
Yak_Rectum-1 RPKM	240.273	179.178	11.1592	6.14217	9.11004	1.92063	12.0444	15.5721	6.86264	0	0.804181	0	20.4719
Yak_Rectum-2 RPKM	270.685	136.564	7.52709	1.70327	18.1791	1.93396	2.86932	44.9814	7.55212	0	0.385101	1.66499	11.453
Yak_Rectum-3 RPKM	284.547	155.953	9.49589	3.33105	3.12124	2.20104	13.5477	2.20197	6.5385	0	2.48567	0	17.5661
Yak_Rectum-4 RPKM	245.735	195.122	12.7532	1.31613	18.5603	2.43306	4.22458	5.62734	4.52157	0	0.508026	1.47627	19.9193
Yak_Rectum-5 RPKM	246.381	206.836	9.93388	1.01865	6.85406	2.3915	5.6529	3.36995	8.24931	0	1.39871	0.119862	15.2635

## Sheet: Table S17
Table S17. RPKM of vOTUs for each sample grouped by host class level
Host Class	Bacteroidia	Clostridia	Bacilli	Saccharimonadia	Alphaproteobacteria	Negativicutes	Kiritimatiellae	Spirochaetia	Methanobacteria	Synergistia	Thermoplasmata	Methanomicrobia	Others
Dairy_cattle_Rumen-1 RPKM	1821	528.096	26.3964	13.1647	29.4349	26.3534	25.766	12.3175	3.81874	0.0583032	0.644252	0	61.9621
Dairy_cattle_Rumen-2 RPKM	1774.2	542.736	27.3069	11.1469	11.1931	37.442	22.8766	12.9396	3.44359	0.0624083	0.358227	0.000193765	63.891
Dairy_cattle_Rumen-3 RPKM	1641.81	560.917	43.5013	13.215	48.7945	22.4618	22.2943	28.0395	5.29293	0.0516728	0.560241	0.00176101	68.0409
Dairy_cattle_Rumen-4 RPKM	1857.22	497.701	27.4828	9.56024	29.8466	50.4202	17.2659	19.5125	5.44103	0.0546524	0.61546	0	53.8811
Dairy_cattle_Rumen-5 RPKM	1751.62	512.074	45.7017	19.9593	47.7812	34.6925	20.956	8.71549	6.43183	0.0650151	0.328599	0	68.8051
Dairy_cattle_Rumen-6 RPKM	1796.22	549.881	47.977	13.6042	26.5382	35.3375	18.8314	12.7939	6.34084	0.056315	0.333578	0.000433464	63.8823
Goat_Rumen-1 RPKM	1888.72	277.197	92.5744	14.2989	5.5465	39.9557	12.2139	8.00662	16.8175	183.979	0.530444	0.000246764	96.8352
Goat_Rumen-2 RPKM	1765.96	507.109	26.7648	8.89885	0.646856	25.1719	28.6453	6.27639	10.3202	187.766	2.19285	0.00459837	108.175
Goat_Rumen-3 RPKM	1778.8	269.066	250.977	11.3685	3.83546	29.4324	35.5177	1.4506	15.9585	135.755	0.293693	0.000278258	70.937
Goat_Rumen-4 RPKM	1541	415.899	50.6207	7.99714	13.3469	151.621	79.2349	1.18129	24.3106	133.647	2.02886	0.000102094	94.8699
Goat_Rumen-5 RPKM	1500.52	644.449	152.398	52.1539	46.2009	81.9035	83.9477	2.94695	6.12308	279.846	3.62985	0.00243374	199.946
Goat_Rumen-6 RPKM	1373.93	418.495	136.406	9.68955	21.156	845.916	35.9129	1.44015	45.0364	156.899	2.36708	0.000933277	127.538
Roe_deer_Rumen-1 RPKM	2891.05	115.518	10.7949	2.07103	0.489007	25.231	2.23929	9.22847	1.57319	3.39603	0.744091	0	32.5749
Roe_deer_Rumen-2 RPKM	2207.51	130.322	75.9859	12.7791	107.912	8.62656	1.08654	39.6742	1.13314	0.174964	0.262816	0	38.1939
Roe_deer_Rumen-3 RPKM	2257.22	163.306	1.97802	1.00026	55.3158	8.73605	7.07682	16.0165	1.45872	114.51	4.22837	0	469.524
Roe_deer_Rumen-4 RPKM	3691.11	188.713	8.35751	27.0655	49.5825	31.068	0.00274308	21.1743	1.70491	0.0154754	0.00119632	0	25.2927
Roe_deer_Rumen-5 RPKM	2079.32	526.649	80.8101	9.55601	193.913	7.47314	3.53432	7.16258	9.00097	0.252773	0.701409	0	268.998
Sheep_Rumen-1 RPKM	1172.24	687.389	130.447	183.251	33.6741	80.6709	19.1473	4.79245	4.87269	0.0978838	14.0293	0.00492295	112.088
Sheep_Rumen-2 RPKM	1464.26	879.971	68.0222	5.75441	43.606	28.0269	39.6463	7.52701	4.86009	0.0665067	7.30076	0.00988365	231.629
Sheep_Rumen-3 RPKM	1296.54	474.028	135.424	20.3465	58.8717	721.86	50.4123	15.217	7.04881	0.635202	4.78911	0.0127205	140.357
Sheep_Rumen-4 RPKM	1607.17	470.945	178.618	12.7723	24.0834	27.6171	53.1192	14.3339	21.611	0.0364577	16.5961	0.0064	244.669
Sheep_Rumen-5 RPKM	1289.18	597.096	249.07	57.7793	24.6696	32.4566	24.6876	5.39959	12.3643	0.0743812	12.9	0.000470883	239.437
Water_buffalos_Rumen-1 RPKM	1793.1	1130.36	133.789	63.2922	7.38094	11.9184	3.46731	6.68676	19.8482	0.0957331	0.196918	0	78.8291
Water_buffalos_Rumen-2 RPKM	1594.97	386.025	81.0785	7.67452	11.7767	18.3626	27.8592	18.2598	8.10329	0.351026	6.53777	0	367.489
Water_buffalos_Rumen-3 RPKM	1497.56	409.391	101.437	2.8188	138.918	16.9715	56.8073	82.6552	6.41522	1.08395	4.46272	0.000438029	185.263
Water_buffalos_Rumen-4 RPKM	1475.94	1181.99	73.8119	12.4936	0.91209	3.10731	47.5563	38.7881	11.4717	0.0241335	0.888014	0.479768	268.146
Water_buffalos_Rumen-5 RPKM	1647.59	579.618	228.276	8.95515	91.9521	3.99264	53.485	137.915	17.6638	0.583999	9.62354	0.0059758	289.737
Water_deer_Rumen-1 RPKM	3088.42	88.6822	8.4079	0.548963	9.5341	6.45239	6.92419	13.3253	1.24341	0.0123301	0.389432	0.000364917	54.4153
Water_deer_Rumen-2 RPKM	3116.02	271.304	64.0241	0.705084	26.34	36.003	0.66628	20.6823	2.08943	0.0288931	0.2872	0.483303	87.8829
Water_deer_Rumen-3 RPKM	3603.37	203.395	5.28723	0.308029	6.92037	11.6687	0.912531	43.9985	0.278253	0.0117059	0.0885152	0.0302582	31.1533
Water_deer_Rumen-4 RPKM	3092.08	97.0994	70.8906	0.136968	17.7233	23.6308	0.052811	1.05142	5.01528	0.00765302	0.113736	0.00157754	31.4944
Water_deer_Rumen-5 RPKM	2318.64	562.85	62.4553	0.728113	4.02112	14.1261	0.249018	25.6619	1.30557	0.00469139	0.0656767	0.018028	306.483
Yak_Rumen-1 RPKM	1616.84	175.998	51.3479	22.604	165.033	6.26055	28.7495	21.7587	27.8947	0.466603	0.948442	0	163.525
Yak_Rumen-2 RPKM	1835.39	125.34	40.41	6.09678	60.4194	5.22779	38.2757	62.775	2.05872	0.401157	0.618967	0	211.168
Yak_Rumen-3 RPKM	2108.54	185.736	61.4555	16.9838	125.263	4.43108	57.7758	10.2911	10.1992	0.0725141	3.40401	0	224.827
Yak_Rumen-4 RPKM	1441.85	179.521	52.212	4.97508	72.2857	4.50965	28.8158	29.4916	5.03861	3.53795	0.730234	0	565.062
Yak_Rumen-5 RPKM	1214.52	296.463	38.8253	2.70651	131.769	1.65616	33.2183	34.0063	73.8244	1.20484	0.785285	0	229.563
Dairy_cattle_Reticulum-1 RPKM	1691.4	382.023	25.4012	10.0308	40.7882	17.7708	48.0491	13.5655	3.56116	0.0392349	0.603537	0.000549302	76.6389
Dairy_cattle_Reticulum-2 RPKM	1592.34	270.961	29.5478	8.24981	101.563	23.2025	40.4977	8.75474	3.91614	0.0322567	0.276038	0.00624791	95.8264
Dairy_cattle_Reticulum-3 RPKM	1471.29	521.075	104.865	19.574	40.7164	36.4551	6.90935	22.4144	11.9355	0.0553752	0.353326	0	92.7027
Dairy_cattle_Reticulum-4 RPKM	1674.86	395.205	45.2936	12.0076	36.4953	45.7779	10.1793	22.4137	16.08	0.0715398	0.444554	0	85.2699
Dairy_cattle_Reticulum-5 RPKM	1620.81	440.455	44.9331	18.3655	41.901	38.3365	17.1069	6.99491	10.92	0.0640272	0.431219	0	78.692
Dairy_cattle_Reticulum-6 RPKM	1622.13	424.086	39.9651	10.9788	35.9082	33.0473	24.7981	16.9554	13.2294	0.0397149	0.330816	0	84.9426
Goat_Reticulum-1 RPKM	1862.28	338.191	101.595	13.378	5.84298	51.4761	13.0626	9.92992	23.6115	160.381	0.766562	0.00208896	107.374
Goat_Reticulum-2 RPKM	1973.57	410.727	59.216	11.5007	1.04434	12.0742	9.14126	10.012	6.84668	138.288	1.91883	0	101.445
Goat_Reticulum-3 RPKM	1673.3	348.225	274.927	15.3643	1.67891	27.8892	28.8509	1.97632	24.6645	81.0433	0.350666	0	108.09
Goat_Reticulum-4 RPKM	1508.31	476.355	55.9304	9.76653	15.3042	155.02	69.5486	1.48215	19.3491	107.749	2.39505	0.000800944	105.087
Goat_Reticulum-5 RPKM	1325.19	618.176	134.398	32.2522	76.2904	122.919	52.4652	2.00161	5.86802	371.512	1.63172	0.000620428	169.06
Goat_Reticulum-6 RPKM	1716.87	431.585	124.206	19.8166	36.6215	474.811	37.8111	3.29354	30.8462	22.326	2.55516	0.000679745	144.767
Roe_deer_Reticulum-1 RPKM	2829.14	114.159	12.1983	2.72748	0.593147	23.3984	3.09376	8.965	0.674455	5.58416	1.48017	0	30.759
Roe_deer_Reticulum-2 RPKM	2096.34	134.923	89.94	13.264	100.636	8.61402	1.05126	47.3518	1.32121	0.24893	0.330278	0	42.4014
Roe_deer_Reticulum-3 RPKM	2232.14	182.267	2.2632	0.995897	78.3369	9.31971	8.61724	19.8166	1.71849	125.878	7.40951	0	518.627
Roe_deer_Reticulum-4 RPKM	3722.55	190.121	8.88252	33.4062	58.6623	33.8517	0.00937589	24.4546	1.58966	0.0393777	0.000726041	0.00133914	28.2687
Roe_deer_Reticulum-5 RPKM	2019	495.927	88.2106	5.225	166.199	8.78576	7.32354	10.1094	7.88298	0.232355	0.7508	0	726.704
Sheep_Reticulum-1 RPKM	1173.18	783.887	173.25	167.246	14.5829	81.3481	11.2785	2.94722	10.4951	0.0990984	14.2501	0.0304901	78.316
Sheep_Reticulum-2 RPKM	1689.5	856.454	52.0362	5.03052	34.2235	17.5222	40.9435	5.91875	3.32943	0.051956	5.81705	0.0104906	168.593
Sheep_Reticulum-3 RPKM	882.634	315.356	82.8137	10.1608	17.9852	1721.54	26.8311	5.50445	8.65646	0.559382	2.35689	0.0081036	61.6807
Sheep_Reticulum-4 RPKM	1753.06	405.416	184.916	9.71874	24.1737	13.8947	39.488	14.0765	16.2011	0.0319347	8.30234	0.010891	170.986
Sheep_Reticulum-5 RPKM	1336.7	679.786	142.456	58.0784	15.9469	71.3506	24.5171	2.7652	35.681	0.133459	7.12477	0.0117835	153.719
Water_buffalos_Reticulum-1 RPKM	1696.01	726.437	105.949	38.0023	86.1494	41.9962	10.1238	8.3098	5.79313	0.428422	0.317365	0.00265997	81.3595
Water_buffalos_Reticulum-2 RPKM	1756.64	331.956	70.5644	6.72841	8.48841	16.3625	22.7671	14.9636	5.50285	0.430824	4.11982	0	245.28
Water_buffalos_Reticulum-3 RPKM	1571.93	367.828	98.4807	3.63466	123.557	12.5648	53.038	64.5342	3.84072	0.958115	4.01229	0.000987408	164.599
Water_buffalos_Reticulum-4 RPKM	1490.99	1177.46	82.0447	11.5031	0.561208	3.32349	41.6035	41.4637	12.3531	0.179755	0.960469	0	229.138
Water_buffalos_Reticulum-5 RPKM	1667.43	569.442	177.499	9.91603	87.0793	4.85755	67.7339	112.622	15.7456	0.682761	8.99111	0	274.068
Water_deer_Reticulum-1 RPKM	3163.94	259.799	53.2385	0.718044	26.1886	22.7393	0.851265	20.7997	2.4945	0.0320337	0.378798	0.310994	83.1375
Water_deer_Reticulum-2 RPKM	3612.62	271.036	10.6611	0.134697	6.93722	8.26321	0.302861	32.1935	0.22085	0.00875549	0.0571884	0.0385097	31.6004
Water_deer_Reticulum-3 RPKM	3599.07	168.833	5.27179	0.487374	6.57086	7.44285	0.265813	51.4348	0.407433	0.0094118	0.147881	0.0153769	29.1879
Water_deer_Reticulum-4 RPKM	3083.89	103.154	61.7472	0.165518	20.6229	15.5205	0.0466761	0.901201	6.92936	0.00462688	0.0949865	0	28.6257
Water_deer_Reticulum-5 RPKM	2384.25	392.16	65.0368	0.307388	3.86617	12.7536	0.489107	20.0893	1.76909	0.00564089	0.0906775	0.0128249	387.15
Yak_Reticulum-1 RPKM	1620.93	149.113	47.3927	24.7222	161.472	5.48902	29.1808	15.1782	27.6616	0.231113	0.932716	0	150.819
Yak_Reticulum-2 RPKM	1856.51	121.843	42.945	5.49674	48.2529	4.53849	35.6694	72.4826	2.22309	0.414305	0.761179	0	238.425
Yak_Reticulum-3 RPKM	1902.04	185.455	64.5947	20.4172	132.648	4.09305	54.8577	10.7001	13.4776	0.0217895	2.33772	0	208.514
Yak_Reticulum-4 RPKM	1664.21	200.318	40.1324	1.37347	50.7387	9.10589	15.9636	33.4427	6.03023	0.905983	0.900426	0	284.093
Yak_Reticulum-5 RPKM	1528.39	248.722	20.0716	2.01122	119.072	7.00374	49.7155	13.6524	111.751	0.841685	0.897111	0.00201501	200.803
Dairy_cattle_Omasum-1 RPKM	1815.97	732.161	41.335	21.7626	23.1982	51.7997	19.1734	13.6315	4.27637	0.07331	0.824685	0	73.746
Dairy_cattle_Omasum-2 RPKM	1632.71	792.287	39.1223	17.2042	19.1545	38.9355	40.8033	25.7147	5.62816	0.0792113	0.428844	0.00107124	78.2073
Dairy_cattle_Omasum-3 RPKM	1556.46	712.207	46.7517	17.6887	35.8139	33.8586	37.7078	40.242	6.60344	0.0741246	0.738355	0.00248516	84.7078
Dairy_cattle_Omasum-4 RPKM	1762.69	755.046	34.7012	14.2987	21.5734	42.7823	24.4272	41.2643	3.20362	0.0849999	0.840828	0.00144486	62.7475
Dairy_cattle_Omasum-5 RPKM	1676.01	655.928	57.7543	32.49	33.0762	35.9816	50.1043	19.8276	4.99134	0.0775398	0.450797	0	76.0567
Dairy_cattle_Omasum-6 RPKM	1681.89	634.772	69.0469	14.4727	22.4559	28.3923	36.0128	23.325	4.35554	0.0639188	0.648138	0	82.9285
Goat_Omasum-1 RPKM	1765.92	624.365	109.893	13.9177	2.31317	31.1095	6.62085	12.1414	4.30601	47.7385	1.1401	0.0010339	122.388
Goat_Omasum-2 RPKM	2205.01	615.441	54.5082	23.8725	1.49091	20.0383	12.611	8.10104	20.0715	14.8964	7.2392	0.00123497	153.623
Goat_Omasum-3 RPKM	2044.06	471.286	113.764	14.239	1.71425	31.8165	15.5992	3.34501	11.0872	27.9455	0.786126	0.00106737	107.345
Goat_Omasum-4 RPKM	1559.6	654.2	97.8922	23.1049	5.359	191.507	15.2558	2.83208	6.91198	36.7621	0.855277	0.000438614	222.865
Goat_Omasum-5 RPKM	1547.18	885.699	131.663	64.3967	66.6472	133.706	27.7669	9.31495	21.5664	152.257	4.72555	0.00267273	334.263
Goat_Omasum-6 RPKM	1875.5	469.908	77.7493	31.6308	55.1317	144.63	12.1681	5.46848	32.079	17.344	11.2887	0.000433439	132.165
Roe_deer_Omasum-1 RPKM	2833.64	179.78	14.0644	2.8999	0.548826	7.85797	5.33276	12.6102	1.20852	0.492589	0.579109	0	30.3136
Roe_deer_Omasum-2 RPKM	1657.14	238.153	95.9302	10.2306	44.89	16.0458	1.54643	68.3682	3.93162	0.162209	0.117122	0	65.5969
Roe_deer_Omasum-3 RPKM	2149.02	305.378	2.72796	0.478459	113.203	7.03656	7.98283	31.0031	2.58249	40.2787	6.74363	0	719.337
Roe_deer_Omasum-4 RPKM	3316.44	326.22	11.2608	64.0404	28.5398	44.5474	0.0132927	29.1786	5.62211	0.192447	0.00353951	0	36.9475
Roe_deer_Omasum-5 RPKM	2085.71	448.806	125.179	4.03015	83.9447	12.1076	5.34806	7.33216	9.68632	0.122007	0.131026	0	535.437
Sheep_Omasum-1 RPKM	1253.37	920.36	173.618	192.513	19.9813	62.0175	15.9835	2.84029	4.07348	0.054283	24.5971	0.00644108	83.0652
Sheep_Omasum-2 RPKM	1653.31	1321.14	58.5003	7.33598	18.6272	44.5749	17.7945	3.41937	14.1416	0.0602972	8.31278	0.00603377	180.794
Sheep_Omasum-3 RPKM	1436.88	565.021	146.609	25.4645	25.6757	899.073	19.6906	9.90512	6.22655	0.217704	8.16878	0.0249139	83.535
Sheep_Omasum-4 RPKM	1671.86	691.392	101.464	18.9025	8.72067	29.3398	18.7865	7.68463	14.132	0.0707918	13.9993	0.00600611	183.888
Sheep_Omasum-5 RPKM	1449.95	613.7	266.545	101.011	13.0251	39.8543	25.4543	2.87232	9.8726	0.0931288	11.5682	0.00839674	186.023
Water_buffalos_Omasum-1 RPKM	2085.18	931.147	124.387	38.9941	2.45865	8.83389	9.30729	7.31413	5.4126	0.0442111	0.30669	0	51.8404
Water_buffalos_Omasum-2 RPKM	1897.59	341.556	67.3248	9.30662	8.50075	16.223	30.8948	15.7076	4.41791	0.0581323	8.0289	0	357.592
Water_buffalos_Omasum-3 RPKM	1992.98	347.154	38.6022	2.53257	91.8735	20.9784	38.9301	68.6394	2.99936	0.618568	8.86998	0	133.814
Water_buffalos_Omasum-4 RPKM	1282.36	1227.2	60.4502	20.5312	1.33837	3.14001	38.2563	24.2865	30.6274	0.0417794	1.31046	0	270.46
Water_buffalos_Omasum-5 RPKM	1954.68	673.491	135.97	7.28771	48.0965	4.63663	32.3031	124.875	14.3924	0.193483	20.3198	0	361.569
Water_deer_Omasum-1 RPKM	3012.9	126.608	29.5517	0.395605	4.52147	3.52574	7.78242	66.1972	1.45583	0.0189168	0.197083	0.00318247	46.5938
Water_deer_Omasum-2 RPKM	3478	164.126	28.2969	0.446104	28.8451	21.7639	2.30752	45.797	2.08301	0.034087	0.253542	0.237963	42.0784
Water_deer_Omasum-3 RPKM	3673.97	137.232	4.98277	0.411535	4.25328	7.95708	0.301422	42.1183	0.192729	0.00664878	0.064366	0.0507311	25.7441
Water_deer_Omasum-4 RPKM	3044.26	110.786	58.7289	0.200135	24.4353	10.7352	0.0399564	1.23406	5.82147	0.004944	0.0831878	0.00924064	24.5963
Water_deer_Omasum-5 RPKM	2828.42	310.986	98.1821	0.531839	2.96432	2.88879	0.173438	28.363	0.931252	0.00209174	0.0325775	0.0164675	164.962
Yak_Omasum-1 RPKM	1689.49	152.932	52.4692	19.4243	175.815	4.18464	26.4547	13.8567	26.0058	0.0687747	1.19185	0	168.13
Yak_Omasum-2 RPKM	1895.49	135.54	47.3314	6.34835	52.582	2.1613	28.6598	67.4967	1.85049	0.0738292	0.880812	0	278.282
Yak_Omasum-3 RPKM	1867.13	279.111	61.001	19.6428	135.896	4.76868	74.9498	16.8634	12.7418	0.0467625	2.83552	0	267.828
Yak_Omasum-4 RPKM	1483.38	204.738	44.422	5.05343	70.1369	3.30984	26.1069	52.5437	5.03142	1.72303	1.27903	0	613.529
Yak_Omasum-5 RPKM	1035.77	305.735	30.9071	2.37962	125.425	1.53536	35.9806	22.18	99.3773	0.549891	0.879551	0	289.849
Dairy_cattle_Abomasum-1 RPKM	1659.26	625.471	21.0244	9.11302	30.7289	30.4873	38.9481	18.9313	2.81795	0.0402601	1.06326	0.00250404	100.944
Dairy_cattle_Abomasum-2 RPKM	1297.64	990.35	25.6221	12.303	7.99584	64.5323	52.5312	20.2699	2.52806	0.115027	0.590062	0	83.9173
Dairy_cattle_Abomasum-3 RPKM	1525.11	664.409	32.6701	13.1878	23.4022	46.9658	42.9818	28.8111	3.0296	0.0632723	0.586498	0.000770999	73.0655
Dairy_cattle_Abomasum-4 RPKM	1850.63	478.545	17.0633	7.77493	23.8646	30.0516	21.3401	34.8233	1.69736	0.0267685	1.6528	0.00491252	73.1849
Dairy_cattle_Abomasum-5 RPKM	1714.17	616.36	27.1701	18.191	28.1172	45.194	46.0691	12.9455	2.88469	0.0629926	1.04558	0.00057806	85.9641
Dairy_cattle_Abomasum-6 RPKM	1623.11	628.094	23.8815	5.88131	26.5656	33.0899	57.828	20.6011	2.61829	0.0324033	1.03096	0.00188542	89.936
Goat_Abomasum-1 RPKM	2004.15	396.265	43.1405	6.40994	5.39779	15.3469	26.7516	21.2189	2.92708	76.9351	6.46753	0.000379667	81.2268
Goat_Abomasum-2 RPKM	2114.18	267.103	23.2877	3.93546	14.4437	7.31996	37.1947	15.2654	4.25543	44.883	3.63695	0.0115983	69.3299
Goat_Abomasum-3 RPKM	1965.16	380.843	108.743	5.29808	2.14219	22.5038	33.6402	5.86114	1.79839	32.6981	1.39927	0.000417734	83.1369
Goat_Abomasum-4 RPKM	1605.4	279.038	40.8385	5.99401	19.4671	60.9533	73.3798	4.91987	3.03688	125.195	19.3767	0.00530961	141.48
Goat_Abomasum-5 RPKM	1330.43	923.842	106.329	18.7877	55.7444	126.233	88.3593	8.83932	6.28257	215.891	15.3324	0.0029172	276.912
Goat_Abomasum-6 RPKM	1932.93	283.488	62.5699	16.1332	127.512	69.3505	73.7121	8.63797	16.3322	55.274	13.7587	0.00745684	133.573
Roe_deer_Abomasum-1 RPKM	2724.43	347.382	10.6705	1.82475	1.11472	8.84051	2.61844	4.31776	0.808412	2.20633	2.3361	0	27.6813
Roe_deer_Abomasum-2 RPKM	2091.46	169.534	20.7092	5.90902	40.5943	6.57338	0.866727	23.8198	1.27682	0.213802	0.429662	0	66.1501
Roe_deer_Abomasum-3 RPKM	1780.07	151.367	3.25417	0.394313	33.1058	4.73734	4.10428	7.41865	0.707136	41.9895	2.45217	0	225.981
Roe_deer_Abomasum-4 RPKM	2664.25	234.206	4.87424	31.123	34.1103	22.3549	0.0227356	4.30871	0.883498	0.122788	0.00149382	0.00121803	18.7225
Roe_deer_Abomasum-5 RPKM	2323.73	403.051	59.1707	2.42496	42.425	14.309	2.73571	1.7188	4.31308	0.11631	0.0889143	0	338.459
Sheep_Abomasum-1 RPKM	919.862	438.968	196.303	65.9498	67.0298	34.4966	13.3147	3.84832	4.91392	0.0357626	14.5837	0.0626768	100.662
Sheep_Abomasum-2 RPKM	1003.83	576.122	96.7323	5.35818	88.1591	12.3079	10.0973	4.26305	13.1612	0.0172647	3.23052	0.00915748	243.332
Sheep_Abomasum-3 RPKM	344.257	169.17	79.3342	7.07228	84.0479	74.3312	7.78001	3.14486	2.59118	0.084382	1.00906	0.079945	44.5399
Sheep_Abomasum-4 RPKM	1397.4	289.587	171.795	10.1352	30.2045	19.9028	40.4976	6.26357	21.1262	0.0155969	8.47221	0.00428604	210.56
Sheep_Abomasum-5 RPKM	1367.93	423.586	75.3631	38.2243	38.2034	26.0963	15.9965	3.77793	14.7942	0.0429473	11.1474	0.0176913	197.365
Water_buffalos_Abomasum-1 RPKM	1101.08	1080.5	107.059	37.5821	86.9678	42.8323	13.698	6.91428	4.49129	0.274269	0.184346	0.00168637	68.0004
Water_buffalos_Abomasum-2 RPKM	1833.23	361.886	27.1265	2.16538	7.58361	27.8314	20.5588	10.1903	4.72009	0.252969	2.49685	0	169.912
Water_buffalos_Abomasum-3 RPKM	1775.66	457.224	41.8648	1.4414	83.9004	50.9311	32.215	55.1246	2.39837	1.26286	5.02414	0	143.792
Water_buffalos_Abomasum-4 RPKM	1274.49	1289.72	48.5799	29.5517	1.17412	5.3598	42.9613	20.9645	6.71325	0.0310149	1.55158	0.00774748	464.11
Water_buffalos_Abomasum-5 RPKM	1863.67	653.157	85.031	5.30586	43.811	11.868	36.6213	59.3435	6.55348	1.36095	9.92326	0	457.799
Water_deer_Abomasum-1 RPKM	3015.41	102.537	5.92092	0.168903	7.43136	3.8797	5.97349	19.4711	1.44175	0.0131499	0.279428	0	39.2932
Water_deer_Abomasum-2 RPKM	3670.5	233.733	6.33854	0.055568	6.06606	6.74308	0.16774	26.3949	0.178447	0.00705253	0.0644894	0.0351935	30.2701
Water_deer_Abomasum-3 RPKM	3269.45	267.576	31.8088	0.412825	24.8996	29.2579	2.27785	22.3132	1.49065	0.0419631	0.347425	0.376841	95.1183
Water_deer_Abomasum-4 RPKM	2945.88	103.742	120.047	0.0622932	27.1242	19.2761	0.595655	1.38188	3.53834	0.0103443	0.184958	0.000442777	31.9662
Water_deer_Abomasum-5 RPKM	2670.02	431.422	38.9367	0.275966	5.08648	2.84335	0.109005	20.2455	0.896851	0.00791308	0.0554891	0.0113105	242.89
Yak_Abomasum-1 RPKM	1507.72	204.985	31.6365	17.3847	121.844	9.80876	26.7187	6.81514	30.9231	0.532734	0.841002	0	131.693
Yak_Abomasum-2 RPKM	1811.19	191.555	34.5675	5.01642	49.4515	6.61718	39.1108	36.4469	1.93195	0.379905	0.898444	0	274.096
Yak_Abomasum-3 RPKM	2160.13	304.305	24.8154	3.15126	104.614	30.662	40.8657	11.6595	30.9367	0.0761889	2.32976	0.0028678	166.814
Yak_Abomasum-4 RPKM	1310.55	233.76	45.5842	1.41569	51.8378	6.4897	18.364	30.9732	4.50824	2.36749	0.917092	0	391.147
Yak_Abomasum-5 RPKM	1013.77	286.07	20.7849	1.26684	139.927	2.67803	69.243	7.80736	141.613	0.692925	0.468037	0.00210462	212.141
Dairy_cattle_Duodenum-1 RPKM	181.654	428.49	28.5353	25.8728	51.86	4.95925	64.23	33.2832	13.5941	0.0326534	0.0111346	0.000772176	77.3711
Dairy_cattle_Duodenum-2 RPKM	396.448	894.86	73.6496	57.2726	32.0288	42.2719	96.7351	22.6453	8.63659	0.102151	0.0892849	0	97.9567
Dairy_cattle_Duodenum-3 RPKM	322.225	398.456	56.2824	15.1277	31.9175	1.81263	29.712	54.88	8.72716	0.0268685	0.0036415	0.000785933	35.0768
Dairy_cattle_Duodenum-4 RPKM	625.793	1632.69	48.841	44.9698	11.4585	71.0461	10.6403	24.2002	4.7732	0.230476	0.975697	0	81.2841
Dairy_cattle_Duodenum-5 RPKM	696.101	1029.97	60.2685	78.1542	18.2492	46.7424	35.7513	11.3136	6.11683	0.170699	0.34782	0	88.6333
Dairy_cattle_Duodenum-6 RPKM	329.377	515.966	25.6334	28.556	67.7752	3.62651	64.3301	79.9943	11.7784	0.0353698	0.012539	0.0126396	96.4524
Goat_Duodenum-1 RPKM	580.897	738.276	397.536	313.696	23.1683	18.5616	103.272	23.8399	173.665	26.3684	0.999783	0.00445674	597.587
Goat_Duodenum-2 RPKM	537.429	950.331	109.269	417.382	34.4513	11.1208	45.184	8.5637	134.192	7.84632	0.830518	0	142.459
Goat_Duodenum-3 RPKM	290.571	511.97	245.937	267.749	8.66086	17.3575	92.9838	2.05227	121.583	47.5669	0.163699	0.0955961	411.639
Goat_Duodenum-4 RPKM	1139.14	431.018	92.5968	26.1806	16.0901	262.517	54.9786	1.11211	27.9265	163.516	1.80797	0.114073	116.287
Goat_Duodenum-5 RPKM	1396.11	833.736	155.165	22.9849	61.2854	86.4347	91.4514	10.2275	3.29243	241.728	16.6961	0.0033459	315.181
Goat_Duodenum-6 RPKM	1074.78	536.32	81.0827	42.2328	142.256	210.742	71.2319	5.4385	10.3942	18.3456	8.06232	0.00807383	189.299
Roe_deer_Duodenum-1 RPKM	2719.95	323.287	10.2108	1.82049	3.44982	10.1338	2.21576	3.64009	0.775587	2.39716	1.98972	0	25.7108
Roe_deer_Duodenum-2 RPKM	1518.15	545.111	146.67	78.6812	4.96861	14.3982	0.210518	21.6286	2.40286	0.197504	0.107474	0	93.6839
Roe_deer_Duodenum-3 RPKM	1696.49	334.245	15.0309	3.69208	103.686	20.7137	12.7813	7.16643	2.0589	6.77609	7.60088	0	191.959
Roe_deer_Duodenum-4 RPKM	617.692	166.297	5.91734	41.5678	157.153	0	5.03473	1.65942	0	7.77574	0	0	89.8136
Roe_deer_Duodenum-5 RPKM	417.712	99.198	15.0157	10.6449	388.244	0.422845	0.320797	5.74491	4.31696	0.644458	0.314016	0	80.2408
Sheep_Duodenum-1 RPKM	436.196	352.289	738.585	124.474	246.41	4.17043	1.66792	0.701806	21.2132	0.0151782	0.0321607	0.0156697	148.767
Sheep_Duodenum-2 RPKM	295.427	596.472	40.7275	55.0897	131.688	4.41414	0.932679	0.216457	10.831	0.0210309	0.0271717	0.0309756	115.324
Sheep_Duodenum-3 RPKM	396.588	915.181	126.73	30.0492	110.928	426.706	42.1184	1.87643	9.19349	1.54756	0.431776	0.0407819	188.219
Sheep_Duodenum-4 RPKM	291.913	938.068	159.254	133.811	130.706	2.80873	11.5107	0.388542	51.0934	0.0350611	0.0224406	0.014201	196.945
Sheep_Duodenum-5 RPKM	511.641	204.698	133.378	38.9284	203.011	1.51174	6.10084	0.547055	53.7752	0.0223779	0.0176253	0.00316305	372.919
Water_buffalos_Duodenum-1 RPKM	876.821	580.693	38.713	34.0544	69.0886	36.3096	21.5721	1.90238	46.9374	0.705889	1.1977	0	199.519
Water_buffalos_Duodenum-2 RPKM	320.392	623.644	55.3605	19.4308	16.5666	311.031	90.2715	1.64943	32.5311	0.0627281	0.133532	0.189668	580.615
Water_buffalos_Duodenum-3 RPKM	579.919	191.703	48.5488	0.592849	59.1341	119.07	171.448	64.52	6.17659	2.44244	0	0	166.85
Water_buffalos_Duodenum-4 RPKM	391.53	504.063	68.9352	62.9655	2.81478	0.322336	360.495	0.426232	55.5949	0	0	0	923.744
Water_buffalos_Duodenum-5 RPKM	793.714	773.92	59.926	15.1284	21.2545	25.5222	50.6354	17.097	30.7246	0.295846	0.995325	0	728.154
Water_deer_Duodenum-1 RPKM	1755.36	601.059	84.1909	9.1531	32.9604	10.0309	18.7645	55.0071	58.6466	0	0	0	94.4116
Water_deer_Duodenum-2 RPKM	3179.23	237.306	60.5908	0.593531	30.66	26.3442	3.86373	10.4024	1.52561	0.00821514	0.10295	2.8998	109.265
Water_deer_Duodenum-3 RPKM	2385.22	499.328	44.3276	0	9.69875	17.1313	0.15259	49.8576	2.80337	0	0	0	111.889
Water_deer_Duodenum-4 RPKM	1776.31	301.091	74.7988	2.46762	17.7801	14.0781	0.0561126	16.9576	5.74577	0	0	0.390805	90.1796
Water_deer_Duodenum-5 RPKM	459.47	933.142	141.027	6.03941	4.33766	7.69674	0.541773	30.0007	6.37496	0	0	0.526379	784.919
Yak_Duodenum-1 RPKM	172.765	601.648	16.1711	90.6186	14.6065	1.43297	147.124	0.29528	226.956	0.0773145	0	0	152.202
Yak_Duodenum-2 RPKM	651.814	198.942	20.3605	21.0311	26.359	10.5907	34.9789	7.01149	18.9923	1.15444	0.202591	0	284.543
Yak_Duodenum-3 RPKM	1343.75	173.529	22.9047	3.53869	50.993	0.894731	9.0446	1.34402	145.406	0.0190635	0.00687985	0.00198094	69.9509
Yak_Duodenum-4 RPKM	669.564	320.368	76.3359	25.6124	113.83	9.92053	95.2543	8.02831	60.6803	0.246041	0	0	195.767
Yak_Duodenum-5 RPKM	464.767	266.356	14.3504	6.22475	53.0032	1.52858	16.1698	2.33388	142.819	0.451216	0	0	126.646
Dairy_cattle_Jejunum-1 RPKM	190.066	383.713	30.9045	33.0946	36.6095	4.97788	36.0176	31.3637	13.0657	0.0298922	0.000489162	0.00356402	97.6432
Dairy_cattle_Jejunum-2 RPKM	805.68	507.719	45.6959	35.1723	28.8929	32.5241	15.674	34.1299	10.0789	0.0525662	0.166008	0.00355708	63.7583
Dairy_cattle_Jejunum-3 RPKM	407.05	435.588	42.1138	19.8766	30.8174	3.02509	78.7124	70.8644	11.9474	0.0438317	0	0.0284314	88.4627
Dairy_cattle_Jejunum-4 RPKM	221.96	393.231	59.2344	45.0915	66.7637	7.0832	95.3452	97.3535	15.5677	0.013026	0	0	61.353
Dairy_cattle_Jejunum-5 RPKM	302.291	434.989	36.5553	42.4926	57.513	7.72544	177.924	121.518	8.87218	0.0164567	0	0.0320239	63.5992
Dairy_cattle_Jejunum-6 RPKM	279.29	395.379	24.753	30.7695	53.9659	3.28076	37.3166	92.9067	11.5442	0.0282354	0	0	1052.69
Goat_Jejunum-1 RPKM	305.417	1356.47	399.374	565.37	19.773	5.23433	27.4695	17.4059	88.9539	18.3731	0.0696287	0.0107034	248.477
Goat_Jejunum-2 RPKM	126.047	1245.21	267.428	590.637	20.0695	1.95003	52.2115	18.9573	220.602	4.28025	0.0377552	0.160921	178.998
Goat_Jejunum-3 RPKM	98.5297	838.217	527.898	252.182	3.48023	5.85657	82.865	0.75408	53.5555	6.7375	0.00638452	0.0176561	406.484
Goat_Jejunum-4 RPKM	82.6728	886.935	294.13	433.281	142.427	1.22948	16.0477	1.55166	110.783	16.5516	0.0060634	0.0049383	118.383
Goat_Jejunum-5 RPKM	290.387	703.106	111.844	311.221	160.697	11.3661	35.9467	4.83003	96.6006	21.5168	0.0283042	0.0312896	302.918
Goat_Jejunum-6 RPKM	36.4754	667.636	276.013	501.823	57.1043	2.29703	21.1441	5.1549	296.218	21.5661	0.0128996	0.00126511	696.077
Roe_deer_Jejunum-1 RPKM	316.018	206.996	61.7993	20.3347	124.177	4.27116	2.77969	0.0785811	24.9697	0.218764	0.0152016	0	12.469
Roe_deer_Jejunum-2 RPKM	1257.74	104.339	65.306	49.8948	113.781	0.988726	0.0782368	0.174949	8.8012	0.0817508	0	0	18.1953
Roe_deer_Jejunum-3 RPKM	448.873	1202.47	20.9012	8.80721	165.066	0.856354	0.445016	0.0640011	23.3335	0.615914	0.182691	0	90.3255
Roe_deer_Jejunum-4 RPKM	59.1403	327.377	112.405	110.294	32.0644	0.124621	0.00535252	0.0618421	52.1604	0.140771	0	0	108.607
Roe_deer_Jejunum-5 RPKM	114.353	116.755	92.5258	4.56255	78.5697	0.177951	0.0242074	0.0999505	60.7157	0.207372	0	0	15.263
Sheep_Jejunum-1 RPKM	796.622	248.414	873.4	2105.39	211.491	1.64554	1.16097	0.0762665	24.5181	0.0115106	0.00296667	0	96.4042
Sheep_Jejunum-2 RPKM	605.134	1121.84	136.222	246.904	103.966	3.06981	2.53841	0.242107	12.8657	0.07627	0.0849968	0.00639952	112.003
Sheep_Jejunum-3 RPKM	460.667	744.447	344.636	70.1641	283.275	5.39226	5.96614	4.14508	57.6283	0.326586	0.0787756	0.0214761	268.277
Sheep_Jejunum-4 RPKM	292.668	541.944	376.303	462.675	93.0734	3.41315	5.0988	0.296708	43.4233	0.0375072	0.0420822	0.0157719	214.007
Sheep_Jejunum-5 RPKM	317.724	201.804	315.055	1420.71	135.564	0.936792	0.653066	0.087962	33.8899	0.0239221	0.00407999	0.000721545	119.405
Water_buffalos_Jejunum-1 RPKM	209.416	413.099	30.1279	83.2044	110.156	19.4224	32.0471	2.6357	7.35546	0	0	0	75.3426
Water_buffalos_Jejunum-2 RPKM	411.808	639.576	27.606	17.4622	7.83819	435.201	150.004	4.0328	14.9942	0.0528871	0.568428	0.0189925	392.452
Water_buffalos_Jejunum-3 RPKM	1474.45	201.56	26.3781	4.32653	10.325	41.7157	139.164	16.8002	3.59665	0	0.590183	0	117.958
Water_buffalos_Jejunum-4 RPKM	942.943	763.995	25.1408	47.7854	0.462258	5.92743	94.7304	2.72414	29.4056	0	1.342	0	1400.27
Water_buffalos_Jejunum-5 RPKM	546.583	216.93	19.5208	32.5545	27.3639	11.1119	77.6853	3.38876	13.537	0.740285	0.236536	0.00553515	963.139
Water_deer_Jejunum-1 RPKM	1669.04	199.933	97.2633	9.51837	74.2326	1.512	258.543	3.20205	24.245	0	0	0	94.1744
Water_deer_Jejunum-2 RPKM	3144.94	444.94	62.5606	1.45459	129.398	39.204	8.54323	9.87387	3.25645	0.00427005	0.00604014	4.07595	239.689
Water_deer_Jejunum-3 RPKM	4814.89	153.472	20.7559	6.24171	16.8988	11.3121	11.8667	3.68322	4.97267	0.0169532	0	2.10425	48.4552
Water_deer_Jejunum-4 RPKM	3051.4	144.164	10.0964	4.69711	80.7056	45.3662	0.0400742	7.14018	231.495	0.0717137	0	0	244.636
Water_deer_Jejunum-5 RPKM	390.326	62.1391	116.964	10.0145	23.8989	0.21173	7.17437	0.228257	23.3961	0	0	0.328455	1864.1
Yak_Jejunum-1 RPKM	221.285	537.122	15.0228	100.385	20.9423	0.225598	86.2256	3.60954	210.968	0.0140372	0.055429	0	173.233
Yak_Jejunum-2 RPKM	809.427	136.347	3.33054	14.698	19.0153	0.298497	14.0166	0.467911	24.2898	0.00839173	0	0	696.712
Yak_Jejunum-3 RPKM	1333.47	196.22	27.5644	2.94012	56.2878	1.31101	12.2444	1.45633	129.228	0	0	0	79.6697
Yak_Jejunum-4 RPKM	924.138	218.394	33.8295	5.1059	123.705	0	20.7633	15.2452	58.0087	0	0	0	283.109
Yak_Jejunum-5 RPKM	361.539	265.714	13.5066	5.11534	73.0116	0.72336	7.35656	1.08392	152.935	0.31057	0.00468443	0	135.523
Dairy_cattle_Ileum-1 RPKM	516.075	535.306	26.3509	22.3852	88.5976	11.5463	170.231	23.8248	17.6703	0.0238927	0.08612	0.511032	229.899
Dairy_cattle_Ileum-2 RPKM	407.309	638.994	32.5119	28.9129	19.6512	33.8664	68.6875	28.7785	11.1296	0	0	0.431185	175.437
Dairy_cattle_Ileum-3 RPKM	422.559	374.13	45.713	17.8024	37.5467	2.96501	58.3649	65.2025	13.1787	0.0187803	0.00676926	0.00546603	124.4
Dairy_cattle_Ileum-4 RPKM	296.655	421.082	36.5192	37.8015	54.5283	10.1656	43.6024	149.048	14.7891	0.0427801	0	0.145648	100.859
Dairy_cattle_Ileum-5 RPKM	426.992	378.797	22.0833	22.7391	36.5379	4.34659	231.065	22.9583	13.7169	0.0202985	0.117405	2.26835	206.378
Dairy_cattle_Ileum-6 RPKM	553.611	530.32	30.5962	45.1746	34.4474	4.30178	44.2331	8.33679	13.1824	0	0.102176	0.0268765	210.819
Goat_Ileum-1 RPKM	418.111	1062.84	297.04	341.465	36.8616	3.7478	50.0705	29.61	121.024	23.118	0.0122898	0.00197974	227.182
Goat_Ileum-2 RPKM	58.1059	937.394	409.231	745.245	9.30759	1.39759	3.49001	13.7852	187.489	0.722644	0.00356196	0	164.92
Goat_Ileum-3 RPKM	75.8564	1201.12	523.333	342.239	3.79378	8.52334	58.1463	1.48549	56.4486	3.00446	0.00474691	0	209.29
Goat_Ileum-4 RPKM	52.1047	1496.49	259.82	273.714	60.9786	2.57781	24.9826	1.96662	262.489	3.97858	0.0418479	0.00491535	197.573
Goat_Ileum-5 RPKM	316.103	1030.41	146.023	470.639	113.782	6.27733	145.43	14.7322	101.206	6.33866	0.0867606	0.145796	494.826
Goat_Ileum-6 RPKM	55.5356	1009.44	164.967	509.532	9.74586	3.59569	38.616	19.3826	343.028	17.5713	0.0530181	0.00496139	440.646
Roe_deer_Ileum-1 RPKM	436.824	229.578	45.0507	23.1466	18.5878	4.53975	7.10138	2.30663	23.6704	0.463473	0	0	32.9782
Roe_deer_Ileum-2 RPKM	1258.7	1268.48	31.527	3.16202	68.4148	2.58424	0.174383	13.0301	1.88997	0.667442	0.505528	0.0340169	189.876
Roe_deer_Ileum-3 RPKM	1754.49	241.542	36.6273	17.0077	78.9376	6.70647	1.66343	14.6519	12.8373	0	0	0	149.304
Roe_deer_Ileum-4 RPKM	111.66	407.273	128.549	157.768	30.7845	0.71626	0.0941505	0.225372	60.013	0.0347708	0.358992	0	145.945
Roe_deer_Ileum-5 RPKM	183.224	180.959	47.7596	6.62448	24.4642	0.106818	0.0183063	0.0380745	30.1038	0.048572	0	0	13.2855
Sheep_Ileum-1 RPKM	688.87	376.781	586.342	1782.85	202.175	4.82953	2.04554	0.20208	16.6385	0.014786	0.0164263	0.0196597	66.6652
Sheep_Ileum-2 RPKM	256.971	1107.7	167.169	205.968	115.859	1.8868	4.88676	0.0681846	36.8628	0.298018	0.0433774	0.00285917	197.688
Sheep_Ileum-3 RPKM	352.255	693.039	335.402	59.2917	224.632	12.6929	6.45205	2.98154	51.4914	0.581946	0.078335	0.0123386	241.051
Sheep_Ileum-4 RPKM	335.859	552.827	309.709	395.477	65.4864	1.24717	5.82201	0.0772116	66.2359	0.024383	0.0116969	0.00174566	211.879
Sheep_Ileum-5 RPKM	367.116	270.277	353.643	1224.61	162.774	1.56155	2.27735	0.108683	23.0769	0.0460943	0.00478628	0.0075949	199.901
Water_buffalos_Ileum-1 RPKM	109.34	244.984	29.1045	53.7164	279.02	9.4374	16.6889	0.175375	7.87627	0.039526	0.185851	0.040842	54.3388
Water_buffalos_Ileum-2 RPKM	335.109	402.75	37.1762	15.9617	20.5859	88.562	75.6549	1.62932	67.6912	0.0916007	0.36745	0.623106	503.406
Water_buffalos_Ileum-3 RPKM	1455.29	247.415	97.5405	3.33719	20.2761	23.8397	54.9978	68.5783	14.9398	0.316737	3.36184	0	146.532
Water_buffalos_Ileum-4 RPKM	861.762	522.575	7.6417	31.6356	4.04409	1.12575	92.9218	0.775489	16.7229	0	0	0.283842	1756.19
Water_buffalos_Ileum-5 RPKM	635.124	362.781	8.61886	20.8516	22.2711	2.70247	73.206	1.911	26.065	0.381813	0.0887499	0	1456.1
Water_deer_Ileum-1 RPKM	2125.46	290.152	60.3258	3.2727	66.7633	2.89227	64.1109	3.17233	30.379	0.0104709	0	0.0101879	81.8495
Water_deer_Ileum-2 RPKM	4926.08	462.392	50.4048	5.39206	306.77	68.2179	11.6662	4.11612	23.9138	0.0367394	0	4.05067	242.687
Water_deer_Ileum-3 RPKM	6579.11	744.428	18.2755	9.63595	105.597	20.0021	0.76755	2.28115	14.1291	0.0353873	0.00290504	32.7848	60.6339
Water_deer_Ileum-4 RPKM	3821.96	139.411	3.9864	1.15015	21.9116	45.9087	0.0232984	0.755331	356.019	0.0259758	0	0.149988	70.8435
Water_deer_Ileum-5 RPKM	448.954	80.2712	125.608	8.83926	7.40727	0.19556	3.81461	1.86135	35.2289	0.00753632	0	0.555502	539.004
Yak_Ileum-1 RPKM	1321.64	338.198	60.0293	46.8025	155.366	11.8942	15.2912	5.7903	13.5445	1.08205	1.41093	0	231.274
Yak_Ileum-2 RPKM	1048.96	274.476	12.8014	18.1033	37.9657	0.681236	13.0696	2.88422	29.1174	0.00968382	0.178725	0.713517	531.891
Yak_Ileum-3 RPKM	1890.67	143.852	14.1451	3.33645	54.6393	0	62.1874	1.01572	166.086	0	0	0	84.5391
Yak_Ileum-4 RPKM	572.285	154.828	40.575	3.79174	28.7286	2.52539	14.8209	36.2836	35.3888	1.39663	0.240609	0	279.819
Yak_Ileum-5 RPKM	389.341	304.214	2.44387	8.33735	86.4645	0.987351	32.5421	0.754695	81.2992	0	0.329577	0	113.602
Dairy_cattle_Cecum-1 RPKM	958.539	996.151	20.5857	13.8056	17.0269	6.87172	18.6497	31.8454	8.05281	0.00697467	0.0317278	0.303863	310.787
Dairy_cattle_Cecum-2 RPKM	1107.54	1138.38	57.8015	9.13315	9.40849	4.60653	3.36483	44.5477	5.08181	0.0163269	0.00456906	13.6763	204.71
Dairy_cattle_Cecum-3 RPKM	738.586	1228.08	21.7585	5.60397	12.0126	6.6378	8.30971	58.1022	5.37211	0.0200807	0.00592172	0.0126513	344.611
Dairy_cattle_Cecum-4 RPKM	1016.98	1004.55	20.0058	19.24	32.7765	4.88222	8.48396	65.7919	7.41663	0.0213094	0.00708678	1.01939	220.612
Dairy_cattle_Cecum-5 RPKM	1039.54	1052.52	27.9195	20.3174	10.3479	6.83773	5.42556	44.4752	8.59704	0.028472	0.00532572	7.51916	291.558
Dairy_cattle_Cecum-6 RPKM	1431.9	940.79	20.7451	12.7005	20.9662	6.90403	13.732	60.8143	4.05868	0.00784262	0.0566279	4.46054	295.897
Goat_Cecum-1 RPKM	940.503	1593.99	30.2135	15.3949	15.5873	15.2037	0.774439	3.44445	13.3199	0.4452	0.0168476	4.50191	325.764
Goat_Cecum-2 RPKM	724.266	1418.03	100.496	14.1501	44.5515	5.46439	1.46805	40.7814	10.0265	0.149717	0.0709377	2.21664	328.04
Goat_Cecum-3 RPKM	1056.3	1395.02	96.4323	20.9755	47.0287	0.876205	7.22157	1.89132	6.06167	0.439954	0.0525651	0.000805784	372.838
Goat_Cecum-4 RPKM	1303.63	1068.29	30.4702	6.03838	15.8942	7.63675	3.59945	6.68675	9.13822	0.274906	0.0255193	7.84748	831.564
Goat_Cecum-5 RPKM	1086.87	1403.02	46.5763	14.5909	67.4093	2.43222	1.59163	0.418982	4.3529	1.90065	0.0647362	2.8112	456.25
Goat_Cecum-6 RPKM	1045.6	1336.1	36.8244	17.4773	9.68868	12.925	7.69697	3.21023	11.9099	0.307046	0.0189282	13.0999	513.491
Roe_deer_Cecum-1 RPKM	739.481	1042.96	24.3526	1.5222	72.8557	11.4418	0.861007	51.9172	3.11432	0.0148921	0.0630365	0.000198874	293.952
Roe_deer_Cecum-2 RPKM	873.689	1595.14	45.8182	5.39646	70.4406	1.4358	0.0260291	32.0441	2.09548	0.00746842	0.995247	0	194.062
Roe_deer_Cecum-3 RPKM	909.214	1297.45	110.923	0.531412	28.1351	1.7045	0.123465	22.9686	1.85441	0.00370996	0	0.00469917	343.378
Roe_deer_Cecum-4 RPKM	1163.75	1164.74	167.863	5.36885	15.2823	10.3151	0.0152347	46.765	49.7733	0.000589775	0.0774889	0	372.984
Roe_deer_Cecum-5 RPKM	936.251	980.871	78.8336	0.708826	16.2074	3.61315	0.0189918	32.4353	2.69923	0.00585013	0.0999876	0	159.023
Sheep_Cecum-1 RPKM	1014.36	1190.09	230.546	86.2035	45.8853	6.42655	3.15828	18.341	5.34746	0.00461993	0.165641	2.21371	386.973
Sheep_Cecum-2 RPKM	770.165	1483.23	59.2587	4.03979	29.043	18.7981	24.07	10.3577	1.35599	0.0125997	0.251961	4.36821	421.152
Sheep_Cecum-3 RPKM	987.878	1406.77	23.2684	0.83638	38.1515	29.5995	17.1883	39.6403	2.90918	0.00948842	0.562263	13.743	403.067
Sheep_Cecum-4 RPKM	842.583	1384.77	63.7969	8.82739	49.4669	26.8155	68.8981	13.6099	10.4387	0.0124354	0.224526	3.43842	417.973
Sheep_Cecum-5 RPKM	943.91	1141.87	54.3064	60.4626	84.411	25.6786	77.1112	27.4824	7.1073	0.00355411	0.294316	6.31137	506.006
Water_buffalos_Cecum-1 RPKM	709.482	1505	86.3208	31.3734	54.8584	16.6856	3.47257	1.87825	12.8756	0.0271277	0.0579762	3.00231	219.034
Water_buffalos_Cecum-2 RPKM	1138.43	888.619	137.766	1.58043	9.33338	13.2981	13.0128	3.77994	8.58457	0.00857431	0.343021	12.9463	305.88
Water_buffalos_Cecum-3 RPKM	1726.09	587.793	49.0195	3.74037	38.6594	23.7318	34.649	35.7119	11.0869	0.552711	4.74477	1.03529	162.082
Water_buffalos_Cecum-4 RPKM	1068.4	1200.52	19.0546	4.56941	0.218338	2.63216	60.1248	0.147466	5.42553	0.0139241	0.00739254	0.263561	677.498
Water_buffalos_Cecum-5 RPKM	1009.01	688.187	12.8316	3.50153	32.3929	2.20882	10.551	2.52971	8.89571	0.0848288	0.568914	0	988.895
Water_deer_Cecum-1 RPKM	900.418	1364.39	112.366	0.281458	25.7912	18.4313	2.25279	178.126	9.79126	0.00160744	0.00953399	3.47713	202.431
Water_deer_Cecum-2 RPKM	953.084	1382.29	161.494	0.283195	18.5687	20.2644	0.934768	428.963	3.23152	0.00320153	0.0205039	2.78894	276.928
Water_deer_Cecum-3 RPKM	1497.89	1146.99	47.1581	0.397955	5.08775	30.2531	0.419266	183.974	1.83246	0.00218592	0.0727429	2.91269	203.075
Water_deer_Cecum-4 RPKM	845.603	1199.8	133.791	0.5071	28.851	22.47	0.421013	15.7199	11.5562	0.000481844	0.0912437	10.267	273.534
Water_deer_Cecum-5 RPKM	822.851	1291.27	39.4056	0.577683	11.1795	17.1757	0.245957	264.838	4.82714	0.00146437	0.0467124	7.96451	219.092
Yak_Cecum-1 RPKM	929.783	728.133	28.5461	32.3566	23.4598	2.36719	34.4302	3.80737	51.7523	0.0158848	0.732368	0.00209502	210.091
Yak_Cecum-2 RPKM	1437.08	600.626	22.3917	5.53073	90.5992	1.7662	32.0408	4.38821	11.217	0.0104963	0.694312	6.86361	385.553
Yak_Cecum-3 RPKM	1612.66	537.027	41.0889	1.30465	28.3156	1.93561	31.0848	8.7904	54.8914	0.0078029	1.85249	0	183.255
Yak_Cecum-4 RPKM	965.203	511.766	97.0742	0.782506	75.6428	1.12127	11.8459	11.6856	6.79043	0.0576284	0.935462	1.62996	469.87
Yak_Cecum-5 RPKM	1488.37	618.379	20.1161	0.736745	30.4255	1.24313	29.1682	5.40922	76.5409	0.0188219	2.37488	0.306916	237.633
Dairy_cattle_Colon-1 RPKM	889.795	981.854	27.1968	14.4325	13.8422	5.0682	7.08806	38.2534	10.5097	0.00948872	0.0154609	0.627212	255.73
Dairy_cattle_Colon-2 RPKM	1056.9	1099.7	59.9707	9.40135	10.2996	6.04818	3.11981	53.205	7.88045	0.00971301	0.0386984	1.10434	193.902
Dairy_cattle_Colon-3 RPKM	721.735	1094.17	34.3952	6.04927	9.03667	3.11504	1.70771	61.5871	7.64425	0.0175293	0.00170951	0.0104544	245.949
Dairy_cattle_Colon-4 RPKM	1060.99	1049.69	27.0116	12.5274	36.6015	3.24101	2.77907	58.8871	6.00375	0.0230649	0.00439795	0.467089	222.33
Dairy_cattle_Colon-5 RPKM	895.009	825.001	33.4762	20.4208	8.64526	5.75491	1.28637	58.6775	7.86937	0.00735155	0.00140467	5.06993	248.572
Dairy_cattle_Colon-6 RPKM	1364.07	976.925	22.462	11.0738	18.488	5.64449	7.03545	67.4209	4.03951	0.0171376	0.0392999	3.6963	282.89
Goat_Colon-1 RPKM	855.383	1721.38	18.4083	11.8536	25.2034	10.1753	1.48441	2.22661	8.35649	0.583778	0.0726243	18.5218	320.037
Goat_Colon-2 RPKM	732.047	1395.86	119.731	14.9219	28.9693	3.51681	0.580682	32.2674	11.6605	0.153998	0.0752451	1.86038	301.31
Goat_Colon-3 RPKM	1026.51	1359.67	124.868	20.2183	64.2619	1.02196	5.02704	0.559275	7.5582	0.609294	0.0341856	0.00240206	335.361
Goat_Colon-4 RPKM	1093.65	1244.95	56.1958	12.9771	22.0534	12.0651	2.52114	3.48769	52.2398	0.356867	0.00643433	6.2086	519.17
Goat_Colon-5 RPKM	1058.26	1415.39	38.4239	13.3486	83.293	2.34752	1.78552	0.271205	3.93527	1.99997	0.080829	7.57108	477.021
Goat_Colon-6 RPKM	1141.56	1234.86	25.9977	13.5712	6.5759	10.9318	6.53436	1.47148	9.42911	0.345822	0.0337966	11.1376	545.871
Roe_deer_Colon-1 RPKM	1029.58	1215.61	26.4589	1.50434	85.2501	13.5698	0.56063	42.3481	3.6533	0.00463387	0.01105	0.000670729	310.772
Roe_deer_Colon-2 RPKM	1127.06	1354	50.1972	4.18085	65.2498	2.25274	0.0454562	24.8343	1.667	0.0105348	0.550472	0	215.378
Roe_deer_Colon-3 RPKM	976.633	1204.85	169.049	0.697052	16.3138	2.14178	0.114335	16.33	3.90169	0.00303183	0	0.00147998	608.302
Roe_deer_Colon-4 RPKM	1310.22	1092.1	284.344	2.52864	10.741	8.13354	0.0201255	20.6426	65.8229	0	0.0137824	0.00103948	392.946
Roe_deer_Colon-5 RPKM	1028.94	946.648	117.319	0.690378	13.7097	3.92178	0.0102009	10.1488	2.48577	0.0065574	0.0358985	0	166.661
Sheep_Colon-1 RPKM	1293.35	1142.41	171.379	37.7748	36.0252	8.94978	6.31793	64.3764	3.21327	0.00348131	0.350536	2.89303	366.751
Sheep_Colon-2 RPKM	917.903	1202.92	54.7946	4.39464	44.7488	14.855	66.5424	11.4223	1.77198	0.00568505	0.822262	7.53347	389.992
Sheep_Colon-3 RPKM	963.251	1433.41	23.8657	2.59831	41.8489	25.0458	20.9734	34.2548	3.02592	0.00824286	0.67076	14.3357	399.474
Sheep_Colon-4 RPKM	923.587	1151.53	64.3347	9.4066	55.3176	28.0928	88.001	20.2645	17.8409	0.0121002	0.387104	4.10578	447.446
Sheep_Colon-5 RPKM	1009.94	1091.52	62.191	55.3993	65.1768	22.0958	78.0921	12.1653	7.21926	0.00935679	0.340442	4.68395	456.121
Water_buffalos_Colon-1 RPKM	769.177	1245.97	76.9298	5.63229	50.676	39.3586	1.08312	1.26947	11.6815	0.0326006	0.0510313	3.99039	280.559
Water_buffalos_Colon-2 RPKM	991.192	589.266	112.744	0.860074	14.9893	28.3133	12.6104	2.72515	7.49935	0.00178806	0.424384	1.56314	262.113
Water_buffalos_Colon-3 RPKM	1222.91	749.465	7.67396	0.399342	5.45766	1.51614	2.8364	11.2758	2.85379	0.0335224	0.778117	12.4319	170.486
Water_buffalos_Colon-4 RPKM	1907.81	596.386	10.123	1.05726	0.288492	0.371762	431.729	0.0657102	2.18601	0	0.0417571	1.38955	466.37
Water_buffalos_Colon-5 RPKM	870.29	660.514	14.0112	0.862513	40.0693	1.87666	2.54281	1.11542	4.26384	0.0113498	0.719756	0	1022.44
Water_deer_Colon-1 RPKM	976.353	1229.13	158.162	0.309809	26.746	10.8642	0.863076	122.228	8.34927	0.00124376	0.00425008	1.81247	192.315
Water_deer_Colon-2 RPKM	842.125	1538.73	192.358	0.467941	18.0965	29.1537	0.340564	420.669	3.31471	0.00279616	0.0183919	2.47462	232.436
Water_deer_Colon-3 RPKM	1347.45	1160.86	43.9467	0.46095	4.57271	29.4607	0.544272	273.858	2.38659	0.00126407	0.108538	2.84954	232.058
Water_deer_Colon-4 RPKM	659.466	1381.58	97.1994	0.28515	39.5217	35.6806	0.479684	17.1682	16.0482	0.000631334	0.073869	6.98534	310.206
Water_deer_Colon-5 RPKM	1021.04	1222.36	37.4054	0.384184	9.33452	11.7828	0.0749604	255.703	3.91141	0	0.0325863	12.6019	202.173
Yak_Colon-1 RPKM	185.19	582.03	8.01801	105.68	13.4831	0.164751	97.3169	0.113769	191.041	0.027377	0	0	94.8712
Yak_Colon-2 RPKM	1520.82	560.951	20.6906	5.85438	88.6925	1.2823	27.0516	6.22059	13.241	0	0.628135	5.87232	352.003
Yak_Colon-3 RPKM	1378.4	500.356	59.5704	0.631787	29.3791	1.76017	28.2696	7.44242	51.5814	0.00205234	1.52277	0	165.373
Yak_Colon-4 RPKM	1113.77	734.545	46.3655	0.737978	60.2979	1.51321	27.8563	7.28754	6.4435	0.0177517	1.73406	2.57476	541.152
Yak_Colon-5 RPKM	1571.42	650.641	14.8611	0.695475	31.448	1.31014	31.7002	4.7111	53.7246	0.00229845	2.48183	0.333858	251.914
Dairy_cattle_Rectum-1 RPKM	1160.02	1120.64	23.167	8.87341	7.99083	3.13967	5.88488	32.5044	8.27645	0.00581139	0.00644519	0.624893	280.909
Dairy_cattle_Rectum-2 RPKM	1102.9	1131.9	38.8812	5.10535	188.851	7.61071	10.0432	44.7173	4.92574	0.0326095	0.0499819	0.820668	251.798
Dairy_cattle_Rectum-3 RPKM	656.046	1096.2	36.7341	7.34615	12.5239	5.00516	1.74842	68.4422	8.84745	0.0237904	0.0203063	0.0236807	264.546
Dairy_cattle_Rectum-4 RPKM	1084.01	970.295	23.2975	12.9947	57.9405	3.6012	3.03571	76.9802	6.32141	0.0158329	0.00365077	0.0551323	208.446
Dairy_cattle_Rectum-5 RPKM	1031.66	825.155	20.6825	11.8295	9.29203	5.67938	6.56489	34.0486	5.98353	0.0118454	0.0590709	0.223712	320.312
Dairy_cattle_Rectum-6 RPKM	1464.3	964.285	23.5327	7.83394	14.7332	3.67221	3.69097	49.6924	4.93631	0.0105829	0.0240957	0.387422	255.665
Goat_Rectum-1 RPKM	535.238	2015.95	33.1734	20.0054	13.6775	21.5356	0.88901	2.18703	20.7791	0.837697	0.0189871	1.73911	328.511
Goat_Rectum-2 RPKM	887.816	1316.47	63.6036	13.8944	16.0289	10.5639	1.17543	28.9305	5.21263	0.267178	0.0696662	1.22417	462.033
Goat_Rectum-3 RPKM	864.893	1542.34	123.357	25.528	52.032	1.37293	3.52929	0.767623	7.81708	0.920799	0.0132343	0	360.865
Goat_Rectum-4 RPKM	860.048	1288.55	81.7772	16.7797	54.7089	11.8895	0.94459	22.0089	40.7624	0.340055	0.00773575	3.14052	558.302
Goat_Rectum-5 RPKM	570.513	1475.49	84.6335	31.2565	85.2207	3.48605	2.24455	0.57207	6.27329	0.731462	0.0661787	8.04114	731.55
Goat_Rectum-6 RPKM	806.337	1429.58	48.9658	29.984	37.6274	7.56702	1.78347	2.44173	11.2634	0.447638	0.0099679	3.35281	492.706
Roe_deer_Rectum-1 RPKM	960.762	1208.64	35.2627	1.23543	84.587	12.8183	0.603885	56.9593	6.62729	0.00376935	0.0235964	0.00389871	355.834
Roe_deer_Rectum-2 RPKM	1241.67	1199.79	54.2183	5.21597	43.8927	1.3531	0.0329253	21.1074	2.06314	0.00757223	0.396515	0	316.906
Roe_deer_Rectum-3 RPKM	755.933	1362.71	162.907	0.85206	13.9777	2.76609	0.144337	17.9939	4.76638	0.00458894	0	0.0044139	415.986
Roe_deer_Rectum-4 RPKM	983.041	1223.86	391.538	3.69241	20.0586	8.0381	0.0262885	12.9201	20.9512	0.00187049	0.0118055	0	372.665
Roe_deer_Rectum-5 RPKM	1012.94	1140.18	120.892	0.83961	9.15424	9.79836	0.0199711	12.5045	5.1201	0.00587369	0.0342005	0	187.135
Sheep_Rectum-1 RPKM	1081.57	1283.46	186.4	42.7418	34.3116	6.94769	4.48652	7.67168	5.202	0.0063883	0.350412	2.43782	333.72
Sheep_Rectum-2 RPKM	944.864	1339.95	31.4155	3.36027	28.01	21.6429	26.758	4.97112	2.4772	0.00511588	0.340588	3.01412	503.865
Sheep_Rectum-3 RPKM	1029.73	1457.53	21.9721	1.95028	29.0387	38.1854	17.2406	43.088	3.08526	0.0140695	0.425242	8.77006	404.522
Sheep_Rectum-4 RPKM	962.586	1262.96	41.5508	4.85679	48.4646	38.0605	91.8624	10.1312	11.3106	0.0105912	0.319893	2.84561	369.387
Sheep_Rectum-5 RPKM	951.228	1149.2	82.8284	55.9846	59.8561	20.1178	62.4609	10.7129	9.49666	0.00912057	0.143604	1.8982	477.505
Water_buffalos_Rectum-1 RPKM	828.838	1422.94	72.1349	25.2444	46.8348	18.6246	1.88512	1.59513	14.1923	0.0387476	0.0407529	2.75289	232.008
Water_buffalos_Rectum-2 RPKM	1233.32	665.841	82.8847	1.32299	13.4304	28.1568	12.3579	10.1094	7.74618	0.0135801	0.500067	4.0336	280.989
Water_buffalos_Rectum-3 RPKM	1157.07	803.524	11.1137	0.711153	6.63178	2.28971	3.63123	11.362	3.34516	0.0357744	0.777382	12.38	196.749
Water_buffalos_Rectum-4 RPKM	1967.13	529.348	9.50952	0.155536	0.344862	0.453931	725.974	0.132755	1.73874	0.00164311	0.061248	1.47329	366.759
Water_buffalos_Rectum-5 RPKM	882.786	629.165	13.5208	0.416599	41.2301	1.56021	1.7207	1.27505	2.51218	0.00374174	0.836216	0	1151.22
Water_deer_Rectum-1 RPKM	633.944	1224.18	223.687	0.132605	23.8767	25.5426	1.43901	282.515	4.45336	0.000547261	0.00750479	1.72873	319.275
Water_deer_Rectum-2 RPKM	906.72	1508.39	147.841	0.511795	20.7482	30.2179	0.635239	451.867	3.51115	0.00605892	0.027361	4.75936	228.927
Water_deer_Rectum-3 RPKM	1674.71	1020.97	47.1039	0.171299	5.58314	18.6676	0.691839	195.54	1.16512	0.0031467	0.0658867	1.38896	235.776
Water_deer_Rectum-4 RPKM	720.501	1268.08	131.731	0.165796	31.1869	25.5182	1.4393	11.8118	9.43449	0.000950499	0.0914431	5.4765	382.499
Water_deer_Rectum-5 RPKM	1102.2	1219.54	53.1472	0.187627	9.92434	8.996	0.411453	295.701	3.18075	0.000988782	0.014588	10.8417	306.56
Yak_Rectum-1 RPKM	831.389	660.829	20.7361	46.1228	22.6838	0.796192	39.6795	4.25884	69.118	0.00485013	0.46385	0	160.342
Yak_Rectum-2 RPKM	1527.16	413.743	21.3524	6.80158	111.774	0.892187	13.4995	45.9476	13.3219	0.00438268	0.441377	4.06093	198.437
Yak_Rectum-3 RPKM	1553.19	408.796	31.5871	0.790246	28.1509	0.96475	29.5507	7.85307	59.9199	0.0158112	1.75573	0	145.882
Yak_Rectum-4 RPKM	912.454	481.687	79.2191	0.729404	68.8748	0.89806	12.7479	10.1256	7.07211	0.00234764	0.838734	2.62031	442.281
Yak_Rectum-5 RPKM	1591.94	506.316	31.8815	1.27272	35.4107	0.859131	32.5787	4.1672	133.24	0.0212953	1.09578	0.132749	190.015

## Sheet: Table S18
Table S18. RPKM of vOTUs and host MAGs classified by GIT regions
Virus	Host Class
Region	Bacteroidia	Clostridia	Bacilli	Saccharimonadia	Alphaproteobacteria	Negativicutes	Kiritimatiellae	Spirochaetia	Methanobacteria	Synergistia	Thermoplasmata	Methanomicrobia	Others
Rumen	1943.01	427.874	79.4952	18.0665	47.2077	68.1295	26.7359	21.716	11.0112	32.578	2.8264	0.0287863	161.529
Reticulum	1947.71	391.592	76.2939	16.561	49.3973	86.6071	24.4374	20.9317	12.8264	27.5572	2.29405	0.0126339	158.561
Omasum	1996	515.178	74.3969	22.9587	38.4385	55.7745	20.7738	26.4296	11.0783	9.26017	4.07353	0.0103043	181.969
Abomasum	1850.33	430.783	51.9094	10.7211	42.8675	27.9204	28.1149	16.2176	9.65188	16.3074	3.65563	0.0176189	153.653
Duodenum	872.781	545.506	97.1042	58.2808	67.636	50.1183	50.3721	15.8906	41.142	14.3477	1.1671	0.117653	226.256
Jejunum	760.013	477.248	136.329	208.277	75.4968	19.4857	43.6711	15.6132	59.7778	2.49105	0.0957197	0.185727	303.845
Ileum	969.353	531.284	124.45	188.317	73.3974	11.0582	40.5194	14.7239	64.7722	1.63387	0.208121	1.15775	280.635
Cecum	1046.92	1121.99	64.2492	11.6446	33.1341	10.6133	14.4984	48.8465	12.4157	0.121633	0.422908	3.81107	351.609
Colon	1050.1	1071.28	67.8954	10.9268	32.2893	10.6054	26.1331	47.7555	16.9258	0.11709	0.329888	3.91114	337.255
Rectum	1039.77	1096.45	73.1957	10.7269	37.5314	11.0619	30.3625	51.2328	14.4986	0.104544	0.254408	2.43936	353.808
Host	Class													Pearson Correlation
Region	Bacteroidia	Clostridia	Bacilli	Saccharimonadia	Alphaproteobacteria	Negativicutes	Kiritimatiellae	Spirochaetia	Methanobacteria	Synergistia	Thermoplasmata	Methanomicrobia	Others	Region	R²	p-value
Rumen	226.667	71.3349	15.8828	4.52351	5.52508	10.6003	5.6966	5.12321	2.40059	4.84779	0.703568	0.0879765	27.0009	Rumen	0.99	<0.001
Reticulum	231.949	66.013	16.0595	4.2558	5.31883	13.0657	5.30125	4.61485	2.42505	3.6796	0.59186	0.0555772	26.888	Reticulum	0.99	<0.001
Omasum	230.353	79.9701	10.5256	5.11282	4.4059	7.34236	4.17242	5.0505	1.98698	0.992303	0.954827	0.0299858	26.4772	Omasum	0.99	<0.001
Abomasum	219.143	75.9985	15.9458	7.2345	6.24312	7.37486	6.53533	4.15094	2.32616	2.06625	0.823716	0.135542	34.4849	Abomasum	0.98	<0.001
Duodenum	85.7811	125.724	27.2968	44.8933	13.5562	23.5047	16.106	1.07032	14.7447	1.75421	0.119252	0.00178927	33.0613	Duodenum	0.72	<0.001
Jejunum	87.3431	193.648	27.8911	80.2985	4.94239	6.84616	3.0188	3.38648	8.43012	2.48189	0.769618	0.0691125	40.9513	Jejunum	0.59	<0.001
Ileum	32.4031	208.803	54.647	99.0346	6.06636	1.92068	18.5923	0.72577	20.4665	0.336188	0.0128042	0	27.9889	Ileum	0.22	0.1
Cecum	175.92	237.411	13.2568	3.6186	5.63181	6.52079	2.78824	7.86317	2.54076	0.0150322	0.406381	3.35938	25.5576	Cecum	0.96	<0.001
Colon	179.05	228.492	12.5546	2.8034	5.25127	5.80619	5.24757	8.15424	6.36079	0	0.453066	3.56693	24.6979	Colon	0.96	<0.001
Rectum	177.084	225.523	13.3302	3.4013	6.34565	6.7541	6.69166	9.57296	2.98617	0.00122972	0.392547	2.47515	27.5213	Rectum	0.97	<0.001
