# Supplementary material for: Spatial heterogeneity of viral communities across the gastrointestinal tracts of ruminants
Source: Research Square preprint supplement (doi:10.21203/rs.3.rs-4244627/v1), 2024-04-10
Supplement: Supplementary file 5 [file 307da0a4b05154043ac0b527.xlsx]

## Sheet: Table S5
Table S5. List of RGVC overlaps with other databases
vOTU	Contig	Ref_Name	Database	Idendity	Coverage
RGVC41	2022NBT-10258_1	IMGVR_UViG_2562617113_000019|2562617113|2562626407|59587-102713	IMG/VR v4	99.64	0.822764
RGVC50	2022NBT-103107	SRR4435563_25201||full	RVD	98.304	0.836797
RGVC109	2022NBT-106648	ERR3220200_873472||full	RVD	93.112	0.792775
RGVC244	2022NBT-115912	IMGVR_UViG_3300032167_000961|3300032167|Ga0224413_10039122	IMG/VR v4	92.35	0.895358
RGVC376	2022NBT-126266	virsorter_curated_3036	PIGEON	97.786	1
RGVC376	2022NBT-126266	IMGVR_UViG_2526164688_000028|2526164688|2526183876|11130-23876	IMG/VR v4	97.95	0.988834
RGVC378	2022NBT-126358	IMGVR_UViG_2675903575_000010|2675903575|2675990601|52758-63421	IMG/VR v4	99.78	0.933333
RGVC549	2022NBT-141522	SRR11585064_47968||full	RVD	96.895	0.761796
RGVC558	2022NBT-14262_1	virsorter_curated_2379	PIGEON	99.619	0.857333
RGVC558	2022NBT-14262_1	IMGVR_UViG_2563366957_000014|2563366957|2563399057|84280-127397	IMG/VR v4	99.62	0.857333
RGVC723	2022NBT-15767_1	virsorter_curated_3277	PIGEON	98.814	0.931562
RGVC723	2022NBT-15767_1	IMGVR_UViG_2541047836_000008|2541047836|2541174562|173643-207765	IMG/VR v4	98.82	0.949287
RGVC1199	2022NBT-21174_1	IMGVR_UViG_2562617161_000004|2562617161|2562631010|45578-84052	IMG/VR v4	93.51	0.805092
RGVC1199	2022NBT-21174_1	uvig_292988	GPD	93.878	0.953335
RGVC1255	2022NBT-21928_1	IMGVR_UViG_3300022661_000263|3300022661|Ga0216339_10005667	IMG/VR v4	97.54	0.777094
RGVC1386	2022NBT-23567_1	IMGVR_UViG_3300033757_000513|3300033757|Ga0373404_0000450|10396-61121	IMG/VR v4	91.96	0.825447
RGVC2355	2022NBT-39037_1	IMGVR_UViG_3300008096_000460|3300008096|Ga0114155_1000182|47300-82347	IMG/VR v4	99.99	0.789956
RGVC2694	2022NBT-44439_1	IMGVR_UViG_2778261214_000028|2778261214|2778290896|2-35269	IMG/VR v4	99.91	0.773505
RGVC2878	2022NBT-47898_1	IMGVR_UViG_2562617195_000005|2562617195|2562632641|11817-55280	IMG/VR v4	97.76	0.789713
RGVC3478	2022NBT-58328_1	IMGVR_UViG_2521172717_000004|2521172717|2521194526|1746516-1795565	IMG/VR v4	99.11	1
RGVC4414	2022NBT-7307_1	virsorter_curated_741	PIGEON	99.466	0.813985
RGVC4414	2022NBT-7307_1	IMGVR_UViG_2526164601_000040|2526164601|2526180199|3-33762	IMG/VR v4	99.46	0.883827
RGVC4542	2022NBT-75847	IMGVR_UViG_3300029539_000121|3300029539|Ga0244892_100358	IMG/VR v4	94.91	1
RGVC4550	2022NBT-7594_1	IMGVR_UViG_2756170241_000002|2756170241|2756196050|691-45027	IMG/VR v4	95.12	0.759113
RGVC4574	2022NBT-76253	IMGVR_UViG_2713896785_000028|2713896785|2713907765|99135-144720	IMG/VR v4	98.82	0.910197
RGVC4703	2022NBT-79090	IMGVR_UViG_3300023371_000298|3300023371|Ga0216340_10006459	IMG/VR v4	98.92	0.768487
RGVC4824	2022NBT-826_1	ERR3224582_111340||full_1	RVD	97.022	0.931865
RGVC4911	2022NBT-85820	IMGVR_UViG_641228489_000005|641228489|641228512|2855023-2905159	IMG/VR v4	99.99	1
RGVC5125	2022NBT-93755	IMGVR_UViG_3300029735_000126|3300029735|Ga0245259_100950	IMG/VR v4	96.1	0.755152
RGVC5264	contig_100454	ERR3275102_200051||full_1	RVD	94.192	0.793315
RGVC5973	contig_161105	IMGVR_UViG_3300021256_000189|3300021256|Ga0223826_10001524	IMG/VR v4	93.24	0.775396
RGVC6773	contig_53002	SRR12021154_1410335||full	RVD	95.308	0.820394
RGVC7125	contig_78540	ERR3224601_273150||full_1	RVD	91.785	0.849932
RGVC7395	Dairy_cattle_Abomasum-2__c201747	ERR3220179_20180||full	RVD	99.113	0.883817
RGVC7405	Dairy_cattle_Abomasum-5__c81816	ERR2027916_1077907||full	RVD	93.997	0.800419
RGVC7485	Dairy_cattle_Cecum-3__c283	SRR12529077_3947816||full	RVD	99.802	0.8409
RGVC7539	Dairy_cattle_Cecum-4__c608046	SRR12529076_1011768||full	RVD	99.889	0.984146
RGVC7554	Dairy_cattle_Cecum-4__c682923	SRR12529076_1440292||full	RVD	99.951	0.828845
RGVC7612	Dairy_cattle_Cecum-6__c413	SRR12529074_1218410||full	RVD	99.92	0.993993
RGVC7642	Dairy_cattle_Colon-1__c319312	SRR12529079_440890||full	RVD	99.816	0.803987
RGVC7647	Dairy_cattle_Colon-1__c38	SRR12529079_1369194||full	RVD	99.902	0.954809
RGVC7657	Dairy_cattle_Colon-2__c1101230	SRR12529100_255537||full	RVD	90.591	0.814875
RGVC7686	Dairy_cattle_Colon-2__c790793	SRR12529265_2677925||full	RVD	99.982	0.764067
RGVC7810	Dairy_cattle_Colon-5__c114473	SRR12529075_4109287||full	RVD	99.694	1
RGVC7820	Dairy_cattle_Colon-5__c183	SRR12529075_3576101||full	RVD	100	0.988522
RGVC7864	Dairy_cattle_Colon-5__c603761	SRR12529075_2817866||full	RVD	99.99	0.851953
RGVC7901	Dairy_cattle_Colon-5__c935433	SRR12529075_3479088||full	RVD	99.942	0.852677
RGVC7914	Dairy_cattle_Duodenum-1__c101344	SRR10912533_2412596||full	RVD	95.426	0.978744
RGVC7936	Dairy_cattle_Duodenum-1__c1255	SRR12529079_4390860||full	RVD	99.997	0.968295
RGVC7991	Dairy_cattle_Duodenum-1__c169146	ERR3220179_880503||full	RVD	90.152	0.817585
RGVC8016	Dairy_cattle_Duodenum-1__c19656	ERR3275115_471666||full	RVD	90.726	0.886272
RGVC8035	Dairy_cattle_Duodenum-1__c218014	ERR3275133_1835476||full	RVD	94.06	0.779491
RGVC8053	Dairy_cattle_Duodenum-1__c243815	SRR8387720_452900||full	RVD	95.169	0.940675
RGVC8068	Dairy_cattle_Duodenum-1__c284162_1	IMGVR_UViG_3300013767_000188|3300013767|Ga0180393_1000024|118808-190479	IMG/VR v4	100	0.98978
RGVC8147	Dairy_cattle_Duodenum-1__c427	SRR12529079_2268040||full	RVD	99.919	0.779802
RGVC8155	Dairy_cattle_Duodenum-1__c440660	SRR12529101_2994201||full	RVD	93.495	0.941827
RGVC8211	Dairy_cattle_Duodenum-1__c535	FL88599_47759||full	RVD	92.683	0.929088
RGVC8228	Dairy_cattle_Duodenum-1__c561468	ERR3224607_1132687||full	RVD	93.494	0.774435
RGVC8232	Dairy_cattle_Duodenum-1__c565	SRR12021150_45642||full	RVD	96.251	0.896272
RGVC8232	Dairy_cattle_Duodenum-1__c565	IMGVR_UViG_3300045988_096308|3300045988|Ga0495776_105586	IMG/VR v4	97	0.840917
RGVC8244	Dairy_cattle_Duodenum-1__c59	SRR12529079_4017227||full	RVD	99.996	0.836508
RGVC8256	Dairy_cattle_Duodenum-1__c627659	ERR3275091_916818||full	RVD	98.046	0.754291
RGVC8324	Dairy_cattle_Duodenum-2__c246224	IMGVR_UViG_3300029412_000015|3300029412|Ga0243915_100989	IMG/VR v4	99.58	0.969089
RGVC8327	Dairy_cattle_Duodenum-2__c276418	SRR12529078_3829453||full	RVD	99.839	0.951408
RGVC8333	Dairy_cattle_Duodenum-2__c345613	SRR12529078_318738||full	RVD	99.99	0.916041
RGVC8352	Dairy_cattle_Duodenum-2__c550984	ERR3275101_208069||full	RVD	95.212	0.999755
RGVC8381	Dairy_cattle_Duodenum-3__c103405	ERR3275098_635496||full	RVD	90.229	0.891163
RGVC8469	Dairy_cattle_Duodenum-3__c1313	SRR12529077_4172572||full	RVD	99.97	0.892432
RGVC8487	Dairy_cattle_Duodenum-3__c1377	SRR12529077_1361095||full	RVD	99.581	0.849549
RGVC8494	Dairy_cattle_Duodenum-3__c1407	SRR12529077_3925302||full	RVD	99.957	0.799114
RGVC8539	Dairy_cattle_Duodenum-3__c16202	ERR3201384_537455||full	RVD	90.504	0.815968
RGVC8571	Dairy_cattle_Duodenum-3__c174643	SRR873603_695524||full	RVD	91.453	0.853072
RGVC8576	Dairy_cattle_Duodenum-3__c1791	SRR12529077_3531866||full	RVD	99.759	0.85062
RGVC8624	Dairy_cattle_Duodenum-3__c206798	ERR3275115_982593||full	RVD	94.135	0.799946
RGVC8690	Dairy_cattle_Duodenum-3__c248	SRR12529078_505248||full	RVD	97.965	0.986267
RGVC8719	Dairy_cattle_Duodenum-3__c26139	ERR3224614_1432769||full	RVD	90.4	0.770562
RGVC8731	Dairy_cattle_Duodenum-3__c2655	SRR12529077_4519696||full	RVD	99.875	0.80655
RGVC8769	Dairy_cattle_Duodenum-3__c284684	ERR3275096_92022||full	RVD	93.49	0.765639
RGVC8850	Dairy_cattle_Duodenum-3__c331510	ERR4297091_1299163||full	RVD	94.718	0.883155
RGVC8887	Dairy_cattle_Duodenum-3__c350218	SRR12529077_4173620||full	RVD	99.994	0.924637
RGVC8893	Dairy_cattle_Duodenum-3__c354893	ERR3224594_1081425||full	RVD	93.621	0.873373
RGVC8929	Dairy_cattle_Duodenum-3__c381611	SRR12529077_943159||full	RVD	99.997	0.999285
RGVC8932	Dairy_cattle_Duodenum-3__c386998	ERR3220189_133597||full	RVD	90.145	0.857929
RGVC8938	Dairy_cattle_Duodenum-3__c392759	SRR12021143_1539840||full	RVD	95.155	0.863076
RGVC8995	Dairy_cattle_Duodenum-3__c44769	ERR3275133_1835476||full	RVD	93.323	0.808563
RGVC9002	Dairy_cattle_Duodenum-3__c451082	ERR3275095_1551384||full	RVD	91.176	0.919817
RGVC9007	Dairy_cattle_Duodenum-3__c458	SRR12529077_3011297||full	RVD	99.991	0.851423
RGVC9076	Dairy_cattle_Duodenum-3__c521122	ERR3275138_5840||full	RVD	91.329	0.937563
RGVC9132	Dairy_cattle_Duodenum-3__c574933	ERR3201403_586048||full	RVD	91.359	0.786646
RGVC9167	Dairy_cattle_Duodenum-3__c601345	SRR12529076_1189967||full	RVD	90.178	0.778348
RGVC9172	Dairy_cattle_Duodenum-3__c60451	SRR873605_1706963||full	RVD	90.712	0.850542
RGVC9265	Dairy_cattle_Duodenum-3__c703016	ERR3275106_1365232||full	RVD	91.799	0.797365
RGVC9303	Dairy_cattle_Duodenum-3__c747983	SRR873604_418652||full	RVD	91.338	0.755044
RGVC9306	Dairy_cattle_Duodenum-3__c75180	ERR3220182_809284||full	RVD	91.436	0.988323
RGVC9321	Dairy_cattle_Duodenum-3__c768981	ERR3201405_926105||full	RVD	91.816	0.843551
RGVC9337	Dairy_cattle_Duodenum-3__c781185	SRR10912533_1776793||full	RVD	96.073	0.867891
RGVC9388	Dairy_cattle_Duodenum-3__c830669	ERR3220221_1017057||full	RVD	90.974	0.947966
RGVC9410	Dairy_cattle_Duodenum-3__c842132	SRR12529077_178950||full	RVD	99.945	0.914777
RGVC9418	Dairy_cattle_Duodenum-3__c87209	SRR12021154_457927||full	RVD	97.592	0.972578
RGVC9422	Dairy_cattle_Duodenum-3__c89175	SRR12529077_1014165||full	RVD	99.927	0.963308
RGVC9428	Dairy_cattle_Duodenum-3__c91103	IMGVR_UViG_3300028048_000972|3300028048|Ga0256405_10008784	IMG/VR v4	93.37	0.91013
RGVC9458	Dairy_cattle_Duodenum-4__c53971	ERR3220225_507388||full	RVD	93.516	0.831876
RGVC9460	Dairy_cattle_Duodenum-4__c569301	ERR3201393_135738||full	RVD	92.49	0.96605
RGVC9471	Dairy_cattle_Duodenum-5__c220887_1	IMGVR_UViG_3300026233_000025|3300026233|Ga0209762_100048|46453-88643	IMG/VR v4	100	0.984552
RGVC9491	Dairy_cattle_Duodenum-5__c594275	SRR12529075_118291||full	RVD	99.643	0.871521
RGVC9494	Dairy_cattle_Duodenum-5__c82927	SRR12529075_1682131||full	RVD	99.855	0.873722
RGVC9513	Dairy_cattle_Duodenum-6__c151926	ERR3275094_1355526||full	RVD	91.047	0.763267
RGVC9529	Dairy_cattle_Duodenum-6__c171874	SRR12529074_3965937||full	RVD	99.98	0.750778
RGVC9544	Dairy_cattle_Duodenum-6__c41177	SRR10765506_623997||full	RVD	92.048	0.89263
RGVC9554	Dairy_cattle_Duodenum-6__c78	SRR12529074_499013||full	RVD	99.813	0.829658
RGVC9600	Dairy_cattle_Jejunum-1__c140220	SRR12529079_2557077||full	RVD	99.965	0.824311
RGVC9623	Dairy_cattle_Jejunum-1__c165	SRR12529079_716773||full	RVD	99.971	0.821179
RGVC9645	Dairy_cattle_Jejunum-1__c187	IMGVR_UViG_3300028048_000226|3300028048|Ga0256405_10002451	IMG/VR v4	95.38	0.805311
RGVC9681	Dairy_cattle_Jejunum-1__c219323	ERR3224602_1779832||full	RVD	92.077	0.81039
RGVC9700	Dairy_cattle_Jejunum-1__c233387	SRR12529102_395934||full	RVD	90.892	0.821405
RGVC9712	Dairy_cattle_Jejunum-1__c244	ERR3220186_1846747||full	RVD	94.32	0.824427
RGVC9738	Dairy_cattle_Jejunum-1__c271788	ERR3224607_1132687||full	RVD	92.922	0.816736
RGVC9749	Dairy_cattle_Jejunum-1__c282059	ERR3220211_1826026||full	RVD	91.759	1
RGVC9768	Dairy_cattle_Jejunum-1__c314058	SRR8704694_373897||full	RVD	99.976	1
RGVC9772	Dairy_cattle_Jejunum-1__c319	SRR12529079_2534588||full	RVD	99.993	0.808118
RGVC9782	Dairy_cattle_Jejunum-1__c328747	ERR3220185_715316||full	RVD	92.788	0.991521
RGVC9782	Dairy_cattle_Jejunum-1__c328747	IMGVR_UViG_3300012979_000361|3300012979|Ga0123348_10002651	IMG/VR v4	91.95	0.991616
RGVC9843	Dairy_cattle_Jejunum-1__c409215	ERR3515525_313811||full	RVD	98.139	0.997492
RGVC9858	Dairy_cattle_Jejunum-1__c421354	ERR3220221_1017057||full	RVD	91.527	1
RGVC9860	Dairy_cattle_Jejunum-1__c426187	IMGVR_UViG_3300028048_001608|3300028048|Ga0256405_10009103	IMG/VR v4	93.79	0.943046
RGVC9864	Dairy_cattle_Jejunum-1__c429710	ERR3224600_1694530||full	RVD	91.83	0.963254
RGVC9866	Dairy_cattle_Jejunum-1__c43147	SRR12529074_3268742||full	RVD	99.951	0.80215
RGVC9877	Dairy_cattle_Jejunum-1__c453458	ERR3211473_193978||full	RVD	98.416	0.815197
RGVC9905	Dairy_cattle_Jejunum-1__c504314	SRR7907953_372162||full	RVD	94.053	0.774931
RGVC9918	Dairy_cattle_Jejunum-1__c531672	SRR12529079_4016291||full	RVD	99.964	0.999927
RGVC9993	Dairy_cattle_Jejunum-1__c66	ERR3224576_109546||full	RVD	90.904	0.77811
RGVC9997	Dairy_cattle_Jejunum-1__c664499	SRR12529075_1910888||full	RVD	99.691	0.755992
RGVC10034	Dairy_cattle_Jejunum-1__c91987	ERR2027896_322538||full	RVD	93.173	0.780061
RGVC10047	Dairy_cattle_Jejunum-2__c1002412	SRR8387715_9344||full	RVD	90.97	0.944658
RGVC10060	Dairy_cattle_Jejunum-2__c1050165	ERR3211446_197576||full	RVD	90.797	0.878313
RGVC10066	Dairy_cattle_Jejunum-2__c1089	SRR12529078_3639086||full	RVD	99.853	0.773879
RGVC10069	Dairy_cattle_Jejunum-2__c1100947	IMGVR_UViG_3300031994_000711|3300031994|Ga0310691_10004242	IMG/VR v4	96.98	0.754622
RGVC10115	Dairy_cattle_Jejunum-2__c1259127	ERR3201397_256026||full	RVD	93.014	0.969133
RGVC10154	Dairy_cattle_Jejunum-2__c1351	SRR873608_2269713||full	RVD	91.999	0.99119
RGVC10159	Dairy_cattle_Jejunum-2__c1359	ERR3275093_1133361||full	RVD	91.244	0.877153
RGVC10164	Dairy_cattle_Jejunum-2__c1383155	SRR12529075_3734221||full	RVD	99.997	0.877342
RGVC10193	Dairy_cattle_Jejunum-2__c1522620	ERR3201396_768121||full	RVD	92.101	0.762631
RGVC10217	Dairy_cattle_Jejunum-2__c1637632	SRR9006654_2654051||full	RVD	94.946	0.885592
RGVC10269	Dairy_cattle_Jejunum-2__c1895558	ERR3224607_1086351||full	RVD	91.292	1
RGVC10287	Dairy_cattle_Jejunum-2__c1997578	ERR3275107_973862||full	RVD	94.746	0.850518
RGVC10326	Dairy_cattle_Jejunum-2__c335	SRR12021141_1835487||full	RVD	90.002	0.908066
RGVC10368	Dairy_cattle_Jejunum-2__c489639	SRR12529078_2850175||full	RVD	99.879	0.788212
RGVC10389	Dairy_cattle_Jejunum-2__c559560	SRR12529078_1711304||full	RVD	99.775	0.945657
RGVC10418	Dairy_cattle_Jejunum-2__c649	ERR3275104_635608||full	RVD	91.204	0.943422
RGVC10424	Dairy_cattle_Jejunum-2__c669	SRR12529078_4140372||full	RVD	99.993	0.771179
RGVC10444	Dairy_cattle_Jejunum-2__c713327	FH88565_108627||full	RVD	91.809	0.928355
RGVC10457	Dairy_cattle_Jejunum-2__c759803	ERR3275108_427039||full	RVD	90.446	0.909099
RGVC10457	Dairy_cattle_Jejunum-2__c759803	IMGVR_UViG_3300026549_000426|3300026549|Ga0256404_1010752	IMG/VR v4	91.42	0.908073
RGVC10496	Dairy_cattle_Jejunum-2__c825525	SRR12529075_3375873||full	RVD	99.997	0.764541
RGVC10502	Dairy_cattle_Jejunum-2__c832200	ERR3211474_426824||full	RVD	94.984	0.99594
RGVC10553	Dairy_cattle_Jejunum-2__c983106	IMGVR_UViG_3300028591_001196|3300028591|Ga0247611_10006760	IMG/VR v4	90.73	0.993178
RGVC10559	Dairy_cattle_Jejunum-4__c13567	SRR12529076_3090145||full	RVD	99.914	0.9895
RGVC10599	Dairy_cattle_Jejunum-6__c158619	ERR2027908_1160769||full	RVD	90.508	0.998372
RGVC10617	Dairy_cattle_Jejunum-6__c187438	TS.02_1335744||full	RVD	92.026	0.806186
RGVC10622	Dairy_cattle_Jejunum-6__c190460	SRR10765506_623997||full	RVD	92.24	0.987614
RGVC10640	Dairy_cattle_Jejunum-6__c213371	SRR12529074_1851589||full	RVD	99.871	0.893421
RGVC10663	Dairy_cattle_Jejunum-6__c250450	ERR3220211_1826026||full	RVD	90.041	0.943629
RGVC10684	Dairy_cattle_Jejunum-6__c283049	SRR12021144_1888683||full	RVD	98.221	0.887767
RGVC10688	Dairy_cattle_Jejunum-6__c296	SRR12529074_4048386||full	RVD	100	0.902948
RGVC10693	Dairy_cattle_Jejunum-6__c332	SRR12529074_2779705||full	RVD	99.989	0.987649
RGVC10700	Dairy_cattle_Jejunum-6__c36	SRR12529379_544851||full	RVD	99.996	0.82751
RGVC10702	Dairy_cattle_Jejunum-6__c365	SRR12529074_1264620||full	RVD	99.993	0.837689
RGVC10716	Dairy_cattle_Jejunum-6__c6086	SRR12021134_1139798||full	RVD	95.113	0.805463
RGVC10726	Dairy_cattle_Jejunum-6__c84199	IMGVR_UViG_3300028797_000484|3300028797|Ga0265301_10001541	IMG/VR v4	91.13	0.768904
RGVC10735	Dairy_cattle_Omasum-1__c902996	SRR12529079_62290||full	RVD	99.72	0.899973
RGVC10736	Dairy_cattle_Omasum-3__c1032812	ERR3201419_1028086||full	RVD	99.312	0.906812
RGVC10738	Dairy_cattle_Omasum-3__c137_1	SRR12529077_937948||full_1	RVD	100	1
RGVC10739	Dairy_cattle_Omasum-3__c234596	SRR4435572_182231||full	RVD	98.779	0.890587
RGVC10745	Dairy_cattle_Omasum-3__c926841	SRR12529077_700710||full	RVD	99.988	0.993637
RGVC10747	Dairy_cattle_Omasum-4__c637247	SRR12021132_187730||full	RVD	98.349	1
RGVC10751	Dairy_cattle_Omasum-5__c92190	ERR3275093_546615||full	RVD	96.494	0.933097
RGVC10756	Dairy_cattle_Omasum-6__c480006	SRR12529074_4091421||full	RVD	100	1
RGVC10757	Dairy_cattle_Omasum-6__c861263	SRR12529074_2773576||full	RVD	99.983	1
RGVC10772	Dairy_cattle_Rectum-1__c333142	SRR12529079_4007170||full	RVD	98.976	0.85878
RGVC10817	Dairy_cattle_Rectum-3__c212528	SRR12529077_2545823||full	RVD	99.351	0.939339
RGVC10853	Dairy_cattle_Rectum-3__c693780	ERR3220216_129234||full	RVD	97.389	0.778326
RGVC10858	Dairy_cattle_Rectum-3__c754932	SRR12021140_937260||full	RVD	90.36	0.802618
RGVC10996	Dairy_cattle_Rectum-6__c675830	ERR2027930_733716||full	RVD	91.525	0.753327
RGVC10997	Dairy_cattle_Rectum-6__c706862	SRR12529074_3976818||full	RVD	99.987	0.925749
RGVC11010	Dairy_cattle_Reticulum-1__c920531	SRR12021132_2208060||full	RVD	95.042	0.926018
RGVC11034	Dairy_cattle_Reticulum-3__c1020162	SRR12529077_1110235||full	RVD	99.937	0.840655
RGVC11039	Dairy_cattle_Reticulum-3__c275510	SRR12529077_409780||full	RVD	99.995	0.841558
RGVC11040	Dairy_cattle_Reticulum-3__c344083	SRR12529077_3000163||full	RVD	99.847	0.934977
RGVC11052	Dairy_cattle_Reticulum-4__c1312061	SRR12529076_774005||full	RVD	100	0.755145
RGVC11054	Dairy_cattle_Reticulum-4__c1482599	SRR12529076_1013707||full	RVD	99.993	0.829854
RGVC11058	Dairy_cattle_Reticulum-4__c199	SRR12529076_3978530||full	RVD	99.955	0.949883
RGVC11062	Dairy_cattle_Reticulum-4__c61226	SRR12529076_3459324||full	RVD	99.882	0.835509
RGVC11065	Dairy_cattle_Reticulum-5__c1157271	SRR12529075_2193973||full	RVD	98.984	0.873039
RGVC11067	Dairy_cattle_Reticulum-5__c1316632	SRR12529075_468563||full	RVD	100	0.999942
RGVC11080	Dairy_cattle_Reticulum-6__c1372075	ERR3224585_125417||full	RVD	91.726	0.794349
RGVC11081	Dairy_cattle_Reticulum-6__c1391482	ERR3525310_643885||full	RVD	96.757	0.970879
RGVC11089	Dairy_cattle_Reticulum-6__c194724	SRR8703845_668273||full	RVD	99.885	0.889204
RGVC11089	Dairy_cattle_Reticulum-6__c194724	IMGVR_UViG_2562617195_000005|2562617195|2562632641|11817-55280	IMG/VR v4	99.95	0.905685
RGVC11093	Dairy_cattle_Reticulum-6__c249863	SRR12529074_3810267||full	RVD	99.854	0.775589
RGVC11115	Dairy_cattle_Rumen-1__c1041489	SRR12021133_744906||full	RVD	96.284	0.946777
RGVC11116	Dairy_cattle_Rumen-1__c1303540	SRR12529079_4033662||full	RVD	99.971	0.999713
RGVC11122	Dairy_cattle_Rumen-1__c2416229	SRR12529079_459183||full	RVD	99.98	0.972057
RGVC11124	Dairy_cattle_Rumen-1__c299056	SRR12529079_2528477||full	RVD	99.731	0.866953
RGVC11125	Dairy_cattle_Rumen-1__c353683	SRR12529079_1199439||full	RVD	99.97	1
RGVC11126	Dairy_cattle_Rumen-1__c371	SRR12529079_3659712||full	RVD	99.996	0.791325
RGVC11127	Dairy_cattle_Rumen-1__c547259	SRR12529079_1237327||full	RVD	99.863	1
RGVC11128	Dairy_cattle_Rumen-1__c578251	SRR12529079_3115516||full	RVD	99.898	0.891466
RGVC11129	Dairy_cattle_Rumen-1__c694164	SRR12529074_2415694||full	RVD	99.996	0.997377
RGVC11130	Dairy_cattle_Rumen-1__c731085	SRR8397894_161864||full	RVD	99.255	0.806269
RGVC11131	Dairy_cattle_Rumen-2__c1055165	SRR12529078_2458211||full	RVD	100	0.887727
RGVC11133	Dairy_cattle_Rumen-2__c1215252	SRR12529078_2743010||full	RVD	99.995	0.982006
RGVC11135	Dairy_cattle_Rumen-2__c1625352	SRR12529078_2974145||full	RVD	99.979	1
RGVC11136	Dairy_cattle_Rumen-2__c1637679	SRR12529078_2831884||full	RVD	99.98	1
RGVC11137	Dairy_cattle_Rumen-2__c1676145	SRR12529078_113541||full	RVD	99.925	1
RGVC11138	Dairy_cattle_Rumen-2__c2058539	SRR12529078_1123289||full	RVD	99.954	1
RGVC11139	Dairy_cattle_Rumen-2__c2096905	SRR12529078_3828748||full	RVD	99.998	1
RGVC11140	Dairy_cattle_Rumen-2__c2127730	SRR12529078_3182727||full	RVD	99.989	1
RGVC11141	Dairy_cattle_Rumen-2__c2241644	SRR12529078_382327||full	RVD	99.984	1
RGVC11142	Dairy_cattle_Rumen-2__c2294403	SRR12529078_3253470||full	RVD	99.742	0.935313
RGVC11149	Dairy_cattle_Rumen-2__c930344	SRR12529078_1259794||full	RVD	99.992	0.889486
RGVC11150	Dairy_cattle_Rumen-3__c101694	SRR12529077_2436091||full	RVD	99.996	0.985941
RGVC11151	Dairy_cattle_Rumen-3__c113150	SRR12529077_2332425||full	RVD	99.988	0.886667
RGVC11153	Dairy_cattle_Rumen-3__c126381	SRR12529077_793625||full	RVD	99.991	0.934765
RGVC11156	Dairy_cattle_Rumen-3__c2002777	SRR12529077_14735||full	RVD	99.531	0.876986
RGVC11157	Dairy_cattle_Rumen-3__c2129067	SRR12529077_4048278||full	RVD	99.903	0.987336
RGVC11158	Dairy_cattle_Rumen-3__c2297511	SRR12529077_3795295||full	RVD	99.946	0.844153
RGVC11159	Dairy_cattle_Rumen-3__c2465942	ERR3201419_1028086||full	RVD	99.291	0.786532
RGVC11160	Dairy_cattle_Rumen-3__c264266	SRR12529077_4558990||full	RVD	99.822	0.999782
RGVC11161	Dairy_cattle_Rumen-3__c27020	SRR12529077_2773689||full	RVD	99.997	1
RGVC11163	Dairy_cattle_Rumen-3__c319_1	SRR12529077_660308||full_1	RVD	99.947	0.924018
RGVC11167	Dairy_cattle_Rumen-3__c469617	SRR12529077_3769990||full	RVD	99.957	1
RGVC11169	Dairy_cattle_Rumen-3__c593561	SRR12529077_4111442||full	RVD	99.948	0.920661
RGVC11173	Dairy_cattle_Rumen-3__c870588	SRR12529077_731595||full	RVD	99.917	0.977679
RGVC11175	Dairy_cattle_Rumen-4__c1215956	SRR12529076_2394277||full	RVD	99.989	1
RGVC11176	Dairy_cattle_Rumen-4__c1631413	SRR12529076_2404221||full	RVD	99.956	0.99429
RGVC11177	Dairy_cattle_Rumen-4__c164031	SRR12529076_331567||full	RVD	99.983	1
RGVC11178	Dairy_cattle_Rumen-4__c1660187	SRR12529076_1013707||full	RVD	99.984	1
RGVC11179	Dairy_cattle_Rumen-4__c1729094	SRR12529076_3498537||full	RVD	99.938	1
RGVC11181	Dairy_cattle_Rumen-4__c2061378	SRR12529076_938483||full	RVD	99.963	0.958323
RGVC11183	Dairy_cattle_Rumen-4__c2201259	SRR12529076_2582033||full	RVD	99.985	1
RGVC11184	Dairy_cattle_Rumen-4__c2270609	SRR873608_2669295||full	RVD	97.998	0.85583
RGVC11185	Dairy_cattle_Rumen-4__c340371	SRR12529076_1489460||full	RVD	99.991	1
RGVC11186	Dairy_cattle_Rumen-4__c341873	SRR12529076_2699087||full	RVD	99.992	1
RGVC11187	Dairy_cattle_Rumen-4__c383912	SRR12529076_2507053||full	RVD	99.986	1
RGVC11188	Dairy_cattle_Rumen-4__c417089	SRR12529076_2346118||full	RVD	99.98	1
RGVC11189	Dairy_cattle_Rumen-4__c500737	SRR12529076_780057||full	RVD	100	0.900475
RGVC11191	Dairy_cattle_Rumen-4__c617710_1	SRR12529076_439921||full	RVD	99.922	0.97757
RGVC11194	Dairy_cattle_Rumen-5__c1013354	SRR12529075_1449079||full	RVD	99.875	1
RGVC11199	Dairy_cattle_Rumen-5__c158615	SRR12529075_1556578||full	RVD	99.995	1
RGVC11203	Dairy_cattle_Rumen-5__c191624	SRR12529075_1429305||full	RVD	99.973	0.999735
RGVC11204	Dairy_cattle_Rumen-5__c1917447	SRR12529075_2746065||full	RVD	99.932	0.999674
RGVC11205	Dairy_cattle_Rumen-5__c1971659	SRR12529075_3114462||full	RVD	99.968	1
RGVC11207	Dairy_cattle_Rumen-5__c2064165	SRR12529075_1897940||full	RVD	99.99	1
RGVC11208	Dairy_cattle_Rumen-5__c2140672_1	SRR12529075_1867025||full_1	RVD	99.937	0.998414
RGVC11210	Dairy_cattle_Rumen-5__c222089	SRR12529075_3413568||full	RVD	99.997	0.999771
RGVC11211	Dairy_cattle_Rumen-5__c2392069	IMGVR_UViG_3300031760_008119|3300031760|Ga0326513_10001282	IMG/VR v4	99.85	0.957725
RGVC11212	Dairy_cattle_Rumen-5__c2464229	SRR12529075_643015||full	RVD	99.962	0.942731
RGVC11215	Dairy_cattle_Rumen-5__c324341	SRR12529075_2379229||full	RVD	99.944	1
RGVC11216	Dairy_cattle_Rumen-5__c325402	SRR12529075_1261699||full	RVD	99.976	0.972246
RGVC11217	Dairy_cattle_Rumen-5__c327941_1	SRR12529075_423984||full	RVD	99.797	0.953031
RGVC11221	Dairy_cattle_Rumen-5__c846807_1	SRR12529075_2061280||full_1	RVD	99.985	1
RGVC11222	Dairy_cattle_Rumen-5__c913639	SRR12529075_2670171||full	RVD	99.828	1
RGVC11223	Dairy_cattle_Rumen-6__c104	SRR12529074_1444533||full	RVD	99.952	0.946226
RGVC11224	Dairy_cattle_Rumen-6__c1086290	SRR12529074_305467||full	RVD	99.983	0.992478
RGVC11227	Dairy_cattle_Rumen-6__c1236562	SRR12529074_2746203||full	RVD	99.942	0.783199
RGVC11228	Dairy_cattle_Rumen-6__c1438062	SRR12529074_1108041||full	RVD	99.988	1
RGVC11231	Dairy_cattle_Rumen-6__c2092502	SRR12529074_565477||full	RVD	99.998	1
RGVC11233	Dairy_cattle_Rumen-6__c2353190	SRR12529074_3997179||full	RVD	99.991	0.993312
RGVC11234	Dairy_cattle_Rumen-6__c261151	SRR12529074_3715651||full	RVD	99.84	0.946265
RGVC11235	Dairy_cattle_Rumen-6__c304	SRR12529074_1355931||full	RVD	99.972	0.963931
RGVC11239	Dairy_cattle_Rumen-6__c59772	SRR12529074_4105285||full	RVD	99.978	0.848231
RGVC11241	Dairy_cattle_Rumen-6__c793927	SRR12529074_410981||full	RVD	99.765	0.99994
RGVC11242	Dairy_cattle_Rumen-6__c884471	SRR12529074_3398879||full	RVD	99.995	1
RGVC11243	Dairy_cattle_Rumen-6__c908691	SRR12529074_2988176||full	RVD	99.396	0.898372
RGVC11429	flye-dairy_16516	SRR11784291_832005||full	RVD	94.47	0.775619
RGVC12333	flye-dairy_39021	ERR3275093_1903618||full	RVD	93.692	0.755678
RGVC13077	flye-dairy_51764	SRR12021155_2183720||full	RVD	94.421	0.927228
RGVC13659	flye-dairy_58891	SRR8387714_293495||full	RVD	92.227	0.842794
RGVC13697	flye-dairy_59259	SRR12021145_1204625||full	RVD	94.128	0.763027
RGVC14452	flye-dairy_66163	ERR3275114_1508296||full	RVD	97.689	0.857288
RGVC14458	flye-dairy_66187	IMGVR_UViG_3300028914_000289|3300028914|Ga0265300_10000955	IMG/VR v4	92.06	0.811278
RGVC14669	flye-dairy_68098	ERR3275098_1242504||full	RVD	90.839	0.750587
RGVC14760	flye-dairy_68962	SRR873608_2424273||full	RVD	92.822	0.822021
RGVC14949	flye-dairy_70648	SRR873603_3169759||full	RVD	94.101	0.919238
RGVC15372	flye-dairy_74901	ERR3275094_1224906||full_1	RVD	98.443	0.776881
RGVC15977	flye-dairy_78997	ERR3211445_1403215||full	RVD	97.061	0.826512
RGVC16283	flye-dairy_80298	SRR10765506_865644||full	RVD	93.52	0.785278
RGVC16283	flye-dairy_80298	IMGVR_UViG_3300031760_000200|3300031760|Ga0326513_10000319	IMG/VR v4	94.3	0.85613
RGVC16624	flye-dairy_81285	ERR3275129_2029568||full	RVD	97.992	0.758241
RGVC16699	flye-goat_1026_1	SRR12529379_789894||full	RVD	99.994	0.802187
RGVC16706	flye-goat_10365	SRR12529380_425427||full	RVD	99.151	0.790839
RGVC16729	flye-goat_11390	SRR12529378_320941||full	RVD	99.94	0.776718
RGVC16747	flye-goat_1197	SRR12529381_95405||full	RVD	99.987	0.999771
RGVC16787	flye-goat_13542	SRR12529378_347471||full	RVD	99.599	0.933257
RGVC16823	flye-goat_15317	SRR12529378_63903||full	RVD	99.992	0.98584
RGVC16831	flye-goat_15529_1	SRR12529378_1320970||full	RVD	99.926	0.923022
RGVC16871	flye-goat_16285	SRR12529380_1593201||full	RVD	99.982	0.860229
RGVC16895	flye-goat_16729	SRR12529378_1393789||full	RVD	100	0.930732
RGVC16897	flye-goat_16821	SRR12529378_686329||full	RVD	99.994	0.991076
RGVC16901	flye-goat_16910	SRR12529381_210971||full	RVD	99.729	0.831295
RGVC16906	flye-goat_17107_1	SRR12529380_452013||full	RVD	99.989	0.854597
RGVC17019	flye-goat_20241_1	SRR12529378_755091||full_1	RVD	100	0.782377
RGVC17047	flye-goat_20520_1	SRR12529376_1243048||full_1	RVD	99.987	0.888003
RGVC17048	flye-goat_20534	SRR12529381_245139||full	RVD	99.167	0.760096
RGVC17086	flye-goat_20986	SRR12529379_348945||full	RVD	99.997	0.896261
RGVC17138	flye-goat_21383	SRR12529376_202727||full	RVD	99.939	0.927474
RGVC17164	flye-goat_21491	SRR12529378_1412088||full	RVD	99.981	0.770583
RGVC17178	flye-goat_2332_1	SRR12529377_1114206||full	RVD	99.977	0.981755
RGVC17181	flye-goat_2363_1	SRR12529379_944735||full_1	RVD	99.995	1
RGVC17209	flye-goat_3106	ERR3220218_685004||full	RVD	95.244	0.895747
RGVC17217	flye-goat_331_1	SRR12529378_708939||0_partial_1	RVD	99.997	0.989618
RGVC17221	flye-goat_3382	SRR12529379_388140||full	RVD	99.325	0.995846
RGVC17255	flye-goat_4425_2	SRR12529378_489350||full_1	RVD	100	1
RGVC17261	flye-goat_4498	SRR12529378_739791||full	RVD	99.999	0.831078
RGVC17266	flye-goat_4560_1	SRR12529378_29992||full	RVD	99.995	0.80158
RGVC17293	flye-goat_5608_1	SRR12529377_1699423||full_1	RVD	99.975	0.929717
RGVC17331	flye-goat_6458	SRR12529380_1303974||full	RVD	99.997	0.752309
RGVC17355	flye-goat_7249	SRR12529378_1548990||full	RVD	100	0.833638
RGVC17379	flye-goat_8143_1	SRR12529378_404912||full	RVD	99.509	0.985104
RGVC17420	flye-goat_9306_1	SRR7907955_324435||full	RVD	99.91	0.789297
RGVC17439	Goat_Abomasum-1__c159881	SRR12529378_1417266||full	RVD	99.973	1
RGVC17440	Goat_Abomasum-1__c167_1	SRR12529377_879245||full_1	RVD	100	1
RGVC17447	Goat_Abomasum-1__c261437	SRR12529381_524310||full	RVD	99.915	1
RGVC17448	Goat_Abomasum-1__c268084	SRR12529381_784868||full	RVD	100	0.998746
RGVC17453	Goat_Abomasum-1__c345057	SRR12529381_205095||full	RVD	99.832	0.835296
RGVC17455	Goat_Abomasum-1__c365010_1	SRR12529381_1108607||full_1	RVD	100	0.879292
RGVC17457	Goat_Abomasum-1__c403_1	SRR12529379_209511||0_partial_1	RVD	99.956	1
RGVC17463	Goat_Abomasum-1__c428044	SRR12529380_669176||full	RVD	99.988	0.992005
RGVC17468	Goat_Abomasum-1__c504745_1	SRR12529381_1025525||full	RVD	99.981	0.916709
RGVC17470	Goat_Abomasum-1__c575268_1	SRR12529380_972080||full_1	RVD	99.997	0.898678
RGVC17475	Goat_Abomasum-1__c653647	SRR12529380_777245||0_partial	RVD	99.996	1
RGVC17477	Goat_Abomasum-1__c723451	SRR12529381_1111390||full	RVD	100	0.985946
RGVC17480	Goat_Abomasum-2__c114614	SRR12529380_931993||full	RVD	99.917	0.968541
RGVC17486	Goat_Abomasum-2__c214601	SRR12529381_757181||full_1	RVD	99.979	0.893839
RGVC17489	Goat_Abomasum-2__c275350	SRR12529381_1025547||full	RVD	99.969	0.800817
RGVC17491	Goat_Abomasum-2__c307104_1	SRR12529377_1581194||full	RVD	99.969	0.854444
RGVC17500	Goat_Abomasum-2__c462	SRR12529380_603409||full	RVD	99.967	0.935141
RGVC17504	Goat_Abomasum-2__c54278	SRR12529380_204578||full	RVD	100	0.939235
RGVC17509	Goat_Abomasum-2__c922_1	SRR12529380_1056609||0_partial_1	RVD	100	1
RGVC17515	Goat_Abomasum-3__c220645	ERR3525310_57591||full_1	RVD	95.265	0.930277
RGVC17528	Goat_Abomasum-3__c346255	SRR12529325_571656||0_partial	RVD	94.134	0.896197
RGVC17529	Goat_Abomasum-3__c353_1	SRR12529377_896629||0_partial	RVD	100	1
RGVC17530	Goat_Abomasum-3__c393078	SRR12529379_139765||full	RVD	99.957	0.983384
RGVC17531	Goat_Abomasum-3__c546721	SRR12529379_1372984||full_1	RVD	99.942	0.769289
RGVC17532	Goat_Abomasum-3__c547536_1	SRR12529379_859992||full_1	RVD	99.846	1
RGVC17541	Goat_Abomasum-3__c819_1	SRR12529379_1313334||full_1	RVD	99.995	0.89592
RGVC17545	Goat_Abomasum-4__c261798	SRR12529378_321167||full	RVD	99.998	0.985432
RGVC17548	Goat_Abomasum-5__c130640	ERR3525318_1929210||full	RVD	96.451	0.786729
RGVC17550	Goat_Abomasum-5__c137	SRR12529377_1765421||full	RVD	100	0.765761
RGVC17551	Goat_Abomasum-5__c145	SRR12529377_83210||full	RVD	99.977	0.846099
RGVC17553	Goat_Abomasum-5__c181148_1	SRR11485369_167516||full	RVD	99.961	1
RGVC17554	Goat_Abomasum-5__c230996_1	SRR12529377_26524||full_1	RVD	99.995	1
RGVC17555	Goat_Abomasum-5__c265558	SRR12529377_1311778||full	RVD	99.985	0.9953
RGVC17557	Goat_Abomasum-5__c290591	SRR12529377_790800||full	RVD	99.944	0.791601
RGVC17558	Goat_Abomasum-5__c296398_1	SRR12529377_927175||full_1	RVD	100	1
RGVC17563	Goat_Abomasum-5__c378229	SRR12529377_28479||full	RVD	99.995	0.988611
RGVC17566	Goat_Abomasum-5__c397048	FH88573_656200||full	RVD	96.898	0.792647
RGVC17570	Goat_Abomasum-5__c432491	SRR12529377_1759392||full	RVD	99.991	0.933333
RGVC17574	Goat_Abomasum-5__c436945	SRR12529378_1551261||full	RVD	99.986	0.791762
RGVC17577	Goat_Abomasum-5__c485783	SRR12529377_1171723||full	RVD	99.996	1
RGVC17578	Goat_Abomasum-5__c541043	SRR12529377_10351||full	RVD	99.657	0.795708
RGVC17582	Goat_Abomasum-5__c702669	SRR12529377_1600302||full	RVD	99.942	1
RGVC17706	Goat_Cecum-2__c311390	IMGVR_UViG_3300018475_004834|3300018475|Ga0187907_10003974|657-42903	IMG/VR v4	99.92	0.821285
RGVC17740	Goat_Cecum-2__c601367	IMGVR_UViG_2914230638_000002|2914230638|2914230639|67540-123264	IMG/VR v4	94.32	0.769788
RGVC17820	Goat_Cecum-3__c676338	IMGVR_UViG_3300045988_017593|3300045988|Ga0495776_014543	IMG/VR v4	98.57	0.882542
RGVC17829	Goat_Cecum-3__c761772_1	IMGVR_UViG_3300024272_002527|3300024272|Ga0257077_10006616	IMG/VR v4	93.94	0.803292
RGVC17871	Goat_Cecum-4__c412094	SRR12529380_1191584||full	RVD	99.954	0.915572
RGVC17884	Goat_Cecum-4__c596346_1	SRR12529380_1057334||full_1	RVD	99.983	0.947836
RGVC17998	Goat_Cecum-6__c792151_1	IMGVR_UViG_3300031555_010600|3300031555|Ga0318466_10019935|3-32194	IMG/VR v4	97.12	0.926444
RGVC18007	Goat_Colon-1__c127705	ERR3211455_349602||full	RVD	94.784	0.93342
RGVC18125	Goat_Colon-2__c534_1	IMGVR_UViG_3300029705_006902|3300029705|Ga0224414_10000064|260138-334845	IMG/VR v4	98.54	0.754213
RGVC18170	Goat_Colon-3__c50696	SRR12529379_217731||full	RVD	99.979	0.880465
RGVC18177	Goat_Colon-3__c609497	IMGVR_UViG_3300024270_004812|3300024270|Ga0257091_10000019|297145-347474	IMG/VR v4	98.42	0.75771
RGVC18178	Goat_Colon-3__c622836_1	IMGVR_UViG_3300029305_011831|3300029305|Ga0307249_10003727|17203-53954	IMG/VR v4	98.33	0.971731
RGVC18283	Goat_Colon-6__c848241	ERR3224586_4401||full	RVD	97.138	0.876903
RGVC18283	Goat_Colon-6__c848241	IMGVR_UViG_3300045988_168040|3300045988|Ga0495776_114404	IMG/VR v4	98.62	0.876903
RGVC18302	Goat_Duodenum-1__c163500	SRR12529381_1490992||full	RVD	99.998	0.852074
RGVC18303	Goat_Duodenum-1__c164627	SRR12529381_466285||full	RVD	99.954	1
RGVC18309	Goat_Duodenum-1__c177622	SRR12529381_1481022||full	RVD	99.967	0.944695
RGVC18317	Goat_Duodenum-1__c212098	SRR12529379_831329||full	RVD	99.996	0.978133
RGVC18347	Goat_Duodenum-1__c372010	SRR12529381_505824||full	RVD	99.974	1
RGVC18352	Goat_Duodenum-1__c401	SRR12529381_1505476||full	RVD	99.995	0.966198
RGVC18356	Goat_Duodenum-1__c425	SRR12529381_1483416||full	RVD	99.976	0.847242
RGVC18364	Goat_Duodenum-1__c55880	FH88510_33984||full	RVD	93.297	0.827469
RGVC18369	Goat_Duodenum-1__c69	SRR12529381_828079||full_1	RVD	99.993	0.901525
RGVC18374	Goat_Duodenum-1__c796	SRR12529381_1366121||full	RVD	99.991	0.844794
RGVC18377	Goat_Duodenum-1__c879	SRR12529381_119448||full	RVD	99.913	0.998057
RGVC18384	Goat_Duodenum-2__c106317	SRR12529380_514231||full_1	RVD	99.985	0.977753
RGVC18386	Goat_Duodenum-2__c119838_1	SRR12529380_1081076||full_1	RVD	99.997	1
RGVC18387	Goat_Duodenum-2__c128284	SRR12529380_1627441||full	RVD	99.819	0.999381
RGVC18388	Goat_Duodenum-2__c136594_1	SRR12529380_1481988||full_1	RVD	99.998	1
RGVC18390	Goat_Duodenum-2__c174665	SRR12529380_735356||full	RVD	99.988	0.997728
RGVC18393	Goat_Duodenum-2__c209073_1	SRR9651418_44534||full_1	RVD	95.671	0.828747
RGVC18393	Goat_Duodenum-2__c209073_1	IMGVR_UViG_649989958_000003|649989958|649991973|15356-51094	IMG/VR v4	96.22	0.828671
RGVC18400	Goat_Duodenum-3__c102601	SRR12529379_1406917||full	RVD	100	0.855577
RGVC18404	Goat_Duodenum-3__c110604	SRR12529376_1299234||full	RVD	100	0.799738
RGVC18415	Goat_Duodenum-3__c161687	SRR12529379_1415567||full	RVD	99.981	0.985854
RGVC18416	Goat_Duodenum-3__c182_1	SRR12529377_1594296||full	RVD	99.921	0.983694
RGVC18422	Goat_Duodenum-3__c209111	SRR12529379_877988||full	RVD	99.997	0.794438
RGVC18425	Goat_Duodenum-3__c232429	IMGVR_UViG_2917309686_000001|2917309686|2917309686|566786-575883	IMG/VR v4	99.94	0.920345
RGVC18439	Goat_Duodenum-3__c255784	SRR12529379_425685||full	RVD	100	0.999069
RGVC18441	Goat_Duodenum-3__c297	SRR12529376_1291714||full	RVD	99.992	0.89932
RGVC18442	Goat_Duodenum-3__c302887	SRR12529379_123720||full	RVD	99.956	1
RGVC18452	Goat_Duodenum-3__c361153	virsorter_curated_818	PIGEON	99.507	0.930709
RGVC18452	Goat_Duodenum-3__c361153	IMGVR_UViG_2870271864_000001|2870271864|2870271867	IMG/VR v4	99.49	0.940733
RGVC18456	Goat_Duodenum-3__c51079	SRR12529379_866560||full	RVD	99.949	0.750744
RGVC18462	Goat_Duodenum-3__c605	SRR12529379_1077559||full	RVD	99.992	0.995646
RGVC18463	Goat_Duodenum-3__c62144	SRR12529379_1241007||full	RVD	99.995	0.819631
RGVC18479	Goat_Duodenum-5__c116043_1	SRR12529377_406402||full_1	RVD	100	0.954866
RGVC18483	Goat_Duodenum-5__c244606	SRR12529377_1592305||full	RVD	99.913	0.874662
RGVC18491	Goat_Duodenum-6__c170793_1	SRR12529378_1139120||full_1	RVD	100	1
RGVC18496	Goat_Ileum-1__c104458	SRR12529381_5197||full	RVD	99.989	0.750605
RGVC18511	Goat_Ileum-1__c188113	SRR12529381_847804||full	RVD	99.954	0.986127
RGVC18512	Goat_Ileum-1__c193114	SRR12529381_286082||full	RVD	99.477	1
RGVC18518	Goat_Ileum-1__c270461_1	ERR3275108_329679||full_1	RVD	99.726	0.878444
RGVC18540	Goat_Ileum-2__c108779	SRR12529380_287721||full	RVD	99.996	0.97963
RGVC18545	Goat_Ileum-2__c113210	SRR12529380_19619||full	RVD	99.964	0.99421
RGVC18562	Goat_Ileum-2__c193	SRR12529380_283151||full	RVD	99.993	0.888009
RGVC18565	Goat_Ileum-2__c210579	SRR12529380_1218301||full	RVD	99.995	0.997158
RGVC18571	Goat_Ileum-2__c245_1	SRR12529380_28598||full	RVD	99.934	0.972112
RGVC18595	Goat_Ileum-3__c153768	SRR12529379_707224||full	RVD	99.956	0.871238
RGVC18604	Goat_Ileum-3__c240034	SRR12529379_1433136||full	RVD	99.993	0.825927
RGVC18605	Goat_Ileum-3__c265595	SRR12529379_1472629||full	RVD	99.997	0.768088
RGVC18614	Goat_Ileum-3__c56151	IMGVR_UViG_3300028886_000459|3300028886|Ga0256407_10007125	IMG/VR v4	92.23	0.993338
RGVC18624	Goat_Ileum-4__c216023	SRR12021150_2254781||full	RVD	99.98	0.866853
RGVC18624	Goat_Ileum-4__c216023	IMGVR_UViG_2773857974_000001|2773857974|2773880732	IMG/VR v4	99.98	1
RGVC18624	Goat_Ileum-4__c216023	uvig_539815	GPD	99.973	0.921955
RGVC18630	Goat_Ileum-4__c258290_1	SRR12529380_1227176||full	RVD	99.946	0.829253
RGVC18672	Goat_Ileum-6__c148739	SRR12529376_1340689||full	RVD	99.979	0.848275
RGVC18716	Goat_Ileum-6__c60_1	SRR12529376_276720||0_partial_1	RVD	100	0.971849
RGVC18717	Goat_Ileum-6__c6882	SRR12529376_261679||full	RVD	99.995	0.835789
RGVC18734	Goat_Jejunum-1__c116258	SRR12529381_129346||full	RVD	99.982	0.898421
RGVC18737	Goat_Jejunum-1__c126149_1	SRR12529381_1419194||full_1	RVD	99.994	0.99634
RGVC18741	Goat_Jejunum-1__c136751	SRR12529381_1550381||full	RVD	99.984	0.979154
RGVC18744	Goat_Jejunum-1__c154465	SRR12529381_1489399||full	RVD	99.981	0.916088
RGVC18746	Goat_Jejunum-1__c166159	ERR3224594_2507669||full	RVD	95.517	0.824896
RGVC18748	Goat_Jejunum-1__c17866	SRR12529381_150599||full	RVD	99.981	0.992028
RGVC18755	Goat_Jejunum-1__c2	SRR12529381_1580698||full	RVD	100	0.997931
RGVC18758	Goat_Jejunum-1__c202854	SRR12529381_1511822||full	RVD	99.987	0.992514
RGVC18773	Goat_Jejunum-1__c370735	SRR12529381_7943||full	RVD	99.988	0.997806
RGVC18775	Goat_Jejunum-1__c386611	SRR12529381_442400||full	RVD	100	0.988172
RGVC18798	Goat_Jejunum-2__c102	SRR12529380_305888||full	RVD	99.997	0.990524
RGVC18805	Goat_Jejunum-2__c126477	SRR12529380_1315143||full	RVD	99.926	0.873561
RGVC18814	Goat_Jejunum-2__c171	SRR12529378_1254403||full	RVD	99.961	0.868559
RGVC18820	Goat_Jejunum-2__c200854	SRR12529380_897150||full	RVD	99.989	0.778773
RGVC18839	Goat_Jejunum-2__c265524	IMGVR_UViG_3300029305_002175|3300029305|Ga0307249_10066191	IMG/VR v4	97.25	0.989516
RGVC18849	Goat_Jejunum-2__c298	SRR12529380_1604025||full	RVD	99.999	0.840762
RGVC18851	Goat_Jejunum-2__c310463	SRR12529380_189352||full	RVD	99.991	0.997984
RGVC18858	Goat_Jejunum-2__c41951	SRR11485367_391263||full	RVD	94.101	0.939746
RGVC18875	Goat_Jejunum-2__c86352	SRR12529380_273026||full	RVD	99.949	0.879344
RGVC18884	Goat_Jejunum-3__c110	SRR12529379_1254062||full	RVD	100	0.83324
RGVC18900	Goat_Jejunum-3__c153	SRR12529379_309305||full	RVD	99.981	0.978956
RGVC18904	Goat_Jejunum-3__c173	SRR12529379_738690||full	RVD	99.993	0.961825
RGVC18920	Goat_Jejunum-3__c236842_1	SRR12529379_36138||full_1	RVD	99.997	0.770016
RGVC18924	Goat_Jejunum-3__c246004	SRR6197820_323061||full	RVD	96.296	0.810977
RGVC18929	Goat_Jejunum-3__c265040	SRR12529379_1416621||full	RVD	99.998	0.99185
RGVC18933	Goat_Jejunum-3__c278078	SRR12529379_890399||full	RVD	99.749	0.871046
RGVC18941	Goat_Jejunum-3__c303769	SRR12529379_1427507||full	RVD	99.997	0.840602
RGVC18945	Goat_Jejunum-3__c326044	SRR12529380_844814||full	RVD	99.994	0.925821
RGVC18954	Goat_Jejunum-3__c361253	ERR3224608_462643||full	RVD	91.181	0.822485
RGVC18959	Goat_Jejunum-3__c376	SRR12529379_1423383||full	RVD	99.997	0.893132
RGVC18961	Goat_Jejunum-3__c381465	SRR12529379_961616||full	RVD	99.976	0.830456
RGVC18963	Goat_Jejunum-3__c388091	ERR3275130_502998||full	RVD	91.397	0.813419
RGVC18964	Goat_Jejunum-3__c392380_1	SRR12529379_458267||full_1	RVD	99.995	1
RGVC18974	Goat_Jejunum-3__c436008	SRR12529380_174561||full	RVD	99.543	0.879683
RGVC18983	Goat_Jejunum-3__c60205	SRR12529379_443026||full	RVD	99.933	0.864014
RGVC18994	Goat_Jejunum-4__c107280	SRR12529378_1243618||full	RVD	99.967	1
RGVC18996	Goat_Jejunum-4__c115	SRR12529378_296669||full	RVD	100	0.845285
RGVC18997	Goat_Jejunum-4__c139263	ERR3224567_865731||full	RVD	97.769	0.758532
RGVC19016	Goat_Jejunum-5__c160979	gary_all20_4278	PIGEON	99.696	0.880787
RGVC19016	Goat_Jejunum-5__c160979	IMGVR_UViG_2537562207_000002|2537562207|2537633855|35121-74049	IMG/VR v4	99.99	1
RGVC19022	Goat_Jejunum-5__c192670	SRR12529377_125573||full	RVD	99.991	0.994622
RGVC19024	Goat_Jejunum-5__c194362	SRR12529377_784629||full	RVD	99.988	0.970754
RGVC19028	Goat_Jejunum-5__c22	SRR12529377_15651||full	RVD	99.991	0.788942
RGVC19029	Goat_Jejunum-5__c231	SRR12529377_1277408||full	RVD	99.993	0.770603
RGVC19030	Goat_Jejunum-5__c232	SRR12529377_695285||full	RVD	99.993	0.862533
RGVC19032	Goat_Jejunum-5__c24	SRR12529377_258588||full	RVD	100	0.754453
RGVC19043	Goat_Jejunum-5__c56342	SRR12529377_1345522||full	RVD	99.945	0.982234
RGVC19053	Goat_Jejunum-5__c7	SRR12529377_1460555||full	RVD	99.93	0.860517
RGVC19056	Goat_Jejunum-5__c74108	SRR11585830_149610||full	RVD	96.566	0.871595
RGVC19056	Goat_Jejunum-5__c74108	IMGVR_UViG_3300031998_000306|3300031998|Ga0310786_10001325	IMG/VR v4	96.22	0.787116
RGVC19068	Goat_Jejunum-6__c105185	SRR12529376_587326||full	RVD	99.903	0.998477
RGVC19093	Goat_Jejunum-6__c2886	SRR12529376_760801||full	RVD	100	0.8525
RGVC19096	Goat_Jejunum-6__c33565	SRR12529376_418946||full	RVD	99.97	0.990807
RGVC19109	Goat_Jejunum-6__c87764	SRR12529376_415249||full	RVD	99.821	0.780949
RGVC19116	Goat_Jejunum-6__c99	SRR12529376_731817||full	RVD	99.991	0.989454
RGVC19123	Goat_Omasum-1__c190929	SRR12529381_1511546||full_1	RVD	99.99	0.75845
RGVC19128	Goat_Omasum-1__c266684	SRR12529380_1534077||full	RVD	99.989	0.909525
RGVC19130	Goat_Omasum-1__c350481_1	SRR12529378_425513||full_1	RVD	99.997	0.984463
RGVC19138	Goat_Omasum-1__c494962_1	SRR12529381_1533499||full	RVD	99.991	0.91516
RGVC19153	Goat_Omasum-1__c705814	SRR12529381_172495||full_1	RVD	99.967	1
RGVC19160	Goat_Omasum-2__c102933	SRR12529377_1212802||full_1	RVD	99.992	0.981968
RGVC19164	Goat_Omasum-2__c197033_1	SRR12529381_115310||full_1	RVD	99.959	0.863619
RGVC19175	Goat_Omasum-2__c394096	SRR12529380_1350281||full	RVD	99.994	0.939411
RGVC19182	Goat_Omasum-2__c481628_1	SRR12529381_1190405||full	RVD	99.977	0.926048
RGVC19183	Goat_Omasum-2__c484950_1	SRR12529380_1429113||full_1	RVD	99.981	0.932032
RGVC19193	Goat_Omasum-2__c608_1	SRR12529380_1329719||full	RVD	99.99	1
RGVC19198	Goat_Omasum-2__c828	SRR12529380_570327||full	RVD	99.989	0.962679
RGVC19207	Goat_Omasum-3__c251857	SRR12529378_169236||full_1	RVD	99.157	0.770924
RGVC19224	Goat_Omasum-3__c544902	SRR12529378_203845||full	RVD	99.994	0.90773
RGVC19239	Goat_Omasum-3__c84892	SRR12529378_719520||0_partial	RVD	99.997	0.757287
RGVC19242	Goat_Omasum-4__c1	SRR12529378_500066||full	RVD	100	0.804743
RGVC19244	Goat_Omasum-4__c116379	SRR12529378_797815||full	RVD	99.983	0.964461
RGVC19271	Goat_Omasum-4__c459687_1	SRR12529378_765289||full_1	RVD	99.996	1
RGVC19276	Goat_Omasum-4__c519255	SRR12529379_348002||full	RVD	100	0.946329
RGVC19281	Goat_Omasum-4__c80264	SRR12529378_317442||full	RVD	99.965	0.852477
RGVC19282	Goat_Omasum-4__c92109_1	SRR12529377_636286||full_1	RVD	99.989	0.872086
RGVC19284	Goat_Omasum-5__c119297	SRR12529377_1711233||full	RVD	99.986	0.974016
RGVC19294	Goat_Omasum-5__c413431	SRR12529377_1082619||full	RVD	100	0.863268
RGVC19302	Goat_Omasum-5__c5091_1	SRR12529377_826340||full_1	RVD	99.997	1
RGVC19305	Goat_Omasum-5__c541802	SRR12529377_559261||full	RVD	99.907	0.760417
RGVC19312	Goat_Omasum-5__c605558_1	SRR12529377_1749176||0_partial_1	RVD	99.944	0.97735
RGVC19322	Goat_Omasum-6__c15760	SRR12529381_186813||0_partial	RVD	98.453	0.936731
RGVC19353	Goat_Omasum-6__c727770	SRR12529376_1249804||full	RVD	99.99	0.98706
RGVC19590	Goat_Rectum-5__c534916	IMGVR_UViG_3300019378_000059|3300019378|Ga0187901_10001102	IMG/VR v4	99.93	0.766633
RGVC19655	Goat_Reticulum-1__c135050	SRR12529378_201484||full	RVD	99.987	0.881404
RGVC19663	Goat_Reticulum-1__c305403	SRR12529381_1516947||full	RVD	99.974	0.935571
RGVC19665	Goat_Reticulum-1__c326561_1	SRR12529381_113544||full_1	RVD	100	0.825462
RGVC19666	Goat_Reticulum-1__c338168_1	SRR12529381_1171786||full_1	RVD	100	0.822703
RGVC19668	Goat_Reticulum-1__c421243	SRR12529381_1429454||full	RVD	99.997	0.793561
RGVC19672	Goat_Reticulum-1__c532937	SRR12529381_772799||full	RVD	99.995	1
RGVC19673	Goat_Reticulum-1__c567083	SRR12529381_1427356||full	RVD	99.93	0.821358
RGVC19679	Goat_Reticulum-1__c676726_1	SRR12529381_1496173||full_1	RVD	99.995	0.902545
RGVC19680	Goat_Reticulum-1__c697420	SRR12529381_113967||full	RVD	100	0.999649
RGVC19681	Goat_Reticulum-1__c707115_1	SRR12529381_1168607||full_1	RVD	100	0.91594
RGVC19685	Goat_Reticulum-2__c152025_1	SRR12529380_333595||full	RVD	99.988	1
RGVC19687	Goat_Reticulum-2__c171190_1	SRR12529378_457654||full_1	RVD	99.995	0.869434
RGVC19690	Goat_Reticulum-2__c198887	SRR12529380_780286||full	RVD	100	0.885031
RGVC19694	Goat_Reticulum-2__c276	SRR12529377_1599891||full	RVD	99.985	0.97612
RGVC19698	Goat_Reticulum-2__c29520	SRR12529381_598288||full_1	RVD	99.976	0.815712
RGVC19699	Goat_Reticulum-2__c318116	SRR12529381_1183762||full	RVD	96.536	0.8453
RGVC19700	Goat_Reticulum-2__c323561	SRR12529380_341450||full	RVD	99.944	1
RGVC19706	Goat_Reticulum-2__c428533	SRR12529380_852478||full	RVD	99.996	0.780547
RGVC19709	Goat_Reticulum-2__c446459_1	SRR12529378_328073||full	RVD	99.876	0.860813
RGVC19712	Goat_Reticulum-2__c476953	SRR12529379_1422262||full	RVD	99.991	0.861809
RGVC19714	Goat_Reticulum-2__c498181	SRR12529380_126745||full	RVD	99.968	0.862159
RGVC19717	Goat_Reticulum-2__c527486_1	SRR12529380_1344053||full_1	RVD	100	1
RGVC19729	Goat_Reticulum-2__c91847_1	SRR12529380_673994||full_1	RVD	99.994	0.997256
RGVC19730	Goat_Reticulum-2__c95343	SRR12529379_412908||full	RVD	99.985	1
RGVC19735	Goat_Reticulum-3__c157143	SRR12529379_1389277||full	RVD	100	0.917091
RGVC19741	Goat_Reticulum-3__c296967	SRR12529379_165367||full	RVD	99.995	0.99906
RGVC19742	Goat_Reticulum-3__c300760	SRR12529379_337432||full	RVD	100	1
RGVC19743	Goat_Reticulum-3__c309	SRR12529376_397601||full	RVD	99.993	0.859163
RGVC19745	Goat_Reticulum-3__c318819_1	SRR12529379_181929||0_partial_1	RVD	100	0.92734
RGVC19746	Goat_Reticulum-3__c323923_1	SRR12529379_178890||full_1	RVD	99.979	0.866888
RGVC19748	Goat_Reticulum-3__c329125_1	SRR12529379_379471||full	RVD	100	1
RGVC19749	Goat_Reticulum-3__c351532	SRR12529379_1543213||full	RVD	99.979	0.874115
RGVC19751	Goat_Reticulum-3__c366693	SRR12529379_1201310||full	RVD	99.997	0.904597
RGVC19763	Goat_Reticulum-3__c623998_1	SRR12529379_1490581||full_1	RVD	99.997	0.953432
RGVC19764	Goat_Reticulum-3__c714546	SRR12529379_920366||full	RVD	99.974	1
RGVC19771	Goat_Reticulum-3__c746713	SRR9651415_68972||full	RVD	96.127	0.813798
RGVC19774	Goat_Reticulum-3__c801_1	SRR12529377_351943||full_1	RVD	99.979	0.989199
RGVC19781	Goat_Reticulum-4__c181975_1	SRR12529378_371641||0_partial_1	RVD	100	1
RGVC19784	Goat_Reticulum-4__c289657	SRR12529378_1618324||full	RVD	99.981	0.805392
RGVC19787	Goat_Reticulum-4__c331378	SRR12529378_268146||full	RVD	99.969	0.861957
RGVC19790	Goat_Reticulum-4__c452582_1	SRR12529376_623405||0_partial_1	RVD	99.993	0.90382
RGVC19792	Goat_Reticulum-4__c527723_1	SRR12529378_287401||full_1	RVD	100	1
RGVC19794	Goat_Reticulum-4__c69121	SRR12529378_1468286||full	RVD	99.997	0.750249
RGVC19797	Goat_Reticulum-4__c82584_1	SRR12529380_955113||full_1	RVD	99.993	0.83879
RGVC19803	Goat_Reticulum-5__c131350	SRR12529377_405123||full	RVD	99.986	0.856811
RGVC19806	Goat_Reticulum-5__c150769	SRR12529377_1725475||full	RVD	99.98	0.98827
RGVC19807	Goat_Reticulum-5__c159873	SRR12529377_1047122||full	RVD	99.986	0.97239
RGVC19811	Goat_Reticulum-5__c220161	ERR3211464_35892||0_partial	RVD	94.359	0.80707
RGVC19815	Goat_Reticulum-5__c292659	SRR12529377_52671||full	RVD	99.982	0.968529
RGVC19816	Goat_Reticulum-5__c302477	ERR4297095_1312923||full	RVD	93.158	0.867409
RGVC19822	Goat_Reticulum-5__c355473	SRR12529377_465306||full_1	RVD	99.995	0.800403
RGVC19824	Goat_Reticulum-5__c372620_1	SRR12529377_61675||full_1	RVD	99.91	0.999956
RGVC19826	Goat_Reticulum-5__c389578_1	SRR12529376_1125233||full	RVD	100	0.820459
RGVC19829	Goat_Reticulum-5__c438758	SRR12529377_176533||full	RVD	99.953	0.985095
RGVC19839	Goat_Reticulum-5__c633621	SRR12529377_7169||full	RVD	99.889	0.815491
RGVC19840	Goat_Reticulum-5__c676405	SRR12529377_817025||0_partial	RVD	99.998	1
RGVC19843	Goat_Reticulum-6__c11127	SRR12529376_222743||full	RVD	99.959	0.887468
RGVC19848	Goat_Reticulum-6__c242437	SRR12529376_222263||full	RVD	99.99	0.858933
RGVC19852	Goat_Reticulum-6__c287842	SRR12529376_102493||full	RVD	99.919	0.918116
RGVC19857	Goat_Reticulum-6__c406702_1	SRR12529376_1432994||full_1	RVD	100	0.982782
RGVC19858	Goat_Reticulum-6__c413895_1	SRR12529377_256276||full	RVD	99.993	0.879586
RGVC19864	Goat_Reticulum-6__c549044_1	SRR12529377_637316||0_partial_1	RVD	100	0.989558
RGVC19865	Goat_Reticulum-6__c581_1	SRR12529376_73639||0_partial	RVD	100	0.76527
RGVC19869	Goat_Rumen-1__c105112	SRR12529381_602133||full	RVD	99.991	1
RGVC19870	Goat_Rumen-1__c10832	SRR12529381_148462||full	RVD	99.994	0.87047
RGVC19873	Goat_Rumen-1__c144330	SRR12529381_579665||full	RVD	99.944	0.994418
RGVC19878	Goat_Rumen-1__c159182	SRR12529381_1274765||full	RVD	99.986	1
RGVC19883	Goat_Rumen-1__c187187	SRR12529381_337771||0_partial	RVD	99.986	0.875366
RGVC19884	Goat_Rumen-1__c18832	SRR12529381_616381||full	RVD	99.995	1
RGVC19885	Goat_Rumen-1__c188794	SRR12529381_169748||full	RVD	99.909	0.99198
RGVC19886	Goat_Rumen-1__c198250	SRR12529381_284591||full	RVD	99.998	1
RGVC19889	Goat_Rumen-1__c217325	SRR12529381_895367||full	RVD	99.998	0.998745
RGVC19890	Goat_Rumen-1__c223147_1	SRR12529381_1101617||full_1	RVD	99.997	1
RGVC19890	Goat_Rumen-1__c223147_1	uvig_347238	GPD	92.575	0.765199
RGVC19892	Goat_Rumen-1__c235443	SRR12529381_1478601||full	RVD	99.997	1
RGVC19893	Goat_Rumen-1__c2356	SRR12529381_481417||full	RVD	100	0.760642
RGVC19895	Goat_Rumen-1__c244454	SRR12529381_1464594||full	RVD	99.994	1
RGVC19897	Goat_Rumen-1__c252610	SRR12529381_927312||full	RVD	99.994	1
RGVC19898	Goat_Rumen-1__c2530	SRR12529381_777444||full	RVD	99.696	0.988666
RGVC19900	Goat_Rumen-1__c267426	SRR12529381_701313||full	RVD	99.979	1
RGVC19901	Goat_Rumen-1__c26873	SRR12529376_785861||full_1	RVD	100	0.997144
RGVC19905	Goat_Rumen-1__c289453	SRR12529379_1174757||full	RVD	99.997	0.991342
RGVC19909	Goat_Rumen-1__c3166	SRR12529381_1149722||full	RVD	99.962	0.862616
RGVC19911	Goat_Rumen-1__c3189	SRR12529381_962068||full	RVD	99.996	1
RGVC19913	Goat_Rumen-1__c320772	SRR12529381_1157159||full	RVD	100	1
RGVC19914	Goat_Rumen-1__c321794	SRR12529381_46651||full	RVD	99.994	0.996179
RGVC19915	Goat_Rumen-1__c339597	SRR12529381_1552769||full	RVD	99.976	1
RGVC19916	Goat_Rumen-1__c340854	SRR12529381_1425462||full	RVD	99.948	1
RGVC19918	Goat_Rumen-1__c354269_1	SRR12529381_598288||full_1	RVD	99.981	0.996799
RGVC19919	Goat_Rumen-1__c356882	SRR12529381_1382012||full	RVD	99.998	0.999333
RGVC19920	Goat_Rumen-1__c36274	SRR12529381_1072646||full	RVD	99.993	0.997021
RGVC19921	Goat_Rumen-1__c377567_1	SRR12529381_328573||full_1	RVD	99.992	1
RGVC19922	Goat_Rumen-1__c379760	SRR12529381_1180604||full	RVD	100	1
RGVC19927	Goat_Rumen-1__c415219	SRR12529381_690559||full	RVD	99.998	1
RGVC19928	Goat_Rumen-1__c421126	SRR12529381_1158874||full	RVD	99.973	0.917725
RGVC19929	Goat_Rumen-1__c426188_1	SRR12529377_749741||full_1	RVD	99.993	0.999699
RGVC19936	Goat_Rumen-1__c507864	SRR12529381_1513871||full	RVD	99.835	0.994925
RGVC19937	Goat_Rumen-1__c521160	SRR12529381_636560||full	RVD	99.911	0.789243
RGVC19939	Goat_Rumen-1__c531267	SRR12529377_719300||full	RVD	99.976	0.771387
RGVC19941	Goat_Rumen-1__c532612_1	SRR12529381_334176||full_1	RVD	99.988	0.980255
RGVC19942	Goat_Rumen-1__c543800	SRR12529381_12425||full	RVD	99.978	0.999356
RGVC19946	Goat_Rumen-1__c580901	SRR12529381_687355||full	RVD	99.993	0.993568
RGVC19955	Goat_Rumen-1__c621673	SRR12529381_88966||full	RVD	99.978	1
RGVC19956	Goat_Rumen-1__c63782_1	SRR12529381_409844||full_1	RVD	99.993	1
RGVC19957	Goat_Rumen-1__c642400	SRR12529381_631569||full	RVD	99.998	1
RGVC19958	Goat_Rumen-1__c661460	SRR12529381_1226385||full	RVD	99.868	0.886494
RGVC19959	Goat_Rumen-1__c678662	SRR12529381_1240237||full	RVD	99.984	1
RGVC19960	Goat_Rumen-1__c685851	SRR12529381_1411758||full	RVD	99.996	1
RGVC19962	Goat_Rumen-1__c705122	SRR12529381_259603||full	RVD	99.994	1
RGVC19963	Goat_Rumen-1__c707511	SRR12529381_1560884||full	RVD	99.995	0.879397
RGVC19965	Goat_Rumen-1__c736897	SRR12529381_1570580||full	RVD	99.94	0.886658
RGVC19969	Goat_Rumen-1__c753525	SRR12529381_1233511||full	RVD	99.988	1
RGVC19970	Goat_Rumen-1__c7581	SRR12529381_1328978||full	RVD	99.996	0.999416
RGVC19971	Goat_Rumen-1__c759646	SRR12529381_204704||full	RVD	99.992	1
RGVC19972	Goat_Rumen-1__c787030	SRR12529381_334473||full_1	RVD	99.982	0.987144
RGVC19973	Goat_Rumen-1__c792081	SRR12529381_1332405||full	RVD	99.993	1
RGVC19974	Goat_Rumen-1__c795820	SRR12529381_1232210||full	RVD	99.889	1
RGVC19975	Goat_Rumen-1__c803235	SRR12529381_26485||full	RVD	99.838	0.978227
RGVC19978	Goat_Rumen-1__c810318_1	SRR12529381_768140||full_1	RVD	99.97	1
RGVC19979	Goat_Rumen-1__c816478	SRR12529381_1289906||full	RVD	99.997	1
RGVC19980	Goat_Rumen-1__c822874	SRR12529381_355058||full	RVD	99.974	1
RGVC19981	Goat_Rumen-1__c823431	SRR12529381_71340||full	RVD	99.995	0.998378
RGVC19984	Goat_Rumen-1__c832208	SRR12529380_528403||full	RVD	99.938	0.962532
RGVC19986	Goat_Rumen-1__c83516	SRR12529381_991305||full	RVD	100	0.999703
RGVC19987	Goat_Rumen-1__c837871	SRR12529381_809306||full	RVD	99.99	1
RGVC19988	Goat_Rumen-1__c847340	SRR12529381_1412810||full	RVD	100	1
RGVC19991	Goat_Rumen-1__c879548	SRR12529381_1067320||full	RVD	99.836	0.999051
RGVC19992	Goat_Rumen-1__c882923	SRR12529381_1237846||0_partial	RVD	99.983	1
RGVC19993	Goat_Rumen-1__c90159	SRR12529381_213125||full	RVD	99.987	1
RGVC19995	Goat_Rumen-1__c922671	SRR12529381_717993||full	RVD	99.978	1
RGVC19996	Goat_Rumen-1__c926635	SRR12529381_1469945||full	RVD	100	1
RGVC19997	Goat_Rumen-1__c930300_1	SRR12529381_120182||full_1	RVD	100	1
RGVC19999	Goat_Rumen-1__c931	SRR12529381_514311||full	RVD	99.998	1
RGVC20001	Goat_Rumen-1__c947457_1	SRR12529381_1165418||full_1	RVD	99.993	1
RGVC20002	Goat_Rumen-1__c948618	SRR12529381_547756||full	RVD	99.95	1
RGVC20003	Goat_Rumen-1__c955611	ERR4297102_1500295||full	RVD	97.061	0.836818
RGVC20006	Goat_Rumen-1__c977846	SRR12529381_282816||full	RVD	99.995	0.789995
RGVC20007	Goat_Rumen-1__c995572	SRR12529381_598444||full	RVD	99.997	0.758268
RGVC20010	Goat_Rumen-2__c1011509	SRR12529380_654564||full	RVD	99.958	0.809511
RGVC20011	Goat_Rumen-2__c1021298	SRR12529380_1064742||full	RVD	99.992	1
RGVC20014	Goat_Rumen-2__c107068	SRR12529377_1134694||full	RVD	99.659	0.976151
RGVC20015	Goat_Rumen-2__c109871	SRR12529380_15076||full	RVD	99.992	0.909836
RGVC20018	Goat_Rumen-2__c119239	SRR12529380_881079||full	RVD	99.996	1
RGVC20020	Goat_Rumen-2__c124904	SRR12529380_1415188||full	RVD	99.996	1
RGVC20021	Goat_Rumen-2__c128020	SRR12529380_1340963||full	RVD	99.75	0.956953
RGVC20023	Goat_Rumen-2__c136535	SRR12529380_1616939||full	RVD	99.992	1
RGVC20024	Goat_Rumen-2__c137987	SRR12529380_644824||full	RVD	99.993	0.999198
RGVC20026	Goat_Rumen-2__c147288	SRR12529380_339313||full	RVD	99.949	1
RGVC20027	Goat_Rumen-2__c149642_1	SRR12529380_153448||full_1	RVD	99.995	1
RGVC20029	Goat_Rumen-2__c1578_1	SRR12529380_37472||full	RVD	99.993	0.89645
RGVC20030	Goat_Rumen-2__c162683_1	SRR12529380_6800||full_1	RVD	100	1
RGVC20032	Goat_Rumen-2__c1637	SRR12529380_1227523||full	RVD	99.997	1
RGVC20033	Goat_Rumen-2__c171900	SRR12529380_1056799||full	RVD	99.998	1
RGVC20034	Goat_Rumen-2__c174017	SRR12529380_526346||full	RVD	99.996	1
RGVC20036	Goat_Rumen-2__c188934	SRR12529380_599979||full	RVD	99.996	1
RGVC20038	Goat_Rumen-2__c19293	SRR12529376_37342||full	RVD	99.993	1
RGVC20040	Goat_Rumen-2__c197420	SRR12529380_33125||full	RVD	99.974	0.991183
RGVC20041	Goat_Rumen-2__c2013	SRR12529380_444403||full	RVD	99.998	0.813212
RGVC20045	Goat_Rumen-2__c220974	SRR12529380_131568||full	RVD	99.901	0.940637
RGVC20046	Goat_Rumen-2__c222741_1	SRR12529380_172663||full_1	RVD	99.996	1
RGVC20047	Goat_Rumen-2__c223288	SRR12529378_695481||full	RVD	99.51	0.995608
RGVC20048	Goat_Rumen-2__c223659	SRR12529380_1177312||full	RVD	100	1
RGVC20050	Goat_Rumen-2__c229901	SRR12529380_1598148||full	RVD	99.99	0.868095
RGVC20052	Goat_Rumen-2__c231685_1	SRR12529380_1586469||0_partial_1	RVD	99.995	0.971321
RGVC20053	Goat_Rumen-2__c232430	SRR12529380_1232597||full	RVD	99.994	0.994523
RGVC20054	Goat_Rumen-2__c23462	SRR12529380_838181||full	RVD	99.987	1
RGVC20055	Goat_Rumen-2__c2422	SRR12529380_1530185||full	RVD	100	0.918888
RGVC20056	Goat_Rumen-2__c2466_1	SRR12529380_776032||full_1	RVD	100	0.99089
RGVC20058	Goat_Rumen-2__c247857	SRR12529380_635153||full	RVD	99.991	0.999305
RGVC20059	Goat_Rumen-2__c248766	SRR12529380_430508||full	RVD	100	1
RGVC20060	Goat_Rumen-2__c249228	SRR12529380_1436623||full	RVD	99.993	1
RGVC20062	Goat_Rumen-2__c255322	SRR12529380_484570||full	RVD	99.997	1
RGVC20064	Goat_Rumen-2__c256097	SRR12529380_1000267||full	RVD	100	1
RGVC20065	Goat_Rumen-2__c264197_1	SRR12529380_577372||full_1	RVD	99.995	1
RGVC20067	Goat_Rumen-2__c2715	SRR12529380_1278252||full	RVD	99.988	0.830942
RGVC20069	Goat_Rumen-2__c283090	SRR12529380_800238||full	RVD	99.937	1
RGVC20071	Goat_Rumen-2__c2932	SRR12529380_1586669||full	RVD	99.997	0.917371
RGVC20074	Goat_Rumen-2__c299694	SRR12529381_1464594||full	RVD	99.95	0.999564
RGVC20080	Goat_Rumen-2__c315994	SRR8387714_692974||full	RVD	97.265	0.750678
RGVC20080	Goat_Rumen-2__c315994	IMGVR_UViG_3300028048_000152|3300028048|Ga0256405_10001582	IMG/VR v4	97.06	0.750678
RGVC20082	Goat_Rumen-2__c3173_1	SRR12529380_226832||full_1	RVD	99.996	1
RGVC20084	Goat_Rumen-2__c3278	SRR12529380_1461157||full	RVD	99.999	1
RGVC20085	Goat_Rumen-2__c335510	SRR12529380_51773||full	RVD	99.967	1
RGVC20090	Goat_Rumen-2__c374153	SRR12529380_3349||full	RVD	100	1
RGVC20091	Goat_Rumen-2__c3786	SRR12529380_284139||full	RVD	99.998	0.847183
RGVC20092	Goat_Rumen-2__c3788	SRR12529380_387724||full	RVD	100	0.935429
RGVC20097	Goat_Rumen-2__c434717_1	SRR12529380_981677||full	RVD	99.928	1
RGVC20098	Goat_Rumen-2__c434803	SRR12529380_1597522||full	RVD	99.996	0.807245
RGVC20099	Goat_Rumen-2__c45247	SRR12529380_1250183||full	RVD	99.991	1
RGVC20100	Goat_Rumen-2__c454183	SRR12529380_1457091||full	RVD	99.995	0.999847
RGVC20101	Goat_Rumen-2__c482600_1	SRR12529377_1757542||0_partial	RVD	100	0.990427
RGVC20102	Goat_Rumen-2__c490847	SRR12529380_557337||full	RVD	99.987	1
RGVC20107	Goat_Rumen-2__c54844	SRR12529380_1590625||full	RVD	99.835	0.912874
RGVC20109	Goat_Rumen-2__c551129_1	SRR12529380_93196||full_1	RVD	99.992	1
RGVC20111	Goat_Rumen-2__c584737	SRR12529380_1585270||full	RVD	99.948	0.948415
RGVC20113	Goat_Rumen-2__c591542	SRR12529380_480069||full	RVD	99.951	0.825745
RGVC20114	Goat_Rumen-2__c609140_1	SRR12529377_129426||full	RVD	99.983	0.999768
RGVC20115	Goat_Rumen-2__c612787	SRR12529380_1426320||full	RVD	99.962	0.938432
RGVC20116	Goat_Rumen-2__c626347	SRR12529380_1216415||full	RVD	99.992	1
RGVC20121	Goat_Rumen-2__c653260	SRR12529380_362353||full	RVD	99.983	1
RGVC20129	Goat_Rumen-2__c681594	SRR12529380_1608052||full	RVD	99.963	0.816295
RGVC20131	Goat_Rumen-2__c682398	SRR12529380_879990||full	RVD	99.992	1
RGVC20133	Goat_Rumen-2__c685079	SRR12529380_978525||full	RVD	99.988	1
RGVC20134	Goat_Rumen-2__c686842	SRR12529380_1588812||full	RVD	99.971	0.764756
RGVC20136	Goat_Rumen-2__c692731	SRR12529380_239877||full	RVD	99.951	0.852202
RGVC20137	Goat_Rumen-2__c695755	SRR12529380_1463469||full	RVD	99.997	0.83424
RGVC20138	Goat_Rumen-2__c698865	SRR12529380_1174002||full	RVD	99.91	0.999409
RGVC20143	Goat_Rumen-2__c715960	SRR12529380_1617699||full	RVD	100	0.983148
RGVC20144	Goat_Rumen-2__c729781	SRR12529380_1002619||full	RVD	99.997	1
RGVC20146	Goat_Rumen-2__c735	SRR12529380_1223944||full	RVD	100	1
RGVC20147	Goat_Rumen-2__c736070_1	SRR12529380_493380||full_1	RVD	99.963	1
RGVC20148	Goat_Rumen-2__c740000	SRR12529380_91595||full	RVD	99.995	0.99999
RGVC20149	Goat_Rumen-2__c74358	SRR12529380_102325||full	RVD	99.995	1
RGVC20150	Goat_Rumen-2__c756851	SRR12529380_474316||full	RVD	100	1
RGVC20153	Goat_Rumen-2__c782505	SRR12529380_1394041||full	RVD	99.99	1
RGVC20155	Goat_Rumen-2__c798250	SRR12529380_1392547||full	RVD	99.988	0.870466
RGVC20156	Goat_Rumen-2__c803331_1	SRR12529380_441033||full_1	RVD	99.971	0.8014
RGVC20157	Goat_Rumen-2__c80421	SRR12529380_254348||full_1	RVD	99.991	0.9118
RGVC20158	Goat_Rumen-2__c811548	SRR12529380_1024083||full	RVD	99.991	1
RGVC20159	Goat_Rumen-2__c822884	SRR12529380_1068204||full	RVD	99.997	0.998444
RGVC20160	Goat_Rumen-2__c823887	SRR12529380_688271||full	RVD	99.984	0.998802
RGVC20164	Goat_Rumen-2__c864250_1	SRR12529378_205565||full	RVD	99.984	0.808781
RGVC20165	Goat_Rumen-2__c868701	SRR12529380_810605||full	RVD	100	0.941357
RGVC20167	Goat_Rumen-2__c900303	SRR12529380_750686||full	RVD	99.95	1
RGVC20169	Goat_Rumen-2__c923225	SRR12529380_1688938||full	RVD	99.994	1
RGVC20171	Goat_Rumen-2__c933250	SRR12529380_281289||full	RVD	99.961	1
RGVC20172	Goat_Rumen-2__c935299	SRR12529380_1201319||full	RVD	99.048	0.961043
RGVC20173	Goat_Rumen-2__c938730	SRR12529380_96557||full	RVD	99.983	1
RGVC20175	Goat_Rumen-2__c953112	SRR12529380_917501||full	RVD	99.994	1
RGVC20177	Goat_Rumen-2__c96676	SRR12529380_1224345||full	RVD	99.997	1
RGVC20181	Goat_Rumen-2__c990910	SRR12529380_1196174||full	RVD	99.869	1
RGVC20182	Goat_Rumen-3__c1011	SRR12529379_217920||full	RVD	99.96	1
RGVC20186	Goat_Rumen-3__c113918	SRR12529379_164020||full	RVD	99.998	1
RGVC20187	Goat_Rumen-3__c114372	SRR12529379_128669||full	RVD	99.945	0.798856
RGVC20188	Goat_Rumen-3__c118039	SRR12529379_588855||full	RVD	99.967	1
RGVC20189	Goat_Rumen-3__c130493	SRR12529379_556795||full	RVD	99.988	0.996472
RGVC20191	Goat_Rumen-3__c1372_1	SRR12529379_573491||0_partial_1	RVD	100	1
RGVC20194	Goat_Rumen-3__c151430	SRR12529379_1194494||full	RVD	100	1
RGVC20200	Goat_Rumen-3__c163980	SRR12529379_1119869||full	RVD	99.995	1
RGVC20201	Goat_Rumen-3__c170921	SRR12529379_741546||full_1	RVD	100	0.907808
RGVC20207	Goat_Rumen-3__c19249	SRR12529379_502158||full	RVD	99.949	0.936552
RGVC20209	Goat_Rumen-3__c2033	SRR12529379_1430650||full	RVD	100	0.85883
RGVC20213	Goat_Rumen-3__c211009	SRR12529379_885490||full	RVD	99.976	1
RGVC20216	Goat_Rumen-3__c22353	SRR12529379_578424||full	RVD	99.806	1
RGVC20217	Goat_Rumen-3__c230275	SRR12529379_536464||full	RVD	100	0.998283
RGVC20218	Goat_Rumen-3__c235902	SRR12529379_427120||full	RVD	99.955	0.999911
RGVC20219	Goat_Rumen-3__c238719	SRR12529379_511037||full	RVD	99.993	1
RGVC20220	Goat_Rumen-3__c2434	SRR12529379_947591||full	RVD	99.92	0.774658
RGVC20221	Goat_Rumen-3__c24867	SRR12529379_312027||full_1	RVD	100	0.757624
RGVC20222	Goat_Rumen-3__c259149	SRR12529379_820424||full	RVD	99.995	0.753548
RGVC20223	Goat_Rumen-3__c265756	SRR12529379_541707||full	RVD	99.937	1
RGVC20225	Goat_Rumen-3__c27372	SRR12529379_660476||full	RVD	99.993	0.982535
RGVC20227	Goat_Rumen-3__c2815	SRR12529379_11448||full	RVD	99.996	0.811109
RGVC20233	Goat_Rumen-3__c305910	SRR12529379_1363740||full	RVD	99.994	1
RGVC20235	Goat_Rumen-3__c316440_1	SRR12529376_431095||full_1	RVD	99.997	1
RGVC20236	Goat_Rumen-3__c321235	SRR12529379_738193||full	RVD	99.998	1
RGVC20237	Goat_Rumen-3__c32801	SRR12529379_367399||full	RVD	100	0.999896
RGVC20238	Goat_Rumen-3__c342285	SRR12529379_1234771||full_1	RVD	99.995	0.990817
RGVC20239	Goat_Rumen-3__c349	SRR12529379_789894||full	RVD	100	0.943902
RGVC20240	Goat_Rumen-3__c356704_1	SRR12529379_732382||full_1	RVD	99.995	1
RGVC20241	Goat_Rumen-3__c362663_1	SRR12529269_612417||full	RVD	96.01	0.840099
RGVC20242	Goat_Rumen-3__c372199	SRR12529379_413570||full	RVD	99.847	1
RGVC20243	Goat_Rumen-3__c378300_1	SRR12529379_1114667||full_1	RVD	99.98	0.996689
RGVC20244	Goat_Rumen-3__c398736_1	SRR12529379_10621||full_1	RVD	99.997	0.998228
RGVC20245	Goat_Rumen-3__c40562	SRR12529379_551186||full_1	RVD	99.963	0.851726
RGVC20246	Goat_Rumen-3__c408822	SRR12529379_1445084||full	RVD	99.962	1
RGVC20250	Goat_Rumen-3__c416	SRR12529379_55661||full	RVD	100	0.987883
RGVC20251	Goat_Rumen-3__c418954	SRR12529379_1327829||full	RVD	99.996	0.999635
RGVC20255	Goat_Rumen-3__c44124	SRR12529376_934976||full	RVD	99.998	0.998676
RGVC20256	Goat_Rumen-3__c450056	SRR12529379_885019||full	RVD	99.997	0.957869
RGVC20257	Goat_Rumen-3__c459670	SRR12529379_1073165||full	RVD	99.984	0.996308
RGVC20258	Goat_Rumen-3__c465181	SRR12529379_1345841||full	RVD	99.997	1
RGVC20262	Goat_Rumen-3__c481058	SRR12529379_634918||full	RVD	99.998	1
RGVC20265	Goat_Rumen-3__c494661	SRR12529379_473487||full	RVD	99.91	0.958534
RGVC20266	Goat_Rumen-3__c507382	SRR12529379_1144700||full	RVD	99.941	1
RGVC20267	Goat_Rumen-3__c509297	SRR12529379_1225506||full	RVD	99.996	1
RGVC20270	Goat_Rumen-3__c526160	SRR12529379_1434386||full	RVD	100	0.76633
RGVC20271	Goat_Rumen-3__c52933	SRR12529376_754542||full	RVD	99.998	1
RGVC20275	Goat_Rumen-3__c540	SRR12529379_815087||full	RVD	99.998	1
RGVC20277	Goat_Rumen-3__c54833	SRR12529379_642701||full	RVD	99.996	1
RGVC20279	Goat_Rumen-3__c550035	SRR12529376_1286741||full	RVD	99.998	0.889457
RGVC20281	Goat_Rumen-3__c559649	SRR12529379_276837||full	RVD	99.989	1
RGVC20284	Goat_Rumen-3__c570417	SRR12529379_1429554||full	RVD	99.996	0.775346
RGVC20287	Goat_Rumen-3__c578254_1	SRR12529379_1040689||full_1	RVD	99.998	1
RGVC20288	Goat_Rumen-3__c578839_1	SRR12529379_1427561||full_1	RVD	100	1
RGVC20293	Goat_Rumen-3__c609842	SRR12529379_894150||full	RVD	99.98	1
RGVC20299	Goat_Rumen-3__c660583_1	SRR12529376_1216373||0_partial_1	RVD	99.979	1
RGVC20302	Goat_Rumen-3__c673635	SRR12529379_668234||full	RVD	99.995	0.873781
RGVC20305	Goat_Rumen-3__c692041	SRR12529379_721549||full	RVD	99.996	0.9991
RGVC20308	Goat_Rumen-3__c738829_1	SRR12529379_1010787||full_1	RVD	99.997	1
RGVC20310	Goat_Rumen-3__c741823	SRR12529379_1321949||full	RVD	99.995	0.999701
RGVC20311	Goat_Rumen-3__c750908	SRR12529379_181432||full	RVD	99.991	0.980127
RGVC20312	Goat_Rumen-3__c767801_1	SRR12529379_695376||full_1	RVD	99.948	0.941866
RGVC20315	Goat_Rumen-3__c785843	SRR12529379_660550||full	RVD	99.973	0.932076
RGVC20316	Goat_Rumen-3__c805009	SRR12529379_104619||full	RVD	99.995	0.996653
RGVC20319	Goat_Rumen-3__c82328	SRR12529379_283240||full	RVD	99.981	0.999514
RGVC20321	Goat_Rumen-3__c827407_1	SRR12529379_283592||full_1	RVD	99.994	0.913616
RGVC20323	Goat_Rumen-3__c834	SRR12529379_114945||full	RVD	99.972	0.998148
RGVC20325	Goat_Rumen-3__c868612_1	SRR12529379_1243760||full_1	RVD	99.994	0.926256
RGVC20326	Goat_Rumen-3__c871751	SRR12529379_1089836||full	RVD	99.917	1
RGVC20327	Goat_Rumen-3__c872004_1	SRR12529379_650509||full	RVD	99.994	1
RGVC20329	Goat_Rumen-3__c876168_1	SRR12529379_192646||full_1	RVD	99.997	0.84385
RGVC20330	Goat_Rumen-3__c877917	SRR12529379_400538||full	RVD	99.988	0.901639
RGVC20332	Goat_Rumen-3__c912953	SRR12529379_1364329||full	RVD	99.99	1
RGVC20334	Goat_Rumen-3__c918965_1	SRR12529379_54061||full_1	RVD	99.996	0.97091
RGVC20337	Goat_Rumen-3__c932765	SRR12529379_1294201||full	RVD	99.998	0.999708
RGVC20339	Goat_Rumen-4__c100029	SRR12529381_127393||0_partial_1	RVD	99.999	0.972325
RGVC20341	Goat_Rumen-4__c106798	SRR12529378_828423||full	RVD	99.868	0.940241
RGVC20346	Goat_Rumen-4__c1427	SRR12529378_76802||full	RVD	99.947	0.837891
RGVC20347	Goat_Rumen-4__c159979	SRR12529378_1355714||full	RVD	100	1
RGVC20348	Goat_Rumen-4__c1707	SRR12529378_1451463||full	RVD	99.969	0.807811
RGVC20350	Goat_Rumen-4__c194645_1	SRR12529377_711636||0_partial_1	RVD	99.969	0.802171
RGVC20353	Goat_Rumen-4__c228362	SRR12529378_1318139||full	RVD	99.987	1
RGVC20356	Goat_Rumen-4__c266374	SRR12529378_341854||full	RVD	99.992	0.907533
RGVC20359	Goat_Rumen-4__c3022	SRR12529376_497564||full	RVD	99.992	1
RGVC20360	Goat_Rumen-4__c3125	SRR12529378_128435||full	RVD	99.945	0.805674
RGVC20363	Goat_Rumen-4__c3381_1	SRR12529377_1502222||full_1	RVD	99.965	0.89376
RGVC20365	Goat_Rumen-4__c352846	SRR12529378_460081||full	RVD	99.991	1
RGVC20368	Goat_Rumen-4__c396963	SRR12529378_464848||full	RVD	99.968	0.883269
RGVC20370	Goat_Rumen-4__c423994	SRR12529378_13537||full	RVD	99.744	0.983084
RGVC20372	Goat_Rumen-4__c466254	SRR12529378_101056||full	RVD	99.993	1
RGVC20378	Goat_Rumen-4__c537183	SRR12529378_107159||full	RVD	99.995	1
RGVC20379	Goat_Rumen-4__c540473	SRR12529378_442665||full	RVD	99.974	0.971717
RGVC20380	Goat_Rumen-4__c541907	SRR12529378_624863||full	RVD	99.848	0.9627
RGVC20383	Goat_Rumen-4__c560993	SRR12529378_1623201||full	RVD	100	0.913886
RGVC20385	Goat_Rumen-4__c595475	SRR12529378_1541408||full	RVD	99.979	0.938883
RGVC20391	Goat_Rumen-4__c619615	SRR12529378_1299782||full	RVD	99.965	0.990702
RGVC20391	Goat_Rumen-4__c619615	IMGVR_UViG_3300031994_002589|3300031994|Ga0310691_10000688	IMG/VR v4	96.65	0.785994
RGVC20392	Goat_Rumen-4__c656	SRR12529378_1382349||full	RVD	99.969	0.978341
RGVC20393	Goat_Rumen-4__c669741	SRR12529378_1399203||full	RVD	100	1
RGVC20394	Goat_Rumen-4__c676178	SRR12529378_572460||full	RVD	99.965	0.822107
RGVC20395	Goat_Rumen-4__c690874	SRR12529378_519195||full	RVD	99.952	1
RGVC20397	Goat_Rumen-4__c698973_1	SRR12529378_795160||0_partial_1	RVD	99.998	1
RGVC20398	Goat_Rumen-4__c709615_1	SRR12529378_1451672||full_1	RVD	99.997	1
RGVC20401	Goat_Rumen-4__c786090	SRR12529378_71171||full	RVD	99.997	1
RGVC20403	Goat_Rumen-4__c826623	SRR12529378_469854||full	RVD	99.988	1
RGVC20406	Goat_Rumen-4__c846023	SRR12529378_1617189||full	RVD	99.92	0.998857
RGVC20407	Goat_Rumen-4__c879434	SRR12529378_417679||full	RVD	99.955	1
RGVC20409	Goat_Rumen-4__c927821	SRR12529378_169236||full_1	RVD	99.994	1
RGVC20410	Goat_Rumen-4__c941337	SRR12529378_1068484||full	RVD	99.956	1
RGVC20412	Goat_Rumen-4__c962233	SRR12529378_1291700||full	RVD	99.957	0.993969
RGVC20414	Goat_Rumen-4__c973907_1	SRR12529378_788581||full_1	RVD	99.993	0.913706
RGVC20417	Goat_Rumen-5__c1031294	SRR12529377_1062447||full	RVD	99.996	0.994172
RGVC20419	Goat_Rumen-5__c1037283_1	SRR12529377_787034||full_1	RVD	99.989	1
RGVC20420	Goat_Rumen-5__c1051055_1	SRR12529377_935305||full	RVD	100	1
RGVC20421	Goat_Rumen-5__c1062187_1	SRR12529377_1039373||0_partial_1	RVD	99.996	1
RGVC20422	Goat_Rumen-5__c107989	SRR12529380_777||full	RVD	97.046	0.830353
RGVC20423	Goat_Rumen-5__c1097457_1	SRR12529377_950450||full_1	RVD	100	0.868637
RGVC20424	Goat_Rumen-5__c1132092_1	SRR12529377_746302||full_1	RVD	99.997	1
RGVC20425	Goat_Rumen-5__c1137_1	SRR12529377_635707||full_1	RVD	100	0.865325
RGVC20426	Goat_Rumen-5__c1174	SRR12529377_304140||full	RVD	100	1
RGVC20427	Goat_Rumen-5__c122077_1	SRR12529377_75926||full_1	RVD	100	1
RGVC20430	Goat_Rumen-5__c149202_1	SRR12529377_375497||full_1	RVD	99.989	0.999853
RGVC20433	Goat_Rumen-5__c155069_1	SRR12529377_903140||full_1	RVD	99.996	0.907662
RGVC20435	Goat_Rumen-5__c161642	SRR12529377_1676778||full	RVD	99.988	0.944974
RGVC20436	Goat_Rumen-5__c165385	SRR12529377_1489467||full	RVD	99.991	1
RGVC20441	Goat_Rumen-5__c178247	SRR12529377_900268||full	RVD	99.982	1
RGVC20442	Goat_Rumen-5__c182413	SRR12529377_1614904||full	RVD	99.996	0.999346
RGVC20443	Goat_Rumen-5__c191009	SRR12529377_1724347||full	RVD	99.968	0.926873
RGVC20448	Goat_Rumen-5__c210340	SRR12529377_1758108||full	RVD	99.996	0.775218
RGVC20449	Goat_Rumen-5__c210621	SRR12529377_954081||full	RVD	99.955	0.89211
RGVC20451	Goat_Rumen-5__c219822_1	SRR12529377_1707830||full_1	RVD	99.993	1
RGVC20454	Goat_Rumen-5__c237066_1	SRR12529377_1241999||full_1	RVD	99.996	1
RGVC20458	Goat_Rumen-5__c250239	SRR12529377_432693||full	RVD	99.966	0.991051
RGVC20460	Goat_Rumen-5__c2577_1	SRR12529377_1279840||full_1	RVD	100	0.962286
RGVC20461	Goat_Rumen-5__c2684	SRR12529377_1605204||full	RVD	99.995	1
RGVC20467	Goat_Rumen-5__c2789	SRR12529381_656684||full	RVD	99.996	0.99999
RGVC20468	Goat_Rumen-5__c288164	SRR12529377_1252589||full	RVD	100	1
RGVC20470	Goat_Rumen-5__c290044	SRR12529377_1038470||full	RVD	99.982	0.999965
RGVC20471	Goat_Rumen-5__c290361	SRR12529377_1297886||full	RVD	99.974	1
RGVC20472	Goat_Rumen-5__c297859_1	SRR12529377_347590||full_1	RVD	99.998	1
RGVC20473	Goat_Rumen-5__c303521	SRR12529377_278151||full	RVD	99.981	1
RGVC20475	Goat_Rumen-5__c342	SRR12529377_1096791||full	RVD	100	0.856885
RGVC20480	Goat_Rumen-5__c367193	SRR12529377_1459227||full	RVD	100	0.993968
RGVC20483	Goat_Rumen-5__c388690_1	SRR12529377_1123906||full	RVD	99.994	1
RGVC20484	Goat_Rumen-5__c390612	SRR12529377_112185||full	RVD	100	1
RGVC20486	Goat_Rumen-5__c40_1	SRR12529378_489350||full_1	RVD	99.996	0.813237
RGVC20487	Goat_Rumen-5__c418942	SRR12529377_1765821||full	RVD	100	1
RGVC20488	Goat_Rumen-5__c431955	SRR12529377_1586233||full	RVD	99.994	0.96538
RGVC20489	Goat_Rumen-5__c439801	SRR12529377_1244870||full	RVD	99.927	0.995624
RGVC20490	Goat_Rumen-5__c441849	SRR12529377_1607452||full	RVD	99.994	1
RGVC20491	Goat_Rumen-5__c445644	SRR12529377_1336961||full_1	RVD	99.99	1
RGVC20494	Goat_Rumen-5__c470594_1	SRR12529377_1426678||0_partial_1	RVD	99.981	0.856474
RGVC20495	Goat_Rumen-5__c4735	SRR12529377_1829944||full	RVD	99.997	0.987973
RGVC20496	Goat_Rumen-5__c475913	SRR12529377_391975||full	RVD	100	1
RGVC20498	Goat_Rumen-5__c489815	SRR12529377_1216038||full	RVD	99.987	0.987824
RGVC20500	Goat_Rumen-5__c49665	SRR12529377_853343||full	RVD	99.991	1
RGVC20502	Goat_Rumen-5__c50417	SRR12529377_1627526||full	RVD	99.995	1
RGVC20503	Goat_Rumen-5__c515644	SRR12529377_650585||full	RVD	99.929	0.952777
RGVC20507	Goat_Rumen-5__c527196	SRR12529377_198813||full	RVD	100	1
RGVC20508	Goat_Rumen-5__c535535	SRR12529377_1757049||full	RVD	99.993	0.86168
RGVC20510	Goat_Rumen-5__c550267	SRR12529377_1382274||full	RVD	99.987	1
RGVC20512	Goat_Rumen-5__c570815	SRR12529379_1415656||full	RVD	99.893	1
RGVC20514	Goat_Rumen-5__c586602_1	SRR12529377_265198||full	RVD	99.994	1
RGVC20515	Goat_Rumen-5__c58930	SRR12529377_64016||full	RVD	99.976	0.892854
RGVC20517	Goat_Rumen-5__c606_1	SRR12529377_1845468||full	RVD	99.988	0.790825
RGVC20518	Goat_Rumen-5__c607238	SRR12529377_832879||full	RVD	99.946	0.982764
RGVC20520	Goat_Rumen-5__c61435	SRR12529377_511158||full	RVD	99.993	1
RGVC20521	Goat_Rumen-5__c617356	SRR12529377_755109||full	RVD	99.98	0.998605
RGVC20522	Goat_Rumen-5__c618155	SRR12529377_715772||full	RVD	99.991	1
RGVC20523	Goat_Rumen-5__c621436_1	SRR12529379_154436||full_1	RVD	100	1
RGVC20524	Goat_Rumen-5__c626402	SRR12529377_1858874||full	RVD	99.974	1
RGVC20525	Goat_Rumen-5__c630917	SRR12529377_989802||full	RVD	99.984	1
RGVC20528	Goat_Rumen-5__c651291	SRR12529377_283794||full	RVD	99.979	0.997436
RGVC20529	Goat_Rumen-5__c654984	SRR12529377_1755639||full	RVD	99.996	0.866858
RGVC20531	Goat_Rumen-5__c659916	SRR12529377_1607239||full	RVD	99.892	0.878983
RGVC20532	Goat_Rumen-5__c662260_1	SRR12529377_1747718||full	RVD	99.992	0.862705
RGVC20536	Goat_Rumen-5__c666821	SRR12529381_491766||full	RVD	99.991	0.99823
RGVC20538	Goat_Rumen-5__c668240	SRR12529377_1049191||full	RVD	99.975	0.988695
RGVC20540	Goat_Rumen-5__c670900	SRR12529377_1765169||full	RVD	100	0.753547
RGVC20541	Goat_Rumen-5__c674216	SRR12529377_1763626||full	RVD	100	0.935301
RGVC20544	Goat_Rumen-5__c682395	SRR12529377_1760237||full	RVD	99.929	0.902289
RGVC20545	Goat_Rumen-5__c684418	SRR12529377_1759718||full	RVD	99.991	0.973409
RGVC20547	Goat_Rumen-5__c686534	SRR12529377_1480533||full	RVD	99.997	1
RGVC20548	Goat_Rumen-5__c703767	SRR12529378_1118547||full_1	RVD	99.84	0.940217
RGVC20549	Goat_Rumen-5__c706657	SRR12529377_1590411||full	RVD	99.695	1
RGVC20550	Goat_Rumen-5__c712850	SRR12529377_1156202||full	RVD	99.947	1
RGVC20553	Goat_Rumen-5__c72152	SRR12529377_853872||full_1	RVD	100	1
RGVC20554	Goat_Rumen-5__c733335_1	SRR12529377_1408282||0_partial_1	RVD	100	1
RGVC20559	Goat_Rumen-5__c821475	SRR12529377_890676||full	RVD	99.936	0.959578
RGVC20561	Goat_Rumen-5__c837980	SRR12529377_256558||full	RVD	99.988	1
RGVC20563	Goat_Rumen-5__c880671	SRR12529380_871848||full	RVD	99.943	0.998744
RGVC20564	Goat_Rumen-5__c892831	SRR12529377_1144339||full	RVD	99.78	0.999085
RGVC20565	Goat_Rumen-5__c896582	SRR12529377_1468469||full_1	RVD	99.992	0.866157
RGVC20566	Goat_Rumen-5__c901910	SRR12529377_502785||full	RVD	99.993	0.959726
RGVC20567	Goat_Rumen-5__c902950_1	SRR12529377_1456503||0_partial_1	RVD	99.996	0.780434
RGVC20569	Goat_Rumen-5__c912354	SRR12529377_96829||full	RVD	99.963	0.998581
RGVC20570	Goat_Rumen-5__c912958	SRR12529377_720222||full	RVD	99.856	0.84047
RGVC20572	Goat_Rumen-5__c941431	SRR12529377_291529||full	RVD	99.893	1
RGVC20573	Goat_Rumen-5__c946921_1	SRR12529378_716471||0_partial_1	RVD	100	0.869693
RGVC20574	Goat_Rumen-5__c949808_1	SRR12529377_1752070||0_partial_1	RVD	100	0.999948
RGVC20575	Goat_Rumen-5__c963421_1	SRR12529377_498623||0_partial_1	RVD	99.998	0.956572
RGVC20575	Goat_Rumen-5__c963421_1	IMGVR_UViG_2684622814_000001|2684622814|2684649326|59073-95507	IMG/VR v4	99.98	0.855278
RGVC20577	Goat_Rumen-5__c967194	SRR12529377_1352454||full	RVD	99.655	1
RGVC20579	Goat_Rumen-5__c977231	SRR12529377_1714641||full	RVD	99.979	0.995404
RGVC20580	Goat_Rumen-5__c982899	SRR12529377_1320052||full	RVD	99.994	1
RGVC20582	Goat_Rumen-5__c997882	SRR12529377_1660075||full	RVD	99.996	1
RGVC20583	Goat_Rumen-6__c102272_1	SRR12529376_1384093||full_1	RVD	100	1
RGVC20584	Goat_Rumen-6__c10246_1	SRR12529376_828738||0_partial	RVD	99.91	0.997616
RGVC20589	Goat_Rumen-6__c1137	SRR12529379_412908||full	RVD	99.983	1
RGVC20590	Goat_Rumen-6__c115254	SRR12529376_808720||full	RVD	99.997	1
RGVC20591	Goat_Rumen-6__c1181	SRR12529379_126789||full	RVD	99.999	1
RGVC20592	Goat_Rumen-6__c1218	SRR12529376_196959||full	RVD	99.987	0.956938
RGVC20593	Goat_Rumen-6__c133688	SRR12529376_198405||full	RVD	99.983	0.994554
RGVC20594	Goat_Rumen-6__c135766_1	SRR12529376_372814||full_1	RVD	99.961	0.855635
RGVC20596	Goat_Rumen-6__c151692_1	SRR12529376_756484||full_1	RVD	99.967	0.987256
RGVC20597	Goat_Rumen-6__c1551_1	SRR12529376_438551||0_partial_1	RVD	100	0.972062
RGVC20601	Goat_Rumen-6__c1593	SRR12529376_218895||full	RVD	99.991	0.999261
RGVC20602	Goat_Rumen-6__c162259	SRR12529376_787066||full	RVD	100	1
RGVC20606	Goat_Rumen-6__c1739	SRR12529380_1401623||full	RVD	99.982	1
RGVC20610	Goat_Rumen-6__c19011	SRR12529376_180846||full	RVD	100	1
RGVC20612	Goat_Rumen-6__c203589_1	SRR12529376_812219||full_1	RVD	99.997	0.899069
RGVC20617	Goat_Rumen-6__c2274	SRR12529376_173702||full	RVD	99.993	1
RGVC20621	Goat_Rumen-6__c250785_1	SRR12529376_779385||full_1	RVD	99.996	0.911551
RGVC20624	Goat_Rumen-6__c258785	SRR12529376_1237623||full	RVD	99.971	0.992479
RGVC20625	Goat_Rumen-6__c272115_1	SRR12529376_782756||full_1	RVD	99.997	0.900383
RGVC20627	Goat_Rumen-6__c298151	SRR12529376_1430846||full	RVD	99.996	1
RGVC20629	Goat_Rumen-6__c333546	SRR12529376_23896||full	RVD	99.889	0.985878
RGVC20631	Goat_Rumen-6__c346020	SRR12529376_57499||full	RVD	99.98	1
RGVC20632	Goat_Rumen-6__c363843	SRR12529376_1150540||full	RVD	100	1
RGVC20633	Goat_Rumen-6__c365868	SRR12529376_744772||full	RVD	100	1
RGVC20634	Goat_Rumen-6__c380334	SRR12529376_1296789||full	RVD	100	0.799758
RGVC20635	Goat_Rumen-6__c387420	SRR12529376_1150654||full	RVD	99.959	1
RGVC20637	Goat_Rumen-6__c457101	SRR12529376_275901||full	RVD	99.996	1
RGVC20639	Goat_Rumen-6__c481532	SRR12529376_1285198||full	RVD	99.966	0.772567
RGVC20641	Goat_Rumen-6__c490657	SRR12529376_10920||full	RVD	99.978	0.945418
RGVC20642	Goat_Rumen-6__c500988	SRR12529376_1297353||full	RVD	100	0.827428
RGVC20643	Goat_Rumen-6__c502125	SRR12529376_378669||full	RVD	99.961	0.912053
RGVC20644	Goat_Rumen-6__c504018_1	SRR12529376_849251||full	RVD	99.998	0.99679
RGVC20645	Goat_Rumen-6__c505	SRR12529376_284148||full	RVD	99.997	0.837671
RGVC20649	Goat_Rumen-6__c551170	SRR12529376_795831||full	RVD	99.979	1
RGVC20652	Goat_Rumen-6__c564907	SRR12529376_729315||full	RVD	99.989	1
RGVC20653	Goat_Rumen-6__c568942_1	SRR12529376_699115||full	RVD	99.79	0.803061
RGVC20654	Goat_Rumen-6__c601413	SRR12529376_968729||full	RVD	99.98	1
RGVC20655	Goat_Rumen-6__c642474	SRR12529376_1196902||full	RVD	99.996	0.997661
RGVC20657	Goat_Rumen-6__c656977	SRR12529376_15126||full	RVD	100	0.807958
RGVC20658	Goat_Rumen-6__c659908	SRR12529376_186631||full	RVD	99.923	1
RGVC20659	Goat_Rumen-6__c668745	SRR12529376_441892||full	RVD	99.989	0.999849
RGVC20661	Goat_Rumen-6__c690868	SRR12529376_1142724||full	RVD	99.987	0.978318
RGVC20662	Goat_Rumen-6__c693588	SRR12529376_1096887||full	RVD	99.789	1
RGVC20663	Goat_Rumen-6__c697	SRR12529379_1185611||full_1	RVD	99.998	0.828047
RGVC20665	Goat_Rumen-6__c720412	SRR12529376_1221145||full_1	RVD	100	0.793629
RGVC20667	Goat_Rumen-6__c750091	SRR12529379_1172267||full	RVD	99.624	0.990741
RGVC20669	Goat_Rumen-6__c757077_1	SRR12529376_151402||full_1	RVD	99.994	0.997442
RGVC20670	Goat_Rumen-6__c76017_1	SRR12529376_623405||0_partial_1	RVD	99.996	0.942474
RGVC20672	Goat_Rumen-6__c765798	SRR12529376_576851||full	RVD	100	1
RGVC20675	Goat_Rumen-6__c786515_1	SRR12529378_900492||full_1	RVD	99.961	0.888863
RGVC20676	Goat_Rumen-6__c792364	SRR12529376_1014015||full	RVD	99.994	0.824773
RGVC20677	Goat_Rumen-6__c81618	SRR12529376_546263||full	RVD	99.992	1
RGVC20678	Goat_Rumen-6__c820825	SRR12529376_46736||full	RVD	99.956	1
RGVC20683	Goat_Rumen-6__c844232	SRR12529376_308308||full	RVD	99.995	1
RGVC20685	Goat_Rumen-6__c845_1	SRR12529376_161686||full	RVD	100	0.906974
RGVC20687	Goat_Rumen-6__c850703	SRR12529376_547536||full	RVD	99.996	1
RGVC20689	Goat_Rumen-6__c85485	SRR12529376_1046517||full	RVD	99.98	0.996031
RGVC20690	Goat_Rumen-6__c872	SRR12529376_1134849||full	RVD	99.975	0.997039
RGVC20692	Goat_Rumen-6__c916	SRR12529376_843436||full	RVD	99.998	0.844145
RGVC20696	Goat_Rumen-6__c965	SRR12529376_127524||full	RVD	100	0.84465
RGVC20697	Goat_Rumen-6__c98453_1	SRR12529376_388033||full_1	RVD	99.959	1
RGVC20706	Roe_deer_Abomasum-1__c1319_1	SRR12529325_849123||full_1	RVD	100	1
RGVC20708	Roe_deer_Abomasum-1__c136269	ERR3211453_1025031||full	RVD	95.953	0.971186
RGVC20723	Roe_deer_Abomasum-1__c2551	SRR12529325_411786||full	RVD	100	0.91153
RGVC20726	Roe_deer_Abomasum-1__c266175	SRR12529325_231202||full	RVD	99.981	0.768697
RGVC20727	Roe_deer_Abomasum-1__c276290	SRR12529325_295588||full	RVD	99.905	1
RGVC20728	Roe_deer_Abomasum-1__c277207	SRR12529325_111722||full_1	RVD	99.957	0.837375
RGVC20731	Roe_deer_Abomasum-1__c305_1	SRR12529325_325315||full_1	RVD	100	1
RGVC20735	Roe_deer_Abomasum-1__c56559	SRR12529325_123933||full	RVD	100	0.977093
RGVC20741	Roe_deer_Abomasum-1__c64330	SRR12529325_30441||full_1	RVD	99.994	0.873083
RGVC20746	Roe_deer_Abomasum-2__c120436	SRR12529324_452182||full	RVD	100	0.880692
RGVC20748	Roe_deer_Abomasum-2__c1312	ERR3201384_663649||0_partial_1	RVD	95.318	0.948279
RGVC20751	Roe_deer_Abomasum-2__c165_1	SRR12529324_183700||full	RVD	99.999	1
RGVC20752	Roe_deer_Abomasum-2__c211_1	SRR12529324_776045||0_partial_1	RVD	99.957	0.92579
RGVC20755	Roe_deer_Abomasum-2__c427	SRR12529324_418980||full	RVD	99.877	0.926699
RGVC20758	Roe_deer_Abomasum-2__c455_1	ERR4297105_268484||full	RVD	94.217	0.940576
RGVC20759	Roe_deer_Abomasum-2__c57634	SRR12529324_838825||full	RVD	99.975	0.834648
RGVC20760	Roe_deer_Abomasum-2__c652	SRR12529324_404082||full	RVD	99.973	0.904546
RGVC20761	Roe_deer_Abomasum-2__c75735	SRR12529321_500513||full	RVD	99.966	0.814479
RGVC20766	Roe_deer_Abomasum-3__c1182	SRR12529323_172111||full_1	RVD	99.973	0.829421
RGVC20767	Roe_deer_Abomasum-3__c127958	SRR12529323_147795||full	RVD	99.986	0.98666
RGVC20769	Roe_deer_Abomasum-3__c21878_1	SRR12529323_229769||full	RVD	100	0.766077
RGVC20770	Roe_deer_Abomasum-3__c295_1	SRR12529323_45301||0_partial_1	RVD	100	1
RGVC20774	Roe_deer_Abomasum-3__c504	SRR12529323_120653||full	RVD	100	0.998611
RGVC20775	Roe_deer_Abomasum-3__c51113	SRR12529323_380594||full	RVD	99.98	0.828061
RGVC20780	Roe_deer_Abomasum-3__c575	SRR12529323_102668||full	RVD	100	0.880414
RGVC20783	Roe_deer_Abomasum-3__c664_1	SRR12529323_222926||0_partial_1	RVD	99.994	1
RGVC20784	Roe_deer_Abomasum-3__c717	SRR12529323_381817||full	RVD	100	0.892534
RGVC20789	Roe_deer_Abomasum-4__c116903	SRR12529322_235544||full	RVD	99.983	0.86896
RGVC20800	Roe_deer_Abomasum-4__c1756	SRR12529322_408046||full	RVD	99.978	0.796656
RGVC20802	Roe_deer_Abomasum-4__c1820_1	SRR12529322_247655||full_1	RVD	100	0.972927
RGVC20805	Roe_deer_Abomasum-4__c1943	SRR12529322_406696||full	RVD	99.997	0.796732
RGVC20809	Roe_deer_Abomasum-4__c36009	SRR12529322_150858||full	RVD	99.989	0.992233
RGVC20819	Roe_deer_Abomasum-4__c772_1	SRR12529322_43024||0_partial	RVD	100	0.806463
RGVC20825	Roe_deer_Abomasum-5__c1217_1	SRR12529321_356130||full	RVD	100	0.776028
RGVC20830	Roe_deer_Abomasum-5__c148635	SRR12529321_263971||full	RVD	99.797	0.952326
RGVC20838	Roe_deer_Abomasum-5__c2150	SRR12529321_931181||full	RVD	99.987	0.982593
RGVC20839	Roe_deer_Abomasum-5__c2196	SRR12529321_322854||full	RVD	100	1
RGVC20841	Roe_deer_Abomasum-5__c2284_1	SRR12529321_713576||full_1	RVD	100	0.891125
RGVC20847	Roe_deer_Abomasum-5__c654_2	SRR12529321_668003||full_1	RVD	99.983	0.848087
RGVC21029	Roe_deer_Cecum-1__c537237	SRR12529325_326785||full	RVD	99.887	0.989045
RGVC21138	Roe_deer_Cecum-2__c217864	IMGVR_UViG_3300029705_000470|3300029705|Ga0224414_10012003	IMG/VR v4	96.33	0.933745
RGVC21138	Roe_deer_Cecum-2__c217864	uvig_309601	GPD	91.715	0.837197
RGVC21205	Roe_deer_Cecum-2__c464763	SRR12529321_702747||full	RVD	99.956	0.779081
RGVC21344	Roe_deer_Cecum-3__c324460	SRR12529323_294013||full	RVD	99.94	0.99585
RGVC21405	Roe_deer_Cecum-3__c83936	SRR12529323_228173||full_1	RVD	99.951	0.801569
RGVC21434	Roe_deer_Cecum-4__c150036	uvig_183616	GPD	97.061	0.775631
RGVC21573	Roe_deer_Cecum-5__c164520_1	SRR12529321_88742||full_1	RVD	99.987	1
RGVC21680	Roe_deer_Cecum-5__c482816	IMGVR_UViG_3300029305_001374|3300029305|Ga0307249_10036177	IMG/VR v4	97.07	0.772101
RGVC21853	Roe_deer_Colon-2__c330764	SRR12529324_295810||full	RVD	99.958	0.893114
RGVC22151	Roe_deer_Colon-5__c90029	SRR12529321_422845||full	RVD	100	0.996792
RGVC22156	Roe_deer_Duodenum-1__c1027_1	SRR12529325_102040||full_1	RVD	100	0.871402
RGVC22163	Roe_deer_Duodenum-1__c1663	SRR12529325_265868||full_1	RVD	99.996	0.958139
RGVC22164	Roe_deer_Duodenum-1__c1667	SRR12529325_152025||full	RVD	99.972	0.883734
RGVC22165	Roe_deer_Duodenum-1__c1762	SRR12529321_356130||full	RVD	100	0.90574
RGVC22166	Roe_deer_Duodenum-1__c202383	SRR12529321_245936||full	RVD	99.984	0.980409
RGVC22167	Roe_deer_Duodenum-1__c206_1	SRR12529325_47023||full	RVD	100	1
RGVC22179	Roe_deer_Duodenum-1__c764	SRR12529325_78182||full	RVD	99.814	1
RGVC22191	Roe_deer_Duodenum-2__c1553	SRR12529324_685984||full	RVD	99.817	0.780533
RGVC22192	Roe_deer_Duodenum-2__c1658	SRR12529324_730659||full	RVD	99.945	0.981224
RGVC22207	Roe_deer_Duodenum-2__c297232_1	SRR12529324_311662||full_1	RVD	99.987	1
RGVC22226	Roe_deer_Ileum-4__c102	SRR12529322_103438||full	RVD	99.955	0.996626
RGVC22227	Roe_deer_Ileum-4__c114	SRR12529322_125305||full	RVD	99.994	0.984145
RGVC22228	Roe_deer_Ileum-4__c11973_1	SRR12529322_200385||full	RVD	99.995	0.988452
RGVC22261	Roe_deer_Jejunum-1__c148527	SRR12529324_87453||full	RVD	98.445	0.775941
RGVC22285	Roe_deer_Jejunum-1__c189060	ERR3224590_700861||full_1	RVD	91.214	0.999846
RGVC22285	Roe_deer_Jejunum-1__c189060	IMGVR_UViG_3300021256_000177|3300021256|Ga0223826_10001434	IMG/VR v4	95.5	0.983092
RGVC22306	Roe_deer_Jejunum-1__c265_1	SRR12529378_1299782||full	RVD	96.021	0.756223
RGVC22306	Roe_deer_Jejunum-1__c265_1	IMGVR_UViG_3300028805_004744|3300028805|Ga0247608_10000356|17550-77990	IMG/VR v4	96.42	0.849694
RGVC22310	Roe_deer_Jejunum-1__c293	SRR12529325_129048||full	RVD	99.996	0.821286
RGVC22317	Roe_deer_Jejunum-1__c318	SRR12529325_427493||full	RVD	99.941	0.918965
RGVC22324	Roe_deer_Jejunum-1__c353	SRR12529325_295110||full	RVD	99.995	0.766598
RGVC22326	Roe_deer_Jejunum-1__c357	SRR12529325_595032||full	RVD	100	0.987905
RGVC22332	Roe_deer_Jejunum-1__c37	SRR11485375_59667||full	RVD	93.759	0.856632
RGVC22343	Roe_deer_Jejunum-1__c390	SRR12529325_141831||full	RVD	99.964	0.956054
RGVC22354	Roe_deer_Jejunum-1__c417_1	SRR12529325_418043||full	RVD	99.929	0.972363
RGVC22361	Roe_deer_Jejunum-1__c456	ERR3224601_314415||full	RVD	96.383	0.951728
RGVC22372	Roe_deer_Jejunum-1__c502	SRR12529325_680543||full	RVD	99.986	0.887434
RGVC22384	Roe_deer_Jejunum-1__c55304	SRR12529325_656259||full	RVD	100	0.989665
RGVC22411	Roe_deer_Jejunum-1__c695	SRR12529325_761400||full	RVD	99.97	0.850018
RGVC22439	Roe_deer_Jejunum-2__c103	SRR12529324_1139908||full	RVD	99.984	1
RGVC22440	Roe_deer_Jejunum-2__c109	SRR12529324_2572||full	RVD	99.986	0.982905
RGVC22441	Roe_deer_Jejunum-2__c109237	SRR12529324_65186||full	RVD	99.966	0.883812
RGVC22445	Roe_deer_Jejunum-2__c117634	ERR3275137_260871||full	RVD	92.375	1
RGVC22449	Roe_deer_Jejunum-2__c134491	SRR873595_1601455||full	RVD	94.148	0.999473
RGVC22449	Roe_deer_Jejunum-2__c134491	IMGVR_UViG_3300021400_000118|3300021400|Ga0224422_12153542	IMG/VR v4	93.72	0.83942
RGVC22456	Roe_deer_Jejunum-2__c156_1	ERR3224610_201871||full	RVD	94.993	1
RGVC22458	Roe_deer_Jejunum-2__c163682	SRR12529324_917181||full	RVD	99.972	1
RGVC22464	Roe_deer_Jejunum-2__c179587	SRR12529324_877374||full	RVD	99.99	0.989199
RGVC22472	Roe_deer_Jejunum-2__c297	EarthsVirome_12596	PIGEON	97.723	0.957456
RGVC22472	Roe_deer_Jejunum-2__c297	IMGVR_UViG_3300014057_000004|3300014057|Ga0120384_1000609	IMG/VR v4	97.86	0.957313
RGVC22490	Roe_deer_Jejunum-2__c441	SRR12529324_854336||full	RVD	99.941	0.76786
RGVC22491	Roe_deer_Jejunum-2__c443	SRR12529324_783028||full	RVD	99.996	0.784016
RGVC22497	Roe_deer_Jejunum-2__c49298_1	SRR12529324_100154||full_1	RVD	99.986	0.968209
RGVC22498	Roe_deer_Jejunum-2__c51195	SRR12529324_877638||full	RVD	99.973	0.947505
RGVC22499	Roe_deer_Jejunum-2__c527	SRR12529324_403905||full	RVD	99.994	0.883929
RGVC22511	Roe_deer_Jejunum-2__c70278	SRR6197820_323061||full	RVD	96.488	0.799361
RGVC22534	Roe_deer_Jejunum-3__c1104	SRR12529323_256827||full	RVD	99.989	1
RGVC22537	Roe_deer_Jejunum-3__c1195	SRR12529323_502194||full	RVD	99.994	0.942529
RGVC22545	Roe_deer_Jejunum-3__c1404	SRR12529321_543572||full	RVD	99.981	0.999839
RGVC22583	Roe_deer_Jejunum-3__c52_1	SRR12529323_228173||full_1	RVD	99.945	0.770753
RGVC22586	Roe_deer_Jejunum-3__c631	SRR12529321_798436||full	RVD	99.977	0.99901
RGVC22598	Roe_deer_Jejunum-3__c87058	SRR12529324_1139908||full	RVD	93.231	1
RGVC22600	Roe_deer_Jejunum-3__c899	SRR12529323_470193||full	RVD	100	0.896846
RGVC22603	Roe_deer_Jejunum-3__c955	SRR12529323_150870||full	RVD	99.971	0.782872
RGVC22604	Roe_deer_Jejunum-3__c969	SRR12529323_355119||full	RVD	99.999	0.99933
RGVC22608	Roe_deer_Jejunum-4__c146	SRR12529322_88371||full	RVD	100	0.966514
RGVC22614	Roe_deer_Omasum-1__c150	SRR12529325_417143||full	RVD	100	0.934692
RGVC22615	Roe_deer_Omasum-1__c1635_1	SRR12529325_817809||full	RVD	100	0.945487
RGVC22617	Roe_deer_Omasum-1__c1811	SRR12529325_591260||full	RVD	99.991	0.987334
RGVC22628	Roe_deer_Omasum-1__c459_1	SRR12529325_101304||0_partial_1	RVD	100	1
RGVC22629	Roe_deer_Omasum-1__c54116	SRR12529325_417447||full	RVD	99.729	0.803774
RGVC22633	Roe_deer_Omasum-2__c1032	SRR12529324_431671||full	RVD	99.998	0.816047
RGVC22635	Roe_deer_Omasum-2__c1157	SRR12529324_1017342||full	RVD	100	1
RGVC22637	Roe_deer_Omasum-2__c1302	SRR12529324_512559||full	RVD	99.784	0.768982
RGVC22639	Roe_deer_Omasum-2__c1414_1	SRR12529324_675846||0_partial	RVD	99.989	0.999962
RGVC22642	Roe_deer_Omasum-2__c154162	SRR12529324_1002523||full	RVD	99.912	0.896058
RGVC22643	Roe_deer_Omasum-2__c1620	SRR12529324_1032851||full	RVD	99.963	0.851859
RGVC22647	Roe_deer_Omasum-2__c174193	SRR12529324_163353||full	RVD	99.918	0.770249
RGVC22651	Roe_deer_Omasum-2__c1818_1	SRR12529321_352680||full_1	RVD	99.995	0.991289
RGVC22652	Roe_deer_Omasum-2__c1846	IMGVR_UViG_3300014826_000013|3300014826|Ga0120386_1000312	IMG/VR v4	97.81	0.784408
RGVC22655	Roe_deer_Omasum-2__c188739	SRR12529322_262474||full_1	RVD	99.978	0.867853
RGVC22657	Roe_deer_Omasum-2__c193637	SRR12529324_54078||full	RVD	99.982	1
RGVC22667	Roe_deer_Omasum-2__c227_1	SRR12529324_375554||full_1	RVD	99.994	0.989654
RGVC22669	Roe_deer_Omasum-2__c2393	SRR12529324_661622||full	RVD	100	0.835021
RGVC22671	Roe_deer_Omasum-2__c244959	SRR12529324_872311||full_1	RVD	99.966	0.915457
RGVC22677	Roe_deer_Omasum-2__c261333	SRR12529324_919853||full	RVD	99.954	0.988376
RGVC22678	Roe_deer_Omasum-2__c2671_1	SRR12529324_597021||full_1	RVD	100	1
RGVC22680	Roe_deer_Omasum-2__c2771	SRR12529324_800222||full	RVD	99.986	0.811414
RGVC22682	Roe_deer_Omasum-2__c2783	SRR12529324_209643||full	RVD	99.992	1
RGVC22691	Roe_deer_Omasum-2__c3167_1	SRR12529324_448011||full_1	RVD	99.994	0.973115
RGVC22695	Roe_deer_Omasum-2__c339_1	SRR12529322_384977||full_1	RVD	99.942	0.937613
RGVC22696	Roe_deer_Omasum-2__c40796	SRR12529324_224067||full_1	RVD	99.99	1
RGVC22700	Roe_deer_Omasum-2__c538_1	SRR12529324_746953||full_1	RVD	100	0.986745
RGVC22701	Roe_deer_Omasum-2__c604	SRR12529324_830359||full	RVD	99.984	1
RGVC22705	Roe_deer_Omasum-2__c726_1	SRR12529324_133591||full_1	RVD	99.984	1
RGVC22706	Roe_deer_Omasum-2__c80472	SRR12529324_287569||full	RVD	99.837	0.928815
RGVC22708	Roe_deer_Omasum-2__c926	SRR12529324_847328||full	RVD	99.998	1
RGVC22713	Roe_deer_Omasum-3__c10850	SRR12529323_71423||0_partial_1	RVD	99.996	0.999962
RGVC22715	Roe_deer_Omasum-3__c113431_1	SRR12529323_145332||full_1	RVD	100	1
RGVC22724	Roe_deer_Omasum-3__c1287	SRR12529323_19501||full	RVD	99.988	1
RGVC22731	Roe_deer_Omasum-3__c152436	SRR12529323_27944||full	RVD	100	0.868628
RGVC22738	Roe_deer_Omasum-3__c168897	SRR12529321_675942||full_1	RVD	98.884	0.92527
RGVC22744	Roe_deer_Omasum-3__c188162_1	SRR12529323_336693||0_partial_1	RVD	100	0.996926
RGVC22745	Roe_deer_Omasum-3__c1884	SRR12529323_111246||full	RVD	100	0.999472
RGVC22747	Roe_deer_Omasum-3__c20959_1	SRR12529323_60796||full	RVD	99.979	0.993411
RGVC22753	Roe_deer_Omasum-3__c2330	SRR12529323_244785||full	RVD	99.967	1
RGVC22755	Roe_deer_Omasum-3__c2523_1	SRR12529321_489449||full_1	RVD	99.985	1
RGVC22757	Roe_deer_Omasum-3__c31_1	SRR12529323_34759||full_1	RVD	100	1
RGVC22771	Roe_deer_Omasum-3__c916_1	SRR12529323_33275||full	RVD	99.977	0.964498
RGVC22775	Roe_deer_Omasum-4__c103524	SRR12529322_72705||full	RVD	99.996	0.992683
RGVC22777	Roe_deer_Omasum-4__c113967_1	SRR12529322_278385||full	RVD	100	0.949894
RGVC22780	Roe_deer_Omasum-4__c123409	SRR12529322_257176||full	RVD	99.949	0.98703
RGVC22782	Roe_deer_Omasum-4__c154123	SRR12529322_62635||0_partial	RVD	99.954	0.972958
RGVC22783	Roe_deer_Omasum-4__c157457_1	SRR12529322_173115||full_1	RVD	100	1
RGVC22788	Roe_deer_Omasum-4__c1809	SRR12529322_75167||full	RVD	99.968	0.837569
RGVC22792	Roe_deer_Omasum-4__c196768	SRR12529322_257468||full	RVD	100	0.999574
RGVC22800	Roe_deer_Omasum-4__c308	SRR12529322_263780||full	RVD	99.99	0.973312
RGVC22803	Roe_deer_Omasum-4__c3628_1	SRR12529322_16163||full_1	RVD	100	1
RGVC22804	Roe_deer_Omasum-4__c3648	SRR873598_1825643||full	RVD	98.151	0.787235
RGVC22804	Roe_deer_Omasum-4__c3648	IMGVR_UViG_3300021254_000009|3300021254|Ga0223824_10000936	IMG/VR v4	98.11	0.835359
RGVC22809	Roe_deer_Omasum-4__c4388	SRR12529322_423034||full	RVD	99.998	1
RGVC22817	Roe_deer_Omasum-4__c5290	SRR12529322_265099||full	RVD	100	0.875987
RGVC22829	Roe_deer_Omasum-5__c145949	SRR12529321_805797||full	RVD	99.97	0.942783
RGVC22832	Roe_deer_Omasum-5__c1748_1	SRR12529321_378927||full_1	RVD	99.993	0.879024
RGVC22840	Roe_deer_Omasum-5__c218266	SRR12529321_579031||full	RVD	100	1
RGVC22841	Roe_deer_Omasum-5__c222716	SRR12529321_296223||full_1	RVD	100	0.928418
RGVC22847	Roe_deer_Omasum-5__c2544	SRR12529321_161902||full	RVD	99.998	0.904715
RGVC22851	Roe_deer_Omasum-5__c2769	SRR12529321_335911||full	RVD	99.976	1
RGVC22857	Roe_deer_Omasum-5__c3352_1	SRR12529321_424122||0_partial_1	RVD	100	0.759357
RGVC22862	Roe_deer_Omasum-5__c3594	SRR12529321_107814||full	RVD	99.86	0.90961
RGVC22866	Roe_deer_Omasum-5__c3830_1	SRR12529321_820605||full	RVD	100	0.980439
RGVC22867	Roe_deer_Omasum-5__c488	SRR12529321_817821||full	RVD	99.991	0.979871
RGVC22868	Roe_deer_Omasum-5__c53_1	SRR12529321_202784||full_1	RVD	99.996	1
RGVC22871	Roe_deer_Omasum-5__c573	SRR12529321_575800||full	RVD	99.981	0.940375
RGVC22872	Roe_deer_Omasum-5__c632	SRR12529321_355219||0_partial	RVD	99.991	0.975747
RGVC22874	Roe_deer_Omasum-5__c817	SRR12529321_334342||full	RVD	99.972	0.999074
RGVC22883	Roe_deer_Rectum-1__c1171_1	IMGVR_UViG_3300029736_000295|3300029736|Ga0245186_100020|161148-210201	IMG/VR v4	96	0.775538
RGVC22958	Roe_deer_Rectum-1__c533211_1	SRR12529325_406517||full	RVD	99.99	0.855912
RGVC22973	Roe_deer_Rectum-1__c691154	IMGVR_UViG_3300029305_005437|3300029305|Ga0307249_10020935	IMG/VR v4	98.17	1
RGVC22994	Roe_deer_Rectum-2__c109622_1	IMGVR_UViG_3300024269_000233|3300024269|Ga0257076_10005368	IMG/VR v4	97.85	0.765675
RGVC23012	Roe_deer_Rectum-2__c1495	SRR12529324_1029251||full	RVD	99.995	0.996621
RGVC23120	Roe_deer_Rectum-2__c790	SRR12529324_553068||full	RVD	99.976	0.882362
RGVC23150	Roe_deer_Rectum-3__c167	SRR12529323_486576||full	RVD	99.994	0.991708
RGVC23522	Roe_deer_Reticulum-1__c129206	SRR12529325_34315||full	RVD	99.992	0.996846
RGVC23534	Roe_deer_Reticulum-1__c377	SRR12529323_114110||full	RVD	99.942	0.891172
RGVC23537	Roe_deer_Reticulum-1__c73729	SRR12529325_246665||full	RVD	99.996	0.972663
RGVC23540	Roe_deer_Reticulum-2__c120239	FH88563_77031||full	RVD	98.274	0.903503
RGVC23546	Roe_deer_Reticulum-2__c1427_1	SRR12529324_1149386||full_1	RVD	100	0.863334
RGVC23557	Roe_deer_Reticulum-2__c1643	SRR12529324_607927||full	RVD	99.956	0.847291
RGVC23560	Roe_deer_Reticulum-2__c168_1	SRR12529324_898604||full	RVD	100	0.999124
RGVC23565	Roe_deer_Reticulum-2__c180180	SRR12529324_232707||full	RVD	99.981	0.999981
RGVC23566	Roe_deer_Reticulum-2__c1897	SRR12529324_323048||full	RVD	99.907	0.85069
RGVC23568	Roe_deer_Reticulum-2__c2128	SRR12529324_305254||full	RVD	99.995	0.778914
RGVC23569	Roe_deer_Reticulum-2__c2136	SRR12529324_39634||full	RVD	99.972	0.776223
RGVC23575	Roe_deer_Reticulum-2__c2501	SRR12529324_838825||full	RVD	100	1
RGVC23577	Roe_deer_Reticulum-2__c255	SRR12529324_402099||full	RVD	100	0.853365
RGVC23583	Roe_deer_Reticulum-2__c278691	SRR12529324_1149369||full	RVD	99.996	0.791309
RGVC23584	Roe_deer_Reticulum-2__c279285_1	uvig_69116	GPD	94.286	0.774774
RGVC23585	Roe_deer_Reticulum-2__c422	SRR12529324_904652||full	RVD	99.999	0.896787
RGVC23586	Roe_deer_Reticulum-2__c4300	SRR12529324_706287||full	RVD	99.934	0.963466
RGVC23591	Roe_deer_Reticulum-2__c78713	SRR12529324_96079||full	RVD	99.989	0.807696
RGVC23594	Roe_deer_Reticulum-3__c1225	SRR12529323_219589||full	RVD	100	0.920116
RGVC23600	Roe_deer_Reticulum-3__c157540_1	SRR12529323_430836||full_1	RVD	100	0.823598
RGVC23601	Roe_deer_Reticulum-3__c1629	SRR12529323_3159||full	RVD	100	0.888868
RGVC23610	Roe_deer_Reticulum-3__c1891_1	SRR12529323_19660||full_1	RVD	99.976	0.995465
RGVC23611	Roe_deer_Reticulum-3__c192	SRR12529323_130497||full	RVD	99.978	0.876477
RGVC23614	Roe_deer_Reticulum-3__c201545	SRR12529323_514849||full	RVD	99.991	0.999132
RGVC23615	Roe_deer_Reticulum-3__c202363	SRR12529323_252103||full	RVD	99.982	0.998512
RGVC23616	Roe_deer_Reticulum-3__c202484_1	SRR12529323_149721||full_1	RVD	99.988	0.95153
RGVC23618	Roe_deer_Reticulum-3__c216_1	SRR12529323_302428||full_1	RVD	99.959	0.833802
RGVC23619	Roe_deer_Reticulum-3__c2181	SRR12529323_270963||full	RVD	99.999	1
RGVC23621	Roe_deer_Reticulum-3__c2305_1	SRR12529321_132585||full	RVD	99.992	0.997026
RGVC23625	Roe_deer_Reticulum-3__c2475_1	SRR12529323_88009||full_1	RVD	99.992	1
RGVC23626	Roe_deer_Reticulum-3__c249411	SRR12529323_103066||full	RVD	99.966	0.913619
RGVC23627	Roe_deer_Reticulum-3__c31544_1	SRR12529323_220318||full_1	RVD	99.997	1
RGVC23631	Roe_deer_Reticulum-3__c469_1	SRR12529321_228473||0_partial_1	RVD	100	0.996489
RGVC23634	Roe_deer_Reticulum-3__c511	SRR12529323_265642||full	RVD	99.957	0.781323
RGVC23637	Roe_deer_Reticulum-3__c64242	SRR12529323_280563||full	RVD	99.989	1
RGVC23638	Roe_deer_Reticulum-3__c66477	SRR12529323_179143||full	RVD	99.988	0.99996
RGVC23639	Roe_deer_Reticulum-3__c768	SRR12529323_238625||full	RVD	99.998	0.997065
RGVC23642	Roe_deer_Reticulum-4__c10170	SRR12529322_111951||full	RVD	99.972	1
RGVC23644	Roe_deer_Reticulum-4__c1070	SRR12529322_431620||full	RVD	100	0.992874
RGVC23645	Roe_deer_Reticulum-4__c112352_1	SRR12529322_341404||full_1	RVD	99.982	0.919829
RGVC23649	Roe_deer_Reticulum-4__c1312	SRR12529322_313002||full	RVD	99.992	1
RGVC23650	Roe_deer_Reticulum-4__c137519_1	SRR12529322_329831||0_partial	RVD	99.992	0.953869
RGVC23653	Roe_deer_Reticulum-4__c1485	SRR12529322_100718||full	RVD	99.999	1
RGVC23654	Roe_deer_Reticulum-4__c1505	SRR12529322_344634||full	RVD	99.998	0.998946
RGVC23655	Roe_deer_Reticulum-4__c1511_1	SRR12529322_230535||full	RVD	100	0.988038
RGVC23660	Roe_deer_Reticulum-4__c1685	SRR12529322_17821||full	RVD	99.946	0.862489
RGVC23668	Roe_deer_Reticulum-4__c2026	ERR3220201_587222||full	RVD	98.01	0.939657
RGVC23668	Roe_deer_Reticulum-4__c2026	IMGVR_UViG_2799112767_000002|2799112767|2799200934|2-65844	IMG/VR v4	98.01	0.939657
RGVC23669	Roe_deer_Reticulum-4__c2092	SRR12529322_117101||full	RVD	99.014	0.756521
RGVC23672	Roe_deer_Reticulum-4__c30769	SRR12529322_151916||full	RVD	99.887	0.789591
RGVC23674	Roe_deer_Reticulum-4__c384	SRR12529322_334469||full	RVD	99.998	0.796834
RGVC23680	Roe_deer_Reticulum-4__c73	SRR12529322_319734||full_1	RVD	99.961	0.929351
RGVC23681	Roe_deer_Reticulum-4__c73729	SRR12529324_99971||full_1	RVD	99.866	0.99845
RGVC23683	Roe_deer_Reticulum-4__c840_1	SRR12529322_66510||0_partial_1	RVD	100	0.989865
RGVC23686	Roe_deer_Reticulum-5__c108975	SRR12529321_327452||full	RVD	99.983	1
RGVC23687	Roe_deer_Reticulum-5__c1092	SRR12529321_517457||full	RVD	100	0.989293
RGVC23696	Roe_deer_Reticulum-5__c141734_1	SRR12529321_248188||full_1	RVD	99.997	0.973513
RGVC23698	Roe_deer_Reticulum-5__c1436	SRR12529321_197286||full	RVD	99.999	0.962302
RGVC23702	Roe_deer_Reticulum-5__c1533	SRR12529321_374880||full	RVD	99.997	0.996243
RGVC23703	Roe_deer_Reticulum-5__c16248	SRR12529321_31750||full	RVD	100	0.956825
RGVC23708	Roe_deer_Reticulum-5__c205509	SRR12529321_371508||full	RVD	99.967	0.959402
RGVC23718	Roe_deer_Reticulum-5__c417	SRR12529321_74157||full	RVD	99.997	0.804104
RGVC23734	Roe_deer_Reticulum-5__c94807	SRR12529321_465701||full	RVD	99.987	1
RGVC23735	Roe_deer_Rumen-1__c10250	SRR12529325_407794||full	RVD	99.989	1
RGVC23736	Roe_deer_Rumen-1__c102533	SRR12529325_244754||full	RVD	99.977	0.897855
RGVC23741	Roe_deer_Rumen-1__c10719	SRR12529156_480873||full	RVD	99.287	0.807143
RGVC23742	Roe_deer_Rumen-1__c10842	SRR12529325_197416||full	RVD	99.98	0.994833
RGVC23743	Roe_deer_Rumen-1__c10894_1	SRR12529325_279413||full_1	RVD	99.967	0.997386
RGVC23745	Roe_deer_Rumen-1__c110039	SRR12529325_67822||full	RVD	99.967	1
RGVC23746	Roe_deer_Rumen-1__c11012	SRR12529325_394190||full	RVD	99.928	0.99563
RGVC23748	Roe_deer_Rumen-1__c1132_1	SRR12529325_446163||full_1	RVD	99.971	1
RGVC23749	Roe_deer_Rumen-1__c11323	SRR12529325_333258||full	RVD	99.994	0.99994
RGVC23751	Roe_deer_Rumen-1__c12112	SRR12529325_733494||full	RVD	99.989	0.772078
RGVC23755	Roe_deer_Rumen-1__c12597	SRR12529325_134967||full	RVD	99.987	1
RGVC23756	Roe_deer_Rumen-1__c12664	SRR12529325_21168||full	RVD	99.933	1
RGVC23757	Roe_deer_Rumen-1__c12685	SRR12529325_224897||full	RVD	99.903	1
RGVC23759	Roe_deer_Rumen-1__c13463	SRR12529325_434554||full	RVD	99.939	0.990393
RGVC23760	Roe_deer_Rumen-1__c13510_1	SRR12529325_574297||full_1	RVD	99.976	0.999355
RGVC23761	Roe_deer_Rumen-1__c136189	SRR12529325_11581||full	RVD	99.998	1
RGVC23762	Roe_deer_Rumen-1__c13622	SRR12529325_387565||full	RVD	99.99	1
RGVC23764	Roe_deer_Rumen-1__c141404	SRR12529325_326785||full	RVD	99.958	0.984628
RGVC23765	Roe_deer_Rumen-1__c14161	SRR12529325_510679||full	RVD	99.998	1
RGVC23767	Roe_deer_Rumen-1__c14434_1	SRR12529325_190778||full_1	RVD	100	1
RGVC23769	Roe_deer_Rumen-1__c149	SRR12529325_451925||full	RVD	99.987	1
RGVC23770	Roe_deer_Rumen-1__c1540	SRR12529325_517753||full	RVD	99.997	1
RGVC23771	Roe_deer_Rumen-1__c1701_1	SRR12529325_708045||full_1	RVD	99.962	1
RGVC23774	Roe_deer_Rumen-1__c1952_1	SRR12529325_207507||full	RVD	99.985	0.975375
RGVC23778	Roe_deer_Rumen-1__c222658	SRR12529325_764551||full	RVD	99.989	1
RGVC23780	Roe_deer_Rumen-1__c225453	SRR12529325_335750||full	RVD	99.974	0.81885
RGVC23781	Roe_deer_Rumen-1__c228952	SRR12529325_646453||full	RVD	99.967	0.933563
RGVC23783	Roe_deer_Rumen-1__c237771	SRR12529325_857353||full	RVD	99.994	0.957858
RGVC23784	Roe_deer_Rumen-1__c245197	SRR12529325_48184||full	RVD	99.983	1
RGVC23786	Roe_deer_Rumen-1__c2625	SRR12529325_77148||full	RVD	99.994	0.800333
RGVC23788	Roe_deer_Rumen-1__c285305	SRR12529325_565186||full	RVD	99.98	1
RGVC23790	Roe_deer_Rumen-1__c3127	SRR12529325_318873||full	RVD	99.997	1
RGVC23792	Roe_deer_Rumen-1__c3281	SRR12529325_897626||full	RVD	99.985	1
RGVC23793	Roe_deer_Rumen-1__c3515	SRR12529325_72805||full	RVD	99.92	0.973457
RGVC23796	Roe_deer_Rumen-1__c383022	SRR12529325_813672||full	RVD	100	1
RGVC23797	Roe_deer_Rumen-1__c387298_1	SRR12529321_116727||0_partial	RVD	99.978	1
RGVC23798	Roe_deer_Rumen-1__c3883_1	SRR12529325_62579||0_partial_1	RVD	100	0.986201
RGVC23799	Roe_deer_Rumen-1__c3900	SRR12529325_707074||full	RVD	99.936	1
RGVC23801	Roe_deer_Rumen-1__c396221_1	SRR12529325_268173||full_1	RVD	99.989	1
RGVC23802	Roe_deer_Rumen-1__c4134_1	SRR12529323_170292||full	RVD	99.958	1
RGVC23804	Roe_deer_Rumen-1__c4675	SRR12529325_256156||full_1	RVD	99.909	0.999978
RGVC23805	Roe_deer_Rumen-1__c4980	SRR12529325_625613||full	RVD	99.998	1
RGVC23806	Roe_deer_Rumen-1__c513030	SRR12529325_168875||full	RVD	99.956	1
RGVC23807	Roe_deer_Rumen-1__c524272	SRR12529325_24608||full	RVD	99.988	1
RGVC23811	Roe_deer_Rumen-1__c6016	SRR12529325_738439||full	RVD	99.956	0.95755
RGVC23813	Roe_deer_Rumen-1__c6700_1	SRR12529325_547179||full_1	RVD	99.992	1
RGVC23815	Roe_deer_Rumen-1__c7039_1	SRR12529325_735039||full_1	RVD	99.902	0.980516
RGVC23816	Roe_deer_Rumen-1__c716	SRR12529325_652344||full	RVD	99.952	0.962412
RGVC23819	Roe_deer_Rumen-1__c7983_1	SRR12529325_910201||full_1	RVD	99.987	1
RGVC23825	Roe_deer_Rumen-1__c9947	SRR12529325_113839||full	RVD	99.991	0.935859
RGVC23827	Roe_deer_Rumen-2__c106628	SRR12529324_696264||full	RVD	99.827	0.843252
RGVC23831	Roe_deer_Rumen-2__c1441	SRR12529324_83629||full	RVD	98.742	0.979477
RGVC23834	Roe_deer_Rumen-2__c154	SRR12529324_10153||full	RVD	99.994	1
RGVC23835	Roe_deer_Rumen-2__c155496	SRR12529324_337991||full	RVD	99.992	1
RGVC23836	Roe_deer_Rumen-2__c1557	SRR12529324_1023788||full	RVD	99.998	0.964713
RGVC23837	Roe_deer_Rumen-2__c156028	SRR12529324_203743||full	RVD	99.957	0.99942
RGVC23842	Roe_deer_Rumen-2__c164628	SRR12529324_532247||full	RVD	99.989	0.773375
RGVC23843	Roe_deer_Rumen-2__c165292	SRR12529324_279466||full	RVD	99.996	0.99996
RGVC23844	Roe_deer_Rumen-2__c1684	SRR12529324_54078||full	RVD	99.981	0.817757
RGVC23848	Roe_deer_Rumen-2__c1824	SRR12529324_804736||full	RVD	99.991	0.986535
RGVC23849	Roe_deer_Rumen-2__c187587	SRR12529324_1126901||full	RVD	99.909	1
RGVC23851	Roe_deer_Rumen-2__c1959_1	SRR12529324_677402||full_1	RVD	99.997	1
RGVC23852	Roe_deer_Rumen-2__c2004	SRR12529324_998260||full	RVD	99.997	0.998143
RGVC23854	Roe_deer_Rumen-2__c203618	SRR12529324_154058||full	RVD	99.998	0.999517
RGVC23855	Roe_deer_Rumen-2__c2061	SRR12529324_78321||full	RVD	99.998	1
RGVC23857	Roe_deer_Rumen-2__c206967	SRR12529324_476262||full	RVD	99.783	0.863973
RGVC23859	Roe_deer_Rumen-2__c212986	SRR12529324_634671||full	RVD	100	0.999497
RGVC23862	Roe_deer_Rumen-2__c2137_1	SRR12529324_675788||0_partial	RVD	99.838	0.973659
RGVC23863	Roe_deer_Rumen-2__c2191	SRR12529324_999784||full	RVD	99.995	0.960121
RGVC23864	Roe_deer_Rumen-2__c2195	SRR12529324_24881||full	RVD	99.994	1
RGVC23867	Roe_deer_Rumen-2__c22410	SRR12529324_154743||full	RVD	99.997	1
RGVC23868	Roe_deer_Rumen-2__c2262	SRR12529324_449635||full	RVD	99.954	0.91184
RGVC23869	Roe_deer_Rumen-2__c2263	SRR12529324_771380||full	RVD	99.972	1
RGVC23870	Roe_deer_Rumen-2__c227521_1	SRR12529324_28233||full_1	RVD	99.991	0.999519
RGVC23871	Roe_deer_Rumen-2__c229_1	SRR12529321_71228||full_1	RVD	100	0.956577
RGVC23873	Roe_deer_Rumen-2__c2422	SRR12529324_692673||full	RVD	99.956	0.777926
RGVC23876	Roe_deer_Rumen-2__c2560	SRR12529324_129803||full	RVD	99.991	0.988817
RGVC23878	Roe_deer_Rumen-2__c2569	SRR12529324_904743||full	RVD	100	0.999955
RGVC23881	Roe_deer_Rumen-2__c2620	SRR12529324_4017||full	RVD	100	0.892228
RGVC23884	Roe_deer_Rumen-2__c270238_1	SRR12529324_201159||full_1	RVD	99.99	1
RGVC23885	Roe_deer_Rumen-2__c2749_1	SRR12529324_855867||full	RVD	100	0.842483
RGVC23886	Roe_deer_Rumen-2__c2784	SRR12529324_1016938||full	RVD	99.989	0.860682
RGVC23887	Roe_deer_Rumen-2__c280589	SRR12529324_632294||full	RVD	99.949	0.784862
RGVC23890	Roe_deer_Rumen-2__c291676	SRR12529324_508715||full	RVD	99.853	0.933442
RGVC23897	Roe_deer_Rumen-2__c339042	SRR12529324_420738||full	RVD	99.992	1
RGVC23900	Roe_deer_Rumen-2__c35450	SRR12529324_518258||full	RVD	99.989	0.958185
RGVC23903	Roe_deer_Rumen-2__c363600	SRR12529324_558716||full_1	RVD	99.843	1
RGVC23904	Roe_deer_Rumen-2__c3641	SRR12529324_519342||full	RVD	99.998	1
RGVC23909	Roe_deer_Rumen-2__c375499	SRR12529324_144620||full	RVD	99.999	1
RGVC23910	Roe_deer_Rumen-2__c3778_1	SRR12529324_259639||full_1	RVD	99.98	0.916054
RGVC23911	Roe_deer_Rumen-2__c3800	SRR12529324_1141708||full	RVD	99.894	0.941256
RGVC23914	Roe_deer_Rumen-2__c3840	SRR12529324_997000||full	RVD	99.996	0.784517
RGVC23916	Roe_deer_Rumen-2__c385675	SRR12529324_132493||full	RVD	99.969	1
RGVC23917	Roe_deer_Rumen-2__c3895	SRR12529324_1017342||full	RVD	100	0.864515
RGVC23926	Roe_deer_Rumen-2__c4010	SRR12529324_1003996||full	RVD	99.996	0.803556
RGVC23928	Roe_deer_Rumen-2__c4041	SRR12529324_1014262||full	RVD	99.994	0.847187
RGVC23931	Roe_deer_Rumen-2__c4107	SRR12529324_547152||full	RVD	100	0.996736
RGVC23933	Roe_deer_Rumen-2__c414177	SRR12529324_1014681||full	RVD	100	0.903406
RGVC23935	Roe_deer_Rumen-2__c4156	SRR12529324_1084406||full	RVD	99.988	1
RGVC23937	Roe_deer_Rumen-2__c4182	SRR12529324_1024096||full	RVD	100	0.822573
RGVC23938	Roe_deer_Rumen-2__c4205	SRR12529324_479874||full	RVD	99.997	0.98553
RGVC23939	Roe_deer_Rumen-2__c425125	SRR12529324_975732||full	RVD	99.965	1
RGVC23940	Roe_deer_Rumen-2__c426354	SRR12529324_961851||full	RVD	99.974	0.778696
RGVC23943	Roe_deer_Rumen-2__c438219_1	SRR12529324_1007720||full_1	RVD	99.993	1
RGVC23944	Roe_deer_Rumen-2__c4385	SRR12529324_252883||full	RVD	99.997	0.907784
RGVC23945	Roe_deer_Rumen-2__c443968	SRR12529324_665186||full	RVD	99.994	0.967607
RGVC23946	Roe_deer_Rumen-2__c4465	SRR12529324_236363||full	RVD	99.988	0.936778
RGVC23952	Roe_deer_Rumen-2__c479393	SRR12529324_422107||full_1	RVD	100	0.924269
RGVC23953	Roe_deer_Rumen-2__c479461	SRR12529324_121215||full_1	RVD	100	0.878103
RGVC23961	Roe_deer_Rumen-2__c5569	SRR12529324_1057685||full	RVD	99.997	0.994637
RGVC23964	Roe_deer_Rumen-2__c5825_1	SRR12529324_627032||full_1	RVD	99.976	1
RGVC23965	Roe_deer_Rumen-2__c58777	SRR12529324_986696||full	RVD	99.992	1
RGVC23966	Roe_deer_Rumen-2__c5998_1	SRR12529324_864581||full_1	RVD	99.993	0.938385
RGVC23967	Roe_deer_Rumen-2__c6083_1	SRR12529324_199146||full_1	RVD	100	0.955419
RGVC23971	Roe_deer_Rumen-2__c6257	SRR12529324_869417||full	RVD	99.971	0.783864
RGVC23972	Roe_deer_Rumen-2__c62933	SRR12529324_1013642||full	RVD	100	0.849398
RGVC23973	Roe_deer_Rumen-2__c6371	SRR12529324_399815||full	RVD	99.946	0.831671
RGVC23977	Roe_deer_Rumen-2__c64989	SRR12529324_176640||full	RVD	99.992	1
RGVC23979	Roe_deer_Rumen-2__c65564	SRR12529324_68116||full	RVD	99.937	0.835842
RGVC23980	Roe_deer_Rumen-2__c67194	SRR12529324_332217||full	RVD	99.943	0.984082
RGVC23983	Roe_deer_Rumen-2__c739	SRR12529324_797438||full	RVD	99.991	1
RGVC23985	Roe_deer_Rumen-2__c76790	SRR12529324_349655||full	RVD	99.971	1
RGVC23986	Roe_deer_Rumen-2__c821	SRR12529324_865014||full	RVD	99.947	0.818866
RGVC23988	Roe_deer_Rumen-2__c91298	SRR12529324_292265||full	RVD	99.987	1
RGVC23989	Roe_deer_Rumen-2__c927	SRR12529321_340922||full	RVD	99.991	0.884658
RGVC23990	Roe_deer_Rumen-2__c96085_1	SRR12529324_87453||full	RVD	99.97	1
RGVC23991	Roe_deer_Rumen-2__c9614	SRR12529324_156701||full	RVD	99.986	0.931149
RGVC23992	Roe_deer_Rumen-3__c1041	SRR12529323_26205||full	RVD	100	0.8621
RGVC23995	Roe_deer_Rumen-3__c112_1	SRR12529323_477493||full_1	RVD	99.964	1
RGVC23997	Roe_deer_Rumen-3__c118359	SRR12529323_238699||full	RVD	99.917	1
RGVC23999	Roe_deer_Rumen-3__c126384	SRR12529323_58869||full	RVD	100	1
RGVC24000	Roe_deer_Rumen-3__c131566	SRR12529323_108484||full	RVD	100	1
RGVC24001	Roe_deer_Rumen-3__c132998	SRR12529323_498475||full_1	RVD	99.969	0.995827
RGVC24002	Roe_deer_Rumen-3__c148161	SRR12529323_445230||full	RVD	99.983	1
RGVC24003	Roe_deer_Rumen-3__c1488	SRR12529323_205793||full	RVD	99.993	0.965148
RGVC24005	Roe_deer_Rumen-3__c152043	SRR12529323_300944||full	RVD	99.994	1
RGVC24007	Roe_deer_Rumen-3__c1574	SRR12529323_275941||full	RVD	99.995	0.99943
RGVC24009	Roe_deer_Rumen-3__c1715_1	SRR12529323_258477||full_1	RVD	99.994	0.953172
RGVC24014	Roe_deer_Rumen-3__c1958	SRR12529323_352714||full	RVD	99.998	1
RGVC24016	Roe_deer_Rumen-3__c204093	SRR12529323_81627||full	RVD	99.993	1
RGVC24020	Roe_deer_Rumen-3__c219689	SRR12529323_477519||full	RVD	99.981	0.987166
RGVC24022	Roe_deer_Rumen-3__c2251	SRR12529323_138449||full	RVD	99.999	0.765503
RGVC24023	Roe_deer_Rumen-3__c225388	SRR12529323_444881||full	RVD	99.889	0.999804
RGVC24026	Roe_deer_Rumen-3__c2325	SRR12529323_446852||full	RVD	100	0.934724
RGVC24027	Roe_deer_Rumen-3__c23295	SRR12529323_170292||full	RVD	99.957	1
RGVC24030	Roe_deer_Rumen-3__c239427	SRR12529323_481787||full	RVD	100	0.973833
RGVC24033	Roe_deer_Rumen-3__c260_1	SRR12529323_174570||0_partial_1	RVD	100	0.985122
RGVC24034	Roe_deer_Rumen-3__c269371	SRR12529323_297590||full	RVD	99.409	0.934496
RGVC24035	Roe_deer_Rumen-3__c27221	SRR12529323_403470||full	RVD	99.989	1
RGVC24036	Roe_deer_Rumen-3__c2741	SRR12529323_19660||full_1	RVD	99.9	0.846208
RGVC24037	Roe_deer_Rumen-3__c27912	SRR12529323_333375||full	RVD	99.943	0.824092
RGVC24040	Roe_deer_Rumen-3__c290317	SRR12529323_150366||full	RVD	99.97	0.886143
RGVC24046	Roe_deer_Rumen-3__c3174_1	SRR12529323_415400||full_1	RVD	100	1
RGVC24047	Roe_deer_Rumen-3__c3199	SRR12529323_473492||full	RVD	99.994	0.8558
RGVC24054	Roe_deer_Rumen-3__c334936	SRR12529323_81691||full_1	RVD	99.985	1
RGVC24057	Roe_deer_Rumen-3__c341399	SRR12529323_351445||full	RVD	99.998	1
RGVC24060	Roe_deer_Rumen-3__c345_1	SRR12529323_440153||full_1	RVD	99.997	1
RGVC24061	Roe_deer_Rumen-3__c3487	SRR12529323_72835||full	RVD	99.996	0.998084
RGVC24062	Roe_deer_Rumen-3__c351383	SRR12529323_287907||full	RVD	100	1
RGVC24064	Roe_deer_Rumen-3__c3558	SRR12529323_195185||full	RVD	99.984	1
RGVC24069	Roe_deer_Rumen-3__c37046	SRR12529323_340963||full	RVD	99.997	1
RGVC24073	Roe_deer_Rumen-3__c3820_1	SRR12529323_268743||0_partial_1	RVD	100	0.940489
RGVC24076	Roe_deer_Rumen-3__c4102_1	SRR12529323_87869||0_partial	RVD	99.982	1
RGVC24078	Roe_deer_Rumen-3__c414	SRR12529323_432091||full	RVD	99.984	1
RGVC24080	Roe_deer_Rumen-3__c420_1	SRR12529323_365273||full_1	RVD	100	1
RGVC24080	Roe_deer_Rumen-3__c420_1	uvig_247652	GPD	100	0.786485
RGVC24081	Roe_deer_Rumen-3__c4284	SRR12529323_395588||full	RVD	99.991	0.931582
RGVC24084	Roe_deer_Rumen-3__c4443	SRR12529323_464615||full	RVD	100	1
RGVC24087	Roe_deer_Rumen-3__c490_1	SRR12529323_2350||0_partial	RVD	100	0.859724
RGVC24088	Roe_deer_Rumen-3__c50245	SRR12529323_92537||full	RVD	100	1
RGVC24090	Roe_deer_Rumen-3__c627	SRR12529323_471885||full	RVD	99.996	1
RGVC24092	Roe_deer_Rumen-3__c644	SRR12529323_277867||full	RVD	100	1
RGVC24095	Roe_deer_Rumen-3__c77049	SRR12529323_343949||full	RVD	99.958	0.780015
RGVC24096	Roe_deer_Rumen-3__c79887	SRR12529323_205938||full	RVD	100	1
RGVC24097	Roe_deer_Rumen-3__c810	SRR12529323_308301||full_1	RVD	100	1
RGVC24100	Roe_deer_Rumen-4__c1128_1	SRR12529322_85333||full_1	RVD	99.993	0.876818
RGVC24103	Roe_deer_Rumen-4__c136127	SRR12529322_109248||full_1	RVD	99.993	0.999704
RGVC24104	Roe_deer_Rumen-4__c1421	SRR12529322_9989||full	RVD	99.999	0.759008
RGVC24105	Roe_deer_Rumen-4__c1499	SRR12529322_343718||full	RVD	100	0.894754
RGVC24106	Roe_deer_Rumen-4__c1501_1	SRR12529322_263907||full_1	RVD	99.995	0.875456
RGVC24107	Roe_deer_Rumen-4__c151247	SRR12529322_422630||full	RVD	99.994	1
RGVC24111	Roe_deer_Rumen-4__c1635	SRR12529322_289182||full	RVD	99.995	1
RGVC24112	Roe_deer_Rumen-4__c167943_1	SRR12529322_245088||full	RVD	99.96	0.929225
RGVC24114	Roe_deer_Rumen-4__c179685	SRR12529322_396922||full	RVD	99.984	0.957277
RGVC24115	Roe_deer_Rumen-4__c1822_1	SRR12529322_28752||full_1	RVD	99.998	0.999991
RGVC24118	Roe_deer_Rumen-4__c186177_1	SRR12529322_357924||full_1	RVD	99.994	1
RGVC24119	Roe_deer_Rumen-4__c186298	SRR12529322_417346||full	RVD	99.995	0.999184
RGVC24121	Roe_deer_Rumen-4__c1870	SRR12529322_425966||full	RVD	99.991	1
RGVC24122	Roe_deer_Rumen-4__c1889	SRR12529322_106235||full	RVD	100	0.998015
RGVC24123	Roe_deer_Rumen-4__c1951	SRR12529322_448088||full	RVD	99.962	1
RGVC24127	Roe_deer_Rumen-4__c2065	SRR12529322_395312||full	RVD	100	1
RGVC24129	Roe_deer_Rumen-4__c224786_1	SRR12529322_31850||full_1	RVD	99.994	0.890944
RGVC24130	Roe_deer_Rumen-4__c226200	SRR12529322_110654||full	RVD	99.941	0.911151
RGVC24136	Roe_deer_Rumen-4__c245369_1	SRR12529322_175686||full_1	RVD	99.966	1
RGVC24137	Roe_deer_Rumen-4__c2460	SRR12529322_444337||full	RVD	99.991	1
RGVC24144	Roe_deer_Rumen-4__c256789	SRR12529322_363824||full	RVD	99.996	1
RGVC24146	Roe_deer_Rumen-4__c2583	IMGVR_UViG_3300028832_000338|3300028832|Ga0265298_10001261	IMG/VR v4	98.42	0.770234
RGVC24147	Roe_deer_Rumen-4__c2599	SRR12529322_406212||full	RVD	100	0.863737
RGVC24151	Roe_deer_Rumen-4__c2626	SRR12529322_397306||full	RVD	99.995	0.778944
RGVC24155	Roe_deer_Rumen-4__c2824	SRR12529322_371153||full	RVD	99.99	0.999028
RGVC24157	Roe_deer_Rumen-4__c2928	SRR12529322_138703||full	RVD	99.99	1
RGVC24158	Roe_deer_Rumen-4__c29901	SRR12529322_392800||full	RVD	99.985	1
RGVC24159	Roe_deer_Rumen-4__c3038_1	SRR12529322_330658||full_1	RVD	99.997	1
RGVC24161	Roe_deer_Rumen-4__c33123	SRR12529322_31358||full	RVD	99.966	1
RGVC24162	Roe_deer_Rumen-4__c362	SRR12529322_360847||full	RVD	100	1
RGVC24163	Roe_deer_Rumen-4__c38455	SRR12529322_240473||full	RVD	99.894	0.815306
RGVC24166	Roe_deer_Rumen-4__c466	SRR12529322_408397||full	RVD	99.998	1
RGVC24170	Roe_deer_Rumen-4__c61519	SRR12529322_152271||full	RVD	99.988	1
RGVC24171	Roe_deer_Rumen-4__c69709	SRR12529322_434851||full	RVD	99.997	1
RGVC24174	Roe_deer_Rumen-4__c989	SRR12529322_102791||full	RVD	99.997	1
RGVC24175	Roe_deer_Rumen-4__c98905_1	SRR12529322_357924||full_1	RVD	99.985	0.994264
RGVC24181	Roe_deer_Rumen-5__c117188	SRR12529321_827452||full	RVD	99.785	1
RGVC24184	Roe_deer_Rumen-5__c1239	SRR12529321_419183||full	RVD	100	1
RGVC24186	Roe_deer_Rumen-5__c1308	SRR12529321_595978||full	RVD	100	0.774478
RGVC24187	Roe_deer_Rumen-5__c130954_1	SRR12529321_508255||full_1	RVD	99.977	1
RGVC24188	Roe_deer_Rumen-5__c132423_1	SRR12529321_40730||full_1	RVD	99.895	0.943204
RGVC24190	Roe_deer_Rumen-5__c133448	SRR12529321_393203||full	RVD	99.973	1
RGVC24192	Roe_deer_Rumen-5__c136202	SRR12529321_465394||full	RVD	99.956	1
RGVC24195	Roe_deer_Rumen-5__c1418	SRR12529321_518639||full	RVD	99.992	0.75696
RGVC24198	Roe_deer_Rumen-5__c1430	SRR12529321_341904||full	RVD	99.994	1
RGVC24202	Roe_deer_Rumen-5__c14657	SRR12529321_306156||full	RVD	99.979	0.751325
RGVC24203	Roe_deer_Rumen-5__c1479_1	SRR12529321_91204||full_1	RVD	99.986	0.994311
RGVC24205	Roe_deer_Rumen-5__c1494	SRR12529321_600483||full	RVD	99.987	0.938694
RGVC24206	Roe_deer_Rumen-5__c1500	SRR12529321_315417||full	RVD	99.997	0.999969
RGVC24209	Roe_deer_Rumen-5__c1578	SRR12529321_315818||full	RVD	99.997	1
RGVC24210	Roe_deer_Rumen-5__c1596	SRR12529321_776179||full	RVD	99.984	1
RGVC24211	Roe_deer_Rumen-5__c1642	SRR12529321_310562||full	RVD	100	1
RGVC24213	Roe_deer_Rumen-5__c168804	SRR12529321_371712||full	RVD	99.971	1
RGVC24214	Roe_deer_Rumen-5__c171504	SRR12529321_213991||full	RVD	99.97	0.986258
RGVC24215	Roe_deer_Rumen-5__c1744	SRR12529321_650355||full	RVD	99.988	1
RGVC24216	Roe_deer_Rumen-5__c1752	SRR12529321_908306||full	RVD	99.995	0.962207
RGVC24217	Roe_deer_Rumen-5__c1771	SRR12529321_579446||full	RVD	99.969	0.809365
RGVC24218	Roe_deer_Rumen-5__c177433	SRR12529321_512306||full	RVD	99.913	1
RGVC24219	Roe_deer_Rumen-5__c1777	SRR12529321_906344||full	RVD	99.976	1
RGVC24220	Roe_deer_Rumen-5__c1794	SRR12529321_239193||full	RVD	99.99	0.946654
RGVC24222	Roe_deer_Rumen-5__c181011	SRR12529321_312918||full	RVD	99.993	1
RGVC24223	Roe_deer_Rumen-5__c1811_1	SRR12529321_466149||0_partial	RVD	100	0.881452
RGVC24224	Roe_deer_Rumen-5__c182355	SRR12529321_200491||full_1	RVD	99.991	0.948142
RGVC24225	Roe_deer_Rumen-5__c182488_1	SRR12529321_90762||full_1	RVD	99.989	1
RGVC24226	Roe_deer_Rumen-5__c1829	SRR12529321_16600||full	RVD	99.992	1
RGVC24228	Roe_deer_Rumen-5__c1864	SRR12529321_287844||full	RVD	99.989	1
RGVC24231	Roe_deer_Rumen-5__c202221	SRR12529321_284962||full	RVD	99.912	0.995824
RGVC24232	Roe_deer_Rumen-5__c203	SRR12529321_27498||full	RVD	99.994	0.943405
RGVC24234	Roe_deer_Rumen-5__c2049	SRR12529321_319668||full_1	RVD	100	0.886605
RGVC24235	Roe_deer_Rumen-5__c2063	SRR12529321_449162||full	RVD	99.994	1
RGVC24237	Roe_deer_Rumen-5__c2108	SRR12529321_7112||full	RVD	99.996	1
RGVC24238	Roe_deer_Rumen-5__c211369_1	SRR12529321_661536||full_1	RVD	99.974	0.998509
RGVC24239	Roe_deer_Rumen-5__c218504	SRR12529321_62518||full	RVD	99.996	1
RGVC24243	Roe_deer_Rumen-5__c222053_1	SRR12529321_732769||full_1	RVD	99.985	0.988891
RGVC24244	Roe_deer_Rumen-5__c223800	SRR12529321_126379||full_1	RVD	99.956	0.857684
RGVC24245	Roe_deer_Rumen-5__c2260	SRR12529321_516782||full	RVD	99.988	0.983237
RGVC24248	Roe_deer_Rumen-5__c23198_1	SRR12529325_464425||full	RVD	99.331	0.863106
RGVC24249	Roe_deer_Rumen-5__c234	SRR12529321_826504||full	RVD	99.993	0.966605
RGVC24253	Roe_deer_Rumen-5__c236755	SRR12529321_854759||full	RVD	99.952	1
RGVC24255	Roe_deer_Rumen-5__c238762_1	SRR12529321_792009||full_1	RVD	99.993	1
RGVC24256	Roe_deer_Rumen-5__c2429	SRR12529321_599123||full	RVD	99.967	0.947942
RGVC24257	Roe_deer_Rumen-5__c244844_1	SRR12529321_353539||full_1	RVD	99.984	0.989954
RGVC24258	Roe_deer_Rumen-5__c2450	SRR12529321_207077||full	RVD	99.968	0.799182
RGVC24259	Roe_deer_Rumen-5__c245154	SRR12529321_621016||full	RVD	99.963	1
RGVC24260	Roe_deer_Rumen-5__c24550_1	SRR12529321_268172||full_1	RVD	99.983	0.999222
RGVC24261	Roe_deer_Rumen-5__c246828_1	SRR12529321_171388||full_1	RVD	99.99	1
RGVC24262	Roe_deer_Rumen-5__c248555	SRR12529321_347054||full	RVD	99.962	0.999578
RGVC24263	Roe_deer_Rumen-5__c2509	SRR12529321_536914||full	RVD	99.995	1
RGVC24264	Roe_deer_Rumen-5__c2510	SRR12529321_145590||full	RVD	99.949	0.856189
RGVC24266	Roe_deer_Rumen-5__c259456	SRR12529321_818577||full	RVD	99.988	1
RGVC24268	Roe_deer_Rumen-5__c2605	SRR12529321_787741||full	RVD	99.957	0.895603
RGVC24269	Roe_deer_Rumen-5__c263089	SRR12529321_667183||full	RVD	99.985	0.958905
RGVC24270	Roe_deer_Rumen-5__c265366	SRR12529321_35911||full	RVD	99.989	1
RGVC24271	Roe_deer_Rumen-5__c26773	SRR12529321_64250||full	RVD	99.93	0.999973
RGVC24272	Roe_deer_Rumen-5__c269428	SRR12529321_752310||full	RVD	99.9	1
RGVC24274	Roe_deer_Rumen-5__c2708_1	SRR12529321_875297||full_1	RVD	99.979	1
RGVC24278	Roe_deer_Rumen-5__c2879	SRR12529321_161214||full	RVD	100	0.759492
RGVC24284	Roe_deer_Rumen-5__c296252_1	SRR12529321_450812||full_1	RVD	99.922	1
RGVC24285	Roe_deer_Rumen-5__c2963	SRR12529321_352772||full	RVD	100	1
RGVC24289	Roe_deer_Rumen-5__c3015_1	SRR12529321_111607||full_1	RVD	99.983	0.99983
RGVC24297	Roe_deer_Rumen-5__c307462	SRR12529321_599302||full	RVD	99.963	0.831256
RGVC24300	Roe_deer_Rumen-5__c3104	SRR12529321_816549||full	RVD	99.994	0.85755
RGVC24305	Roe_deer_Rumen-5__c3148_1	SRR12529321_350704||full_1	RVD	99.99	1
RGVC24313	Roe_deer_Rumen-5__c3222	IMGVR_UViG_3300032007_001080|3300032007|Ga0310695_10002872	IMG/VR v4	97.62	0.770435
RGVC24314	Roe_deer_Rumen-5__c3226_1	SRR12529321_805615||full_1	RVD	99.997	1
RGVC24315	Roe_deer_Rumen-5__c3235	SRR12529321_806393||full	RVD	100	0.84571
RGVC24317	Roe_deer_Rumen-5__c3251	SRR12529321_822482||full	RVD	99.998	0.925674
RGVC24318	Roe_deer_Rumen-5__c3263	SRR12529321_246772||full	RVD	99.999	0.990015
RGVC24322	Roe_deer_Rumen-5__c3285	SRR12529321_465701||full	RVD	100	1
RGVC24327	Roe_deer_Rumen-5__c3321	SRR12529321_257937||full	RVD	100	0.863914
RGVC24331	Roe_deer_Rumen-5__c3359	SRR12529321_817551||full	RVD	99.961	0.969794
RGVC24332	Roe_deer_Rumen-5__c33732	SRR12529321_850479||full	RVD	99.997	1
RGVC24335	Roe_deer_Rumen-5__c3392	SRR12529321_578475||full	RVD	100	0.771043
RGVC24336	Roe_deer_Rumen-5__c339549	SRR12529321_801539||full	RVD	99.999	0.765257
RGVC24342	Roe_deer_Rumen-5__c3453	SRR12529321_60841||full	RVD	100	1
RGVC24344	Roe_deer_Rumen-5__c3467	SRR12529321_573079||full	RVD	99.998	0.999951
RGVC24346	Roe_deer_Rumen-5__c348_1	SRR12529321_167290||full_1	RVD	99.948	0.992738
RGVC24347	Roe_deer_Rumen-5__c3487	SRR12529321_387860||full	RVD	99.997	0.87131
RGVC24348	Roe_deer_Rumen-5__c3492_1	SRR12529321_116713||full_1	RVD	100	0.998485
RGVC24350	Roe_deer_Rumen-5__c35138	SRR12529321_431331||full_1	RVD	99.98	0.927521
RGVC24352	Roe_deer_Rumen-5__c353409_1	SRR12529321_404232||full_1	RVD	99.965	1
RGVC24356	Roe_deer_Rumen-5__c369233	SRR12529321_816135||full	RVD	100	0.840241
RGVC24358	Roe_deer_Rumen-5__c3708_1	SRR12529321_693925||full_1	RVD	99.994	1
RGVC24359	Roe_deer_Rumen-5__c3721_1	SRR12529321_830854||full_1	RVD	99.997	1
RGVC24361	Roe_deer_Rumen-5__c3728_1	SRR12529321_80246||full_1	RVD	100	0.905307
RGVC24364	Roe_deer_Rumen-5__c3745_1	SRR12529321_686042||full_1	RVD	99.964	1
RGVC24365	Roe_deer_Rumen-5__c3759_1	SRR12529321_897403||full_1	RVD	99.893	0.888346
RGVC24368	Roe_deer_Rumen-5__c3839	SRR12529321_436422||full	RVD	99.957	0.994592
RGVC24369	Roe_deer_Rumen-5__c385623_1	SRR12529321_435919||full_1	RVD	99.917	0.954601
RGVC24372	Roe_deer_Rumen-5__c3969	SRR12529321_91479||full	RVD	99.989	0.968621
RGVC24373	Roe_deer_Rumen-5__c3978_1	SRR12529321_77246||full_1	RVD	99.972	0.978364
RGVC24374	Roe_deer_Rumen-5__c3990	SRR12529321_655538||full	RVD	99.986	0.853389
RGVC24375	Roe_deer_Rumen-5__c401797	SRR12529321_59214||full	RVD	99.977	1
RGVC24376	Roe_deer_Rumen-5__c4019	SRR12529321_7112||full	RVD	99.994	1
RGVC24379	Roe_deer_Rumen-5__c407392	SRR12529321_372548||full	RVD	99.989	1
RGVC24380	Roe_deer_Rumen-5__c412726	SRR12529321_711341||full	RVD	99.883	0.856712
RGVC24381	Roe_deer_Rumen-5__c4143	SRR12529321_765875||full	RVD	99.979	1
RGVC24382	Roe_deer_Rumen-5__c4170_1	SRR12529321_584566||full_1	RVD	100	1
RGVC24383	Roe_deer_Rumen-5__c4187	SRR12529321_667334||full	RVD	100	0.999919
RGVC24385	Roe_deer_Rumen-5__c420035	SRR12529321_375745||full	RVD	99.994	1
RGVC24386	Roe_deer_Rumen-5__c421798	SRR4435576_430633||full	RVD	99.471	0.98498
RGVC24387	Roe_deer_Rumen-5__c427347	SRR12529323_35384||full_1	RVD	99.982	0.995876
RGVC24388	Roe_deer_Rumen-5__c428851_1	SRR12529321_526030||full	RVD	99.998	1
RGVC24389	Roe_deer_Rumen-5__c432583	SRR12529321_426661||full	RVD	100	0.830254
RGVC24391	Roe_deer_Rumen-5__c435	SRR12529321_127967||full	RVD	99.995	0.999973
RGVC24392	Roe_deer_Rumen-5__c4375	SRR12529321_808294||full	RVD	99.99	1
RGVC24395	Roe_deer_Rumen-5__c4500	SRR12529321_237609||full	RVD	99.995	0.998732
RGVC24400	Roe_deer_Rumen-5__c466455	SRR12529321_284260||full	RVD	99.958	0.947635
RGVC24401	Roe_deer_Rumen-5__c4673_1	SRR12529321_350976||full_1	RVD	99.996	0.996836
RGVC24402	Roe_deer_Rumen-5__c468047_1	SRR12529321_189372||full_1	RVD	99.977	0.845211
RGVC24403	Roe_deer_Rumen-5__c4691	SRR12529321_936604||full_1	RVD	99.992	1
RGVC24404	Roe_deer_Rumen-5__c4724	SRR12529321_672442||full	RVD	99.999	1
RGVC24405	Roe_deer_Rumen-5__c4730	SRR12529321_505086||full	RVD	99.99	0.999941
RGVC24407	Roe_deer_Rumen-5__c4742_1	SRR12529321_297145||full_1	RVD	99.988	1
RGVC24411	Roe_deer_Rumen-5__c486352	SRR12529321_631712||full	RVD	99.986	1
RGVC24412	Roe_deer_Rumen-5__c486915	SRR12529321_465493||full	RVD	99.964	1
RGVC24414	Roe_deer_Rumen-5__c490470	SRR12529321_765132||full	RVD	99.988	0.999883
RGVC24416	Roe_deer_Rumen-5__c4954_1	SRR12529321_3653||full_1	RVD	99.965	1
RGVC24420	Roe_deer_Rumen-5__c497878	SRR12529321_502915||full	RVD	99.888	0.910876
RGVC24423	Roe_deer_Rumen-5__c505009	SRR12529321_431385||full	RVD	99.952	0.895753
RGVC24424	Roe_deer_Rumen-5__c520847	SRR12529321_645768||full	RVD	99.915	0.951913
RGVC24425	Roe_deer_Rumen-5__c531759	SRR12529321_605127||full	RVD	99.981	1
RGVC24426	Roe_deer_Rumen-5__c538772	SRR12529321_894580||full	RVD	99.981	1
RGVC24427	Roe_deer_Rumen-5__c545114	SRR12529324_1022380||full	RVD	99.912	0.983483
RGVC24429	Roe_deer_Rumen-5__c553755	SRR12529321_543764||full	RVD	99.985	0.787955
RGVC24430	Roe_deer_Rumen-5__c564015	SRR12529321_717857||full	RVD	99.959	0.999976
RGVC24431	Roe_deer_Rumen-5__c564640	SRR12529321_431004||full	RVD	99.979	0.871656
RGVC24432	Roe_deer_Rumen-5__c57139	SRR12529321_524108||full	RVD	99.989	0.993271
RGVC24433	Roe_deer_Rumen-5__c582068	SRR12529321_402806||full_1	RVD	100	0.984207
RGVC24434	Roe_deer_Rumen-5__c582125_1	SRR12529321_901227||full_1	RVD	100	0.811333
RGVC24436	Roe_deer_Rumen-5__c582407	SRR12529321_222124||full	RVD	99.989	0.768097
RGVC24437	Roe_deer_Rumen-5__c602	SRR12529321_287714||full	RVD	99.996	0.999825
RGVC24438	Roe_deer_Rumen-5__c617	SRR12529321_923459||full	RVD	99.994	1
RGVC24440	Roe_deer_Rumen-5__c64919_1	SRR12529321_456618||full_1	RVD	99.99	1
RGVC24443	Roe_deer_Rumen-5__c74128	SRR12529321_215994||full	RVD	99.892	0.966059
RGVC24446	Roe_deer_Rumen-5__c78797	SRR12529321_933145||full	RVD	99.979	1
RGVC24450	Roe_deer_Rumen-5__c85590	SRR12529321_675120||full	RVD	99.948	1
RGVC24451	Roe_deer_Rumen-5__c88632	SRR12529321_877243||full	RVD	99.98	0.998529
RGVC24453	Roe_deer_Rumen-5__c91536_1	SRR12529321_674301||full_1	RVD	99.995	0.972877
RGVC24454	Roe_deer_Rumen-5__c928	SRR12529321_502809||full	RVD	99.998	1
RGVC24456	Roe_deer_Rumen-5__c998	SRR12529321_498924||full	RVD	99.943	0.923267
RGVC24641	s1176.goat-hifiasm001221l_1	SRR12529378_1599103||full_1	RVD	99.959	0.986576
RGVC24910	s14241.goat-hifiasm014447l	SRR12529321_505086||full	RVD	96.621	0.817116
RGVC25093	s16018.goat-hifiasm016237l	SRR12529379_347459||full	RVD	99.88	1
RGVC25207	s17152.goat-hifiasm017381l_1	SRR12529380_1121333||full	RVD	99.982	0.762375
RGVC25245	s17674.dairy-hifiasm017675l	TS.01_1225813||full	RVD	98.949	0.998714
RGVC25473	s2012.dairy-hifiasm002013l_1	IMGVR_UViG_3300033463_000196|3300033463|Ga0310690_10001042	IMG/VR v4	97.39	0.778163
RGVC25596	s21460.dairy-hifiasm021462l	SRR12529265_2673292||full	RVD	94.183	0.79653
RGVC25603	s2156.goat-hifiasm002229l_1	SRR12529376_910602||full_1	RVD	99.99	0.789582
RGVC25780	s2352.goat-hifiasm002428l_1	SRR12529378_151232||full	RVD	99.967	0.962847
RGVC25849	s243.goat-hifiasm000248l_2	SRR12529381_1239521||full	RVD	99.999	1
RGVC25884	s2471.goat-hifiasm002547c	SRR12529378_371822||full	RVD	99.996	0.81544
RGVC25974	s25766.goat-hifiasm026065l	EarthsVirome_11802	PIGEON	96.829	0.7985
RGVC25974	s25766.goat-hifiasm026065l	IMGVR_UViG_2061766007_000043|2061766007|rumenHiSeq_NODE_1033975_len_31256_cov_19_540953	IMG/VR v4	96.83	0.7985
RGVC26173	s28103.dairy-hifiasm028106l	IMGVR_UViG_3300037400_000496|3300037400|Ga0392372_0000530	IMG/VR v4	96.72	0.774102
RGVC26180	s28212.goat-hifiasm028531l	TS.01_660452||full	RVD	97.047	1
RGVC26394	s30886.dairy-hifiasm030889l	ERR2027918_576900||full	RVD	94.841	0.851863
RGVC26399	s30937.goat-hifiasm031277l	ERR2027894_84629||full_1	RVD	91.036	0.915595
RGVC26410	s31019.goat-hifiasm031360l	SRR12529380_172663||full_1	RVD	99.839	0.850165
RGVC26618	s33541.dairy-hifiasm033545c	ERR3275133_469255||full	RVD	98.239	0.894228
RGVC26665	s34085.dairy-hifiasm034089l	SRR8397927_21019||full_1	RVD	98.439	0.999801
RGVC26665	s34085.dairy-hifiasm034089l	IMGVR_UViG_3300031760_000224|3300031760|Ga0326513_10000349	IMG/VR v4	97.34	0.999801
RGVC26753	s3506.goat-hifiasm003602l	SRR12529379_299330||full	RVD	99.898	0.752566
RGVC26926	s36995.goat-hifiasm037378l	SRR12529380_1616747||full	RVD	99.899	0.904918
RGVC26939	s3716.dairy-hifiasm003717l	IMGVR_UViG_2799112692_000001|2799112692|2799191877|201500-230994	IMG/VR v4	96.91	0.751179
RGVC27147	s40239.goat-hifiasm040648l	SRR12529378_1075120||full	RVD	99.966	1
RGVC27173	s40609.goat-hifiasm041024l_1	SRR12529323_149721||full_1	RVD	91.106	0.882695
RGVC27173	s40609.goat-hifiasm041024l_1	IMGVR_UViG_3300028888_004032|3300028888|Ga0247609_10001329	IMG/VR v4	90.54	0.880564
RGVC27207	s4107.goat-hifiasm004213l_1	SRR12529379_1112713||full	RVD	99.965	0.866845
RGVC27235	s41415.dairy-hifiasm041420l	SRR10912534_58450||full	RVD	99.422	0.964829
RGVC27281	s422.goat-hifiasm000437c_3	SRR12529378_1291700||full	RVD	99.974	0.917778
RGVC27479	s45315.dairy-hifiasm045320l	ERR3275113_257888||full	RVD	92.464	0.8784
RGVC27742	s49114.dairy-hifiasm049119l_1	IMGVR_UViG_2861688124_000003|2861688124|2861688131|16188-49977	IMG/VR v4	99.94	0.95398
RGVC27837	s50533.dairy-hifiasm050538l_1	IMGVR_UViG_2634166445_000001|2634166445|2634540820|689686-720470	IMG/VR v4	97.73	0.761103
RGVC28017	s5366.goat-hifiasm005486l	SRR12529378_1543210||full	RVD	99.998	0.975303
RGVC28135	s5591.goat-hifiasm005712l	SRR12529378_1539565||full	RVD	99.995	0.936745
RGVC28292	s58376.dairy-hifiasm058382l	SRR8387721_640865||full	RVD	96.312	0.929664
RGVC28292	s58376.dairy-hifiasm058382l	IMGVR_UViG_3300021400_000121|3300021400|Ga0224422_12197305	IMG/VR v4	97.03	1
RGVC28555	s634.goat-hifiasm000657l_1	SRR12529381_949336||full	RVD	99.996	0.9631
RGVC28588	s6399.goat-hifiasm006529l	SRR12529376_45008||full	RVD	99.204	0.999667
RGVC28856	s69258.dairy-hifiasm069269l	IMGVR_UViG_3300037400_002464|3300037400|Ga0392372_0000477	IMG/VR v4	90.15	0.86263
RGVC29138	s75192.dairy-hifiasm075204l	ERR3201408_566613||full	RVD	95.409	0.874243
RGVC29230	s77232.dairy-hifiasm077244l	ERR3201411_173911||full	RVD	92.568	0.843598
RGVC29408	s8127.goat-hifiasm008277l	SRR7907951_838768||full	RVD	97.095	0.926997
RGVC29433	s8172.dairy-hifiasm008173l	ERR3211449_503791||full	RVD	91.177	0.767962
RGVC29465	s82162.dairy-hifiasm082175l	SRR10912539_2117029||full	RVD	92.295	0.765463
RGVC29635	s859.goat-hifiasm000896l_1	SRR12529377_898509||full_1	RVD	99.999	1
RGVC29719	s87522.dairy-hifiasm087537l	ERR3201390_1639366||full	RVD	93.725	0.775591
RGVC29761	s88462.dairy-hifiasm088477l	SRR8387716_462962||full	RVD	96.018	0.824428
RGVC29860	s9078.goat-hifiasm009237l_1	SRR12529381_939831||full_1	RVD	99.908	1
RGVC29888	s9161.goat-hifiasm009321l	SRR12529378_1468789||full	RVD	99.974	0.885169
RGVC29951	s932.goat-hifiasm000969l_2	SRR12529376_556897||full_1	RVD	100	0.970133
RGVC30132	s98170.dairy-hifiasm098188l	SRR11784285_626052||full	RVD	97.941	0.905086
RGVC30193	Sheep_Abomasum-1__c103250	SRR12529269_2091016||full	RVD	99.99	0.778349
RGVC30195	Sheep_Abomasum-1__c112981	SRR12529269_459060||0_partial_1	RVD	100	0.998021
RGVC30197	Sheep_Abomasum-1__c114377	SRR12529269_2153959||full	RVD	100	0.944463
RGVC30198	Sheep_Abomasum-1__c122285	SRR12529269_1939656||full	RVD	99.958	0.993754
RGVC30203	Sheep_Abomasum-1__c132242	SRR12529269_2160916||full	RVD	99.981	0.858278
RGVC30205	Sheep_Abomasum-1__c136309	SRR12529269_51643||full	RVD	99.989	0.874457
RGVC30206	Sheep_Abomasum-1__c138662	SRR12529269_2160328||full	RVD	99.981	0.960723
RGVC30208	Sheep_Abomasum-1__c148434	SRR12529269_516613||full	RVD	99.971	0.895238
RGVC30210	Sheep_Abomasum-1__c169272	SRR12529269_255518||full	RVD	99.995	0.902564
RGVC30213	Sheep_Abomasum-1__c206085	SRR12529269_778095||full	RVD	99.989	0.976413
RGVC30226	Sheep_Abomasum-1__c438025	SRR8387720_1352930||full	RVD	98.073	0.771233
RGVC30230	Sheep_Abomasum-1__c500436	SRR12529269_2285979||full	RVD	99.988	0.960539
RGVC30232	Sheep_Abomasum-1__c65568	SRR12529269_135503||full	RVD	99.864	0.874543
RGVC30233	Sheep_Abomasum-1__c68749_1	SRR12529269_1997022||0_partial	RVD	99.997	0.962468
RGVC30239	Sheep_Abomasum-2__c125353	SRR12529268_2233019||full	RVD	99.992	0.839883
RGVC30242	Sheep_Abomasum-2__c127624	SRR12529268_2233415||full	RVD	99.982	0.978897
RGVC30243	Sheep_Abomasum-2__c133864	SRR12529268_2425914||full	RVD	99.974	0.776797
RGVC30246	Sheep_Abomasum-2__c141656	SRR12529268_777441||full	RVD	99.966	0.894421
RGVC30247	Sheep_Abomasum-2__c144335	SRR12529268_2250423||full	RVD	99.989	0.807117
RGVC30251	Sheep_Abomasum-2__c152	SRR12529268_436397||full	RVD	99.985	0.824472
RGVC30252	Sheep_Abomasum-2__c153529	SRR12529268_2249050||full	RVD	100	0.879425
RGVC30254	Sheep_Abomasum-2__c164093	SRR12529268_245739||full	RVD	99.95	0.959345
RGVC30255	Sheep_Abomasum-2__c16616	SRR12529268_933687||full	RVD	99.964	0.863876
RGVC30258	Sheep_Abomasum-2__c19579	SRR12529268_281351||full	RVD	99.675	0.753049
RGVC30275	Sheep_Abomasum-2__c337526	SRR12529268_509022||full	RVD	99.996	0.81127
RGVC30282	Sheep_Abomasum-2__c380446	SRR12529268_550411||full	RVD	99.997	0.996901
RGVC30285	Sheep_Abomasum-2__c414860	SRR11784295_76519||full	RVD	96.116	0.802948
RGVC30288	Sheep_Abomasum-2__c478	SRR12529268_2246034||full	RVD	99.996	0.841346
RGVC30293	Sheep_Abomasum-2__c559	SRR12529268_578303||full	RVD	100	0.916137
RGVC30296	Sheep_Abomasum-2__c580788_1	SRR12529268_276475||full_1	RVD	100	0.921442
RGVC30298	Sheep_Abomasum-2__c626439	IMGVR_UViG_2648501658_000001|2648501658|2648556511|160845-201091	IMG/VR v4	98.28	0.90415
RGVC30300	Sheep_Abomasum-2__c70749	SRR12529268_1660289||full	RVD	100	0.980194
RGVC30303	Sheep_Abomasum-2__c89351	IMGVR_UViG_2519103166_000009|2519103166|2519122654|72165-128582	IMG/VR v4	99.99	0.920088
RGVC30306	Sheep_Abomasum-2__c99160	SRR12529268_1213703||full	RVD	99.996	0.943215
RGVC30307	Sheep_Abomasum-2__c99633	SRR12529268_1093192||full	RVD	99.981	0.966875
RGVC30321	Sheep_Abomasum-4__c150740	SRR12529266_2106068||full	RVD	99.996	0.886291
RGVC30322	Sheep_Abomasum-4__c16484	SRR12529266_1558918||full	RVD	99.954	0.936716
RGVC30328	Sheep_Abomasum-4__c215611	SRR12529266_287335||full	RVD	99.922	1
RGVC30335	Sheep_Abomasum-4__c232189	SRR12529266_2294575||full	RVD	99.993	0.924118
RGVC30337	Sheep_Abomasum-4__c236866	SRR12529266_2462690||full	RVD	99.991	0.817929
RGVC30342	Sheep_Abomasum-4__c246331	SRR12529266_1139110||full	RVD	99.969	0.782618
RGVC30344	Sheep_Abomasum-4__c249589	SRR12529266_2335564||full	RVD	99.979	0.823519
RGVC30350	Sheep_Abomasum-4__c273344	SRR12529266_388004||full	RVD	99.99	0.999834
RGVC30356	Sheep_Abomasum-4__c336484	SRR12529267_12463||full	RVD	100	0.975293
RGVC30357	Sheep_Abomasum-4__c347	SRR12529266_536917||full	RVD	99.998	1
RGVC30359	Sheep_Abomasum-4__c355684	SRR8387720_749522||full	RVD	99.882	0.990062
RGVC30360	Sheep_Abomasum-4__c388158	SRR12529266_948125||full	RVD	99.818	0.939063
RGVC30362	Sheep_Abomasum-4__c398414	SRR12529266_643152||full	RVD	99.993	0.918151
RGVC30367	Sheep_Abomasum-4__c463985	SRR12529266_1745605||full	RVD	99.993	0.811414
RGVC30373	Sheep_Abomasum-4__c524329	SRR12529266_671183||full	RVD	99.876	0.94371
RGVC30382	Sheep_Abomasum-4__c591882	SRR873605_1891253||full	RVD	93.315	0.819505
RGVC30384	Sheep_Abomasum-4__c612633	SRR12529266_1552893||full	RVD	99.982	1
RGVC30389	Sheep_Abomasum-4__c632474_1	SRR12529268_1705032||full_1	RVD	99.995	1
RGVC30390	Sheep_Abomasum-4__c635246	SRR12529266_1322959||full	RVD	99.907	0.986542
RGVC30403	Sheep_Abomasum-4__c82609	SRR12529266_320341||full	RVD	99.973	0.87205
RGVC30404	Sheep_Abomasum-4__c84	SRR12529266_716813||full	RVD	99.967	0.769507
RGVC30410	Sheep_Abomasum-4__c99	SRR12529266_103878||full	RVD	99.99	0.910489
RGVC30414	Sheep_Abomasum-5__c109235	SRR12529265_2698374||full	RVD	99.983	0.863897
RGVC30417	Sheep_Abomasum-5__c120212	SRR12529265_2653946||full	RVD	99.957	0.954024
RGVC30419	Sheep_Abomasum-5__c125010	SRR12529265_1058103||full	RVD	99.919	0.988425
RGVC30420	Sheep_Abomasum-5__c12696	Yak.MQ02_1362912||full	RVD	90.913	0.861319
RGVC30421	Sheep_Abomasum-5__c128869	SRR12529265_2689051||full	RVD	99.977	0.967754
RGVC30428	Sheep_Abomasum-5__c201217	SRR12529265_1978141||full	RVD	99.943	0.96234
RGVC30433	Sheep_Abomasum-5__c233892	SRR12529265_2997427||full	RVD	99.999	1
RGVC30436	Sheep_Abomasum-5__c328691	SRR12529265_1009654||full	RVD	99.958	0.765852
RGVC30438	Sheep_Abomasum-5__c335922	SRR12529265_845614||full	RVD	99.997	1
RGVC30439	Sheep_Abomasum-5__c356	SRR12529266_952496||full_1	RVD	99.672	0.813004
RGVC30442	Sheep_Abomasum-5__c369729	SRR12529265_1197389||full	RVD	99.992	1
RGVC30443	Sheep_Abomasum-5__c369756	SRR12529265_2376637||full	RVD	100	1
RGVC30456	Sheep_Abomasum-5__c480517	SRR12529265_242450||full	RVD	99.988	0.82038
RGVC30463	Sheep_Abomasum-5__c525730	SRR12529265_454680||full	RVD	99.995	0.970576
RGVC30464	Sheep_Abomasum-5__c545030	SRR12529265_713661||full_1	RVD	99.914	0.892835
RGVC30468	Sheep_Abomasum-5__c598_1	SRR12529268_914167||full_1	RVD	99.986	1
RGVC30469	Sheep_Abomasum-5__c7808	SRR12529265_2080131||full	RVD	99.835	0.847762
RGVC30470	Sheep_Abomasum-5__c790	SRR12529265_895963||full	RVD	100	1
RGVC30472	Sheep_Abomasum-5__c96916	ERR3201400_716745||full	RVD	96.595	0.994648
RGVC30472	Sheep_Abomasum-5__c96916	IMGVR_UViG_3300021399_000523|3300021399|Ga0224415_10002301	IMG/VR v4	94.61	0.958326
RGVC30475	Sheep_Cecum-1__c117	SRR12529269_1373773||full	RVD	99.981	0.988201
RGVC30480	Sheep_Cecum-1__c197	SRR12529269_1497690||full	RVD	99.987	0.987416
RGVC30490	Sheep_Cecum-1__c267737	SRR12529269_2143516||full	RVD	99.941	0.835832
RGVC30504	Sheep_Cecum-1__c68	SRR12529269_948012||full	RVD	100	0.992239
RGVC30506	Sheep_Cecum-1__c749668	SRR8387716_935706||full	RVD	99.282	0.977204
RGVC30560	Sheep_Cecum-4__c125928	SRR12529266_1057923||full	RVD	99.957	0.869936
RGVC30561	Sheep_Cecum-4__c126353	SRR12529266_1798471||full	RVD	99.973	0.991658
RGVC30565	Sheep_Cecum-4__c252142	SRR12529266_1422512||full	RVD	100	0.973133
RGVC30572	Sheep_Cecum-5__c204776	SRR12529265_125566||full	RVD	99.998	0.770755
RGVC30608	Sheep_Colon-1__c363423	SRR12529269_280660||full	RVD	99.957	0.989022
RGVC30624	Sheep_Colon-1__c472223	SRR12529268_1008007||full	RVD	99.993	0.977655
RGVC30640	Sheep_Colon-1__c682742	SRR12529269_759860||full	RVD	99.931	0.785459
RGVC30683	Sheep_Colon-2__c350478	IMGVR_UViG_3300045988_133319|3300045988|Ga0495776_087802	IMG/VR v4	98.22	0.819993
RGVC30693	Sheep_Colon-2__c413599	IMGVR_UViG_3300031555_000244|3300031555|Ga0318466_10031026	IMG/VR v4	97.99	0.885017
RGVC30755	Sheep_Colon-3__c190366	SRR12529267_1279676||full	RVD	99.988	0.781995
RGVC30768	Sheep_Colon-3__c411945	IMGVR_UViG_3300029705_004935|3300029705|Ga0224414_10030309	IMG/VR v4	95.82	1
RGVC30791	Sheep_Colon-3__c609573	IMGVR_UViG_3300029305_003836|3300029305|Ga0307249_10024028	IMG/VR v4	94.72	0.797804
RGVC30863	Sheep_Colon-4__c590	SRR12529266_2568351||full	RVD	99.993	0.981441
RGVC30868	Sheep_Colon-4__c645830	SRR12529268_1691863||full	RVD	98.554	0.98842
RGVC30926	Sheep_Colon-5__c775453	SRR12529265_77428||full	RVD	99.913	0.994619
RGVC30936	Sheep_Duodenum-1__c103	SRR12529269_2138455||full	RVD	99.995	0.937931
RGVC30938	Sheep_Duodenum-1__c110901	SRR12529269_410778||full	RVD	99.831	1
RGVC30944	Sheep_Duodenum-1__c139	SRR12529269_477222||full	RVD	99.954	0.949783
RGVC30947	Sheep_Duodenum-1__c147091	SRR8387715_158854||full	RVD	99.817	0.999976
RGVC30951	Sheep_Duodenum-1__c164809	SRR12529269_2086786||full	RVD	99.991	0.844177
RGVC30953	Sheep_Duodenum-1__c192	SRR12529269_574881||full	RVD	99.997	0.971691
RGVC30956	Sheep_Duodenum-1__c26787	SRR12529269_2159054||full	RVD	99.994	0.774726
RGVC30969	Sheep_Duodenum-1__c57295	virsorter_curated_3693	PIGEON	99.937	0.951723
RGVC30969	Sheep_Duodenum-1__c57295	IMGVR_UViG_643348510_000005|643348510|643348592|3734116-3770226	IMG/VR v4	99.96	1
RGVC30970	Sheep_Duodenum-1__c575	SRR12529269_1610972||full	RVD	99.995	0.995721
RGVC30975	Sheep_Duodenum-1__c657	SRR12529269_799732||full	RVD	99.996	0.774285
RGVC30977	Sheep_Duodenum-1__c706	SRR12529269_391702||full	RVD	100	0.850259
RGVC30980	Sheep_Duodenum-1__c751	SRR12529269_724914||full	RVD	99.993	1
RGVC31005	Sheep_Duodenum-2__c133027	SRR873607_37801||full_1	RVD	95.162	0.772552
RGVC31033	Sheep_Duodenum-2__c205936	SRR8387714_334032||full	RVD	99.693	1
RGVC31040	Sheep_Duodenum-2__c213	SRR12529268_309928||full	RVD	99.625	0.922977
RGVC31051	Sheep_Duodenum-2__c235209	IMGVR_UViG_2744054439_000003|2744054439|2744058419|290934-306500	IMG/VR v4	99.92	1
RGVC31065	Sheep_Duodenum-2__c253020_1	IMGVR_UViG_2847680403_000001|2847680403|2847680403|1775724-1798975	IMG/VR v4	99.95	0.807585
RGVC31068	Sheep_Duodenum-2__c268166_1	IMGVR_UViG_2600255072_000001|2600255072|2600284386|18019-55695	IMG/VR v4	99.99	0.980304
RGVC31069	Sheep_Duodenum-2__c26953	SRR8387716_485238||full	RVD	99.973	0.995775
RGVC31074	Sheep_Duodenum-2__c284144_1	IMGVR_UViG_2917309686_000001|2917309686|2917309686|566786-575883	IMG/VR v4	99.99	1
RGVC31077	Sheep_Duodenum-2__c292080	SRR12529267_927664||full	RVD	100	0.977038
RGVC31079	Sheep_Duodenum-2__c292824	SRR12529266_1212102||full	RVD	99.997	0.92601
RGVC31116	Sheep_Duodenum-2__c464	SRR12529268_1860183||full	RVD	99.993	0.901792
RGVC31133	Sheep_Duodenum-2__c690	SRR12529268_120409||full	RVD	99.899	0.978371
RGVC31149	Sheep_Duodenum-3__c1202_1	SRR12529267_1890581||full	RVD	100	0.932469
RGVC31153	Sheep_Duodenum-3__c1258	SRR12529267_2249274||full	RVD	100	0.775689
RGVC31154	Sheep_Duodenum-3__c1301_1	SRR12529267_186973||full_1	RVD	100	0.889931
RGVC31161	Sheep_Duodenum-3__c163452	SRR12529267_97079||full	RVD	99.977	0.96737
RGVC31162	Sheep_Duodenum-3__c16860	SRR12529267_309594||full	RVD	99.541	0.940659
RGVC31168	Sheep_Duodenum-3__c183942	ERR4297096_497315||full	RVD	92.368	0.850922
RGVC31189	Sheep_Duodenum-3__c268788_1	SRR12529267_2409507||full_1	RVD	99.991	0.999536
RGVC31190	Sheep_Duodenum-3__c269	SRR12529267_1099406||full	RVD	99.991	0.989833
RGVC31193	Sheep_Duodenum-3__c28816	SRR12529267_467818||full	RVD	99.915	0.997121
RGVC31198	Sheep_Duodenum-3__c301282	SRR12529267_1110428||full	RVD	99.987	0.914554
RGVC31199	Sheep_Duodenum-3__c301834	SRR12529267_2241937||full	RVD	99.992	0.838039
RGVC31205	Sheep_Duodenum-3__c314012	SRR12529267_1658677||full	RVD	99.972	0.795931
RGVC31208	Sheep_Duodenum-3__c317076	SRR12529267_903047||full	RVD	99.99	0.952409
RGVC31213	Sheep_Duodenum-3__c328	SRR12529267_2500205||full	RVD	100	0.806577
RGVC31217	Sheep_Duodenum-3__c345227	SRR1206671_546537||full	RVD	95.249	0.765947
RGVC31222	Sheep_Duodenum-3__c360	SRR12529267_1446809||full	RVD	99.991	0.989922
RGVC31237	Sheep_Duodenum-3__c442394	SRR12529267_2004085||full	RVD	99.982	0.958819
RGVC31238	Sheep_Duodenum-3__c444860	SRR12529267_2295415||full	RVD	99.976	0.932906
RGVC31246	Sheep_Duodenum-3__c469759	SRR12529269_580985||full	RVD	98.302	0.979472
RGVC31256	Sheep_Duodenum-3__c506	SRR12529267_37239||full	RVD	99.959	0.97548
RGVC31277	Sheep_Duodenum-3__c609	SRR12529266_113739||full	RVD	99.991	0.999884
RGVC31284	Sheep_Duodenum-3__c64779	SRR12529267_140295||full_1	RVD	99.972	0.789388
RGVC31287	Sheep_Duodenum-3__c65814	SRR12529268_1016141||full	RVD	99.954	0.910535
RGVC31300	Sheep_Duodenum-3__c703	SRR12529267_2240046||full	RVD	99.96	0.823483
RGVC31303	Sheep_Duodenum-3__c707692	SRR12529267_1485315||full	RVD	99.498	0.999848
RGVC31305	Sheep_Duodenum-3__c719824	SRR12529267_616399||full_1	RVD	99.969	0.863512
RGVC31316	Sheep_Duodenum-3__c835	SRR12529267_847619||full	RVD	100	0.967729
RGVC31321	Sheep_Duodenum-4__c106349	SRR8387715_352662||full	RVD	99.986	0.965038
RGVC31322	Sheep_Duodenum-4__c10754	SRR12529266_741379||full	RVD	99.904	1
RGVC31325	Sheep_Duodenum-4__c116	SRR12529266_1513968||full	RVD	99.997	0.786949
RGVC31328	Sheep_Duodenum-4__c12914	SRR12529266_1787906||full	RVD	99.997	1
RGVC31354	Sheep_Duodenum-4__c178637	SRR12529266_1166012||full	RVD	99.975	1
RGVC31360	Sheep_Duodenum-4__c187953	SRR8387715_98852||full	RVD	99.921	1
RGVC31363	Sheep_Duodenum-4__c19972	SRR12529266_299077||full	RVD	99.977	0.790538
RGVC31364	Sheep_Duodenum-4__c201450	SRR12529266_1116045||full	RVD	99.987	0.877874
RGVC31365	Sheep_Duodenum-4__c202	SRR12529266_928242||full	RVD	99.965	0.879532
RGVC31378	Sheep_Duodenum-4__c22628	SRR12529322_106039||full	RVD	96.094	0.807407
RGVC31386	Sheep_Duodenum-4__c239150	SRR12529266_151490||full	RVD	99.766	0.945387
RGVC31415	Sheep_Duodenum-4__c287045_1	SRR12529266_997488||full_1	RVD	99.985	1
RGVC31419	Sheep_Duodenum-4__c298089	ERR4297086_453611||full	RVD	99.008	0.801888
RGVC31429	Sheep_Duodenum-4__c31908	SRR12529266_319424||full	RVD	99.978	0.965498
RGVC31434	Sheep_Duodenum-4__c439	SRR12529266_1939907||full	RVD	99.993	0.99982
RGVC31436	Sheep_Duodenum-4__c465	SRR12529266_243716||full	RVD	100	1
RGVC31457	Sheep_Duodenum-4__c710	SRR12529266_1796270||full	RVD	99.998	0.991124
RGVC31462	Sheep_Duodenum-4__c75	ERR3220221_1017057||full	RVD	90.637	0.881184
RGVC31467	Sheep_Duodenum-4__c777	SRR12529266_823235||full	RVD	100	0.883843
RGVC31473	Sheep_Duodenum-4__c81662	SRR12529266_2314415||full	RVD	99.992	0.889468
RGVC31478	Sheep_Duodenum-4__c88390	SRR4435582_174066||full	RVD	96.104	0.888399
RGVC31478	Sheep_Duodenum-4__c88390	IMGVR_UViG_3300028797_000511|3300028797|Ga0265301_10001638	IMG/VR v4	94.98	0.888399
RGVC31492	Sheep_Duodenum-5__c106832	ERR3275108_1195984||full	RVD	92.726	0.755184
RGVC31521	Sheep_Duodenum-5__c138913	IMGVR_UViG_2690315773_000001|2690315773|2690320511|145247-154784	IMG/VR v4	100	0.960398
RGVC31530	Sheep_Duodenum-5__c146098	SRR12529265_1378665||full	RVD	99.993	0.998463
RGVC31553	Sheep_Duodenum-5__c171	SRR12529265_1639388||full	RVD	99.984	0.996087
RGVC31563	Sheep_Duodenum-5__c181	SRR12529265_1962017||full	RVD	99.984	0.977537
RGVC31600	Sheep_Duodenum-5__c214	SRR12529265_1127578||full	RVD	100	0.999597
RGVC31612	Sheep_Duodenum-5__c218438	SRR12529269_2139847||full	RVD	99.935	0.884433
RGVC31613	Sheep_Duodenum-5__c219681	SRR12529265_2234045||full	RVD	99.973	0.900296
RGVC31618	Sheep_Duodenum-5__c233	SRR12529265_1848486||full	RVD	99.977	0.982201
RGVC31620	Sheep_Duodenum-5__c236	ERR3201403_1109839||full	RVD	90.991	0.751968
RGVC31632	Sheep_Duodenum-5__c3042	SRR12529265_448474||full	RVD	99.992	0.761809
RGVC31645	Sheep_Duodenum-5__c42553	virsorter_curated_1029	PIGEON	97.776	0.957131
RGVC31645	Sheep_Duodenum-5__c42553	IMGVR_UViG_2540341026_000003|2540341026|2540344038|108441-152881	IMG/VR v4	99.95	0.953654
RGVC31682	Sheep_Duodenum-5__c82293	SRR873604_1871944||full	RVD	95.377	0.774742
RGVC31687	Sheep_Duodenum-5__c87078	SRR8387714_1080596||full	RVD	93.023	0.780935
RGVC31692	Sheep_Duodenum-5__c95	SRR12529265_2320750||full	RVD	99.987	0.847877
RGVC31704	Sheep_Ileum-1__c127	SRR12529269_238864||full	RVD	99.96	0.865051
RGVC31713	Sheep_Ileum-1__c14198	ERR3201393_1098190||full	RVD	96.725	0.872005
RGVC31721	Sheep_Ileum-1__c163191	SRR12529268_1426575||full	RVD	99.594	0.832423
RGVC31736	Sheep_Ileum-1__c186419	SRR12529269_1200517||full	RVD	100	0.837665
RGVC31738	Sheep_Ileum-1__c188989	SRR12529266_2357050||full	RVD	99.993	0.992598
RGVC31744	Sheep_Ileum-1__c196	SRR12529269_934570||full	RVD	100	0.770847
RGVC31764	Sheep_Ileum-1__c240497	SRR12529269_1165952||full	RVD	99.996	1
RGVC31766	Sheep_Ileum-1__c247785	SRR12529269_340178||full	RVD	100	1
RGVC31776	Sheep_Ileum-1__c33400	SRR12529269_717242||full	RVD	99.988	0.82072
RGVC31788	Sheep_Ileum-1__c44950	SRR12529269_2406017||full	RVD	99.985	0.93142
RGVC31791	Sheep_Ileum-1__c50906	ERR3224603_643989||full	RVD	98.4	0.912116
RGVC31823	Sheep_Ileum-2__c113976	SRR12529268_1381692||full	RVD	99.983	0.903263
RGVC31824	Sheep_Ileum-2__c1169	SRR12529268_1686072||full	RVD	99.975	0.998366
RGVC31828	Sheep_Ileum-2__c1316	SRR12529268_2031302||full	RVD	99.971	0.781452
RGVC31834	Sheep_Ileum-2__c153899	SRR12529269_372045||full	RVD	96.84	0.775409
RGVC31836	Sheep_Ileum-2__c157	SRR12529267_1721779||full	RVD	99.977	0.971258
RGVC31852	Sheep_Ileum-2__c526	SRR12529266_1101809||full	RVD	98.102	0.973478
RGVC31854	Sheep_Ileum-2__c60071	SRR8387717_1044744||full	RVD	99.909	0.822076
RGVC31855	Sheep_Ileum-2__c631	SRR12529268_78991||full	RVD	99.942	0.880526
RGVC31858	Sheep_Ileum-2__c680	SRR12529268_2009379||full	RVD	99.983	0.811061
RGVC31859	Sheep_Ileum-2__c685	SRR12529268_1344840||full	RVD	100	0.817703
RGVC31873	Sheep_Ileum-3__c111474	SRR12529267_1701216||full	RVD	99.993	0.990422
RGVC31881	Sheep_Ileum-3__c191060	SRR12529267_2156555||full	RVD	98.873	0.888308
RGVC31891	Sheep_Ileum-3__c27371	SRR12529267_2243002||full	RVD	99.971	0.758404
RGVC31895	Sheep_Ileum-3__c40303	SRR12529267_244937||full	RVD	99.832	0.95204
RGVC31896	Sheep_Ileum-3__c431	SRR12529267_201065||full	RVD	99.989	0.986283
RGVC31902	Sheep_Ileum-3__c63952	SRR12529267_1579443||full	RVD	100	0.993189
RGVC31913	Sheep_Ileum-4__c11	ERR3224600_161425||full	RVD	94.178	0.798242
RGVC31959	Sheep_Ileum-4__c2021	SRR12529266_1795656||full	RVD	99.988	0.994347
RGVC31997	Sheep_Ileum-4__c400	SRR12529266_1376772||full	RVD	99.769	0.825704
RGVC32047	Sheep_Ileum-4__c962	SRR12529266_1508632||full	RVD	100	0.829599
RGVC32062	Sheep_Ileum-5__c1273	SRR12529265_2081313||full_1	RVD	99.993	0.87757
RGVC32069	Sheep_Ileum-5__c13964	SRR12529265_2826259||full	RVD	99.946	0.91306
RGVC32079	Sheep_Ileum-5__c1735	SRR12529265_889063||full	RVD	100	0.99166
RGVC32080	Sheep_Ileum-5__c1741	SRR12529265_1031327||full	RVD	99.995	0.996558
RGVC32084	Sheep_Ileum-5__c19148	SRR12529265_1475761||full	RVD	99.852	0.885787
RGVC32121	Sheep_Ileum-5__c55237_1	SRR8387718_266367||full	RVD	97.987	0.826706
RGVC32127	Sheep_Ileum-5__c661	SRR12529265_2508080||full	RVD	99.994	0.9964
RGVC32163	Sheep_Jejunum-1__c1221	SRR12529268_2227782||full	RVD	99.864	0.991359
RGVC32196	Sheep_Jejunum-1__c1743	SRR8387717_381976||full	RVD	99.892	0.999112
RGVC32200	Sheep_Jejunum-1__c175877	SRR12529269_1783007||full	RVD	99.988	0.97692
RGVC32207	Sheep_Jejunum-1__c184280	SRR12529269_739486||full	RVD	99.987	1
RGVC32208	Sheep_Jejunum-1__c185073	SRR8387718_961249||full	RVD	97.705	0.894454
RGVC32231	Sheep_Jejunum-1__c229541	ERR3201418_658403||full	RVD	94.219	0.771778
RGVC32239	Sheep_Jejunum-1__c245499	ERR3201403_1278514||full	RVD	94.772	0.960444
RGVC32241	Sheep_Jejunum-1__c24946	SRR9651415_176917||full	RVD	97.645	0.805379
RGVC32264	Sheep_Jejunum-1__c280_1	SRR8387715_542596||full	RVD	99.014	0.901832
RGVC32264	Sheep_Jejunum-1__c280_1	IMGVR_UViG_3300037400_002226|3300037400|Ga0392372_0000867	IMG/VR v4	91.55	0.787845
RGVC32279	Sheep_Jejunum-1__c38802	SRR12529269_1038004||full	RVD	99.947	0.954048
RGVC32280	Sheep_Jejunum-1__c39786_1	IMGVR_UViG_643348510_000004|643348510|643348592|3472592-3489141	IMG/VR v4	99.76	0.978881
RGVC32292	Sheep_Jejunum-1__c471	SRR12529269_57135||full	RVD	99.996	0.794726
RGVC32315	Sheep_Jejunum-1__c659	SRR12529269_1858748||full	RVD	99.975	0.968105
RGVC32318	Sheep_Jejunum-1__c67338	SRR12529269_783406||full	RVD	99.972	0.758665
RGVC32321	Sheep_Jejunum-1__c687	SRR12529269_1547404||full	RVD	99.996	0.912101
RGVC32342	Sheep_Jejunum-1__c92596	SRR8387718_187107||full	RVD	99.756	0.993408
RGVC32354	Sheep_Jejunum-2__c1055	SRR12529268_852953||full	RVD	99.955	0.797777
RGVC32396	Sheep_Jejunum-2__c180627	SRR8387721_1026676||full	RVD	99.652	1
RGVC32426	Sheep_Jejunum-2__c255341	SRR12529268_603199||full	RVD	99.938	0.896141
RGVC32435	Sheep_Jejunum-2__c277992	SRR12529268_1438779||full	RVD	99.938	1
RGVC32444	Sheep_Jejunum-2__c299	SRR12529268_1685886||full	RVD	99.823	0.929134
RGVC32447	Sheep_Jejunum-2__c301812	SRR12529268_2134559||full	RVD	99.995	1
RGVC32489	Sheep_Jejunum-2__c458	SRR12529265_2697507||full	RVD	99.968	0.989036
RGVC32491	Sheep_Jejunum-2__c465	SRR12529269_238864||full	RVD	99.622	0.825791
RGVC32505	Sheep_Jejunum-2__c64	SRR12529268_255456||full	RVD	99.934	0.81087
RGVC32506	Sheep_Jejunum-2__c643_1	ERR4297092_2512||full	RVD	90.543	0.904047
RGVC32533	Sheep_Jejunum-3__c109728_1	SRR12529267_1524259||full	RVD	99.969	0.973146
RGVC32547	Sheep_Jejunum-3__c185	SRR12529267_1348540||full	RVD	99.986	0.95094
RGVC32559	Sheep_Jejunum-3__c288	SRR12529267_1919118||full	RVD	99.949	0.9936
RGVC32572	Sheep_Jejunum-3__c540	SRR12529267_2246906||full	RVD	100	0.959366
RGVC32582	Sheep_Jejunum-3__c7	SRR12529267_59394||full	RVD	100	0.781138
RGVC32595	Sheep_Jejunum-4__c1155	SRR12529266_1348175||full	RVD	99.974	0.818188
RGVC32623	Sheep_Jejunum-4__c317	SRR12529266_871978||full	RVD	99.993	0.966244
RGVC32624	Sheep_Jejunum-4__c320_1	SRR12529266_2447942||full_1	RVD	99.997	0.885593
RGVC32625	Sheep_Jejunum-4__c32184	SRR12529266_1291501||full	RVD	100	0.874664
RGVC32633	Sheep_Jejunum-4__c546	SRR12529267_2264708||full	RVD	99.981	0.841371
RGVC32636	Sheep_Jejunum-4__c58203	SRR12529267_309594||full	RVD	99.784	0.773714
RGVC32643	Sheep_Jejunum-4__c70444	SRR12529266_1306501||full	RVD	99.979	0.984331
RGVC32651	Sheep_Jejunum-5__c100017	SRR12529265_1938152||full	RVD	100	0.979857
RGVC32667	Sheep_Jejunum-5__c175	SRR12529265_2695507||full	RVD	99.941	0.992858
RGVC32669	Sheep_Jejunum-5__c179077	SRR873607_1994288||full	RVD	90.767	0.796506
RGVC32676	Sheep_Jejunum-5__c29982	SRR12529265_170603||full	RVD	99.993	0.986307
RGVC32681	Sheep_Jejunum-5__c394	SRR12529265_875578||full_1	RVD	99.994	0.945255
RGVC32682	Sheep_Jejunum-5__c395	SRR12529265_454296||full	RVD	99.954	0.974399
RGVC32689	Sheep_Jejunum-5__c64941	SRR12529266_619444||full	RVD	99.116	0.798579
RGVC32695	Sheep_Jejunum-5__c719	SRR12529265_757798||full	RVD	99.876	0.827109
RGVC32698	Sheep_Jejunum-5__c899	SRR12529269_850248||full	RVD	99.862	0.926173
RGVC32700	Sheep_Jejunum-5__c904	SRR12529265_244178||full	RVD	99.996	0.846854
RGVC32703	Sheep_Omasum-1__c1001426_1	SRR12529269_2106262||full_1	RVD	99.997	0.802963
RGVC32704	Sheep_Omasum-1__c103468	SRR12529269_1764652||full	RVD	100	0.989525
RGVC32705	Sheep_Omasum-1__c1038589	SRR12529269_337570||full	RVD	99.984	0.995364
RGVC32709	Sheep_Omasum-1__c184_1	SRR12529269_159526||full_1	RVD	100	0.830408
RGVC32713	Sheep_Omasum-1__c239186	SRR12529269_403991||full	RVD	99.992	0.859264
RGVC32715	Sheep_Omasum-1__c263992_1	SRR12529269_379546||full_1	RVD	99.995	0.984016
RGVC32716	Sheep_Omasum-1__c274664	ERR3224603_697404||full	RVD	98.381	0.949013
RGVC32726	Sheep_Omasum-1__c475609	SRR12529269_2166936||full	RVD	99.989	0.80468
RGVC32729	Sheep_Omasum-1__c482301	SRR12529269_10063||full	RVD	99.998	0.81515
RGVC32730	Sheep_Omasum-1__c487678	SRR12529269_2142774||full	RVD	99.997	0.934454
RGVC32733	Sheep_Omasum-1__c494670	SRR12529269_2149520||full	RVD	100	0.765989
RGVC32735	Sheep_Omasum-1__c499	SRR12529269_1308821||full_1	RVD	99.998	0.773658
RGVC32739	Sheep_Omasum-1__c623377	SRR12529269_288710||full	RVD	99.982	1
RGVC32745	Sheep_Omasum-1__c789314_1	SRR12529269_663248||full	RVD	99.993	0.999591
RGVC32747	Sheep_Omasum-1__c800891	SRR8387717_373299||full	RVD	99.216	0.81977
RGVC32749	Sheep_Omasum-1__c8473	SRR12529269_490694||full	RVD	99.98	0.933717
RGVC32751	Sheep_Omasum-1__c891590	SRR12529269_612417||full	RVD	99.994	0.998829
RGVC32753	Sheep_Omasum-1__c93675_1	SRR12529269_1208892||full	RVD	99.945	0.996655
RGVC32754	Sheep_Omasum-1__c947721	SRR12529269_1970094||full	RVD	99.981	0.757379
RGVC32757	Sheep_Omasum-1__c963526	SRR12529269_610391||full	RVD	99.983	1
RGVC32759	Sheep_Omasum-1__c999184	SRR12529269_757390||full	RVD	99.976	0.980786
RGVC32774	Sheep_Omasum-2__c14786	SRR12529268_2481414||full	RVD	99.955	0.986867
RGVC32784	Sheep_Omasum-2__c378783	SRR12529268_653810||full	RVD	99.903	0.851944
RGVC32787	Sheep_Omasum-2__c385174	SRR12529268_2454779||full	RVD	100	0.988071
RGVC32788	Sheep_Omasum-2__c387551	SRR12529268_1944396||full	RVD	99.951	0.927047
RGVC32790	Sheep_Omasum-2__c3911	SRR12529267_1173598||0_partial_1	RVD	99.994	0.960246
RGVC32795	Sheep_Omasum-2__c399021	SRR12529268_375994||full	RVD	99.979	0.888927
RGVC32798	Sheep_Omasum-2__c409517	SRR12529268_2249497||full	RVD	99.969	0.946862
RGVC32799	Sheep_Omasum-2__c410974	SRR12529268_2251956||full	RVD	99.911	0.751382
RGVC32810	Sheep_Omasum-2__c61_1	SRR12529268_792548||full_1	RVD	100	1
RGVC32811	Sheep_Omasum-2__c617838	SRR12529268_1941130||full	RVD	99.662	0.891145
RGVC32813	Sheep_Omasum-2__c63775	SRR12529268_2357531||full	RVD	99.991	0.999931
RGVC32814	Sheep_Omasum-2__c641121	SRR12529268_380814||full	RVD	99.986	0.762264
RGVC32815	Sheep_Omasum-2__c668415	SRR8387718_1219483||full	RVD	99.575	0.865182
RGVC32817	Sheep_Omasum-2__c678487	SRR12529268_2262647||full	RVD	99.992	0.879967
RGVC32822	Sheep_Omasum-2__c713516	SRR12529268_456361||full	RVD	99.991	0.909426
RGVC32826	Sheep_Omasum-2__c741611	SRR12529268_394585||full	RVD	99.832	0.818333
RGVC32828	Sheep_Omasum-2__c767537	SRR12529268_2045720||full_1	RVD	99.99	0.925049
RGVC32829	Sheep_Omasum-2__c771761	SRR12529268_355463||full	RVD	99.663	1
RGVC32832	Sheep_Omasum-2__c808289	SRR11784281_257979||full	RVD	96.694	0.794589
RGVC32833	Sheep_Omasum-2__c809766	SRR12529268_329655||full	RVD	99.996	0.81352
RGVC32836	Sheep_Omasum-2__c824659	SRR12529268_1021714||full	RVD	99.99	0.91543
RGVC32838	Sheep_Omasum-2__c864826_1	SRR12529268_2145620||full_1	RVD	100	0.918054
RGVC32843	Sheep_Omasum-2__c950897	SRR12529268_1106465||full	RVD	99.988	0.954851
RGVC32857	Sheep_Omasum-3__c336060	SRR12529267_2260439||full	RVD	99.99	0.77356
RGVC32858	Sheep_Omasum-3__c344133	SRR12529267_484133||full	RVD	100	0.88616
RGVC32860	Sheep_Omasum-3__c347306	SRR12529267_787201||full_1	RVD	99.992	0.846587
RGVC32864	Sheep_Omasum-3__c393814	SRR12529266_1407683||full_1	RVD	99.664	0.85434
RGVC32867	Sheep_Omasum-3__c447198	SRR12529267_2150859||full	RVD	99.988	0.999297
RGVC32874	Sheep_Omasum-3__c644252	SRR12529267_2103981||full	RVD	99.988	0.994915
RGVC32876	Sheep_Omasum-3__c683424	SRR12529267_2279848||full	RVD	99.998	0.908689
RGVC32879	Sheep_Omasum-3__c731665	SRR12529267_1964977||full	RVD	99.933	0.842356
RGVC32880	Sheep_Omasum-3__c739163_1	SRR12529267_12738||full_1	RVD	99.99	0.990972
RGVC32888	Sheep_Omasum-4__c1093986	SRR12529266_2247854||full	RVD	99.991	0.816445
RGVC32895	Sheep_Omasum-4__c215054	SRR8387717_897735||full	RVD	99.996	1
RGVC32902	Sheep_Omasum-4__c34346_1	SRR12529266_119670||full	RVD	99.963	0.968359
RGVC32905	Sheep_Omasum-4__c46005_1	SRR12529265_1056237||0_partial_1	RVD	99.998	0.978705
[truncated: 2,770 more rows]
