# Supplementary material for: Spatial heterogeneity of viral communities across the gastrointestinal tracts of ruminants
Source: Research Square preprint supplement (doi:10.21203/rs.3.rs-4244627/v1), 2024-04-10
Supplement: Supplementary file 6 [file 323af7b7913286479a83f683.xlsx]

## Sheet: Table S1
Table S1. Number of viral contigs identificated by various methods from short- and long-read sequencing
Methods	IMG/VR v3	DeepVirFinder	VirFinder	Virsorter2	VIBRANT	ALL
Illumina	587	651364	310787	518460	331127	1042515
HiFi	1915	51004	24795	72700	46524	95419
Nanopore	272	11577	5746	6517	2876	19052
All	2774	713945	341328	597677	380527	1156986

## Sheet: Table S2
Table S2. Distribution of estimated viral genome completeness from short- and long-read sequencing
Completeness (%)	Sequencing Methods
	Illumina	HiFi	Nanopore
50-90	30420	13917	1509
90-100	16208	13243	649
100	8636	937	2
