# Supplementary material for: Spatial heterogeneity of viral communities across the gastrointestinal tracts of ruminants
Source: Research Square preprint supplement (doi:10.21203/rs.3.rs-4244627/v1), 2024-04-10
Supplement: Supplementary file 7 [file 50b2e6c80b10d42c8803f2a6.xlsx]

## Sheet: Table S14
Table S14. The presence of multiple functional genes in predicted host MAGs
Pathway	Alphaproteobacteria	Bacilli	Bacteroidia	Clostridia	Kiritimatiellae	Negativicutes	Saccharimonadia	Spirochaetia	Synergistia	Methanobacteria	Methanomicrobia	Thermoplasmata
Agarose	0.015873	0.0409836	0.0609756	0.0775339	0.530612	0	0	0	0	0	0	0
Cell Wall	1	0.803279	0.997131	0.851938	0.77551	0.969231	0.445312	0.966102	1	0.224138	0.166667	0.166667
Cellulose	0.047619	0.413934	0.812769	0.63802	0.816327	0.461538	0.117188	0.745763	0.508772	0.0862069	0	0.0833333
Chitin	0.0555556	0.0163934	0.0394548	0.00467071	0	0	0	0.0677966	0	0.0172414	0	0
Fructan	0.00793651	0.180328	0.378766	0.36525	0.204082	0.461538	0	0.186441	0	0	0	0.0833333
Glucan	0.0238095	0.0122951	0.253228	0.0401681	0.367347	0	0	0.0847458	0	0	0	0
Hemicellulose	0.444444	0.872951	0.991392	0.946754	1	0.8	0.289062	1	0.912281	0.103448	0.0833333	0.25
Host Glycans	0.015873	0.139344	0.727403	0.6539	1	0.846154	0.0234375	0.830508	0	0.0517241	0	0.0833333
Pectin	0.031746	0.241803	0.840029	0.649696	0.816327	0.0923077	0	0.542373	0.403509	0	0.0833333	0.0833333
Sialic acid	0	0.0122951	0.533716	0.220458	0.918367	0.292308	0.0078125	0.220339	0	0	0	0
Starch	0.373016	0.622951	0.98924	0.947221	1	0.876923	0.921875	1	1	0.206897	0	0
Amino Acid Metabolism	1	1	1	1	1	1	1	1	1	1	1	1
Hydrogen Metabolism	0.253968	0.348361	0.243902	0.832321	0.510204	0.953846	0.0078125	0.813559	0.877193	1	1	0.75
Methanogenesis	0.015873	0.00819672	0.00143472	0.00280243	0	0	0	0	0	1	1	0.75
