# Supplementary material for: Spatial heterogeneity of viral communities across the gastrointestinal tracts of ruminants
Source: Research Square preprint supplement (doi:10.21203/rs.3.rs-4244627/v1), 2024-04-10
Supplement: Supplementary file 8 [file 51ca64b0d372ac083e1222ca.xlsx]

## Sheet: Table S12
Table S12. Summary of Virus–host Linkages
vOTU	Host MAGs	MAG Origin	Methods	Domain	Phylum	Class	Order	Family	Genus	Species
RGVC1	RUG14536	Rumen Superset	tRNA	Bacteria	Firmicutes	Bacilli	RFN20	CAG-826	UBA2450	UBA2450 sp902800025
RGVC2	RGIG2177	Illumina Sequencing	tRNA	Bacteria	Firmicutes_A	Clostridia	Lachnospirales	Anaerotignaceae	SIG274
RGVC2	RGIG5631	Illumina Sequencing	tRNA	Bacteria	Firmicutes_A	Clostridia	Lachnospirales	Anaerotignaceae	RGIG5631	RGIG5631 sp017534115
RGVC2	RGIG6302	Illumina Sequencing	tRNA	Bacteria	Firmicutes_A	Clostridia	Lachnospirales	Anaerotignaceae	Anaerotignum	Anaerotignum sp017442465
RGVC2	RGIG8065	Illumina Sequencing	tRNA	Archaea	Thermoplasmatota	Thermoplasmata	Methanomassiliicoccales	Methanomethylophilaceae	UBA71	UBA71 sp016282555
RGVC2	RUG12122	Rumen Superset	tRNA	Bacteria	Firmicutes_A	Clostridia	Lachnospirales	Lachnospiraceae	UBA2882	UBA2882 sp900317505
RGVC2	RUG12885	Rumen Superset	tRNA	Bacteria	Firmicutes_A	Clostridia	Lachnospirales	UBA1390	RUG760	RUG760 sp902783575
RGVC2	RUG14402	Rumen Superset	tRNA	Bacteria	Firmicutes_A	Clostridia	Oscillospirales	Acutalibacteraceae	Ruminococcus_E	Ruminococcus_E sp902798755
RGVC5	RGIG1914	Illumina Sequencing	tRNA	Bacteria	Firmicutes_A	Clostridia	Christensenellales	CAG-74	RUG11247
RGVC5	RGIG4602	Illumina Sequencing	tRNA	Bacteria	Firmicutes_A	Clostridia	Christensenellales	CAG-74	Limiplasma	Limiplasma sp017473345
RGVC5	RGIG6256	Illumina Sequencing	tRNA	Bacteria	Firmicutes_A	Clostridia	Christensenellales	CAG-74	Limiplasma	Limiplasma sp017516765
RGVC5	RGIG7448	Illumina Sequencing	tRNA	Bacteria	Firmicutes_A	Clostridia	Christensenellales	CAG-74	SFMI01	SFMI01 sp017549335
RGVC7	RGIG1827	Illumina Sequencing	tRNA	Bacteria	Firmicutes_A	Clostridia	Christensenellales	CAG-74	RUG563	RUG563 sp017397895
RGVC8	RUG14926	Rumen Superset	tRNA	Bacteria	Firmicutes_A	Clostridia	Oscillospirales	Ruminococcaceae	Ruminococcus	Ruminococcus flavefaciens_R
RGVC13	RGIG8714	Illumina Sequencing	tRNA	Bacteria	Firmicutes_A	Clostridia	Christensenellales	UBA1242	UBA7867	UBA7867 sp017622115
RGVC14	RGIG6465	Illumina Sequencing	tRNA	Bacteria	Verrucomicrobiota	Lentisphaeria	Victivallales	UBA1829	SIG77
RGVC16	RGIG3845	Illumina Sequencing	tRNA	Bacteria	Proteobacteria	Alphaproteobacteria	RF32	CAG-239	CAZU01	CAZU01 sp017457005
RGVC16	RGIG4793	Illumina Sequencing	tRNA	Bacteria	Proteobacteria	Alphaproteobacteria	RF32	CAG-239	Scatocola	Scatocola sp017467515
RGVC17	RGIG2850	Illumina Sequencing	tRNA	Bacteria	Firmicutes_A	Clostridia	Oscillospirales	Acutalibacteraceae	CAG-177	CAG-177 sp016280595
RGVC22	RGIG1833	Illumina Sequencing	tRNA	Bacteria	Firmicutes_A	Clostridia	Oscillospirales	Oscillospiraceae	Lawsonibacter	Lawsonibacter sp017397835
RGVC22	RGIG5427	Illumina Sequencing	tRNA	Bacteria	Firmicutes_A	Clostridia	Oscillospirales	Oscillospiraceae	Lawsonibacter	Lawsonibacter sp017502285
RGVC22	RGIG8567	Illumina Sequencing	tRNA	Bacteria	Firmicutes_A	Clostridia	Oscillospirales	Oscillospiraceae	Lawsonibacter	Lawsonibacter sp017624915
RGVC22	RUG13887	Rumen Superset	tRNA	Bacteria	Firmicutes_A	Clostridia	Oscillospirales	Acutalibacteraceae	Fimenecus	Fimenecus sp900315985
RGVC29	RGIG6437	Illumina Sequencing	tRNA	Bacteria	Firmicutes_A	Clostridia	Oscillospirales	QAMX01	RGIG1911	RGIG1911 sp017533425
RGVC29	RUG11891	Rumen Superset	tRNA	Bacteria	Firmicutes_A	Clostridia	Oscillospirales	Oscillospiraceae	Evtepia	Evtepia sp902781745
RGVC29	RUG13604	Rumen Superset	tRNA	Bacteria	Firmicutes_A	Clostridia	Oscillospirales	Oscillospiraceae	Evtepia	Evtepia sp902781745
RGVC30	RGIG1712	Illumina Sequencing	tRNA	Bacteria	Firmicutes_A	Clostridia	Lachnospirales	Lachnospiraceae	Faecalimonas	Faecalimonas sp017416155
RGVC31	RGIG7436	Illumina Sequencing	tRNA	Bacteria	Firmicutes_A	Clostridia	UMGS1810	UMGS1810	RGIG1828
RGVC31	RGIG9907	Illumina Sequencing	tRNA	Bacteria	Firmicutes_A	Clostridia	Monoglobales	Firm-18	RGIG1864	RGIG1864 sp017646825
RGVC32	RGIG7373	Illumina Sequencing	tRNA	Bacteria	Firmicutes_A	Clostridia	Oscillospirales	Acutalibacteraceae	Fimenecus	Fimenecus sp017546665
RGVC36	RGIG9916	Illumina Sequencing	tRNA	Bacteria	Bacteroidota	Bacteroidia	Bacteroidales	Rikenellaceae	Alistipes	Alistipes sp017631285
RGVC37	RGIG5454	Illumina Sequencing	tRNA	Bacteria	Firmicutes_A	Clostridia	Oscillospirales	CAG-382	SFLA01	SFLA01 sp017399965
RGVC37	RGIG8300	Illumina Sequencing	tRNA	Bacteria	Firmicutes_A	Clostridia	Oscillospirales	UBA644	HGM12619
RGVC37	RUG12488	Rumen Superset	tRNA	Bacteria	Firmicutes_A	Clostridia	Oscillospirales	Acutalibacteraceae	RUG592	RUG592 sp902779615
RGVC37	RUG12696	Rumen Superset	tRNA	Bacteria	Firmicutes_A	Clostridia	Oscillospirales	CAG-272	UBA1248	UBA1248 sp902762505
RGVC39	RGIG2945	Illumina Sequencing	tRNA	Bacteria	Firmicutes_A	Clostridia	Oscillospirales	Acutalibacteraceae	RGIG2945	RGIG2945 sp017442445
RGVC39	RGIG7263	Illumina Sequencing	tRNA	Bacteria	Firmicutes_A	Clostridia	UBA1381	UBA9506	UBA9506
RGVC39	RGIG9062	Illumina Sequencing	tRNA	Bacteria	Firmicutes_A	Clostridia	Oscillospirales	Acutalibacteraceae	CAG-488	CAG-488 sp017936645
RGVC40	RGIG9475	Illumina Sequencing	tRNA	Bacteria	Firmicutes_A	Clostridia	Oscillospirales	Oscillospiraceae	Faecousia	Faecousia sp017630495
RGVC40	RUG10824	Rumen Superset	tRNA	Bacteria	Firmicutes_A	Clostridia	Oscillospirales	Oscillospiraceae	Evtepia	Evtepia sp902781745
RGVC42	RGIG1015	Illumina Sequencing	tRNA	Bacteria	Firmicutes_A	Clostridia	Oscillospirales	Acutalibacteraceae	UBA737	UBA737 sp017423885
RGVC42	RUG10806	Rumen Superset	tRNA	Bacteria	Firmicutes_A	Clostridia	Oscillospirales	Acutalibacteraceae	UBA737	UBA737 sp902762875
RGVC42	RUG11203	Rumen Superset	tRNA	Bacteria	Firmicutes_A	Clostridia	Oscillospirales	Acutalibacteraceae	UBA737	UBA737 sp902766855
RGVC42	RUG12134	Rumen Superset	tRNA	Bacteria	Firmicutes_A	Clostridia	Oscillospirales	Acutalibacteraceae	UBA737	UBA737 sp900754145
RGVC42	RUG13642	Rumen Superset	tRNA	Bacteria	Firmicutes_A	Clostridia	Oscillospirales	Acutalibacteraceae	UBA737	UBA737 sp002431945
RGVC42	RUG14662	Rumen Superset	tRNA	Bacteria	Firmicutes_A	Clostridia	Oscillospirales	Acutalibacteraceae	RUG592	RUG592 sp902801245
RGVC42	RUG14768	Rumen Superset	tRNA	Bacteria	Firmicutes_A	Clostridia	Oscillospirales	Acutalibacteraceae	UBA737	UBA737 sp902802375
RGVC42	RUG14874	Rumen Superset	tRNA	Bacteria	Firmicutes_A	Clostridia	Oscillospirales	Acutalibacteraceae	UBA1213	UBA1213 sp900319255
RGVC45	RGIG233	Illumina Sequencing	tRNA	Bacteria	Firmicutes_A	Clostridia	Lachnospirales	Lachnospiraceae	Copromonas	Copromonas sp017380975
RGVC45	RGIG353	Illumina Sequencing	tRNA	Bacteria	Firmicutes_A	Clostridia	Lachnospirales	Lachnospiraceae	Copromonas	Copromonas sp017380975
RGVC45	RGIG4327	Illumina Sequencing	tRNA	Bacteria	Firmicutes_A	Clostridia	Lachnospirales	Lachnospiraceae	CAG-632	CAG-632 sp017460485
RGVC45	RGIG8075	Illumina Sequencing	tRNA	Bacteria	Firmicutes_A	Clostridia	Lachnospirales	Lachnospiraceae	UBA3766
RGVC45	RUG10801	Rumen Superset	tRNA	Bacteria	Firmicutes_A	Clostridia	Lachnospirales	Lachnospiraceae	Agathobacter	Agathobacter faecis
RGVC45	RUG13445	Rumen Superset	tRNA	Bacteria	Firmicutes_A	Clostridia	Lachnospirales	Lachnospiraceae	CAG-791	CAG-791 sp900318875
RGVC45	RUG14809	Rumen Superset	tRNA	Bacteria	Firmicutes_A	Clostridia	Oscillospirales	Oscillospiraceae	Limivicinus	Limivicinus sp900321275
RGVC46	RGIG4210	Illumina Sequencing	tRNA	Bacteria	Firmicutes_A	Clostridia	Christensenellales	UBA1242	Caccovivens
RGVC46	RGIG9905	Illumina Sequencing	tRNA	Archaea	Methanobacteriota	Methanobacteria	Methanobacteriales	Methanobacteriaceae	Methanobrevibacter	Methanobrevibacter sp017646885
RGVC48	RUG13886	Rumen Superset	tRNA	Bacteria	Firmicutes_A	Clostridia	Oscillospirales	Ruminococcaceae	Ruminococcus	Ruminococcus flavefaciens_B
RGVC49	RGIG5427	Illumina Sequencing	tRNA	Bacteria	Firmicutes_A	Clostridia	Oscillospirales	Oscillospiraceae	Lawsonibacter	Lawsonibacter sp017502285
RGVC49	RUG14926	Rumen Superset	tRNA	Bacteria	Firmicutes_A	Clostridia	Oscillospirales	Ruminococcaceae	Ruminococcus	Ruminococcus flavefaciens_R
RGVC51	RGIG4670	Illumina Sequencing	tRNA	Bacteria	Firmicutes_A	Clostridia	Oscillospirales	Oscillospiraceae	Faecousia
RGVC51	RGIG6289	Illumina Sequencing	tRNA	Bacteria	Firmicutes_A	Clostridia	Oscillospirales	Oscillospiraceae	Faecousia	Faecousia sp017521485
RGVC51	RGIG7290	Illumina Sequencing	tRNA	Bacteria	Firmicutes_A	Clostridia	Oscillospirales	Ruminococcaceae	UMGS1668	UMGS1668 sp017547705
RGVC51	RGIG7305	Illumina Sequencing	tRNA	Bacteria	Firmicutes_A	Clostridia	Oscillospirales	Oscillospiraceae	Faecousia	Faecousia sp017547505
RGVC51	RGIG7498	Illumina Sequencing	tRNA	Bacteria	Firmicutes_A	Clostridia	Oscillospirales	Oscillospiraceae	Faecousia
RGVC51	RGIG8578	Illumina Sequencing	tRNA	Bacteria	Firmicutes_A	Clostridia	Oscillospirales	Oscillospiraceae	Faecousia	Faecousia sp017624715
RGVC51	RGIG8706	Illumina Sequencing	tRNA	Archaea	Halobacteriota	Methanomicrobia	Methanomicrobiales	Methanocorpusculaceae	Methanocorpusculum	Methanocorpusculum sp017622255
RGVC51	RGIG9455	Illumina Sequencing	tRNA	Bacteria	Firmicutes_A	Clostridia	Oscillospirales	Oscillospiraceae	Faecousia
RGVC52	RGIG4188	Illumina Sequencing	tRNA	Bacteria	Bacteroidota	Bacteroidia	Bacteroidales	Bacteroidaceae	Phocaeicola
RGVC52	RGIG4193	Illumina Sequencing	tRNA	Bacteria	Bacteroidota	Bacteroidia	Bacteroidales	Bacteroidaceae	Phocaeicola_A	Phocaeicola_A sp017516265
RGVC53	RGIG3005	Illumina Sequencing	tRNA	Bacteria	Firmicutes_A	Clostridia	Oscillospirales	Ruminococcaceae	UBA3855	UBA3855 sp015066665
RGVC53	RGIG7290	Illumina Sequencing	tRNA	Bacteria	Firmicutes_A	Clostridia	Oscillospirales	Ruminococcaceae	UMGS1668	UMGS1668 sp017547705
RGVC53	RGIG8578	Illumina Sequencing	tRNA	Bacteria	Firmicutes_A	Clostridia	Oscillospirales	Oscillospiraceae	Faecousia	Faecousia sp017624715
RGVC53	RGIG8958	Illumina Sequencing	tRNA	Bacteria	Firmicutes_A	Clostridia	Oscillospirales	Oscillospiraceae	Avoscillospira	Avoscillospira sp017938625
RGVC53	RUG10239	Rumen Superset	tRNA	Bacteria	Firmicutes_A	Clostridia	Oscillospirales	Acutalibacteraceae	Fimenecus	Fimenecus sp900315985
RGVC53	RUG13015	Rumen Superset	tRNA	Bacteria	Firmicutes_A	Clostridia	Oscillospirales	Oscillospiraceae	Faecousia	Faecousia sp900315595
RGVC53	RUG13585	Rumen Superset	tRNA	Bacteria	Firmicutes_A	Clostridia	Oscillospirales	Oscillospiraceae	Faecousia	Faecousia sp900315595
RGVC53	RUG14042	Rumen Superset	tRNA	Bacteria	Firmicutes_A	Clostridia	Oscillospirales	Oscillospiraceae	Limivicinus
RGVC56	HUN_Butyrivibrio_sp_AE3003	Rumen Superset	tRNA	Bacteria	Firmicutes_A	Clostridia	Lachnospirales	Lachnospiraceae	Butyrivibrio	Butyrivibrio hungatei_A
RGVC56	HUN_Faecalicatena_orotica_strain_NLAE_zl_C242_Ga0104394_101	Rumen Superset	tRNA	Bacteria	Firmicutes_A	Clostridia	Lachnospirales	Lachnospiraceae	Muricomes	Muricomes oroticus
RGVC56	RGIG1259	Illumina Sequencing	tRNA	Bacteria	Firmicutes_A	Clostridia	Lachnospirales	Lachnospiraceae	UBA1267	UBA1267 sp002308115
RGVC56	RGIG4190	Illumina Sequencing	tRNA	Bacteria	Firmicutes_A	Clostridia	Lachnospirales	Lachnospiraceae	UBA3766
RGVC56	RGIG6149	Illumina Sequencing	tRNA	Bacteria	Firmicutes_A	Clostridia	Lachnospirales	Lachnospiraceae	Agathobacter	Agathobacter sp017523185
RGVC56	RGIG7456	Illumina Sequencing	tRNA	Bacteria	Firmicutes_A	Clostridia	Lachnospirales	Lachnospiraceae	Roseburia	Roseburia sp017549185
RGVC56	RGIG7973	Illumina Sequencing	tRNA	Bacteria	Firmicutes_A	Clostridia	Lachnospirales	Lachnospiraceae	UBA1201	UBA1201 sp017550425
RGVC56	RUG11188	Rumen Superset	tRNA	Bacteria	Firmicutes_A	Clostridia	Lachnospirales	Lachnospiraceae	Eubacterium_G	Eubacterium_G sp902766735
RGVC56	RUG11226	Rumen Superset	tRNA	Bacteria	Firmicutes_A	Clostridia	Lachnospirales	Lachnospiraceae	V9D3004	V9D3004 sp002349525
RGVC56	RUG11237	Rumen Superset	tRNA	Bacteria	Firmicutes_A	Clostridia	Lachnospirales	Lachnospiraceae	RUG11237	RUG11237 sp902767135
RGVC56	RUG13871	Rumen Superset	tRNA	Bacteria	Firmicutes_A	Clostridia	Lachnospirales	Lachnospiraceae	Acetatifactor	Acetatifactor sp900320485
RGVC56	RUG14197	Rumen Superset	tRNA	Bacteria	Firmicutes_A	Clostridia	Lachnospirales	Lachnospiraceae	Lachnospira	Lachnospira eligens_A
RGVC56	RUG14439	Rumen Superset	tRNA	Bacteria	Firmicutes_A	Clostridia	Lachnospirales	Lachnospiraceae	Porcincola	Porcincola sp902799015
RGVC56	RUG14809	Rumen Superset	tRNA	Bacteria	Firmicutes_A	Clostridia	Oscillospirales	Oscillospiraceae	Limivicinus	Limivicinus sp900321275
RGVC56	RUG14938	Rumen Superset	tRNA	Bacteria	Firmicutes_A	Clostridia	Lachnospirales	Lachnospiraceae	RUG147	RUG147 sp900315495
RGVC57	RGIG3985	Illumina Sequencing	tRNA	Bacteria	Firmicutes_A	Clostridia	Oscillospirales	Oscillospiraceae	Faecousia
RGVC59	RGIG423	Illumina Sequencing	tRNA	Bacteria	Firmicutes_A	Clostridia	Lachnospirales	Lachnospiraceae	RGIG423	RGIG423 sp017387285
RGVC62	RGIG3990	Illumina Sequencing	tRNA	Bacteria	Firmicutes_A	Clostridia	Oscillospirales	Ruminococcaceae	JAAZZIT01	JAAZZIT01 sp017451665
RGVC62	RGIG4027	Illumina Sequencing	tRNA	Bacteria	Firmicutes_A	Clostridia	Oscillospirales	Acutalibacteraceae	SIG587	SIG587 sp017463345
RGVC62	RGIG4766	Illumina Sequencing	tRNA	Bacteria	Firmicutes_A	Clostridia	Oscillospirales	Acutalibacteraceae	UBA5905	UBA5905 sp017471765
RGVC62	RGIG8652	Illumina Sequencing	tRNA	Bacteria	Firmicutes_A	Clostridia	Oscillospirales	Acutalibacteraceae	UBA737	UBA737 sp017623315
RGVC62	RUG12659	Rumen Superset	tRNA	Bacteria	Firmicutes_A	Clostridia	Oscillospirales	Acutalibacteraceae	RUG11462	RUG11462 sp902781345
RGVC62	RUG13642	Rumen Superset	tRNA	Bacteria	Firmicutes_A	Clostridia	Oscillospirales	Acutalibacteraceae	UBA737	UBA737 sp002431945
RGVC62	RUG14768	Rumen Superset	tRNA	Bacteria	Firmicutes_A	Clostridia	Oscillospirales	Acutalibacteraceae	UBA737	UBA737 sp902802375
RGVC62	RUG14822	Rumen Superset	tRNA	Bacteria	Firmicutes_A	Clostridia	Oscillospirales	Acutalibacteraceae	UBA1213	UBA1213 sp902802985
RGVC64	RGIG1914	Illumina Sequencing	tRNA	Bacteria	Firmicutes_A	Clostridia	Christensenellales	CAG-74	RUG11247
RGVC64	RGIG4602	Illumina Sequencing	tRNA	Bacteria	Firmicutes_A	Clostridia	Christensenellales	CAG-74	Limiplasma	Limiplasma sp017473345
RGVC64	RGIG6256	Illumina Sequencing	tRNA	Bacteria	Firmicutes_A	Clostridia	Christensenellales	CAG-74	Limiplasma	Limiplasma sp017516765
RGVC64	RGIG7448	Illumina Sequencing	tRNA	Bacteria	Firmicutes_A	Clostridia	Christensenellales	CAG-74	SFMI01	SFMI01 sp017549335
RGVC64	RGIG8959	Illumina Sequencing	tRNA	Bacteria	Firmicutes_A	Clostridia	Christensenellales	CAG-74	Limiplasma	Limiplasma sp017938645
RGVC64	RUG10690	Rumen Superset	tRNA	Bacteria	Firmicutes_A	Clostridia	Christensenellales	CAG-74	RUG563	RUG563 sp902761755
RGVC64	RUG11181	Rumen Superset	tRNA	Bacteria	Firmicutes_A	Clostridia	Lachnospirales	Lachnospiraceae	Porcincola
RGVC64	RUG14431	Rumen Superset	tRNA	Bacteria	Firmicutes_A	Clostridia	Christensenellales	CAG-74	UBA2862	UBA2862 sp902799045
RGVC65	RGIG7306	Illumina Sequencing	tRNA	Bacteria	Firmicutes_A	Clostridia	Oscillospirales	Butyricicoccaceae	UBA4644	UBA4644 sp017559995
RGVC65	RGIG7455	Illumina Sequencing	tRNA	Bacteria	Firmicutes_A	Clostridia	Oscillospirales	Butyricicoccaceae	UBA4644
RGVC65	RGIG8983	Illumina Sequencing	tRNA	Bacteria	Firmicutes_A	Clostridia	Oscillospirales	Butyricicoccaceae	UBA4644	UBA4644 sp017620505
RGVC66	RUG13751	Rumen Superset	tRNA	Bacteria	Firmicutes_A	Clostridia	Oscillospirales	Oscillospiraceae	Faecousia	Faecousia sp900316335
RGVC66	RUG14158	Rumen Superset	tRNA	Bacteria	Firmicutes_A	Clostridia	Oscillospirales	Oscillospiraceae	CAG-170	CAG-170 sp902796245
RGVC74	RGIG4014	Illumina Sequencing	tRNA	Bacteria	Firmicutes_A	Clostridia	Lachnospirales	Lachnospiraceae	CAG-510
RGVC74	RGIG8142	Illumina Sequencing	tRNA	Bacteria	Firmicutes_A	Clostridia	Lachnospirales	Lachnospiraceae	ISDg	ISDg sp017546025
RGVC74	RUG10801	Rumen Superset	tRNA	Bacteria	Firmicutes_A	Clostridia	Lachnospirales	Lachnospiraceae	Agathobacter	Agathobacter faecis
RGVC74	RUG11892	Rumen Superset	tRNA	Bacteria	Firmicutes_A	Clostridia	Lachnospirales	Lachnospiraceae	UBA2821	UBA2821 sp002351535
RGVC74	RUG13801	Rumen Superset	tRNA	Bacteria	Firmicutes_A	Clostridia	Lachnospirales	Lachnospiraceae	ISDg	ISDg sp902787715
RGVC74	RUG14451	Rumen Superset	tRNA	Bacteria	Firmicutes_A	Clostridia	Lachnospirales	Lachnospiraceae	UBA1066	UBA1066 sp900314565
RGVC75	RGIG5449	Illumina Sequencing	tRNA	Bacteria	Firmicutes_A	Clostridia	Oscillospirales	Acutalibacteraceae	DTU089	DTU089 sp017501865
RGVC75	goat-flye.concoct.004_sub.contigs	HiFi Sequencing	tRNA	Bacteria	Firmicutes_A	Clostridia	Oscillospirales	Oscillospiraceae	Dysosmobacter	Dysosmobacter sp017446225
RGVC76	RGIG7716	Illumina Sequencing	tRNA	Bacteria	Bacteroidota	Bacteroidia	Bacteroidales	Rikenellaceae	Alistipes	Alistipes sp017555975
RGVC76	RGIG9040	Illumina Sequencing	tRNA	Bacteria	Bacteroidota	Bacteroidia	Bacteroidales	Rikenellaceae	Alistipes	Alistipes sp017937125
RGVC79	RUG14036	Rumen Superset	tRNA	Bacteria	Firmicutes_A	Clostridia	Oscillospirales	Oscillospiraceae	Limivicinus	Limivicinus sp902795045
RGVC82	RGIG1790	Illumina Sequencing	tRNA	Bacteria	Firmicutes_A	Clostridia	Christensenellales	Borkfalkiaceae	UBA1259
RGVC82	RGIG5415	Illumina Sequencing	tRNA	Bacteria	Firmicutes_A	Clostridia	Christensenellales	Borkfalkiaceae	UBA1259	UBA1259 sp017502525
RGVC82	RGIG5504	Illumina Sequencing	tRNA	Bacteria	Firmicutes_A	Clostridia	Christensenellales	Borkfalkiaceae	SIG402
RGVC82	RGIG6306	Illumina Sequencing	tRNA	Bacteria	Firmicutes_A	Clostridia	Christensenellales	QALW01	UMGS1338	UMGS1338 sp017516345
RGVC82	RGIG6430	Illumina Sequencing	tRNA	Bacteria	Firmicutes_A	Clostridia	Christensenellales	Borkfalkiaceae	HGM11412	HGM11412 sp017536205
RGVC82	RGIG8722	Illumina Sequencing	tRNA	Bacteria	Firmicutes_A	Clostridia	Christensenellales	Borkfalkiaceae	UBA1259	UBA1259 sp017621955
RGVC83	RGIG7329	Illumina Sequencing	tRNA	Bacteria	Firmicutes_A	Clostridia	Oscillospirales	Oscillospiraceae	Dysosmobacter	Dysosmobacter sp017547085
RGVC83	RUG13434	Rumen Superset	tRNA	Bacteria	Firmicutes_A	Clostridia	Oscillospirales	Oscillospiraceae	Limivicinus	Limivicinus sp900319275
RGVC83	RUG13964	Rumen Superset	tRNA	Bacteria	Firmicutes_A	Clostridia	Oscillospirales	Oscillospiraceae	Limivicinus	Limivicinus sp900320595
RGVC83	RUG14754	Rumen Superset	tRNA	Bacteria	Firmicutes_A	Clostridia	Oscillospirales	Oscillospiraceae	Limivicinus	Limivicinus sp902802215
RGVC83	RUG14782	Rumen Superset	tRNA	Bacteria	Firmicutes_A	Clostridia	Oscillospirales	Acutalibacteraceae	Ruminococcus_E	Ruminococcus_E sp900317315
RGVC84	RGIG585	Illumina Sequencing	tRNA	Bacteria	Firmicutes	Bacilli	Erysipelotrichales	Erysipelotrichaceae	Bulleidia	Bulleidia sp017512555
RGVC84	RGIG5901	Illumina Sequencing	tRNA	Bacteria	Firmicutes	Bacilli	Erysipelotrichales	Erysipelotrichaceae	Bulleidia	Bulleidia sp902793635
RGVC84	RUG11183	Rumen Superset	tRNA	Bacteria	Firmicutes	Bacilli	Erysipelotrichales	Erysipelotrichaceae	Bulleidia	Bulleidia sp902766675
RGVC84	RUG12097	Rumen Superset	tRNA	Bacteria	Firmicutes	Bacilli	Erysipelotrichales	Erysipelotrichaceae	Bulleidia	Bulleidia sp902775735
RGVC84	RUG12265	Rumen Superset	tRNA	Bacteria	Firmicutes	Bacilli	Erysipelotrichales	Erysipelotrichaceae	Bulleidia	Bulleidia sp000701725
RGVC84	RUG13473	Rumen Superset	tRNA	Bacteria	Firmicutes	Bacilli	Erysipelotrichales	Erysipelotrichaceae	Bulleidia	Bulleidia sp900319505
RGVC84	goat-flye.concoct.004_sub.contigs	HiFi Sequencing	CRISPR	Bacteria	Firmicutes_A	Clostridia	Oscillospirales	Oscillospiraceae	Dysosmobacter	Dysosmobacter sp017446225
RGVC85	RGIG8958	Illumina Sequencing	tRNA	Bacteria	Firmicutes_A	Clostridia	Oscillospirales	Oscillospiraceae	Avoscillospira	Avoscillospira sp017938625
RGVC85	RGIG9086	Illumina Sequencing	tRNA	Bacteria	Firmicutes_A	Clostridia	Oscillospirales	Oscillospiraceae	Faecousia	Faecousia sp017936205
RGVC85	RGIG9881	Illumina Sequencing	tRNA	Bacteria	Firmicutes_A	Clostridia	Oscillospirales	Oscillospiraceae	Faecousia
RGVC87	RUG11688	Rumen Superset	tRNA	Bacteria	Firmicutes_A	Clostridia	Oscillospirales	Oscillospiraceae	RUG626	RUG626 sp900317385
RGVC89	RUG10929	Rumen Superset	tRNA	Bacteria	Firmicutes	Bacilli	RF39	UBA660	CAG-1000	CAG-1000 sp902764145
RGVC90	RGIG8051	Illumina Sequencing	tRNA	Bacteria	Firmicutes_A	Clostridia	TANB77	CAG-508	CAG-452
RGVC90	RGIG9236	Illumina Sequencing	tRNA	Bacteria	Firmicutes_A	Clostridia	TANB77	CAG-508	CAG-269
RGVC92	RGIG6234	Illumina Sequencing	tRNA	Bacteria	Firmicutes_A	Clostridia	Oscillospirales	Acutalibacteraceae	DTU089	DTU089 sp017521425
RGVC92	RUG14696	Rumen Superset	tRNA	Bacteria	Firmicutes_A	Clostridia	Oscillospirales	Acutalibacteraceae	Ruminococcus_E	Ruminococcus_E sp900319615
RGVC92	RUG14847	Rumen Superset	tRNA	Bacteria	Firmicutes_A	Clostridia	Oscillospirales	Acutalibacteraceae	CAG-177	CAG-177 sp902796295
RGVC96	RGIG4135	Illumina Sequencing	tRNA	Bacteria	Firmicutes	Bacilli	RF39	UBA660	SIG200	SIG200 sp017441065
RGVC96	RGIG4184	Illumina Sequencing	tRNA	Bacteria	Firmicutes	Bacilli	RF39	UBA660	RGIG9169
RGVC97	HUN_Ruminococcus_sp_NK3A76	Rumen Superset	tRNA	Bacteria	Firmicutes_A	Clostridia	Oscillospirales	Ruminococcaceae	Ruminococcus_D	Ruminococcus_D sp000686125
RGVC97	RGIG2204	Illumina Sequencing	tRNA	Bacteria	Firmicutes_A	Clostridia	Oscillospirales	Acutalibacteraceae	UBA1417	UBA1417 sp017407665
RGVC97	RGIG469	Illumina Sequencing	tRNA	Bacteria	Firmicutes_A	Clostridia	Oscillospirales	Butyricicoccaceae	RGIG1902	RGIG1902 sp017421885
RGVC97	RGIG8048	Illumina Sequencing	tRNA	Bacteria	Firmicutes_A	Clostridia	Oscillospirales	Oscillospiraceae	RGIG8048	RGIG8048 sp017619535
RGVC97	RGIG9120	Illumina Sequencing	tRNA	Bacteria	Firmicutes_A	Clostridia	HGM11327	HGM11327	SIG351	SIG351 sp017935525
RGVC97	goat-flye.concoct.004_sub.contigs	HiFi Sequencing	tRNA	Bacteria	Firmicutes_A	Clostridia	Oscillospirales	Oscillospiraceae	Dysosmobacter	Dysosmobacter sp017446225
RGVC97	RUG13610	Rumen Superset	tRNA	Bacteria	Firmicutes_A	Clostridia	Christensenellales	CAG-74	UBA2862	UBA2862 sp902799465
RGVC97	RUG13887	Rumen Superset	tRNA	Bacteria	Firmicutes_A	Clostridia	Oscillospirales	Acutalibacteraceae	Fimenecus	Fimenecus sp900315985
RGVC98	RGIG7447	Illumina Sequencing	tRNA	Bacteria	Firmicutes_A	Clostridia	Oscillospirales	Oscillospiraceae	CAG-83	CAG-83 sp017549325
RGVC98	RGIG9135	Illumina Sequencing	tRNA	Bacteria	Firmicutes_A	Clostridia	Oscillospirales	Oscillospiraceae	Evtepia
RGVC98	RGIG9400	Illumina Sequencing	tRNA	Bacteria	Firmicutes_A	Clostridia	Oscillospirales	Oscillospiraceae	Faecousia	Faecousia sp017632035
RGVC98	RUG13187	Rumen Superset	tRNA	Bacteria	Firmicutes_A	Clostridia	Oscillospirales	Oscillospiraceae	CAG-83	CAG-83 sp902765025
RGVC98	RUG14754	Rumen Superset	tRNA	Bacteria	Firmicutes_A	Clostridia	Oscillospirales	Oscillospiraceae	Limivicinus	Limivicinus sp902802215
RGVC100	RGIG4011	Illumina Sequencing	tRNA	Bacteria	Firmicutes_A	Clostridia	Lachnospirales	Lachnospiraceae	Acetatifactor
RGVC100	RGIG4014	Illumina Sequencing	tRNA	Bacteria	Firmicutes_A	Clostridia	Lachnospirales	Lachnospiraceae	CAG-510
RGVC100	RGIG9364	Illumina Sequencing	tRNA	Bacteria	Firmicutes_A	Clostridia	Lachnospirales	Lachnospiraceae	AC2028	AC2028 sp017964745
RGVC100	RUG13378	Rumen Superset	tRNA	Bacteria	Firmicutes_A	Clostridia	Lachnospirales	Lachnospiraceae	Acetatifactor	Acetatifactor sp900320485
RGVC100	RUG13616	Rumen Superset	tRNA	Bacteria	Firmicutes_A	Clostridia	Lachnospirales	Lachnospiraceae	Clostridium_R	Clostridium_R sp003445895
RGVC105	RUG10997	Rumen Superset	tRNA	Bacteria	Verrucomicrobiota	Kiritimatiellae	RFP12	UBA1067	UBA1067	UBA1067 sp017463935
RGVC107	RGIG3038	Illumina Sequencing	tRNA	Bacteria	Firmicutes	Bacilli	RF39	UBA660	RUG11788	RUG11788 sp017436345
RGVC107	RGIG3081	Illumina Sequencing	tRNA	Bacteria	Firmicutes	Bacilli	RF39	UBA660	RGIG1752	RGIG1752 sp017435485
RGVC107	RGIG8845	Illumina Sequencing	tRNA	Bacteria	Firmicutes	Bacilli	RF39	UBA660	CAG-417	CAG-417 sp017941235
RGVC107	RUG13868	Rumen Superset	tRNA	Bacteria	Firmicutes	Bacilli	RF39	UBA660	RUG13868	RUG13868 sp902793375
RGVC107	RUG14409	Rumen Superset	tRNA	Bacteria	Firmicutes	Bacilli	RF39	UBA660	UBA3789	UBA3789 sp902793315
RGVC112	RGIG7763	Illumina Sequencing	tRNA	Bacteria	Firmicutes_A	Clostridia	Oscillospirales	Butyricicoccaceae	RGIG3513	RGIG3513 sp017556565
RGVC112	RGIG998	Illumina Sequencing	tRNA	Bacteria	Proteobacteria	Gammaproteobacteria	Enterobacterales	Succinivibrionaceae	Succinivibrio	Succinivibrio sp003456415
RGVC112	RUG13887	Rumen Superset	tRNA	Bacteria	Firmicutes_A	Clostridia	Oscillospirales	Acutalibacteraceae	Fimenecus	Fimenecus sp900315985
RGVC112	RUG14696	Rumen Superset	tRNA	Bacteria	Firmicutes_A	Clostridia	Oscillospirales	Acutalibacteraceae	Ruminococcus_E	Ruminococcus_E sp900319615
RGVC113	RGIG8682	Illumina Sequencing	tRNA	Bacteria	Firmicutes_B	Peptococcia	Peptococcales	Peptococcaceae	UBA7185	UBA7185 sp017622155
RGVC113	RGIG8964	Illumina Sequencing	tRNA	Bacteria	Firmicutes_B	Peptococcia	Peptococcales	Peptococcaceae	UBA7185	UBA7185 sp017622155
RGVC113	RGIG897	Illumina Sequencing	tRNA	Bacteria	Firmicutes_B	Peptococcia	Peptococcales	Peptococcaceae	UBA7185	UBA7185 sp017383785
RGVC113	RGIG8988	Illumina Sequencing	tRNA	Bacteria	Firmicutes_B	Peptococcia	Peptococcales	Peptococcaceae	UBA7185	UBA7185 sp017622155
RGVC113	RGIG9127	Illumina Sequencing	tRNA	Bacteria	Firmicutes_B	Peptococcia	Peptococcales	Peptococcaceae	UBA7185	UBA7185 sp017622155
RGVC113	RUG13608	Rumen Superset	tRNA	Bacteria	Firmicutes_A	Clostridia	Saccharofermentanales	Saccharofermentanaceae	Saccharofermentans	Saccharofermentans sp900314745
RGVC115	HUN_Butyrivibrio_sp_AE3003	Rumen Superset	tRNA	Bacteria	Firmicutes_A	Clostridia	Lachnospirales	Lachnospiraceae	Butyrivibrio	Butyrivibrio hungatei_A
RGVC115	RGIG6397	Illumina Sequencing	tRNA	Bacteria	Firmicutes_A	Clostridia	Lachnospirales	Lachnospiraceae	SFDP01	SFDP01 sp017521195
RGVC115	RGIG7478	Illumina Sequencing	tRNA	Bacteria	Firmicutes_A	Clostridia	Lachnospirales	Lachnospiraceae	SFDP01	SFDP01 sp017558145
RGVC115	RUG11237	Rumen Superset	tRNA	Bacteria	Firmicutes_A	Clostridia	Lachnospirales	Lachnospiraceae	RUG11237	RUG11237 sp902767135
RGVC116	RGIG4555	Illumina Sequencing	tRNA	Bacteria	Bacteroidota	Bacteroidia	Bacteroidales	UBA932	Cryptobacteroides	Cryptobacteroides sp017473705
RGVC116	RGIG7423	Illumina Sequencing	tRNA	Bacteria	Bacteroidota	Bacteroidia	Bacteroidales	UBA932	Cryptobacteroides
RGVC116	RGIG7475	Illumina Sequencing	tRNA	Bacteria	Bacteroidota	Bacteroidia	Bacteroidales	UBA932	Cryptobacteroides	Cryptobacteroides sp017546585
RGVC116	RGIG8683	Illumina Sequencing	tRNA	Bacteria	Bacteroidota	Bacteroidia	Bacteroidales	UBA932	Cryptobacteroides	Cryptobacteroides sp017465225
RGVC116	RGIG9460	Illumina Sequencing	tRNA	Bacteria	Bacteroidota	Bacteroidia	Bacteroidales	Paludibacteraceae	RGIG9379	RGIG9379 sp017632345
RGVC116	RGIG9478	Illumina Sequencing	tRNA	Bacteria	Bacteroidota	Bacteroidia	Bacteroidales	Rikenellaceae	Alistipes	Alistipes sp017630455
RGVC116	RGIG9566	Illumina Sequencing	tRNA	Bacteria	Bacteroidota	Bacteroidia	Bacteroidales	UBA932	Cryptobacteroides	Cryptobacteroides sp017560825
RGVC116	RGIG9856	Illumina Sequencing	tRNA	Bacteria	Bacteroidota	Bacteroidia	Bacteroidales	UBA932	Coprenecus	Coprenecus sp900769885
RGVC116	RUG14413	Rumen Superset	tRNA	Bacteria	Bacteroidota	Bacteroidia	Bacteroidales	UBA932	Cryptobacteroides	Cryptobacteroides sp900316675
RGVC116	RUG14817	Rumen Superset	tRNA	Bacteria	Firmicutes_C	Negativicutes	Acidaminococcales	Acidaminococcaceae	Succiniclasticum	Succiniclasticum sp900315925
RGVC119	RUG14016	Rumen Superset	tRNA	Bacteria	Bacteroidota	Bacteroidia	Bacteroidales	Bacteroidaceae	Prevotella	Prevotella sp900316265
RGVC119	RUG14533	Rumen Superset	tRNA	Bacteria	Bacteroidota	Bacteroidia	Bacteroidales	UBA3663	UBA3663	UBA3663 sp900319235
RGVC119	RUG14743	Rumen Superset	tRNA	Bacteria	Bacteroidota	Bacteroidia	Bacteroidales	Bacteroidaceae	Prevotella	Prevotella sp902771785
RGVC119	RUG14761	Rumen Superset	tRNA	Bacteria	Bacteroidota	Bacteroidia	Bacteroidales	Bacteroidaceae	Prevotella	Prevotella sp900320255
RGVC119	RUG14797	Rumen Superset	tRNA	Bacteria	Bacteroidota	Bacteroidia	Bacteroidales	Bacteroidaceae	Prevotella	Prevotella sp900314995
RGVC119	SOL_PREV32	Rumen Superset	tRNA	Bacteria	Bacteroidota	Bacteroidia	Bacteroidales	Bacteroidaceae	Prevotella
RGVC119	SVA_102_bin76	Rumen Superset	tRNA	Bacteria	Bacteroidota	Bacteroidia	Bacteroidales	Bacteroidaceae	Prevotella
RGVC119	SVA_105_bin38	Rumen Superset	tRNA	Bacteria	Bacteroidota	Bacteroidia	Bacteroidales	Bacteroidaceae	Prevotella
RGVC119	SVA_105_bin67	Rumen Superset	tRNA	Bacteria	Bacteroidota	Bacteroidia	Bacteroidales	Bacteroidaceae	Prevotella
RGVC119	SVA_105_bin7	Rumen Superset	tRNA	Bacteria	Bacteroidota	Bacteroidia	Bacteroidales	Bacteroidaceae	UBA3839
RGVC119	SVA_106_bin57	Rumen Superset	tRNA	Bacteria	Bacteroidota	Bacteroidia	Bacteroidales	Bacteroidaceae	Prevotella
RGVC124	RUG13887	Rumen Superset	tRNA	Bacteria	Firmicutes_A	Clostridia	Oscillospirales	Acutalibacteraceae	Fimenecus	Fimenecus sp900315985
RGVC125	RGIG3990	Illumina Sequencing	tRNA	Bacteria	Firmicutes_A	Clostridia	Oscillospirales	Ruminococcaceae	JAAZZIT01	JAAZZIT01 sp017451665
RGVC125	RGIG4256	Illumina Sequencing	tRNA	Bacteria	Firmicutes_A	Clostridia	Christensenellales	UBA1242	Caccovivens	Caccovivens sp017464845
RGVC125	RGIG6870	Illumina Sequencing	tRNA	Bacteria	Firmicutes_A	Clostridia	Christensenellales	Christensenellaceae	QANA01	QANA01 sp017439085
RGVC127	goat-flye.concoct.004_sub.contigs	HiFi Sequencing	tRNA	Bacteria	Firmicutes_A	Clostridia	Oscillospirales	Oscillospiraceae	Dysosmobacter	Dysosmobacter sp017446225
RGVC128	RGIG4599	Illumina Sequencing	tRNA	Bacteria	Firmicutes_A	Clostridia	Oscillospirales	Oscillospiraceae	Faecousia	Faecousia sp017473455
RGVC128	RUG10131	Rumen Superset	tRNA	Bacteria	Firmicutes_A	Clostridia	Oscillospirales	Oscillospiraceae	Limivicinus	Limivicinus sp900319835
RGVC128	RUG10618	Rumen Superset	tRNA	Bacteria	Firmicutes_A	Clostridia	Oscillospirales	Oscillospiraceae	Limivicinus	Limivicinus sp900321275
RGVC128	RUG13034	Rumen Superset	tRNA	Bacteria	Firmicutes_A	Clostridia	Oscillospirales	Oscillospiraceae	Limivicinus	Limivicinus sp902785115
RGVC128	RUG13047	Rumen Superset	tRNA	Bacteria	Firmicutes_A	Clostridia	Oscillospirales	Oscillospiraceae	Limivicinus	Limivicinus sp900319695
RGVC128	RUG13887	Rumen Superset	tRNA	Bacteria	Firmicutes_A	Clostridia	Oscillospirales	Acutalibacteraceae	Fimenecus	Fimenecus sp900315985
RGVC128	RUG14543	Rumen Superset	tRNA	Bacteria	Firmicutes_A	Clostridia	Oscillospirales	Oscillospiraceae	Limivicinus	Limivicinus sp900319635
RGVC128	RUG14654	Rumen Superset	tRNA	Bacteria	Firmicutes_A	Clostridia	Oscillospirales	Oscillospiraceae	Limivicinus	Limivicinus sp902801295
RGVC128	RUG14738	Rumen Superset	tRNA	Bacteria	Firmicutes_A	Clostridia	Oscillospirales	Oscillospiraceae	Limivicinus	Limivicinus sp900320595
RGVC128	RUG14822	Rumen Superset	tRNA	Bacteria	Firmicutes_A	Clostridia	Oscillospirales	Acutalibacteraceae	UBA1213	UBA1213 sp902802985
RGVC130	RGIG7498	Illumina Sequencing	tRNA	Bacteria	Firmicutes_A	Clostridia	Oscillospirales	Oscillospiraceae	Faecousia
RGVC130	RGIG8706	Illumina Sequencing	tRNA	Archaea	Halobacteriota	Methanomicrobia	Methanomicrobiales	Methanocorpusculaceae	Methanocorpusculum	Methanocorpusculum sp017622255
RGVC132	RGIG2985	Illumina Sequencing	tRNA	Bacteria	Firmicutes_A	Clostridia	Oscillospirales	Butyricicoccaceae	SIG471	SIG471 sp017441945
RGVC133	RGIG1694	Illumina Sequencing	tRNA	Bacteria	Firmicutes_A	Clostridia	Lachnospirales	Lachnospiraceae	RUG11237	RUG11237 sp017399445
RGVC133	RGIG4249	Illumina Sequencing	tRNA	Bacteria	Firmicutes_A	Clostridia	Oscillospirales	Oscillospiraceae	Faecousia	Faecousia sp017461445
RGVC133	RGIG7498	Illumina Sequencing	tRNA	Bacteria	Firmicutes_A	Clostridia	Oscillospirales	Oscillospiraceae	Faecousia
RGVC133	RGIG8578	Illumina Sequencing	tRNA	Bacteria	Firmicutes_A	Clostridia	Oscillospirales	Oscillospiraceae	Faecousia	Faecousia sp017624715
RGVC133	RGIG8691	Illumina Sequencing	tRNA	Bacteria	Firmicutes_A	Clostridia	Oscillospirales	Oscillospiraceae	Faecousia
RGVC133	RGIG8937	Illumina Sequencing	tRNA	Bacteria	Firmicutes_A	Clostridia	Oscillospirales	Oscillospiraceae	Faecousia	Faecousia sp017939025
RGVC133	RGIG9045	Illumina Sequencing	tRNA	Bacteria	Firmicutes_A	Clostridia	Oscillospirales	Oscillospiraceae	Faecousia	Faecousia sp017936985
RGVC133	RGIG9400	Illumina Sequencing	tRNA	Bacteria	Firmicutes_A	Clostridia	Oscillospirales	Oscillospiraceae	Faecousia	Faecousia sp017632035
RGVC133	RGIG9475	Illumina Sequencing	tRNA	Bacteria	Firmicutes_A	Clostridia	Oscillospirales	Oscillospiraceae	Faecousia	Faecousia sp017630495
RGVC133	RGIG9881	Illumina Sequencing	tRNA	Bacteria	Firmicutes_A	Clostridia	Oscillospirales	Oscillospiraceae	Faecousia
RGVC133	RUG14158	Rumen Superset	tRNA	Bacteria	Firmicutes_A	Clostridia	Oscillospirales	Oscillospiraceae	CAG-170	CAG-170 sp902796245
RGVC134	RGIG8739	Illumina Sequencing	tRNA	Bacteria	Firmicutes_A	Clostridia	Oscillospirales	CAG-272	CAG-272	CAG-272 sp017621655
RGVC135	RGIG1964	Illumina Sequencing	tRNA	Bacteria	Firmicutes_A	Clostridia	Oscillospirales	CAG-272	SIG701
RGVC135	RGIG9152	Illumina Sequencing	tRNA	Bacteria	Firmicutes_A	Clostridia	Oscillospirales	CAG-272	UMGS1696	UMGS1696 sp015065295
RGVC135	RGIG955	Illumina Sequencing	tRNA	Bacteria	Firmicutes_A	Clostridia	Oscillospirales	CAG-272	SIG710
RGVC135	RGIG9597	Illumina Sequencing	tRNA	Bacteria	Firmicutes_A	Clostridia	Oscillospirales	CAG-272	RGIG3925	RGIG3925 sp017628075
RGVC135	RGIG9912	Illumina Sequencing	tRNA	Bacteria	Firmicutes_A	Clostridia	Oscillospirales	CAG-272	UBA1740	UBA1740 sp017646745
RGVC135	RUG13077	Rumen Superset	tRNA	Bacteria	Firmicutes_A	Clostridia	Oscillospirales	CAG-272	RUG13077	RUG13077 sp902785485
RGVC136	RGIG1694	Illumina Sequencing	tRNA	Bacteria	Firmicutes_A	Clostridia	Lachnospirales	Lachnospiraceae	RUG11237	RUG11237 sp017399445
RGVC136	RGIG7100	Illumina Sequencing	tRNA	Bacteria	Firmicutes_A	Clostridia	Christensenellales	CAG-74	Firm-10	Firm-10 sp017620115
RGVC136	RUG14340	Rumen Superset	tRNA	Bacteria	Firmicutes_A	Clostridia	Christensenellales	CAG-74	UBA2862	UBA2862 sp902798105
RGVC140	RUG13503	Rumen Superset	tRNA	Bacteria	Firmicutes_A	Clostridia	Christensenellales	CAG-74	UBA4246	UBA4246 sp902789795
RGVC148	RUG13848	Rumen Superset	tRNA	Bacteria	Firmicutes_A	Clostridia	Oscillospirales	Acutalibacteraceae	CAG-964	CAG-964 sp900316615
RGVC148	RUG14662	Rumen Superset	tRNA	Bacteria	Firmicutes_A	Clostridia	Oscillospirales	Acutalibacteraceae	RUG592	RUG592 sp902801245
RGVC152	RGIG6427	Illumina Sequencing	tRNA	Bacteria	Firmicutes_A	Clostridia	Oscillospirales	CAG-272	UBA1740	UBA1740 sp017533565
RGVC152	RGIG8508	Illumina Sequencing	tRNA	Bacteria	Firmicutes_A	Clostridia	Oscillospirales	CAG-272	RGIG2000	RGIG2000 sp017625915
RGVC152	RGIG8539	Illumina Sequencing	tRNA	Bacteria	Firmicutes_A	Clostridia	Oscillospirales	CAG-272	RGIG2000	RGIG2000 sp017625935
RGVC152	RGIG8715	Illumina Sequencing	tRNA	Bacteria	Firmicutes_A	Clostridia	Oscillospirales	CAG-272	RGIG8715	RGIG8715 sp017622085
RGVC152	RGIG9037	Illumina Sequencing	tRNA	Bacteria	Firmicutes_A	Clostridia	Oscillospirales	CAG-272	RGIG2000	RGIG2000 sp017937135
RGVC152	RGIG9432	Illumina Sequencing	tRNA	Bacteria	Firmicutes_A	Clostridia	Oscillospirales	CAG-272	UBA1740	UBA1740 sp017631325
RGVC152	RGIG955	Illumina Sequencing	tRNA	Bacteria	Firmicutes_A	Clostridia	Oscillospirales	CAG-272	SIG710
RGVC155	RGIG2122	Illumina Sequencing	tRNA	Bacteria	Firmicutes_A	Clostridia	Oscillospirales	Acutalibacteraceae	CAG-177	CAG-177 sp017409265
RGVC155	RGIG5147	Illumina Sequencing	tRNA	Bacteria	Firmicutes_A	Clostridia	Lachnospirales	Lachnospiraceae	Blautia_A	Blautia_A sp017475035
RGVC155	RGIG6397	Illumina Sequencing	tRNA	Bacteria	Firmicutes_A	Clostridia	Lachnospirales	Lachnospiraceae	SFDP01	SFDP01 sp017521195
RGVC155	RGIG8251	Illumina Sequencing	tRNA	Bacteria	Firmicutes_A	Clostridia	Lachnospirales	Lachnospiraceae	UBA1201	UBA1201 sp017615545
RGVC155	RUG11237	Rumen Superset	tRNA	Bacteria	Firmicutes_A	Clostridia	Lachnospirales	Lachnospiraceae	RUG11237	RUG11237 sp902767135
RGVC155	RUG12122	Rumen Superset	tRNA	Bacteria	Firmicutes_A	Clostridia	Lachnospirales	Lachnospiraceae	UBA2882	UBA2882 sp900317505
RGVC155	RUG13673	Rumen Superset	tRNA	Bacteria	Firmicutes_A	Clostridia	Lachnospirales	Lachnospiraceae	Bilifractor	Bilifractor sp900317175
RGVC155	RUG13871	Rumen Superset	tRNA	Bacteria	Firmicutes_A	Clostridia	Lachnospirales	Lachnospiraceae	Acetatifactor	Acetatifactor sp900320485
RGVC155	RUG14319	Rumen Superset	tRNA	Bacteria	Firmicutes_A	Clostridia	Lachnospirales	Lachnospiraceae	RUG14319	RUG14319 sp902797845
RGVC155	RUG14809	Rumen Superset	tRNA	Bacteria	Firmicutes_A	Clostridia	Oscillospirales	Oscillospiraceae	Limivicinus	Limivicinus sp900321275
RGVC155	RUG14938	Rumen Superset	tRNA	Bacteria	Firmicutes_A	Clostridia	Lachnospirales	Lachnospiraceae	RUG147	RUG147 sp900315495
RGVC155	SOL_FIRM17	Rumen Superset	tRNA	Bacteria	Firmicutes_A	Clostridia	Lachnospirales	Lachnospiraceae	CAG-303	CAG-303 sp905236025
RGVC157	RGIG1684	Illumina Sequencing	tRNA	Bacteria	Firmicutes_A	Clostridia	Christensenellales	CAG-74	SFTH01
RGVC157	RGIG1780	Illumina Sequencing	tRNA	Bacteria	Firmicutes_A	Clostridia	Christensenellales	CAG-138	UBA1685	UBA1685 sp017435905
RGVC157	RGIG3146	Illumina Sequencing	tRNA	Bacteria	Firmicutes_A	Clostridia	Christensenellales	CAG-74	Faecivicinus
RGVC157	RUG10288	Rumen Superset	tRNA	Bacteria	Firmicutes_A	Clostridia	Christensenellales	CAG-138	UBA3792	UBA3792 sp900318745
RGVC157	RUG11088	Rumen Superset	tRNA	Bacteria	Firmicutes_A	Clostridia	Christensenellales	CAG-74	UBA2862	UBA2862 sp002350605
RGVC157	RUG13857	Rumen Superset	tRNA	Bacteria	Firmicutes_A	Clostridia	Christensenellales	CAG-74	UBA2862	UBA2862 sp900315585
RGVC157	RUG13861	Rumen Superset	tRNA	Bacteria	Firmicutes_A	Clostridia	Christensenellales	CAG-74	UBA2862	UBA2862 sp902793325
RGVC157	RUG14473	Rumen Superset	tRNA	Bacteria	Firmicutes_A	Clostridia	Christensenellales	CAG-74	UBA2862	UBA2862 sp902799465
RGVC160	RUG13585	Rumen Superset	tRNA	Bacteria	Firmicutes_A	Clostridia	Oscillospirales	Oscillospiraceae	Faecousia	Faecousia sp900315595
RGVC160	RUG14158	Rumen Superset	tRNA	Bacteria	Firmicutes_A	Clostridia	Oscillospirales	Oscillospiraceae	CAG-170	CAG-170 sp902796245
RGVC160	RUG14543	Rumen Superset	tRNA	Bacteria	Firmicutes_A	Clostridia	Oscillospirales	Oscillospiraceae	Limivicinus	Limivicinus sp900319635
RGVC162	RGIG6289	Illumina Sequencing	tRNA	Bacteria	Firmicutes_A	Clostridia	Oscillospirales	Oscillospiraceae	Faecousia	Faecousia sp017521485
RGVC162	RGIG9400	Illumina Sequencing	tRNA	Bacteria	Firmicutes_A	Clostridia	Oscillospirales	Oscillospiraceae	Faecousia	Faecousia sp017632035
RGVC162	RUG13751	Rumen Superset	tRNA	Bacteria	Firmicutes_A	Clostridia	Oscillospirales	Oscillospiraceae	Faecousia	Faecousia sp900316335
RGVC164	RGIG4278	Illumina Sequencing	tRNA	Bacteria	Firmicutes_A	Clostridia	Oscillospirales	Oscillospiraceae	Faecousia
RGVC164	RGIG5428	Illumina Sequencing	tRNA	Bacteria	Firmicutes_A	Clostridia	Oscillospirales	Oscillospiraceae	Faecousia	Faecousia sp017502265
RGVC164	RGIG8578	Illumina Sequencing	tRNA	Bacteria	Firmicutes_A	Clostridia	Oscillospirales	Oscillospiraceae	Faecousia	Faecousia sp017624715
RGVC165	RGIG1694	Illumina Sequencing	tRNA	Bacteria	Firmicutes_A	Clostridia	Lachnospirales	Lachnospiraceae	RUG11237	RUG11237 sp017399445
RGVC165	RGIG6256	Illumina Sequencing	tRNA	Bacteria	Firmicutes_A	Clostridia	Christensenellales	CAG-74	Limiplasma	Limiplasma sp017516765
RGVC165	RGIG6323	Illumina Sequencing	tRNA	Bacteria	Firmicutes_A	Clostridia	Christensenellales	CAG-74	Limiplasma
RGVC165	RGIG8959	Illumina Sequencing	tRNA	Bacteria	Firmicutes_A	Clostridia	Christensenellales	CAG-74	Limiplasma	Limiplasma sp017938645
RGVC165	RUG10690	Rumen Superset	tRNA	Bacteria	Firmicutes_A	Clostridia	Christensenellales	CAG-74	RUG563	RUG563 sp902761755
RGVC165	RUG11181	Rumen Superset	tRNA	Bacteria	Firmicutes_A	Clostridia	Lachnospirales	Lachnospiraceae	Porcincola
RGVC169	RGIG4029	Illumina Sequencing	tRNA	Bacteria	Firmicutes_A	Clostridia	Christensenellales	Borkfalkiaceae	Scatosoma	Scatosoma sp017463325
RGVC169	RGIG8468	Illumina Sequencing	tRNA	Bacteria	Firmicutes_A	Clostridia	Oscillospirales	CAG-272	CAG-448	CAG-448 sp017626655
RGVC174	RGIG1767	Illumina Sequencing	tRNA	Bacteria	Firmicutes_A	Clostridia	Oscillospirales	Oscillospiraceae	Limivicinus	Limivicinus sp017398685
RGVC174	RUG10366	Rumen Superset	tRNA	Bacteria	Firmicutes_A	Clostridia	Oscillospirales	Oscillospiraceae	Limivicinus	Limivicinus sp900319935
RGVC174	RUG12832	Rumen Superset	tRNA	Bacteria	Firmicutes_A	Clostridia	Oscillospirales	Oscillospiraceae	ER4	ER4 sp902783035
RGVC174	RUG13959	Rumen Superset	tRNA	Bacteria	Firmicutes_A	Clostridia	Oscillospirales	Oscillospiraceae	Limivicinus	Limivicinus sp902793285
RGVC175	RGIG6182	Illumina Sequencing	tRNA	Bacteria	Desulfobacterota_I	Desulfovibrionia	Desulfovibrionales	Desulfovibrionaceae	Mailhella	Mailhella sp017522745
RGVC178	RGIG1712	Illumina Sequencing	tRNA	Bacteria	Firmicutes_A	Clostridia	Lachnospirales	Lachnospiraceae	Faecalimonas	Faecalimonas sp017416155
RGVC178	RGIG2122	Illumina Sequencing	tRNA	Bacteria	Firmicutes_A	Clostridia	Oscillospirales	Acutalibacteraceae	CAG-177	CAG-177 sp017409265
RGVC178	RGIG4687	Illumina Sequencing	tRNA	Bacteria	Firmicutes_A	Clostridia	Lachnospirales	Lachnospiraceae	Faecalimonas	Faecalimonas sp017472665
RGVC178	RGIG6149	Illumina Sequencing	tRNA	Bacteria	Firmicutes_A	Clostridia	Lachnospirales	Lachnospiraceae	Agathobacter	Agathobacter sp017523185
RGVC178	RGIG6892	Illumina Sequencing	tRNA	Bacteria	Firmicutes_A	Clostridia	Lachnospirales	Lachnospiraceae	UBA1712	UBA1712 sp902789785
RGVC178	RUG10801	Rumen Superset	tRNA	Bacteria	Firmicutes_A	Clostridia	Lachnospirales	Lachnospiraceae	Agathobacter	Agathobacter faecis
RGVC178	RUG11237	Rumen Superset	tRNA	Bacteria	Firmicutes_A	Clostridia	Lachnospirales	Lachnospiraceae	RUG11237	RUG11237 sp902767135
RGVC178	RUG13222	Rumen Superset	tRNA	Bacteria	Firmicutes_A	Clostridia	Peptostreptococcales	Anaerovoracaceae	RUG099	RUG099 sp902786855
RGVC178	RUG13871	Rumen Superset	tRNA	Bacteria	Firmicutes_A	Clostridia	Lachnospirales	Lachnospiraceae	Acetatifactor	Acetatifactor sp900320485
RGVC178	RUG14809	Rumen Superset	tRNA	Bacteria	Firmicutes_A	Clostridia	Oscillospirales	Oscillospiraceae	Limivicinus	Limivicinus sp900321275
RGVC178	RUG14938	Rumen Superset	tRNA	Bacteria	Firmicutes_A	Clostridia	Lachnospirales	Lachnospiraceae	RUG147	RUG147 sp900315495
RGVC182	RGIG1669	Illumina Sequencing	tRNA	Bacteria	Firmicutes_A	Clostridia	Oscillospirales	Oscillospiraceae	Lawsonibacter	Lawsonibacter sp017416685
RGVC183	RUG13058	Rumen Superset	tRNA	Bacteria	Firmicutes_A	Clostridia	Oscillospirales	Acutalibacteraceae	UBA1213	UBA1213 sp900317395
RGVC184	RGIG7498	Illumina Sequencing	tRNA	Bacteria	Firmicutes_A	Clostridia	Oscillospirales	Oscillospiraceae	Faecousia
RGVC184	RGIG8706	Illumina Sequencing	tRNA	Archaea	Halobacteriota	Methanomicrobia	Methanomicrobiales	Methanocorpusculaceae	Methanocorpusculum	Methanocorpusculum sp017622255
RGVC184	RGIG9045	Illumina Sequencing	tRNA	Bacteria	Firmicutes_A	Clostridia	Oscillospirales	Oscillospiraceae	Faecousia	Faecousia sp017936985
RGVC186	RGIG2191	Illumina Sequencing	tRNA	Bacteria	Firmicutes_B	Dehalobacteriia	UBA7702	UBA7702	UBA7702
RGVC188	RGIG6413	Illumina Sequencing	tRNA	Bacteria	Firmicutes	Bacilli	RF39	UBA660	UMGS1613	UMGS1613 sp017536505
RGVC188	RGIG6635	Illumina Sequencing	tRNA	Bacteria	Firmicutes	Bacilli	RF39	UBA660	RGIG6635	RGIG6635 sp017527675
RGVC188	RUG13452	Rumen Superset	tRNA	Bacteria	Firmicutes	Bacilli	RF39	UBA660	UBA3789	UBA3789 sp900314225
RGVC188	SVA_102_bin56	Rumen Superset	tRNA	Bacteria	Firmicutes	Bacilli	RF39	UBA660	Coprovivens
RGVC189	RGIG8799	Illumina Sequencing	tRNA	Bacteria	Firmicutes_A	Clostridia	Oscillospirales	Butyricicoccaceae	UBA4644	UBA4644 sp017620505
RGVC189	RUG11372	Rumen Superset	tRNA	Bacteria	Firmicutes_A	Clostridia	Oscillospirales	Acutalibacteraceae	Ruminococcus_E	Ruminococcus_E sp900317595
RGVC189	RUG11663	Rumen Superset	tRNA	Bacteria	Firmicutes_A	Clostridia	Oscillospirales	Oscillospiraceae	RUG626	RUG626 sp900317385
RGVC189	RUG14754	Rumen Superset	tRNA	Bacteria	Firmicutes_A	Clostridia	Oscillospirales	Oscillospiraceae	Limivicinus	Limivicinus sp902802215
RGVC191	RGIG4780	Illumina Sequencing	tRNA	Bacteria	Proteobacteria	Alphaproteobacteria	RF32	CAG-239	RUG410	RUG410 sp017471705
RGVC191	RGIG5714	Illumina Sequencing	tRNA	Bacteria	Proteobacteria	Alphaproteobacteria	Rhizobiales	Hyphomicrobiaceae	Hyphomicrobium	Hyphomicrobium sp017512425
RGVC191	RGIG9125	Illumina Sequencing	tRNA	Bacteria	Proteobacteria	Alphaproteobacteria	RF32	CAG-239	MGBC133411	MGBC133411 sp017935485
RGVC191	RUG10672	Rumen Superset	tRNA	Bacteria	Proteobacteria	Alphaproteobacteria	RF32	CAG-239	CAZU01	CAZU01 sp902761535
RGVC191	RUG10873	Rumen Superset	tRNA	Bacteria	Proteobacteria	Alphaproteobacteria	RF32	CAG-239	CAZU01	CAZU01 sp902763535
RGVC191	RUG12293	Rumen Superset	tRNA	Bacteria	Proteobacteria	Alphaproteobacteria	RF32	CAG-239	RUG410	RUG410 sp902788365
RGVC193	RGIG5295	Illumina Sequencing	tRNA	Bacteria	Firmicutes_A	Clostridia	Oscillospirales	Oscillospiraceae	Faecousia
RGVC197	RGIG5260	Illumina Sequencing	tRNA	Bacteria	Firmicutes_A	Clostridia	Christensenellales	Borkfalkiaceae	UBA1259	UBA1259 sp017505625
RGVC197	RGIG5378	Illumina Sequencing	tRNA	Bacteria	Firmicutes_A	Clostridia	Christensenellales	Borkfalkiaceae	UBA1259	UBA1259 sp017503265
RGVC197	RGIG6306	Illumina Sequencing	tRNA	Bacteria	Firmicutes_A	Clostridia	Christensenellales	QALW01	UMGS1338	UMGS1338 sp017516345
RGVC197	RGIG7786	Illumina Sequencing	tRNA	Bacteria	Firmicutes_A	Clostridia	Christensenellales	Borkfalkiaceae	UBA1259	UBA1259 sp017554545
RGVC197	RGIG8722	Illumina Sequencing	tRNA	Bacteria	Firmicutes_A	Clostridia	Christensenellales	Borkfalkiaceae	UBA1259	UBA1259 sp017621955
RGVC197	RUG11138	Rumen Superset	tRNA	Bacteria	Firmicutes_A	Clostridia	Christensenellales	Borkfalkiaceae	UBA4636	UBA4636 sp900770945
RGVC202	RGIG1994	Illumina Sequencing	tRNA	Bacteria	Firmicutes_A	Clostridia	Monoglobales	Monoglobaceae	UMGS1326
RGVC203	RGIG5283	Illumina Sequencing	tRNA	Bacteria	Bacteroidota	Bacteroidia	Bacteroidales	Bacteroidaceae	HGM04593	HGM04593 sp017503645
RGVC205	RUG13860	Rumen Superset	tRNA	Bacteria	Firmicutes_A	Clostridia	Christensenellales	CAG-74	RUG563	RUG563 sp902793245
RGVC205	RUG14340	Rumen Superset	tRNA	Bacteria	Firmicutes_A	Clostridia	Christensenellales	CAG-74	UBA2862	UBA2862 sp902798105
RGVC205	RUG14601	Rumen Superset	tRNA	Bacteria	Firmicutes_A	Clostridia	Christensenellales	CAG-74	UBA2862	UBA2862 sp902800625
RGVC207	RGIG1866	Illumina Sequencing	tRNA	Bacteria	Bacteroidota	Bacteroidia	Bacteroidales	Bacteroidaceae	HGM04593	HGM04593 sp015060835
RGVC209	RGIG2129	Illumina Sequencing	tRNA	Bacteria	Firmicutes_A	Clostridia	Oscillospirales	Oscillospiraceae	Faecousia	Faecousia sp017409205
RGVC209	RGIG8705	Illumina Sequencing	tRNA	Bacteria	Firmicutes_A	Clostridia	Oscillospirales	Oscillospiraceae	Faecousia	Faecousia sp017622295
RGVC209	RGIG9441	Illumina Sequencing	tRNA	Bacteria	Firmicutes_A	Clostridia	Oscillospirales	Oscillospiraceae	Faecousia	Faecousia sp017631155
RGVC209	RGIG9455	Illumina Sequencing	tRNA	Bacteria	Firmicutes_A	Clostridia	Oscillospirales	Oscillospiraceae	Faecousia
RGVC209	RUG14158	Rumen Superset	tRNA	Bacteria	Firmicutes_A	Clostridia	Oscillospirales	Oscillospiraceae	CAG-170	CAG-170 sp902796245
RGVC212	RGIG4709	Illumina Sequencing	tRNA	Bacteria	Firmicutes_A	Clostridia	Christensenellales	CAG-74	RGIG4709	RGIG4709 sp017481185
RGVC214	RGIG5036	Illumina Sequencing	tRNA	Bacteria	Firmicutes_A	Clostridia	Oscillospirales	Oscillospiraceae	RUG626	RUG626 sp017479425
RGVC215	RGIG4708	Illumina Sequencing	tRNA	Bacteria	Firmicutes_A	Clostridia	UMGS1810	UMGS1810	RGIG4708	RGIG4708 sp017481205
RGVC215	RGIG6216	Illumina Sequencing	tRNA	Bacteria	Firmicutes_A	Clostridia	UMGS1810	UMGS1810	RGIG1828
RGVC216	RGIG7464	Illumina Sequencing	tRNA	Bacteria	Firmicutes_A	Clostridia	Christensenellales	CAG-917	RGIG4097
RGVC221	RGIG7289	Illumina Sequencing	tRNA	Bacteria	Firmicutes_A	Clostridia	Oscillospirales	Acutalibacteraceae	Fimenecus
RGVC221	RGIG8015	Illumina Sequencing	tRNA	Bacteria	Firmicutes_A	Clostridia	Oscillospirales	Acutalibacteraceae	CAG-177	CAG-177 sp016285645
RGVC221	RUG14926	Rumen Superset	tRNA	Bacteria	Firmicutes_A	Clostridia	Oscillospirales	Ruminococcaceae	Ruminococcus	Ruminococcus flavefaciens_R
RGVC226	RGIG7318	Illumina Sequencing	tRNA	Bacteria	Firmicutes_A	Clostridia	Christensenellales	CAG-74	Limiplasma	Limiplasma sp017547285
RGVC226	RUG11247	Rumen Superset	tRNA	Bacteria	Firmicutes_A	Clostridia	Christensenellales	CAG-74	RUG11247	RUG11247 sp902767315
RGVC226	RUG13367	Rumen Superset	tRNA	Bacteria	Firmicutes_A	Clostridia	Christensenellales	CAG-74	RUG563	RUG563 sp902788445
RGVC226	RUG14340	Rumen Superset	tRNA	Bacteria	Firmicutes_A	Clostridia	Christensenellales	CAG-74	UBA2862	UBA2862 sp902798105
RGVC226	RUG14874	Rumen Superset	tRNA	Bacteria	Firmicutes_A	Clostridia	Oscillospirales	Acutalibacteraceae	UBA1213	UBA1213 sp900319255
RGVC229	RGIG4888	Illumina Sequencing	tRNA	Bacteria	Bacteroidota	Bacteroidia	Bacteroidales	Bacteroidaceae	Prevotella	Prevotella sp900315545
RGVC229	RGIG9563	Illumina Sequencing	tRNA	Bacteria	Bacteroidota	Bacteroidia	Bacteroidales	Bacteroidaceae	Alloprevotella	Alloprevotella sp017628775
RGVC229	RUG11871	Rumen Superset	tRNA	Bacteria	Bacteroidota	Bacteroidia	Bacteroidales	Bacteroidaceae	Prevotella	Prevotella sp900315545
RGVC229	RUG14445	Rumen Superset	tRNA	Bacteria	Bacteroidota	Bacteroidia	Bacteroidales	Bacteroidaceae	Prevotella	Prevotella sp002350805
RGVC230	RUG14409	Rumen Superset	tRNA	Bacteria	Firmicutes	Bacilli	RF39	UBA660	UBA3789	UBA3789 sp902793315
RGVC230	SVA_102_bin56	Rumen Superset	tRNA	Bacteria	Firmicutes	Bacilli	RF39	UBA660	Coprovivens
RGVC233	RGIG2571	Illumina Sequencing	tRNA	Bacteria	Firmicutes_A	Clostridia	Christensenellales	CAG-74	Firm-10	Firm-10 sp017431365
RGVC233	RGIG8020	Illumina Sequencing	tRNA	Bacteria	Firmicutes_A	Clostridia	Christensenellales	CAG-74	Firm-10	Firm-10 sp017620115
RGVC233	RUG11732	Rumen Superset	tRNA	Bacteria	Firmicutes_A	Clostridia	Lachnospirales	Lachnospiraceae	CAG-791	CAG-791 sp900320325
RGVC233	RUG13861	Rumen Superset	tRNA	Bacteria	Firmicutes_A	Clostridia	Christensenellales	CAG-74	UBA2862	UBA2862 sp902793325
RGVC233	RUG14651	Rumen Superset	tRNA	Bacteria	Firmicutes_A	Clostridia	Christensenellales	CAG-138	RUG472	RUG472 sp902798825
RGVC234	RGIG1840	Illumina Sequencing	tRNA	Bacteria	Firmicutes	Bacilli	RF39	UBA660	RGIG1840	RGIG1840 sp017397745
RGVC234	RUG10537	Rumen Superset	tRNA	Bacteria	Firmicutes	Bacilli	RF39	UBA660	CAG-1000	CAG-1000 sp900313815
RGVC235	RUG13861	Rumen Superset	tRNA	Bacteria	Firmicutes_A	Clostridia	Christensenellales	CAG-74	UBA2862	UBA2862 sp902793325
RGVC236	RGIG5297	Illumina Sequencing	tRNA	Bacteria	Bacteroidota	Bacteroidia	Bacteroidales	Rikenellaceae	Alistipes
RGVC236	RGIG5438	Illumina Sequencing	tRNA	Bacteria	Bacteroidota	Bacteroidia	Bacteroidales	Rikenellaceae	Alistipes	Alistipes sp017502025
RGVC236	RGIG8998	Illumina Sequencing	tRNA	Bacteria	Bacteroidota	Bacteroidia	Bacteroidales	Rikenellaceae	Alistipes	Alistipes sp017399485
RGVC239	RGIG5193	Illumina Sequencing	tRNA	Bacteria	Firmicutes_A	Clostridia	Oscillospirales	Ruminococcaceae	UMGS1668	UMGS1668 sp017536625
RGVC240	RGIG3992	Illumina Sequencing	tRNA	Bacteria	Bacteroidota	Bacteroidia	Bacteroidales	Bacteroidaceae	Phocaeicola_A	Phocaeicola_A sp017451645
RGVC240	RGIG4248	Illumina Sequencing	tRNA	Bacteria	Bacteroidota	Bacteroidia	Bacteroidales	Paludibacteraceae	RF16	RF16 sp017461505
RGVC240	RGIG5323	Illumina Sequencing	tRNA	Bacteria	Bacteroidota	Bacteroidia	Bacteroidales	Bacteroidaceae	Phocaeicola_A	Phocaeicola_A sp017517605
RGVC240	RGIG6310	Illumina Sequencing	tRNA	Bacteria	Bacteroidota	Bacteroidia	Bacteroidales	Bacteroidaceae	Phocaeicola_A	Phocaeicola_A sp017521285
RGVC240	RGIG6315	Illumina Sequencing	tRNA	Bacteria	Bacteroidota	Bacteroidia	Bacteroidales	Bacteroidaceae	Phocaeicola_A	Phocaeicola_A sp017516265
RGVC240	RGIG7679	Illumina Sequencing	tRNA	Bacteria	Bacteroidota	Bacteroidia	Bacteroidales	Bacteroidaceae	Phocaeicola_A	Phocaeicola_A sp017560945
RGVC240	RGIG9835	Illumina Sequencing	tRNA	Bacteria	Bacteroidota	Bacteroidia	Bacteroidales	Paludibacteraceae	RGIG9608	RGIG9608 sp017648235
RGVC240	RGIG9874	Illumina Sequencing	tRNA	Bacteria	Bacteroidota	Bacteroidia	Bacteroidales	Paludibacteraceae	RGIG9608	RGIG9608 sp017547145
RGVC240	RUG12062	Rumen Superset	tRNA	Bacteria	Bacteroidota	Bacteroidia	Bacteroidales	Bacteroidaceae	UBA2918	UBA2918 sp002349865
RGVC240	RUG12213	Rumen Superset	tRNA	Bacteria	Bacteroidota	Bacteroidia	Bacteroidales	Bacteroidaceae	UBA4293	UBA4293 sp900316585
RGVC240	RUG12556	Rumen Superset	tRNA	Bacteria	Bacteroidota	Bacteroidia	Bacteroidales	SZUA-534	RUG13583	RUG13583 sp902790595
RGVC240	RUG13921	Rumen Superset	tRNA	Bacteria	Bacteroidota	Bacteroidia	Bacteroidales	Bacteroidaceae	Ga6A1	Ga6A1 sp900102385
RGVC240	RUG14614	Rumen Superset	tRNA	Bacteria	Bacteroidota	Bacteroidia	Bacteroidales	Bacteroidaceae	UBA1179	UBA1179 sp902774335
RGVC240	SOL_BACT25	Rumen Superset	tRNA	Bacteria	Bacteroidota	Bacteroidia	Bacteroidales	Bacteroidaceae	UBA4334	UBA4334 sp017448825
RGVC240	SOL_BACT27	Rumen Superset	tRNA	Bacteria	Bacteroidota	Bacteroidia	Bacteroidales	Bacteroidaceae	UBA6382	UBA6382 sp902788275
RGVC240	SVA_105_bin16	Rumen Superset	tRNA	Bacteria	Bacteroidota	Bacteroidia	Bacteroidales	Bacteroidaceae	UBA3839
RGVC240	UBA2448	Rumen Superset	tRNA	Bacteria	Bacteroidota	Bacteroidia	Bacteroidales	Bacteroidaceae	UBA4334	UBA4334 sp002342585
RGVC240	UBA4359	Rumen Superset	tRNA	Bacteria	Bacteroidota	Bacteroidia	Bacteroidales	Bacteroidaceae	UBA4334	UBA4334 sp002393555
RGVC248	RGIG3155	Illumina Sequencing	tRNA	Bacteria	Firmicutes_B	Dehalobacteriia	UBA4068	UBA4068	RGIG3155	RGIG3155 sp017440145
RGVC248	RGIG4660	Illumina Sequencing	tRNA	Bacteria	Firmicutes_A	Clostridia	Oscillospirales	Ruminococcaceae	UBA1762	UBA1762 sp017472965
RGVC249	RGIG1529	Illumina Sequencing	tRNA	Bacteria	Firmicutes_A	Clostridia	Christensenellales	CAG-138	PeH17	PeH17 sp017395105
RGVC249	RGIG1780	Illumina Sequencing	tRNA	Bacteria	Firmicutes_A	Clostridia	Christensenellales	CAG-138	UBA1685	UBA1685 sp017435905
RGVC249	RGIG2948	Illumina Sequencing	tRNA	Bacteria	Firmicutes_A	Clostridia	Christensenellales	CAG-138	UBA1685	UBA1685 sp017435905
RGVC249	RGIG5189	Illumina Sequencing	tRNA	Bacteria	Firmicutes_A	Clostridia	Christensenellales	CAG-138	SFEL01
RGVC249	RGIG6260	Illumina Sequencing	tRNA	Bacteria	Firmicutes_A	Clostridia	Christensenellales	CAG-138	SFEL01
RGVC249	RGIG6858	Illumina Sequencing	tRNA	Bacteria	Firmicutes_A	Clostridia	Oscillospirales	Oscillospiraceae	UBA738	UBA738 sp017541825
RGVC249	RGIG8038	Illumina Sequencing	tRNA	Bacteria	Firmicutes_A	Clostridia	Christensenellales	CAG-138	UBA3857	UBA3857 sp017619735
RGVC249	RUG13181	Rumen Superset	tRNA	Bacteria	Firmicutes_A	Clostridia	Christensenellales	CAG-138	RUG472	RUG472 sp902786465
RGVC250	RGIG2052	Illumina Sequencing	tRNA	Bacteria	Firmicutes_A	Clostridia	Christensenellales	CAG-74	Ventricola	Ventricola sp017436605
RGVC250	RGIG7282	Illumina Sequencing	tRNA	Bacteria	Firmicutes_A	Clostridia	Christensenellales	CAG-74	Ventricola	Ventricola sp017547805
RGVC250	RGIG8950	Illumina Sequencing	tRNA	Bacteria	Firmicutes_A	Clostridia	Christensenellales	CAG-74	Ventricola	Ventricola sp017938795
RGVC250	RUG14416	Rumen Superset	tRNA	Bacteria	Firmicutes_A	Clostridia	Christensenellales	CAG-138	RUG472	RUG472 sp902798825
RGVC252	RGIG4961	Illumina Sequencing	tRNA	Bacteria	Firmicutes_A	Clostridia	Oscillospirales	Oscillospiraceae	Dysosmobacter	Dysosmobacter sp017469475
RGVC254	RGIG5298	Illumina Sequencing	tRNA	Bacteria	Firmicutes_A	Clostridia	Oscillospirales	Acutalibacteraceae	UBA5905
RGVC254	RGIG6098	Illumina Sequencing	tRNA	Bacteria	Firmicutes_A	Clostridia	Oscillospirales	Acutalibacteraceae	RGIG6098	RGIG6098 sp017518415
RGVC254	RUG12215	Rumen Superset	tRNA	Bacteria	Firmicutes_A	Clostridia	Oscillospirales	Acutalibacteraceae	UBA1213	UBA1213 sp900322105
RGVC254	RUG12302	Rumen Superset	tRNA	Bacteria	Bacteroidota	Bacteroidia	Bacteroidales	UBA932	Cryptobacteroides	Cryptobacteroides sp900317925
RGVC254	RUG13570	Rumen Superset	tRNA	Bacteria	Firmicutes_A	Clostridia	Oscillospirales	Acutalibacteraceae	RUG420	RUG420 sp900317085
RGVC254	RUG14926	Rumen Superset	tRNA	Bacteria	Firmicutes_A	Clostridia	Oscillospirales	Ruminococcaceae	Ruminococcus	Ruminococcus flavefaciens_R
RGVC257	RGIG7298	Illumina Sequencing	tRNA	Bacteria	Bacteroidota	Bacteroidia	Bacteroidales	Bacteroidaceae	HGM04593	HGM04593 sp017547585
RGVC257	RGIG8594	Illumina Sequencing	tRNA	Bacteria	Bacteroidota	Bacteroidia	Bacteroidales	Muribaculaceae	Muribaculum	Muribaculum sp003150235
RGVC257	SOL_BACT27	Rumen Superset	tRNA	Bacteria	Bacteroidota	Bacteroidia	Bacteroidales	Bacteroidaceae	UBA6382	UBA6382 sp902788275
RGVC257	SVA_105_bin7	Rumen Superset	tRNA	Bacteria	Bacteroidota	Bacteroidia	Bacteroidales	Bacteroidaceae	UBA3839
RGVC257	UBA1746	Rumen Superset	tRNA	Bacteria	Bacteroidota	Bacteroidia	Bacteroidales	Bacteroidaceae	Alloprevotella	Alloprevotella sp002314875
RGVC257	UBA4359	Rumen Superset	tRNA	Bacteria	Bacteroidota	Bacteroidia	Bacteroidales	Bacteroidaceae	UBA4334	UBA4334 sp002393555
RGVC260	RGIG5427	Illumina Sequencing	tRNA	Bacteria	Firmicutes_A	Clostridia	Oscillospirales	Oscillospiraceae	Lawsonibacter	Lawsonibacter sp017502285
RGVC260	RUG11462	Rumen Superset	tRNA	Bacteria	Firmicutes_A	Clostridia	Oscillospirales	Acutalibacteraceae	RUG11462	RUG11462 sp902769255
RGVC260	RUG12287	Rumen Superset	tRNA	Bacteria	Firmicutes_A	Clostridia	Oscillospirales	Oscillospiraceae	Limivicinus
RGVC260	RUG13604	Rumen Superset	tRNA	Bacteria	Firmicutes_A	Clostridia	Oscillospirales	Oscillospiraceae	Evtepia	Evtepia sp902781745
RGVC260	RUG14822	Rumen Superset	tRNA	Bacteria	Firmicutes_A	Clostridia	Oscillospirales	Acutalibacteraceae	UBA1213	UBA1213 sp902802985
RGVC262	RGIG7152	Illumina Sequencing	tRNA	Bacteria	Firmicutes_A	Clostridia	Oscillospirales	Acutalibacteraceae	UBA1227	UBA1227 sp017538005
RGVC262	RGIG8579	Illumina Sequencing	tRNA	Bacteria	Firmicutes_A	Clostridia	Oscillospirales	Acutalibacteraceae	UBA737	UBA737 sp017624675
RGVC262	RUG10608	Rumen Superset	tRNA	Bacteria	Firmicutes_A	Clostridia	Oscillospirales	Acutalibacteraceae	UBA737	UBA737 sp902762875
RGVC262	RUG13342	Rumen Superset	tRNA	Bacteria	Firmicutes_A	Clostridia	Oscillospirales	Acutalibacteraceae	UBA737	UBA737 sp902762875
RGVC262	RUG13848	Rumen Superset	tRNA	Bacteria	Firmicutes_A	Clostridia	Oscillospirales	Acutalibacteraceae	CAG-964	CAG-964 sp900316615
RGVC264	RGIG3156	Illumina Sequencing	tRNA	Bacteria	Bacteroidota	Bacteroidia	Bacteroidales	Bacteroidaceae	Phocaeicola_A	Phocaeicola_A sp017516265
RGVC264	RGIG5323	Illumina Sequencing	tRNA	Bacteria	Bacteroidota	Bacteroidia	Bacteroidales	Bacteroidaceae	Phocaeicola_A	Phocaeicola_A sp017517605
RGVC264	RGIG9835	Illumina Sequencing	tRNA	Bacteria	Bacteroidota	Bacteroidia	Bacteroidales	Paludibacteraceae	RGIG9608	RGIG9608 sp017648235
RGVC264	RUG12062	Rumen Superset	tRNA	Bacteria	Bacteroidota	Bacteroidia	Bacteroidales	Bacteroidaceae	UBA2918	UBA2918 sp002349865
RGVC264	UBA4359	Rumen Superset	tRNA	Bacteria	Bacteroidota	Bacteroidia	Bacteroidales	Bacteroidaceae	UBA4334	UBA4334 sp002393555
RGVC269	RGIG5323	Illumina Sequencing	tRNA	Bacteria	Bacteroidota	Bacteroidia	Bacteroidales	Bacteroidaceae	Phocaeicola_A	Phocaeicola_A sp017517605
RGVC269	RGIG6315	Illumina Sequencing	tRNA	Bacteria	Bacteroidota	Bacteroidia	Bacteroidales	Bacteroidaceae	Phocaeicola_A	Phocaeicola_A sp017516265
RGVC272	RGIG3019	Illumina Sequencing	tRNA	Bacteria	Firmicutes_A	Clostridia	Oscillospirales	JAAYXM01	SIG480	SIG480 sp017409405
RGVC272	RGIG3985	Illumina Sequencing	tRNA	Bacteria	Firmicutes_A	Clostridia	Oscillospirales	Oscillospiraceae	Faecousia
RGVC272	RGIG6484	Illumina Sequencing	tRNA	Bacteria	Firmicutes_A	Clostridia	Oscillospirales	Oscillospiraceae	RGIG3566	RGIG3566 sp017501805
RGVC272	RGIG7290	Illumina Sequencing	tRNA	Bacteria	Firmicutes_A	Clostridia	Oscillospirales	Ruminococcaceae	UMGS1668	UMGS1668 sp017547705
RGVC273	RGIG2233	Illumina Sequencing	tRNA	Bacteria	Patescibacteria	Saccharimonadia	Saccharimonadales	Nanosyncoccaceae	Nanosyncoccus	Nanosyncoccus sp017404685
RGVC273	RGIG8698	Illumina Sequencing	tRNA	Bacteria	Firmicutes_A	Clostridia	Oscillospirales	Acutalibacteraceae	UMGS1279	UMGS1279 sp017622415
RGVC273	RUG13671	Rumen Superset	tRNA	Bacteria	Firmicutes_A	Clostridia	Monoglobales	Monoglobaceae	UMGS1820	UMGS1820 sp902791425
RGVC273	RUG14178	Rumen Superset	tRNA	Bacteria	Firmicutes_A	Clostridia	UBA1381	UBA1381	Ornithomonoglobus	Ornithomonoglobus sp902796445
RGVC276	RGIG5998	Illumina Sequencing	tRNA	Bacteria	Firmicutes_A	Clostridia	Oscillospirales	Ruminococcaceae	HUN007	HUN007 sp017438745
RGVC276	RGIG6308	Illumina Sequencing	tRNA	Bacteria	Firmicutes_A	Clostridia	Oscillospirales	Acutalibacteraceae	UBA6857	UBA6857 sp017516315
RGVC276	RGIG8540	Illumina Sequencing	tRNA	Bacteria	Firmicutes_A	Clostridia	Oscillospirales	Ruminococcaceae	Ruminiclostridium_E	Ruminiclostridium_E sp017625405
RGVC276	RUG11462	Rumen Superset	tRNA	Bacteria	Firmicutes_A	Clostridia	Oscillospirales	Acutalibacteraceae	RUG11462	RUG11462 sp902769255
RGVC276	RUG11941	Rumen Superset	tRNA	Bacteria	Firmicutes_A	Clostridia	Oscillospirales	Acutalibacteraceae	RGIG2774	RGIG2774 sp902774165
RGVC276	RUG12471	Rumen Superset	tRNA	Bacteria	Firmicutes_A	Clostridia	Oscillospirales	Acutalibacteraceae	Fimenecus	Fimenecus sp900315985
RGVC276	RUG13848	Rumen Superset	tRNA	Bacteria	Firmicutes_A	Clostridia	Oscillospirales	Acutalibacteraceae	CAG-964	CAG-964 sp900316615
RGVC276	RUG14782	Rumen Superset	tRNA	Bacteria	Firmicutes_A	Clostridia	Oscillospirales	Acutalibacteraceae	Ruminococcus_E	Ruminococcus_E sp900317315
RGVC276	RUG14847	Rumen Superset	tRNA	Bacteria	Firmicutes_A	Clostridia	Oscillospirales	Acutalibacteraceae	CAG-177	CAG-177 sp902796295
RGVC276	RUG14874	Rumen Superset	tRNA	Bacteria	Firmicutes_A	Clostridia	Oscillospirales	Acutalibacteraceae	UBA1213	UBA1213 sp900319255
RGVC277	RGIG889	Illumina Sequencing	tRNA	Bacteria	Bacteroidota	Bacteroidia	Bacteroidales	Rikenellaceae	Alistipes	Alistipes sp900770585
RGVC277	RGIG9868	Illumina Sequencing	tRNA	Bacteria	Bacteroidota	Bacteroidia	Bacteroidales	Rikenellaceae	Alistipes	Alistipes sp017647625
RGVC277	UBA1746	Rumen Superset	tRNA	Bacteria	Bacteroidota	Bacteroidia	Bacteroidales	Bacteroidaceae	Alloprevotella	Alloprevotella sp002314875
RGVC281	RGIG10305	Illumina Sequencing	tRNA	Bacteria	Firmicutes_A	Clostridia	Christensenellales	Borkfalkiaceae	RGIG4074
RGVC281	RGIG1746	Illumina Sequencing	tRNA	Bacteria	Firmicutes_A	Clostridia	Christensenellales	Borkfalkiaceae	UBA1259	UBA1259 sp017399035
RGVC281	RGIG3314	Illumina Sequencing	tRNA	Bacteria	Firmicutes_A	Clostridia	Christensenellales	Borkfalkiaceae	UBA1259
RGVC281	RGIG4105	Illumina Sequencing	tRNA	Bacteria	Firmicutes_A	Clostridia	Christensenellales	Borkfalkiaceae	UBA1259	UBA1259 sp017467345
RGVC281	RGIG5378	Illumina Sequencing	tRNA	Bacteria	Firmicutes_A	Clostridia	Christensenellales	Borkfalkiaceae	UBA1259	UBA1259 sp017503265
RGVC281	RGIG7786	Illumina Sequencing	tRNA	Bacteria	Firmicutes_A	Clostridia	Christensenellales	Borkfalkiaceae	UBA1259	UBA1259 sp017554545
RGVC281	RGIG8226	Illumina Sequencing	tRNA	Bacteria	Firmicutes_A	Clostridia	Christensenellales	Borkfalkiaceae	UBA1259	UBA1259 sp017615975
RGVC281	RGIG8253	Illumina Sequencing	tRNA	Bacteria	Firmicutes_A	Clostridia	Christensenellales	CAG-1252	CAG-1252	CAG-1252 sp017615495
RGVC281	RGIG8279	Illumina Sequencing	tRNA	Bacteria	Firmicutes_A	Clostridia	Oscillospirales	CAG-272	RGIG6816
RGVC281	RGIG8722	Illumina Sequencing	tRNA	Bacteria	Firmicutes_A	Clostridia	Christensenellales	Borkfalkiaceae	UBA1259	UBA1259 sp017621955
RGVC281	RUG11243	Rumen Superset	tRNA	Bacteria	Firmicutes_A	Clostridia	Christensenellales	Borkfalkiaceae	UBA1259	UBA1259 sp902767225
RGVC282	RGIG6289	Illumina Sequencing	tRNA	Bacteria	Firmicutes_A	Clostridia	Oscillospirales	Oscillospiraceae	Faecousia	Faecousia sp017521485
RGVC282	RGIG7498	Illumina Sequencing	tRNA	Bacteria	Firmicutes_A	Clostridia	Oscillospirales	Oscillospiraceae	Faecousia
RGVC282	RGIG8705	Illumina Sequencing	tRNA	Bacteria	Firmicutes_A	Clostridia	Oscillospirales	Oscillospiraceae	Faecousia	Faecousia sp017622295
RGVC282	RGIG8797	Illumina Sequencing	tRNA	Bacteria	Firmicutes_A	Clostridia	Oscillospirales	Oscillospiraceae	Faecousia	Faecousia sp017620525
RGVC282	RUG13751	Rumen Superset	tRNA	Bacteria	Firmicutes_A	Clostridia	Oscillospirales	Oscillospiraceae	Faecousia	Faecousia sp900316335
RGVC282	RUG14158	Rumen Superset	tRNA	Bacteria	Firmicutes_A	Clostridia	Oscillospirales	Oscillospiraceae	CAG-170	CAG-170 sp902796245
RGVC282	RUG14822	Rumen Superset	tRNA	Bacteria	Firmicutes_A	Clostridia	Oscillospirales	Acutalibacteraceae	UBA1213	UBA1213 sp902802985
RGVC284	RGIG2180	Illumina Sequencing	tRNA	Bacteria	Firmicutes_A	Clostridia	Oscillospirales	JAAYXM01	SIG480	SIG480 sp017408185
RGVC285	RUG14651	Rumen Superset	tRNA	Bacteria	Firmicutes_A	Clostridia	Christensenellales	CAG-138	RUG472	RUG472 sp902798825
RGVC285	RUG14713	Rumen Superset	tRNA	Bacteria	Firmicutes_A	Clostridia	Christensenellales	CAG-138	RUG472	RUG472 sp902801845
RGVC286	RGIG7329	Illumina Sequencing	tRNA	Bacteria	Firmicutes_A	Clostridia	Oscillospirales	Oscillospiraceae	Dysosmobacter	Dysosmobacter sp017547085
RGVC290	HUN_Clostridium_innocuum_strain_NLAE_zl_G197_Ga0066900_101	Rumen Superset	tRNA	Bacteria	Firmicutes	Bacilli	Erysipelotrichales	Erysipelotrichaceae	Clostridium_AQ	Clostridium_AQ innocuum
RGVC290	RGIG2884	Illumina Sequencing	tRNA	Bacteria	Firmicutes	Bacilli	Acholeplasmatales	Anaeroplasmataceae	Anaeroplasma	Anaeroplasma sp017441525
RGVC290	RUG13081	Rumen Superset	tRNA	Bacteria	Firmicutes	Bacilli	Erysipelotrichales	Coprobacillaceae	Intestinibaculum	Intestinibaculum porci
RGVC291	RGIG1996	Illumina Sequencing	CRISPR	Bacteria	Firmicutes_A	Clostridia	Oscillospirales	CAG-272	CAG-448	CAG-448 sp017420845
RGVC291	RGIG9597	Illumina Sequencing	tRNA	Bacteria	Firmicutes_A	Clostridia	Oscillospirales	CAG-272	RGIG3925	RGIG3925 sp017628075
RGVC292	RGIG385	Illumina Sequencing	tRNA	Bacteria	Firmicutes_A	Clostridia	Oscillospirales	Acutalibacteraceae	Ruminococcus_E	Ruminococcus_E sp017380355
RGVC292	RUG14654	Rumen Superset	tRNA	Bacteria	Firmicutes_A	Clostridia	Oscillospirales	Oscillospiraceae	Limivicinus	Limivicinus sp902801295
RGVC293	RUG13638	Rumen Superset	CRISPR	Bacteria	Firmicutes	Bacilli	Erysipelotrichales	Erysipelotrichaceae	Bulleidia	Bulleidia timonensis
RGVC294	RGIG6306	Illumina Sequencing	tRNA	Bacteria	Firmicutes_A	Clostridia	Christensenellales	QALW01	UMGS1338	UMGS1338 sp017516345
RGVC294	RGIG8722	Illumina Sequencing	tRNA	Bacteria	Firmicutes_A	Clostridia	Christensenellales	Borkfalkiaceae	UBA1259	UBA1259 sp017621955
RGVC294	RUG11138	Rumen Superset	tRNA	Bacteria	Firmicutes_A	Clostridia	Christensenellales	Borkfalkiaceae	UBA4636	UBA4636 sp900770945
RGVC298	RGIG3027	Illumina Sequencing	tRNA	Bacteria	Firmicutes_A	Clostridia	Christensenellales	CAG-74	Ventricola	Ventricola sp017436605
RGVC298	RUG13282	Rumen Superset	tRNA	Bacteria	Firmicutes_A	Clostridia	Christensenellales	CAG-74	UBA2862	UBA2862 sp900317565
RGVC298	RUG14473	Rumen Superset	tRNA	Bacteria	Firmicutes_A	Clostridia	Christensenellales	CAG-74	UBA2862	UBA2862 sp902799465
RGVC298	RUG14874	Rumen Superset	tRNA	Bacteria	Firmicutes_A	Clostridia	Oscillospirales	Acutalibacteraceae	UBA1213	UBA1213 sp900319255
RGVC300	RGIG5356	Illumina Sequencing	tRNA	Bacteria	Firmicutes_A	Clostridia	Oscillospirales	Acutalibacteraceae	RUG806	RUG806 sp015066205
RGVC300	RUG10026	Rumen Superset	tRNA	Bacteria	Firmicutes_A	Clostridia	Christensenellales	RUG350	RUG350	RUG350 sp900315995
RGVC300	RUG14178	Rumen Superset	tRNA	Bacteria	Firmicutes_A	Clostridia	UBA1381	UBA1381	Ornithomonoglobus	Ornithomonoglobus sp902796445
RGVC303	RGIG4216	Illumina Sequencing	tRNA	Bacteria	Bacteroidota	Bacteroidia	Bacteroidales	Bacteroidaceae	RGIG8745
RGVC303	RGIG4234	Illumina Sequencing	tRNA	Bacteria	Bacteroidota	Bacteroidia	Bacteroidales	Bacteroidaceae	Bacteroides	Bacteroides sp017621035
RGVC303	RGIG4759	Illumina Sequencing	tRNA	Bacteria	Bacteroidota	Bacteroidia	Bacteroidales	Bacteroidaceae	Bacteroides	Bacteroides sp017471925
RGVC303	RGIG5296	Illumina Sequencing	tRNA	Bacteria	Fibrobacterota	Fibrobacteria	Fibrobacterales	Fibrobacteraceae	Fibrobacter	Fibrobacter sp900143055
RGVC303	RGIG7224	Illumina Sequencing	tRNA	Bacteria	Bacteroidota	Bacteroidia	Bacteroidales	Bacteroidaceae	Bacteroides	Bacteroides sp017556595
RGVC303	RGIG8480	Illumina Sequencing	tRNA	Bacteria	Bacteroidota	Bacteroidia	Bacteroidales	Bacteroidaceae	Phocaeicola	Phocaeicola sartorii
RGVC303	RGIG8665	Illumina Sequencing	tRNA	Bacteria	Bacteroidota	Bacteroidia	Bacteroidales	Bacteroidaceae	Phocaeicola	Phocaeicola dorei
RGVC303	RGIG8960	Illumina Sequencing	tRNA	Bacteria	Bacteroidota	Bacteroidia	Bacteroidales	Tannerellaceae	Parabacteroides	Parabacteroides johnsonii
RGVC303	RGIG9537	Illumina Sequencing	tRNA	Bacteria	Bacteroidota	Bacteroidia	Bacteroidales	Bacteroidaceae	UBA4372	UBA4372 sp017379075
RGVC303	RGIG9872	Illumina Sequencing	tRNA	Bacteria	Bacteroidota	Bacteroidia	Bacteroidales	Bacteroidaceae	UBA1189
RGVC304	RGIG4685	Illumina Sequencing	tRNA	Bacteria	Firmicutes_A	Clostridia	Oscillospirales	CAG-272	RGIG2000	RGIG2000 sp017472695
RGVC304	RGIG5464	Illumina Sequencing	tRNA	Bacteria	Firmicutes_A	Clostridia	Oscillospirales	CAG-272	RGIG2000	RGIG2000 sp017501545
RGVC304	RGIG8508	Illumina Sequencing	tRNA	Bacteria	Firmicutes_A	Clostridia	Oscillospirales	CAG-272	RGIG2000	RGIG2000 sp017625915
RGVC304	RGIG8561	Illumina Sequencing	tRNA	Bacteria	Firmicutes_A	Clostridia	Oscillospirales	CAG-272	RGIG2000	RGIG2000 sp017625915
RGVC304	RGIG9432	Illumina Sequencing	tRNA	Bacteria	Firmicutes_A	Clostridia	Oscillospirales	CAG-272	UBA1740	UBA1740 sp017631325
RGVC304	RGIG955	Illumina Sequencing	tRNA	Bacteria	Firmicutes_A	Clostridia	Oscillospirales	CAG-272	SIG710
RGVC306	RGIG5767	Illumina Sequencing	tRNA	Bacteria	Firmicutes	Bacilli	RF39	UBA660	RUG11198
RGVC306	RUG14702	Rumen Superset	tRNA	Bacteria	Firmicutes	Bacilli	RF39	UBA660	RUG12438	RUG12438 sp902801685
RGVC306	SVA_102_bin56	Rumen Superset	tRNA	Bacteria	Firmicutes	Bacilli	RF39	UBA660	Coprovivens
RGVC307	HUN_Bacteroides_vulgatus_strain_NLAE_zl_G202	Rumen Superset	tRNA	Bacteria	Bacteroidota	Bacteroidia	Bacteroidales	Bacteroidaceae	Phocaeicola	Phocaeicola vulgatus
RGVC307	RGIG8777	Illumina Sequencing	tRNA	Bacteria	Bacteroidota	Bacteroidia	Bacteroidales	Bacteroidaceae	Bacteroides	Bacteroides uniformis
RGVC307	RGIG9874	Illumina Sequencing	tRNA	Bacteria	Bacteroidota	Bacteroidia	Bacteroidales	Paludibacteraceae	RGIG9608	RGIG9608 sp017547145
RGVC307	SVA_105_bin68	Rumen Superset	tRNA	Bacteria	Bacteroidota	Bacteroidia	Bacteroidales	Bacteroidaceae	UBA4372
RGVC308	RUG12483	Rumen Superset	tRNA	Bacteria	Firmicutes_A	Clostridia	Lachnospirales	Lachnospiraceae	UBA1712	UBA1712 sp902779505
RGVC311	RGIG4226	Illumina Sequencing	tRNA	Bacteria	Bacteroidota	Bacteroidia	Bacteroidales	Rikenellaceae	Alistipes	Alistipes sp017465055
RGVC311	RGIG8749	Illumina Sequencing	tRNA	Bacteria	Bacteroidota	Bacteroidia	Bacteroidales	Rikenellaceae	Alistipes	Alistipes sp017621455
RGVC311	RGIG9075	Illumina Sequencing	tRNA	Bacteria	Bacteroidota	Bacteroidia	Bacteroidales	Rikenellaceae	UBA940	UBA940 sp017936385
RGVC311	RGIG9547	Illumina Sequencing	tRNA	Bacteria	Bacteroidota	Bacteroidia	Bacteroidales	Rikenellaceae	Alistipes	Alistipes sp017629035
RGVC311	RGIG9870	Illumina Sequencing	tRNA	Bacteria	Bacteroidota	Bacteroidia	Bacteroidales	Rikenellaceae	Alistipes	Alistipes sp017629035
RGVC311	RUG12011	Rumen Superset	tRNA	Bacteria	Bacteroidota	Bacteroidia	Bacteroidales	Paludibacteraceae	Enterocola	Enterocola sp900316995
RGVC311	RUG12667	Rumen Superset	tRNA	Bacteria	Bacteroidota	Bacteroidia	Bacteroidales	Muribaculaceae	Sodaliphilus	Sodaliphilus pleomorphus
RGVC311	UBA4866	Rumen Superset	tRNA	Bacteria	Bacteroidota	Bacteroidia	Bacteroidales	P3	UBA10566	UBA10566 sp002399565
RGVC313	RGIG9052	Illumina Sequencing	tRNA	Bacteria	Firmicutes	Bacilli	RF39	UBA660	CAG-533	CAG-533 sp900553855
RGVC313	RUG11168	Rumen Superset	tRNA	Bacteria	Firmicutes	Bacilli	RF39	UBA660	CAG-533	CAG-533 sp902766545
RGVC313	RUG12853	Rumen Superset	tRNA	Bacteria	Firmicutes	Bacilli	RF39	UBA660	CAG-533	CAG-533 sp902783345
RGVC317	RGIG6308	Illumina Sequencing	tRNA	Bacteria	Firmicutes_A	Clostridia	Oscillospirales	Acutalibacteraceae	UBA6857	UBA6857 sp017516315
RGVC317	RGIG6395	Illumina Sequencing	tRNA	Bacteria	Firmicutes_A	Clostridia	Oscillospirales	Acutalibacteraceae	RUG806	RUG806 sp015065425
RGVC317	RGIG8029	Illumina Sequencing	tRNA	Bacteria	Firmicutes_A	Clostridia	Peptostreptococcales	Anaerovoracaceae	RUG13409	RUG13409 sp017619905
RGVC317	RGIG892	Illumina Sequencing	tRNA	Bacteria	Firmicutes_A	Clostridia	Oscillospirales	Acutalibacteraceae	UBA737
RGVC321	RGIG1694	Illumina Sequencing	tRNA	Bacteria	Firmicutes_A	Clostridia	Lachnospirales	Lachnospiraceae	RUG11237	RUG11237 sp017399445
RGVC321	RGIG2958	Illumina Sequencing	tRNA	Bacteria	Firmicutes_A	Clostridia	Lachnospirales	UBA1390
RGVC322	RGIG4469	Illumina Sequencing	tRNA	Bacteria	Firmicutes_A	Clostridia	Oscillospirales	Oscillospiraceae	Dysosmobacter	Dysosmobacter sp017469475
RGVC324	RGIG5042	Illumina Sequencing	tRNA	Bacteria	Firmicutes_A	Clostridia	Lachnospirales	Lachnospiraceae	Acetatifactor
RGVC324	RGIG9678	Illumina Sequencing	tRNA	Bacteria	Firmicutes_A	Clostridia	Lachnospirales	Lachnospiraceae	UBA1258	UBA1258 sp017651385
RGVC324	RUG12760	Rumen Superset	tRNA	Bacteria	Firmicutes_A	Clostridia	Lachnospirales	Lachnospiraceae	CAG-127	CAG-127 sp900319515
RGVC324	RUG14141	Rumen Superset	tRNA	Bacteria	Firmicutes_A	Clostridia	Lachnospirales	Lachnospiraceae	Acetatifactor	Acetatifactor sp902796105
RGVC324	RUG14833	Rumen Superset	tRNA	Bacteria	Firmicutes_A	Clostridia	Lachnospirales	Lachnospiraceae	UBA3766	UBA3766 sp902803015
RGVC324	RUG14938	Rumen Superset	tRNA	Bacteria	Firmicutes_A	Clostridia	Lachnospirales	Lachnospiraceae	RUG147	RUG147 sp900315495
RGVC324	SOL_BUTY24	Rumen Superset	tRNA	Bacteria	Firmicutes_A	Clostridia	Lachnospirales	Lachnospiraceae	Acetatifactor
RGVC325	RGIG348	Illumina Sequencing	tRNA	Bacteria	Bacteroidota	Bacteroidia	Bacteroidales	Rikenellaceae	Alistipes	Alistipes sp017391185
RGVC325	RGIG6517	Illumina Sequencing	tRNA	Bacteria	Bacteroidota	Bacteroidia	Bacteroidales	Rikenellaceae	Alistipes	Alistipes sp017531305
RGVC325	RGIG7366	Illumina Sequencing	tRNA	Bacteria	Bacteroidota	Bacteroidia	Bacteroidales	Rikenellaceae	Alistipes	Alistipes sp017546725
RGVC325	RGIG7381	Illumina Sequencing	tRNA	Bacteria	Bacteroidota	Bacteroidia	Bacteroidales	Rikenellaceae	Alistipes
RGVC325	RGIG941	Illumina Sequencing	tRNA	Bacteria	Bacteroidota	Bacteroidia	Bacteroidales	Rikenellaceae	Alistipes	Alistipes sp017391185
RGVC325	RGIG957	Illumina Sequencing	tRNA	Bacteria	Bacteroidota	Bacteroidia	Bacteroidales	Rikenellaceae	Alistipes	Alistipes sp017424405
RGVC325	RGIG9837	Illumina Sequencing	tRNA	Bacteria	Bacteroidota	Bacteroidia	Bacteroidales	Rikenellaceae	Alistipes
RGVC325	RGIG9916	Illumina Sequencing	tRNA	Bacteria	Bacteroidota	Bacteroidia	Bacteroidales	Rikenellaceae	Alistipes	Alistipes sp017631285
RGVC325	RUG12011	Rumen Superset	tRNA	Bacteria	Bacteroidota	Bacteroidia	Bacteroidales	Paludibacteraceae	Enterocola	Enterocola sp900316995
RGVC326	HUN_Oscillibacter_sp_PC13	Rumen Superset	tRNA	Bacteria	Firmicutes_A	Clostridia	Oscillospirales	Oscillospiraceae	Dysosmobacter	Dysosmobacter sp900115635
RGVC326	RGIG4469	Illumina Sequencing	tRNA	Bacteria	Firmicutes_A	Clostridia	Oscillospirales	Oscillospiraceae	Dysosmobacter	Dysosmobacter sp017469475
RGVC326	RGIG7329	Illumina Sequencing	tRNA	Bacteria	Firmicutes_A	Clostridia	Oscillospirales	Oscillospiraceae	Dysosmobacter	Dysosmobacter sp017547085
RGVC326	RUG11719	Rumen Superset	tRNA	Bacteria	Firmicutes_A	Clostridia	Oscillospirales	Oscillospiraceae	RUG626	RUG626 sp900317385
RGVC326	RUG13434	Rumen Superset	tRNA	Bacteria	Firmicutes_A	Clostridia	Oscillospirales	Oscillospiraceae	Limivicinus	Limivicinus sp900319275
RGVC326	RUG13964	Rumen Superset	tRNA	Bacteria	Firmicutes_A	Clostridia	Oscillospirales	Oscillospiraceae	Limivicinus	Limivicinus sp900320595
RGVC329	RGIG6289	Illumina Sequencing	tRNA	Bacteria	Firmicutes_A	Clostridia	Oscillospirales	Oscillospiraceae	Faecousia	Faecousia sp017521485
RGVC330	RGIG6287	Illumina Sequencing	tRNA	Bacteria	Planctomycetota	Planctomycetia	Pirellulales	Thermoguttaceae	RUG369
RGVC330	RGIG7461	Illumina Sequencing	tRNA	Bacteria	Planctomycetota	Planctomycetia	Pirellulales	Thermoguttaceae	RUG369	RUG369 sp017549085
RGVC330	RGIG7709	Illumina Sequencing	tRNA	Bacteria	Planctomycetota	Planctomycetia	Pirellulales	Thermoguttaceae	RUG369
RGVC332	RUG14702	Rumen Superset	tRNA	Bacteria	Firmicutes	Bacilli	RF39	UBA660	RUG12438	RUG12438 sp902801685
RGVC333	RUG13939	Rumen Superset	tRNA	Bacteria	Firmicutes_A	Clostridia	Christensenellales	CAG-74	RUG563	RUG563 sp900320085
RGVC335	RUG12024	Rumen Superset	tRNA	Bacteria	Bacteroidota	Bacteroidia	Bacteroidales	Bacteroidaceae	Prevotella	Prevotella sp902776665
RGVC335	RUG12572	Rumen Superset	tRNA	Bacteria	Bacteroidota	Bacteroidia	Bacteroidales	Bacteroidaceae	UBA4372	UBA4372 sp002494215
RGVC335	RUG14488	Rumen Superset	tRNA	Bacteria	Bacteroidota	Bacteroidia	Bacteroidales	Bacteroidaceae	Prevotella	Prevotella sp902799655
RGVC335	RUG14558	Rumen Superset	tRNA	Bacteria	Bacteroidota	Bacteroidia	Bacteroidales	Bacteroidaceae	UBA4372	UBA4372 sp900313335
RGVC335	RUG14592	Rumen Superset	tRNA	Bacteria	Bacteroidota	Bacteroidia	Bacteroidales	Bacteroidaceae	UBA4372	UBA4372 sp002494215
RGVC335	RUG14681	Rumen Superset	tRNA	Bacteria	Bacteroidota	Bacteroidia	Bacteroidales	Bacteroidaceae	UBA4372	UBA4372 sp902801485
RGVC335	SVA_105_bin67	Rumen Superset	tRNA	Bacteria	Bacteroidota	Bacteroidia	Bacteroidales	Bacteroidaceae	Prevotella
RGVC335	UBA4359	Rumen Superset	tRNA	Bacteria	Bacteroidota	Bacteroidia	Bacteroidales	Bacteroidaceae	UBA4334	UBA4334 sp002393555
RGVC335	UBA4866	Rumen Superset	tRNA	Bacteria	Bacteroidota	Bacteroidia	Bacteroidales	P3	UBA10566	UBA10566 sp002399565
RGVC338	RGIG3042	Illumina Sequencing	tRNA	Bacteria	Firmicutes_A	Clostridia	Oscillospirales	Acutalibacteraceae	DTU089	DTU089 sp017436285
RGVC338	RGIG5014	Illumina Sequencing	tRNA	Bacteria	Firmicutes_A	Clostridia	Oscillospirales	Acutalibacteraceae	RGIG2774	RGIG2774 sp017480115
RGVC338	RUG13058	Rumen Superset	tRNA	Bacteria	Firmicutes_A	Clostridia	Oscillospirales	Acutalibacteraceae	UBA1213	UBA1213 sp900317395
RGVC338	RUG14662	Rumen Superset	tRNA	Bacteria	Firmicutes_A	Clostridia	Oscillospirales	Acutalibacteraceae	RUG592	RUG592 sp902801245
RGVC343	RGIG5379	Illumina Sequencing	tRNA	Bacteria	Bacteroidota	Bacteroidia	Bacteroidales	Bacteroidaceae	Phocaeicola	Phocaeicola sp017503235
RGVC343	RGIG7785	Illumina Sequencing	tRNA	Bacteria	Bacteroidota	Bacteroidia	Bacteroidales	Bacteroidaceae	HGM04593	HGM04593 sp017554605
RGVC343	RUG10698	Rumen Superset	tRNA	Bacteria	Bacteroidota	Bacteroidia	Bacteroidales	Bacteroidaceae	Alloprevotella	Alloprevotella sp900321445
RGVC344	RGIG5297	Illumina Sequencing	tRNA	Bacteria	Bacteroidota	Bacteroidia	Bacteroidales	Rikenellaceae	Alistipes
RGVC344	RGIG5438	Illumina Sequencing	tRNA	Bacteria	Bacteroidota	Bacteroidia	Bacteroidales	Rikenellaceae	Alistipes	Alistipes sp017502025
RGVC344	RGIG8998	Illumina Sequencing	tRNA	Bacteria	Bacteroidota	Bacteroidia	Bacteroidales	Rikenellaceae	Alistipes	Alistipes sp017399485
RGVC345	RGIG8473	Illumina Sequencing	tRNA	Bacteria	Bacteroidota	Bacteroidia	Bacteroidales	UBA932	Cryptobacteroides	Cryptobacteroides sp017626555
RGVC345	UBA5889	Rumen Superset	tRNA	Bacteria	Bacteroidota	Bacteroidia	Bacteroidales	UBA932	Cryptobacteroides	Cryptobacteroides sp002314195
RGVC348	RGIG1694	Illumina Sequencing	tRNA	Bacteria	Firmicutes_A	Clostridia	Lachnospirales	Lachnospiraceae	RUG11237	RUG11237 sp017399445
RGVC348	RGIG3830	Illumina Sequencing	tRNA	Bacteria	Firmicutes_A	Clostridia	Oscillospirales	Oscillospiraceae	Faecousia	Faecousia sp017457285
RGVC348	RGIG4651	Illumina Sequencing	tRNA	Bacteria	Firmicutes_A	Clostridia	Oscillospirales	Oscillospiraceae	Faecousia	Faecousia sp017482385
RGVC348	RGIG9025	Illumina Sequencing	tRNA	Bacteria	Firmicutes_A	Clostridia	Oscillospirales	Oscillospiraceae	Dysosmobacter	Dysosmobacter sp017937405
RGVC351	RGIG6507	Illumina Sequencing	tRNA	Bacteria	Firmicutes_A	Clostridia	Oscillospirales	Oscillospiraceae	Faecousia
RGVC351	RGIG7498	Illumina Sequencing	tRNA	Bacteria	Firmicutes_A	Clostridia	Oscillospirales	Oscillospiraceae	Faecousia
RGVC351	RGIG8706	Illumina Sequencing	tRNA	Archaea	Halobacteriota	Methanomicrobia	Methanomicrobiales	Methanocorpusculaceae	Methanocorpusculum	Methanocorpusculum sp017622255
RGVC353	RGIG6428	Illumina Sequencing	tRNA	Bacteria	Firmicutes_A	Clostridia	UBA1381	UBA9506	UMGS755
RGVC353	RGIG7187	Illumina Sequencing	tRNA	Bacteria	Firmicutes_A	Clostridia	RUG12999	RUG12999	RGIG7450
RGVC353	RGIG7303	Illumina Sequencing	tRNA	Bacteria	Firmicutes_A	Clostridia	Oscillospirales	QAMX01	QAMX01
RGVC354	RGIG8959	Illumina Sequencing	tRNA	Bacteria	Firmicutes_A	Clostridia	Christensenellales	CAG-74	Limiplasma	Limiplasma sp017938645
RGVC356	RGIG9034	Illumina Sequencing	tRNA	Bacteria	Bacteroidota	Bacteroidia	Bacteroidales	Rikenellaceae	Alistipes	Alistipes sp015059805
RGVC356	RGIG9767	Illumina Sequencing	tRNA	Bacteria	Bacteroidota	Bacteroidia	Bacteroidales	SZUA-534	RUG13583	RUG13583 sp017557605
RGVC358	RGIG1833	Illumina Sequencing	tRNA	Bacteria	Firmicutes_A	Clostridia	Oscillospirales	Oscillospiraceae	Lawsonibacter	Lawsonibacter sp017397835
RGVC358	RGIG6437	Illumina Sequencing	tRNA	Bacteria	Firmicutes_A	Clostridia	Oscillospirales	QAMX01	RGIG1911	RGIG1911 sp017533425
RGVC358	RGIG9120	Illumina Sequencing	tRNA	Bacteria	Firmicutes_A	Clostridia	HGM11327	HGM11327	SIG351	SIG351 sp017935525
RGVC358	RUG11891	Rumen Superset	tRNA	Bacteria	Firmicutes_A	Clostridia	Oscillospirales	Oscillospiraceae	Evtepia	Evtepia sp902781745
RGVC363	RGIG4189	Illumina Sequencing	tRNA	Bacteria	Firmicutes_A	Clostridia	Oscillospirales	Oscillospiraceae	Faecousia
RGVC363	RUG14822	Rumen Superset	tRNA	Bacteria	Firmicutes_A	Clostridia	Oscillospirales	Acutalibacteraceae	UBA1213	UBA1213 sp902802985
RGVC365	RGIG10208	Illumina Sequencing	tRNA	Bacteria	Firmicutes_A	Clostridia	Christensenellales	CAG-1252	CAG-1252	CAG-1252 sp017961365
RGVC365	RGIG9076	Illumina Sequencing	tRNA	Bacteria	Firmicutes_A	Clostridia	Christensenellales	CAG-74	Ventricola	Ventricola sp017936375
RGVC367	RGIG6423	Illumina Sequencing	tRNA	Bacteria	Bacteroidota	Bacteroidia	Bacteroidales	Bacteroidaceae	HGM04593	HGM04593 sp017536325
RGVC367	RUG12213	Rumen Superset	tRNA	Bacteria	Bacteroidota	Bacteroidia	Bacteroidales	Bacteroidaceae	UBA4293	UBA4293 sp900316585
RGVC367	RUG13512	Rumen Superset	tRNA	Bacteria	Bacteroidota	Bacteroidia	Bacteroidales	Bacteroidaceae	UBA4372	UBA4372 sp902779165
RGVC368	RUG13751	Rumen Superset	tRNA	Bacteria	Firmicutes_A	Clostridia	Oscillospirales	Oscillospiraceae	Faecousia	Faecousia sp900316335
RGVC372	RGIG132	Illumina Sequencing	tRNA	Bacteria	Bacteroidota	Bacteroidia	Bacteroidales	Rikenellaceae	Alistipes	Alistipes sp017436185
RGVC372	RGIG3046	Illumina Sequencing	tRNA	Bacteria	Bacteroidota	Bacteroidia	Bacteroidales	Rikenellaceae	Alistipes	Alistipes sp017436185
RGVC372	RGIG370	Illumina Sequencing	tRNA	Bacteria	Bacteroidota	Bacteroidia	Bacteroidales	Rikenellaceae	Alistipes	Alistipes sp017436185
RGVC372	RGIG5318	Illumina Sequencing	tRNA	Bacteria	Bacteroidota	Bacteroidia	Bacteroidales	Rikenellaceae	Alistipes	Alistipes sp017504485
RGVC372	RGIG6334	Illumina Sequencing	tRNA	Bacteria	Bacteroidota	Bacteroidia	Bacteroidales	Rikenellaceae	Alistipes	Alistipes sp017624955
RGVC372	RGIG8565	Illumina Sequencing	tRNA	Bacteria	Bacteroidota	Bacteroidia	Bacteroidales	Rikenellaceae	Alistipes	Alistipes sp017624955
RGVC372	RGIG886	Illumina Sequencing	tRNA	Bacteria	Bacteroidota	Bacteroidia	Bacteroidales	Rikenellaceae	Alistipes
RGVC372	RGIG8936	Illumina Sequencing	tRNA	Bacteria	Bacteroidota	Bacteroidia	Bacteroidales	Rikenellaceae	Alistipes	Alistipes sp017442365
RGVC372	RGIG9569	Illumina Sequencing	tRNA	Bacteria	Bacteroidota	Bacteroidia	Bacteroidales	Rikenellaceae	Alistipes
RGVC372	RGIG961	Illumina Sequencing	tRNA	Bacteria	Bacteroidota	Bacteroidia	Bacteroidales	Rikenellaceae	Alistipes	Alistipes sp017436185
RGVC372	RGIG9853	Illumina Sequencing	tRNA	Bacteria	Bacteroidota	Bacteroidia	Bacteroidales	Rikenellaceae	Alistipes	Alistipes sp900769525
RGVC372	RGIG9870	Illumina Sequencing	tRNA	Bacteria	Bacteroidota	Bacteroidia	Bacteroidales	Rikenellaceae	Alistipes	Alistipes sp017629035
RGVC372	UBA4866	Rumen Superset	tRNA	Bacteria	Bacteroidota	Bacteroidia	Bacteroidales	P3	UBA10566	UBA10566 sp002399565
RGVC375	RUG13475	Rumen Superset	tRNA	Bacteria	Firmicutes_A	Clostridia	Lachnospirales	Lachnospiraceae	UBA6987	UBA6987 sp902789555
RGVC377	RGIG1908	Illumina Sequencing	tRNA	Bacteria	Firmicutes_A	Clostridia	Oscillospirales	CAG-272	RGIG3438
RGVC379	RGIG2101	Illumina Sequencing	tRNA	Bacteria	Firmicutes	Bacilli	RF39	UBA660	CAG-877	CAG-877 sp017409785
RGVC379	RUG10905	Rumen Superset	tRNA	Bacteria	Firmicutes	Bacilli	RF39	UBA660	CAG-302	CAG-302 sp002375205
RGVC379	RUG11198	Rumen Superset	tRNA	Bacteria	Firmicutes	Bacilli	RF39	UBA660	RUG11198	RUG11198 sp902766815
RGVC379	RUG14824	Rumen Superset	tRNA	Bacteria	Cyanobacteria	Vampirovibrionia	Gastranaerophilales	Gastranaerophilaceae	CAG-196	CAG-196 sp902802935
RGVC379	SVA_102_bin56	Rumen Superset	tRNA	Bacteria	Firmicutes	Bacilli	RF39	UBA660	Coprovivens
RGVC381	RGIG9884	Illumina Sequencing	tRNA	Bacteria	Bacteroidota	Bacteroidia	Bacteroidales	Bacteroidaceae	HGM04593	HGM04593 sp017646665
RGVC381	RUG10698	Rumen Superset	tRNA	Bacteria	Bacteroidota	Bacteroidia	Bacteroidales	Bacteroidaceae	Alloprevotella	Alloprevotella sp900321445
RGVC381	RUG13972	Rumen Superset	tRNA	Bacteria	Bacteroidota	Bacteroidia	Bacteroidales	Bacteroidaceae	Ga6A1	Ga6A1 sp900102385
RGVC383	RGIG2108	Illumina Sequencing	tRNA	Bacteria	Firmicutes_A	Clostridia	Lachnospirales	Lachnospiraceae	Faecalimonas
RGVC383	RGIG381	Illumina Sequencing	tRNA	Bacteria	Firmicutes_A	Clostridia	Oscillospirales	Oscillospiraceae	Faecousia	Faecousia sp017380435
RGVC383	RGIG4189	Illumina Sequencing	tRNA	Bacteria	Firmicutes_A	Clostridia	Oscillospirales	Oscillospiraceae	Faecousia
RGVC383	RGIG7279	Illumina Sequencing	tRNA	Bacteria	Firmicutes_A	Clostridia	Oscillospirales	Oscillospiraceae	Faecousia
RGVC383	RGIG7290	Illumina Sequencing	tRNA	Bacteria	Firmicutes_A	Clostridia	Oscillospirales	Ruminococcaceae	UMGS1668	UMGS1668 sp017547705
RGVC383	RGIG7498	Illumina Sequencing	tRNA	Bacteria	Firmicutes_A	Clostridia	Oscillospirales	Oscillospiraceae	Faecousia
RGVC383	RGIG8706	Illumina Sequencing	tRNA	Archaea	Halobacteriota	Methanomicrobia	Methanomicrobiales	Methanocorpusculaceae	Methanocorpusculum	Methanocorpusculum sp017622255
RGVC383	RGIG9400	Illumina Sequencing	tRNA	Bacteria	Firmicutes_A	Clostridia	Oscillospirales	Oscillospiraceae	Faecousia	Faecousia sp017632035
RGVC383	RGIG9441	Illumina Sequencing	tRNA	Bacteria	Firmicutes_A	Clostridia	Oscillospirales	Oscillospiraceae	Faecousia	Faecousia sp017631155
RGVC383	RGIG9881	Illumina Sequencing	tRNA	Bacteria	Firmicutes_A	Clostridia	Oscillospirales	Oscillospiraceae	Faecousia
RGVC386	RUG13475	Rumen Superset	tRNA	Bacteria	Firmicutes_A	Clostridia	Lachnospirales	Lachnospiraceae	UBA6987	UBA6987 sp902789555
RGVC388	RGIG6399	Illumina Sequencing	tRNA	Bacteria	Firmicutes_A	Clostridia	Lachnospirales	Lachnospiraceae	SFDP01	SFDP01 sp017520155
RGVC388	RGIG8670	Illumina Sequencing	tRNA	Bacteria	Firmicutes_A	Clostridia	Lachnospirales	Lachnospiraceae	CAG-510	CAG-510 sp017482205
RGVC388	RGIG989	Illumina Sequencing	tRNA	Bacteria	Firmicutes_A	Clostridia	Lachnospirales	Lachnospiraceae	RGIG989	RGIG989 sp017390525
RGVC391	RGIG4237	Illumina Sequencing	tRNA	Bacteria	Firmicutes_A	Clostridia	Oscillospirales	CAG-272	SIG710	SIG710 sp017461635
RGVC391	RGIG955	Illumina Sequencing	tRNA	Bacteria	Firmicutes_A	Clostridia	Oscillospirales	CAG-272	SIG710
RGVC392	RGIG9081	Illumina Sequencing	tRNA	Bacteria	Firmicutes_A	Clostridia	Christensenellales	CAG-74	SFTH01	SFTH01 sp017938785
RGVC392	RUG13861	Rumen Superset	tRNA	Bacteria	Firmicutes_A	Clostridia	Christensenellales	CAG-74	UBA2862	UBA2862 sp902793325
RGVC392	RUG14601	Rumen Superset	tRNA	Bacteria	Firmicutes_A	Clostridia	Christensenellales	CAG-74	UBA2862	UBA2862 sp902800625
RGVC393	RUG10597	Rumen Superset	tRNA	Bacteria	Bacteroidota	Bacteroidia	Bacteroidales	Bacteroidaceae	Prevotella	Prevotella sp002351725
RGVC393	RUG14357	Rumen Superset	tRNA	Bacteria	Bacteroidota	Bacteroidia	Bacteroidales	Bacteroidaceae	Prevotella	Prevotella sp902798285
RGVC393	RUG14568	Rumen Superset	tRNA	Bacteria	Bacteroidota	Bacteroidia	Bacteroidales	Bacteroidaceae	Prevotella	Prevotella sp902800365
RGVC393	RUG14669	Rumen Superset	tRNA	Bacteria	Bacteroidota	Bacteroidia	Bacteroidales	Bacteroidaceae	Prevotella	Prevotella sp900318685
RGVC393	RUG14726	Rumen Superset	tRNA	Bacteria	Bacteroidota	Bacteroidia	Bacteroidales	Bacteroidaceae	Prevotella	Prevotella sp900318395
RGVC393	RUG14797	Rumen Superset	tRNA	Bacteria	Bacteroidota	Bacteroidia	Bacteroidales	Bacteroidaceae	Prevotella	Prevotella sp900314995
RGVC393	RUG14919	Rumen Superset	tRNA	Bacteria	Bacteroidota	Bacteroidia	Bacteroidales	Bacteroidaceae	Prevotella	Prevotella sp900314455
RGVC393	SVA_105_bin38	Rumen Superset	tRNA	Bacteria	Bacteroidota	Bacteroidia	Bacteroidales	Bacteroidaceae	Prevotella
RGVC393	SVA_105_bin67	Rumen Superset	tRNA	Bacteria	Bacteroidota	Bacteroidia	Bacteroidales	Bacteroidaceae	Prevotella
RGVC393	SVA_106_bin57	Rumen Superset	tRNA	Bacteria	Bacteroidota	Bacteroidia	Bacteroidales	Bacteroidaceae	Prevotella
RGVC394	RGIG7395	Illumina Sequencing	tRNA	Bacteria	Firmicutes_A	Clostridia	Oscillospirales	Oscillospiraceae	RGIG7114
RGVC394	RGIG8933	Illumina Sequencing	tRNA	Bacteria	Firmicutes_A	Clostridia	Oscillospirales	Oscillospiraceae	Faecousia
RGVC395	RGIG7498	Illumina Sequencing	tRNA	Bacteria	Firmicutes_A	Clostridia	Oscillospirales	Oscillospiraceae	Faecousia
RGVC395	RGIG8706	Illumina Sequencing	tRNA	Archaea	Halobacteriota	Methanomicrobia	Methanomicrobiales	Methanocorpusculaceae	Methanocorpusculum	Methanocorpusculum sp017622255
RGVC401	RUG14549	Rumen Superset	tRNA	Bacteria	Firmicutes_A	Clostridia	Lachnospirales	Lachnospiraceae	CAG-127	CAG-127 sp902800325
RGVC402	RGIG1930	Illumina Sequencing	tRNA	Bacteria	Firmicutes_A	Clostridia	Christensenellales	Borkfalkiaceae	UBA1259	UBA1259 sp017414525
RGVC403	RGIG3150	Illumina Sequencing	tRNA	Bacteria	Firmicutes_A	Clostridia	Oscillospirales	Oscillospiraceae	Lawsonibacter
RGVC405	RGIG289	Illumina Sequencing	tRNA	Bacteria	Firmicutes_A	Clostridia	Oscillospirales	UBA644	RGIG995	RGIG995 sp017424085
RGVC405	RGIG8618	Illumina Sequencing	tRNA	Bacteria	Firmicutes_A	Clostridia	Oscillospirales	UBA644	RGIG995	RGIG995 sp017623895
RGVC405	RUG11462	Rumen Superset	tRNA	Bacteria	Firmicutes_A	Clostridia	Oscillospirales	Acutalibacteraceae	RUG11462	RUG11462 sp902769255
RGVC407	RGIG6289	Illumina Sequencing	tRNA	Bacteria	Firmicutes_A	Clostridia	Oscillospirales	Oscillospiraceae	Faecousia	Faecousia sp017521485
RGVC407	RGIG7290	Illumina Sequencing	tRNA	Bacteria	Firmicutes_A	Clostridia	Oscillospirales	Ruminococcaceae	UMGS1668	UMGS1668 sp017547705
RGVC407	RGIG7498	Illumina Sequencing	tRNA	Bacteria	Firmicutes_A	Clostridia	Oscillospirales	Oscillospiraceae	Faecousia
RGVC407	RGIG8578	Illumina Sequencing	tRNA	Bacteria	Firmicutes_A	Clostridia	Oscillospirales	Oscillospiraceae	Faecousia	Faecousia sp017624715
RGVC407	RGIG8706	Illumina Sequencing	tRNA	Archaea	Halobacteriota	Methanomicrobia	Methanomicrobiales	Methanocorpusculaceae	Methanocorpusculum	Methanocorpusculum sp017622255
RGVC407	RGIG9455	Illumina Sequencing	tRNA	Bacteria	Firmicutes_A	Clostridia	Oscillospirales	Oscillospiraceae	Faecousia
RGVC407	RGIG9881	Illumina Sequencing	tRNA	Bacteria	Firmicutes_A	Clostridia	Oscillospirales	Oscillospiraceae	Faecousia
RGVC408	RGIG3091	Illumina Sequencing	tRNA	Bacteria	Firmicutes	Bacilli	RF39	UBA660	RGIG3091	RGIG3091 sp017435255
RGVC410	RGIG6858	Illumina Sequencing	tRNA	Bacteria	Firmicutes_A	Clostridia	Oscillospirales	Oscillospiraceae	UBA738	UBA738 sp017541825
RGVC411	RGIG5845	Illumina Sequencing	tRNA	Bacteria	Firmicutes_A	Clostridia	TANB77	CAG-508	CAG-269
RGVC411	RGIG5890	Illumina Sequencing	tRNA	Bacteria	Firmicutes_A	Clostridia	TANB77	CAG-508	UMGS1994	UMGS1994 sp017510525
RGVC411	RGIG6881	Illumina Sequencing	tRNA	Bacteria	Firmicutes_A	Clostridia	TANB77	CAG-508	CAG-492
RGVC411	RGIG8360	Illumina Sequencing	tRNA	Bacteria	Firmicutes_A	Clostridia	TANB77	CAG-508	CAG-269	CAG-269 sp017613275
RGVC411	RGIG8482	Illumina Sequencing	tRNA	Bacteria	Firmicutes_A	Clostridia	TANB77	CAG-508	RGIG8482	RGIG8482 sp017626365
RGVC411	RGIG8869	Illumina Sequencing	tRNA	Bacteria	Firmicutes_A	Clostridia	TANB77	CAG-508	CAG-269
RGVC411	RGIG8938	Illumina Sequencing	tRNA	Bacteria	Firmicutes_A	Clostridia	TANB77	CAG-508	CAG-492	CAG-492 sp017939755
RGVC412	RGIG5296	Illumina Sequencing	tRNA	Bacteria	Fibrobacterota	Fibrobacteria	Fibrobacterales	Fibrobacteraceae	Fibrobacter	Fibrobacter sp900143055
RGVC412	RGIG8937	Illumina Sequencing	tRNA	Bacteria	Firmicutes_A	Clostridia	Oscillospirales	Oscillospiraceae	Faecousia	Faecousia sp017939025
RGVC412	RGIG893	Illumina Sequencing	tRNA	Bacteria	Bacteroidota	Bacteroidia	Bacteroidales	Muribaculaceae	RGIG4576	RGIG4576 sp017391675
RGVC414	RGIG1694	Illumina Sequencing	tRNA	Bacteria	Firmicutes_A	Clostridia	Lachnospirales	Lachnospiraceae	RUG11237	RUG11237 sp017399445
RGVC414	RGIG5310	Illumina Sequencing	tRNA	Bacteria	Firmicutes_A	Clostridia	Oscillospirales	CAG-272	CAG-448	CAG-448 sp017504625
RGVC414	RGIG5428	Illumina Sequencing	tRNA	Bacteria	Firmicutes_A	Clostridia	Oscillospirales	Oscillospiraceae	Faecousia	Faecousia sp017502265
RGVC414	RGIG7290	Illumina Sequencing	tRNA	Bacteria	Firmicutes_A	Clostridia	Oscillospirales	Ruminococcaceae	UMGS1668	UMGS1668 sp017547705
RGVC414	RGIG7498	Illumina Sequencing	tRNA	Bacteria	Firmicutes_A	Clostridia	Oscillospirales	Oscillospiraceae	Faecousia
RGVC414	RGIG7665	Illumina Sequencing	tRNA	Bacteria	Firmicutes_A	Clostridia	Oscillospirales	Oscillospiraceae	Faecousia
RGVC414	RGIG8706	Illumina Sequencing	tRNA	Archaea	Halobacteriota	Methanomicrobia	Methanomicrobiales	Methanocorpusculaceae	Methanocorpusculum	Methanocorpusculum sp017622255
RGVC414	RGIG9441	Illumina Sequencing	tRNA	Bacteria	Firmicutes_A	Clostridia	Oscillospirales	Oscillospiraceae	Faecousia	Faecousia sp017631155
RGVC414	RUG14822	Rumen Superset	tRNA	Bacteria	Firmicutes_A	Clostridia	Oscillospirales	Acutalibacteraceae	UBA1213	UBA1213 sp902802985
RGVC415	RGIG7481	Illumina Sequencing	tRNA	Bacteria	Firmicutes_A	Clostridia	Christensenellales	Borkfalkiaceae	UBA1259	UBA1259 sp017558105
RGVC417	RGIG4762	Illumina Sequencing	tRNA	Bacteria	Firmicutes_A	Clostridia	Christensenellales	Borkfalkiaceae	Scatosoma	Scatosoma sp017471785
RGVC417	RGIG5368	Illumina Sequencing	tRNA	Bacteria	Firmicutes_A	Clostridia	Christensenellales	Borkfalkiaceae	Scatosoma	Scatosoma sp017503525
RGVC417	RUG11243	Rumen Superset	tRNA	Bacteria	Firmicutes_A	Clostridia	Christensenellales	Borkfalkiaceae	UBA1259	UBA1259 sp902767225
RGVC420	RGIG3854	Illumina Sequencing	tRNA	Bacteria	Firmicutes_A	Clostridia	Oscillospirales	CAG-382	UMGS1387	UMGS1387 sp017456765
RGVC420	RGIG3973	Illumina Sequencing	tRNA	Bacteria	Firmicutes_A	Clostridia	Christensenellales	UBA1242	Caccovivens
RGVC420	RGIG4210	Illumina Sequencing	tRNA	Bacteria	Firmicutes_A	Clostridia	Christensenellales	UBA1242	Caccovivens
RGVC420	RGIG8962	Illumina Sequencing	tRNA	Bacteria	Firmicutes_A	Clostridia	Christensenellales	UBA1242	Caccovivens	Caccovivens sp017938505
RGVC421	RUG11582	Rumen Superset	tRNA	Bacteria	Bacteroidota	Bacteroidia	Bacteroidales	Bacteroidaceae	Prevotella	Prevotella sp900315775
RGVC421	RUG12354	Rumen Superset	tRNA	Bacteria	Bacteroidota	Bacteroidia	Bacteroidales	Bacteroidaceae	Prevotella	Prevotella sp902778255
RGVC421	RUG14519	Rumen Superset	tRNA	Bacteria	Bacteroidota	Bacteroidia	Bacteroidales	Bacteroidaceae	Prevotella	Prevotella sp902799905
RGVC421	RUG14525	Rumen Superset	tRNA	Bacteria	Bacteroidota	Bacteroidia	Bacteroidales	Bacteroidaceae	Prevotella	Prevotella sp902799975
RGVC421	RUG14585	Rumen Superset	tRNA	Bacteria	Bacteroidota	Bacteroidia	Bacteroidales	Bacteroidaceae	Prevotella	Prevotella sp902800585
RGVC421	SVA_102_bin76	Rumen Superset	tRNA	Bacteria	Bacteroidota	Bacteroidia	Bacteroidales	Bacteroidaceae	Prevotella
RGVC421	SVA_105_bin38	Rumen Superset	tRNA	Bacteria	Bacteroidota	Bacteroidia	Bacteroidales	Bacteroidaceae	Prevotella
RGVC423	RGIG2177	Illumina Sequencing	tRNA	Bacteria	Firmicutes_A	Clostridia	Lachnospirales	Anaerotignaceae	SIG274
RGVC425	RGIG407	Illumina Sequencing	tRNA	Bacteria	Firmicutes_A	Clostridia	Oscillospirales	Oscillospiraceae	Faecousia
RGVC425	RGIG9881	Illumina Sequencing	tRNA	Bacteria	Firmicutes_A	Clostridia	Oscillospirales	Oscillospiraceae	Faecousia
RGVC427	RGIG7100	Illumina Sequencing	tRNA	Bacteria	Firmicutes_A	Clostridia	Christensenellales	CAG-74	Firm-10	Firm-10 sp017620115
RGVC427	RUG10288	Rumen Superset	tRNA	Bacteria	Firmicutes_A	Clostridia	Christensenellales	CAG-138	UBA3792	UBA3792 sp900318745
RGVC427	RUG11088	Rumen Superset	tRNA	Bacteria	Firmicutes_A	Clostridia	Christensenellales	CAG-74	UBA2862	UBA2862 sp002350605
RGVC427	RUG14340	Rumen Superset	tRNA	Bacteria	Firmicutes_A	Clostridia	Christensenellales	CAG-74	UBA2862	UBA2862 sp902798105
RGVC429	RGIG1694	Illumina Sequencing	tRNA	Bacteria	Firmicutes_A	Clostridia	Lachnospirales	Lachnospiraceae	RUG11237	RUG11237 sp017399445
RGVC430	RUG14702	Rumen Superset	tRNA	Bacteria	Firmicutes	Bacilli	RF39	UBA660	RUG12438	RUG12438 sp902801685
RGVC432	RGIG8794	Illumina Sequencing	tRNA	Bacteria	Bacteroidota	Bacteroidia	Bacteroidales	Muribaculaceae	CAG-873	CAG-873 sp017620635
RGVC433	RGIG893	Illumina Sequencing	tRNA	Bacteria	Bacteroidota	Bacteroidia	Bacteroidales	Muribaculaceae	RGIG4576	RGIG4576 sp017391675
RGVC433	RGIG966	Illumina Sequencing	tRNA	Bacteria	Bacteroidota	Bacteroidia	Bacteroidales	Muribaculaceae	CAG-485	CAG-485 sp017547845
RGVC434	RGIG4213	Illumina Sequencing	tRNA	Bacteria	Firmicutes_A	Clostridia	Oscillospirales	Ruminococcaceae	Ruminiclostridium_E	Ruminiclostridium_E sp017624025
RGVC434	RGIG4664	Illumina Sequencing	tRNA	Bacteria	Firmicutes_A	Clostridia	Oscillospirales	Ruminococcaceae	Ruminiclostridium_E	Ruminiclostridium_E sp017472865
RGVC434	RGIG5032	Illumina Sequencing	tRNA	Bacteria	Firmicutes_A	Clostridia	Oscillospirales	Ruminococcaceae	Ruminiclostridium_E	Ruminiclostridium_E sp017479645
RGVC434	RGIG8615	Illumina Sequencing	tRNA	Bacteria	Firmicutes_A	Clostridia	Oscillospirales	Ruminococcaceae	Ruminiclostridium_E	Ruminiclostridium_E sp017624025
RGVC434	RUG13454	Rumen Superset	tRNA	Bacteria	Firmicutes_A	Clostridia	Oscillospirales	Ruminococcaceae	Ruminococcus	Ruminococcus sp002389995
RGVC438	RGIG7943	Illumina Sequencing	tRNA	Bacteria	Firmicutes_A	Clostridia	Oscillospirales	Oscillospiraceae	Limivicinus	Limivicinus sp017550765
RGVC438	RGIG9881	Illumina Sequencing	tRNA	Bacteria	Firmicutes_A	Clostridia	Oscillospirales	Oscillospiraceae	Faecousia
RGVC443	RGIG4208	Illumina Sequencing	tRNA	Bacteria	Bacteroidota	Bacteroidia	Bacteroidales	Bacteroidaceae	Phocaeicola	Phocaeicola sp017416735
RGVC443	RGIG5296	Illumina Sequencing	tRNA	Bacteria	Fibrobacterota	Fibrobacteria	Fibrobacterales	Fibrobacteraceae	Fibrobacter	Fibrobacter sp900143055
RGVC443	RGIG6158	Illumina Sequencing	tRNA	Bacteria	Bacteroidota	Bacteroidia	Bacteroidales	Bacteroidaceae	Phocaeicola	Phocaeicola sp017416735
RGVC443	RGIG8757	Illumina Sequencing	tRNA	Bacteria	Bacteroidota	Bacteroidia	Bacteroidales	Bacteroidaceae	Phocaeicola
RGVC443	RGIG893	Illumina Sequencing	tRNA	Bacteria	Bacteroidota	Bacteroidia	Bacteroidales	Muribaculaceae	RGIG4576	RGIG4576 sp017391675
RGVC443	RGIG8941	Illumina Sequencing	tRNA	Bacteria	Firmicutes_A	Clostridia	Lachnospirales	Lachnospiraceae	Faecalimonas
RGVC443	RGIG966	Illumina Sequencing	tRNA	Bacteria	Bacteroidota	Bacteroidia	Bacteroidales	Muribaculaceae	CAG-485	CAG-485 sp017547845
RGVC443	RGIG9835	Illumina Sequencing	tRNA	Bacteria	Bacteroidota	Bacteroidia	Bacteroidales	Paludibacteraceae	RGIG9608	RGIG9608 sp017648235
RGVC443	RUG14614	Rumen Superset	tRNA	Bacteria	Bacteroidota	Bacteroidia	Bacteroidales	Bacteroidaceae	UBA1179	UBA1179 sp902774335
RGVC443	UBA4359	Rumen Superset	tRNA	Bacteria	Bacteroidota	Bacteroidia	Bacteroidales	Bacteroidaceae	UBA4334	UBA4334 sp002393555
RGVC444	RGIG4283	Illumina Sequencing	tRNA	Bacteria	Firmicutes_A	Clostridia	Oscillospirales	Ruminococcaceae	RGIG8773
RGVC445	RGIG4077	Illumina Sequencing	tRNA	Bacteria	Firmicutes_A	Clostridia	Oscillospirales	Ruminococcaceae	Ruminococcus	Ruminococcus sp017513795
RGVC446	HUN_Ruminococcus_albus_strain_KH2T6	Rumen Superset	tRNA	Bacteria	Firmicutes_A	Clostridia	Oscillospirales	Ruminococcaceae	Ruminococcus_D	Ruminococcus_D albus_B
RGVC446	RGIG8924	Illumina Sequencing	tRNA	Bacteria	Firmicutes_A	Clostridia	Oscillospirales	Acutalibacteraceae	UBA1417
RGVC447	RGIG727	Illumina Sequencing	tRNA	Bacteria	Firmicutes_A	Clostridia	Oscillospirales	Oscillospiraceae	CAG-83
RGVC447	RGIG9475	Illumina Sequencing	tRNA	Bacteria	Firmicutes_A	Clostridia	Oscillospirales	Oscillospiraceae	Faecousia	Faecousia sp017630495
RGVC447	RUG10824	Rumen Superset	tRNA	Bacteria	Firmicutes_A	Clostridia	Oscillospirales	Oscillospiraceae	Evtepia	Evtepia sp902781745
RGVC447	RUG14158	Rumen Superset	tRNA	Bacteria	Firmicutes_A	Clostridia	Oscillospirales	Oscillospiraceae	CAG-170	CAG-170 sp902796245
RGVC450	RGIG4291	Illumina Sequencing	tRNA	Bacteria	Firmicutes_A	Clostridia	Oscillospirales	QAKW01	QAKW01	QAKW01 sp017464525
RGVC453	RGIG9029	Illumina Sequencing	tRNA	Bacteria	Firmicutes_A	Clostridia	Oscillospirales	Oscillospiraceae	CAG-83	CAG-83 sp004555205
RGVC453	RUG14654	Rumen Superset	tRNA	Bacteria	Firmicutes_A	Clostridia	Oscillospirales	Oscillospiraceae	Limivicinus	Limivicinus sp902801295
RGVC453	RUG14822	Rumen Superset	tRNA	Bacteria	Firmicutes_A	Clostridia	Oscillospirales	Acutalibacteraceae	UBA1213	UBA1213 sp902802985
RGVC456	RGIG3748	Illumina Sequencing	tRNA	Bacteria	Firmicutes_A	Clostridia	Oscillospirales	CAG-382	SIG685	SIG685 sp017453605
RGVC457	RGIG8799	Illumina Sequencing	tRNA	Bacteria	Firmicutes_A	Clostridia	Oscillospirales	Butyricicoccaceae	UBA4644	UBA4644 sp017620505
RGVC460	RGIG6281	Illumina Sequencing	tRNA	Bacteria	Firmicutes_A	Clostridia	Lachnospirales	Lachnospiraceae	Acetatifactor	Acetatifactor sp017521605
RGVC460	RGIG6397	Illumina Sequencing	tRNA	Bacteria	Firmicutes_A	Clostridia	Lachnospirales	Lachnospiraceae	SFDP01	SFDP01 sp017521195
RGVC460	RGIG9047	Illumina Sequencing	tRNA	Bacteria	Firmicutes_A	Clostridia	Lachnospirales	Lachnospiraceae	UBA3282	UBA3282 sp017936885
RGVC460	RGIG9071	Illumina Sequencing	tRNA	Bacteria	Firmicutes_A	Clostridia	Lachnospirales	Lachnospiraceae	UBA2882
RGVC460	RGIG9271	Illumina Sequencing	tRNA	Bacteria	Firmicutes_A	Clostridia	Lachnospirales	Lachnospiraceae	Eubacterium_Q	Eubacterium_Q sp017634475
RGVC460	RUG13149	Rumen Superset	tRNA	Bacteria	Firmicutes_A	Clostridia	Lachnospirales	Lachnospiraceae	Agathobacter	Agathobacter sp900316805
RGVC460	RUG13558	Rumen Superset	tRNA	Bacteria	Firmicutes_A	Clostridia	Lachnospirales	Lachnospiraceae	ISDg	ISDg sp902787715
RGVC460	RUG14022	Rumen Superset	tRNA	Bacteria	Firmicutes_A	Clostridia	Lachnospirales	Lachnospiraceae	CAG-791	CAG-791 sp900317475
RGVC460	RUG14784	Rumen Superset	tRNA	Bacteria	Firmicutes_A	Clostridia	Lachnospirales	Lachnospiraceae	CAG-791	CAG-791 sp900101015
RGVC460	RUG14832	Rumen Superset	tRNA	Bacteria	Firmicutes_A	Clostridia	Lachnospirales	Lachnospiraceae	Porcincola	Porcincola sp902803065
RGVC460	RUG14938	Rumen Superset	tRNA	Bacteria	Firmicutes_A	Clostridia	Lachnospirales	Lachnospiraceae	RUG147	RUG147 sp900315495
RGVC460	SOL_BUTY22	Rumen Superset	tRNA	Bacteria	Firmicutes_A	Clostridia	Lachnospirales	Lachnospiraceae	RGIG3040
RGVC460	SOL_FIRM17	Rumen Superset	tRNA	Bacteria	Firmicutes_A	Clostridia	Lachnospirales	Lachnospiraceae	CAG-303	CAG-303 sp905236025
RGVC461	RGIG4529	Illumina Sequencing	tRNA	Bacteria	Firmicutes_A	Clostridia	Oscillospirales	CAG-272	SIG701	SIG701 sp017468385
RGVC463	RGIG5542	Illumina Sequencing	tRNA	Bacteria	Verrucomicrobiota	Lentisphaeria	Victivallales	Victivallaceae	UBA1784	UBA1784 sp017508015
RGVC464	RGIG7340	Illumina Sequencing	tRNA	Bacteria	Bacteroidota	Bacteroidia	Bacteroidales	Rikenellaceae	Alistipes
RGVC464	RGIG889	Illumina Sequencing	tRNA	Bacteria	Bacteroidota	Bacteroidia	Bacteroidales	Rikenellaceae	Alistipes	Alistipes sp900770585
RGVC464	RGIG8936	Illumina Sequencing	tRNA	Bacteria	Bacteroidota	Bacteroidia	Bacteroidales	Rikenellaceae	Alistipes	Alistipes sp017442365
RGVC464	RGIG9040	Illumina Sequencing	tRNA	Bacteria	Bacteroidota	Bacteroidia	Bacteroidales	Rikenellaceae	Alistipes	Alistipes sp017937125
RGVC464	RGIG9529	Illumina Sequencing	tRNA	Bacteria	Bacteroidota	Bacteroidia	Bacteroidales	Rikenellaceae	UBA940
RGVC464	RGIG9537	Illumina Sequencing	tRNA	Bacteria	Bacteroidota	Bacteroidia	Bacteroidales	Bacteroidaceae	UBA4372	UBA4372 sp017379075
RGVC464	RGIG957	Illumina Sequencing	tRNA	Bacteria	Bacteroidota	Bacteroidia	Bacteroidales	Rikenellaceae	Alistipes	Alistipes sp017424405
RGVC464	RUG13082	Rumen Superset	tRNA	Bacteria	Bacteroidota	Bacteroidia	Bacteroidales	UBA932	Cryptobacteroides	Cryptobacteroides sp902801885
RGVC468	RGIG4566	Illumina Sequencing	tRNA	Bacteria	Firmicutes_A	Clostridia	Christensenellales	UBA1242	HGM11367	HGM11367 sp017467895
RGVC469	RUG14042	Rumen Superset	tRNA	Bacteria	Firmicutes_A	Clostridia	Oscillospirales	Oscillospiraceae	Limivicinus
RGVC470	RGIG2129	Illumina Sequencing	tRNA	Bacteria	Firmicutes_A	Clostridia	Oscillospirales	Oscillospiraceae	Faecousia	Faecousia sp017409205
RGVC470	RGIG407	Illumina Sequencing	tRNA	Bacteria	Firmicutes_A	Clostridia	Oscillospirales	Oscillospiraceae	Faecousia
RGVC470	RGIG7290	Illumina Sequencing	tRNA	Bacteria	Firmicutes_A	Clostridia	Oscillospirales	Ruminococcaceae	UMGS1668	UMGS1668 sp017547705
RGVC470	RGIG7395	Illumina Sequencing	tRNA	Bacteria	Firmicutes_A	Clostridia	Oscillospirales	Oscillospiraceae	RGIG7114
RGVC470	RGIG7498	Illumina Sequencing	tRNA	Bacteria	Firmicutes_A	Clostridia	Oscillospirales	Oscillospiraceae	Faecousia
RGVC470	RGIG7666	Illumina Sequencing	tRNA	Bacteria	Firmicutes_A	Clostridia	Oscillospirales	Oscillospiraceae	Faecousia	Faecousia sp017561205
RGVC470	RGIG8578	Illumina Sequencing	tRNA	Bacteria	Firmicutes_A	Clostridia	Oscillospirales	Oscillospiraceae	Faecousia	Faecousia sp017624715
RGVC470	RGIG8706	Illumina Sequencing	tRNA	Archaea	Halobacteriota	Methanomicrobia	Methanomicrobiales	Methanocorpusculaceae	Methanocorpusculum	Methanocorpusculum sp017622255
RGVC470	RGIG8933	Illumina Sequencing	tRNA	Bacteria	Firmicutes_A	Clostridia	Oscillospirales	Oscillospiraceae	Faecousia
RGVC470	RGIG9881	Illumina Sequencing	tRNA	Bacteria	Firmicutes_A	Clostridia	Oscillospirales	Oscillospiraceae	Faecousia
RGVC472	RGIG1790	Illumina Sequencing	tRNA	Bacteria	Firmicutes_A	Clostridia	Christensenellales	Borkfalkiaceae	UBA1259
RGVC472	RGIG1930	Illumina Sequencing	tRNA	Bacteria	Firmicutes_A	Clostridia	Christensenellales	Borkfalkiaceae	UBA1259	UBA1259 sp017414525
RGVC472	RGIG3255	Illumina Sequencing	tRNA	Bacteria	Firmicutes_A	Clostridia	Christensenellales	Borkfalkiaceae	UBA1259	UBA1259 sp017448355
RGVC472	RGIG5378	Illumina Sequencing	tRNA	Bacteria	Firmicutes_A	Clostridia	Christensenellales	Borkfalkiaceae	UBA1259	UBA1259 sp017503265
RGVC472	RGIG8226	Illumina Sequencing	tRNA	Bacteria	Firmicutes_A	Clostridia	Christensenellales	Borkfalkiaceae	UBA1259	UBA1259 sp017615975
RGVC472	RGIG8722	Illumina Sequencing	tRNA	Bacteria	Firmicutes_A	Clostridia	Christensenellales	Borkfalkiaceae	UBA1259	UBA1259 sp017621955
RGVC472	RUG14822	Rumen Superset	tRNA	Bacteria	Firmicutes_A	Clostridia	Oscillospirales	Acutalibacteraceae	UBA1213	UBA1213 sp902802985
RGVC474	RGIG4139	Illumina Sequencing	tRNA	Bacteria	Firmicutes_A	Clostridia	Oscillospirales	Oscillospiraceae	Faecousia	Faecousia sp017466665
RGVC477	RGIG3830	Illumina Sequencing	tRNA	Bacteria	Firmicutes_A	Clostridia	Oscillospirales	Oscillospiraceae	Faecousia	Faecousia sp017457285
RGVC477	RGIG3889	Illumina Sequencing	tRNA	Bacteria	Firmicutes_A	Clostridia	Oscillospirales	Oscillospiraceae	Faecousia	Faecousia sp017456105
RGVC477	RGIG6259	Illumina Sequencing	tRNA	Bacteria	Firmicutes_A	Clostridia	Oscillospirales	Oscillospiraceae	Faecousia	Faecousia sp017521875
RGVC477	RGIG7498	Illumina Sequencing	tRNA	Bacteria	Firmicutes_A	Clostridia	Oscillospirales	Oscillospiraceae	Faecousia
RGVC477	RGIG8706	Illumina Sequencing	tRNA	Archaea	Halobacteriota	Methanomicrobia	Methanomicrobiales	Methanocorpusculaceae	Methanocorpusculum	Methanocorpusculum sp017622255
RGVC477	RGIG9045	Illumina Sequencing	tRNA	Bacteria	Firmicutes_A	Clostridia	Oscillospirales	Oscillospiraceae	Faecousia	Faecousia sp017936985
RGVC477	RUG13015	Rumen Superset	tRNA	Bacteria	Firmicutes_A	Clostridia	Oscillospirales	Oscillospiraceae	Faecousia	Faecousia sp900315595
RGVC477	RUG14042	Rumen Superset	tRNA	Bacteria	Firmicutes_A	Clostridia	Oscillospirales	Oscillospiraceae	Limivicinus
RGVC479	RGIG8686	Illumina Sequencing	tRNA	Bacteria	Firmicutes	Bacilli	RF39	UBA660	RUG13160
RGVC483	RUG14155	Rumen Superset	tRNA	Bacteria	Firmicutes_A	Clostridia	Oscillospirales	Ruminococcaceae	UBA3855	UBA3855 sp902796255
RGVC485	RGIG6273	Illumina Sequencing	tRNA	Bacteria	Verrucomicrobiota	Lentisphaeria	Victivallales	UBA1829	SIG77
RGVC485	RGIG6465	Illumina Sequencing	tRNA	Bacteria	Verrucomicrobiota	Lentisphaeria	Victivallales	UBA1829	SIG77
RGVC486	RGIG2065	Illumina Sequencing	tRNA	Bacteria	Firmicutes_A	Clostridia	Christensenellales	CAG-74	UBA11524	UBA11524 sp017410455
RGVC486	RGIG3087	Illumina Sequencing	tRNA	Bacteria	Firmicutes_A	Clostridia	Christensenellales	CAG-74	UBA11524
RGVC486	RUG13574	Rumen Superset	tRNA	Bacteria	Firmicutes_A	Clostridia	Christensenellales	CAG-74	UBA2862	UBA2862 sp902790525
RGVC487	RUG13271	Rumen Superset	tRNA	Bacteria	Firmicutes_A	Clostridia	Christensenellales	CAG-138	UBA3857	UBA3857 sp900313585
RGVC487	RUG14651	Rumen Superset	tRNA	Bacteria	Firmicutes_A	Clostridia	Christensenellales	CAG-138	RUG472	RUG472 sp902798825
RGVC487	RUG14713	Rumen Superset	tRNA	Bacteria	Firmicutes_A	Clostridia	Christensenellales	CAG-138	RUG472	RUG472 sp902801845
RGVC489	RUG10537	Rumen Superset	tRNA	Bacteria	Firmicutes	Bacilli	RF39	UBA660	CAG-1000	CAG-1000 sp900313815
RGVC491	RGIG5486	Illumina Sequencing	tRNA	Bacteria	Firmicutes_A	Clostridia	UBA1212	RGIG7378	RGIG7378	RGIG7378 sp017501105
RGVC492	RUG13378	Rumen Superset	tRNA	Bacteria	Firmicutes_A	Clostridia	Lachnospirales	Lachnospiraceae	Acetatifactor	Acetatifactor sp900320485
RGVC492	RUG14549	Rumen Superset	tRNA	Bacteria	Firmicutes_A	Clostridia	Lachnospirales	Lachnospiraceae	CAG-127	CAG-127 sp902800325
RGVC493	RGIG1694	Illumina Sequencing	tRNA	Bacteria	Firmicutes_A	Clostridia	Lachnospirales	Lachnospiraceae	RUG11237	RUG11237 sp017399445
RGVC493	RUG14158	Rumen Superset	tRNA	Bacteria	Firmicutes_A	Clostridia	Oscillospirales	Oscillospiraceae	CAG-170	CAG-170 sp902796245
RGVC495	RGIG4341	Illumina Sequencing	tRNA	Bacteria	Firmicutes	Bacilli	RF39	UBA660	Coprosoma	Coprosoma sp017460245
RGVC495	RUG10929	Rumen Superset	tRNA	Bacteria	Firmicutes	Bacilli	RF39	UBA660	CAG-1000	CAG-1000 sp902764145
RGVC495	RUG11198	Rumen Superset	tRNA	Bacteria	Firmicutes	Bacilli	RF39	UBA660	RUG11198	RUG11198 sp902766815
RGVC497	RGIG2126	Illumina Sequencing	tRNA	Bacteria	Bacteroidota	Bacteroidia	Bacteroidales	Bacteroidaceae	Phocaeicola
RGVC497	RGIG8623	Illumina Sequencing	tRNA	Bacteria	Bacteroidota	Bacteroidia	Bacteroidales	Bacteroidaceae	Phocaeicola	Phocaeicola sp017467385
RGVC497	RGIG9847	Illumina Sequencing	tRNA	Bacteria	Bacteroidota	Bacteroidia	Bacteroidales	Bacteroidaceae	HGM04593	HGM04593 sp017647975
RGVC499	RGIG1406	Illumina Sequencing	tRNA	Bacteria	Firmicutes_A	Clostridia	UBA1212	UBA1257	UBA1257	UBA1257 sp002308775
RGVC499	RGIG3872	Illumina Sequencing	tRNA	Bacteria	Firmicutes_A	Clostridia	Christensenellales	UBA1242	RGIG3872	RGIG3872 sp017456465
RGVC499	RGIG4556	Illumina Sequencing	tRNA	Bacteria	Firmicutes_A	Clostridia	Christensenellales	Borkfalkiaceae	Scatosoma	Scatosoma sp017468085
RGVC499	RGIG8733	Illumina Sequencing	tRNA	Bacteria	Firmicutes_A	Clostridia	Christensenellales	Borkfalkiaceae	Gallimonas	Gallimonas sp017621735
RGVC499	RUG14241	Rumen Superset	tRNA	Bacteria	Firmicutes_A	Clostridia	Christensenellales	Borkfalkiaceae	UBA7597	UBA7597 sp900542935
RGVC501	RGIG354	Illumina Sequencing	tRNA	Bacteria	Firmicutes_A	Clostridia	Oscillospirales	Oscillospiraceae	Dysosmobacter	Dysosmobacter sp017380995
RGVC501	RGIG3830	Illumina Sequencing	tRNA	Bacteria	Firmicutes_A	Clostridia	Oscillospirales	Oscillospiraceae	Faecousia	Faecousia sp017457285
RGVC501	RGIG4651	Illumina Sequencing	tRNA	Bacteria	Firmicutes_A	Clostridia	Oscillospirales	Oscillospiraceae	Faecousia	Faecousia sp017482385
RGVC501	RGIG4961	Illumina Sequencing	tRNA	Bacteria	Firmicutes_A	Clostridia	Oscillospirales	Oscillospiraceae	Dysosmobacter	Dysosmobacter sp017469475
RGVC501	RGIG727	Illumina Sequencing	tRNA	Bacteria	Firmicutes_A	Clostridia	Oscillospirales	Oscillospiraceae	CAG-83
RGVC511	RGIG1669	Illumina Sequencing	tRNA	Bacteria	Firmicutes_A	Clostridia	Oscillospirales	Oscillospiraceae	Lawsonibacter	Lawsonibacter sp017416685
RGVC511	RGIG1694	Illumina Sequencing	tRNA	Bacteria	Firmicutes_A	Clostridia	Lachnospirales	Lachnospiraceae	RUG11237	RUG11237 sp017399445
RGVC511	RGIG2142	Illumina Sequencing	tRNA	Bacteria	Firmicutes_A	Clostridia	Oscillospirales	Oscillospiraceae	CAG-83	CAG-83 sp017408915
RGVC511	RGIG6644	Illumina Sequencing	tRNA	Bacteria	Firmicutes_A	Clostridia	Oscillospirales	Oscillospiraceae	Dysosmobacter	Dysosmobacter sp017527365
RGVC511	RGIG9086	Illumina Sequencing	tRNA	Bacteria	Firmicutes_A	Clostridia	Oscillospirales	Oscillospiraceae	Faecousia	Faecousia sp017936205
RGVC511	RGIG9475	Illumina Sequencing	tRNA	Bacteria	Firmicutes_A	Clostridia	Oscillospirales	Oscillospiraceae	Faecousia	Faecousia sp017630495
RGVC511	RGIG9881	Illumina Sequencing	tRNA	Bacteria	Firmicutes_A	Clostridia	Oscillospirales	Oscillospiraceae	Faecousia
RGVC511	RUG10824	Rumen Superset	tRNA	Bacteria	Firmicutes_A	Clostridia	Oscillospirales	Oscillospiraceae	Evtepia	Evtepia sp902781745
RGVC511	RUG12329	Rumen Superset	tRNA	Bacteria	Firmicutes_A	Clostridia	Oscillospirales	Oscillospiraceae	Faecousia	Faecousia sp900316335
RGVC511	RUG14158	Rumen Superset	tRNA	Bacteria	Firmicutes_A	Clostridia	Oscillospirales	Oscillospiraceae	CAG-170	CAG-170 sp902796245
RGVC511	RUG14543	Rumen Superset	tRNA	Bacteria	Firmicutes_A	Clostridia	Oscillospirales	Oscillospiraceae	Limivicinus	Limivicinus sp900319635
RGVC513	RGIG3027	Illumina Sequencing	tRNA	Bacteria	Firmicutes_A	Clostridia	Christensenellales	CAG-74	Ventricola	Ventricola sp017436605
RGVC513	RGIG4629	Illumina Sequencing	tRNA	Bacteria	Firmicutes_A	Clostridia	Christensenellales	CAG-74	Ventricola
RGVC513	RGIG7282	Illumina Sequencing	tRNA	Bacteria	Firmicutes_A	Clostridia	Christensenellales	CAG-74	Ventricola	Ventricola sp017547805
RGVC513	RGIG8950	Illumina Sequencing	tRNA	Bacteria	Firmicutes_A	Clostridia	Christensenellales	CAG-74	Ventricola	Ventricola sp017938795
RGVC513	RGIG8959	Illumina Sequencing	tRNA	Bacteria	Firmicutes_A	Clostridia	Christensenellales	CAG-74	Limiplasma	Limiplasma sp017938645
RGVC513	RGIG9018	Illumina Sequencing	tRNA	Bacteria	Firmicutes_A	Clostridia	Christensenellales	CAG-74	Ventricola	Ventricola sp017937505
RGVC513	RUG14340	Rumen Superset	tRNA	Bacteria	Firmicutes_A	Clostridia	Christensenellales	CAG-74	UBA2862	UBA2862 sp902798105
RGVC513	RUG14416	Rumen Superset	tRNA	Bacteria	Firmicutes_A	Clostridia	Christensenellales	CAG-138	RUG472	RUG472 sp902798825
RGVC514	RGIG8567	Illumina Sequencing	tRNA	Bacteria	Firmicutes_A	Clostridia	Oscillospirales	Oscillospiraceae	Lawsonibacter	Lawsonibacter sp017624915
RGVC514	RGIG9475	Illumina Sequencing	tRNA	Bacteria	Firmicutes_A	Clostridia	Oscillospirales	Oscillospiraceae	Faecousia	Faecousia sp017630495
RGVC514	RUG10824	Rumen Superset	tRNA	Bacteria	Firmicutes_A	Clostridia	Oscillospirales	Oscillospiraceae	Evtepia	Evtepia sp902781745
RGVC514	RUG14158	Rumen Superset	tRNA	Bacteria	Firmicutes_A	Clostridia	Oscillospirales	Oscillospiraceae	CAG-170	CAG-170 sp902796245
RGVC516	RGIG1750	Illumina Sequencing	tRNA	Bacteria	Firmicutes_A	Clostridia	Oscillospirales	Ruminococcaceae	UMGS1668	UMGS1668 sp015067125
RGVC516	RGIG2946	Illumina Sequencing	tRNA	Bacteria	Firmicutes_A	Clostridia	Oscillospirales	Ruminococcaceae	UMGS1668	UMGS1668 sp015067125
RGVC516	RGIG3049	Illumina Sequencing	tRNA	Bacteria	Firmicutes_A	Clostridia	Oscillospirales	Ruminococcaceae	UMGS1668	UMGS1668 sp017436125
RGVC516	RGIG5193	Illumina Sequencing	tRNA	Bacteria	Firmicutes_A	Clostridia	Oscillospirales	Ruminococcaceae	UMGS1668	UMGS1668 sp017536625
RGVC516	RGIG6366	Illumina Sequencing	tRNA	Bacteria	Firmicutes_A	Clostridia	Oscillospirales	Ruminococcaceae	UMGS1668	UMGS1668 sp017521825
RGVC516	RGIG6405	Illumina Sequencing	tRNA	Bacteria	Firmicutes_A	Clostridia	Oscillospirales	Ruminococcaceae	UMGS1668	UMGS1668 sp017536625
RGVC516	RGIG7416	Illumina Sequencing	tRNA	Bacteria	Firmicutes_A	Clostridia	Oscillospirales	Oscillospiraceae	CAG-83
RGVC516	RGIG8535	Illumina Sequencing	tRNA	Bacteria	Firmicutes_A	Clostridia	Oscillospirales	Ruminococcaceae	UMGS1668	UMGS1668 sp017847875
RGVC518	RGIG4210	Illumina Sequencing	tRNA	Bacteria	Firmicutes_A	Clostridia	Christensenellales	UBA1242	Caccovivens
RGVC518	RGIG9905	Illumina Sequencing	tRNA	Archaea	Methanobacteriota	Methanobacteria	Methanobacteriales	Methanobacteriaceae	Methanobrevibacter	Methanobrevibacter sp017646885
RGVC521	RGIG1911	Illumina Sequencing	tRNA	Bacteria	Firmicutes_A	Clostridia	Oscillospirales	QAMX01	RGIG1911	RGIG1911 sp017414715
RGVC521	RGIG3013	Illumina Sequencing	tRNA	Bacteria	Firmicutes_A	Clostridia	Oscillospirales	Acutalibacteraceae	RGIG3013	RGIG3013 sp017436815
RGVC521	RGIG6313	Illumina Sequencing	tRNA	Bacteria	Firmicutes_A	Clostridia	Oscillospirales	Acutalibacteraceae	UBA737
RGVC521	RGIG6467	Illumina Sequencing	tRNA	Bacteria	Firmicutes_A	Clostridia	Peptostreptococcales	Anaerovoracaceae	CAG-238	CAG-238 sp017436705
RGVC521	RGIG7429	Illumina Sequencing	tRNA	Bacteria	Firmicutes_A	Clostridia	Oscillospirales	Acutalibacteraceae	UBA737	UBA737 sp017549565
RGVC521	RGIG8739	Illumina Sequencing	tRNA	Bacteria	Firmicutes_A	Clostridia	Oscillospirales	CAG-272	CAG-272	CAG-272 sp017621655
RGVC521	RGIG975	Illumina Sequencing	tRNA	Bacteria	Firmicutes_A	Clostridia	Oscillospirales	Acutalibacteraceae	UBA737	UBA737 sp017390725
RGVC521	RUG14662	Rumen Superset	tRNA	Bacteria	Firmicutes_A	Clostridia	Oscillospirales	Acutalibacteraceae	RUG592	RUG592 sp902801245
RGVC521	RUG14926	Rumen Superset	tRNA	Bacteria	Firmicutes_A	Clostridia	Oscillospirales	Ruminococcaceae	Ruminococcus	Ruminococcus flavefaciens_R
RGVC524	RGIG2174	Illumina Sequencing	tRNA	Bacteria	Firmicutes_A	Clostridia	Oscillospirales	CAG-272	RGIG2000	RGIG2000 sp017481595
RGVC524	RGIG3816	Illumina Sequencing	tRNA	Bacteria	Firmicutes_A	Clostridia	Oscillospirales	CAG-272	RGIG2000	RGIG2000 sp017457545
RGVC524	RGIG3999	Illumina Sequencing	tRNA	Bacteria	Firmicutes_A	Clostridia	Oscillospirales	CAG-272	RGIG2000	RGIG2000 sp017451485
RGVC524	RGIG4052	Illumina Sequencing	tRNA	Bacteria	Firmicutes_A	Clostridia	Oscillospirales	CAG-272	SIG673
RGVC524	RGIG4089	Illumina Sequencing	tRNA	Bacteria	Firmicutes_A	Clostridia	Oscillospirales	CAG-272	RGIG2000	RGIG2000 sp017457545
RGVC524	RGIG4252	Illumina Sequencing	tRNA	Bacteria	Firmicutes_A	Clostridia	Oscillospirales	CAG-272	RGIG2000	RGIG2000 sp017461385
RGVC524	RGIG5491	Illumina Sequencing	tRNA	Bacteria	Firmicutes_A	Clostridia	Oscillospirales	CAG-272	UBA1740	UBA1740 sp017501005
RGVC524	RGIG8561	Illumina Sequencing	tRNA	Bacteria	Firmicutes_A	Clostridia	Oscillospirales	CAG-272	RGIG2000	RGIG2000 sp017625915
RGVC524	RGIG9432	Illumina Sequencing	tRNA	Bacteria	Firmicutes_A	Clostridia	Oscillospirales	CAG-272	UBA1740	UBA1740 sp017631325
RGVC524	RGIG955	Illumina Sequencing	tRNA	Bacteria	Firmicutes_A	Clostridia	Oscillospirales	CAG-272	SIG710
RGVC526	RGIG8522	Illumina Sequencing	tRNA	Bacteria	Firmicutes	Bacilli	RF39	UBA660	RGIG4266	RGIG4266 sp017461465
RGVC526	RUG13868	Rumen Superset	tRNA	Bacteria	Firmicutes	Bacilli	RF39	UBA660	RUG13868	RUG13868 sp902793375
RGVC526	RUG14702	Rumen Superset	tRNA	Bacteria	Firmicutes	Bacilli	RF39	UBA660	RUG12438	RUG12438 sp902801685
RGVC527	RGIG4670	Illumina Sequencing	tRNA	Bacteria	Firmicutes_A	Clostridia	Oscillospirales	Oscillospiraceae	Faecousia
RGVC527	RGIG5310	Illumina Sequencing	tRNA	Bacteria	Firmicutes_A	Clostridia	Oscillospirales	CAG-272	CAG-448	CAG-448 sp017504625
RGVC527	RGIG6289	Illumina Sequencing	tRNA	Bacteria	Firmicutes_A	Clostridia	Oscillospirales	Oscillospiraceae	Faecousia	Faecousia sp017521485
RGVC530	RGIG3905	Illumina Sequencing	tRNA	Bacteria	Spirochaetota	Spirochaetia	Treponematales	Treponemataceae	Treponema_F	Treponema_F sp017622135
RGVC530	RGIG3993	Illumina Sequencing	tRNA	Bacteria	Spirochaetota	Spirochaetia	Treponematales	Treponemataceae	Treponema_F	Treponema_F sp017622135
RGVC530	RGIG4689	Illumina Sequencing	tRNA	Bacteria	Spirochaetota	Spirochaetia	Treponematales	Treponemataceae	Treponema_F	Treponema_F sp017622135
RGVC530	RGIG5328	Illumina Sequencing	tRNA	Bacteria	Spirochaetota	Spirochaetia	Treponematales	Treponemataceae	Treponema_F	Treponema_F sp017622135
RGVC530	RGIG7474	Illumina Sequencing	tRNA	Bacteria	Spirochaetota	Spirochaetia	Treponematales	Treponemataceae	Treponema_F	Treponema_F sp017549025
RGVC530	RGIG7752	Illumina Sequencing	tRNA	Bacteria	Spirochaetota	Spirochaetia	Treponematales	Treponemataceae	Treponema_F
RGVC530	RGIG8125	Illumina Sequencing	tRNA	Bacteria	Spirochaetota	Spirochaetia	Treponematales	Treponemataceae	RGIG1711	RGIG1711 sp017618015
RGVC530	RGIG8712	Illumina Sequencing	tRNA	Bacteria	Spirochaetota	Spirochaetia	Treponematales	Treponemataceae	Treponema_F	Treponema_F sp017622135
RGVC530	RGIG9078	Illumina Sequencing	tRNA	Bacteria	Spirochaetota	Spirochaetia	Treponematales	Treponemataceae	Treponema_F	Treponema_F sp017936345
RGVC530	RGIG9546	Illumina Sequencing	tRNA	Bacteria	Spirochaetota	Spirochaetia	Treponematales	Treponemataceae	Treponema_F	Treponema_F sp017629095
RGVC532	RGIG7498	Illumina Sequencing	tRNA	Bacteria	Firmicutes_A	Clostridia	Oscillospirales	Oscillospiraceae	Faecousia
RGVC532	RGIG8706	Illumina Sequencing	tRNA	Archaea	Halobacteriota	Methanomicrobia	Methanomicrobiales	Methanocorpusculaceae	Methanocorpusculum	Methanocorpusculum sp017622255
RGVC533	RGIG4749	Illumina Sequencing	tRNA	Bacteria	Firmicutes	Bacilli	RF39	UBA660	RUG591	RUG591 sp017472015
RGVC533	RGIG6611	Illumina Sequencing	tRNA	Bacteria	Firmicutes	Bacilli	RF39	UBA660	RUG591	RUG591 sp017528315
RGVC533	RGIG8845	Illumina Sequencing	tRNA	Bacteria	Firmicutes	Bacilli	RF39	UBA660	CAG-417	CAG-417 sp017941235
RGVC533	RUG11118	Rumen Superset	tRNA	Bacteria	Firmicutes	Bacilli	RF39	UBA660	CAG-533	CAG-533 sp000434495
RGVC535	RGIG1694	Illumina Sequencing	tRNA	Bacteria	Firmicutes_A	Clostridia	Lachnospirales	Lachnospiraceae	RUG11237	RUG11237 sp017399445
RGVC535	RGIG2119	Illumina Sequencing	tRNA	Bacteria	Firmicutes_A	Clostridia	Christensenellales	CAG-74	Ventricola	Ventricola sp017436605
RGVC535	RGIG6282	Illumina Sequencing	tRNA	Bacteria	Firmicutes_A	Clostridia	Christensenellales	CAG-74	Ventricola	Ventricola sp017521565
RGVC535	RGIG7282	Illumina Sequencing	tRNA	Bacteria	Firmicutes_A	Clostridia	Christensenellales	CAG-74	Ventricola	Ventricola sp017547805
RGVC535	RGIG7438	Illumina Sequencing	tRNA	Bacteria	Firmicutes_A	Clostridia	Christensenellales	CAG-74	Ventricola
RGVC535	RGIG8456	Illumina Sequencing	tRNA	Bacteria	Firmicutes_A	Clostridia	Christensenellales	CAG-74	Ventricola	Ventricola sp002395225
RGVC535	RGIG8950	Illumina Sequencing	tRNA	Bacteria	Firmicutes_A	Clostridia	Christensenellales	CAG-74	Ventricola	Ventricola sp017938795
RGVC535	RGIG8959	Illumina Sequencing	tRNA	Bacteria	Firmicutes_A	Clostridia	Christensenellales	CAG-74	Limiplasma	Limiplasma sp017938645
RGVC535	RGIG9018	Illumina Sequencing	tRNA	Bacteria	Firmicutes_A	Clostridia	Christensenellales	CAG-74	Ventricola	Ventricola sp017937505
RGVC535	RGIG9076	Illumina Sequencing	tRNA	Bacteria	Firmicutes_A	Clostridia	Christensenellales	CAG-74	Ventricola	Ventricola sp017936375
RGVC535	RUG14874	Rumen Superset	tRNA	Bacteria	Firmicutes_A	Clostridia	Oscillospirales	Acutalibacteraceae	UBA1213	UBA1213 sp900319255
RGVC539	RGIG2973	Illumina Sequencing	tRNA	Bacteria	Firmicutes_A	Clostridia	UMGS1883	UMGS1540	SIG447	SIG447 sp017442155
RGVC539	RGIG3022	Illumina Sequencing	tRNA	Bacteria	Firmicutes_A	Clostridia	UMGS1883	UMGS1540	SIG447	SIG447 sp017436645
RGVC544	RGIG2225	Illumina Sequencing	tRNA	Bacteria	Bacteroidota	Bacteroidia	Bacteroidales	Rikenellaceae	Alistipes	Alistipes sp017623115
RGVC544	RGIG3003	Illumina Sequencing	tRNA	Bacteria	Bacteroidota	Bacteroidia	Bacteroidales	Rikenellaceae	Alistipes	Alistipes sp017437045
RGVC544	RGIG9853	Illumina Sequencing	tRNA	Bacteria	Bacteroidota	Bacteroidia	Bacteroidales	Rikenellaceae	Alistipes	Alistipes sp900769525
RGVC550	RGIG296	Illumina Sequencing	tRNA	Bacteria	Bacteroidota	Bacteroidia	Bacteroidales	Rikenellaceae	Alistipes
RGVC550	RGIG5252	Illumina Sequencing	tRNA	Bacteria	Bacteroidota	Bacteroidia	Bacteroidales	Rikenellaceae	Alistipes
RGVC550	RGIG6368	Illumina Sequencing	tRNA	Bacteria	Bacteroidota	Bacteroidia	Bacteroidales	Rikenellaceae	Alistipes	Alistipes sp017520545
RGVC550	RGIG7425	Illumina Sequencing	tRNA	Bacteria	Bacteroidota	Bacteroidia	Bacteroidales	Rikenellaceae	Alistipes
RGVC550	RGIG940	Illumina Sequencing	tRNA	Bacteria	Bacteroidota	Bacteroidia	Bacteroidales	Rikenellaceae	Alistipes
RGVC550	RGIG946	Illumina Sequencing	tRNA	Bacteria	Bacteroidota	Bacteroidia	Bacteroidales	Rikenellaceae	Alistipes
RGVC550	RGIG9488	Illumina Sequencing	tRNA	Bacteria	Bacteroidota	Bacteroidia	Bacteroidales	Rikenellaceae	Alistipes	Alistipes sp017630245
RGVC550	RGIG9870	Illumina Sequencing	tRNA	Bacteria	Bacteroidota	Bacteroidia	Bacteroidales	Rikenellaceae	Alistipes	Alistipes sp017629035
RGVC550	RUG12667	Rumen Superset	tRNA	Bacteria	Bacteroidota	Bacteroidia	Bacteroidales	Muribaculaceae	Sodaliphilus	Sodaliphilus pleomorphus
RGVC550	UBA3709	Rumen Superset	tRNA	Bacteria	Bacteroidota	Bacteroidia	Bacteroidales	UBA932	Egerieousia	Egerieousia sp002372015
RGVC550	UBA4866	Rumen Superset	tRNA	Bacteria	Bacteroidota	Bacteroidia	Bacteroidales	P3	UBA10566	UBA10566 sp002399565
RGVC551	RUG12215	Rumen Superset	tRNA	Bacteria	Firmicutes_A	Clostridia	Oscillospirales	Acutalibacteraceae	UBA1213	UBA1213 sp900322105
RGVC552	RGIG6256	Illumina Sequencing	tRNA	Bacteria	Firmicutes_A	Clostridia	Christensenellales	CAG-74	Limiplasma	Limiplasma sp017516765
RGVC552	RGIG7318	Illumina Sequencing	tRNA	Bacteria	Firmicutes_A	Clostridia	Christensenellales	CAG-74	Limiplasma	Limiplasma sp017547285
RGVC552	RUG11247	Rumen Superset	tRNA	Bacteria	Firmicutes_A	Clostridia	Christensenellales	CAG-74	RUG11247	RUG11247 sp902767315
RGVC552	RUG14874	Rumen Superset	tRNA	Bacteria	Firmicutes_A	Clostridia	Oscillospirales	Acutalibacteraceae	UBA1213	UBA1213 sp900319255
RGVC553	RUG13378	Rumen Superset	tRNA	Bacteria	Firmicutes_A	Clostridia	Lachnospirales	Lachnospiraceae	Acetatifactor	Acetatifactor sp900320485
RGVC553	RUG13616	Rumen Superset	tRNA	Bacteria	Firmicutes_A	Clostridia	Lachnospirales	Lachnospiraceae	Clostridium_R	Clostridium_R sp003445895
RGVC554	RUG13939	Rumen Superset	tRNA	Bacteria	Firmicutes_A	Clostridia	Christensenellales	CAG-74	RUG563	RUG563 sp900320085
RGVC557	RGIG1688	Illumina Sequencing	tRNA	Bacteria	Firmicutes	Bacilli	RF39	UBA660	CAG-877	CAG-877 sp017416535
RGVC557	RGIG2508	Illumina Sequencing	tRNA	Bacteria	Firmicutes	Bacilli	RF39	UBA660	UBA3789	UBA3789 sp017432645
RGVC557	RGIG5718	Illumina Sequencing	tRNA	Bacteria	Firmicutes	Bacilli	RF39	UBA660	UBA3789
RGVC557	RGIG8845	Illumina Sequencing	tRNA	Bacteria	Firmicutes	Bacilli	RF39	UBA660	CAG-417	CAG-417 sp017941235
RGVC557	RUG11321	Rumen Superset	tRNA	Bacteria	Firmicutes	Bacilli	RF39	UBA660	UBA3789	UBA3789 sp902768065
RGVC557	RUG11471	Rumen Superset	tRNA	Bacteria	Firmicutes	Bacilli	RF39	UBA660	UBA3789	UBA3789 sp900314225
RGVC557	RUG12586	Rumen Superset	tRNA	Bacteria	Firmicutes	Bacilli	RF39	UBA660	UBA3789	UBA3789 sp902780585
RGVC557	RUG13452	Rumen Superset	tRNA	Bacteria	Firmicutes	Bacilli	RF39	UBA660	UBA3789	UBA3789 sp900314225
RGVC557	RUG13689	Rumen Superset	tRNA	Bacteria	Firmicutes	Bacilli	RF39	UBA660	CAG-417	CAG-417 sp902791625
RGVC557	RUG13941	Rumen Superset	tRNA	Bacteria	Firmicutes	Bacilli	RF39	UBA660	UBA3789	UBA3789 sp902794075
RGVC557	RUG14409	Rumen Superset	tRNA	Bacteria	Firmicutes	Bacilli	RF39	UBA660	UBA3789	UBA3789 sp902793315
RGVC557	SVA_102_bin56	Rumen Superset	tRNA	Bacteria	Firmicutes	Bacilli	RF39	UBA660	Coprovivens
RGVC561	RGIG4599	Illumina Sequencing	tRNA	Bacteria	Firmicutes_A	Clostridia	Oscillospirales	Oscillospiraceae	Faecousia	Faecousia sp017473455
RGVC563	SVA_106_bin20	Rumen Superset	tRNA	Bacteria	Bacteroidota	Bacteroidia	Bacteroidales	Paludibacteraceae	RF16
RGVC564	RGIG5203	Illumina Sequencing	tRNA	Bacteria	Firmicutes_A	Clostridia	Oscillospirales	Oscillospiraceae
RGVC564	RGIG5433	Illumina Sequencing	tRNA	Bacteria	Bacteroidota	Bacteroidia	Bacteroidales	UBA932	Cryptobacteroides	Cryptobacteroides sp017502125
RGVC564	RGIG7439	Illumina Sequencing	tRNA	Bacteria	Bacteroidota	Bacteroidia	Bacteroidales	UBA932	Cryptobacteroides	Cryptobacteroides sp017549505
RGVC564	RGIG7513	Illumina Sequencing	tRNA	Bacteria	Bacteroidota	Bacteroidia	Bacteroidales	UBA932	Coprenecus	Coprenecus sp017546125
RGVC564	RGIG8582	Illumina Sequencing	tRNA	Bacteria	Bacteroidota	Bacteroidia	Bacteroidales	UBA932	Cryptobacteroides	Cryptobacteroides sp017938925
RGVC564	RGIG8943	Illumina Sequencing	tRNA	Bacteria	Bacteroidota	Bacteroidia	Bacteroidales	UBA932	Cryptobacteroides	Cryptobacteroides sp017938925
RGVC564	RGIG9439	Illumina Sequencing	tRNA	Bacteria	Bacteroidota	Bacteroidia	Bacteroidales	UBA932	Cryptobacteroides	Cryptobacteroides sp017631175
RGVC564	RGIG9489	Illumina Sequencing	tRNA	Bacteria	Bacteroidota	Bacteroidia	Bacteroidales	UBA932	Cryptobacteroides	Cryptobacteroides sp017630215
RGVC564	RUG14413	Rumen Superset	tRNA	Bacteria	Bacteroidota	Bacteroidia	Bacteroidales	UBA932	Cryptobacteroides	Cryptobacteroides sp900316675
RGVC569	RGIG8522	Illumina Sequencing	tRNA	Bacteria	Firmicutes	Bacilli	RF39	UBA660	RGIG4266	RGIG4266 sp017461465
RGVC570	RGIG4961	Illumina Sequencing	tRNA	Bacteria	Firmicutes_A	Clostridia	Oscillospirales	Oscillospiraceae	Dysosmobacter	Dysosmobacter sp017469475
RGVC571	RGIG7665	Illumina Sequencing	tRNA	Bacteria	Firmicutes_A	Clostridia	Oscillospirales	Oscillospiraceae	Faecousia
RGVC571	RUG14822	Rumen Superset	tRNA	Bacteria	Firmicutes_A	Clostridia	Oscillospirales	Acutalibacteraceae	UBA1213	UBA1213 sp902802985
RGVC576	RGIG8494	Illumina Sequencing	tRNA	Bacteria	Firmicutes_A	Clostridia	Lachnospirales	Lachnospiraceae	Schaedlerella
RGVC577	RGIG3076	Illumina Sequencing	tRNA	Bacteria	Firmicutes_A	Clostridia	Oscillospirales	Oscillospiraceae	Faecousia	Faecousia sp017435615
RGVC577	RGIG8581	Illumina Sequencing	tRNA	Bacteria	Firmicutes_A	Clostridia	Oscillospirales	Oscillospiraceae	Faecousia	Faecousia sp017624645
RGVC579	RGIG4022	Illumina Sequencing	tRNA	Bacteria	Firmicutes_A	Clostridia	Oscillospirales	CAG-272	CAG-448	CAG-448 sp017463485
RGVC579	RGIG4095	Illumina Sequencing	tRNA	Bacteria	Firmicutes_A	Clostridia	Oscillospirales	CAG-272	HGM12713	HGM12713 sp017462035
RGVC579	RGIG5294	Illumina Sequencing	tRNA	Bacteria	Firmicutes_A	Clostridia	Oscillospirales	CAG-272	Firm-07	Firm-07 sp017502975
RGVC579	RGIG8715	Illumina Sequencing	tRNA	Bacteria	Firmicutes_A	Clostridia	Oscillospirales	CAG-272	RGIG8715	RGIG8715 sp017622085
RGVC579	RGIG8772	Illumina Sequencing	tRNA	Bacteria	Firmicutes_A	Clostridia	Oscillospirales	CAG-272	SIG640	SIG640 sp015064885
RGVC579	RGIG9536	Illumina Sequencing	tRNA	Bacteria	Firmicutes_A	Clostridia	Oscillospirales	Acutalibacteraceae	UMGS172	UMGS172 sp017629275
RGVC579	RGIG9644	Illumina Sequencing	tRNA	Bacteria	Firmicutes_A	Clostridia	UBA1212	UBA1212	UBA1212	UBA1212 sp002309655
RGVC579	RUG14179	Rumen Superset	tRNA	Bacteria	Firmicutes_A	Clostridia	Oscillospirales	CAG-382	RUG14179	RUG14179 sp902796545
RGVC585	RGIG6250	Illumina Sequencing	tRNA	Bacteria	Bacteroidota	Bacteroidia	Bacteroidales	Rikenellaceae	Tidjanibacter	Tidjanibacter sp017521965
RGVC585	RGIG7479	Illumina Sequencing	tRNA	Bacteria	Bacteroidota	Bacteroidia	Bacteroidales	Rikenellaceae	Alistipes	Alistipes sp017558115
RGVC585	RGIG8749	Illumina Sequencing	tRNA	Bacteria	Bacteroidota	Bacteroidia	Bacteroidales	Rikenellaceae	Alistipes	Alistipes sp017621455
RGVC585	RGIG9529	Illumina Sequencing	tRNA	Bacteria	Bacteroidota	Bacteroidia	Bacteroidales	Rikenellaceae	UBA940
RGVC585	RGIG9571	Illumina Sequencing	tRNA	Bacteria	Bacteroidota	Bacteroidia	Bacteroidales	Rikenellaceae	Alistipes	Alistipes sp017628595
RGVC585	RGIG9837	Illumina Sequencing	tRNA	Bacteria	Bacteroidota	Bacteroidia	Bacteroidales	Rikenellaceae	Alistipes
RGVC585	RGIG9911	Illumina Sequencing	tRNA	Bacteria	Bacteroidota	Bacteroidia	Bacteroidales	Rikenellaceae	Alistipes	Alistipes sp017646785
RGVC585	RUG12011	Rumen Superset	tRNA	Bacteria	Bacteroidota	Bacteroidia	Bacteroidales	Paludibacteraceae	Enterocola	Enterocola sp900316995
RGVC586	RGIG255	Illumina Sequencing	tRNA	Bacteria	Firmicutes_A	Clostridia	Oscillospirales	JAAYXM01	SIG480
RGVC586	RGIG2957	Illumina Sequencing	tRNA	Bacteria	Firmicutes_A	Clostridia	Oscillospirales	JAAYXM01	SIG480	SIG480 sp017408185
RGVC586	RGIG3019	Illumina Sequencing	tRNA	Bacteria	Firmicutes_A	Clostridia	Oscillospirales	JAAYXM01	SIG480	SIG480 sp017409405
RGVC586	RGIG3045	Illumina Sequencing	tRNA	Bacteria	Firmicutes_A	Clostridia	Oscillospirales	JAAYXM01	SIG480	SIG480 sp017408185
RGVC586	RGIG9382	Illumina Sequencing	tRNA	Bacteria	Firmicutes_A	Clostridia	Oscillospirales	CAG-382	SFLA01
RGVC589	RGIG8020	Illumina Sequencing	tRNA	Bacteria	Firmicutes_A	Clostridia	Christensenellales	CAG-74	Firm-10	Firm-10 sp017620115
RGVC589	RUG11732	Rumen Superset	tRNA	Bacteria	Firmicutes_A	Clostridia	Lachnospirales	Lachnospiraceae	CAG-791	CAG-791 sp900320325
RGVC590	RGIG966	Illumina Sequencing	tRNA	Bacteria	Bacteroidota	Bacteroidia	Bacteroidales	Muribaculaceae	CAG-485	CAG-485 sp017547845
RGVC592	RGIG4611	Illumina Sequencing	tRNA	Bacteria	Firmicutes_A	Clostridia	Oscillospirales	CAG-272	CAG-448	CAG-448 sp017483125
RGVC592	RGIG938	Illumina Sequencing	tRNA	Bacteria	Firmicutes_A	Clostridia	Lachnospirales	Lachnospiraceae	Copromonas	Copromonas sp017380975
RGVC595	RGIG3139	Illumina Sequencing	tRNA	Bacteria	Firmicutes_A	Clostridia	Oscillospirales	Ruminococcaceae	CAG-115	CAG-115 sp017440445
RGVC595	RGIG4068	Illumina Sequencing	tRNA	Bacteria	Firmicutes_A	Clostridia	Oscillospirales	CAG-272	UBA1740	UBA1740 sp017462545
RGVC595	RGIG431	Illumina Sequencing	tRNA	Bacteria	Firmicutes_A	Clostridia	Oscillospirales	Acutalibacteraceae	SIG589	SIG589 sp017424125
RGVC595	RGIG6467	Illumina Sequencing	tRNA	Bacteria	Firmicutes_A	Clostridia	Peptostreptococcales	Anaerovoracaceae	CAG-238	CAG-238 sp017436705
RGVC595	RGIG7330	Illumina Sequencing	tRNA	Bacteria	Firmicutes_A	Clostridia	Oscillospirales	Acutalibacteraceae	UBA737	UBA737 sp017559885
RGVC595	RGIG899	Illumina Sequencing	tRNA	Bacteria	Firmicutes_A	Clostridia	Oscillospirales	Acutalibacteraceae	UMGS1976	UMGS1976 sp017383985
RGVC595	RGIG9717	Illumina Sequencing	tRNA	Bacteria	Firmicutes_A	Clostridia	Oscillospirales	Acutalibacteraceae	UBA737
RGVC595	RUG10608	Rumen Superset	tRNA	Bacteria	Firmicutes_A	Clostridia	Oscillospirales	Acutalibacteraceae	UBA737	UBA737 sp902762875
RGVC595	RUG11190	Rumen Superset	tRNA	Bacteria	Firmicutes_A	Clostridia	Oscillospirales	Acutalibacteraceae	UBA737	UBA737 sp902766755
RGVC595	RUG14662	Rumen Superset	tRNA	Bacteria	Firmicutes_A	Clostridia	Oscillospirales	Acutalibacteraceae	RUG592	RUG592 sp902801245
RGVC595	RUG14926	Rumen Superset	tRNA	Bacteria	Firmicutes_A	Clostridia	Oscillospirales	Ruminococcaceae	Ruminococcus	Ruminococcus flavefaciens_R
RGVC598	RGIG1694	Illumina Sequencing	tRNA	Bacteria	Firmicutes_A	Clostridia	Lachnospirales	Lachnospiraceae	RUG11237	RUG11237 sp017399445
RGVC598	RGIG4204	Illumina Sequencing	tRNA	Bacteria	Firmicutes_A	Clostridia	Oscillospirales	Oscillospiraceae	Faecousia
RGVC598	RGIG8958	Illumina Sequencing	tRNA	Bacteria	Firmicutes_A	Clostridia	Oscillospirales	Oscillospiraceae	Avoscillospira	Avoscillospira sp017938625
RGVC598	goat-flye.maxbin.002.contigs	HiFi Sequencing	CRISPR	Bacteria	Firmicutes	Bacilli	Mycoplasmatales	Mycoplasmoidaceae	Malacoplasma_A	Malacoplasma_A sp902800015
RGVC598	RUG14158	Rumen Superset	tRNA	Bacteria	Firmicutes_A	Clostridia	Oscillospirales	Oscillospiraceae	CAG-170	CAG-170 sp902796245
RGVC599	RGIG176	Illumina Sequencing	tRNA	Bacteria	Bacteroidota	Bacteroidia	Bacteroidales	Rikenellaceae	Alistipes	Alistipes sp017436185
RGVC599	RGIG436	Illumina Sequencing	tRNA	Bacteria	Bacteroidota	Bacteroidia	Bacteroidales	Rikenellaceae	Alistipes
RGVC599	RGIG5238	Illumina Sequencing	tRNA	Bacteria	Bacteroidota	Bacteroidia	Bacteroidales	Rikenellaceae	Alistipes	Alistipes sp017437045
RGVC599	RGIG6244	Illumina Sequencing	tRNA	Bacteria	Bacteroidota	Bacteroidia	Bacteroidales	Rikenellaceae	Alistipes	Alistipes sp017624955
RGVC599	RGIG6334	Illumina Sequencing	tRNA	Bacteria	Bacteroidota	Bacteroidia	Bacteroidales	Rikenellaceae	Alistipes	Alistipes sp017624955
RGVC599	RGIG7716	Illumina Sequencing	tRNA	Bacteria	Bacteroidota	Bacteroidia	Bacteroidales	Rikenellaceae	Alistipes	Alistipes sp017555975
RGVC599	RGIG8662	Illumina Sequencing	tRNA	Bacteria	Bacteroidota	Bacteroidia	Bacteroidales	Rikenellaceae	Alistipes	Alistipes sp017623115
RGVC599	RGIG9869	Illumina Sequencing	tRNA	Bacteria	Bacteroidota	Bacteroidia	Bacteroidales	Rikenellaceae	Alistipes	Alistipes sp017631275
RGVC599	RUG12058	Rumen Superset	tRNA	Bacteria	Bacteroidota	Bacteroidia	Bacteroidales	Bacteroidaceae	Prevotella	Prevotella sp900316985
RGVC599	RUG13956	Rumen Superset	tRNA	Bacteria	Bacteroidota	Bacteroidia	Bacteroidales	Paludibacteraceae	RF16	RF16 sp900317745
RGVC599	UBA4866	Rumen Superset	tRNA	Bacteria	Bacteroidota	Bacteroidia	Bacteroidales	P3	UBA10566	UBA10566 sp002399565
RGVC600	RGIG4623	Illumina Sequencing	tRNA	Bacteria	Firmicutes_A	Clostridia	Oscillospirales	Oscillospiraceae	Faecousia	Faecousia sp017473225
RGVC600	RGIG9441	Illumina Sequencing	tRNA	Bacteria	Firmicutes_A	Clostridia	Oscillospirales	Oscillospiraceae	Faecousia	Faecousia sp017631155
RGVC603	RGIG4112	Illumina Sequencing	tRNA	Bacteria	Bacteroidota	Bacteroidia	Bacteroidales	Bacteroidaceae	HGM04593	HGM04593 sp017938245
RGVC603	RGIG5296	Illumina Sequencing	tRNA	Bacteria	Fibrobacterota	Fibrobacteria	Fibrobacterales	Fibrobacteraceae	Fibrobacter	Fibrobacter sp900143055
RGVC603	RGIG7785	Illumina Sequencing	tRNA	Bacteria	Bacteroidota	Bacteroidia	Bacteroidales	Bacteroidaceae	HGM04593	HGM04593 sp017554605
RGVC603	RGIG9558	Illumina Sequencing	tRNA	Bacteria	Bacteroidota	Bacteroidia	Bacteroidales	Bacteroidaceae	UBA4372	UBA4372 sp017628845
RGVC603	RGIG9863	Illumina Sequencing	tRNA	Bacteria	Bacteroidota	Bacteroidia	Bacteroidales	Bacteroidaceae	HGM04593	HGM04593 sp017647725
RGVC603	RUG12556	Rumen Superset	tRNA	Bacteria	Bacteroidota	Bacteroidia	Bacteroidales	SZUA-534	RUG13583	RUG13583 sp902790595
RGVC603	RUG14727	Rumen Superset	tRNA	Bacteria	Bacteroidota	Bacteroidia	Bacteroidales	Bacteroidaceae	Prevotella	Prevotella sp900314655
RGVC604	RGIG1529	Illumina Sequencing	tRNA	Bacteria	Firmicutes_A	Clostridia	Christensenellales	CAG-138	PeH17	PeH17 sp017395105
RGVC604	RGIG1882	Illumina Sequencing	tRNA	Bacteria	Firmicutes_A	Clostridia	Christensenellales	CAG-138	SFEL01
RGVC604	RGIG2228	Illumina Sequencing	tRNA	Bacteria	Firmicutes_A	Clostridia	Christensenellales	CAG-138	RGIG3096	RGIG3096 sp017407205
RGVC604	RGIG227	Illumina Sequencing	tRNA	Bacteria	Firmicutes_B	Peptococcia	Peptococcales	Peptococcaceae	UBA7185	UBA7185 sp017383785
RGVC604	RGIG2640	Illumina Sequencing	tRNA	Bacteria	Firmicutes_A	Clostridia	Christensenellales	CAG-138	CAG-1024	CAG-1024 sp017429985
RGVC604	RGIG2662	Illumina Sequencing	tRNA	Bacteria	Firmicutes_A	Clostridia	Christensenellales	CAG-138	CAG-1024	CAG-1024 sp017429985
RGVC604	RGIG4322	Illumina Sequencing	tRNA	Bacteria	Firmicutes_A	Clostridia	Christensenellales	CAG-74	Faecivicinus	Faecivicinus sp017460585
RGVC604	RGIG6174	Illumina Sequencing	tRNA	Bacteria	Firmicutes_A	Clostridia	Christensenellales	CAG-74	Limiplasma	Limiplasma sp017517815
RGVC604	RGIG6260	Illumina Sequencing	tRNA	Bacteria	Firmicutes_A	Clostridia	Christensenellales	CAG-138	SFEL01
RGVC604	RGIG7564	Illumina Sequencing	tRNA	Bacteria	Firmicutes_A	Clostridia	Christensenellales	CAG-138	UBA3857	UBA3857 sp900313585
RGVC604	RGIG7606	Illumina Sequencing	tRNA	Bacteria	Firmicutes_A	Clostridia	Christensenellales	CAG-138	UBA3857	UBA3857 sp900313585
RGVC604	RGIG9939	Illumina Sequencing	tRNA	Bacteria	Bacteroidota	Bacteroidia	Bacteroidales	Paludibacteraceae	Enterocola	Enterocola sp017646225
RGVC604	RUG10133	Rumen Superset	tRNA	Bacteria	Firmicutes_A	Clostridia	Christensenellales	CAG-74	RUG563	RUG563 sp900320085
RGVC604	RUG13758	Rumen Superset	tRNA	Bacteria	Firmicutes_A	Clostridia	Christensenellales	CAG-138	UBA3792	UBA3792 sp902792295
RGVC604	RUG13931	Rumen Superset	tRNA	Bacteria	Firmicutes_A	Clostridia	Christensenellales	CAG-138	PeH17	PeH17 sp902794055
RGVC605	RGIG7897	Illumina Sequencing	tRNA	Bacteria	Firmicutes_A	Clostridia	Oscillospirales	Ruminococcaceae	RUG11783	RUG11783 sp017548485
RGVC605	RUG14480	Rumen Superset	tRNA	Bacteria	Firmicutes_A	Clostridia	Oscillospirales	Oscillospiraceae	Limivicinus	Limivicinus sp900317375
RGVC608	RGIG8797	Illumina Sequencing	tRNA	Bacteria	Firmicutes_A	Clostridia	Oscillospirales	Oscillospiraceae	Faecousia	Faecousia sp017620525
RGVC608	RGIG9045	Illumina Sequencing	tRNA	Bacteria	Firmicutes_A	Clostridia	Oscillospirales	Oscillospiraceae	Faecousia	Faecousia sp017936985
RGVC609	RGIG7416	Illumina Sequencing	tRNA	Bacteria	Firmicutes_A	Clostridia	Oscillospirales	Oscillospiraceae	CAG-83
RGVC610	RUG12370	Rumen Superset	tRNA	Bacteria	Firmicutes_A	Clostridia	Lachnospirales	Lachnospiraceae	UBA1712	UBA1712 sp902779505
RGVC610	RUG13871	Rumen Superset	tRNA	Bacteria	Firmicutes_A	Clostridia	Lachnospirales	Lachnospiraceae	Acetatifactor	Acetatifactor sp900320485
RGVC614	RGIG4706	Illumina Sequencing	tRNA	Bacteria	Firmicutes_A	Clostridia	Christensenellales	UBA1242	Onthoplasma	Onthoplasma sp017481235
RGVC614	RGIG8962	Illumina Sequencing	tRNA	Bacteria	Firmicutes_A	Clostridia	Christensenellales	UBA1242	Caccovivens	Caccovivens sp017938505
RGVC615	RGIG8458	Illumina Sequencing	tRNA	Bacteria	Firmicutes_A	Clostridia	Peptostreptococcales	Anaerovoracaceae	RUG11894	RUG11894 sp017626845
RGVC615	RGIG8476	Illumina Sequencing	tRNA	Bacteria	Firmicutes_A	Clostridia	Christensenellales	Borkfalkiaceae	RGIG8762	RGIG8762 sp017626495
RGVC618	RGIG3938	Illumina Sequencing	tRNA	Bacteria	Firmicutes_A	Clostridia	Oscillospirales	CAG-272	CAG-448	CAG-448 sp017621695
RGVC620	RGIG9120	Illumina Sequencing	tRNA	Bacteria	Firmicutes_A	Clostridia	HGM11327	HGM11327	SIG351	SIG351 sp017935525
RGVC621	RUG14337	Rumen Superset	tRNA	Bacteria	Firmicutes_A	Clostridia	Oscillospirales	Acutalibacteraceae	Ruminococcus_E	Ruminococcus_E sp900317315
RGVC622	RGIG4626	Illumina Sequencing	tRNA	Bacteria	Bacteroidota	Bacteroidia	Bacteroidales	Rikenellaceae	Alistipes	Alistipes sp015059845
RGVC622	RGIG8972	Illumina Sequencing	tRNA	Bacteria	Bacteroidota	Bacteroidia	Bacteroidales	Rikenellaceae	Alistipes	Alistipes sp015059845
RGVC622	RGIG8998	Illumina Sequencing	tRNA	Bacteria	Bacteroidota	Bacteroidia	Bacteroidales	Rikenellaceae	Alistipes	Alistipes sp017399485
RGVC622	RGIG9378	Illumina Sequencing	tRNA	Bacteria	Bacteroidota	Bacteroidia	Bacteroidales	Rikenellaceae	Alistipes	Alistipes sp017628595
RGVC622	RGIG9529	Illumina Sequencing	tRNA	Bacteria	Bacteroidota	Bacteroidia	Bacteroidales	Rikenellaceae	UBA940
RGVC622	RGIG9841	Illumina Sequencing	tRNA	Bacteria	Bacteroidota	Bacteroidia	Bacteroidales	Rikenellaceae	Alistipes	Alistipes sp900770635
RGVC622	RGIG9869	Illumina Sequencing	tRNA	Bacteria	Bacteroidota	Bacteroidia	Bacteroidales	Rikenellaceae	Alistipes	Alistipes sp017631275
RGVC622	RGIG9911	Illumina Sequencing	tRNA	Bacteria	Bacteroidota	Bacteroidia	Bacteroidales	Rikenellaceae	Alistipes	Alistipes sp017646785
RGVC626	RGIG5723	Illumina Sequencing	tRNA	Bacteria	Firmicutes	Bacilli	RF39	UBA660	Coprosoma
RGVC626	RGIG9051	Illumina Sequencing	tRNA	Bacteria	Firmicutes	Bacilli	RF39	UBA660	UBA5026	UBA5026 sp017936845
RGVC626	RUG11471	Rumen Superset	tRNA	Bacteria	Firmicutes	Bacilli	RF39	UBA660	UBA3789	UBA3789 sp900314225
RGVC626	RUG12690	Rumen Superset	tRNA	Bacteria	Firmicutes	Bacilli	RF39	UBA660	RUG11198
RGVC626	RUG13452	Rumen Superset	tRNA	Bacteria	Firmicutes	Bacilli	RF39	UBA660	UBA3789	UBA3789 sp900314225
RGVC626	RUG14284	Rumen Superset	tRNA	Bacteria	Firmicutes	Bacilli	Erysipelotrichales	Erysipelotrichaceae	RUG14284	RUG14284 sp902797585
RGVC626	RUG14702	Rumen Superset	tRNA	Bacteria	Firmicutes	Bacilli	RF39	UBA660	RUG12438	RUG12438 sp902801685
RGVC629	RGIG9455	Illumina Sequencing	tRNA	Bacteria	Firmicutes_A	Clostridia	Oscillospirales	Oscillospiraceae	Faecousia
RGVC630	RUG14822	Rumen Superset	tRNA	Bacteria	Firmicutes_A	Clostridia	Oscillospirales	Acutalibacteraceae	UBA1213	UBA1213 sp902802985
RGVC631	RGIG1028	Illumina Sequencing	tRNA	Bacteria	Firmicutes_A	Clostridia	Oscillospirales	CAG-272	RUG12395	RUG12395 sp017382555
RGVC631	RGIG8580	Illumina Sequencing	tRNA	Bacteria	Firmicutes_A	Clostridia	Oscillospirales	CAG-272	UBA1740	UBA1740 sp017621415
RGVC631	RGIG8595	Illumina Sequencing	tRNA	Bacteria	Firmicutes_A	Clostridia	Oscillospirales	CAG-272	UMGS1865	UMGS1865 sp017624395
RGVC632	RGIG6247	Illumina Sequencing	tRNA	Bacteria	Firmicutes_A	Clostridia	Oscillospirales	Oscillospiraceae	Faecousia	Faecousia sp017516785
RGVC632	RGIG8578	Illumina Sequencing	tRNA	Bacteria	Firmicutes_A	Clostridia	Oscillospirales	Oscillospiraceae	Faecousia	Faecousia sp017624715
RGVC632	RGIG8706	Illumina Sequencing	tRNA	Archaea	Halobacteriota	Methanomicrobia	Methanomicrobiales	Methanocorpusculaceae	Methanocorpusculum	Methanocorpusculum sp017622255
RGVC632	RGIG9400	Illumina Sequencing	tRNA	Bacteria	Firmicutes_A	Clostridia	Oscillospirales	Oscillospiraceae	Faecousia	Faecousia sp017632035
RGVC632	RGIG9881	Illumina Sequencing	tRNA	Bacteria	Firmicutes_A	Clostridia	Oscillospirales	Oscillospiraceae	Faecousia
RGVC632	RUG12281	Rumen Superset	tRNA	Bacteria	Firmicutes_A	Clostridia	Oscillospirales	Oscillospiraceae	Faecousia	Faecousia sp900315595
RGVC633	HUN_Bacteroides_sp_AR29	Rumen Superset	tRNA	Bacteria	Bacteroidota	Bacteroidia	Bacteroidales	Bacteroidaceae	Bacteroides	Bacteroides thetaiotaomicron
RGVC633	RGIG5296	Illumina Sequencing	tRNA	Bacteria	Fibrobacterota	Fibrobacteria	Fibrobacterales	Fibrobacteraceae	Fibrobacter	Fibrobacter sp900143055
RGVC633	RGIG7224	Illumina Sequencing	tRNA	Bacteria	Bacteroidota	Bacteroidia	Bacteroidales	Bacteroidaceae	Bacteroides	Bacteroides sp017556595
RGVC633	RGIG7485	Illumina Sequencing	tRNA	Bacteria	Bacteroidota	Bacteroidia	Bacteroidales	Bacteroidaceae	Phocaeicola
RGVC633	RGIG7747	Illumina Sequencing	tRNA	Bacteria	Bacteroidota	Bacteroidia	Bacteroidales	Bacteroidaceae	Phocaeicola
RGVC633	RGIG8945	Illumina Sequencing	tRNA	Bacteria	Bacteroidota	Bacteroidia	Bacteroidales	Bacteroidaceae	Phocaeicola	Phocaeicola sp017472925
RGVC633	RGIG925	Illumina Sequencing	tRNA	Bacteria	Bacteroidota	Bacteroidia	Bacteroidales	Paludibacteraceae	RF16	RF16 sp017457295
RGVC633	RGIG951	Illumina Sequencing	tRNA	Bacteria	Bacteroidota	Bacteroidia	Bacteroidales	Bacteroidaceae	Alloprevotella	Alloprevotella sp017383485
RGVC633	RGIG9558	Illumina Sequencing	tRNA	Bacteria	Bacteroidota	Bacteroidia	Bacteroidales	Bacteroidaceae	UBA4372	UBA4372 sp017628845
RGVC633	UBA1746	Rumen Superset	tRNA	Bacteria	Bacteroidota	Bacteroidia	Bacteroidales	Bacteroidaceae	Alloprevotella	Alloprevotella sp002314875
RGVC634	RGIG4961	Illumina Sequencing	tRNA	Bacteria	Firmicutes_A	Clostridia	Oscillospirales	Oscillospiraceae	Dysosmobacter	Dysosmobacter sp017469475
RGVC634	RGIG6004	Illumina Sequencing	tRNA	Bacteria	Firmicutes_A	Clostridia	Oscillospirales	Oscillospiraceae	Alloscillospira	Alloscillospira sp017519975
RGVC634	RGIG6739	Illumina Sequencing	tRNA	Bacteria	Firmicutes_A	Clostridia	Oscillospirales	Oscillospiraceae	UBA1774	UBA1774 sp017535635
RGVC634	RGIG7229	Illumina Sequencing	tRNA	Bacteria	Firmicutes_A	Clostridia	Oscillospirales	Butyricicoccaceae	RGIG3513	RGIG3513 sp017556565
RGVC634	RGIG9400	Illumina Sequencing	tRNA	Bacteria	Firmicutes_A	Clostridia	Oscillospirales	Oscillospiraceae	Faecousia	Faecousia sp017632035
RGVC634	RUG10005	Rumen Superset	tRNA	Bacteria	Firmicutes_A	Clostridia	Oscillospirales	Oscillospiraceae	CAG-103	CAG-103 sp900317905
RGVC634	RUG10824	Rumen Superset	tRNA	Bacteria	Firmicutes_A	Clostridia	Oscillospirales	Oscillospiraceae	Evtepia	Evtepia sp902781745
RGVC634	RUG12591	Rumen Superset	tRNA	Bacteria	Firmicutes_A	Clostridia	Oscillospirales	Oscillospiraceae	RUG626	RUG626 sp900317385
RGVC634	RUG13046	Rumen Superset	tRNA	Bacteria	Firmicutes_A	Clostridia	Oscillospirales	Oscillospiraceae	ER4	ER4 sp900317525
RGVC635	RGIG469	Illumina Sequencing	tRNA	Bacteria	Firmicutes_A	Clostridia	Oscillospirales	Butyricicoccaceae	RGIG1902	RGIG1902 sp017421885
RGVC637	RGIG7744	Illumina Sequencing	tRNA	Bacteria	Firmicutes_A	Clostridia	Oscillospirales	Oscillospiraceae	Faecousia	Faecousia sp017555395
RGVC637	RUG13751	Rumen Superset	tRNA	Bacteria	Firmicutes_A	Clostridia	Oscillospirales	Oscillospiraceae	Faecousia	Faecousia sp900316335
RGVC639	RGIG2571	Illumina Sequencing	tRNA	Bacteria	Firmicutes_A	Clostridia	Christensenellales	CAG-74	Firm-10	Firm-10 sp017431365
RGVC639	RGIG8020	Illumina Sequencing	tRNA	Bacteria	Firmicutes_A	Clostridia	Christensenellales	CAG-74	Firm-10	Firm-10 sp017620115
RGVC639	RUG11732	Rumen Superset	tRNA	Bacteria	Firmicutes_A	Clostridia	Lachnospirales	Lachnospiraceae	CAG-791	CAG-791 sp900320325
RGVC639	RUG13861	Rumen Superset	tRNA	Bacteria	Firmicutes_A	Clostridia	Christensenellales	CAG-74	UBA2862	UBA2862 sp902793325
RGVC640	RGIG3985	Illumina Sequencing	tRNA	Bacteria	Firmicutes_A	Clostridia	Oscillospirales	Oscillospiraceae	Faecousia
RGVC640	RGIG8797	Illumina Sequencing	tRNA	Bacteria	Firmicutes_A	Clostridia	Oscillospirales	Oscillospiraceae	Faecousia	Faecousia sp017620525
RGVC640	RGIG9441	Illumina Sequencing	tRNA	Bacteria	Firmicutes_A	Clostridia	Oscillospirales	Oscillospiraceae	Faecousia	Faecousia sp017631155
RGVC641	RGIG8925	Illumina Sequencing	tRNA	Bacteria	Firmicutes_A	Clostridia	Oscillospirales	Acutalibacteraceae	UBA737	UBA737 sp017939855
RGVC643	RGIG957	Illumina Sequencing	tRNA	Bacteria	Bacteroidota	Bacteroidia	Bacteroidales	Rikenellaceae	Alistipes	Alistipes sp017424405
RGVC644	RGIG4706	Illumina Sequencing	tRNA	Bacteria	Firmicutes_A	Clostridia	Christensenellales	UBA1242	Onthoplasma	Onthoplasma sp017481235
RGVC644	RGIG8962	Illumina Sequencing	tRNA	Bacteria	Firmicutes_A	Clostridia	Christensenellales	UBA1242	Caccovivens	Caccovivens sp017938505
RGVC646	RGIG4529	Illumina Sequencing	tRNA	Bacteria	Firmicutes_A	Clostridia	Oscillospirales	CAG-272	SIG701	SIG701 sp017468385
RGVC646	RGIG9089	Illumina Sequencing	tRNA	Bacteria	Firmicutes_A	Clostridia	Oscillospirales	CAG-272	UBA1740	UBA1740 sp017936125
RGVC646	RGIG9597	Illumina Sequencing	tRNA	Bacteria	Firmicutes_A	Clostridia	Oscillospirales	CAG-272	RGIG3925	RGIG3925 sp017628075
RGVC649	RGIG6259	Illumina Sequencing	tRNA	Bacteria	Firmicutes_A	Clostridia	Oscillospirales	Oscillospiraceae	Faecousia	Faecousia sp017521875
RGVC649	RGIG7744	Illumina Sequencing	tRNA	Bacteria	Firmicutes_A	Clostridia	Oscillospirales	Oscillospiraceae	Faecousia	Faecousia sp017555395
RGVC649	RUG13751	Rumen Superset	tRNA	Bacteria	Firmicutes_A	Clostridia	Oscillospirales	Oscillospiraceae	Faecousia	Faecousia sp900316335
RGVC651	RGIG9872	Illumina Sequencing	tRNA	Bacteria	Bacteroidota	Bacteroidia	Bacteroidales	Bacteroidaceae	UBA1189
RGVC651	RUG12556	Rumen Superset	tRNA	Bacteria	Bacteroidota	Bacteroidia	Bacteroidales	SZUA-534	RUG13583	RUG13583 sp902790595
RGVC651	RUG13175	Rumen Superset	tRNA	Bacteria	Bacteroidota	Bacteroidia	Bacteroidales	Bacteroidaceae	UBA4372	UBA4372 sp900320435
RGVC651	RUG13359	Rumen Superset	tRNA	Bacteria	Bacteroidota	Bacteroidia	Bacteroidales	Bacteroidaceae	UBA4372	UBA4372 sp902788315
RGVC651	RUG14346	Rumen Superset	tRNA	Bacteria	Bacteroidota	Bacteroidia	Bacteroidales	Bacteroidaceae	UBA4372	UBA4372 sp900320435
RGVC651	RUG14583	Rumen Superset	tRNA	Bacteria	Bacteroidota	Bacteroidia	Bacteroidales	Bacteroidaceae	UBA4334	UBA4334 sp902801475
RGVC651	RUG14801	Rumen Superset	tRNA	Bacteria	Bacteroidota	Bacteroidia	Bacteroidales	Bacteroidaceae	UBA4293	UBA4293 sp900316585
RGVC651	RUG14814	Rumen Superset	tRNA	Bacteria	Bacteroidota	Bacteroidia	Bacteroidales	Bacteroidaceae	UBA4372	UBA4372 sp902802815
RGVC651	SVA_105_bin16	Rumen Superset	tRNA	Bacteria	Bacteroidota	Bacteroidia	Bacteroidales	Bacteroidaceae	UBA3839
RGVC651	UBA4866	Rumen Superset	tRNA	Bacteria	Bacteroidota	Bacteroidia	Bacteroidales	P3	UBA10566	UBA10566 sp002399565
RGVC653	RGIG9362	Illumina Sequencing	tRNA	Bacteria	Firmicutes_A	Clostridia	Lachnospirales	Lachnospiraceae	RGIG3040	RGIG3040 sp017632755
RGVC653	RUG11237	Rumen Superset	tRNA	Bacteria	Firmicutes_A	Clostridia	Lachnospirales	Lachnospiraceae	RUG11237	RUG11237 sp902767135
RGVC653	RUG13686	Rumen Superset	tRNA	Bacteria	Firmicutes_A	Clostridia	Lachnospirales	Lachnospiraceae	Agathobacter	Agathobacter faecis
RGVC653	RUG13871	Rumen Superset	tRNA	Bacteria	Firmicutes_A	Clostridia	Lachnospirales	Lachnospiraceae	Acetatifactor	Acetatifactor sp900320485
RGVC653	RUG14809	Rumen Superset	tRNA	Bacteria	Firmicutes_A	Clostridia	Oscillospirales	Oscillospiraceae	Limivicinus	Limivicinus sp900321275
RGVC653	SOL_BUTY24	Rumen Superset	tRNA	Bacteria	Firmicutes_A	Clostridia	Lachnospirales	Lachnospiraceae	Acetatifactor
RGVC654	RGIG1896	Illumina Sequencing	tRNA	Bacteria	Firmicutes	Bacilli	Erysipelotrichales	Erysipelotrichaceae	RGIG1896	RGIG1896 sp017397025
RGVC654	RGIG2884	Illumina Sequencing	tRNA	Bacteria	Firmicutes	Bacilli	Acholeplasmatales	Anaeroplasmataceae	Anaeroplasma	Anaeroplasma sp017441525
RGVC654	RGIG5753	Illumina Sequencing	tRNA	Bacteria	Firmicutes	Bacilli	Erysipelotrichales	Erysipelotrichaceae	RGIG5669	RGIG5669 sp017431225
RGVC658	RGIG255	Illumina Sequencing	tRNA	Bacteria	Firmicutes_A	Clostridia	Oscillospirales	JAAYXM01	SIG480
RGVC658	RGIG2957	Illumina Sequencing	tRNA	Bacteria	Firmicutes_A	Clostridia	Oscillospirales	JAAYXM01	SIG480	SIG480 sp017408185
RGVC658	RGIG3019	Illumina Sequencing	tRNA	Bacteria	Firmicutes_A	Clostridia	Oscillospirales	JAAYXM01	SIG480	SIG480 sp017409405
RGVC658	RGIG3045	Illumina Sequencing	tRNA	Bacteria	Firmicutes_A	Clostridia	Oscillospirales	JAAYXM01	SIG480	SIG480 sp017408185
RGVC658	RGIG9382	Illumina Sequencing	tRNA	Bacteria	Firmicutes_A	Clostridia	Oscillospirales	CAG-382	SFLA01
RGVC661	HUN_Ruminococcus_sp_NK3A76	Rumen Superset	tRNA	Bacteria	Firmicutes_A	Clostridia	Oscillospirales	Ruminococcaceae	Ruminococcus_D	Ruminococcus_D sp000686125
RGVC661	RGIG2413	Illumina Sequencing	tRNA	Archaea	Methanobacteriota	Methanobacteria	Methanobacteriales	Methanobacteriaceae	Methanobrevibacter_A	Methanobrevibacter_A sp017434525
RGVC661	RGIG4659	Illumina Sequencing	tRNA	Bacteria	Firmicutes_A	Clostridia	Oscillospirales	Ruminococcaceae	Negativibacillus
RGVC661	RGIG4697	Illumina Sequencing	tRNA	Bacteria	Firmicutes_A	Clostridia	Oscillospirales	CAG-272	RGIG3925	RGIG3925 sp017481495
RGVC661	RUG11873	Rumen Superset	tRNA	Bacteria	Firmicutes_A	Clostridia	Oscillospirales	Acutalibacteraceae	RUG11462	RUG11462 sp902773485
RGVC661	RUG13599	Rumen Superset	tRNA	Bacteria	Firmicutes_A	Clostridia	Oscillospirales	Ruminococcaceae	RUG12519	RUG12519 sp902790675
RGVC661	RUG13751	Rumen Superset	tRNA	Bacteria	Firmicutes_A	Clostridia	Oscillospirales	Oscillospiraceae	Faecousia	Faecousia sp900316335
RGVC661	RUG14522	Rumen Superset	tRNA	Bacteria	Firmicutes_A	Clostridia	Oscillospirales	Acutalibacteraceae	Ruminococcus_E	Ruminococcus_E sp900317315
RGVC661	RUG14926	Rumen Superset	tRNA	Bacteria	Firmicutes_A	Clostridia	Oscillospirales	Ruminococcaceae	Ruminococcus	Ruminococcus flavefaciens_R
RGVC663	RGIG1694	Illumina Sequencing	tRNA	Bacteria	Firmicutes_A	Clostridia	Lachnospirales	Lachnospiraceae	RUG11237	RUG11237 sp017399445
RGVC663	RGIG6484	Illumina Sequencing	tRNA	Bacteria	Firmicutes_A	Clostridia	Oscillospirales	Oscillospiraceae	RGIG3566	RGIG3566 sp017501805
RGVC663	RGIG7290	Illumina Sequencing	tRNA	Bacteria	Firmicutes_A	Clostridia	Oscillospirales	Ruminococcaceae	UMGS1668	UMGS1668 sp017547705
RGVC663	RGIG7498	Illumina Sequencing	tRNA	Bacteria	Firmicutes_A	Clostridia	Oscillospirales	Oscillospiraceae	Faecousia
RGVC663	RGIG8706	Illumina Sequencing	tRNA	Archaea	Halobacteriota	Methanomicrobia	Methanomicrobiales	Methanocorpusculaceae	Methanocorpusculum	Methanocorpusculum sp017622255
RGVC664	RGIG2184	Illumina Sequencing	tRNA	Bacteria	Firmicutes_A	Clostridia	Oscillospirales	Oscillospiraceae	Dysosmobacter	Dysosmobacter sp017410185
RGVC669	RGIG1674	Illumina Sequencing	tRNA	Bacteria	Firmicutes_A	Clostridia	Monoglobales	Monoglobaceae	UMGS1820
RGVC669	RGIG2094	Illumina Sequencing	tRNA	Bacteria	Firmicutes_A	Clostridia	RGIG6154	RGIG6154	RGIG2094	RGIG2094 sp017409875
RGVC669	RGIG3998	Illumina Sequencing	tRNA	Bacteria	Firmicutes_A	Clostridia	UMGS1883	UMGS1883	UMGS1883	UMGS1883 sp017451505
RGVC669	RUG10832	Rumen Superset	tRNA	Bacteria	Firmicutes_A	Clostridia	Monoglobales	Monoglobaceae	UMGS1820	UMGS1820 sp900545865
RGVC669	RUG12270	Rumen Superset	tRNA	Bacteria	Firmicutes_A	Clostridia	Monoglobales	Monoglobaceae	UMGS1820	UMGS1820 sp902777435
RGVC670	RUG13749	Rumen Superset	tRNA	Bacteria	Firmicutes_A	Clostridia	Lachnospirales	Lachnospiraceae	Eubacterium_Q	Eubacterium_Q sp900316715
RGVC678	RGIG3912	Illumina Sequencing	tRNA	Bacteria	Firmicutes_A	Clostridia	Christensenellales	Borkfalkiaceae	UBA10281	UBA10281 sp017453045
RGVC678	RGIG4564	Illumina Sequencing	tRNA	Bacteria	Firmicutes_A	Clostridia	UMGS1883	UMGS1883	RGIG1927	RGIG1927 sp017467965
RGVC678	RGIG7409	Illumina Sequencing	tRNA	Bacteria	Firmicutes_A	Clostridia	Christensenellales	Borkfalkiaceae	HGM11412	HGM11412 sp017558825
RGVC678	RGIG8643	Illumina Sequencing	tRNA	Bacteria	Firmicutes_A	Clostridia	Christensenellales	CAG-552	RUG12826	RUG12826 sp017623455
RGVC678	RUG12289	Rumen Superset	tRNA	Bacteria	Firmicutes_C	Negativicutes	Selenomonadales	Selenomonadaceae	RUG12372	RUG12372 sp902777615
RGVC678	RUG14241	Rumen Superset	tRNA	Bacteria	Firmicutes_A	Clostridia	Christensenellales	Borkfalkiaceae	UBA7597	UBA7597 sp900542935
RGVC679	RGIG1669	Illumina Sequencing	tRNA	Bacteria	Firmicutes_A	Clostridia	Oscillospirales	Oscillospiraceae	Lawsonibacter	Lawsonibacter sp017416685
RGVC679	RGIG8669	Illumina Sequencing	tRNA	Bacteria	Firmicutes_A	Clostridia	Oscillospirales	Oscillospiraceae	Faecousia	Faecousia sp017622995
RGVC679	RGIG8933	Illumina Sequencing	tRNA	Bacteria	Firmicutes_A	Clostridia	Oscillospirales	Oscillospiraceae	Faecousia
RGVC679	RGIG8937	Illumina Sequencing	tRNA	Bacteria	Firmicutes_A	Clostridia	Oscillospirales	Oscillospiraceae	Faecousia	Faecousia sp017939025
RGVC679	RGIG9455	Illumina Sequencing	tRNA	Bacteria	Firmicutes_A	Clostridia	Oscillospirales	Oscillospiraceae	Faecousia
RGVC679	RGIG9881	Illumina Sequencing	tRNA	Bacteria	Firmicutes_A	Clostridia	Oscillospirales	Oscillospiraceae	Faecousia
RGVC682	RGIG2180	Illumina Sequencing	tRNA	Bacteria	Firmicutes_A	Clostridia	Oscillospirales	JAAYXM01	SIG480	SIG480 sp017408185
RGVC682	RGIG942	Illumina Sequencing	tRNA	Bacteria	Firmicutes_A	Clostridia	Oscillospirales	Acutalibacteraceae	UMGS1976	UMGS1976 sp017383985
RGVC682	RUG14883	Rumen Superset	tRNA	Bacteria	Firmicutes_A	Clostridia	Oscillospirales	Acutalibacteraceae	RUG592	RUG592 sp900317815
RGVC684	RUG14822	Rumen Superset	tRNA	Bacteria	Firmicutes_A	Clostridia	Oscillospirales	Acutalibacteraceae	UBA1213	UBA1213 sp902802985
RGVC686	UBA1746	Rumen Superset	tRNA	Bacteria	Bacteroidota	Bacteroidia	Bacteroidales	Bacteroidaceae	Alloprevotella	Alloprevotella sp002314875
RGVC688	RGIG381	Illumina Sequencing	tRNA	Bacteria	Firmicutes_A	Clostridia	Oscillospirales	Oscillospiraceae	Faecousia	Faecousia sp017380435
RGVC688	RGIG7290	Illumina Sequencing	tRNA	Bacteria	Firmicutes_A	Clostridia	Oscillospirales	Ruminococcaceae	UMGS1668	UMGS1668 sp017547705
RGVC688	RGIG7498	Illumina Sequencing	tRNA	Bacteria	Firmicutes_A	Clostridia	Oscillospirales	Oscillospiraceae	Faecousia
RGVC688	RGIG8706	Illumina Sequencing	tRNA	Archaea	Halobacteriota	Methanomicrobia	Methanomicrobiales	Methanocorpusculaceae	Methanocorpusculum	Methanocorpusculum sp017622255
RGVC692	RGIG10305	Illumina Sequencing	tRNA	Bacteria	Firmicutes_A	Clostridia	Christensenellales	Borkfalkiaceae	RGIG4074
RGVC692	RGIG5378	Illumina Sequencing	tRNA	Bacteria	Firmicutes_A	Clostridia	Christensenellales	Borkfalkiaceae	UBA1259	UBA1259 sp017503265
RGVC692	RGIG7786	Illumina Sequencing	tRNA	Bacteria	Firmicutes_A	Clostridia	Christensenellales	Borkfalkiaceae	UBA1259	UBA1259 sp017554545
RGVC692	RGIG7995	Illumina Sequencing	tRNA	Bacteria	Firmicutes_A	Clostridia	Christensenellales	Borkfalkiaceae	UBA1259	UBA1259 sp002308755
RGVC693	goat-flye.maxbin.002.contigs	HiFi Sequencing	tRNA	Bacteria	Firmicutes	Bacilli	Mycoplasmatales	Mycoplasmoidaceae	Malacoplasma_A	Malacoplasma_A sp902800015
RGVC704	RGIG8730	Illumina Sequencing	tRNA	Bacteria	Firmicutes_A	Clostridia	Oscillospirales	Oscillospiraceae	Faecousia	Faecousia sp017621795
RGVC704	RGIG9475	Illumina Sequencing	tRNA	Bacteria	Firmicutes_A	Clostridia	Oscillospirales	Oscillospiraceae	Faecousia	Faecousia sp017630495
RGVC704	RUG12832	Rumen Superset	tRNA	Bacteria	Firmicutes_A	Clostridia	Oscillospirales	Oscillospiraceae	ER4	ER4 sp902783035
RGVC704	RUG14158	Rumen Superset	tRNA	Bacteria	Firmicutes_A	Clostridia	Oscillospirales	Oscillospiraceae	CAG-170	CAG-170 sp902796245
RGVC708	RGIG2780	Illumina Sequencing	tRNA	Bacteria	Firmicutes_A	Clostridia	Oscillospirales	Ruminococcaceae	Firm-04	Firm-04 sp017427265
RGVC708	RGIG4308	Illumina Sequencing	tRNA	Bacteria	Firmicutes_A	Clostridia	Oscillospirales	Ruminococcaceae	Firm-04	Firm-04 sp017460835
RGVC708	RGIG5975	Illumina Sequencing	tRNA	Bacteria	Firmicutes_A	Clostridia	Oscillospirales	Ruminococcaceae	Firm-04	Firm-04 sp017545185
RGVC708	RGIG7978	Illumina Sequencing	tRNA	Bacteria	Firmicutes_A	Clostridia	Oscillospirales	Ruminococcaceae	Firm-04	Firm-04 sp017550355
RGVC708	RGIG7982	Illumina Sequencing	tRNA	Bacteria	Firmicutes_A	Clostridia	Oscillospirales	Ruminococcaceae	Firm-04	Firm-04 sp017550285
RGVC708	RGIG8983	Illumina Sequencing	tRNA	Bacteria	Firmicutes_A	Clostridia	Oscillospirales	Butyricicoccaceae	UBA4644	UBA4644 sp017620505
RGVC708	RGIG9130	Illumina Sequencing	tRNA	Bacteria	Firmicutes_A	Clostridia	Oscillospirales	Ruminococcaceae	Ruminiclostridium_E	Ruminiclostridium_E sp017935365
RGVC708	RUG14184	Rumen Superset	tRNA	Bacteria	Firmicutes_A	Clostridia	Oscillospirales	Ruminococcaceae	UBA3855	UBA3855 sp902783005
RGVC708	RUG14407	Rumen Superset	tRNA	Bacteria	Firmicutes_A	Clostridia	Oscillospirales	Acutalibacteraceae	RUG420	RUG420 sp900317085
RGVC711	RGIG5588	Illumina Sequencing	tRNA	Bacteria	Bacteroidota	Bacteroidia	Bacteroidales	Bacteroidaceae	HGM04593	HGM04593 sp017507105
RGVC714	RGIG6256	Illumina Sequencing	tRNA	Bacteria	Firmicutes_A	Clostridia	Christensenellales	CAG-74	Limiplasma	Limiplasma sp017516765
RGVC714	RGIG7318	Illumina Sequencing	tRNA	Bacteria	Firmicutes_A	Clostridia	Christensenellales	CAG-74	Limiplasma	Limiplasma sp017547285
RGVC714	RUG11247	Rumen Superset	tRNA	Bacteria	Firmicutes_A	Clostridia	Christensenellales	CAG-74	RUG11247	RUG11247 sp902767315
RGVC714	RUG13367	Rumen Superset	tRNA	Bacteria	Firmicutes_A	Clostridia	Christensenellales	CAG-74	RUG563	RUG563 sp902788445
RGVC714	RUG13574	Rumen Superset	tRNA	Bacteria	Firmicutes_A	Clostridia	Christensenellales	CAG-74	UBA2862	UBA2862 sp902790525
RGVC714	RUG14874	Rumen Superset	tRNA	Bacteria	Firmicutes_A	Clostridia	Oscillospirales	Acutalibacteraceae	UBA1213	UBA1213 sp900319255
RGVC715	RGIG3414	Illumina Sequencing	tRNA	Bacteria	Firmicutes_A	Clostridia	Christensenellales	Borkfalkiaceae	UBA1259	UBA1259 sp017445995
RGVC715	RGIG3732	Illumina Sequencing	tRNA	Bacteria	Firmicutes_A	Clostridia	Christensenellales	Borkfalkiaceae	RGIG3732	RGIG3732 sp017453885
RGVC715	RGIG4570	Illumina Sequencing	tRNA	Bacteria	Firmicutes_A	Clostridia	Christensenellales	CAG-314	Fimimonas	Fimimonas sp017457305
RGVC715	RGIG5378	Illumina Sequencing	tRNA	Bacteria	Firmicutes_A	Clostridia	Christensenellales	Borkfalkiaceae	UBA1259	UBA1259 sp017503265
RGVC715	RGIG7481	Illumina Sequencing	tRNA	Bacteria	Firmicutes_A	Clostridia	Christensenellales	Borkfalkiaceae	UBA1259	UBA1259 sp017558105
RGVC715	RUG11243	Rumen Superset	tRNA	Bacteria	Firmicutes_A	Clostridia	Christensenellales	Borkfalkiaceae	UBA1259	UBA1259 sp902767225
RGVC715	RUG13273	Rumen Superset	tRNA	Bacteria	Firmicutes_A	Clostridia	Christensenellales	Borkfalkiaceae	UBA1259	UBA1259 sp900320065
RGVC716	RGIG4163	Illumina Sequencing	tRNA	Bacteria	Firmicutes_A	Clostridia	Oscillospirales	Oscillospiraceae	Faecousia	Faecousia sp017466215
RGVC716	RGIG7416	Illumina Sequencing	tRNA	Bacteria	Firmicutes_A	Clostridia	Oscillospirales	Oscillospiraceae	CAG-83
RGVC716	RUG10937	Rumen Superset	tRNA	Bacteria	Firmicutes_A	Clostridia	Oscillospirales	Oscillospiraceae	CAG-83	CAG-83 sp902765025
RGVC716	RUG11372	Rumen Superset	tRNA	Bacteria	Firmicutes_A	Clostridia	Oscillospirales	Acutalibacteraceae	Ruminococcus_E	Ruminococcus_E sp900317595
RGVC725	RGIG7481	Illumina Sequencing	tRNA	Bacteria	Firmicutes_A	Clostridia	Christensenellales	Borkfalkiaceae	UBA1259	UBA1259 sp017558105
RGVC725	RGIG8020	Illumina Sequencing	tRNA	Bacteria	Firmicutes_A	Clostridia	Christensenellales	CAG-74	Firm-10	Firm-10 sp017620115
RGVC725	RGIG8722	Illumina Sequencing	tRNA	Bacteria	Firmicutes_A	Clostridia	Christensenellales	Borkfalkiaceae	UBA1259	UBA1259 sp017621955
RGVC725	RGIG910	Illumina Sequencing	tRNA	Bacteria	Firmicutes_A	Clostridia	Oscillospirales	Acutalibacteraceae	UBA737	UBA737 sp017391425
RGVC725	RGIG9155	Illumina Sequencing	tRNA	Bacteria	Firmicutes_A	Clostridia	Christensenellales	CAG-917	RGIG4097	RGIG4097 sp017461985
RGVC725	RUG13273	Rumen Superset	tRNA	Bacteria	Firmicutes_A	Clostridia	Christensenellales	Borkfalkiaceae	UBA1259	UBA1259 sp900320065
RGVC725	RUG14241	Rumen Superset	tRNA	Bacteria	Firmicutes_A	Clostridia	Christensenellales	Borkfalkiaceae	UBA7597	UBA7597 sp900542935
RGVC726	RGIG5356	Illumina Sequencing	tRNA	Bacteria	Firmicutes_A	Clostridia	Oscillospirales	Acutalibacteraceae	RUG806	RUG806 sp015066205
RGVC726	RUG10026	Rumen Superset	tRNA	Bacteria	Firmicutes_A	Clostridia	Christensenellales	RUG350	RUG350	RUG350 sp900315995
RGVC729	RGIG4182	Illumina Sequencing	tRNA	Bacteria	Firmicutes_A	Clostridia	Lachnospirales	Lachnospiraceae	Acetatifactor	Acetatifactor sp017465845
RGVC729	RGIG5042	Illumina Sequencing	tRNA	Bacteria	Firmicutes_A	Clostridia	Lachnospirales	Lachnospiraceae	Acetatifactor
RGVC729	RGIG6149	Illumina Sequencing	tRNA	Bacteria	Firmicutes_A	Clostridia	Lachnospirales	Lachnospiraceae	Agathobacter	Agathobacter sp017523185
RGVC729	RUG12370	Rumen Superset	tRNA	Bacteria	Firmicutes_A	Clostridia	Lachnospirales	Lachnospiraceae	UBA1712	UBA1712 sp902779505
RGVC729	RUG12760	Rumen Superset	tRNA	Bacteria	Firmicutes_A	Clostridia	Lachnospirales	Lachnospiraceae	CAG-127	CAG-127 sp900319515
RGVC729	RUG13558	Rumen Superset	tRNA	Bacteria	Firmicutes_A	Clostridia	Lachnospirales	Lachnospiraceae	ISDg	ISDg sp902787715
RGVC729	RUG14141	Rumen Superset	tRNA	Bacteria	Firmicutes_A	Clostridia	Lachnospirales	Lachnospiraceae	Acetatifactor	Acetatifactor sp902796105
RGVC729	RUG14770	Rumen Superset	tRNA	Bacteria	Firmicutes_A	Clostridia	Lachnospirales	Lachnospiraceae	UBA1066	UBA1066 sp900314565
RGVC729	RUG14789	Rumen Superset	tRNA	Bacteria	Firmicutes_A	Clostridia	Lachnospirales	Lachnospiraceae	CAG-791	CAG-791 sp900320325
RGVC729	RUG14833	Rumen Superset	tRNA	Bacteria	Firmicutes_A	Clostridia	Lachnospirales	Lachnospiraceae	UBA3766	UBA3766 sp902803015
RGVC729	RUG14938	Rumen Superset	tRNA	Bacteria	Firmicutes_A	Clostridia	Lachnospirales	Lachnospiraceae	RUG147	RUG147 sp900315495
RGVC729	SOL_BUTY24	Rumen Superset	tRNA	Bacteria	Firmicutes_A	Clostridia	Lachnospirales	Lachnospiraceae	Acetatifactor
RGVC731	RGIG3096	Illumina Sequencing	tRNA	Bacteria	Firmicutes_A	Clostridia	Christensenellales	CAG-138	RGIG3096	RGIG3096 sp017435185
RGVC731	RGIG910	Illumina Sequencing	tRNA	Bacteria	Firmicutes_A	Clostridia	Oscillospirales	Acutalibacteraceae	UBA737	UBA737 sp017391425
RGVC731	RUG13342	Rumen Superset	tRNA	Bacteria	Firmicutes_A	Clostridia	Oscillospirales	Acutalibacteraceae	UBA737	UBA737 sp902762875
RGVC732	RUG13689	Rumen Superset	tRNA	Bacteria	Firmicutes	Bacilli	RF39	UBA660	CAG-417	CAG-417 sp902791625
RGVC732	RUG14409	Rumen Superset	tRNA	Bacteria	Firmicutes	Bacilli	RF39	UBA660	UBA3789	UBA3789 sp902793315
RGVC732	SVA_102_bin56	Rumen Superset	tRNA	Bacteria	Firmicutes	Bacilli	RF39	UBA660	Coprovivens
RGVC735	RUG12287	Rumen Superset	tRNA	Bacteria	Firmicutes_A	Clostridia	Oscillospirales	Oscillospiraceae	Limivicinus
RGVC735	RUG14822	Rumen Superset	tRNA	Bacteria	Firmicutes_A	Clostridia	Oscillospirales	Acutalibacteraceae	UBA1213	UBA1213 sp902802985
RGVC736	RGIG4186	Illumina Sequencing	tRNA	Bacteria	Bacteroidota	Bacteroidia	Bacteroidales	Bacteroidaceae	Phocaeicola	Phocaeicola sp017466635
RGVC736	RGIG8757	Illumina Sequencing	tRNA	Bacteria	Bacteroidota	Bacteroidia	Bacteroidales	Bacteroidaceae	Phocaeicola
RGVC736	RGIG9835	Illumina Sequencing	tRNA	Bacteria	Bacteroidota	Bacteroidia	Bacteroidales	Paludibacteraceae	RGIG9608	RGIG9608 sp017648235
RGVC736	RUG12011	Rumen Superset	tRNA	Bacteria	Bacteroidota	Bacteroidia	Bacteroidales	Paludibacteraceae	Enterocola	Enterocola sp900316995
RGVC736	RUG12062	Rumen Superset	tRNA	Bacteria	Bacteroidota	Bacteroidia	Bacteroidales	Bacteroidaceae	UBA2918	UBA2918 sp002349865
RGVC736	RUG14614	Rumen Superset	tRNA	Bacteria	Bacteroidota	Bacteroidia	Bacteroidales	Bacteroidaceae	UBA1179	UBA1179 sp902774335
RGVC736	UBA4359	Rumen Superset	tRNA	Bacteria	Bacteroidota	Bacteroidia	Bacteroidales	Bacteroidaceae	UBA4334	UBA4334 sp002393555
RGVC738	RGIG8799	Illumina Sequencing	tRNA	Bacteria	Firmicutes_A	Clostridia	Oscillospirales	Butyricicoccaceae	UBA4644	UBA4644 sp017620505
RGVC739	RGIG7713	Illumina Sequencing	tRNA	Bacteria	Bacteroidota	Bacteroidia	Bacteroidales	Rikenellaceae	Alistipes	Alistipes sp900769405
RGVC739	RGIG889	Illumina Sequencing	tRNA	Bacteria	Bacteroidota	Bacteroidia	Bacteroidales	Rikenellaceae	Alistipes	Alistipes sp900770585
RGVC740	RGIG4469	Illumina Sequencing	tRNA	Bacteria	Firmicutes_A	Clostridia	Oscillospirales	Oscillospiraceae	Dysosmobacter	Dysosmobacter sp017469475
RGVC740	RUG11719	Rumen Superset	tRNA	Bacteria	Firmicutes_A	Clostridia	Oscillospirales	Oscillospiraceae	RUG626	RUG626 sp900317385
RGVC742	RGIG1694	Illumina Sequencing	tRNA	Bacteria	Firmicutes_A	Clostridia	Lachnospirales	Lachnospiraceae	RUG11237	RUG11237 sp017399445
RGVC742	RGIG1703	Illumina Sequencing	tRNA	Bacteria	Firmicutes_A	Clostridia	Oscillospirales	Oscillospiraceae	Faecousia	Faecousia sp017416325
RGVC742	RGIG2150	Illumina Sequencing	tRNA	Bacteria	Firmicutes_A	Clostridia	Oscillospirales	Oscillospiraceae	Faecousia	Faecousia sp017408725
RGVC742	RGIG4599	Illumina Sequencing	tRNA	Bacteria	Firmicutes_A	Clostridia	Oscillospirales	Oscillospiraceae	Faecousia	Faecousia sp017473455
RGVC742	RGIG4670	Illumina Sequencing	tRNA	Bacteria	Firmicutes_A	Clostridia	Oscillospirales	Oscillospiraceae	Faecousia
RGVC742	RGIG6289	Illumina Sequencing	tRNA	Bacteria	Firmicutes_A	Clostridia	Oscillospirales	Oscillospiraceae	Faecousia	Faecousia sp017521485
RGVC742	RGIG7498	Illumina Sequencing	tRNA	Bacteria	Firmicutes_A	Clostridia	Oscillospirales	Oscillospiraceae	Faecousia
RGVC742	RGIG8578	Illumina Sequencing	tRNA	Bacteria	Firmicutes_A	Clostridia	Oscillospirales	Oscillospiraceae	Faecousia	Faecousia sp017624715
RGVC742	RGIG8705	Illumina Sequencing	tRNA	Bacteria	Firmicutes_A	Clostridia	Oscillospirales	Oscillospiraceae	Faecousia	Faecousia sp017622295
RGVC742	RGIG9045	Illumina Sequencing	tRNA	Bacteria	Firmicutes_A	Clostridia	Oscillospirales	Oscillospiraceae	Faecousia	Faecousia sp017936985
RGVC742	RGIG9400	Illumina Sequencing	tRNA	Bacteria	Firmicutes_A	Clostridia	Oscillospirales	Oscillospiraceae	Faecousia	Faecousia sp017632035
RGVC742	RGIG9881	Illumina Sequencing	tRNA	Bacteria	Firmicutes_A	Clostridia	Oscillospirales	Oscillospiraceae	Faecousia
RGVC742	RUG12281	Rumen Superset	tRNA	Bacteria	Firmicutes_A	Clostridia	Oscillospirales	Oscillospiraceae	Faecousia	Faecousia sp900315595
RGVC743	RGIG3167	Illumina Sequencing	tRNA	Bacteria	Firmicutes_A	Clostridia	Monoglobales	Firm-18	RGIG1864	RGIG1864 sp017408205
RGVC745	RGIG8947	Illumina Sequencing	tRNA	Bacteria	Firmicutes_A	Clostridia	Oscillospirales	CAG-272	CAG-448	CAG-448 sp017938885
RGVC745	RUG14199	Rumen Superset	tRNA	Bacteria	Firmicutes_A	Clostridia	Oscillospirales	CAG-272	RUG14199	RUG14199 sp902796675
RGVC746	RGIG8483	Illumina Sequencing	tRNA	Bacteria	Firmicutes_A	Clostridia	Christensenellales	Borkfalkiaceae	Scatosoma	Scatosoma sp017626305
RGVC747	RGIG7416	Illumina Sequencing	tRNA	Bacteria	Firmicutes_A	Clostridia	Oscillospirales	Oscillospiraceae	CAG-83
RGVC747	RUG13046	Rumen Superset	tRNA	Bacteria	Firmicutes_A	Clostridia	Oscillospirales	Oscillospiraceae	ER4	ER4 sp900317525
RGVC751	HUN_Oscillibacter_sp_PC13	Rumen Superset	tRNA	Bacteria	Firmicutes_A	Clostridia	Oscillospirales	Oscillospiraceae	Dysosmobacter	Dysosmobacter sp900115635
RGVC751	RGIG2184	Illumina Sequencing	tRNA	Bacteria	Firmicutes_A	Clostridia	Oscillospirales	Oscillospiraceae	Dysosmobacter	Dysosmobacter sp017410185
RGVC751	RGIG6644	Illumina Sequencing	tRNA	Bacteria	Firmicutes_A	Clostridia	Oscillospirales	Oscillospiraceae	Dysosmobacter	Dysosmobacter sp017527365
RGVC751	RUG11719	Rumen Superset	tRNA	Bacteria	Firmicutes_A	Clostridia	Oscillospirales	Oscillospiraceae	RUG626	RUG626 sp900317385
RGVC751	RUG14754	Rumen Superset	tRNA	Bacteria	Firmicutes_A	Clostridia	Oscillospirales	Oscillospiraceae	Limivicinus	Limivicinus sp902802215
RGVC752	RGIG8647	Illumina Sequencing	tRNA	Bacteria	Firmicutes_A	Clostridia	Oscillospirales	CAG-272	Flemingibacterium
RGVC756	RGIG5205	Illumina Sequencing	tRNA	Bacteria	Bacteroidota	Bacteroidia	Bacteroidales	Rikenellaceae	Alistipes	Alistipes sp017463585
RGVC756	RGIG6283	Illumina Sequencing	tRNA	Bacteria	Bacteroidota	Bacteroidia	Bacteroidales	Rikenellaceae	Alistipes	Alistipes sp017463585
RGVC756	RGIG8936	Illumina Sequencing	tRNA	Bacteria	Bacteroidota	Bacteroidia	Bacteroidales	Rikenellaceae	Alistipes	Alistipes sp017442365
RGVC756	RGIG939	Illumina Sequencing	tRNA	Bacteria	Bacteroidota	Bacteroidia	Bacteroidales	Rikenellaceae	Alistipes	Alistipes sp017938765
RGVC756	RGIG9557	Illumina Sequencing	tRNA	Bacteria	Bacteroidota	Bacteroidia	Bacteroidales	Rikenellaceae	CAJGBR01
RGVC756	RGIG9841	Illumina Sequencing	tRNA	Bacteria	Bacteroidota	Bacteroidia	Bacteroidales	Rikenellaceae	Alistipes	Alistipes sp900770635
RGVC756	RGIG9853	Illumina Sequencing	tRNA	Bacteria	Bacteroidota	Bacteroidia	Bacteroidales	Rikenellaceae	Alistipes	Alistipes sp900769525
RGVC756	RGIG9868	Illumina Sequencing	tRNA	Bacteria	Bacteroidota	Bacteroidia	Bacteroidales	Rikenellaceae	Alistipes	Alistipes sp017647625
RGVC756	UBA4866	Rumen Superset	tRNA	Bacteria	Bacteroidota	Bacteroidia	Bacteroidales	P3	UBA10566	UBA10566 sp002399565
RGVC758	RGIG4266	Illumina Sequencing	tRNA	Bacteria	Firmicutes	Bacilli	RF39	UBA660	RGIG4266	RGIG4266 sp017461465
RGVC758	RUG11118	Rumen Superset	tRNA	Bacteria	Firmicutes	Bacilli	RF39	UBA660	CAG-533	CAG-533 sp000434495
RGVC758	RUG11198	Rumen Superset	tRNA	Bacteria	Firmicutes	Bacilli	RF39	UBA660	RUG11198	RUG11198 sp902766815
RGVC759	RGIG4739	Illumina Sequencing	tRNA	Bacteria	Firmicutes_A	Clostridia	Oscillospirales	Acutalibacteraceae	UBA6857	UBA6857 sp017472225
RGVC759	RGIG5442	Illumina Sequencing	tRNA	Bacteria	Firmicutes_A	Clostridia	Oscillospirales	Acutalibacteraceae	UBA6857	UBA6857 sp017396515
RGVC759	RGIG6218	Illumina Sequencing	tRNA	Bacteria	Firmicutes_A	Clostridia	Oscillospirales	Acutalibacteraceae	UBA6857	UBA6857 sp017522205
RGVC759	RGIG8518	Illumina Sequencing	tRNA	Bacteria	Firmicutes_A	Clostridia	Oscillospirales	Acutalibacteraceae	CAG-488	CAG-488 sp017625835
RGVC759	RUG11941	Rumen Superset	tRNA	Bacteria	Firmicutes_A	Clostridia	Oscillospirales	Acutalibacteraceae	RGIG2774	RGIG2774 sp902774165
RGVC759	RUG13540	Rumen Superset	tRNA	Bacteria	Firmicutes_A	Clostridia	Oscillospirales	Acutalibacteraceae	UBA6857	UBA6857 sp902786285
RGVC760	RGIG1902	Illumina Sequencing	tRNA	Bacteria	Firmicutes_A	Clostridia	Oscillospirales	Butyricicoccaceae	RGIG1902	RGIG1902 sp017396925
RGVC760	RGIG2227	Illumina Sequencing	tRNA	Bacteria	Firmicutes_A	Clostridia	Oscillospirales	Butyricicoccaceae	RGIG1902	RGIG1902 sp017396925
RGVC760	RGIG2763	Illumina Sequencing	tRNA	Bacteria	Firmicutes_A	Clostridia	Oscillospirales	BX7	Galloscillospira_B	Galloscillospira_B sp017427525
RGVC760	RGIG292	Illumina Sequencing	tRNA	Bacteria	Firmicutes_A	Clostridia	Oscillospirales	Butyricicoccaceae	RGIG1902	RGIG1902 sp017421885
RGVC760	RGIG3143	Illumina Sequencing	tRNA	Bacteria	Firmicutes_A	Clostridia	Oscillospirales	Butyricicoccaceae	RGIG1902	RGIG1902 sp017407765
RGVC760	RGIG3624	Illumina Sequencing	tRNA	Bacteria	Firmicutes_A	Clostridia	Oscillospirales	Butyricicoccaceae	UBA4644	UBA4644 sp017455565
RGVC760	RGIG4681	Illumina Sequencing	tRNA	Bacteria	Firmicutes_A	Clostridia	Oscillospirales	Acutalibacteraceae	Ruminococcus_E	Ruminococcus_E sp017481885
RGVC760	RGIG469	Illumina Sequencing	tRNA	Bacteria	Firmicutes_A	Clostridia	Oscillospirales	Butyricicoccaceae	RGIG1902	RGIG1902 sp017421885
RGVC760	RGIG7984	Illumina Sequencing	tRNA	Bacteria	Firmicutes_A	Clostridia	Oscillospirales	Oscillospiraceae	RGIG6969
RGVC760	RGIG8567	Illumina Sequencing	tRNA	Bacteria	Firmicutes_A	Clostridia	Oscillospirales	Oscillospiraceae	Lawsonibacter	Lawsonibacter sp017624915
RGVC760	RGIG9120	Illumina Sequencing	tRNA	Bacteria	Firmicutes_A	Clostridia	HGM11327	HGM11327	SIG351	SIG351 sp017935525
RGVC760	RUG10366	Rumen Superset	tRNA	Bacteria	Firmicutes_A	Clostridia	Oscillospirales	Oscillospiraceae	Limivicinus	Limivicinus sp900319935
RGVC760	RUG13434	Rumen Superset	tRNA	Bacteria	Firmicutes_A	Clostridia	Oscillospirales	Oscillospiraceae	Limivicinus	Limivicinus sp900319275
RGVC760	RUG13454	Rumen Superset	tRNA	Bacteria	Firmicutes_A	Clostridia	Oscillospirales	Ruminococcaceae	Ruminococcus	Ruminococcus sp002389995
RGVC760	RUG14822	Rumen Superset	tRNA	Bacteria	Firmicutes_A	Clostridia	Oscillospirales	Acutalibacteraceae	UBA1213	UBA1213 sp902802985
RGVC763	HUN_Ruminococcus_flavefaciens_MA2007	Rumen Superset	tRNA	Bacteria	Firmicutes_A	Clostridia	Oscillospirales	Ruminococcaceae	Ruminococcus	Ruminococcus flavefaciens_E
RGVC763	RGIG1757	Illumina Sequencing	tRNA	Bacteria	Firmicutes_A	Clostridia	Oscillospirales	Ruminococcaceae	UBA3818	UBA3818 sp017408855
RGVC763	RGIG2084	Illumina Sequencing	tRNA	Bacteria	Firmicutes_A	Clostridia	Oscillospirales	Oscillospiraceae	UBA738
RGVC763	RGIG4697	Illumina Sequencing	tRNA	Bacteria	Firmicutes_A	Clostridia	Oscillospirales	CAG-272	RGIG3925	RGIG3925 sp017481495
RGVC763	RGIG5550	Illumina Sequencing	tRNA	Bacteria	Firmicutes_A	Clostridia	Oscillospirales	CAG-272	UMGS1865	UMGS1865 sp017507905
RGVC763	RGIG8645	Illumina Sequencing	tRNA	Bacteria	Firmicutes_A	Clostridia	Oscillospirales	UBA644	RGIG995	RGIG995 sp017623475
RGVC763	RUG14407	Rumen Superset	tRNA	Bacteria	Firmicutes_A	Clostridia	Oscillospirales	Acutalibacteraceae	RUG420	RUG420 sp900317085
RGVC763	RUG14926	Rumen Superset	tRNA	Bacteria	Firmicutes_A	Clostridia	Oscillospirales	Ruminococcaceae	Ruminococcus	Ruminococcus flavefaciens_R
RGVC765	RGIG4203	Illumina Sequencing	tRNA	Bacteria	Firmicutes_A	Clostridia	Lachnospirales	Lachnospiraceae	SIG307	SIG307 sp017465475
RGVC765	RGIG4254	Illumina Sequencing	tRNA	Bacteria	Firmicutes_A	Clostridia	Lachnospirales	Lachnospiraceae	SIG307	SIG307 sp017463035
RGVC765	RGIG4675	Illumina Sequencing	tRNA	Bacteria	Firmicutes_A	Clostridia	Lachnospirales	Lachnospiraceae	SIG307	SIG307 sp017463035
RGVC765	RGIG5355	Illumina Sequencing	tRNA	Bacteria	Firmicutes_A	Clostridia	Lachnospirales	Lachnospiraceae	SIG307	SIG307 sp017503735
RGVC765	RGIG6352	Illumina Sequencing	tRNA	Bacteria	Firmicutes_A	Clostridia	Lachnospirales	Lachnospiraceae	Acetatifactor	Acetatifactor sp017513625
RGVC765	RUG11892	Rumen Superset	tRNA	Bacteria	Firmicutes_A	Clostridia	Lachnospirales	Lachnospiraceae	UBA2821	UBA2821 sp002351535
RGVC765	RUG13295	Rumen Superset	tRNA	Bacteria	Firmicutes_A	Clostridia	Lachnospirales	Lachnospiraceae	ISDg	ISDg sp902787715
RGVC765	RUG13465	Rumen Superset	tRNA	Bacteria	Firmicutes_A	Clostridia	Lachnospirales	Lachnospiraceae	ISDg	ISDg sp902787715
RGVC765	RUG13801	Rumen Superset	tRNA	Bacteria	Firmicutes_A	Clostridia	Lachnospirales	Lachnospiraceae	ISDg	ISDg sp902787715
RGVC765	RUG14833	Rumen Superset	tRNA	Bacteria	Firmicutes_A	Clostridia	Lachnospirales	Lachnospiraceae	UBA3766	UBA3766 sp902803015
RGVC767	RGIG9597	Illumina Sequencing	tRNA	Bacteria	Firmicutes_A	Clostridia	Oscillospirales	CAG-272	RGIG3925	RGIG3925 sp017628075
RGVC768	RGIG1767	Illumina Sequencing	tRNA	Bacteria	Firmicutes_A	Clostridia	Oscillospirales	Oscillospiraceae	Limivicinus	Limivicinus sp017398685
RGVC768	RUG13959	Rumen Superset	tRNA	Bacteria	Firmicutes_A	Clostridia	Oscillospirales	Oscillospiraceae	Limivicinus	Limivicinus sp902793285
RGVC768	RUG14738	Rumen Superset	tRNA	Bacteria	Firmicutes_A	Clostridia	Oscillospirales	Oscillospiraceae	Limivicinus	Limivicinus sp900320595
RGVC768	RUG14749	Rumen Superset	tRNA	Bacteria	Firmicutes_A	Clostridia	Oscillospirales	Oscillospiraceae	Limivicinus	Limivicinus sp900317375
RGVC770	RGIG4291	Illumina Sequencing	tRNA	Bacteria	Firmicutes_A	Clostridia	Oscillospirales	QAKW01	QAKW01	QAKW01 sp017464525
RGVC774	RGIG2502	Illumina Sequencing	tRNA	Bacteria	Verrucomicrobiota	Kiritimatiellae	RFP12	UBA1067	UBA1067	UBA1067 sp902799955
RGVC774	RGIG5077	Illumina Sequencing	tRNA	Bacteria	Verrucomicrobiota	Kiritimatiellae	RFP12	UBA1067	UBA1067
RGVC774	RUG13307	Rumen Superset	tRNA	Bacteria	Verrucomicrobiota	Kiritimatiellae	RFP12	UBA1067	UBA1067	UBA1067 sp002351765
RGVC774	RUG14500	Rumen Superset	tRNA	Bacteria	Verrucomicrobiota	Kiritimatiellae	RFP12	UBA1067	UBA1067	UBA1067 sp902776615
RGVC774	RUG14528	Rumen Superset	tRNA	Bacteria	Verrucomicrobiota	Kiritimatiellae	RFP12	UBA1067	UBA1067	UBA1067 sp902799955
RGVC774	RUG14537	Rumen Superset	tRNA	Bacteria	Verrucomicrobiota	Kiritimatiellae	RFP12	UBA1067	UBA1067	UBA1067 sp902800055
RGVC774	RUG14565	Rumen Superset	tRNA	Bacteria	Verrucomicrobiota	Kiritimatiellae	RFP12	UBA1067	RUG572	RUG572 sp902802945
RGVC774	RUG14632	Rumen Superset	tRNA	Bacteria	Verrucomicrobiota	Kiritimatiellae	RFP12	UBA1067	UBA1067	UBA1067 sp902801025
RGVC780	RGIG4618	Illumina Sequencing	tRNA	Bacteria	Firmicutes_A	Clostridia	Oscillospirales	Ruminococcaceae	SIG578
RGVC780	RGIG7263	Illumina Sequencing	tRNA	Bacteria	Firmicutes_A	Clostridia	UBA1381	UBA9506	UBA9506
RGVC780	RGIG7535	Illumina Sequencing	tRNA	Bacteria	Firmicutes_A	Clostridia	Oscillospirales	Ruminococcaceae	Ruminococcus	Ruminococcus flavefaciens_B
RGVC780	RGIG8575	Illumina Sequencing	tRNA	Bacteria	Firmicutes_A	Clostridia	Oscillospirales	Acutalibacteraceae	Fimenecus	Fimenecus sp017624735
RGVC780	RGIG8739	Illumina Sequencing	tRNA	Bacteria	Firmicutes_A	Clostridia	Oscillospirales	CAG-272	CAG-272	CAG-272 sp017621655
RGVC780	RGIG9062	Illumina Sequencing	tRNA	Bacteria	Firmicutes_A	Clostridia	Oscillospirales	Acutalibacteraceae	CAG-488	CAG-488 sp017936645
RGVC780	RGIG9403	Illumina Sequencing	tRNA	Bacteria	Firmicutes_A	Clostridia	Oscillospirales	Acutalibacteraceae	Fimenecus	Fimenecus sp017631955
RGVC780	RUG13646	Rumen Superset	tRNA	Bacteria	Firmicutes_A	Clostridia	Oscillospirales	Acutalibacteraceae	Eubacterium_R	Eubacterium_R sp902791235
RGVC784	RUG14075	Rumen Superset	tRNA	Bacteria	Bacteroidota	Bacteroidia	Bacteroidales	Bacteroidaceae	Prevotella	Prevotella sp900316475
RGVC784	SOL_BACT30	Rumen Superset	tRNA	Bacteria	Bacteroidota	Bacteroidia	Bacteroidales	Bacteroidaceae	UBA3839	UBA3839 sp900319385
RGVC784	SVA_102_bin76	Rumen Superset	tRNA	Bacteria	Bacteroidota	Bacteroidia	Bacteroidales	Bacteroidaceae	Prevotella
RGVC786	RGIG4139	Illumina Sequencing	tRNA	Bacteria	Firmicutes_A	Clostridia	Oscillospirales	Oscillospiraceae	Faecousia	Faecousia sp017466665
RGVC786	RGIG5295	Illumina Sequencing	tRNA	Bacteria	Firmicutes_A	Clostridia	Oscillospirales	Oscillospiraceae	Faecousia
RGVC786	RGIG7305	Illumina Sequencing	tRNA	Bacteria	Firmicutes_A	Clostridia	Oscillospirales	Oscillospiraceae	Faecousia	Faecousia sp017547505
RGVC786	RGIG8578	Illumina Sequencing	tRNA	Bacteria	Firmicutes_A	Clostridia	Oscillospirales	Oscillospiraceae	Faecousia	Faecousia sp017624715
RGVC786	RGIG8581	Illumina Sequencing	tRNA	Bacteria	Firmicutes_A	Clostridia	Oscillospirales	Oscillospiraceae	Faecousia	Faecousia sp017624645
RGVC786	RGIG8691	Illumina Sequencing	tRNA	Bacteria	Firmicutes_A	Clostridia	Oscillospirales	Oscillospiraceae	Faecousia
RGVC786	RGIG8933	Illumina Sequencing	tRNA	Bacteria	Firmicutes_A	Clostridia	Oscillospirales	Oscillospiraceae	Faecousia
RGVC786	RGIG9045	Illumina Sequencing	tRNA	Bacteria	Firmicutes_A	Clostridia	Oscillospirales	Oscillospiraceae	Faecousia	Faecousia sp017936985
RGVC786	RGIG9400	Illumina Sequencing	tRNA	Bacteria	Firmicutes_A	Clostridia	Oscillospirales	Oscillospiraceae	Faecousia	Faecousia sp017632035
RGVC786	RGIG9475	Illumina Sequencing	tRNA	Bacteria	Firmicutes_A	Clostridia	Oscillospirales	Oscillospiraceae	Faecousia	Faecousia sp017630495
RGVC786	RUG10824	Rumen Superset	tRNA	Bacteria	Firmicutes_A	Clostridia	Oscillospirales	Oscillospiraceae	Evtepia	Evtepia sp902781745
RGVC786	RUG14158	Rumen Superset	tRNA	Bacteria	Firmicutes_A	Clostridia	Oscillospirales	Oscillospiraceae	CAG-170	CAG-170 sp902796245
RGVC789	RGIG19	Illumina Sequencing	tRNA	Bacteria	Firmicutes_A	Clostridia	Oscillospirales	Acutalibacteraceae	RUG592	RUG592 sp017418905
RGVC789	RGIG2013	Illumina Sequencing	tRNA	Bacteria	Firmicutes_A	Clostridia	Oscillospirales	Acutalibacteraceae	UBA737	UBA737 sp017403065
RGVC789	RGIG3013	Illumina Sequencing	tRNA	Bacteria	Firmicutes_A	Clostridia	Oscillospirales	Acutalibacteraceae	RGIG3013	RGIG3013 sp017436815
RGVC789	RGIG8579	Illumina Sequencing	tRNA	Bacteria	Firmicutes_A	Clostridia	Oscillospirales	Acutalibacteraceae	UBA737	UBA737 sp017624675
RGVC789	RGIG9037	Illumina Sequencing	tRNA	Bacteria	Firmicutes_A	Clostridia	Oscillospirales	CAG-272	RGIG2000	RGIG2000 sp017937135
RGVC789	RUG14147	Rumen Superset	tRNA	Bacteria	Firmicutes_A	Clostridia	Oscillospirales	Acutalibacteraceae	UBA737	UBA737 sp902796165
RGVC790	RGIG2033	Illumina Sequencing	tRNA	Bacteria	Firmicutes_A	Clostridia	Oscillospirales	CAG-272	UMGS1865
RGVC790	RGIG3821	Illumina Sequencing	tRNA	Bacteria	Firmicutes_A	Clostridia	Oscillospirales	CAG-272	UMGS1865
RGVC790	RGIG9393	Illumina Sequencing	tRNA	Bacteria	Firmicutes_A	Clostridia	Oscillospirales	CAG-272	CAG-390	CAG-390 sp017632155
RGVC790	RGIG9444	Illumina Sequencing	tRNA	Bacteria	Firmicutes_A	Clostridia	Oscillospirales	CAG-272	HGM12713	HGM12713 sp017631085
RGVC790	RGIG9838	Illumina Sequencing	tRNA	Bacteria	Firmicutes_A	Clostridia	Oscillospirales	CAG-272	HGM12713
RGVC794	RGIG2248	Illumina Sequencing	tRNA	Bacteria	Firmicutes_A	Clostridia	Oscillospirales	Acutalibacteraceae	UMGS1491	UMGS1491 sp017406805
RGVC794	RUG11462	Rumen Superset	tRNA	Bacteria	Firmicutes_A	Clostridia	Oscillospirales	Acutalibacteraceae	RUG11462	RUG11462 sp902769255
RGVC794	RUG14735	Rumen Superset	tRNA	Bacteria	Firmicutes_A	Clostridia	Oscillospirales	Acutalibacteraceae	Ruminococcus_E	Ruminococcus_E sp900317315
RGVC794	RUG14822	Rumen Superset	tRNA	Bacteria	Firmicutes_A	Clostridia	Oscillospirales	Acutalibacteraceae	UBA1213	UBA1213 sp902802985
RGVC794	goat-flye.maxbin.002.contigs	HiFi Sequencing	tRNA	Bacteria	Firmicutes	Bacilli	Mycoplasmatales	Mycoplasmoidaceae	Malacoplasma_A	Malacoplasma_A sp902800015
RGVC796	RUG11696	Rumen Superset	tRNA	Bacteria	Firmicutes_A	Clostridia	Oscillospirales	Oscillospiraceae	RUG626	RUG626 sp900317385
RGVC797	RUG13585	Rumen Superset	tRNA	Bacteria	Firmicutes_A	Clostridia	Oscillospirales	Oscillospiraceae	Faecousia	Faecousia sp900315595
RGVC800	RGIG5504	Illumina Sequencing	tRNA	Bacteria	Firmicutes_A	Clostridia	Christensenellales	Borkfalkiaceae	SIG402
RGVC801	RGIG1832	Illumina Sequencing	tRNA	Bacteria	Firmicutes_A	Clostridia	Oscillospirales	Acutalibacteraceae	UBA6857	UBA6857 sp017397845
RGVC801	RGIG4597	Illumina Sequencing	tRNA	Bacteria	Firmicutes_A	Clostridia	Oscillospirales	Acutalibacteraceae	UBA6857	UBA6857 sp017473435
RGVC801	RGIG9120	Illumina Sequencing	tRNA	Bacteria	Firmicutes_A	Clostridia	HGM11327	HGM11327	SIG351	SIG351 sp017935525
RGVC801	RUG11663	Rumen Superset	tRNA	Bacteria	Firmicutes_A	Clostridia	Oscillospirales	Oscillospiraceae	RUG626	RUG626 sp900317385
RGVC801	RUG13155	Rumen Superset	tRNA	Bacteria	Firmicutes_A	Clostridia	Oscillospirales	Acutalibacteraceae	UBA6857	UBA6857 sp902786285
RGVC801	RUG13437	Rumen Superset	tRNA	Bacteria	Firmicutes_A	Clostridia	Oscillospirales	Acutalibacteraceae	CAG-488	CAG-488 sp902789095
RGVC801	RUG13570	Rumen Superset	tRNA	Bacteria	Firmicutes_A	Clostridia	Oscillospirales	Acutalibacteraceae	RUG420	RUG420 sp900317085
RGVC801	RUG14782	Rumen Superset	tRNA	Bacteria	Firmicutes_A	Clostridia	Oscillospirales	Acutalibacteraceae	Ruminococcus_E	Ruminococcus_E sp900317315
RGVC801	RUG14847	Rumen Superset	tRNA	Bacteria	Firmicutes_A	Clostridia	Oscillospirales	Acutalibacteraceae	CAG-177	CAG-177 sp902796295
RGVC801	RUG14874	Rumen Superset	tRNA	Bacteria	Firmicutes_A	Clostridia	Oscillospirales	Acutalibacteraceae	UBA1213	UBA1213 sp900319255
RGVC805	RGIG7740	Illumina Sequencing	tRNA	Bacteria	Verrucomicrobiota	Verrucomicrobiae	Verrucomicrobiales	Akkermansiaceae	Akkermansia	Akkermansia sp017555465
RGVC805	RGIG7758	Illumina Sequencing	tRNA	Bacteria	Verrucomicrobiota	Verrucomicrobiae	Verrucomicrobiales	Akkermansiaceae	Akkermansia	Akkermansia sp017549485
RGVC806	RGIG8924	Illumina Sequencing	tRNA	Bacteria	Firmicutes_A	Clostridia	Oscillospirales	Acutalibacteraceae	UBA1417
RGVC806	RUG13058	Rumen Superset	tRNA	Bacteria	Firmicutes_A	Clostridia	Oscillospirales	Acutalibacteraceae	UBA1213	UBA1213 sp900317395
RGVC808	RGIG4698	Illumina Sequencing	tRNA	Bacteria	Bacteroidota	Bacteroidia	Bacteroidales	UBA932	Cryptobacteroides	Cryptobacteroides sp015060395
RGVC808	RGIG7353	Illumina Sequencing	tRNA	Bacteria	Bacteroidota	Bacteroidia	Bacteroidales	UBA932	Cryptobacteroides	Cryptobacteroides sp017559545
RGVC808	RGIG7423	Illumina Sequencing	tRNA	Bacteria	Bacteroidota	Bacteroidia	Bacteroidales	UBA932	Cryptobacteroides
RGVC808	RGIG7459	Illumina Sequencing	tRNA	Bacteria	Bacteroidota	Bacteroidia	Bacteroidales	UBA932	Cryptobacteroides	Cryptobacteroides sp017549145
RGVC808	RGIG7714	Illumina Sequencing	tRNA	Bacteria	Bacteroidota	Bacteroidia	Bacteroidales	UBA932	Cryptobacteroides	Cryptobacteroides sp017555965
RGVC808	RGIG7743	Illumina Sequencing	tRNA	Bacteria	Bacteroidota	Bacteroidia	Bacteroidales	UBA932	Cryptobacteroides	Cryptobacteroides sp017555445
RGVC808	RGIG8485	Illumina Sequencing	tRNA	Bacteria	Bacteroidota	Bacteroidia	Bacteroidales	UBA932	Cryptobacteroides	Cryptobacteroides sp017626355
RGVC808	RGIG9383	Illumina Sequencing	tRNA	Bacteria	Bacteroidota	Bacteroidia	Bacteroidales	UBA932	Cryptobacteroides	Cryptobacteroides sp017560825
RGVC808	RGIG9439	Illumina Sequencing	tRNA	Bacteria	Bacteroidota	Bacteroidia	Bacteroidales	UBA932	Cryptobacteroides	Cryptobacteroides sp017631175
RGVC808	RGIG9463	Illumina Sequencing	tRNA	Bacteria	Bacteroidota	Bacteroidia	Bacteroidales	UBA932	Cryptobacteroides	Cryptobacteroides sp017560825
RGVC808	RGIG947	Illumina Sequencing	tRNA	Bacteria	Bacteroidota	Bacteroidia	Bacteroidales	UBA932	Cryptobacteroides
RGVC808	RGIG9749	Illumina Sequencing	tRNA	Bacteria	Bacteroidota	Bacteroidia	Bacteroidales	UBA932	RUG11257	RUG11257 sp017650285
RGVC808	RUG14675	Rumen Superset	tRNA	Bacteria	Bacteroidota	Bacteroidia	Bacteroidales	Bacteroidaceae	UBA4334	UBA4334 sp902801475
RGVC808	RUG14817	Rumen Superset	tRNA	Bacteria	Firmicutes_C	Negativicutes	Acidaminococcales	Acidaminococcaceae	Succiniclasticum	Succiniclasticum sp900315925
RGVC809	RGIG6515	Illumina Sequencing	tRNA	Bacteria	Firmicutes_A	Clostridia	Oscillospirales	Butyricicoccaceae	RGIG3513	RGIG3513 sp017408485
RGVC815	RGIG5343	Illumina Sequencing	tRNA	Bacteria	Firmicutes_A	Clostridia	UMGS1810	UMGS1810	RGIG1828	RGIG1828 sp017503945
RGVC815	RGIG5380	Illumina Sequencing	tRNA	Bacteria	Firmicutes_A	Clostridia	Monoglobales	Monoglobaceae	SIG440	SIG440 sp017503225
RGVC815	RGIG8748	Illumina Sequencing	tRNA	Bacteria	Firmicutes_A	Clostridia	UMGS1810	UMGS1810	RGIG8748	RGIG8748 sp017621495
RGVC815	RUG10801	Rumen Superset	tRNA	Bacteria	Firmicutes_A	Clostridia	Lachnospirales	Lachnospiraceae	Agathobacter	Agathobacter faecis
RGVC815	RUG13671	Rumen Superset	tRNA	Bacteria	Firmicutes_A	Clostridia	Monoglobales	Monoglobaceae	UMGS1820	UMGS1820 sp902791425
RGVC816	RGIG9847	Illumina Sequencing	tRNA	Bacteria	Bacteroidota	Bacteroidia	Bacteroidales	Bacteroidaceae	HGM04593	HGM04593 sp017647975
RGVC817	RUG14536	Rumen Superset	tRNA	Bacteria	Firmicutes	Bacilli	RFN20	CAG-826	UBA2450	UBA2450 sp902800025
RGVC819	RGIG1770	Illumina Sequencing	tRNA	Archaea	Halobacteriota	Methanomicrobia	Methanomicrobiales	Methanocorpusculaceae	Methanocorpusculum	Methanocorpusculum sp017399555
RGVC819	RGIG2143	Illumina Sequencing	tRNA	Archaea	Halobacteriota	Methanomicrobia	Methanomicrobiales	Methanocorpusculaceae	Methanocorpusculum	Methanocorpusculum sp017408885
RGVC819	RGIG7184	Illumina Sequencing	tRNA	Archaea	Halobacteriota	Methanomicrobia	Methanomicrobiales	Methanocorpusculaceae	Methanocorpusculum	Methanocorpusculum sp017387505
RGVC819	RGIG7475	Illumina Sequencing	tRNA	Bacteria	Bacteroidota	Bacteroidia	Bacteroidales	UBA932	Cryptobacteroides	Cryptobacteroides sp017546585
RGVC819	RGIG7657	Illumina Sequencing	tRNA	Archaea	Halobacteriota	Methanomicrobia	Methanomicrobiales	Methanocorpusculaceae	Methanocorpusculum	Methanocorpusculum sp017387505
RGVC819	RGIG7725	Illumina Sequencing	tRNA	Archaea	Halobacteriota	Methanomicrobia	Methanomicrobiales	Methanocorpusculaceae	Methanocorpusculum	Methanocorpusculum sp017387505
RGVC819	RGIG7729	Illumina Sequencing	tRNA	Archaea	Halobacteriota	Methanomicrobia	Methanomicrobiales	Methanocorpusculaceae	Methanocorpusculum	Methanocorpusculum sp017555685
RGVC819	RGIG8512	Illumina Sequencing	tRNA	Archaea	Halobacteriota	Methanomicrobia	Methanomicrobiales	Methanocorpusculaceae	Methanocorpusculum	Methanocorpusculum sp017622255
RGVC819	RGIG8550	Illumina Sequencing	tRNA	Archaea	Halobacteriota	Methanomicrobia	Methanomicrobiales	Methanocorpusculaceae	Methanocorpusculum	Methanocorpusculum sp017622255
RGVC819	RGIG8706	Illumina Sequencing	tRNA	Archaea	Halobacteriota	Methanomicrobia	Methanomicrobiales	Methanocorpusculaceae	Methanocorpusculum	Methanocorpusculum sp017622255
RGVC819	RGIG9061	Illumina Sequencing	tRNA	Archaea	Halobacteriota	Methanomicrobia	Methanomicrobiales	Methanocorpusculaceae	Methanocorpusculum	Methanocorpusculum sp017622255
RGVC821	HUN_Prevotella_sp_P6B4	Rumen Superset	tRNA	Bacteria	Bacteroidota	Bacteroidia	Bacteroidales	Bacteroidaceae	Prevotella	Prevotella sp000702825
RGVC821	RUG12556	Rumen Superset	tRNA	Bacteria	Bacteroidota	Bacteroidia	Bacteroidales	SZUA-534	RUG13583	RUG13583 sp902790595
RGVC821	RUG13960	Rumen Superset	tRNA	Bacteria	Bacteroidota	Bacteroidia	Bacteroidales	Bacteroidaceae	Prevotella	Prevotella sp900315775
RGVC821	SVA_104_bin36	Rumen Superset	tRNA	Bacteria	Bacteroidota	Bacteroidia	Bacteroidales	Bacteroidaceae	Prevotella
RGVC821	SVA_105_bin107	Rumen Superset	tRNA	Bacteria	Bacteroidota	Bacteroidia	Bacteroidales	Bacteroidaceae	Prevotella
RGVC821	SVA_105_bin38	Rumen Superset	tRNA	Bacteria	Bacteroidota	Bacteroidia	Bacteroidales	Bacteroidaceae	Prevotella
RGVC821	SVA_105_bin68	Rumen Superset	tRNA	Bacteria	Bacteroidota	Bacteroidia	Bacteroidales	Bacteroidaceae	UBA4372
RGVC821	SVA_106_bin57	Rumen Superset	tRNA	Bacteria	Bacteroidota	Bacteroidia	Bacteroidales	Bacteroidaceae	Prevotella
RGVC821	UBA4359	Rumen Superset	tRNA	Bacteria	Bacteroidota	Bacteroidia	Bacteroidales	Bacteroidaceae	UBA4334	UBA4334 sp002393555
RGVC823	RGIG938	Illumina Sequencing	tRNA	Bacteria	Firmicutes_A	Clostridia	Lachnospirales	Lachnospiraceae	Copromonas	Copromonas sp017380975
RGVC823	RUG11462	Rumen Superset	tRNA	Bacteria	Firmicutes_A	Clostridia	Oscillospirales	Acutalibacteraceae	RUG11462	RUG11462 sp902769255
RGVC823	RUG13672	Rumen Superset	tRNA	Bacteria	Firmicutes_A	Clostridia	Oscillospirales	Ruminococcaceae	Ruminococcus_C	Ruminococcus_C callidus
RGVC826	RGIG8642	Illumina Sequencing	tRNA	Bacteria	Bacteroidota	Bacteroidia	Bacteroidales	Rikenellaceae	Alistipes	Alistipes sp017623505
RGVC826	RGIG884	Illumina Sequencing	tRNA	Bacteria	Bacteroidota	Bacteroidia	Bacteroidales	Rikenellaceae	Alistipes	Alistipes sp017391185
RGVC826	RGIG9571	Illumina Sequencing	tRNA	Bacteria	Bacteroidota	Bacteroidia	Bacteroidales	Rikenellaceae	Alistipes	Alistipes sp017628595
RGVC826	RGIG9826	Illumina Sequencing	tRNA	Bacteria	Bacteroidota	Bacteroidia	Bacteroidales	Rikenellaceae	Alistipes	Alistipes sp017628595
RGVC826	RGIG9841	Illumina Sequencing	tRNA	Bacteria	Bacteroidota	Bacteroidia	Bacteroidales	Rikenellaceae	Alistipes	Alistipes sp900770635
RGVC826	RGIG9869	Illumina Sequencing	tRNA	Bacteria	Bacteroidota	Bacteroidia	Bacteroidales	Rikenellaceae	Alistipes	Alistipes sp017631275
RGVC826	RGIG9870	Illumina Sequencing	tRNA	Bacteria	Bacteroidota	Bacteroidia	Bacteroidales	Rikenellaceae	Alistipes	Alistipes sp017629035
RGVC828	RGIG8473	Illumina Sequencing	tRNA	Bacteria	Bacteroidota	Bacteroidia	Bacteroidales	UBA932	Cryptobacteroides	Cryptobacteroides sp017626555
RGVC828	RGIG8683	Illumina Sequencing	tRNA	Bacteria	Bacteroidota	Bacteroidia	Bacteroidales	UBA932	Cryptobacteroides	Cryptobacteroides sp017465225
RGVC828	goat-flye.maxbin.002.contigs	HiFi Sequencing	tRNA	Bacteria	Firmicutes	Bacilli	Mycoplasmatales	Mycoplasmoidaceae	Malacoplasma_A	Malacoplasma_A sp902800015
RGVC829	RGIG5428	Illumina Sequencing	tRNA	Bacteria	Firmicutes_A	Clostridia	Oscillospirales	Oscillospiraceae	Faecousia	Faecousia sp017502265
RGVC829	RGIG8933	Illumina Sequencing	tRNA	Bacteria	Firmicutes_A	Clostridia	Oscillospirales	Oscillospiraceae	Faecousia
RGVC830	RGIG3937	Illumina Sequencing	tRNA	Bacteria	Firmicutes_A	Clostridia	Oscillospirales	Acutalibacteraceae	HGM12789	HGM12789 sp015066215
RGVC830	RGIG7218	Illumina Sequencing	tRNA	Bacteria	Firmicutes_A	Clostridia	Oscillospirales	CAG-272	RGIG2161	RGIG2161 sp017556745
RGVC830	RUG10784	Rumen Superset	tRNA	Bacteria	Firmicutes_A	Clostridia	Oscillospirales	Acutalibacteraceae	RUG762	RUG762 sp902762615
RGVC830	RUG11894	Rumen Superset	tRNA	Bacteria	Firmicutes_A	Clostridia	Peptostreptococcales	Anaerovoracaceae	RUG11894	RUG11894 sp902773665
RGVC830	RUG13261	Rumen Superset	tRNA	Bacteria	Firmicutes_A	Clostridia	Oscillospirales	Acutalibacteraceae	UBA1425	UBA1425 sp902787275
RGVC830	RUG13570	Rumen Superset	tRNA	Bacteria	Firmicutes_A	Clostridia	Oscillospirales	Acutalibacteraceae	RUG420	RUG420 sp900317085
RGVC831	RGIG5438	Illumina Sequencing	tRNA	Bacteria	Bacteroidota	Bacteroidia	Bacteroidales	Rikenellaceae	Alistipes	Alistipes sp017502025
RGVC831	RGIG6160	Illumina Sequencing	tRNA	Bacteria	Bacteroidota	Bacteroidia	Bacteroidales	Rikenellaceae	Alistipes	Alistipes sp017442365
RGVC831	RGIG9529	Illumina Sequencing	tRNA	Bacteria	Bacteroidota	Bacteroidia	Bacteroidales	Rikenellaceae	UBA940
RGVC832	RGIG2066	Illumina Sequencing	tRNA	Bacteria	Firmicutes_A	Clostridia	Christensenellales	CAG-74	RGIG2066	RGIG2066 sp017410445
RGVC832	RGIG6256	Illumina Sequencing	tRNA	Bacteria	Firmicutes_A	Clostridia	Christensenellales	CAG-74	Limiplasma	Limiplasma sp017516765
RGVC832	RUG14416	Rumen Superset	tRNA	Bacteria	Firmicutes_A	Clostridia	Christensenellales	CAG-138	RUG472	RUG472 sp902798825
RGVC833	HUN_Methanobrevibacter_woesei_strain_DSM_11979	Rumen Superset	tRNA	Archaea	Methanobacteriota	Methanobacteria	Methanobacteriales	Methanobacteriaceae	Methanobrevibacter_A	Methanobrevibacter_A woesei
RGVC833	RUG13586	Rumen Superset	tRNA	Archaea	Methanobacteriota	Methanobacteria	Methanobacteriales	Methanobacteriaceae	Methanobrevibacter_B	Methanobrevibacter_B sp900314605
RGVC833	RUG13677	Rumen Superset	tRNA	Archaea	Methanobacteriota	Methanobacteria	Methanobacteriales	Methanobacteriaceae	Methanobrevibacter_A	Methanobrevibacter_A sp900314695
RGVC833	goat-flye.maxbin.037.contigs	HiFi Sequencing	tRNA	Bacteria	Patescibacteria	JAEDAM01	Absconditabacterales	X112	HOT-345
RGVC833	RUG14577	Rumen Superset	tRNA	Archaea	Methanobacteriota	Methanobacteria	Methanobacteriales	Methanobacteriaceae	Methanobrevibacter_A	Methanobrevibacter_A sp900316895
RGVC834	RGIG4920	Illumina Sequencing	tRNA	Archaea	Methanobacteriota	Methanobacteria	Methanobacteriales	Methanobacteriaceae	Methanobrevibacter_A	Methanobrevibacter_A sp017459665
RGVC834	RUG11303	Rumen Superset	tRNA	Archaea	Methanobacteriota	Methanobacteria	Methanobacteriales	Methanobacteriaceae	Methanobrevibacter_A	Methanobrevibacter_A sp900320515
RGVC834	RUG13586	Rumen Superset	tRNA	Archaea	Methanobacteriota	Methanobacteria	Methanobacteriales	Methanobacteriaceae	Methanobrevibacter_B	Methanobrevibacter_B sp900314605
RGVC834	goat-flye.maxbin.037.contigs	HiFi Sequencing	tRNA	Bacteria	Patescibacteria	JAEDAM01	Absconditabacterales	X112	HOT-345
RGVC834	RUG14577	Rumen Superset	tRNA	Archaea	Methanobacteriota	Methanobacteria	Methanobacteriales	Methanobacteriaceae	Methanobrevibacter_A	Methanobrevibacter_A sp900316895
RGVC837	RGIG8518	Illumina Sequencing	tRNA	Bacteria	Firmicutes_A	Clostridia	Oscillospirales	Acutalibacteraceae	CAG-488	CAG-488 sp017625835
RGVC838	RGIG1688	Illumina Sequencing	tRNA	Bacteria	Firmicutes	Bacilli	RF39	UBA660	CAG-877	CAG-877 sp017416535
RGVC838	RGIG2951	Illumina Sequencing	tRNA	Bacteria	Firmicutes	Bacilli	RF39	UBA660	RGIG2951	RGIG2951 sp017442305
RGVC838	RGIG8711	Illumina Sequencing	tRNA	Bacteria	Firmicutes	Bacilli	RF39	UBA660	CAG-877	CAG-877 sp017622175
RGVC838	RUG10081	Rumen Superset	tRNA	Bacteria	Firmicutes	Bacilli	RF39	UBA660	RUG343	RUG343 sp900317975
RGVC838	RUG13302	Rumen Superset	tRNA	Bacteria	Firmicutes	Bacilli	RF39	UBA660	RUG343	RUG343 sp900317975
RGVC838	RUG13444	Rumen Superset	tRNA	Bacteria	Firmicutes	Bacilli	RF39	UBA660	RUG343	RUG343 sp902789225
RGVC838	RUG13452	Rumen Superset	tRNA	Bacteria	Firmicutes	Bacilli	RF39	UBA660	UBA3789	UBA3789 sp900314225
RGVC838	RUG13669	Rumen Superset	tRNA	Bacteria	Firmicutes	Bacilli	RF39	UBA660	UBA3789	UBA3789 sp902776735
RGVC838	RUG13941	Rumen Superset	tRNA	Bacteria	Firmicutes	Bacilli	RF39	UBA660	UBA3789	UBA3789 sp902794075
RGVC838	RUG14253	Rumen Superset	tRNA	Bacteria	Firmicutes	Bacilli	RF39	UBA660	UBA3789	UBA3789 sp902797265
RGVC838	RUG14409	Rumen Superset	tRNA	Bacteria	Firmicutes	Bacilli	RF39	UBA660	UBA3789	UBA3789 sp902793315
RGVC838	RUG14702	Rumen Superset	tRNA	Bacteria	Firmicutes	Bacilli	RF39	UBA660	RUG12438	RUG12438 sp902801685
RGVC839	RGIG2049	Illumina Sequencing	tRNA	Bacteria	Firmicutes_A	Clostridia	UMGS1883	UMGS1883	UMGS1883	UMGS1883 sp017411435
RGVC840	RGIG4074	Illumina Sequencing	tRNA	Bacteria	Firmicutes_A	Clostridia	Christensenellales	Borkfalkiaceae	RGIG4074	RGIG4074 sp017462425
RGVC840	RUG12696	Rumen Superset	tRNA	Bacteria	Firmicutes_A	Clostridia	Oscillospirales	CAG-272	UBA1248	UBA1248 sp902762505
RGVC847	RGIG8518	Illumina Sequencing	tRNA	Bacteria	Firmicutes_A	Clostridia	Oscillospirales	Acutalibacteraceae	CAG-488	CAG-488 sp017625835
RGVC847	RGIG9001	Illumina Sequencing	tRNA	Bacteria	Firmicutes_A	Clostridia	Oscillospirales	Acutalibacteraceae	DTU089	DTU089 sp017937865
RGVC847	RGIG9062	Illumina Sequencing	tRNA	Bacteria	Firmicutes_A	Clostridia	Oscillospirales	Acutalibacteraceae	CAG-488	CAG-488 sp017936645
RGVC847	RUG11107	Rumen Superset	tRNA	Bacteria	Firmicutes_A	Clostridia	Oscillospirales	Acutalibacteraceae	Ruminococcus_E	Ruminococcus_E sp002350765
RGVC847	RUG11462	Rumen Superset	tRNA	Bacteria	Firmicutes_A	Clostridia	Oscillospirales	Acutalibacteraceae	RUG11462	RUG11462 sp902769255
RGVC847	RUG13540	Rumen Superset	tRNA	Bacteria	Firmicutes_A	Clostridia	Oscillospirales	Acutalibacteraceae	UBA6857	UBA6857 sp902786285
RGVC847	RUG14696	Rumen Superset	tRNA	Bacteria	Firmicutes_A	Clostridia	Oscillospirales	Acutalibacteraceae	Ruminococcus_E	Ruminococcus_E sp900319615
RGVC847	RUG14735	Rumen Superset	tRNA	Bacteria	Firmicutes_A	Clostridia	Oscillospirales	Acutalibacteraceae	Ruminococcus_E	Ruminococcus_E sp900317315
RGVC847	RUG14782	Rumen Superset	tRNA	Bacteria	Firmicutes_A	Clostridia	Oscillospirales	Acutalibacteraceae	Ruminococcus_E	Ruminococcus_E sp900317315
RGVC847	RUG14822	Rumen Superset	tRNA	Bacteria	Firmicutes_A	Clostridia	Oscillospirales	Acutalibacteraceae	UBA1213	UBA1213 sp902802985
RGVC851	RUG12287	Rumen Superset	tRNA	Bacteria	Firmicutes_A	Clostridia	Oscillospirales	Oscillospiraceae	Limivicinus
RGVC853	RGIG3051	Illumina Sequencing	tRNA	Bacteria	Firmicutes_A	Clostridia	Oscillospirales	Acutalibacteraceae	CAG-177	CAG-177 sp017403185
RGVC853	RGIG4695	Illumina Sequencing	tRNA	Bacteria	Firmicutes_A	Clostridia	Oscillospirales	Acutalibacteraceae	CAG-488	CAG-488 sp017481575
RGVC853	RGIG6395	Illumina Sequencing	tRNA	Bacteria	Firmicutes_A	Clostridia	Oscillospirales	Acutalibacteraceae	RUG806	RUG806 sp015065425
RGVC853	RGIG7203	Illumina Sequencing	tRNA	Bacteria	Firmicutes_A	Clostridia	Oscillospirales	Acutalibacteraceae	DTU089	DTU089 sp017550105
RGVC853	RGIG895	Illumina Sequencing	tRNA	Bacteria	Firmicutes_A	Clostridia	Oscillospirales	Acutalibacteraceae	UBA6857	UBA6857 sp017425745
RGVC853	RGIG9536	Illumina Sequencing	tRNA	Bacteria	Firmicutes_A	Clostridia	Oscillospirales	Acutalibacteraceae	UMGS172	UMGS172 sp017629275
RGVC853	RUG10098	Rumen Superset	tRNA	Bacteria	Firmicutes_A	Clostridia	Oscillospirales	Acutalibacteraceae	Eubacterium_R	Eubacterium_R sp900316345
RGVC853	RUG14020	Rumen Superset	tRNA	Bacteria	Firmicutes_A	Clostridia	Oscillospirales	Acutalibacteraceae	RUG714	RUG714 sp902794945
RGVC853	RUG14926	Rumen Superset	tRNA	Bacteria	Firmicutes_A	Clostridia	Oscillospirales	Ruminococcaceae	Ruminococcus	Ruminococcus flavefaciens_R
RGVC854	RUG11087	Rumen Superset	tRNA	Bacteria	Firmicutes_A	Clostridia	Christensenellales	CAG-138	RUG472	RUG472 sp900319345
RGVC855	RGIG1902	Illumina Sequencing	tRNA	Bacteria	Firmicutes_A	Clostridia	Oscillospirales	Butyricicoccaceae	RGIG1902	RGIG1902 sp017396925
RGVC855	RGIG2763	Illumina Sequencing	tRNA	Bacteria	Firmicutes_A	Clostridia	Oscillospirales	BX7	Galloscillospira_B	Galloscillospira_B sp017427525
RGVC855	RGIG292	Illumina Sequencing	tRNA	Bacteria	Firmicutes_A	Clostridia	Oscillospirales	Butyricicoccaceae	RGIG1902	RGIG1902 sp017421885
RGVC855	RGIG3143	Illumina Sequencing	tRNA	Bacteria	Firmicutes_A	Clostridia	Oscillospirales	Butyricicoccaceae	RGIG1902	RGIG1902 sp017407765
RGVC855	RGIG3624	Illumina Sequencing	tRNA	Bacteria	Firmicutes_A	Clostridia	Oscillospirales	Butyricicoccaceae	UBA4644	UBA4644 sp017455565
RGVC855	RGIG469	Illumina Sequencing	tRNA	Bacteria	Firmicutes_A	Clostridia	Oscillospirales	Butyricicoccaceae	RGIG1902	RGIG1902 sp017421885
RGVC855	RGIG7984	Illumina Sequencing	tRNA	Bacteria	Firmicutes_A	Clostridia	Oscillospirales	Oscillospiraceae	RGIG6969
RGVC855	RGIG8567	Illumina Sequencing	tRNA	Bacteria	Firmicutes_A	Clostridia	Oscillospirales	Oscillospiraceae	Lawsonibacter	Lawsonibacter sp017624915
RGVC855	RGIG9120	Illumina Sequencing	tRNA	Bacteria	Firmicutes_A	Clostridia	HGM11327	HGM11327	SIG351	SIG351 sp017935525
RGVC855	RUG13434	Rumen Superset	tRNA	Bacteria	Firmicutes_A	Clostridia	Oscillospirales	Oscillospiraceae	Limivicinus	Limivicinus sp900319275
RGVC855	RUG13454	Rumen Superset	tRNA	Bacteria	Firmicutes_A	Clostridia	Oscillospirales	Ruminococcaceae	Ruminococcus	Ruminococcus sp002389995
RGVC856	RGIG4353	Illumina Sequencing	tRNA	Bacteria	Firmicutes	Bacilli	RF39	UBA660	CAG-433	CAG-433 sp017459965
RGVC856	RUG10905	Rumen Superset	tRNA	Bacteria	Firmicutes	Bacilli	RF39	UBA660	CAG-302	CAG-302 sp002375205
RGVC856	RUG12335	Rumen Superset	tRNA	Bacteria	Firmicutes	Bacilli	RF39	UBA660	CAG-1000	CAG-1000 sp902778125
RGVC856	RUG13428	Rumen Superset	tRNA	Bacteria	Firmicutes	Bacilli	RF39	UBA660	RUG705	RUG705 sp902788975
RGVC856	RUG14253	Rumen Superset	tRNA	Bacteria	Firmicutes	Bacilli	RF39	UBA660	UBA3789	UBA3789 sp902797265
RGVC859	RGIG3884	Illumina Sequencing	tRNA	Bacteria	Firmicutes_A	Clostridia	Christensenellales	UBA1242	Onthoplasma
RGVC859	RGIG4663	Illumina Sequencing	tRNA	Bacteria	Firmicutes_A	Clostridia	Christensenellales	UBA1242	Onthoplasma
RGVC859	RGIG5497	Illumina Sequencing	tRNA	Bacteria	Firmicutes_A	Clostridia	Christensenellales	UBA1242	Onthoplasma
RGVC859	RGIG8962	Illumina Sequencing	tRNA	Bacteria	Firmicutes_A	Clostridia	Christensenellales	UBA1242	Caccovivens	Caccovivens sp017938505
RGVC861	RGIG2248	Illumina Sequencing	tRNA	Bacteria	Firmicutes_A	Clostridia	Oscillospirales	Acutalibacteraceae	UMGS1491	UMGS1491 sp017406805
RGVC862	RUG14822	Rumen Superset	tRNA	Bacteria	Firmicutes_A	Clostridia	Oscillospirales	Acutalibacteraceae	UBA1213	UBA1213 sp902802985
RGVC863	RGIG1758	Illumina Sequencing	tRNA	Bacteria	Verrucomicrobiota	Verrucomicrobiae	Verrucomicrobiales	Akkermansiaceae	Akkermansia	Akkermansia sp017398765
RGVC863	RGIG1847	Illumina Sequencing	tRNA	Bacteria	Verrucomicrobiota	Verrucomicrobiae	Verrucomicrobiales	Akkermansiaceae	Akkermansia	Akkermansia sp015061985
RGVC863	RGIG3086	Illumina Sequencing	CRISPR	Bacteria	Verrucomicrobiota	Verrucomicrobiae	Verrucomicrobiales	Akkermansiaceae	Akkermansia	Akkermansia sp017435365
RGVC863	RGIG7740	Illumina Sequencing	tRNA	Bacteria	Verrucomicrobiota	Verrucomicrobiae	Verrucomicrobiales	Akkermansiaceae	Akkermansia	Akkermansia sp017555465
RGVC863	RGIG7758	Illumina Sequencing	tRNA	Bacteria	Verrucomicrobiota	Verrucomicrobiae	Verrucomicrobiales	Akkermansiaceae	Akkermansia	Akkermansia sp017549485
RGVC863	RGIG9032	Illumina Sequencing	tRNA	Bacteria	Verrucomicrobiota	Verrucomicrobiae	Verrucomicrobiales	Akkermansiaceae	Akkermansia	Akkermansia sp017937215
RGVC864	RGIG9441	Illumina Sequencing	tRNA	Bacteria	Firmicutes_A	Clostridia	Oscillospirales	Oscillospiraceae	Faecousia	Faecousia sp017631155
RGVC866	RGIG7429	Illumina Sequencing	tRNA	Bacteria	Firmicutes_A	Clostridia	Oscillospirales	Acutalibacteraceae	UBA737	UBA737 sp017549565
RGVC866	RGIG859	Illumina Sequencing	tRNA	Bacteria	Firmicutes_A	Clostridia	Oscillospirales	Acutalibacteraceae	UBA737	UBA737 sp017390725
RGVC866	RUG14926	Rumen Superset	tRNA	Bacteria	Firmicutes_A	Clostridia	Oscillospirales	Ruminococcaceae	Ruminococcus	Ruminococcus flavefaciens_R
RGVC867	RGIG1767	Illumina Sequencing	tRNA	Bacteria	Firmicutes_A	Clostridia	Oscillospirales	Oscillospiraceae	Limivicinus	Limivicinus sp017398685
RGVC867	RUG14042	Rumen Superset	tRNA	Bacteria	Firmicutes_A	Clostridia	Oscillospirales	Oscillospiraceae	Limivicinus
RGVC867	RUG14543	Rumen Superset	tRNA	Bacteria	Firmicutes_A	Clostridia	Oscillospirales	Oscillospiraceae	Limivicinus	Limivicinus sp900319635
RGVC867	RUG14738	Rumen Superset	tRNA	Bacteria	Firmicutes_A	Clostridia	Oscillospirales	Oscillospiraceae	Limivicinus	Limivicinus sp900320595
RGVC867	RUG14749	Rumen Superset	tRNA	Bacteria	Firmicutes_A	Clostridia	Oscillospirales	Oscillospiraceae	Limivicinus	Limivicinus sp900317375
RGVC870	RGIG5797	Illumina Sequencing	tRNA	Bacteria	Firmicutes_A	Clostridia	Christensenellales	CAG-138	UBA3792	UBA3792 sp017514685
RGVC870	RUG11401	Rumen Superset	tRNA	Bacteria	Firmicutes_A	Clostridia	Christensenellales	CAG-138	UBA3792	UBA3792 sp902768795
RGVC871	RGIG1832	Illumina Sequencing	tRNA	Bacteria	Firmicutes_A	Clostridia	Oscillospirales	Acutalibacteraceae	UBA6857	UBA6857 sp017397845
RGVC871	RGIG1961	Illumina Sequencing	tRNA	Bacteria	Firmicutes_A	Clostridia	Oscillospirales	Butyricicoccaceae	RGIG1902	RGIG1902 sp017407765
RGVC871	RGIG5392	Illumina Sequencing	tRNA	Bacteria	Firmicutes_A	Clostridia	Oscillospirales	Butyricicoccaceae	RGIG3513	RGIG3513 sp017408485
RGVC871	RGIG8048	Illumina Sequencing	tRNA	Bacteria	Firmicutes_A	Clostridia	Oscillospirales	Oscillospiraceae	RGIG8048	RGIG8048 sp017619535
RGVC871	RUG10225	Rumen Superset	tRNA	Bacteria	Firmicutes_A	Clostridia	Oscillospirales	Oscillospiraceae	CAG-103	CAG-103 sp900316745
RGVC871	RUG11276	Rumen Superset	tRNA	Bacteria	Firmicutes_A	Clostridia	Oscillospirales	Oscillospiraceae	RUG626	RUG626 sp900317385
RGVC871	RUG13887	Rumen Superset	tRNA	Bacteria	Firmicutes_A	Clostridia	Oscillospirales	Acutalibacteraceae	Fimenecus	Fimenecus sp900315985
RGVC871	RUG14749	Rumen Superset	tRNA	Bacteria	Firmicutes_A	Clostridia	Oscillospirales	Oscillospiraceae	Limivicinus	Limivicinus sp900317375
RGVC871	RUG14754	Rumen Superset	tRNA	Bacteria	Firmicutes_A	Clostridia	Oscillospirales	Oscillospiraceae	Limivicinus	Limivicinus sp902802215
RGVC873	RGIG8458	Illumina Sequencing	tRNA	Bacteria	Firmicutes_A	Clostridia	Peptostreptococcales	Anaerovoracaceae	RUG11894	RUG11894 sp017626845
RGVC873	RGIG8643	Illumina Sequencing	tRNA	Bacteria	Firmicutes_A	Clostridia	Christensenellales	CAG-552	RUG12826	RUG12826 sp017623455
RGVC875	RGIG8623	Illumina Sequencing	tRNA	Bacteria	Bacteroidota	Bacteroidia	Bacteroidales	Bacteroidaceae	Phocaeicola	Phocaeicola sp017467385
RGVC875	RGIG8931	Illumina Sequencing	tRNA	Bacteria	Bacteroidota	Bacteroidia	Bacteroidales	Bacteroidaceae	Phocaeicola	Phocaeicola sp017420875
RGVC875	RGIG8945	Illumina Sequencing	tRNA	Bacteria	Bacteroidota	Bacteroidia	Bacteroidales	Bacteroidaceae	Phocaeicola	Phocaeicola sp017472925
RGVC875	RGIG9847	Illumina Sequencing	tRNA	Bacteria	Bacteroidota	Bacteroidia	Bacteroidales	Bacteroidaceae	HGM04593	HGM04593 sp017647975
RGVC877	RGIG417	Illumina Sequencing	tRNA	Bacteria	Bacteroidota	Bacteroidia	Bacteroidales	Rikenellaceae	Alistipes	Alistipes sp017938765
RGVC877	RGIG4215	Illumina Sequencing	tRNA	Bacteria	Bacteroidota	Bacteroidia	Bacteroidales	Rikenellaceae	Alistipes	Alistipes sp015059805
RGVC877	RGIG5308	Illumina Sequencing	tRNA	Bacteria	Bacteroidota	Bacteroidia	Bacteroidales	Rikenellaceae	UBA940	UBA940 sp015060105
RGVC877	RGIG7341	Illumina Sequencing	tRNA	Bacteria	Bacteroidota	Bacteroidia	Bacteroidales	Rikenellaceae	Alistipes	Alistipes sp017559685
RGVC877	RGIG7425	Illumina Sequencing	tRNA	Bacteria	Bacteroidota	Bacteroidia	Bacteroidales	Rikenellaceae	Alistipes
RGVC877	RGIG9008	Illumina Sequencing	tRNA	Bacteria	Bacteroidota	Bacteroidia	Bacteroidales	Rikenellaceae	Alistipes	Alistipes sp017442365
RGVC877	RGIG9034	Illumina Sequencing	tRNA	Bacteria	Bacteroidota	Bacteroidia	Bacteroidales	Rikenellaceae	Alistipes	Alistipes sp015059805
RGVC877	RGIG9153	Illumina Sequencing	tRNA	Bacteria	Bacteroidota	Bacteroidia	Bacteroidales	Muribaculaceae	Paramuribaculum	Paramuribaculum sp910587185
RGVC877	RGIG940	Illumina Sequencing	tRNA	Bacteria	Bacteroidota	Bacteroidia	Bacteroidales	Rikenellaceae	Alistipes
RGVC877	RGIG9488	Illumina Sequencing	tRNA	Bacteria	Bacteroidota	Bacteroidia	Bacteroidales	Rikenellaceae	Alistipes	Alistipes sp017630245
RGVC877	RGIG9767	Illumina Sequencing	tRNA	Bacteria	Bacteroidota	Bacteroidia	Bacteroidales	SZUA-534	RUG13583	RUG13583 sp017557605
RGVC877	RGIG9841	Illumina Sequencing	tRNA	Bacteria	Bacteroidota	Bacteroidia	Bacteroidales	Rikenellaceae	Alistipes	Alistipes sp900770635
RGVC877	RUG14817	Rumen Superset	tRNA	Bacteria	Firmicutes_C	Negativicutes	Acidaminococcales	Acidaminococcaceae	Succiniclasticum	Succiniclasticum sp900315925
RGVC877	UBA3709	Rumen Superset	tRNA	Bacteria	Bacteroidota	Bacteroidia	Bacteroidales	UBA932	Egerieousia	Egerieousia sp002372015
RGVC878	RGIG7172	Illumina Sequencing	tRNA	Bacteria	Firmicutes_A	Clostridia	Oscillospirales	Acutalibacteraceae	UBA1227	UBA1227 sp017538005
RGVC878	RGIG8923	Illumina Sequencing	tRNA	Bacteria	Firmicutes_A	Clostridia	Oscillospirales	Acutalibacteraceae
RGVC878	RUG11894	Rumen Superset	tRNA	Bacteria	Firmicutes_A	Clostridia	Peptostreptococcales	Anaerovoracaceae	RUG11894	RUG11894 sp902773665
RGVC878	RUG11941	Rumen Superset	tRNA	Bacteria	Firmicutes_A	Clostridia	Oscillospirales	Acutalibacteraceae	RGIG2774	RGIG2774 sp902774165
RGVC878	RUG13887	Rumen Superset	tRNA	Bacteria	Firmicutes_A	Clostridia	Oscillospirales	Acutalibacteraceae	Fimenecus	Fimenecus sp900315985
RGVC879	RGIG527	Illumina Sequencing	tRNA	Bacteria	Firmicutes_A	Clostridia	Oscillospirales	RGIG577	RGIG577	RGIG577 sp017419325
RGVC879	RGIG975	Illumina Sequencing	tRNA	Bacteria	Firmicutes_A	Clostridia	Oscillospirales	Acutalibacteraceae	UBA737	UBA737 sp017390725
RGVC879	RUG14020	Rumen Superset	tRNA	Bacteria	Firmicutes_A	Clostridia	Oscillospirales	Acutalibacteraceae	RUG714	RUG714 sp902794945
RGVC879	RUG14696	Rumen Superset	tRNA	Bacteria	Firmicutes_A	Clostridia	Oscillospirales	Acutalibacteraceae	Ruminococcus_E	Ruminococcus_E sp900319615
RGVC879	RUG14768	Rumen Superset	tRNA	Bacteria	Firmicutes_A	Clostridia	Oscillospirales	Acutalibacteraceae	UBA737	UBA737 sp902802375
RGVC880	RGIG3479	Illumina Sequencing	tRNA	Bacteria	Firmicutes_A	Clostridia	Oscillospirales	Oscillospiraceae	RGIG3566	RGIG3566 sp017445385
RGVC880	RGIG9086	Illumina Sequencing	tRNA	Bacteria	Firmicutes_A	Clostridia	Oscillospirales	Oscillospiraceae	Faecousia	Faecousia sp017936205
RGVC881	RGIG8578	Illumina Sequencing	tRNA	Bacteria	Firmicutes_A	Clostridia	Oscillospirales	Oscillospiraceae	Faecousia	Faecousia sp017624715
RGVC881	RUG14158	Rumen Superset	tRNA	Bacteria	Firmicutes_A	Clostridia	Oscillospirales	Oscillospiraceae	CAG-170	CAG-170 sp902796245
RGVC882	RGIG5585	Illumina Sequencing	tRNA	Bacteria	Firmicutes_A	Clostridia	Oscillospirales	CAG-272	SIG693	SIG693 sp017507145
RGVC885	RGIG8722	Illumina Sequencing	tRNA	Bacteria	Firmicutes_A	Clostridia	Christensenellales	Borkfalkiaceae	UBA1259	UBA1259 sp017621955
RGVC888	RGIG2108	Illumina Sequencing	tRNA	Bacteria	Firmicutes_A	Clostridia	Lachnospirales	Lachnospiraceae	Faecalimonas
RGVC888	RGIG2150	Illumina Sequencing	tRNA	Bacteria	Firmicutes_A	Clostridia	Oscillospirales	Oscillospiraceae	Faecousia	Faecousia sp017408725
RGVC888	RGIG381	Illumina Sequencing	tRNA	Bacteria	Firmicutes_A	Clostridia	Oscillospirales	Oscillospiraceae	Faecousia	Faecousia sp017380435
RGVC888	RGIG3889	Illumina Sequencing	tRNA	Bacteria	Firmicutes_A	Clostridia	Oscillospirales	Oscillospiraceae	Faecousia	Faecousia sp017456105
RGVC888	RGIG3985	Illumina Sequencing	tRNA	Bacteria	Firmicutes_A	Clostridia	Oscillospirales	Oscillospiraceae	Faecousia
RGVC888	RGIG4204	Illumina Sequencing	tRNA	Bacteria	Firmicutes_A	Clostridia	Oscillospirales	Oscillospiraceae	Faecousia
RGVC888	RGIG5401	Illumina Sequencing	tRNA	Bacteria	Firmicutes_A	Clostridia	Oscillospirales	Oscillospiraceae	RGIG5472
RGVC888	RGIG7498	Illumina Sequencing	tRNA	Bacteria	Firmicutes_A	Clostridia	Oscillospirales	Oscillospiraceae	Faecousia
RGVC888	RGIG8691	Illumina Sequencing	tRNA	Bacteria	Firmicutes_A	Clostridia	Oscillospirales	Oscillospiraceae	Faecousia
RGVC888	RUG13751	Rumen Superset	tRNA	Bacteria	Firmicutes_A	Clostridia	Oscillospirales	Oscillospiraceae	Faecousia	Faecousia sp900316335
RGVC888	RUG14158	Rumen Superset	tRNA	Bacteria	Firmicutes_A	Clostridia	Oscillospirales	Oscillospiraceae	CAG-170	CAG-170 sp902796245
RGVC889	RGIG6289	Illumina Sequencing	tRNA	Bacteria	Firmicutes_A	Clostridia	Oscillospirales	Oscillospiraceae	Faecousia	Faecousia sp017521485
RGVC890	RGIG2233	Illumina Sequencing	tRNA	Bacteria	Patescibacteria	Saccharimonadia	Saccharimonadales	Nanosyncoccaceae	Nanosyncoccus	Nanosyncoccus sp017404685
RGVC890	RGIG9907	Illumina Sequencing	tRNA	Bacteria	Firmicutes_A	Clostridia	Monoglobales	Firm-18	RGIG1864	RGIG1864 sp017646825
RGVC892	RGIG4189	Illumina Sequencing	tRNA	Bacteria	Firmicutes_A	Clostridia	Oscillospirales	Oscillospiraceae	Faecousia
RGVC893	RGIG2847	Illumina Sequencing	tRNA	Bacteria	Firmicutes_A	Clostridia	Peptostreptococcales	Anaerovoracaceae	Copromorpha	Copromorpha sp017438285
RGVC893	RUG10682	Rumen Superset	tRNA	Bacteria	Firmicutes_A	Clostridia	Lachnospirales	Lachnospiraceae	UBA6987	UBA6987 sp902761665
RGVC893	RUG12370	Rumen Superset	tRNA	Bacteria	Firmicutes_A	Clostridia	Lachnospirales	Lachnospiraceae	UBA1712	UBA1712 sp902779505
RGVC893	RUG14201	Rumen Superset	tRNA	Bacteria	Firmicutes_A	Clostridia	Lachnospirales	Lachnospiraceae	Butyribacter	Butyribacter sp000436755
RGVC896	RGIG4043	Illumina Sequencing	tRNA	Bacteria	Firmicutes_A	Clostridia	Lachnospirales	Lachnospiraceae	SIG307	SIG307 sp017463035
RGVC896	RGIG4601	Illumina Sequencing	tRNA	Bacteria	Firmicutes_A	Clostridia	Lachnospirales	Lachnospiraceae	SIG299
RGVC896	RGIG4645	Illumina Sequencing	tRNA	Bacteria	Firmicutes_A	Clostridia	Lachnospirales	Lachnospiraceae	UBA3766	UBA3766 sp017473115
RGVC896	RGIG6352	Illumina Sequencing	tRNA	Bacteria	Firmicutes_A	Clostridia	Lachnospirales	Lachnospiraceae	Acetatifactor	Acetatifactor sp017513625
RGVC896	RGIG7065	Illumina Sequencing	tRNA	Bacteria	Firmicutes_A	Clostridia	Lachnospirales	CAG-274	RGIG4310	RGIG4310 sp017543265
RGVC896	RGIG7215	Illumina Sequencing	tRNA	Bacteria	Firmicutes_A	Clostridia	Lachnospirales	Lachnospiraceae	SIG307	SIG307 sp017556805
RGVC896	RUG14833	Rumen Superset	tRNA	Bacteria	Firmicutes_A	Clostridia	Lachnospirales	Lachnospiraceae	UBA3766	UBA3766 sp902803015
RGVC896	SOL_BUTY22	Rumen Superset	tRNA	Bacteria	Firmicutes_A	Clostridia	Lachnospirales	Lachnospiraceae	RGIG3040
RGVC909	RGIG1848	Illumina Sequencing	tRNA	Bacteria	Firmicutes_A	Clostridia	TANB77	CAG-508	CAG-452	CAG-452 sp017397545
RGVC909	RGIG5845	Illumina Sequencing	tRNA	Bacteria	Firmicutes_A	Clostridia	TANB77	CAG-508	CAG-269
RGVC909	RGIG6613	Illumina Sequencing	tRNA	Bacteria	Firmicutes_A	Clostridia	TANB77	CAG-508	CAG-492	CAG-492 sp017528375
RGVC909	RGIG8051	Illumina Sequencing	tRNA	Bacteria	Firmicutes_A	Clostridia	TANB77	CAG-508	CAG-452
RGVC909	RGIG8482	Illumina Sequencing	tRNA	Bacteria	Firmicutes_A	Clostridia	TANB77	CAG-508	RGIG8482	RGIG8482 sp017626365
RGVC909	RGIG9048	Illumina Sequencing	tRNA	Bacteria	Firmicutes_A	Clostridia	TANB77	CAG-508	UMGS1994	UMGS1994 sp017936925
RGVC910	RGIG7236	Illumina Sequencing	tRNA	Bacteria	Firmicutes_A	Clostridia	Lachnospirales	Lachnospiraceae	HGM12587
RGVC912	RGIG4111	Illumina Sequencing	tRNA	Bacteria	Firmicutes_A	Clostridia	Christensenellales	Borkfalkiaceae	Scatosoma	Scatosoma sp017467265
RGVC912	RGIG5268	Illumina Sequencing	tRNA	Bacteria	Firmicutes_A	Clostridia	Christensenellales	Borkfalkiaceae	Scatosoma	Scatosoma sp017505465
RGVC912	RGIG8495	Illumina Sequencing	tRNA	Bacteria	Firmicutes_A	Clostridia	Christensenellales	Borkfalkiaceae	Scatosoma	Scatosoma sp017626135
RGVC912	RUG14019	Rumen Superset	tRNA	Bacteria	Firmicutes_A	Clostridia	Oscillospirales	Oscillospiraceae	Evtepia	Evtepia sp902781745
RGVC912	UBA7597	Rumen Superset	tRNA	Bacteria	Firmicutes_A	Clostridia	Christensenellales	Borkfalkiaceae	UBA7597	UBA7597 sp002474405
RGVC913	RGIG5410	Illumina Sequencing	tRNA	Bacteria	Firmicutes_A	Clostridia	Oscillospirales	Ruminococcaceae	RGIG3102	RGIG3102 sp017436765
RGVC913	RGIG8625	Illumina Sequencing	tRNA	Bacteria	Firmicutes_A	Clostridia	Oscillospirales	Ruminococcaceae	RGIG3102	RGIG3102 sp018109965
RGVC915	RGIG5809	Illumina Sequencing	tRNA	Bacteria	Firmicutes_A	Clostridia	Peptostreptococcales	Anaerovoracaceae	RUG754	RUG754 sp902778565
RGVC915	RUG11214	Rumen Superset	tRNA	Bacteria	Firmicutes_A	Clostridia	Peptostreptococcales	Anaerovoracaceae	Eubacterium_B	Eubacterium_B sp902766915
RGVC915	RUG13979	Rumen Superset	tRNA	Bacteria	Firmicutes_A	Clostridia	Peptostreptococcales	Anaerovoracaceae	Hornefia	Hornefia butyriciproducens
RGVC917	RUG11582	Rumen Superset	tRNA	Bacteria	Bacteroidota	Bacteroidia	Bacteroidales	Bacteroidaceae	Prevotella	Prevotella sp900315775
RGVC917	RUG12556	Rumen Superset	tRNA	Bacteria	Bacteroidota	Bacteroidia	Bacteroidales	SZUA-534	RUG13583	RUG13583 sp902790595
RGVC917	RUG12978	Rumen Superset	tRNA	Bacteria	Bacteroidota	Bacteroidia	Bacteroidales	Bacteroidaceae	Prevotella	Prevotella sp902764705
RGVC917	RUG14812	Rumen Superset	tRNA	Bacteria	Bacteroidota	Bacteroidia	Bacteroidales	Bacteroidaceae	Prevotella	Prevotella sp900316645
RGVC917	SOL_PREV32	Rumen Superset	tRNA	Bacteria	Bacteroidota	Bacteroidia	Bacteroidales	Bacteroidaceae	Prevotella
RGVC917	SVA_105_bin107	Rumen Superset	tRNA	Bacteria	Bacteroidota	Bacteroidia	Bacteroidales	Bacteroidaceae	Prevotella
RGVC917	UBA2448	Rumen Superset	tRNA	Bacteria	Bacteroidota	Bacteroidia	Bacteroidales	Bacteroidaceae	UBA4334	UBA4334 sp002342585
RGVC921	RGIG3096	Illumina Sequencing	tRNA	Bacteria	Firmicutes_A	Clostridia	Christensenellales	CAG-138	RGIG3096	RGIG3096 sp017435185
RGVC921	RGIG4189	Illumina Sequencing	tRNA	Bacteria	Firmicutes_A	Clostridia	Oscillospirales	Oscillospiraceae	Faecousia
RGVC921	RGIG6247	Illumina Sequencing	tRNA	Bacteria	Firmicutes_A	Clostridia	Oscillospirales	Oscillospiraceae	Faecousia	Faecousia sp017516785
RGVC921	RGIG7458	Illumina Sequencing	tRNA	Bacteria	Firmicutes_A	Clostridia	Oscillospirales	Oscillospiraceae	Faecousia	Faecousia sp017549125
RGVC921	RGIG9045	Illumina Sequencing	tRNA	Bacteria	Firmicutes_A	Clostridia	Oscillospirales	Oscillospiraceae	Faecousia	Faecousia sp017936985
RGVC921	RGIG9441	Illumina Sequencing	tRNA	Bacteria	Firmicutes_A	Clostridia	Oscillospirales	Oscillospiraceae	Faecousia	Faecousia sp017631155
RGVC921	RUG14042	Rumen Superset	tRNA	Bacteria	Firmicutes_A	Clostridia	Oscillospirales	Oscillospiraceae	Limivicinus
RGVC922	RGIG4664	Illumina Sequencing	tRNA	Bacteria	Firmicutes_A	Clostridia	Oscillospirales	Ruminococcaceae	Ruminiclostridium_E	Ruminiclostridium_E sp017472865
RGVC922	RGIG8615	Illumina Sequencing	tRNA	Bacteria	Firmicutes_A	Clostridia	Oscillospirales	Ruminococcaceae	Ruminiclostridium_E	Ruminiclostridium_E sp017624025
RGVC922	RUG13454	Rumen Superset	tRNA	Bacteria	Firmicutes_A	Clostridia	Oscillospirales	Ruminococcaceae	Ruminococcus	Ruminococcus sp002389995
RGVC924	RGIG7435	Illumina Sequencing	tRNA	Archaea	Methanobacteriota	Methanobacteria	Methanobacteriales	Methanobacteriaceae	Methanobrevibacter
RGVC925	HUN_Desulfovibrio_legallii_strain_KHC7	Rumen Superset	tRNA	Bacteria	Desulfobacterota_I	Desulfovibrionia	Desulfovibrionales	Desulfovibrionaceae	Desulfovibrio	Desulfovibrio legallii_A
RGVC925	RGIG1737	Illumina Sequencing	tRNA	Bacteria	Desulfobacterota_I	Desulfovibrionia	Desulfovibrionales	Desulfovibrionaceae	Desulfovibrio	Desulfovibrio sp017415765
RGVC925	RGIG8353	Illumina Sequencing	tRNA	Bacteria	Desulfobacterota_I	Desulfovibrionia	Desulfovibrionales	Desulfovibrionaceae	Mailhella
RGVC925	RGIG8354	Illumina Sequencing	tRNA	Bacteria	Desulfobacterota_I	Desulfovibrionia	Desulfovibrionales	Desulfovibrionaceae	Desulfovibrio
RGVC927	RUG12606	Rumen Superset	tRNA	Bacteria	Firmicutes_A	Clostridia	Christensenellales	CAG-74	GCA-900199385	GCA-900199385 sp900320755
RGVC927	RUG14340	Rumen Superset	tRNA	Bacteria	Firmicutes_A	Clostridia	Christensenellales	CAG-74	UBA2862	UBA2862 sp902798105
RGVC930	RGIG7928	Illumina Sequencing	tRNA	Bacteria	Firmicutes_A	Clostridia	Oscillospirales	Acutalibacteraceae	CAG-177	CAG-177 sp017550895
RGVC931	RGIG1694	Illumina Sequencing	tRNA	Bacteria	Firmicutes_A	Clostridia	Lachnospirales	Lachnospiraceae	RUG11237	RUG11237 sp017399445
RGVC931	RGIG3830	Illumina Sequencing	tRNA	Bacteria	Firmicutes_A	Clostridia	Oscillospirales	Oscillospiraceae	Faecousia	Faecousia sp017457285
RGVC931	RGIG9881	Illumina Sequencing	tRNA	Bacteria	Firmicutes_A	Clostridia	Oscillospirales	Oscillospiraceae	Faecousia
RGVC931	RUG13585	Rumen Superset	tRNA	Bacteria	Firmicutes_A	Clostridia	Oscillospirales	Oscillospiraceae	Faecousia	Faecousia sp900315595
RGVC936	RGIG7407	Illumina Sequencing	tRNA	Bacteria	Firmicutes_A	Clostridia	Lachnospirales	Lachnospiraceae	Choladocola	Choladocola sp017558865
RGVC936	RGIG8776	Illumina Sequencing	tRNA	Bacteria	Firmicutes_A	Clostridia	Lachnospirales	Lachnospiraceae	Acetatifactor	Acetatifactor sp017620975
RGVC936	RGIG887	Illumina Sequencing	tRNA	Bacteria	Firmicutes_A	Clostridia	Oscillospirales	CAG-272	CAG-448
RGVC936	RGIG9030	Illumina Sequencing	tRNA	Bacteria	Firmicutes_A	Clostridia	Lachnospirales	Lachnospiraceae	CAG-632	CAG-632 sp017623675
RGVC936	RUG10488	Rumen Superset	tRNA	Bacteria	Firmicutes_A	Clostridia	Lachnospirales	Lachnospiraceae	CAG-603	CAG-603 sp900314555
RGVC936	RUG10801	Rumen Superset	tRNA	Bacteria	Firmicutes_A	Clostridia	Lachnospirales	Lachnospiraceae	Agathobacter	Agathobacter faecis
RGVC936	RUG11236	Rumen Superset	tRNA	Bacteria	Firmicutes_A	Clostridia	Lachnospirales	Lachnospiraceae	AC2028	AC2028 sp902767075
RGVC936	RUG12796	Rumen Superset	tRNA	Bacteria	Firmicutes_A	Clostridia	Lachnospirales	Lachnospiraceae	CAG-603	CAG-603 sp900110975
RGVC936	RUG13871	Rumen Superset	tRNA	Bacteria	Firmicutes_A	Clostridia	Lachnospirales	Lachnospiraceae	Acetatifactor	Acetatifactor sp900320485
RGVC936	RUG14197	Rumen Superset	tRNA	Bacteria	Firmicutes_A	Clostridia	Lachnospirales	Lachnospiraceae	Lachnospira	Lachnospira eligens_A
RGVC936	RUG14938	Rumen Superset	tRNA	Bacteria	Firmicutes_A	Clostridia	Lachnospirales	Lachnospiraceae	RUG147	RUG147 sp900315495
RGVC936	SOL_BUTY22	Rumen Superset	tRNA	Bacteria	Firmicutes_A	Clostridia	Lachnospirales	Lachnospiraceae	RGIG3040
RGVC937	RGIG2126	Illumina Sequencing	tRNA	Bacteria	Bacteroidota	Bacteroidia	Bacteroidales	Bacteroidaceae	Phocaeicola
RGVC937	RGIG3096	Illumina Sequencing	tRNA	Bacteria	Firmicutes_A	Clostridia	Christensenellales	CAG-138	RGIG3096	RGIG3096 sp017435185
RGVC937	RGIG321	Illumina Sequencing	tRNA	Bacteria	Firmicutes_A	Clostridia	Oscillospirales	CAG-382	SFLA01	SFLA01 sp017381715
RGVC937	RUG10755	Rumen Superset	tRNA	Bacteria	Firmicutes_A	Clostridia	Oscillospirales	Acutalibacteraceae	UBA1213	UBA1213 sp902762335
RGVC937	RUG10806	Rumen Superset	tRNA	Bacteria	Firmicutes_A	Clostridia	Oscillospirales	Acutalibacteraceae	UBA737	UBA737 sp902762875
RGVC937	RUG12471	Rumen Superset	tRNA	Bacteria	Firmicutes_A	Clostridia	Oscillospirales	Acutalibacteraceae	Fimenecus	Fimenecus sp900315985
RGVC937	RUG12816	Rumen Superset	tRNA	Bacteria	Firmicutes_A	Clostridia	Saccharofermentanales	Saccharofermentanaceae	Saccharofermentans	Saccharofermentans sp902782985
RGVC939	HUN_Ruminococcus_flavefaciens_MA2007	Rumen Superset	tRNA	Bacteria	Firmicutes_A	Clostridia	Oscillospirales	Ruminococcaceae	Ruminococcus	Ruminococcus flavefaciens_E
RGVC939	RGIG3769	Illumina Sequencing	tRNA	Bacteria	Firmicutes_A	Clostridia	Lachnospirales	Lachnospiraceae	Butyrivibrio
RGVC939	RGIG4735	Illumina Sequencing	tRNA	Bacteria	Firmicutes_A	Clostridia	Oscillospirales	Ruminococcaceae	Ruminococcus	Ruminococcus sp015066935
RGVC939	RGIG4760	Illumina Sequencing	tRNA	Bacteria	Firmicutes_A	Clostridia	Oscillospirales	Ruminococcaceae	Ruminococcus_C	Ruminococcus_C sp017480865
RGVC939	RGIG6295	Illumina Sequencing	tRNA	Bacteria	Firmicutes_A	Clostridia	Oscillospirales	Ruminococcaceae	Ruminococcus	Ruminococcus sp017516465
RGVC939	RGIG8566	Illumina Sequencing	tRNA	Bacteria	Firmicutes_A	Clostridia	Oscillospirales	Ruminococcaceae	Ruminococcus	Ruminococcus sp017624895
RGVC939	RUG13392	Rumen Superset	tRNA	Bacteria	Firmicutes_A	Clostridia	Oscillospirales	Ruminococcaceae	Ruminococcus	Ruminococcus sp900315975
RGVC939	RUG13742	Rumen Superset	tRNA	Bacteria	Firmicutes_A	Clostridia	Oscillospirales	Ruminococcaceae	Ruminococcus	Ruminococcus flavefaciens_U
RGVC939	goat-flye.maxbin.093.contigs	HiFi Sequencing	tRNA	Bacteria	Firmicutes_A	Clostridia	Lachnospirales	Lachnospiraceae	RUG306	RUG306 sp902772635
RGVC939	RUG14155	Rumen Superset	tRNA	Bacteria	Firmicutes_A	Clostridia	Oscillospirales	Ruminococcaceae	UBA3855	UBA3855 sp902796255
RGVC939	RUG14281	Rumen Superset	tRNA	Bacteria	Firmicutes_A	Clostridia	Oscillospirales	Ruminococcaceae	Ruminococcus_D	Ruminococcus_D sp902797485
RGVC939	RUG14768	Rumen Superset	tRNA	Bacteria	Firmicutes_A	Clostridia	Oscillospirales	Acutalibacteraceae	UBA737	UBA737 sp902802375
RGVC941	RGIG6173	Illumina Sequencing	tRNA	Bacteria	Firmicutes_A	Clostridia	Oscillospirales	CAG-272	UBA1740	UBA1740 sp017522795
RGVC943	RUG12287	Rumen Superset	tRNA	Bacteria	Firmicutes_A	Clostridia	Oscillospirales	Oscillospiraceae	Limivicinus
RGVC943	RUG14822	Rumen Superset	tRNA	Bacteria	Firmicutes_A	Clostridia	Oscillospirales	Acutalibacteraceae	UBA1213	UBA1213 sp902802985
RGVC944	RGIG1971	Illumina Sequencing	tRNA	Bacteria	Firmicutes_A	Clostridia	Oscillospirales	Ruminococcaceae	Faecivivens	Faecivivens sp017396055
RGVC944	RUG11891	Rumen Superset	tRNA	Bacteria	Firmicutes_A	Clostridia	Oscillospirales	Oscillospiraceae	Evtepia	Evtepia sp902781745
RGVC945	HUN_Ruminococcus_sp_NK3A76	Rumen Superset	tRNA	Bacteria	Firmicutes_A	Clostridia	Oscillospirales	Ruminococcaceae	Ruminococcus_D	Ruminococcus_D sp000686125
RGVC945	RGIG1971	Illumina Sequencing	tRNA	Bacteria	Firmicutes_A	Clostridia	Oscillospirales	Ruminococcaceae	Faecivivens	Faecivivens sp017396055
RGVC945	RGIG6405	Illumina Sequencing	tRNA	Bacteria	Firmicutes_A	Clostridia	Oscillospirales	Ruminococcaceae	UMGS1668	UMGS1668 sp017536625
RGVC945	RGIG975	Illumina Sequencing	tRNA	Bacteria	Firmicutes_A	Clostridia	Oscillospirales	Acutalibacteraceae	UBA737	UBA737 sp017390725
RGVC945	RUG14768	Rumen Superset	tRNA	Bacteria	Firmicutes_A	Clostridia	Oscillospirales	Acutalibacteraceae	UBA737	UBA737 sp902802375
RGVC946	RUG14926	Rumen Superset	tRNA	Bacteria	Firmicutes_A	Clostridia	Oscillospirales	Ruminococcaceae	Ruminococcus	Ruminococcus flavefaciens_R
RGVC952	RGIG1930	Illumina Sequencing	tRNA	Bacteria	Firmicutes_A	Clostridia	Christensenellales	Borkfalkiaceae	UBA1259	UBA1259 sp017414525
RGVC952	RGIG3255	Illumina Sequencing	tRNA	Bacteria	Firmicutes_A	Clostridia	Christensenellales	Borkfalkiaceae	UBA1259	UBA1259 sp017448355
RGVC952	RGIG4105	Illumina Sequencing	tRNA	Bacteria	Firmicutes_A	Clostridia	Christensenellales	Borkfalkiaceae	UBA1259	UBA1259 sp017467345
RGVC952	RGIG5378	Illumina Sequencing	tRNA	Bacteria	Firmicutes_A	Clostridia	Christensenellales	Borkfalkiaceae	UBA1259	UBA1259 sp017503265
RGVC956	RGIG3971	Illumina Sequencing	tRNA	Bacteria	Firmicutes_A	Clostridia	Christensenellales	CAG-314	Fimimonas	Fimimonas sp017452035
RGVC956	RGIG5574	Illumina Sequencing	tRNA	Bacteria	Firmicutes_A	Clostridia	Christensenellales	CAG-314	Fimimonas	Fimimonas sp017457305
RGVC959	RGIG6273	Illumina Sequencing	tRNA	Bacteria	Verrucomicrobiota	Lentisphaeria	Victivallales	UBA1829	SIG77
RGVC960	RGIG7447	Illumina Sequencing	tRNA	Bacteria	Firmicutes_A	Clostridia	Oscillospirales	Oscillospiraceae	CAG-83	CAG-83 sp017549325
RGVC964	RUG14158	Rumen Superset	tRNA	Bacteria	Firmicutes_A	Clostridia	Oscillospirales	Oscillospiraceae	CAG-170	CAG-170 sp902796245
RGVC964	RUG14822	Rumen Superset	tRNA	Bacteria	Firmicutes_A	Clostridia	Oscillospirales	Acutalibacteraceae	UBA1213	UBA1213 sp902802985
RGVC965	RGIG1792	Illumina Sequencing	tRNA	Bacteria	Firmicutes_A	Clostridia	Christensenellales	Borkfalkiaceae	Scatosoma	Scatosoma sp017415505
RGVC965	RGIG2187	Illumina Sequencing	tRNA	Bacteria	Firmicutes_A	Clostridia	Christensenellales	Borkfalkiaceae	Scatosoma	Scatosoma sp017408045
RGVC965	RGIG5336	Illumina Sequencing	tRNA	Bacteria	Firmicutes_A	Clostridia	Christensenellales	Borkfalkiaceae	Scatosoma	Scatosoma sp017504065
RGVC965	RGIG5485	Illumina Sequencing	tRNA	Bacteria	Firmicutes_A	Clostridia	Christensenellales	Borkfalkiaceae	Scatosoma	Scatosoma sp017501125
RGVC965	RGIG8476	Illumina Sequencing	tRNA	Bacteria	Firmicutes_A	Clostridia	Christensenellales	Borkfalkiaceae	RGIG8762	RGIG8762 sp017626495
RGVC965	RGIG8733	Illumina Sequencing	tRNA	Bacteria	Firmicutes_A	Clostridia	Christensenellales	Borkfalkiaceae	Gallimonas	Gallimonas sp017621735
RGVC967	RUG10217	Rumen Superset	tRNA	Bacteria	Firmicutes_A	Clostridia	Oscillospirales	Oscillospiraceae	Limivicinus	Limivicinus sp900319835
RGVC969	RGIG354	Illumina Sequencing	tRNA	Bacteria	Firmicutes_A	Clostridia	Oscillospirales	Oscillospiraceae	Dysosmobacter	Dysosmobacter sp017380995
RGVC969	RGIG4961	Illumina Sequencing	tRNA	Bacteria	Firmicutes_A	Clostridia	Oscillospirales	Oscillospiraceae	Dysosmobacter	Dysosmobacter sp017469475
RGVC970	RGIG1669	Illumina Sequencing	tRNA	Bacteria	Firmicutes_A	Clostridia	Oscillospirales	Oscillospiraceae	Lawsonibacter	Lawsonibacter sp017416685
RGVC970	RGIG4454	Illumina Sequencing	tRNA	Bacteria	Firmicutes_A	Clostridia	Oscillospirales	Oscillospiraceae	HGM13006	HGM13006 sp017469795
RGVC970	RGIG8581	Illumina Sequencing	tRNA	Bacteria	Firmicutes_A	Clostridia	Oscillospirales	Oscillospiraceae	Faecousia	Faecousia sp017624645
RGVC970	RUG10255	Rumen Superset	tRNA	Bacteria	Firmicutes_A	Clostridia	Oscillospirales	Oscillospiraceae	Faecousia	Faecousia sp900316335
RGVC970	RUG13751	Rumen Superset	tRNA	Bacteria	Firmicutes_A	Clostridia	Oscillospirales	Oscillospiraceae	Faecousia	Faecousia sp900316335
RGVC973	RGIG5525	Illumina Sequencing	tRNA	Bacteria	Verrucomicrobiota	Lentisphaeria	Victivallales	Victivallaceae	UBA1784	UBA1784 sp017508385
RGVC973	RGIG9499	Illumina Sequencing	tRNA	Bacteria	Verrucomicrobiota	Lentisphaeria	Victivallales	Victivallaceae	UBA1784	UBA1784 sp017629975
RGVC974	RGIG1694	Illumina Sequencing	tRNA	Bacteria	Firmicutes_A	Clostridia	Lachnospirales	Lachnospiraceae	RUG11237	RUG11237 sp017399445
RGVC974	RGIG7100	Illumina Sequencing	tRNA	Bacteria	Firmicutes_A	Clostridia	Christensenellales	CAG-74	Firm-10	Firm-10 sp017620115
RGVC974	RUG11088	Rumen Superset	tRNA	Bacteria	Firmicutes_A	Clostridia	Christensenellales	CAG-74	UBA2862	UBA2862 sp002350605
RGVC975	RGIG3821	Illumina Sequencing	tRNA	Bacteria	Firmicutes_A	Clostridia	Oscillospirales	CAG-272	UMGS1865
RGVC975	RGIG8357	Illumina Sequencing	tRNA	Bacteria	Firmicutes_A	Clostridia	Oscillospirales	CAG-272	UMGS1865	UMGS1865 sp017613355
RGVC975	RGIG9474	Illumina Sequencing	tRNA	Bacteria	Firmicutes_A	Clostridia	Oscillospirales	CAG-272	CAG-448
RGVC975	RGIG9838	Illumina Sequencing	tRNA	Bacteria	Firmicutes_A	Clostridia	Oscillospirales	CAG-272	HGM12713
RGVC976	RGIG7318	Illumina Sequencing	tRNA	Bacteria	Firmicutes_A	Clostridia	Christensenellales	CAG-74	Limiplasma	Limiplasma sp017547285
RGVC977	HUN_Eubacterium_ruminantium_strain_ATCC_17233	Rumen Superset	tRNA	Bacteria	Firmicutes_A	Clostridia	Lachnospirales	Lachnospiraceae	Eubacterium_Q	Eubacterium_Q ruminantium
RGVC978	RGIG3022	Illumina Sequencing	tRNA	Bacteria	Firmicutes_A	Clostridia	UMGS1883	UMGS1540	SIG447	SIG447 sp017436645
RGVC978	RGIG5380	Illumina Sequencing	tRNA	Bacteria	Firmicutes_A	Clostridia	Monoglobales	Monoglobaceae	SIG440	SIG440 sp017503225
RGVC979	RGIG4552	Illumina Sequencing	tRNA	Bacteria	Firmicutes_A	Clostridia	UBA1381	UBA1381	UBA1738	UBA1738 sp017468095
RGVC979	RGIG7507	Illumina Sequencing	tRNA	Bacteria	Firmicutes_A	Clostridia	UBA1381	UBA9506	RGIG1666	RGIG1666 sp017546245
RGVC979	RGIG8925	Illumina Sequencing	tRNA	Bacteria	Firmicutes_A	Clostridia	Oscillospirales	Acutalibacteraceae	UBA737	UBA737 sp017939855
RGVC979	RUG14775	Rumen Superset	tRNA	Bacteria	Firmicutes_A	Clostridia	Oscillospirales	Acutalibacteraceae	Ruminococcus_E	Ruminococcus_E sp900316555
RGVC981	RGIG8029	Illumina Sequencing	tRNA	Bacteria	Firmicutes_A	Clostridia	Peptostreptococcales	Anaerovoracaceae	RUG13409	RUG13409 sp017619905
RGVC982	RUG14822	Rumen Superset	tRNA	Bacteria	Firmicutes_A	Clostridia	Oscillospirales	Acutalibacteraceae	UBA1213	UBA1213 sp902802985
RGVC984	RGIG4585	Illumina Sequencing	tRNA	Bacteria	Firmicutes_A	Clostridia	Christensenellales	CAG-74	Ventricola
RGVC985	RGIG9522	Illumina Sequencing	tRNA	Bacteria	Verrucomicrobiota	Lentisphaeria	Victivallales	Victivallaceae	UBA1784	UBA1784 sp015061775
RGVC986	RUG11188	Rumen Superset	tRNA	Bacteria	Firmicutes_A	Clostridia	Lachnospirales	Lachnospiraceae	Eubacterium_G	Eubacterium_G sp902766735
RGVC986	RUG12885	Rumen Superset	tRNA	Bacteria	Firmicutes_A	Clostridia	Lachnospirales	UBA1390	RUG760	RUG760 sp902783575
RGVC988	RGIG7255	Illumina Sequencing	tRNA	Bacteria	Firmicutes_A	Clostridia	Oscillospirales	Oscillospiraceae	Faecousia	Faecousia sp017548065
RGVC988	RGIG8578	Illumina Sequencing	tRNA	Bacteria	Firmicutes_A	Clostridia	Oscillospirales	Oscillospiraceae	Faecousia	Faecousia sp017624715
RGVC988	RGIG9045	Illumina Sequencing	tRNA	Bacteria	Firmicutes_A	Clostridia	Oscillospirales	Oscillospiraceae	Faecousia	Faecousia sp017936985
RGVC989	RGIG7478	Illumina Sequencing	tRNA	Bacteria	Firmicutes_A	Clostridia	Lachnospirales	Lachnospiraceae	SFDP01	SFDP01 sp017558145
RGVC991	HUN_Faecalicatena_orotica_strain_NLAE_zl_C242_Ga0104394_101	Rumen Superset	tRNA	Bacteria	Firmicutes_A	Clostridia	Lachnospirales	Lachnospiraceae	Muricomes	Muricomes oroticus
RGVC991	RGIG1712	Illumina Sequencing	tRNA	Bacteria	Firmicutes_A	Clostridia	Lachnospirales	Lachnospiraceae	Faecalimonas	Faecalimonas sp017416155
RGVC991	RGIG2122	Illumina Sequencing	tRNA	Bacteria	Firmicutes_A	Clostridia	Oscillospirales	Acutalibacteraceae	CAG-177	CAG-177 sp017409265
RGVC991	RGIG4687	Illumina Sequencing	tRNA	Bacteria	Firmicutes_A	Clostridia	Lachnospirales	Lachnospiraceae	Faecalimonas	Faecalimonas sp017472665
RGVC991	RGIG4703	Illumina Sequencing	tRNA	Bacteria	Firmicutes_A	Clostridia	Lachnospirales	Lachnospiraceae	Agathobacter	Agathobacter sp017481285
RGVC991	RGIG6147	Illumina Sequencing	tRNA	Bacteria	Firmicutes_A	Clostridia	Peptostreptococcales	Anaerovoracaceae	Emergencia
RGVC991	RGIG6149	Illumina Sequencing	tRNA	Bacteria	Firmicutes_A	Clostridia	Lachnospirales	Lachnospiraceae	Agathobacter	Agathobacter sp017523185
RGVC991	RGIG6281	Illumina Sequencing	tRNA	Bacteria	Firmicutes_A	Clostridia	Lachnospirales	Lachnospiraceae	Acetatifactor	Acetatifactor sp017521605
RGVC991	RGIG7478	Illumina Sequencing	tRNA	Bacteria	Firmicutes_A	Clostridia	Lachnospirales	Lachnospiraceae	SFDP01	SFDP01 sp017558145
RGVC991	RUG10071	Rumen Superset	tRNA	Bacteria	Firmicutes_A	Clostridia	Lachnospirales	Lachnospiraceae	Faecalimonas	Faecalimonas sp900316755
RGVC991	RUG10801	Rumen Superset	tRNA	Bacteria	Firmicutes_A	Clostridia	Lachnospirales	Lachnospiraceae	Agathobacter	Agathobacter faecis
RGVC991	RUG11237	Rumen Superset	tRNA	Bacteria	Firmicutes_A	Clostridia	Lachnospirales	Lachnospiraceae	RUG11237	RUG11237 sp902767135
RGVC991	RUG11892	Rumen Superset	tRNA	Bacteria	Firmicutes_A	Clostridia	Lachnospirales	Lachnospiraceae	UBA2821	UBA2821 sp002351535
RGVC991	RUG13222	Rumen Superset	tRNA	Bacteria	Firmicutes_A	Clostridia	Peptostreptococcales	Anaerovoracaceae	RUG099	RUG099 sp902786855
RGVC991	RUG13378	Rumen Superset	tRNA	Bacteria	Firmicutes_A	Clostridia	Lachnospirales	Lachnospiraceae	Acetatifactor	Acetatifactor sp900320485
RGVC991	RUG13538	Rumen Superset	tRNA	Bacteria	Firmicutes_A	Clostridia	Lachnospirales	Lachnospiraceae	UBA3766	UBA3766 sp902789265
RGVC991	RUG13871	Rumen Superset	tRNA	Bacteria	Firmicutes_A	Clostridia	Lachnospirales	Lachnospiraceae	Acetatifactor	Acetatifactor sp900320485
RGVC991	RUG14158	Rumen Superset	tRNA	Bacteria	Firmicutes_A	Clostridia	Oscillospirales	Oscillospiraceae	CAG-170	CAG-170 sp902796245
RGVC991	RUG14201	Rumen Superset	tRNA	Bacteria	Firmicutes_A	Clostridia	Lachnospirales	Lachnospiraceae	Butyribacter	Butyribacter sp000436755
RGVC991	RUG14809	Rumen Superset	tRNA	Bacteria	Firmicutes_A	Clostridia	Oscillospirales	Oscillospiraceae	Limivicinus	Limivicinus sp900321275
RGVC991	RUG14938	Rumen Superset	tRNA	Bacteria	Firmicutes_A	Clostridia	Lachnospirales	Lachnospiraceae	RUG147	RUG147 sp900315495
RGVC992	RGIG3726	Illumina Sequencing	tRNA	Bacteria	Firmicutes_A	Clostridia	Oscillospirales	Butyricicoccaceae	RGIG3726	RGIG3726 sp017453985
RGVC994	RGIG4578	Illumina Sequencing	tRNA	Bacteria	Firmicutes_A	Clostridia	Oscillospirales	Ruminococcaceae	RGIG4131
RGVC994	RGIG95	Illumina Sequencing	tRNA	Bacteria	Firmicutes_A	Clostridia	Oscillospirales	Ruminococcaceae	RGIG4694
RGVC995	RGIG1694	Illumina Sequencing	tRNA	Bacteria	Firmicutes_A	Clostridia	Lachnospirales	Lachnospiraceae	RUG11237	RUG11237 sp017399445
RGVC995	RGIG4599	Illumina Sequencing	tRNA	Bacteria	Firmicutes_A	Clostridia	Oscillospirales	Oscillospiraceae	Faecousia	Faecousia sp017473455
RGVC995	RGIG7255	Illumina Sequencing	tRNA	Bacteria	Firmicutes_A	Clostridia	Oscillospirales	Oscillospiraceae	Faecousia	Faecousia sp017548065
RGVC995	RGIG7290	Illumina Sequencing	tRNA	Bacteria	Firmicutes_A	Clostridia	Oscillospirales	Ruminococcaceae	UMGS1668	UMGS1668 sp017547705
RGVC995	RGIG7395	Illumina Sequencing	tRNA	Bacteria	Firmicutes_A	Clostridia	Oscillospirales	Oscillospiraceae	RGIG7114
RGVC995	RGIG7498	Illumina Sequencing	tRNA	Bacteria	Firmicutes_A	Clostridia	Oscillospirales	Oscillospiraceae	Faecousia
RGVC995	RGIG8706	Illumina Sequencing	tRNA	Archaea	Halobacteriota	Methanomicrobia	Methanomicrobiales	Methanocorpusculaceae	Methanocorpusculum	Methanocorpusculum sp017622255
RGVC995	RGIG8937	Illumina Sequencing	tRNA	Bacteria	Firmicutes_A	Clostridia	Oscillospirales	Oscillospiraceae	Faecousia	Faecousia sp017939025
RGVC995	RGIG9400	Illumina Sequencing	tRNA	Bacteria	Firmicutes_A	Clostridia	Oscillospirales	Oscillospiraceae	Faecousia	Faecousia sp017632035
RGVC995	RGIG9441	Illumina Sequencing	tRNA	Bacteria	Firmicutes_A	Clostridia	Oscillospirales	Oscillospiraceae	Faecousia	Faecousia sp017631155
RGVC995	RGIG9881	Illumina Sequencing	tRNA	Bacteria	Firmicutes_A	Clostridia	Oscillospirales	Oscillospiraceae	Faecousia
RGVC995	RUG12281	Rumen Superset	tRNA	Bacteria	Firmicutes_A	Clostridia	Oscillospirales	Oscillospiraceae	Faecousia	Faecousia sp900315595
RGVC999	RGIG3884	Illumina Sequencing	tRNA	Bacteria	Firmicutes_A	Clostridia	Christensenellales	UBA1242	Onthoplasma
RGVC999	RGIG7349	Illumina Sequencing	tRNA	Bacteria	Firmicutes_A	Clostridia	Oscillospirales	CAG-382	SFLA01	SFLA01 sp017381715
RGVC1000	RGIG1656	Illumina Sequencing	tRNA	Bacteria	Firmicutes_A	Clostridia	UMGS1810	UMGS1810	RGIG1828	RGIG1828 sp017416845
RGVC1001	RGIG8073	Illumina Sequencing	tRNA	Bacteria	Firmicutes_A	Clostridia	Oscillospirales	CAG-272	CAG-390	CAG-390 sp900321265
RGVC1001	RUG11462	Rumen Superset	tRNA	Bacteria	Firmicutes_A	Clostridia	Oscillospirales	Acutalibacteraceae	RUG11462	RUG11462 sp902769255
RGVC1001	RUG14883	Rumen Superset	tRNA	Bacteria	Firmicutes_A	Clostridia	Oscillospirales	Acutalibacteraceae	RUG592	RUG592 sp900317815
RGVC1004	RGIG3126	Illumina Sequencing	tRNA	Bacteria	Firmicutes	Bacilli	Erysipelotrichales	Erysipelotrichaceae	RGIG4607
RGVC1005	RGIG354	Illumina Sequencing	tRNA	Bacteria	Firmicutes_A	Clostridia	Oscillospirales	Oscillospiraceae	Dysosmobacter	Dysosmobacter sp017380995
RGVC1005	RGIG727	Illumina Sequencing	tRNA	Bacteria	Firmicutes_A	Clostridia	Oscillospirales	Oscillospiraceae	CAG-83
RGVC1005	RUG11087	Rumen Superset	tRNA	Bacteria	Firmicutes_A	Clostridia	Christensenellales	CAG-138	RUG472	RUG472 sp900319345
RGVC1010	RGIG1529	Illumina Sequencing	tRNA	Bacteria	Firmicutes_A	Clostridia	Christensenellales	CAG-138	PeH17	PeH17 sp017395105
RGVC1010	RGIG2948	Illumina Sequencing	tRNA	Bacteria	Firmicutes_A	Clostridia	Christensenellales	CAG-138	UBA1685	UBA1685 sp017435905
RGVC1010	RGIG6260	Illumina Sequencing	tRNA	Bacteria	Firmicutes_A	Clostridia	Christensenellales	CAG-138	SFEL01
RGVC1010	RGIG730	Illumina Sequencing	tRNA	Bacteria	Firmicutes_A	Clostridia	Christensenellales	CAG-138	PeH17	PeH17 sp017525875
RGVC1010	RGIG8038	Illumina Sequencing	tRNA	Bacteria	Firmicutes_A	Clostridia	Christensenellales	CAG-138	UBA3857	UBA3857 sp017619735
RGVC1010	RUG13181	Rumen Superset	tRNA	Bacteria	Firmicutes_A	Clostridia	Christensenellales	CAG-138	RUG472	RUG472 sp902786465
RGVC1011	RGIG1787	Illumina Sequencing	tRNA	Bacteria	Desulfobacterota_I	Desulfovibrionia	Desulfovibrionales	Desulfovibrionaceae	Mailhella
RGVC1011	RGIG4096	Illumina Sequencing	tRNA	Bacteria	Desulfobacterota_I	Desulfovibrionia	Desulfovibrionales	Desulfovibrionaceae	Mailhella
RGVC1011	RGIG790	Illumina Sequencing	tRNA	Bacteria	Desulfobacterota_I	Desulfovibrionia	Desulfovibrionales	Desulfovibrionaceae	Desulfovibrio	Desulfovibrio sp016284885
RGVC1013	RGIG7100	Illumina Sequencing	tRNA	Bacteria	Firmicutes_A	Clostridia	Christensenellales	CAG-74	Firm-10	Firm-10 sp017620115
RGVC1013	RUG13857	Rumen Superset	tRNA	Bacteria	Firmicutes_A	Clostridia	Christensenellales	CAG-74	UBA2862	UBA2862 sp900315585
RGVC1017	RGIG3912	Illumina Sequencing	tRNA	Bacteria	Firmicutes_A	Clostridia	Christensenellales	Borkfalkiaceae	UBA10281	UBA10281 sp017453045
RGVC1017	RGIG5309	Illumina Sequencing	tRNA	Bacteria	Firmicutes_A	Clostridia	Christensenellales	Borkfalkiaceae	UBA10281	UBA10281 sp017504655
RGVC1017	RUG13273	Rumen Superset	tRNA	Bacteria	Firmicutes_A	Clostridia	Christensenellales	Borkfalkiaceae	UBA1259	UBA1259 sp900320065
RGVC1019	RGIG3964	Illumina Sequencing	tRNA	Bacteria	Firmicutes_A	Clostridia	Christensenellales	Borkfalkiaceae	UBA1259
RGVC1020	RUG14743	Rumen Superset	tRNA	Bacteria	Bacteroidota	Bacteroidia	Bacteroidales	Bacteroidaceae	Prevotella	Prevotella sp902771785
RGVC1023	RGIG9531	Illumina Sequencing	tRNA	Bacteria	Firmicutes_A	Clostridia	Oscillospirales	CAG-272	CAG-448	CAG-448 sp017629395
RGVC1026	RGIG6302	Illumina Sequencing	tRNA	Bacteria	Firmicutes_A	Clostridia	Lachnospirales	Anaerotignaceae	Anaerotignum	Anaerotignum sp017442465
RGVC1026	RGIG7269	Illumina Sequencing	tRNA	Bacteria	Firmicutes_A	Clostridia	Lachnospirales	Anaerotignaceae	Anaerotignum
RGVC1028	RGIG4077	Illumina Sequencing	tRNA	Bacteria	Firmicutes_A	Clostridia	Oscillospirales	Ruminococcaceae	Ruminococcus	Ruminococcus sp017513795
RGVC1028	RUG14021	Rumen Superset	tRNA	Bacteria	Firmicutes_A	Clostridia	Oscillospirales	Ruminococcaceae	Ruminococcus	Ruminococcus sp900315755
RGVC1028	RUG14155	Rumen Superset	tRNA	Bacteria	Firmicutes_A	Clostridia	Oscillospirales	Ruminococcaceae	UBA3855	UBA3855 sp902796255
RGVC1029	RGIG1914	Illumina Sequencing	tRNA	Bacteria	Firmicutes_A	Clostridia	Christensenellales	CAG-74	RUG11247
RGVC1029	RGIG4602	Illumina Sequencing	tRNA	Bacteria	Firmicutes_A	Clostridia	Christensenellales	CAG-74	Limiplasma	Limiplasma sp017473345
RGVC1029	RGIG6256	Illumina Sequencing	tRNA	Bacteria	Firmicutes_A	Clostridia	Christensenellales	CAG-74	Limiplasma	Limiplasma sp017516765
RGVC1029	RGIG7448	Illumina Sequencing	tRNA	Bacteria	Firmicutes_A	Clostridia	Christensenellales	CAG-74	SFMI01	SFMI01 sp017549335
RGVC1031	RGIG6639	Illumina Sequencing	tRNA	Bacteria	Bacteroidota	Bacteroidia	Bacteroidales	Paludibacteraceae	RGIG6639	RGIG6639 sp017527495
RGVC1031	RGIG8770	Illumina Sequencing	tRNA	Bacteria	Bacteroidota	Bacteroidia	Bacteroidales	Muribaculaceae	CAG-873	CAG-873 sp017621055
RGVC1031	RGIG8786	Illumina Sequencing	tRNA	Bacteria	Bacteroidota	Bacteroidia	Bacteroidales	Muribaculaceae	Paramuribaculum	Paramuribaculum sp017620715
RGVC1031	RGIG9150	Illumina Sequencing	tRNA	Bacteria	Bacteroidota	Bacteroidia	Bacteroidales	Muribaculaceae	Duncaniella	Duncaniella sp910588795
RGVC1031	RUG12556	Rumen Superset	tRNA	Bacteria	Bacteroidota	Bacteroidia	Bacteroidales	SZUA-534	RUG13583	RUG13583 sp902790595
RGVC1031	RUG12638	Rumen Superset	tRNA	Bacteria	Bacteroidota	Bacteroidia	Bacteroidales	Muribaculaceae	Sodaliphilus	Sodaliphilus sp900318065
RGVC1031	RUG14372	Rumen Superset	tRNA	Bacteria	Bacteroidota	Bacteroidia	Bacteroidales	Bacteroidaceae	UBA4372	UBA4372 sp902801325
RGVC1031	RUG14526	Rumen Superset	tRNA	Bacteria	Bacteroidota	Bacteroidia	Bacteroidales	Bacteroidaceae	UBA4372	UBA4372 sp902799985
RGVC1031	RUG14576	Rumen Superset	tRNA	Bacteria	Bacteroidota	Bacteroidia	Bacteroidales	Paludibacteraceae	RF16	RF16 sp902800525
RGVC1031	RUG14666	Rumen Superset	tRNA	Bacteria	Bacteroidota	Bacteroidia	Bacteroidales	Bacteroidaceae	UBA4372	UBA4372 sp902778625
RGVC1032	RGIG1833	Illumina Sequencing	tRNA	Bacteria	Firmicutes_A	Clostridia	Oscillospirales	Oscillospiraceae	Lawsonibacter	Lawsonibacter sp017397835
RGVC1032	RGIG4651	Illumina Sequencing	tRNA	Bacteria	Firmicutes_A	Clostridia	Oscillospirales	Oscillospiraceae	Faecousia	Faecousia sp017482385
RGVC1032	RGIG6955	Illumina Sequencing	tRNA	Bacteria	Firmicutes_A	Clostridia	Oscillospirales	Oscillospiraceae	SIG483	SIG483 sp017539885
RGVC1033	RUG13751	Rumen Superset	tRNA	Bacteria	Firmicutes_A	Clostridia	Oscillospirales	Oscillospiraceae	Faecousia	Faecousia sp900316335
RGVC1034	RGIG420	Illumina Sequencing	tRNA	Bacteria	Firmicutes_B	Peptococcia	Peptococcales	Peptococcaceae	UBA7185	UBA7185 sp017387265
RGVC1034	RGIG876	Illumina Sequencing	tRNA	Bacteria	Firmicutes_B	Peptococcia	Peptococcales	Peptococcaceae	UBA7185	UBA7185 sp017387265
RGVC1034	RGIG9127	Illumina Sequencing	tRNA	Bacteria	Firmicutes_B	Peptococcia	Peptococcales	Peptococcaceae	UBA7185	UBA7185 sp017622155
RGVC1039	RGIG9400	Illumina Sequencing	tRNA	Bacteria	Firmicutes_A	Clostridia	Oscillospirales	Oscillospiraceae	Faecousia	Faecousia sp017632035
RGVC1039	RUG12281	Rumen Superset	tRNA	Bacteria	Firmicutes_A	Clostridia	Oscillospirales	Oscillospiraceae	Faecousia	Faecousia sp900315595
RGVC1041	RUG14340	Rumen Superset	tRNA	Bacteria	Firmicutes_A	Clostridia	Christensenellales	CAG-74	UBA2862	UBA2862 sp902798105
RGVC1044	RGIG8064	Illumina Sequencing	tRNA	Bacteria	Firmicutes_A	Clostridia	Lachnospirales	Lachnospiraceae	SIG280
RGVC1046	RGIG3575	Illumina Sequencing	tRNA	Bacteria	Firmicutes_A	Clostridia	Oscillospirales	Acutalibacteraceae	RUG806	RUG806 sp017443805
RGVC1046	RGIG6395	Illumina Sequencing	tRNA	Bacteria	Firmicutes_A	Clostridia	Oscillospirales	Acutalibacteraceae	RUG806	RUG806 sp015065425
RGVC1046	RUG14782	Rumen Superset	tRNA	Bacteria	Firmicutes_A	Clostridia	Oscillospirales	Acutalibacteraceae	Ruminococcus_E	Ruminococcus_E sp900317315
RGVC1046	RUG14847	Rumen Superset	tRNA	Bacteria	Firmicutes_A	Clostridia	Oscillospirales	Acutalibacteraceae	CAG-177	CAG-177 sp902796295
RGVC1048	RGIG8855	Illumina Sequencing	tRNA	Bacteria	Bacteroidota	Bacteroidia	Bacteroidales	Bacteroidaceae	Prevotella	Prevotella sp902797505
RGVC1051	RGIG4680	Illumina Sequencing	tRNA	Bacteria	Firmicutes_A	Clostridia	Oscillospirales	Acutalibacteraceae	UBA737	UBA737 sp017481865
RGVC1051	RGIG5014	Illumina Sequencing	tRNA	Bacteria	Firmicutes_A	Clostridia	Oscillospirales	Acutalibacteraceae	RGIG2774	RGIG2774 sp017480115
RGVC1051	RUG13058	Rumen Superset	tRNA	Bacteria	Firmicutes_A	Clostridia	Oscillospirales	Acutalibacteraceae	UBA1213	UBA1213 sp900317395
RGVC1053	RGIG9597	Illumina Sequencing	tRNA	Bacteria	Firmicutes_A	Clostridia	Oscillospirales	CAG-272	RGIG3925	RGIG3925 sp017628075
RGVC1056	RGIG3880	Illumina Sequencing	tRNA	Bacteria	Firmicutes_A	Clostridia	Christensenellales	UBA1242	UBA7862
RGVC1059	RGIG4530	Illumina Sequencing	tRNA	Bacteria	Firmicutes_A	Clostridia	Lachnospirales	Lachnospiraceae	SIG332	SIG332 sp017468395
RGVC1059	RGIG6397	Illumina Sequencing	tRNA	Bacteria	Firmicutes_A	Clostridia	Lachnospirales	Lachnospiraceae	SFDP01	SFDP01 sp017521195
RGVC1059	RGIG7016	Illumina Sequencing	tRNA	Bacteria	Firmicutes_A	Clostridia	Lachnospirales	Lachnospiraceae	UBA1753	UBA1753 sp017544285
RGVC1059	RGIG8674	Illumina Sequencing	tRNA	Bacteria	Firmicutes_A	Clostridia	Lachnospirales	Lachnospiraceae	Acetatifactor	Acetatifactor intestinalis
RGVC1059	RGIG8776	Illumina Sequencing	tRNA	Bacteria	Firmicutes_A	Clostridia	Lachnospirales	Lachnospiraceae	Acetatifactor	Acetatifactor sp017620975
RGVC1059	RGIG8880	Illumina Sequencing	tRNA	Bacteria	Firmicutes_A	Clostridia	Lachnospirales	Lachnospiraceae	Butyrivibrio	Butyrivibrio sp017940685
RGVC1059	RUG10488	Rumen Superset	tRNA	Bacteria	Firmicutes_A	Clostridia	Lachnospirales	Lachnospiraceae	CAG-603	CAG-603 sp900314555
RGVC1059	RUG10801	Rumen Superset	tRNA	Bacteria	Firmicutes_A	Clostridia	Lachnospirales	Lachnospiraceae	Agathobacter	Agathobacter faecis
RGVC1059	RUG12021	Rumen Superset	tRNA	Bacteria	Firmicutes_A	Clostridia	Lachnospirales	Lachnospiraceae	UBA1066	UBA1066 sp902776305
RGVC1059	RUG13871	Rumen Superset	tRNA	Bacteria	Firmicutes_A	Clostridia	Lachnospirales	Lachnospiraceae	Acetatifactor	Acetatifactor sp900320485
RGVC1059	RUG14677	Rumen Superset	tRNA	Bacteria	Firmicutes_A	Clostridia	Lachnospirales	Lachnospiraceae	CAG-603	CAG-603 sp900314525
RGVC1059	RUG14770	Rumen Superset	tRNA	Bacteria	Firmicutes_A	Clostridia	Lachnospirales	Lachnospiraceae	UBA1066	UBA1066 sp900314565
RGVC1059	RUG14789	Rumen Superset	tRNA	Bacteria	Firmicutes_A	Clostridia	Lachnospirales	Lachnospiraceae	CAG-791	CAG-791 sp900320325
RGVC1059	RUG14809	Rumen Superset	tRNA	Bacteria	Firmicutes_A	Clostridia	Oscillospirales	Oscillospiraceae	Limivicinus	Limivicinus sp900321275
RGVC1059	RUG14938	Rumen Superset	tRNA	Bacteria	Firmicutes_A	Clostridia	Lachnospirales	Lachnospiraceae	RUG147	RUG147 sp900315495
RGVC1059	SOL_BUTY22	Rumen Superset	tRNA	Bacteria	Firmicutes_A	Clostridia	Lachnospirales	Lachnospiraceae	RGIG3040
RGVC1062	RGIG1694	Illumina Sequencing	tRNA	Bacteria	Firmicutes_A	Clostridia	Lachnospirales	Lachnospiraceae	RUG11237	RUG11237 sp017399445
RGVC1062	RGIG3479	Illumina Sequencing	tRNA	Bacteria	Firmicutes_A	Clostridia	Oscillospirales	Oscillospiraceae	RGIG3566	RGIG3566 sp017445385
RGVC1062	RGIG4204	Illumina Sequencing	tRNA	Bacteria	Firmicutes_A	Clostridia	Oscillospirales	Oscillospiraceae	Faecousia
RGVC1062	RGIG8958	Illumina Sequencing	tRNA	Bacteria	Firmicutes_A	Clostridia	Oscillospirales	Oscillospiraceae	Avoscillospira	Avoscillospira sp017938625
RGVC1062	RGIG9441	Illumina Sequencing	tRNA	Bacteria	Firmicutes_A	Clostridia	Oscillospirales	Oscillospiraceae	Faecousia	Faecousia sp017631155
RGVC1062	RUG14158	Rumen Superset	tRNA	Bacteria	Firmicutes_A	Clostridia	Oscillospirales	Oscillospiraceae	CAG-170	CAG-170 sp902796245
RGVC1063	RGIG1988	Illumina Sequencing	tRNA	Bacteria	Firmicutes_A	Clostridia	UBA1381	UBA1381	RGIG1988	RGIG1988 sp017420825
RGVC1063	RGIG8709	Illumina Sequencing	tRNA	Bacteria	Firmicutes_A	Clostridia	Monoglobales	Monoglobaceae	RGIG8709	RGIG8709 sp017622215
RGVC1066	RGIG9029	Illumina Sequencing	tRNA	Bacteria	Firmicutes_A	Clostridia	Oscillospirales	Oscillospiraceae	CAG-83	CAG-83 sp004555205
RGVC1066	RGIG9120	Illumina Sequencing	tRNA	Bacteria	Firmicutes_A	Clostridia	HGM11327	HGM11327	SIG351	SIG351 sp017935525
RGVC1066	RUG13585	Rumen Superset	tRNA	Bacteria	Firmicutes_A	Clostridia	Oscillospirales	Oscillospiraceae	Faecousia	Faecousia sp900315595
RGVC1066	RUG14822	Rumen Superset	tRNA	Bacteria	Firmicutes_A	Clostridia	Oscillospirales	Acutalibacteraceae	UBA1213	UBA1213 sp902802985
RGVC1069	RGIG1626	Illumina Sequencing	tRNA	Bacteria	Firmicutes_C	Negativicutes	Selenomonadales	Selenomonadaceae	Quinella	Quinella sp017518105
RGVC1069	RGIG6644	Illumina Sequencing	tRNA	Bacteria	Firmicutes_A	Clostridia	Oscillospirales	Oscillospiraceae	Dysosmobacter	Dysosmobacter sp017527365
RGVC1070	RUG14577	Rumen Superset	tRNA	Archaea	Methanobacteriota	Methanobacteria	Methanobacteriales	Methanobacteriaceae	Methanobrevibacter_A	Methanobrevibacter_A sp900316895
RGVC1070	RUG14594	Rumen Superset	tRNA	Archaea	Methanobacteriota	Methanobacteria	Methanobacteriales	Methanobacteriaceae	Methanobrevibacter_A	Methanobrevibacter_A sp900319985
RGVC1074	RGIG4214	Illumina Sequencing	tRNA	Bacteria	Firmicutes_A	Clostridia	Oscillospirales	Oscillospiraceae	Dysosmobacter
RGVC1074	RUG14822	Rumen Superset	tRNA	Bacteria	Firmicutes_A	Clostridia	Oscillospirales	Acutalibacteraceae	UBA1213	UBA1213 sp902802985
RGVC1075	RGIG967	Illumina Sequencing	tRNA	Bacteria	Firmicutes	Bacilli	RF39	UBA660	CAJGDV01	CAJGDV01 sp904502155
RGVC1076	RGIG8959	Illumina Sequencing	tRNA	Bacteria	Firmicutes_A	Clostridia	Christensenellales	CAG-74	Limiplasma	Limiplasma sp017938645
RGVC1079	RGIG7005	Illumina Sequencing	tRNA	Bacteria	Firmicutes	Bacilli	RF39	UBA660	CAG-1000	CAG-1000 sp017544525
RGVC1080	RGIG2233	Illumina Sequencing	tRNA	Bacteria	Patescibacteria	Saccharimonadia	Saccharimonadales	Nanosyncoccaceae	Nanosyncoccus	Nanosyncoccus sp017404685
RGVC1080	RGIG4545	Illumina Sequencing	tRNA	Bacteria	Firmicutes_A	Clostridia	UMGS1883	UMGS1883	RGIG1927	RGIG1927 sp017468215
RGVC1080	RGIG4659	Illumina Sequencing	tRNA	Bacteria	Firmicutes_A	Clostridia	Oscillospirales	Ruminococcaceae	Negativibacillus
RGVC1080	RUG12287	Rumen Superset	tRNA	Bacteria	Firmicutes_A	Clostridia	Oscillospirales	Oscillospiraceae	Limivicinus
RGVC1080	RUG13887	Rumen Superset	tRNA	Bacteria	Firmicutes_A	Clostridia	Oscillospirales	Acutalibacteraceae	Fimenecus	Fimenecus sp900315985
RGVC1080	RUG14822	Rumen Superset	tRNA	Bacteria	Firmicutes_A	Clostridia	Oscillospirales	Acutalibacteraceae	UBA1213	UBA1213 sp902802985
RGVC1081	RUG10597	Rumen Superset	tRNA	Bacteria	Bacteroidota	Bacteroidia	Bacteroidales	Bacteroidaceae	Prevotella	Prevotella sp002351725
RGVC1081	RUG11582	Rumen Superset	tRNA	Bacteria	Bacteroidota	Bacteroidia	Bacteroidales	Bacteroidaceae	Prevotella	Prevotella sp900315775
RGVC1081	RUG14797	Rumen Superset	tRNA	Bacteria	Bacteroidota	Bacteroidia	Bacteroidales	Bacteroidaceae	Prevotella	Prevotella sp900314995
RGVC1081	SVA_106_bin108	Rumen Superset	tRNA	Bacteria	Bacteroidota	Bacteroidia	Bacteroidales	Bacteroidaceae	Prevotella
RGVC1081	UBA4359	Rumen Superset	tRNA	Bacteria	Bacteroidota	Bacteroidia	Bacteroidales	Bacteroidaceae	UBA4334	UBA4334 sp002393555
RGVC1084	RGIG7416	Illumina Sequencing	tRNA	Bacteria	Firmicutes_A	Clostridia	Oscillospirales	Oscillospiraceae	CAG-83
RGVC1084	RUG10937	Rumen Superset	tRNA	Bacteria	Firmicutes_A	Clostridia	Oscillospirales	Oscillospiraceae	CAG-83	CAG-83 sp902765025
RGVC1084	RUG11372	Rumen Superset	tRNA	Bacteria	Firmicutes_A	Clostridia	Oscillospirales	Acutalibacteraceae	Ruminococcus_E	Ruminococcus_E sp900317595
RGVC1085	RGIG7763	Illumina Sequencing	tRNA	Bacteria	Firmicutes_A	Clostridia	Oscillospirales	Butyricicoccaceae	RGIG3513	RGIG3513 sp017556565
RGVC1089	RGIG9127	Illumina Sequencing	tRNA	Bacteria	Firmicutes_B	Peptococcia	Peptococcales	Peptococcaceae	UBA7185	UBA7185 sp017622155
RGVC1090	HUN_Oscillibacter_sp_PC13	Rumen Superset	tRNA	Bacteria	Firmicutes_A	Clostridia	Oscillospirales	Oscillospiraceae	Dysosmobacter	Dysosmobacter sp900115635
RGVC1090	RUG11719	Rumen Superset	tRNA	Bacteria	Firmicutes_A	Clostridia	Oscillospirales	Oscillospiraceae	RUG626	RUG626 sp900317385
RGVC1091	RUG11088	Rumen Superset	tRNA	Bacteria	Firmicutes_A	Clostridia	Christensenellales	CAG-74	UBA2862	UBA2862 sp002350605
RGVC1093	RGIG1694	Illumina Sequencing	tRNA	Bacteria	Firmicutes_A	Clostridia	Lachnospirales	Lachnospiraceae	RUG11237	RUG11237 sp017399445
RGVC1093	goat-flye.maxbin.093.contigs	HiFi Sequencing	tRNA	Bacteria	Firmicutes_A	Clostridia	Lachnospirales	Lachnospiraceae	RUG306	RUG306 sp902772635
RGVC1094	RGIG6870	Illumina Sequencing	tRNA	Bacteria	Firmicutes_A	Clostridia	Christensenellales	Christensenellaceae	QANA01	QANA01 sp017439085
RGVC1095	RGIG4036	Illumina Sequencing	tRNA	Bacteria	Firmicutes_A	Clostridia	Christensenellales	Borkfalkiaceae	Scatosoma	Scatosoma sp017463145
RGVC1095	RGIG4069	Illumina Sequencing	tRNA	Bacteria	Firmicutes_A	Clostridia	Christensenellales	Borkfalkiaceae	Scatosoma	Scatosoma sp017462505
RGVC1095	RGIG5320	Illumina Sequencing	tRNA	Bacteria	Firmicutes_A	Clostridia	Christensenellales	Borkfalkiaceae	Scatosoma	Scatosoma sp017504465
RGVC1095	RGIG5368	Illumina Sequencing	tRNA	Bacteria	Firmicutes_A	Clostridia	Christensenellales	Borkfalkiaceae	Scatosoma	Scatosoma sp017503525
RGVC1095	RGIG8483	Illumina Sequencing	tRNA	Bacteria	Firmicutes_A	Clostridia	Christensenellales	Borkfalkiaceae	Scatosoma	Scatosoma sp017626305
RGVC1095	RGIG8569	Illumina Sequencing	tRNA	Bacteria	Firmicutes_A	Clostridia	Christensenellales	Borkfalkiaceae	Scatosoma	Scatosoma sp015069565
RGVC1096	RGIG7498	Illumina Sequencing	tRNA	Bacteria	Firmicutes_A	Clostridia	Oscillospirales	Oscillospiraceae	Faecousia
RGVC1096	RGIG8706	Illumina Sequencing	tRNA	Archaea	Halobacteriota	Methanomicrobia	Methanomicrobiales	Methanocorpusculaceae	Methanocorpusculum	Methanocorpusculum sp017622255
RGVC1096	RGIG8926	Illumina Sequencing	tRNA	Bacteria	Firmicutes_A	Clostridia	Oscillospirales	Oscillospiraceae	CAG-83
RGVC1096	RGIG9120	Illumina Sequencing	tRNA	Bacteria	Firmicutes_A	Clostridia	HGM11327	HGM11327	SIG351	SIG351 sp017935525
RGVC1096	RUG11036	Rumen Superset	tRNA	Bacteria	Firmicutes_A	Clostridia	Oscillospirales	Oscillospiraceae	ER4	ER4 sp900317525
RGVC1096	RUG12591	Rumen Superset	tRNA	Bacteria	Firmicutes_A	Clostridia	Oscillospirales	Oscillospiraceae	RUG626	RUG626 sp900317385
RGVC1096	RUG13187	Rumen Superset	tRNA	Bacteria	Firmicutes_A	Clostridia	Oscillospirales	Oscillospiraceae	CAG-83	CAG-83 sp902765025
RGVC1096	RUG14754	Rumen Superset	tRNA	Bacteria	Firmicutes_A	Clostridia	Oscillospirales	Oscillospiraceae	Limivicinus	Limivicinus sp902802215
RGVC1096	RUG14822	Rumen Superset	tRNA	Bacteria	Firmicutes_A	Clostridia	Oscillospirales	Acutalibacteraceae	UBA1213	UBA1213 sp902802985
RGVC1098	RGIG6506	Illumina Sequencing	tRNA	Bacteria	Bacteroidota	Bacteroidia	Bacteroidales	Rikenellaceae	Tidjanibacter	Tidjanibacter sp017935385
RGVC1098	RGIG8628	Illumina Sequencing	tRNA	Bacteria	Bacteroidota	Bacteroidia	Bacteroidales	Rikenellaceae	Alistipes	Alistipes sp017398695
RGVC1098	RGIG957	Illumina Sequencing	tRNA	Bacteria	Bacteroidota	Bacteroidia	Bacteroidales	Rikenellaceae	Alistipes	Alistipes sp017424405
RGVC1098	RGIG9584	Illumina Sequencing	tRNA	Bacteria	Bacteroidota	Bacteroidia	Bacteroidales	Rikenellaceae	Tidjanibacter	Tidjanibacter sp017628305
RGVC1098	RGIG9869	Illumina Sequencing	tRNA	Bacteria	Bacteroidota	Bacteroidia	Bacteroidales	Rikenellaceae	Alistipes	Alistipes sp017631275
RGVC1098	RUG12058	Rumen Superset	tRNA	Bacteria	Bacteroidota	Bacteroidia	Bacteroidales	Bacteroidaceae	Prevotella	Prevotella sp900316985
RGVC1098	RUG12667	Rumen Superset	tRNA	Bacteria	Bacteroidota	Bacteroidia	Bacteroidales	Muribaculaceae	Sodaliphilus	Sodaliphilus pleomorphus
RGVC1098	RUG13322	Rumen Superset	tRNA	Bacteria	Bacteroidota	Bacteroidia	Bacteroidales	UBA932	Cryptobacteroides	Cryptobacteroides sp900318955
RGVC1098	UBA3709	Rumen Superset	tRNA	Bacteria	Bacteroidota	Bacteroidia	Bacteroidales	UBA932	Egerieousia	Egerieousia sp002372015
RGVC1099	RGIG8780	Illumina Sequencing	tRNA	Bacteria	Firmicutes_A	Clostridia	Christensenellales	Borkfalkiaceae	UBA4675	UBA4675 sp017620875
RGVC1101	HUN_Oscillibacter_sp_PC13	Rumen Superset	tRNA	Bacteria	Firmicutes_A	Clostridia	Oscillospirales	Oscillospiraceae	Dysosmobacter	Dysosmobacter sp900115635
RGVC1101	RGIG2080	Illumina Sequencing	tRNA	Bacteria	Firmicutes_A	Clostridia	Oscillospirales	Oscillospiraceae	Dysosmobacter	Dysosmobacter sp017410185
RGVC1101	RGIG354	Illumina Sequencing	tRNA	Bacteria	Firmicutes_A	Clostridia	Oscillospirales	Oscillospiraceae	Dysosmobacter	Dysosmobacter sp017380995
RGVC1101	RGIG6644	Illumina Sequencing	tRNA	Bacteria	Firmicutes_A	Clostridia	Oscillospirales	Oscillospiraceae	Dysosmobacter	Dysosmobacter sp017527365
[truncated: 13,285 more rows]

## Sheet: Table S13
Table S13. Host range of 2,724 vOTUs with multiple predicted host MAGs
RGVC	Num of hosts	Range	Verification
RGVC2	7	Archaea/Bacteria
RGVC5	4	Family
RGVC16	2	Family
RGVC22	4	Order
RGVC29	3	Order
RGVC31	2	Class
RGVC37	4	Order
RGVC39	3	Class
RGVC40	2	Family
RGVC42	8	Family
RGVC45	7	Class
RGVC46	2	Archaea/Bacteria
RGVC49	2	Order
RGVC51	8	Archaea/Bacteria
RGVC52	2	Family
RGVC53	8	Order
RGVC56	15	Class
RGVC62	8	Order
RGVC64	8	Class
RGVC65	3	Genus
RGVC66	2	Family
RGVC74	6	Family	iPHoP
RGVC75	2	Order
RGVC76	2	Genus	iPHoP
RGVC82	6	Order
RGVC83	5	Order
RGVC84	7	Genus
RGVC85	3	Family
RGVC90	2	Family
RGVC92	3	Family
RGVC96	2	Family
RGVC97	8	Class
RGVC98	5	Family
RGVC100	5	Family
RGVC107	5	Family
RGVC112	4	Domain
RGVC113	6	Domain
RGVC115	4	Family
RGVC116	10	Domain
RGVC119	11	Order
RGVC125	3	Class
RGVC128	10	Order
RGVC130	2	Archaea/Bacteria
RGVC133	11	Class
RGVC135	6	Family
RGVC136	3	Class
RGVC148	2	Family
RGVC152	7	Family
RGVC155	12	Class
RGVC157	8	Order
RGVC160	3	Family
RGVC162	3	Genus	iPHoP
RGVC164	3	Genus
RGVC165	6	Class
RGVC169	2	Class
RGVC174	4	Family	iPHoP
RGVC178	11	Class
RGVC184	3	Archaea/Bacteria
RGVC188	4	Family
RGVC189	4	Order
RGVC191	6	Class
RGVC197	6	Order
RGVC205	3	Family
RGVC209	5	Family
RGVC215	2	Family
RGVC221	3	Order
RGVC226	5	Class
RGVC229	4	Family
RGVC230	2	Family
RGVC233	5	Class
RGVC234	2	Family
RGVC236	3	Genus	iPHoP
RGVC240	18	Order
RGVC248	2	Domain
RGVC249	8	Class
RGVC250	4	Order
RGVC254	6	Domain
RGVC257	6	Order
RGVC260	5	Order
RGVC262	5	Family
RGVC264	5	Order
RGVC269	2	Genus
RGVC272	4	Order
RGVC273	4	Domain
RGVC276	10	Order
RGVC277	3	Order
RGVC281	11	Class
RGVC282	7	Order
RGVC285	2	Genus
RGVC290	3	Class
RGVC291	2	Family
RGVC292	2	Order
RGVC294	3	Order
RGVC298	4	Class
RGVC300	3	Class
RGVC303	10	Domain
RGVC304	6	Family
RGVC306	3	Family
RGVC307	4	Order
RGVC311	8	Order
RGVC313	3	Genus
RGVC317	4	Class
RGVC321	2	Order
RGVC324	7	Family
RGVC325	9	Order
RGVC326	6	Family	iPHoP
RGVC330	3	Genus
RGVC335	9	Order
RGVC338	4	Family
RGVC343	3	Family	iPHoP
RGVC344	3	Genus	iPHoP
RGVC345	2	Genus	iPHoP
RGVC348	4	Class
RGVC351	3	Archaea/Bacteria
RGVC353	3	Class
RGVC356	2	Order
RGVC358	4	Class
RGVC363	2	Order
RGVC365	2	Order
RGVC367	3	Family	iPHoP
RGVC372	13	Order
RGVC379	5	Domain
RGVC381	3	Family
RGVC383	10	Archaea/Bacteria
RGVC388	3	Family
RGVC391	2	Genus
RGVC392	3	Family
RGVC393	10	Genus	iPHoP
RGVC394	2	Family
RGVC395	2	Archaea/Bacteria
RGVC405	3	Order
RGVC407	7	Archaea/Bacteria
RGVC411	7	Family
RGVC412	3	Domain
RGVC414	9	Archaea/Bacteria
RGVC417	3	Family
RGVC420	4	Class
RGVC421	7	Genus	iPHoP
RGVC425	2	Species
RGVC427	4	Order
RGVC433	2	Family
RGVC434	5	Family
RGVC438	2	Family
RGVC443	10	Domain
RGVC446	2	Order
RGVC447	4	Family
RGVC453	3	Order
RGVC460	13	Family
RGVC464	8	Order
RGVC470	10	Archaea/Bacteria
RGVC472	7	Class
RGVC477	8	Archaea/Bacteria
RGVC485	2	Species
RGVC486	3	Family
RGVC487	3	Family
RGVC492	2	Family	iPHoP
RGVC493	2	Class
RGVC495	3	Family
RGVC497	3	Family
RGVC499	5	Class
RGVC501	5	Family	iPHoP
RGVC511	11	Class
RGVC513	8	Order
RGVC514	4	Family
RGVC516	8	Order
RGVC518	2	Archaea/Bacteria
RGVC521	9	Class
RGVC524	10	Family
RGVC526	3	Family
RGVC527	3	Order
RGVC530	10	Family
RGVC532	2	Archaea/Bacteria
RGVC533	4	Family
RGVC535	11	Class
RGVC539	2	Genus
RGVC544	3	Genus	iPHoP
RGVC550	11	Order
RGVC552	4	Class
RGVC553	2	Family
RGVC557	12	Family	iPHoP
RGVC564	9	Domain
RGVC571	2	Order
RGVC577	2	Genus
RGVC579	8	Class
RGVC585	8	Order	iPHoP
RGVC586	5	Order
RGVC589	2	Class
RGVC592	2	Class
RGVC595	11	Class
RGVC598	5	Class
RGVC599	11	Order
RGVC600	2	Genus	iPHoP
RGVC603	7	Domain
RGVC604	15	Domain
RGVC605	2	Order
RGVC608	2	Genus	iPHoP
RGVC610	2	Family	iPHoP
RGVC614	2	Family
RGVC615	2	Class
RGVC622	8	Family
RGVC626	7	Class
RGVC631	3	Family
RGVC632	6	Archaea/Bacteria
RGVC633	10	Domain
RGVC634	9	Order
RGVC637	2	Genus	iPHoP
RGVC639	4	Class
RGVC640	3	Genus	iPHoP
RGVC644	2	Family
RGVC646	3	Family
RGVC649	3	Genus	iPHoP
RGVC651	10	Order
RGVC653	6	Class
RGVC654	3	Class
RGVC658	5	Order
RGVC661	9	Archaea/Bacteria
RGVC663	5	Archaea/Bacteria
RGVC669	5	Class
RGVC678	6	Domain
RGVC679	6	Family
RGVC682	3	Order
RGVC688	4	Archaea/Bacteria
RGVC692	4	Family
RGVC704	4	Family	iPHoP
RGVC708	9	Order
RGVC714	6	Class
RGVC715	7	Order
RGVC716	4	Order
RGVC725	7	Class
RGVC726	2	Class
RGVC729	12	Family
RGVC731	3	Class
RGVC732	3	Family
RGVC735	2	Order
RGVC736	7	Order
RGVC739	2	Genus
RGVC740	2	Family
RGVC742	13	Class
RGVC745	2	Family
RGVC747	2	Family
RGVC751	5	Family
RGVC756	9	Order
RGVC758	3	Family
RGVC759	6	Family
RGVC760	15	Class
RGVC763	8	Order
RGVC765	10	Family
RGVC768	4	Genus	iPHoP
RGVC774	9	Family
RGVC780	8	Class
RGVC784	3	Family
RGVC786	12	Family
RGVC789	6	Order
RGVC790	5	Family
RGVC794	5	Order
RGVC801	10	Class
RGVC805	2	Genus
RGVC806	2	Family
RGVC808	14	Domain
RGVC815	5	Class	iPHoP
RGVC819	11	Archaea/Bacteria
RGVC821	9	Order
RGVC823	3	Class
RGVC826	7	Genus
RGVC828	3	Order	iPHoP
RGVC829	2	Genus	iPHoP
RGVC830	6	Class
RGVC831	3	Family
RGVC832	3	Order
RGVC833	5	Family
RGVC834	5	Family
RGVC838	12	Family
RGVC840	2	Class
RGVC847	10	Family
RGVC853	9	Order
RGVC855	11	Class
RGVC856	5	Family
RGVC859	4	Family
RGVC863	6	Genus	iPHoP
RGVC866	3	Order
RGVC867	5	Genus	iPHoP
RGVC870	2	Genus
RGVC871	9	Order
RGVC873	2	Class
RGVC875	4	Family	iPHoP
RGVC877	14	Domain
RGVC878	5	Class
RGVC879	5	Order
RGVC880	2	Family
RGVC881	2	Family
RGVC888	11	Class
RGVC890	2	Domain
RGVC893	4	Class
RGVC896	8	Order
RGVC909	6	Family
RGVC912	5	Class
RGVC913	2	Genus
RGVC915	3	Family
RGVC917	7	Order
RGVC921	7	Class
RGVC922	3	Family
RGVC925	4	Family
RGVC927	2	Family
RGVC931	4	Class
RGVC936	12	Class
RGVC937	7	Domain
RGVC939	12	Class
RGVC943	2	Order
RGVC944	2	Order
RGVC945	5	Order
RGVC952	4	Genus	iPHoP
RGVC956	2	Genus	iPHoP
RGVC964	2	Order
RGVC965	6	Family	iPHoP
RGVC969	2	Genus
RGVC970	5	Family
RGVC973	2	Genus	iPHoP
RGVC974	3	Class
RGVC975	4	Family
RGVC978	2	Class
RGVC979	4	Class
RGVC986	2	Order
RGVC988	3	Genus
RGVC991	21	Class
RGVC994	2	Family
RGVC995	12	Archaea/Bacteria
RGVC999	2	Class
RGVC1001	3	Order
RGVC1005	3	Class
RGVC1010	6	Family
RGVC1011	3	Family
RGVC1013	2	Family
RGVC1017	3	Family
RGVC1026	2	Genus
RGVC1028	3	Family
RGVC1029	4	Family
RGVC1031	10	Order
RGVC1032	3	Family
RGVC1034	3	Genus
RGVC1039	2	Genus	iPHoP
RGVC1046	4	Family
RGVC1051	3	Family
RGVC1059	16	Class
RGVC1062	6	Class
RGVC1063	2	Class
RGVC1066	4	Class
RGVC1069	2	Domain	iPHoP
RGVC1070	2	Genus	iPHoP
RGVC1074	2	Order
RGVC1080	6	Domain
RGVC1081	5	Family
RGVC1084	3	Order
RGVC1090	2	Family	iPHoP
RGVC1093	2	Class
RGVC1095	6	Genus	iPHoP
RGVC1096	9	Archaea/Bacteria
RGVC1098	9	Order	iPHoP
RGVC1101	11	Order
RGVC1105	2	Family
RGVC1111	5	Order
RGVC1115	4	Class
RGVC1117	6	Domain
RGVC1120	6	Class
RGVC1123	7	Family
RGVC1124	3	Domain
RGVC1126	11	Genus	iPHoP
RGVC1128	4	Class
RGVC1129	8	Order
RGVC1131	2	Family
RGVC1144	9	Domain
RGVC1146	8	Family
RGVC1147	10	Order
RGVC1149	8	Order
RGVC1151	11	Archaea/Bacteria
RGVC1153	4	Class
RGVC1156	2	Genus	iPHoP
RGVC1158	3	Class
RGVC1160	4	Domain
RGVC1166	6	Genus	iPHoP
RGVC1172	2	Family
RGVC1173	4	Family
RGVC1174	2	Genus	iPHoP
RGVC1178	7	Order
RGVC1181	5	Genus	iPHoP
RGVC1184	2	Order
RGVC1187	2	Genus
RGVC1188	18	Order
RGVC1189	9	Order
RGVC1193	5	Family
RGVC1194	11	Class
RGVC1198	3	Family
RGVC1205	5	Class
RGVC1210	4	Class
RGVC1212	6	Class
RGVC1220	4	Family
RGVC1221	2	Order
RGVC1227	5	Class
RGVC1228	2	Genus	iPHoP
RGVC1233	2	Family	iPHoP
RGVC1234	7	Order
RGVC1240	2	Family
RGVC1241	9	Family
RGVC1245	5	Family
RGVC1256	8	Order
RGVC1264	10	Class
RGVC1265	4	Class
RGVC1271	4	Order
RGVC1278	4	Class
RGVC1280	5	Family	iPHoP
RGVC1281	5	Domain
RGVC1282	7	Archaea/Bacteria
RGVC1287	5	Class
RGVC1296	2	Class
RGVC1297	5	Genus
RGVC1301	9	Class
RGVC1303	2	Family
RGVC1306	4	Class
RGVC1308	6	Family
RGVC1309	6	Domain
RGVC1311	6	Genus	iPHoP
RGVC1313	7	Class
RGVC1316	5	Order
RGVC1318	5	Family
RGVC1323	8	Class
RGVC1335	2	Archaea/Bacteria
RGVC1337	6	Order
RGVC1343	7	Genus
RGVC1347	6	Order
RGVC1349	4	Family
RGVC1350	5	Family
RGVC1354	2	Family
RGVC1367	2	Genus	iPHoP
RGVC1371	4	Class
RGVC1373	5	Family
RGVC1378	5	Genus	iPHoP
RGVC1380	7	Class
RGVC1388	2	Order
RGVC1392	3	Class
RGVC1395	2	Family
RGVC1398	2	Genus	iPHoP
RGVC1401	3	Family
RGVC1403	2	Genus	iPHoP
RGVC1405	3	Class
RGVC1408	2	Genus	iPHoP
RGVC1412	3	Family
RGVC1415	14	Order
RGVC1417	7	Family	iPHoP
RGVC1420	2	Genus	iPHoP
RGVC1422	2	Genus	iPHoP
RGVC1427	5	Family
RGVC1430	3	Order
RGVC1436	2	Class
RGVC1438	4	Family	iPHoP
RGVC1439	11	Order
RGVC1444	3	Species
RGVC1446	3	Genus
RGVC1451	7	Order
RGVC1453	6	Archaea/Bacteria
RGVC1458	4	Family
RGVC1462	4	Family
RGVC1466	2	Order
RGVC1470	7	Family
RGVC1473	8	Class
RGVC1479	7	Order
RGVC1480	4	Family
RGVC1481	2	Order
RGVC1485	3	Family
RGVC1487	6	Order
RGVC1489	4	Class
RGVC1493	7	Class
RGVC1507	7	Order
RGVC1510	11	Archaea/Bacteria
RGVC1511	2	Genus	iPHoP
RGVC1513	4	Family
RGVC1516	4	Order
RGVC1517	13	Order
RGVC1518	5	Class
RGVC1522	2	Order
RGVC1523	3	Order
RGVC1530	10	Family
RGVC1535	10	Order
RGVC1536	3	Order
RGVC1537	15	Class
RGVC1538	10	Domain
RGVC1542	2	Genus
RGVC1554	2	Family
RGVC1555	12	Order
RGVC1557	8	Order
RGVC1560	7	Order
RGVC1561	2	Genus
RGVC1564	2	Family
RGVC1565	3	Family
RGVC1568	2	Genus
RGVC1572	12	Archaea/Bacteria
RGVC1575	3	Order
RGVC1577	2	Class
RGVC1580	2	Family
RGVC1589	7	Order
RGVC1590	3	Genus	iPHoP
RGVC1592	10	Class
RGVC1596	4	Order
RGVC1597	8	Class
RGVC1599	2	Order
RGVC1600	4	Genus
RGVC1604	2	Family	iPHoP
RGVC1606	4	Order
RGVC1609	3	Family
RGVC1611	2	Class
RGVC1618	2	Class
RGVC1620	2	Order
RGVC1621	4	Order
RGVC1632	8	Order
RGVC1633	7	Genus	iPHoP
RGVC1634	4	Family
RGVC1636	11	Archaea/Bacteria
RGVC1642	10	Order
RGVC1644	5	Genus
RGVC1647	4	Family
RGVC1656	13	Order
RGVC1657	2	Class
RGVC1658	4	Family
RGVC1660	3	Family
RGVC1662	2	Family
RGVC1668	3	Family
RGVC1673	4	Order
RGVC1675	6	Order
RGVC1676	8	Class
RGVC1685	2	Order
RGVC1689	5	Class
RGVC1692	4	Class
RGVC1695	5	Order
RGVC1697	2	Family
RGVC1704	4	Family
RGVC1706	3	Class
RGVC1710	4	Class
RGVC1715	2	Genus
RGVC1716	6	Family
RGVC1723	11	Order
RGVC1730	8	Family
RGVC1733	2	Family
RGVC1741	17	Class
RGVC1742	2	Family
RGVC1746	16	Class
RGVC1747	14	Class
RGVC1750	7	Order
RGVC1756	5	Family
RGVC1763	13	Archaea/Bacteria
RGVC1776	8	Archaea/Bacteria
RGVC1779	2	Genus
RGVC1780	5	Family
RGVC1787	2	Family
RGVC1795	2	Class
RGVC1797	2	Family
RGVC1798	2	Family
RGVC1799	3	Order	iPHoP
RGVC1810	4	Family
RGVC1812	14	Class
RGVC1813	5	Family
RGVC1815	3	Class
RGVC1817	2	Genus
RGVC1818	16	Class
RGVC1821	7	Family
RGVC1822	9	Order
RGVC1827	4	Order
RGVC1829	2	Genus
RGVC1830	4	Genus	iPHoP
RGVC1846	6	Family
RGVC1850	3	Order
RGVC1852	10	Family	iPHoP
RGVC1854	4	Class
RGVC1855	7	Archaea/Bacteria
RGVC1859	8	Family
RGVC1864	8	Order
RGVC1866	3	Family
RGVC1868	6	Class
RGVC1878	2	Class
RGVC1879	9	Archaea/Bacteria
RGVC1882	3	Genus
RGVC1883	3	Family
RGVC1890	13	Domain
RGVC1891	2	Order
RGVC1894	2	Family
RGVC1912	4	Family
RGVC1914	9	Class
RGVC1916	5	Archaea/Bacteria
RGVC1921	2	Species
RGVC1922	2	Order
RGVC1925	9	Family
RGVC1930	5	Class
RGVC1931	3	Class
RGVC1932	2	Family
RGVC1935	5	Class
RGVC1939	2	Family	iPHoP
RGVC1941	2	Order
RGVC1943	3	Order
RGVC1948	2	Class
RGVC1950	3	Class
RGVC1953	3	Class
RGVC1955	3	Family
RGVC1958	4	Archaea/Bacteria
RGVC1959	9	Class
RGVC1961	12	Class
RGVC1962	2	Species
RGVC1973	9	Family
RGVC1982	5	Order
RGVC1991	3	Genus
RGVC1992	4	Family	iPHoP
RGVC1998	5	Class
RGVC1999	10	Order
RGVC2003	5	Family
RGVC2005	2	Family	iPHoP
RGVC2007	2	Genus	iPHoP
RGVC2010	3	Order
RGVC2011	4	Genus
RGVC2015	7	Class
RGVC2017	2	Class
RGVC2018	11	Domain
RGVC2022	6	Class
RGVC2025	17	Order
RGVC2026	4	Family
RGVC2031	7	Order
RGVC2036	6	Order
RGVC2037	10	Archaea/Bacteria
RGVC2043	9	Class
RGVC2048	2	Class
RGVC2049	2	Family
RGVC2053	5	Class
RGVC2054	2	Genus
RGVC2055	10	Family	iPHoP
RGVC2057	11	Order
RGVC2064	2	Class
RGVC2065	7	Order	iPHoP
RGVC2066	2	Family	iPHoP
RGVC2067	3	Class
RGVC2074	3	Order
RGVC2078	8	Class
RGVC2082	8	Order
RGVC2085	5	Family
RGVC2090	3	Family	iPHoP
RGVC2091	11	Archaea/Bacteria
RGVC2093	4	Order
RGVC2099	2	Class
RGVC2102	5	Family
RGVC2115	2	Family
RGVC2133	2	Family
RGVC2138	3	Order
RGVC2142	3	Genus	iPHoP
RGVC2145	2	Species
RGVC2146	5	Order
RGVC2151	8	Archaea/Bacteria
RGVC2152	6	Class
RGVC2153	4	Family
RGVC2155	3	Family
RGVC2170	3	Family
RGVC2174	4	Family
RGVC2179	12	Domain
RGVC2187	2	Family
RGVC2189	7	Family
RGVC2192	12	Class
RGVC2194	6	Order
RGVC2200	7	Family
RGVC2204	6	Class
RGVC2206	11	Class
RGVC2210	4	Family
RGVC2218	7	Family
RGVC2228	5	Class
RGVC2239	3	Family
RGVC2243	8	Family
RGVC2244	2	Order
RGVC2245	3	Class
RGVC2250	2	Class
RGVC2258	4	Family
RGVC2263	7	Order
RGVC2265	8	Class
RGVC2270	3	Class
RGVC2276	6	Order
RGVC2284	3	Order
RGVC2289	4	Genus	iPHoP
RGVC2297	9	Archaea/Bacteria
RGVC2298	2	Species
RGVC2300	5	Class
RGVC2302	2	Genus	iPHoP
RGVC2303	14	Archaea/Bacteria
RGVC2314	2	Family
RGVC2327	7	Archaea/Bacteria
RGVC2330	2	Class
RGVC2331	11	Archaea/Bacteria
RGVC2338	2	Genus
RGVC2342	2	Order
RGVC2347	4	Family
RGVC2352	9	Domain	iPHoP
RGVC2372	2	Family
RGVC2373	2	Family
RGVC2375	3	Order
RGVC2378	2	Family
RGVC2383	2	Order
RGVC2385	3	Genus
RGVC2386	12	Family
RGVC2387	15	Archaea/Bacteria
RGVC2388	2	Genus
RGVC2392	4	Order
RGVC2401	4	Genus
RGVC2404	10	Class
RGVC2405	14	Class
RGVC2406	2	Domain
RGVC2408	3	Family
RGVC2409	3	Class
RGVC2413	7	Family
RGVC2414	2	Class
RGVC2415	3	Family
RGVC2418	4	Family
RGVC2420	2	Domain
RGVC2425	14	Class
RGVC2429	3	Family
RGVC2438	4	Domain
RGVC2453	9	Archaea/Bacteria
RGVC2455	7	Domain
RGVC2457	5	Order
RGVC2458	5	Order
RGVC2466	3	Domain
RGVC2479	9	Archaea/Bacteria
RGVC2480	2	Family
RGVC2494	8	Class
RGVC2495	12	Archaea/Bacteria
RGVC2498	9	Archaea/Bacteria
RGVC2506	2	Order
RGVC2507	3	Family
RGVC2508	4	Order
RGVC2512	2	Family	iPHoP
RGVC2516	2	Family	iPHoP
RGVC2518	11	Class
RGVC2523	2	Family
RGVC2525	3	Class
RGVC2531	2	Family
RGVC2535	7	Genus
RGVC2536	3	Class
RGVC2540	2	Genus
RGVC2542	2	Class
RGVC2550	3	Order
RGVC2551	4	Order
RGVC2554	3	Order
RGVC2555	5	Order
RGVC2558	8	Class
RGVC2566	2	Class
RGVC2569	5	Class
RGVC2577	2	Family
RGVC2578	2	Order
RGVC2582	8	Family
RGVC2593	6	Class
RGVC2596	6	Genus	iPHoP
RGVC2598	2	Genus
RGVC2600	8	Family
RGVC2602	2	Species
RGVC2603	2	Domain
RGVC2606	13	Domain
RGVC2608	2	Species
RGVC2612	8	Order
RGVC2613	2	Family
RGVC2621	5	Family	iPHoP
RGVC2623	7	Class
RGVC2630	22	Class
RGVC2636	4	Family
RGVC2637	5	Class
RGVC2639	4	Family
RGVC2645	3	Order
RGVC2649	4	Order
RGVC2657	10	Class
RGVC2660	5	Order
RGVC2666	5	Family
RGVC2670	8	Class
RGVC2678	4	Order
RGVC2679	6	Genus	iPHoP
RGVC2683	10	Order
RGVC2686	2	Family
RGVC2696	11	Class
RGVC2703	2	Class
RGVC2706	2	Order
RGVC2709	2	Family
RGVC2719	3	Family
RGVC2726	2	Domain
RGVC2732	3	Family
RGVC2736	6	Order
RGVC2745	13	Archaea/Bacteria
RGVC2746	2	Class
RGVC2750	13	Archaea/Bacteria
RGVC2754	9	Class
RGVC2755	9	Archaea/Bacteria
RGVC2756	2	Order
RGVC2758	6	Genus	iPHoP
RGVC2759	3	Genus
RGVC2763	3	Genus	iPHoP
RGVC2765	3	Family
RGVC2779	2	Family
RGVC2785	4	Genus	iPHoP
RGVC2786	7	Archaea/Bacteria
RGVC2792	4	Class
RGVC2795	2	Archaea/Bacteria
RGVC2796	3	Order
RGVC2798	7	Genus
RGVC2801	9	Order	CrisprOpenDB
RGVC2812	8	Family	iPHoP
RGVC2817	4	Order
RGVC2821	11	Order
RGVC2828	3	Order
RGVC2829	2	Genus
RGVC2836	16	Class
RGVC2838	3	Class
RGVC2837	2	Family
RGVC2840	3	Genus	iPHoP
RGVC2849	2	Family
RGVC2851	10	Genus
RGVC2856	2	Family
RGVC2864	2	Family
RGVC2865	3	Order
RGVC2871	5	Class
RGVC2882	3	Class
RGVC2884	2	Class
RGVC2889	11	Genus	iPHoP
RGVC2892	3	Class
RGVC2894	8	Class
RGVC2900	6	Order
RGVC2914	12	Class
RGVC2916	5	Family
RGVC2928	5	Family
RGVC2931	2	Species
RGVC2932	5	Order
RGVC2936	2	Genus
RGVC2940	8	Order
RGVC2943	2	Order
RGVC2944	4	Class
RGVC2945	4	Class
RGVC2951	18	Archaea/Bacteria
RGVC2954	3	Order
RGVC2957	4	Genus
RGVC2965	3	Archaea/Bacteria
RGVC2968	3	Genus	iPHoP
RGVC2969	3	Class
RGVC2972	2	Order
RGVC2983	2	Genus	iPHoP
RGVC2988	3	Genus
RGVC2991	2	Species
RGVC2994	13	Family
RGVC2999	2	Family
RGVC3003	6	Order
RGVC3004	5	Family
RGVC3007	2	Family
RGVC3008	8	Archaea/Bacteria
RGVC3009	3	Order
RGVC3011	7	Class
RGVC3015	2	Order
RGVC3018	5	Class
RGVC3028	3	Class
RGVC3030	6	Class
RGVC3035	3	Genus
RGVC3039	6	Class
RGVC3040	2	Order
RGVC3044	2	Family
RGVC3045	6	Order
RGVC3047	5	Order
RGVC3051	8	Order
RGVC3053	9	Order
RGVC3079	16	Family
RGVC3087	5	Family
RGVC3088	2	Family
RGVC3092	5	Archaea/Bacteria
RGVC3095	8	Order
RGVC3115	2	Genus
RGVC3121	8	Domain
RGVC3129	2	Genus	iPHoP
RGVC3137	3	Family
RGVC3144	4	Class
RGVC3147	6	Archaea/Bacteria
RGVC3149	5	Family
RGVC3154	2	Domain
RGVC3159	9	Order
RGVC3160	2	Family
RGVC3166	4	Family
RGVC3167	17	Class
RGVC3171	2	Order
RGVC3172	5	Domain
RGVC3181	10	Order
RGVC3192	7	Genus
RGVC3193	3	Family
RGVC3196	3	Family
RGVC3201	7	Class
RGVC3216	5	Family
RGVC3218	4	Order
RGVC3219	3	Order	iPHoP
RGVC3221	4	Class
RGVC3233	3	Class
RGVC3235	4	Family	iPHoP
RGVC3241	5	Order
RGVC3244	6	Archaea/Bacteria
RGVC3249	5	Order
RGVC3255	2	Family
RGVC3259	2	Order
RGVC3260	2	Genus	iPHoP
RGVC3262	6	Family
RGVC3270	4	Order	iPHoP
RGVC3283	11	Family	iPHoP
RGVC3285	3	Order
RGVC3287	5	Archaea/Bacteria
RGVC3292	2	Family
RGVC3308	6	Class
RGVC3314	3	Class
RGVC3321	5	Order
RGVC3327	10	Order
RGVC3332	11	Order
RGVC3343	5	Order
RGVC3348	3	Class
RGVC3352	8	Class
RGVC3362	2	Order
RGVC3373	2	Genus	iPHoP
RGVC3375	3	Class
RGVC3378	4	Class
RGVC3381	3	Class
RGVC3383	4	Order	iPHoP
RGVC3386	9	Family
RGVC3399	6	Order
RGVC3404	2	Class
RGVC3406	10	Domain
RGVC3414	5	Family	iPHoP
RGVC3416	4	Family
RGVC3446	6	Order
RGVC3450	4	Class
RGVC3480	4	Class
RGVC3482	6	Class
RGVC3483	2	Archaea/Bacteria
RGVC3489	4	Family
RGVC3493	5	Family
RGVC3503	2	Family
RGVC3511	4	Order	iPHoP
RGVC3515	2	Family
RGVC3517	3	Class
RGVC3525	2	Family
RGVC3526	4	Family
RGVC3532	13	Archaea/Bacteria
RGVC3536	2	Genus
RGVC3540	6	Archaea/Bacteria
RGVC3541	5	Class
RGVC3543	8	Family
RGVC3551	2	Family
RGVC3561	2	Family
RGVC3564	2	Class
RGVC3565	5	Order
RGVC3572	5	Genus	iPHoP
RGVC3575	15	Archaea/Bacteria
RGVC3576	8	Family
RGVC3577	16	Class
RGVC3584	4	Family
RGVC3592	6	Archaea/Bacteria
RGVC3616	5	Domain
RGVC3629	8	Class
RGVC3630	6	Domain
RGVC3632	2	Order
RGVC3648	3	Class
RGVC3662	4	Genus	iPHoP
RGVC3663	9	Class
RGVC3679	7	Family
RGVC3681	2	Order
RGVC3693	13	Class
RGVC3698	2	Family
RGVC3704	2	Order
RGVC3712	2	Order
RGVC3720	3	Class
RGVC3727	6	Class
RGVC3729	5	Class
RGVC3742	2	Order
RGVC3750	2	Family
RGVC3760	5	Class
RGVC3770	2	Order
RGVC3776	6	Genus
RGVC3779	6	Family	iPHoP
RGVC3785	10	Domain
RGVC3813	3	Species
RGVC3816	2	Genus
RGVC3834	14	Archaea/Bacteria
RGVC3837	3	Domain
RGVC3839	4	Genus	iPHoP
RGVC3841	8	Family
RGVC3848	4	Order
RGVC3859	5	Family
RGVC3861	2	Genus	iPHoP
RGVC3862	3	Class
RGVC3865	4	Order
RGVC3882	3	Family
RGVC3890	2	Genus	iPHoP
RGVC3912	6	Family
RGVC3918	12	Class
RGVC3920	2	Genus
RGVC3937	4	Genus	iPHoP
RGVC3949	2	Order
RGVC3961	12	Class
RGVC3962	3	Domain
RGVC3964	6	Class
RGVC3969	2	Family
RGVC3975	2	Family	iPHoP
RGVC3991	7	Family	iPHoP
RGVC4007	7	Domain
RGVC4019	4	Family
RGVC4021	3	Genus
RGVC4022	5	Family
RGVC4036	3	Family
RGVC4045	5	Genus
RGVC4065	2	Genus	iPHoP
RGVC4075	2	Family
RGVC4083	2	Species
RGVC4087	7	Family	iPHoP
RGVC4088	2	Family	iPHoP
RGVC4093	3	Class
RGVC4099	5	Class
RGVC4105	3	Order
RGVC4118	6	Genus
RGVC4121	6	Class
RGVC4135	2	Genus	iPHoP
RGVC4140	11	Archaea/Bacteria
RGVC4147	3	Family	iPHoP
RGVC4150	3	Family
RGVC4165	2	Genus	iPHoP
RGVC4168	14	Archaea/Bacteria
RGVC4192	2	Species
RGVC4200	5	Domain
RGVC4207	4	Family
RGVC4208	3	Genus	iPHoP
RGVC4210	13	Class
RGVC4235	9	Family
RGVC4246	4	Family
RGVC4260	4	Class
RGVC4276	10	Genus	iPHoP
RGVC4292	3	Family	iPHoP
RGVC4306	2	Order
RGVC4315	3	Domain
RGVC4318	2	Family
RGVC4324	6	Order
RGVC4343	3	Genus	iPHoP
RGVC4348	4	Class
RGVC4379	3	Order
RGVC4386	11	Class
RGVC4394	4	Class
RGVC4395	4	Archaea/Bacteria
RGVC4403	4	Class
RGVC4409	6	Class
RGVC4421	10	Class
RGVC4432	5	Archaea/Bacteria
RGVC4441	8	Archaea/Bacteria
RGVC4445	2	Class
RGVC4456	2	Genus	iPHoP
RGVC4458	13	Domain
RGVC4459	3	Genus	iPHoP
RGVC4461	14	Order
RGVC4470	3	Family
RGVC4475	3	Family
RGVC4479	3	Family	iPHoP
RGVC4488	6	Domain
RGVC4491	7	Archaea/Bacteria
RGVC4492	2	Order
RGVC4499	3	Class
RGVC4501	2	Order
RGVC4504	6	Order
RGVC4508	4	Class
RGVC4509	2	Family
RGVC4511	2	Family
RGVC4518	2	Genus	iPHoP
RGVC4523	3	Class
RGVC4527	6	Class
RGVC4532	3	Genus
RGVC4540	5	Family
RGVC4548	2	Genus
RGVC4579	5	Family
RGVC4589	7	Family
RGVC4601	3	Genus	iPHoP
RGVC4610	9	Family
RGVC4616	14	Class
RGVC4619	5	Order
RGVC4622	3	Genus	iPHoP
RGVC4629	3	Order
RGVC4630	7	Domain
RGVC4632	13	Order
RGVC4634	3	Order
RGVC4640	16	Order
RGVC4644	3	Class	iPHoP
RGVC4651	4	Order
RGVC4652	5	Genus	iPHoP
RGVC4654	4	Family
RGVC4656	3	Genus
RGVC4659	11	Class
RGVC4662	2	Class
RGVC4682	11	Class
RGVC4689	4	Order
RGVC4690	14	Archaea/Bacteria
RGVC4699	6	Order
RGVC4714	11	Class
RGVC4722	4	Class
RGVC4724	11	Family
RGVC4728	7	Domain
RGVC4729	7	Genus	iPHoP
RGVC4736	2	Order
RGVC4743	2	Family
RGVC4744	3	Order
RGVC4745	6	Class
RGVC4753	4	Family
RGVC4756	2	Family	iPHoP
RGVC4758	5	Family
RGVC4762	4	Family
RGVC4763	2	Domain
RGVC4768	5	Domain
RGVC4770	6	Class
RGVC4774	2	Family	iPHoP
RGVC4778	4	Order
RGVC4779	8	Order
RGVC4783	2	Species
RGVC4787	3	Family
RGVC4794	8	Class
RGVC4800	7	Class
RGVC4810	3	Class
RGVC4813	3	Order
RGVC4815	2	Order
RGVC4818	2	Family
RGVC4825	2	Genus	iPHoP
RGVC4830	14	Class
RGVC4834	3	Family
RGVC4835	9	Family
RGVC4839	3	Domain
RGVC4853	3	Genus	iPHoP
RGVC4861	8	Archaea/Bacteria
RGVC4865	4	Genus
RGVC4866	4	Class
RGVC4867	3	Order
RGVC4875	11	Class
RGVC4878	2	Class
RGVC4883	5	Family
RGVC4892	2	Family
RGVC4893	7	Domain
RGVC4898	9	Family
RGVC4903	4	Order	iPHoP
RGVC4907	11	Class
RGVC4908	7	Genus
RGVC4910	5	Family
RGVC4915	3	Order
RGVC4917	2	Family
RGVC4920	2	Family
RGVC4921	10	Class
RGVC4923	4	Class
RGVC4926	3	Genus	iPHoP
RGVC4934	4	Family
RGVC4938	4	Class
RGVC4940	7	Family
RGVC4947	3	Family
RGVC4949	3	Genus
RGVC4954	2	Family
RGVC4956	11	Family
RGVC4958	12	Domain
RGVC4961	4	Family	iPHoP
RGVC4962	2	Species
RGVC4966	3	Archaea/Bacteria
RGVC4969	7	Family
RGVC4975	2	Class
RGVC4976	5	Family
RGVC4978	3	Genus
RGVC4980	12	Domain
RGVC4984	2	Class
RGVC4985	4	Order
RGVC4993	2	Family
RGVC4995	3	Order
RGVC4996	3	Family
RGVC5000	3	Class
RGVC5004	10	Family
RGVC5011	10	Class
RGVC5012	3	Order
RGVC5015	7	Class
RGVC5021	17	Domain
RGVC5022	5	Order
RGVC5024	3	Family
RGVC5025	6	Order
RGVC5030	2	Genus
RGVC5038	3	Order
RGVC5043	2	Genus	iPHoP
RGVC5046	2	Family
RGVC5048	2	Domain
RGVC5054	4	Order	iPHoP
RGVC5055	6	Family
RGVC5057	14	Class
RGVC5059	2	Family
RGVC5063	8	Order
RGVC5064	3	Order
RGVC5066	2	Order
RGVC5069	2	Family	iPHoP
RGVC5073	6	Class
RGVC5081	4	Genus	iPHoP
RGVC5082	6	Family
RGVC5085	12	Order
RGVC5091	2	Family
RGVC5096	2	Class
RGVC5098	10	Class
RGVC5103	4	Genus	iPHoP
RGVC5106	4	Domain
RGVC5107	9	Domain
RGVC5111	2	Class
RGVC5115	2	Family
RGVC5117	8	Class
RGVC5130	2	Genus	iPHoP
RGVC5132	2	Genus	iPHoP
RGVC5133	9	Class
RGVC5144	11	Order
RGVC5147	4	Domain
RGVC5148	6	Class
RGVC5151	2	Family	iPHoP
RGVC5154	3	Family
RGVC5155	4	Family
RGVC5163	4	Family
RGVC5166	2	Order
RGVC5168	2	Class
RGVC5170	2	Family
RGVC5176	2	Order
RGVC5178	3	Family	iPHoP
RGVC5179	3	Order
RGVC5182	2	Genus
RGVC5185	4	Class
RGVC5187	2	Genus	iPHoP
RGVC5190	2	Archaea/Bacteria
RGVC5191	2	Genus
RGVC5192	8	Domain
RGVC5195	12	Archaea/Bacteria
RGVC5196	4	Class
RGVC5204	2	Genus	iPHoP
RGVC5205	2	Family	iPHoP
RGVC5207	4	Genus	iPHoP
RGVC5209	3	Domain
RGVC5212	3	Family
RGVC5214	6	Family
RGVC5218	2	Class
RGVC5219	2	Order
RGVC5222	2	Genus
RGVC5233	6	Genus
RGVC5236	8	Family
RGVC5238	8	Family
RGVC5240	4	Order
RGVC5254	2	Order
RGVC5255	4	Class
RGVC5446	3	Family
RGVC5601	2	Order
RGVC5789	3	Genus	iPHoP
RGVC6295	2	Family
RGVC6337	2	Genus	iPHoP
RGVC6371	2	Genus
RGVC6632	3	Order
RGVC6745	3	Family	iPHoP
RGVC6749	2	Genus	iPHoP
RGVC7081	5	Order
RGVC7213	3	Species
RGVC7410	4	Genus	iPHoP
RGVC7629	3	Order
RGVC7682	2	Order
RGVC7707	3	Family
RGVC7780	3	Archaea/Bacteria
RGVC7841	2	Order
RGVC7890	4	Genus	iPHoP
RGVC8985	2	Species
RGVC9453	4	Genus
RGVC10882	3	Species
RGVC10972	2	Species
RGVC11106	2	Genus	iPHoP
RGVC11122	2	Class
RGVC11153	2	Family
RGVC11182	2	Genus
RGVC11248	10	Family
RGVC11260	4	Genus	iPHoP
RGVC11342	2	Genus	CrisprOpenDB
RGVC11355	3	Order
RGVC11402	2	Species
RGVC11425	2	Genus	iPHoP
RGVC11430	3	Genus	iPHoP
RGVC11435	7	Order
RGVC11450	3	Genus	iPHoP
RGVC11466	2	Family
RGVC11478	2	Genus	iPHoP
RGVC11505	3	Genus	iPHoP
RGVC11513	3	Genus	iPHoP
RGVC11522	2	Domain	iPHoP
RGVC11565	9	Class
RGVC11567	3	Genus	iPHoP
RGVC11592	11	Order
RGVC11596	7	Family
RGVC11606	3	Genus	iPHoP
RGVC11616	3	Genus	iPHoP
RGVC11635	2	Genus	iPHoP
RGVC11687	2	Family
RGVC11799	7	Family
RGVC11820	2	Genus	iPHoP
RGVC11837	4	Genus	iPHoP
RGVC11879	2	Genus
RGVC11880	14	Family
RGVC11939	2	Family
RGVC12004	2	Genus
RGVC12007	10	Family
RGVC12025	2	Order
RGVC12138	7	Order
RGVC12160	3	Genus
RGVC12186	2	Domain
RGVC12216	5	Family
RGVC12225	4	Order
RGVC12228	2	Species
RGVC12292	7	Order
RGVC12335	6	Family
RGVC12353	6	Family
RGVC12360	2	Genus	iPHoP
RGVC12398	2	Order
RGVC12460	2	Genus	iPHoP
RGVC12475	23	Family
RGVC12656	2	Family
RGVC12670	5	Genus	iPHoP
RGVC12749	8	Domain
RGVC12821	4	Genus	iPHoP
RGVC12864	12	Family
RGVC12921	8	Genus	iPHoP
RGVC12957	3	Archaea/Bacteria
RGVC13123	3	Genus
RGVC13171	3	Genus	iPHoP
RGVC13181	5	Family
RGVC13222	5	Archaea/Bacteria
RGVC13236	5	Genus
RGVC13750	2	Domain
RGVC13877	2	Genus	iPHoP
RGVC13967	3	Family
RGVC13973	3	Family
RGVC13982	2	Genus	iPHoP
RGVC14099	3	Genus	iPHoP
RGVC14140	2	Domain
RGVC14439	2	Class
RGVC14603	2	Genus
RGVC14680	3	Order
RGVC14723	2	Archaea/Bacteria
RGVC15059	12	Family
RGVC15143	13	Order
RGVC15187	2	Domain
RGVC15218	3	Genus	iPHoP
RGVC15397	2	Genus	iPHoP
RGVC15405	19	Family	iPHoP
RGVC15426	7	Family
RGVC15495	2	Species
RGVC15739	2	Genus
RGVC15882	3	Genus
RGVC16004	2	Genus
RGVC16560	2	Archaea/Bacteria
RGVC16624	4	Genus	iPHoP
RGVC16688	6	Genus	iPHoP
RGVC16692	6	Genus
RGVC16698	20	Genus
RGVC16705	7	Genus	iPHoP
RGVC16712	11	Archaea/Bacteria
RGVC16713	9	Class
RGVC16717	2	Genus	iPHoP
RGVC16718	3	Genus	iPHoP
RGVC16730	4	Archaea/Bacteria
RGVC16737	3	Genus
RGVC16739	7	Genus	CrisprOpenDB
RGVC16741	3	Family
RGVC16755	3	Family
RGVC16756	6	Order
RGVC16765	9	Family
RGVC16766	4	Genus
RGVC16769	9	Genus	iPHoP
RGVC16781	14	Family
RGVC16785	9	Class
RGVC16787	5	Family
RGVC16794	9	Family
RGVC16806	8	Order
RGVC16811	4	Order
RGVC16812	2	Class
RGVC16813	4	Genus	iPHoP
RGVC16814	2	Family
RGVC16832	2	Genus
RGVC16835	14	Order
RGVC16839	8	Family
RGVC16848	3	Family
RGVC16849	5	Family
RGVC16858	2	Family
RGVC16862	9	Family
RGVC16865	2	Genus
RGVC16868	10	Order
RGVC16876	4	Genus
RGVC16877	4	Class
RGVC16889	9	Genus	iPHoP
RGVC16899	6	Family
RGVC16903	2	Family
RGVC16905	2	Order	iPHoP
RGVC16908	6	Genus	iPHoP
RGVC16922	12	Order
RGVC16926	2	Family
RGVC16942	2	Order
RGVC16947	3	Genus	iPHoP
RGVC16949	6	Class
RGVC16970	2	Genus	iPHoP
RGVC16976	3	Domain
RGVC16979	2	Domain
RGVC16987	5	Genus
RGVC16988	9	Genus	iPHoP
RGVC16989	2	Archaea/Bacteria
RGVC16998	2	Genus
RGVC17013	11	Order
RGVC17015	10	Order
RGVC17017	7	Genus
RGVC17021	9	Genus
RGVC17025	13	Order
RGVC17027	9	Order
RGVC17033	7	Order
RGVC17050	3	Genus
RGVC17051	2	Genus	CrisprOpenDB, iPHoP
RGVC17060	5	Genus	iPHoP
RGVC17079	5	Domain
RGVC17084	14	Family
RGVC17097	5	Order
RGVC17119	2	Genus
RGVC17123	2	Genus	iPHoP
RGVC17130	3	Genus
RGVC17188	3	Genus	iPHoP
RGVC17194	3	Family
RGVC17199	7	Order
RGVC17204	8	Genus
RGVC17206	7	Genus	iPHoP
RGVC17210	4	Genus	iPHoP
RGVC17212	5	Order
RGVC17214	2	Family
RGVC17216	3	Family	iPHoP
RGVC17217	2	Genus
RGVC17220	2	Domain
RGVC17222	4	Order
RGVC17231	7	Family
RGVC17234	4	Genus	iPHoP
RGVC17235	9	Genus
RGVC17240	12	Domain
RGVC17242	2	Order
RGVC17243	5	Order
RGVC17244	8	Order
RGVC17245	4	Genus
RGVC17246	6	Family
RGVC17254	10	Order
RGVC17258	7	Family
RGVC17265	3	Class
RGVC17272	3	Genus
RGVC17273	6	Domain
RGVC17276	3	Family
RGVC17278	10	Order
RGVC17282	2	Family
RGVC17283	9	Order
RGVC17284	6	Order
RGVC17287	3	Class	iPHoP
RGVC17289	3	Genus
RGVC17296	2	Class
RGVC17299	21	Family
RGVC17304	4	Family
RGVC17306	2	Family
RGVC17309	4	Archaea/Bacteria
RGVC17319	4	Family
RGVC17325	5	Family
RGVC17330	2	Family
RGVC17338	4	Genus	iPHoP
RGVC17347	6	Family
RGVC17357	2	Domain
RGVC17360	8	Order
RGVC17362	8	Archaea/Bacteria
RGVC17363	8	Genus	iPHoP
RGVC17368	4	Order
RGVC17376	2	Family
RGVC17377	4	Order
RGVC17378	4	Genus	iPHoP
RGVC17382	2	Family
RGVC17392	6	Family	iPHoP
RGVC17397	9	Order
RGVC17398	4	Order
RGVC17399	24	Archaea/Bacteria
RGVC17401	5	Genus	iPHoP
RGVC17404	8	Genus
RGVC17427	6	Family
RGVC17428	2	Genus
RGVC17429	7	Order
RGVC17435	2	Genus	iPHoP
RGVC17438	10	Genus	iPHoP
RGVC17448	2	Species
RGVC17449	3	Family
RGVC17450	4	Order
RGVC17485	2	Genus
RGVC17503	2	Species
RGVC17530	2	Genus	iPHoP
RGVC17544	2	Genus	iPHoP
RGVC17559	2	Genus	iPHoP
RGVC17567	3	Genus
RGVC17577	2	Genus	iPHoP
RGVC17583	5	Genus	iPHoP
RGVC17590	4	Genus	iPHoP
RGVC17610	9	Family	iPHoP
RGVC17616	4	Genus	iPHoP
RGVC17617	4	Genus	iPHoP
RGVC17625	2	Genus
RGVC17628	4	Family
RGVC17630	3	Family	iPHoP
RGVC17635	2	Genus	iPHoP
RGVC17637	2	Genus	iPHoP
RGVC17641	6	Family
RGVC17647	6	Class
RGVC17661	3	Class
RGVC17674	2	Domain
RGVC17678	10	Class
RGVC17688	8	Family
RGVC17691	3	Domain
RGVC17701	2	Genus
RGVC17703	3	Family
RGVC17708	3	Family	iPHoP
RGVC17722	2	Order
RGVC17727	3	Family
RGVC17728	3	Order
RGVC17731	3	Family	iPHoP
RGVC17734	3	Family
RGVC17737	3	Family
RGVC17752	2	Genus
RGVC17753	5	Family
RGVC17770	2	Genus
RGVC17804	2	Family
RGVC17806	2	Family
RGVC17807	3	Genus	iPHoP
RGVC17811	3	Genus	iPHoP
RGVC17846	2	Genus
RGVC17853	2	Genus
RGVC17855	2	Domain
RGVC17857	5	Family
RGVC17867	4	Genus
RGVC17870	2	Class
RGVC17871	2	Genus	iPHoP
RGVC17877	2	Family
RGVC17886	4	Family	iPHoP
RGVC17916	4	Genus	iPHoP
RGVC17929	2	Genus	iPHoP
RGVC17935	3	Family
RGVC17939	2	Genus
RGVC17946	3	Genus
RGVC17952	4	Domain
RGVC17965	7	Family
RGVC17967	2	Family
RGVC17986	2	Genus
RGVC18002	2	Order
RGVC18008	5	Class
RGVC18017	2	Genus
RGVC18020	4	Order
RGVC18024	2	Genus
RGVC18038	2	Family	iPHoP
RGVC18045	6	Genus	iPHoP
RGVC18060	6	Genus	iPHoP
RGVC18068	2	Genus
RGVC18069	9	Domain
RGVC18079	8	Family	iPHoP
RGVC18085	5	Family	iPHoP
RGVC18089	2	Genus
RGVC18092	5	Family	iPHoP
RGVC18097	3	Family	iPHoP
RGVC18101	2	Genus	iPHoP
RGVC18112	2	Order
RGVC18133	3	Order	iPHoP
RGVC18151	7	Family	iPHoP
RGVC18155	2	Genus
RGVC18158	4	Genus
RGVC18181	2	Genus	iPHoP
RGVC18194	2	Species
RGVC18195	4	Order
RGVC18198	4	Family
RGVC18206	6	Genus	iPHoP
RGVC18210	3	Family	iPHoP
RGVC18216	4	Genus	iPHoP
RGVC18230	2	Family
RGVC18246	4	Archaea/Bacteria
RGVC18247	2	Genus	iPHoP
RGVC18251	4	Order
RGVC18258	2	Family
RGVC18262	10	Family
RGVC18268	3	Family
RGVC18273	4	Family
RGVC18274	4	Order
RGVC18284	4	Family	iPHoP
RGVC18286	2	Genus
RGVC18301	2	Class
RGVC18307	2	Genus
RGVC18322	3	Genus	iPHoP
RGVC18334	4	Genus
RGVC18384	2	Genus	iPHoP
RGVC18397	2	Genus
RGVC18503	2	Order
RGVC18548	2	Family
RGVC18549	12	Family
RGVC18564	7	Archaea/Bacteria
RGVC18589	3	Family
RGVC18608	2	Genus
RGVC18623	3	Genus
RGVC18626	3	Genus
RGVC18629	2	Order
RGVC18632	2	Genus
RGVC18652	5	Genus
RGVC18815	2	Genus
RGVC18850	2	Species
RGVC18887	6	Class
RGVC18890	2	Family
RGVC18902	7	Family	iPHoP
RGVC18916	3	Family
RGVC18917	8	Genus	iPHoP
RGVC18938	2	Family
RGVC18943	3	Order
RGVC18973	2	Genus
RGVC18975	4	Family
RGVC18986	3	Family	iPHoP
RGVC19039	4	Species
RGVC19040	2	Genus
RGVC19050	2	Family
RGVC19070	6	Family
RGVC19072	2	Phylum
RGVC19084	2	Family
RGVC19122	2	Family
RGVC19136	3	Genus	iPHoP
RGVC19145	2	Class
RGVC19149	3	Family
RGVC19150	3	Class
RGVC19158	4	Genus
RGVC19173	2	Family
RGVC19184	2	Species
RGVC19195	5	Family
RGVC19204	2	Genus	iPHoP
RGVC19217	2	Family
RGVC19220	4	Species
RGVC19226	4	Genus	iPHoP
RGVC19240	4	Genus	iPHoP
RGVC19247	4	Genus
RGVC19250	6	Genus	iPHoP
RGVC19254	4	Genus	iPHoP
RGVC19255	2	Species
RGVC19256	3	Family	iPHoP
RGVC19257	11	Archaea/Bacteria
RGVC19263	3	Genus	iPHoP
RGVC19267	2	Genus	iPHoP
RGVC19270	4	Family
RGVC19272	2	Family
RGVC19278	3	Family	iPHoP
RGVC19281	4	Genus
RGVC19290	6	Order
RGVC19291	6	Family
RGVC19295	5	Archaea/Bacteria
RGVC19301	2	Species
RGVC19303	3	Genus
RGVC19310	8	Family
RGVC19336	5	Genus	iPHoP
RGVC19341	4	Genus	iPHoP
RGVC19342	7	Family	iPHoP
RGVC19347	4	Family
RGVC19363	2	Genus	iPHoP
RGVC19370	3	Genus
RGVC19377	2	Species
RGVC19387	2	Family	iPHoP
RGVC19390	6	Family
RGVC19403	2	Order
RGVC19408	6	Genus	iPHoP
RGVC19414	3	Genus	iPHoP
RGVC19418	2	Family
RGVC19442	2	Family	iPHoP
RGVC19443	4	Genus	iPHoP
RGVC19459	2	Family
RGVC19460	4	Family
RGVC19469	2	Genus	iPHoP
RGVC19475	7	Family
RGVC19477	2	Genus
RGVC19478	2	Family
RGVC19483	2	Order
RGVC19504	4	Family
RGVC19511	2	Family	iPHoP
RGVC19524	3	Genus	iPHoP
RGVC19545	3	Genus	iPHoP
RGVC19551	4	Genus
RGVC19558	3	Species	CrisprOpenDB
RGVC19563	2	Family
RGVC19568	11	Genus	iPHoP
RGVC19581	3	Family
RGVC19593	2	Order
RGVC19606	2	Genus	iPHoP
RGVC19607	2	Order
RGVC19609	5	Order
RGVC19616	2	Genus
RGVC19623	2	Family
RGVC19636	2	Genus	iPHoP
RGVC19644	2	Genus	iPHoP
RGVC19645	4	Order
RGVC19653	2	Order
RGVC19674	2	Family
RGVC19677	5	Domain
RGVC19695	3	Family
RGVC19697	4	Family
RGVC19707	2	Species
RGVC19710	5	Genus
RGVC19718	3	Family
RGVC19720	3	Order
RGVC19736	2	Genus
RGVC19737	2	Genus
RGVC19778	3	Order
RGVC19783	3	Genus	iPHoP
RGVC19793	2	Family
RGVC19810	2	Order
RGVC19842	4	Genus	iPHoP
RGVC19849	8	Family
RGVC19863	7	Family
RGVC19871	4	Order
RGVC19903	3	Genus
RGVC19906	2	Family
RGVC19917	2	Genus
RGVC19939	2	Genus	iPHoP
RGVC20016	2	Genus
RGVC20022	3	Genus
RGVC20049	2	Genus
RGVC20066	2	Genus
RGVC20078	2	Genus	iPHoP
RGVC20105	3	Genus	iPHoP
RGVC20176	3	Family
RGVC20183	5	Genus
RGVC20202	8	Genus
RGVC20205	3	Genus	iPHoP
RGVC20217	2	Order
RGVC20230	2	Species
RGVC20259	4	Genus	iPHoP
RGVC20261	4	Genus
RGVC20317	2	Genus	iPHoP
RGVC20318	2	Family
RGVC20336	3	Genus
RGVC20338	2	Family
RGVC20342	2	Genus	iPHoP
RGVC20343	3	Genus
RGVC20352	4	Genus	iPHoP
RGVC20361	5	Genus	iPHoP
RGVC20396	3	Genus
RGVC20400	2	Order
RGVC20402	2	Family
RGVC20404	2	Family	iPHoP
RGVC20405	3	Domain
RGVC20425	2	Species
RGVC20429	2	Genus
RGVC20446	4	Genus	iPHoP
RGVC20456	2	Genus
RGVC20465	6	Genus	iPHoP
RGVC20467	2	Genus
RGVC20481	2	Order
RGVC20482	3	Genus	iPHoP
RGVC20498	2	Family
RGVC20505	2	Genus	iPHoP
RGVC20511	3	Family
RGVC20519	4	Genus	iPHoP
RGVC20525	2	Genus
RGVC20585	2	Genus	iPHoP
RGVC20587	3	Family
RGVC20592	2	Domain
RGVC20598	2	Genus	iPHoP
RGVC20608	2	Family
RGVC20609	2	Genus	iPHoP
RGVC20624	2	Genus	iPHoP
RGVC20626	5	Genus	iPHoP
RGVC20660	7	Family	iPHoP
RGVC20664	3	Genus
RGVC20673	2	Genus
RGVC20695	3	Genus	iPHoP
RGVC20698	4	Genus
RGVC20699	9	Family
RGVC20710	2	Family
RGVC20716	2	Genus	iPHoP
RGVC20717	2	Species
RGVC20744	3	Species
RGVC20753	4	Genus	iPHoP
RGVC20756	4	Genus	CrisprOpenDB, iPHoP
RGVC20777	6	Domain
RGVC20791	2	Genus	CrisprOpenDB, iPHoP
RGVC20818	2	Genus	iPHoP
RGVC20835	8	Family	iPHoP
RGVC20848	2	Genus	iPHoP
RGVC20868	6	Family
RGVC20871	4	Genus	iPHoP
RGVC20875	2	Genus
RGVC20889	2	Genus
RGVC20950	5	Domain
RGVC20964	3	Class
RGVC20971	2	Family	iPHoP
RGVC20977	5	Order
RGVC20981	3	Genus
RGVC21040	2	Species
RGVC21053	3	Genus	iPHoP
RGVC21058	5	Family
RGVC21094	2	Genus	iPHoP
RGVC21099	2	Genus	iPHoP
RGVC21102	3	Family
RGVC21104	2	Genus	iPHoP
RGVC21106	2	Order
RGVC21110	3	Genus	iPHoP
RGVC21124	3	Genus
RGVC21132	2	Family
RGVC21150	2	Family	iPHoP
RGVC21155	5	Family	iPHoP
RGVC21174	9	Order
RGVC21185	3	Family
RGVC21246	2	Genus
RGVC21251	2	Family
RGVC21272	13	Genus	iPHoP
RGVC21275	2	Genus	iPHoP
RGVC21276	6	Family	iPHoP
RGVC21280	2	Genus	iPHoP
RGVC21282	5	Genus	iPHoP
RGVC21305	2	Genus	iPHoP
RGVC21330	2	Species	CrisprOpenDB
RGVC21354	2	Class
RGVC21381	2	Family
RGVC21390	2	Family
RGVC21393	2	Family
RGVC21397	4	Class
RGVC21410	2	Family
RGVC21413	3	Domain
RGVC21425	6	Family	iPHoP
RGVC21428	2	Family
RGVC21432	2	Domain
RGVC21438	3	Domain
RGVC21456	3	Genus
RGVC21463	3	Genus
RGVC21464	3	Genus
RGVC21468	2	Family
RGVC21496	9	Order
RGVC21511	2	Order
RGVC21514	8	Order
RGVC21532	2	Domain
RGVC21538	4	Family
RGVC21540	2	Class
RGVC21549	8	Family
RGVC21566	3	Genus	iPHoP
RGVC21569	5	Domain
RGVC21610	8	Genus	iPHoP
RGVC21622	5	Class	iPHoP
RGVC21636	4	Genus	iPHoP
RGVC21638	3	Family
RGVC21648	2	Genus
RGVC21652	4	Family
RGVC21681	2	Genus	iPHoP
RGVC21687	2	Family
RGVC21724	2	Order
RGVC21734	2	Genus	iPHoP
RGVC21740	2	Family
RGVC21755	4	Genus
RGVC21761	3	Family	iPHoP
RGVC21778	7	Family	iPHoP
RGVC21781	2	Order
RGVC21788	2	Domain
RGVC21789	10	Order
RGVC21793	4	Family
RGVC21818	3	Archaea/Bacteria
RGVC21855	3	Order
RGVC21869	2	Family
RGVC21870	2	Genus
RGVC21875	3	Family
RGVC21885	3	Family	iPHoP
RGVC21889	2	Family
RGVC21891	4	Order
RGVC21911	2	Domain
RGVC21917	2	Genus
RGVC21932	2	Domain
RGVC21936	4	Family
RGVC21950	3	Genus	iPHoP
RGVC21951	3	Family
RGVC21955	2	Order
RGVC21959	3	Archaea/Bacteria
RGVC21965	4	Genus	iPHoP
RGVC21975	5	Archaea/Bacteria
RGVC21976	7	Class
RGVC21980	2	Genus
RGVC21983	6	Genus	iPHoP
RGVC21985	14	Order
RGVC21987	2	Family
RGVC21990	4	Genus	iPHoP
RGVC22000	2	Genus	iPHoP
RGVC22010	3	Order
RGVC22018	3	Family
RGVC22048	3	Genus	iPHoP
RGVC22069	2	Family
RGVC22087	15	Order
RGVC22101	3	Family
RGVC22106	5	Family	iPHoP
RGVC22110	3	Family
RGVC22131	10	Order
RGVC22132	2	Genus
RGVC22161	2	Genus	iPHoP
RGVC22162	3	Family
RGVC22165	2	Genus	iPHoP
RGVC22166	5	Genus	iPHoP
RGVC22175	4	Genus	iPHoP
RGVC22181	2	Genus	iPHoP
RGVC22183	2	Genus	iPHoP
RGVC22209	2	Genus
RGVC22224	6	Genus	iPHoP
RGVC22272	3	Genus	iPHoP
RGVC22277	3	Genus	iPHoP
RGVC22364	9	Family	iPHoP
RGVC22372	2	Genus	iPHoP
RGVC22454	4	Genus	iPHoP
RGVC22513	4	Family
RGVC22529	4	Archaea/Bacteria
RGVC22542	4	Archaea/Bacteria
RGVC22563	2	Genus
RGVC22620	5	Order
RGVC22641	2	Genus	iPHoP
RGVC22645	2	Genus	iPHoP
RGVC22648	2	Genus
RGVC22654	2	Genus	iPHoP
RGVC22717	5	Genus
RGVC22723	2	Genus	iPHoP
RGVC22725	2	Genus
RGVC22745	2	Family
RGVC22751	2	Genus	iPHoP
RGVC22774	4	Genus
RGVC22781	2	Genus	iPHoP
RGVC22784	2	Genus	iPHoP
RGVC22785	2	Order
RGVC22787	5	Order
RGVC22790	3	Genus	iPHoP
RGVC22793	2	Species
RGVC22798	4	Family
RGVC22799	2	Genus
RGVC22812	4	Family
RGVC22816	4	Family
RGVC22824	2	Family
RGVC22833	3	Genus
RGVC22839	3	Genus
RGVC22861	2	Genus	iPHoP
RGVC22865	3	Family
RGVC22873	3	Species
RGVC22876	3	Family
RGVC22878	7	Class
RGVC22887	2	Genus
RGVC22891	2	Species
RGVC22913	2	Genus	iPHoP
RGVC22928	3	Family
RGVC22931	2	Family	iPHoP
RGVC22932	2	Genus
RGVC22956	2	Family
RGVC22974	3	Order
RGVC22987	3	Genus
RGVC23019	2	Family	iPHoP
RGVC23022	2	Genus	iPHoP
RGVC23049	3	Genus	iPHoP
RGVC23063	2	Family
RGVC23072	2	Family	iPHoP
RGVC23099	3	Class
RGVC23112	2	Family	iPHoP
RGVC23117	3	Order
RGVC23124	2	Genus
RGVC23133	2	Order
RGVC23140	2	Class
RGVC23142	3	Order	iPHoP
RGVC23169	3	Family
RGVC23174	2	Species
RGVC23230	2	Genus
RGVC23231	4	Family
RGVC23264	5	Genus	iPHoP
RGVC23268	9	Class
RGVC23271	2	Order
RGVC23285	3	Genus
RGVC23288	2	Archaea/Bacteria
RGVC23290	2	Family	iPHoP
RGVC23295	6	Family	iPHoP
RGVC23323	2	Order
RGVC23328	5	Class
RGVC23346	2	Genus	iPHoP
RGVC23355	3	Family
RGVC23362	3	Archaea/Bacteria
RGVC23386	2	Order
RGVC23393	2	Species	CrisprOpenDB
RGVC23408	3	Family
RGVC23410	2	Class
RGVC23418	3	Genus	iPHoP
RGVC23424	4	Genus	iPHoP
RGVC23432	2	Order
RGVC23455	2	Family
RGVC23479	3	Order
RGVC23505	2	Genus
RGVC23517	2	Genus	iPHoP
RGVC23530	6	Family
RGVC23541	6	Class
RGVC23553	2	Family
RGVC23578	2	Family	iPHoP
RGVC23585	2	Family
RGVC23593	6	Genus	iPHoP
RGVC23597	6	Genus
RGVC23602	2	Genus	iPHoP
RGVC23609	4	Family
RGVC23623	2	Genus	iPHoP
RGVC23674	3	Family
RGVC23675	2	Family
RGVC23711	2	Family
RGVC23725	3	Genus	iPHoP
RGVC23737	4	Family
RGVC23743	2	Genus	iPHoP
RGVC23750	2	Species
RGVC23783	2	Genus	iPHoP
RGVC23830	2	Genus
RGVC23840	6	Genus	iPHoP
[truncated: 726 more rows]
