# Supplementary material for: Spatial heterogeneity of viral communities across the gastrointestinal tracts of ruminants
Source: Research Square preprint supplement (doi:10.21203/rs.3.rs-4244627/v1), 2024-04-10
Supplement: Supplementary file 9 [file 5542e3f849a824e27796ed20.xlsx]

## Sheet: Table S9
Table S9. Alpha diversities of 370 GIT samples
Sample	Shannon	Simpson	Richness	Chao1	Ace	Obs	Pielou	Goods_coverage	Region	Species
Dairy_cattle_Abomasum.1_RPKM	8.3742	0.999353	22400	236527	249512	22400	0.579481	1	Abomasum	Dairy
Dairy_cattle_Abomasum.2_RPKM	8.28754	0.999248	24304	296709	300600	24304	0.568851	1	Abomasum	Dairy
Dairy_cattle_Abomasum.3_RPKM	8.39079	0.999383	25369	285863	298349	25369	0.573502	1	Abomasum	Dairy
Dairy_cattle_Abomasum.4_RPKM	8.18361	0.999237	20031	238579	256875	20031	0.572683	1	Abomasum	Dairy
Dairy_cattle_Abomasum.5_RPKM	8.38341	0.999346	24416	312897	311319	24416	0.57517	1	Abomasum	Dairy
Dairy_cattle_Abomasum.6_RPKM	8.34913	0.999396	23166	240176	253117	23166	0.575813	1	Abomasum	Dairy
Dairy_cattle_Cecum.1_RPKM	8.35937	0.99932	25283	214198	235302	25283	0.571547	1	Cecum	Dairy
Dairy_cattle_Cecum.2_RPKM	8.23643	0.999077	25441	305904	354127	25441	0.562795	1	Cecum	Dairy
Dairy_cattle_Cecum.3_RPKM	8.26846	0.999154	26350	253210	284516	26350	0.563035	1	Cecum	Dairy
Dairy_cattle_Cecum.4_RPKM	8.23369	0.999225	27419	330722	353179	27419	0.558485	1	Cecum	Dairy
Dairy_cattle_Cecum.5_RPKM	8.18041	0.99837	26608	312338	340284	26608	0.556506	1	Cecum	Dairy
Dairy_cattle_Cecum.6_RPKM	8.19276	0.999157	26333	335878	345858	26333	0.557916	1	Cecum	Dairy
Dairy_cattle_Colon.1_RPKM	8.33578	0.999293	27848	255773	277608	27848	0.564553	1	Colon	Dairy
Dairy_cattle_Colon.2_RPKM	8.25788	0.99908	26348	305557	354262	26348	0.562319	1	Colon	Dairy
Dairy_cattle_Colon.3_RPKM	8.18477	0.999062	26991	244172	269927	26991	0.556023	1	Colon	Dairy
Dairy_cattle_Colon.4_RPKM	8.09771	0.999008	27666	384011	417925	27666	0.548781	1	Colon	Dairy
Dairy_cattle_Colon.5_RPKM	7.7898	0.991837	27695	348396	396925	27695	0.527859	1	Colon	Dairy
Dairy_cattle_Colon.6_RPKM	8.14247	0.999105	23696	274094	286029	23696	0.560299	1	Colon	Dairy
Dairy_cattle_Duodenum.1_RPKM	7.90089	0.998135	27676	246020	212167	27676	0.535423	1	Duodenum	Dairy
Dairy_cattle_Duodenum.2_RPKM	8.42506	0.999029	26869	190239	193176	26869	0.572601	1	Duodenum	Dairy
Dairy_cattle_Duodenum.3_RPKM	7.87752	0.99853	29151	304437	222045	29151	0.531143	1	Duodenum	Dairy
Dairy_cattle_Duodenum.4_RPKM	8.07448	0.998879	23447	242326	245170	23447	0.556204	1	Duodenum	Dairy
Dairy_cattle_Duodenum.5_RPKM	8.34423	0.999175	24498	184054	190931	24498	0.572292	1	Duodenum	Dairy
Dairy_cattle_Duodenum.6_RPKM	7.94247	0.998756	25331	202143	198013	25331	0.542941	1	Duodenum	Dairy
Dairy_cattle_Ileum.1_RPKM	7.94414	0.99872	10436	27315.2	29704.4	10436	0.595099	1	Ileum	Dairy
Dairy_cattle_Ileum.2_RPKM	7.62269	0.998867	7001	14914	13674.9	7001	0.596766	1	Ileum	Dairy
Dairy_cattle_Ileum.3_RPKM	7.96384	0.998827	16232	72897.6	64734.1	16232	0.569393	1	Ileum	Dairy
Dairy_cattle_Ileum.4_RPKM	7.68487	0.998168	12513	44172	44406.1	12513	0.564602	1	Ileum	Dairy
Dairy_cattle_Ileum.5_RPKM	7.83157	0.998947	8671	19874.2	20049.7	8671	0.598653	1	Ileum	Dairy
Dairy_cattle_Ileum.6_RPKM	7.95735	0.998801	10749	29782.9	30061.8	10749	0.594191	1	Ileum	Dairy
Dairy_cattle_Jejunum.1_RPKM	8.00345	0.998891	28537	250961	213875	28537	0.540753	1	Jejunum	Dairy
Dairy_cattle_Jejunum.2_RPKM	8.38878	0.999314	32281	291219	264317	32281	0.560059	1	Jejunum	Dairy
Dairy_cattle_Jejunum.3_RPKM	7.93536	0.998683	13802	48534.5	45378.5	13802	0.577009	1	Jejunum	Dairy
Dairy_cattle_Jejunum.4_RPKM	7.76748	0.998037	15890	70012.1	72232.9	15890	0.556576	1	Jejunum	Dairy
Dairy_cattle_Jejunum.5_RPKM	7.90314	0.998637	13202	46023.8	47105.5	13202	0.577357	1	Jejunum	Dairy
Dairy_cattle_Jejunum.6_RPKM	7.76161	0.998106	23945	182042	178104	23945	0.533538	1	Jejunum	Dairy
Dairy_cattle_Omasum.1_RPKM	8.04601	0.998938	23237	319233	330780	23237	0.554739	1	Omasum	Dairy
Dairy_cattle_Omasum.2_RPKM	8.12537	0.998996	23682	321488	328322	23682	0.559156	1	Omasum	Dairy
Dairy_cattle_Omasum.3_RPKM	8.21848	0.999161	24286	281260	295866	24286	0.564152	1	Omasum	Dairy
Dairy_cattle_Omasum.4_RPKM	8.1071	0.999083	22629	301132	306823	22629	0.560429	1	Omasum	Dairy
Dairy_cattle_Omasum.5_RPKM	8.24394	0.999219	24386	318541	332904	24386	0.56567	1	Omasum	Dairy
Dairy_cattle_Omasum.6_RPKM	8.22081	0.99921	23900	325592	315408	23900	0.565209	1	Omasum	Dairy
Dairy_cattle_Rectum.1_RPKM	8.21162	0.998975	26016	296362	332193	26016	0.559867	1	Rectum	Dairy
Dairy_cattle_Rectum.2_RPKM	8.26494	0.999002	22531	212203	245233	22531	0.571587	1	Rectum	Dairy
Dairy_cattle_Rectum.3_RPKM	8.21015	0.999043	29051	283617	309424	29051	0.553756	1	Rectum	Dairy
Dairy_cattle_Rectum.4_RPKM	8.02769	0.998894	24886	305303	347241	24886	0.549727	1	Rectum	Dairy
Dairy_cattle_Rectum.5_RPKM	7.07129	0.965175	25107	333801	397978	25107	0.483811	1	Rectum	Dairy
Dairy_cattle_Rectum.6_RPKM	8.01544	0.99887	24406	314576	333404	24406	0.549947	1	Rectum	Dairy
Dairy_cattle_Reticulum.1_RPKM	8.51217	0.999465	24954	255926	281947	24954	0.582747	1	Reticulum	Dairy
Dairy_cattle_Reticulum.2_RPKM	8.43595	0.999293	24938	274212	301156	24938	0.577565	1	Reticulum	Dairy
Dairy_cattle_Reticulum.3_RPKM	8.41473	0.999401	25095	266389	283829	25095	0.575755	1	Reticulum	Dairy
Dairy_cattle_Reticulum.4_RPKM	8.50431	0.999453	26630	317234	353727	26630	0.578494	1	Reticulum	Dairy
Dairy_cattle_Reticulum.5_RPKM	8.55446	0.999479	25766	269727	297529	25766	0.583795	1	Reticulum	Dairy
Dairy_cattle_Reticulum.6_RPKM	8.46423	0.99948	25627	267248	283009	25627	0.577945	1	Reticulum	Dairy
Dairy_cattle_Rumen.1_RPKM	8.36063	0.999317	27136	360523	391019	27136	0.567672	1	Rumen	Dairy
Dairy_cattle_Rumen.2_RPKM	8.33762	0.99928	26892	383576	426025	26892	0.566611	1	Rumen	Dairy
Dairy_cattle_Rumen.3_RPKM	8.36217	0.999367	26758	328984	348315	26758	0.568558	1	Rumen	Dairy
Dairy_cattle_Rumen.4_RPKM	8.27446	0.999266	26778	411476	448733	26778	0.562553	1	Rumen	Dairy
Dairy_cattle_Rumen.5_RPKM	8.41903	0.999355	27463	357682	388566	27463	0.570968	1	Rumen	Dairy
Dairy_cattle_Rumen.6_RPKM	8.25965	0.999287	26396	381705	379846	26396	0.562339	1	Rumen	Dairy
Goat_Abomasum.1_RPKM	7.35202	0.998252	12879	148810	147078	12879	0.538502	1	Abomasum	Goat
Goat_Abomasum.2_RPKM	6.23043	0.979473	12067	155173	160334	12067	0.459513	1	Abomasum	Goat
Goat_Abomasum.3_RPKM	7.1984	0.997349	12389	126391	127832	12389	0.52942	1	Abomasum	Goat
Goat_Abomasum.4_RPKM	7.39735	0.998528	11340	111487	109530	11340	0.549208	1	Abomasum	Goat
Goat_Abomasum.5_RPKM	7.3555	0.998488	12238	111390	101831	12238	0.541678	1	Abomasum	Goat
Goat_Abomasum.6_RPKM	7.19547	0.998064	13066	170651	177632	13066	0.526233	1	Abomasum	Goat
Goat_Cecum.1_RPKM	7.38399	0.99836	12067	130173	132417	12067	0.544591	1	Cecum	Goat
Goat_Cecum.2_RPKM	7.38677	0.998553	11753	115285	119312	11753	0.546329	1	Cecum	Goat
Goat_Cecum.3_RPKM	7.39124	0.998263	12796	128387	131002	12796	0.541745	1	Cecum	Goat
Goat_Cecum.4_RPKM	7.03594	0.995872	12326	141185	149300	12326	0.517751	1	Cecum	Goat
Goat_Cecum.5_RPKM	7.28639	0.997999	13486	151864	159960	13486	0.53111	1	Cecum	Goat
Goat_Cecum.6_RPKM	7.39637	0.998381	12321	121055	124190	12321	0.544298	1	Cecum	Goat
Goat_Colon.1_RPKM	7.37328	0.998168	12701	141338	144254	12701	0.540854	1	Colon	Goat
Goat_Colon.2_RPKM	7.3403	0.998473	11357	109593	115730	11357	0.544884	1	Colon	Goat
Goat_Colon.3_RPKM	7.41759	0.998358	12491	125910	129570	12491	0.545067	1	Colon	Goat
Goat_Colon.4_RPKM	7.33555	0.998067	11353	106374	109189	11353	0.544552	1	Colon	Goat
Goat_Colon.5_RPKM	7.29399	0.998089	11568	108975	114402	11568	0.540382	1	Colon	Goat
Goat_Colon.6_RPKM	7.30669	0.998148	12632	143917	144494	12632	0.536279	1	Colon	Goat
Goat_Duodenum.1_RPKM	6.32664	0.993438	12067	181046	175782	12067	0.466608	1	Duodenum	Goat
Goat_Duodenum.2_RPKM	5.87964	0.985021	8999	115834	102133	8999	0.447613	1	Duodenum	Goat
Goat_Duodenum.3_RPKM	5.93675	0.990044	13386	238109	223398	13386	0.433073	1	Duodenum	Goat
Goat_Duodenum.4_RPKM	5.96505	0.97903	6729	32607.4	34931.9	6729	0.469091	1	Duodenum	Goat
Goat_Duodenum.5_RPKM	7.38334	0.998514	11440	94042.8	89876.9	11440	0.547652	1	Duodenum	Goat
Goat_Duodenum.6_RPKM	7.17876	0.997288	10597	92303.4	102578	10597	0.536875	1	Duodenum	Goat
Goat_Ileum.1_RPKM	6.12576	0.992678	9336	141629	120323	9336	0.464474	1	Ileum	Goat
Goat_Ileum.2_RPKM	5.86548	0.989187	8555	115783	107166	8555	0.44903	1	Ileum	Goat
Goat_Ileum.3_RPKM	6.44041	0.995483	9490	109065	95799.4	9490	0.48746	1	Ileum	Goat
Goat_Ileum.4_RPKM	6.13033	0.992885	11076	195957	173624	11076	0.45629	1	Ileum	Goat
Goat_Ileum.5_RPKM	6.15191	0.993768	8839	114729	108286	8839	0.469265	1	Ileum	Goat
Goat_Ileum.6_RPKM	5.54257	0.969715	8154	101195	88461.4	8154	0.426572	1	Ileum	Goat
Goat_Jejunum.1_RPKM	6.45778	0.994682	11212	165482	141005	11212	0.480034	1	Jejunum	Goat
Goat_Jejunum.2_RPKM	5.135	0.945798	11662	211132	202113	11662	0.380102	1	Jejunum	Goat
Goat_Jejunum.3_RPKM	6.10382	0.991135	11250	180623	151391	11250	0.453558	1	Jejunum	Goat
Goat_Jejunum.4_RPKM	5.74021	0.988806	8818	116800	102789	8818	0.437976	1	Jejunum	Goat
Goat_Jejunum.5_RPKM	5.53477	0.987672	9345	159506	137674	9345	0.419619	1	Jejunum	Goat
Goat_Jejunum.6_RPKM	5.96692	0.992586	8430	116221	105164	8430	0.45754	1	Jejunum	Goat
Goat_Omasum.1_RPKM	7.36756	0.998275	12750	151723	150325	12750	0.540215	1	Omasum	Goat
Goat_Omasum.2_RPKM	6.96326	0.997113	12263	150845	161924	12263	0.512682	1	Omasum	Goat
Goat_Omasum.3_RPKM	7.14549	0.997208	12396	145677	151227	12396	0.525497	1	Omasum	Goat
Goat_Omasum.4_RPKM	7.16719	0.997215	12150	136212	148600	12150	0.528216	1	Omasum	Goat
Goat_Omasum.5_RPKM	7.34706	0.998215	12330	110810	107150	12330	0.540627	1	Omasum	Goat
Goat_Omasum.6_RPKM	7.17306	0.997833	12423	152353	163598	12423	0.527402	1	Omasum	Goat
Goat_Rectum.1_RPKM	7.32616	0.997824	13000	133299	142279	13000	0.536078	1	Rectum	Goat
Goat_Rectum.2_RPKM	7.23556	0.997989	10179	91695.1	93886.9	10179	0.543483	1	Rectum	Goat
Goat_Rectum.3_RPKM	7.44483	0.998391	13138	140579	139156	13138	0.544155	1	Rectum	Goat
Goat_Rectum.4_RPKM	7.22305	0.99757	11749	116800	118948	11749	0.534239	1	Rectum	Goat
Goat_Rectum.5_RPKM	7.17432	0.997686	12627	137731	145047	12627	0.526586	1	Rectum	Goat
Goat_Rectum.6_RPKM	7.26661	0.997822	12200	127543	132602	12200	0.535309	1	Rectum	Goat
Goat_Reticulum.1_RPKM	7.30029	0.99831	12682	134165	140195	12682	0.535585	1	Reticulum	Goat
Goat_Reticulum.2_RPKM	6.57535	0.989489	12114	131241	147335	12114	0.484751	1	Reticulum	Goat
Goat_Reticulum.3_RPKM	6.9226	0.995139	12490	134934	140357	12490	0.508697	1	Reticulum	Goat
Goat_Reticulum.4_RPKM	7.25408	0.998221	12206	134828	141046	12206	0.534358	1	Reticulum	Goat
Goat_Reticulum.5_RPKM	7.17782	0.997781	12486	145419	127260	12486	0.52747	1	Reticulum	Goat
Goat_Reticulum.6_RPKM	6.74322	0.995728	12025	149350	149188	12025	0.497517	1	Reticulum	Goat
Goat_Rumen.1_RPKM	7.16257	0.998006	14015	187560	190395	14015	0.519981	1	Rumen	Goat
Goat_Rumen.2_RPKM	6.58495	0.984095	14350	191195	192422	14350	0.476868	1	Rumen	Goat
Goat_Rumen.3_RPKM	6.74175	0.994194	13465	180112	177347	13465	0.491491	1	Rumen	Goat
Goat_Rumen.4_RPKM	7.1879	0.998165	13222	183280	180734	13222	0.525023	1	Rumen	Goat
Goat_Rumen.5_RPKM	7.19654	0.997599	13822	173897	148863	13822	0.523207	1	Rumen	Goat
Goat_Rumen.6_RPKM	6.22015	0.991351	12885	203081	186674	12885	0.455575	1	Rumen	Goat
Roe_deer_Abomasum.1_RPKM	6.19831	0.994752	9812	156780	132570	9812	0.467432	1	Abomasum	Roe
Roe_deer_Abomasum.2_RPKM	6.25293	0.994523	7835	82146.9	69601.5	7835	0.483385	1	Abomasum	Roe
Roe_deer_Abomasum.3_RPKM	5.47834	0.973151	7403	92548.6	79150.7	7403	0.426201	1	Abomasum	Roe
Roe_deer_Abomasum.4_RPKM	4.98358	0.952887	7845	147119	131244	7845	0.385203	1	Abomasum	Roe
Roe_deer_Abomasum.5_RPKM	6.02082	0.991972	7892	74622.2	70879.9	7892	0.465066	1	Abomasum	Roe
Roe_deer_Cecum.1_RPKM	6.5968	0.987904	13122	200386	164200	13122	0.482233	1	Cecum	Roe
Roe_deer_Cecum.2_RPKM	6.88457	0.997037	12145	175440	155346	12145	0.507409	1	Cecum	Roe
Roe_deer_Cecum.3_RPKM	6.94018	0.997111	11125	127268	124837	11125	0.516324	1	Cecum	Roe
Roe_deer_Cecum.4_RPKM	6.66348	0.994836	10119	132699	117740	10119	0.500834	1	Cecum	Roe
Roe_deer_Cecum.5_RPKM	4.31557	0.798517	11997	212733	176815	11997	0.318483	1	Cecum	Roe
Roe_deer_Colon.1_RPKM	7.17799	0.997026	12454	135093	134989	12454	0.527625	1	Colon	Roe
Roe_deer_Colon.2_RPKM	7.00056	0.997484	11966	156399	141063	11966	0.516774	1	Colon	Roe
Roe_deer_Colon.3_RPKM	7.01942	0.996824	10757	115367	107610	10757	0.524112	1	Colon	Roe
Roe_deer_Colon.4_RPKM	6.80445	0.996896	10058	123734	108750	10058	0.511764	1	Colon	Roe
Roe_deer_Colon.5_RPKM	4.57309	0.821369	11181	178157	148916	11181	0.340038	1	Colon	Roe
Roe_deer_Duodenum.1_RPKM	6.17553	0.994371	8213	100862	91068.7	8213	0.474906	1	Duodenum	Roe
Roe_deer_Duodenum.2_RPKM	6.54844	0.996261	8976	93379.6	89281.9	8976	0.498668	1	Duodenum	Roe
Roe_deer_Duodenum.3_RPKM	6.17254	0.991754	2077	3605.56	3625.97	2077	0.560107	1	Duodenum	Roe
Roe_deer_Duodenum.4_RPKM	3.66553	0.858186	788	1059.08	1026.08	788	0.380951	1	Duodenum	Roe
Roe_deer_Duodenum.5_RPKM	4.75042	0.957632	1169	1660.06	1779.75	1169	0.466136	1	Duodenum	Roe
Roe_deer_Ileum.1_RPKM	3.82998	0.845643	1892	3415.49	3909.59	1892	0.351836	1	Ileum	Roe
Roe_deer_Ileum.2_RPKM	7.09826	0.997699	5415	19035	21126.4	5415	0.572313	1	Ileum	Roe
Roe_deer_Ileum.3_RPKM	5.42645	0.978955	900	958.217	946.144	900	0.552942	1	Ileum	Roe
Roe_deer_Ileum.4_RPKM	2.56399	0.706812	3752	59604.9	55754.8	3752	0.215943	1	Ileum	Roe
Roe_deer_Ileum.5_RPKM	1.07966	0.29794	4890	98619.2	76503.1	4890	0.0880951	1	Ileum	Roe
Roe_deer_Jejunum.1_RPKM	4.15572	0.900758	10057	246282	226626	10057	0.312556	1	Jejunum	Roe
Roe_deer_Jejunum.2_RPKM	4.51601	0.955594	9583	220120	192707	9583	0.341443	1	Jejunum	Roe
Roe_deer_Jejunum.3_RPKM	4.75441	0.971005	7066	189199	164178	7066	0.371825	1	Jejunum	Roe
Roe_deer_Jejunum.4_RPKM	2.06847	0.588364	2713	42963.4	39768.1	2713	0.181355	1	Jejunum	Roe
Roe_deer_Jejunum.5_RPKM	1.19631	0.324526	3032	35770.1	32807.1	3032	0.103433	1	Jejunum	Roe
Roe_deer_Omasum.1_RPKM	6.00423	0.993072	9203	139434	127930	9203	0.455975	1	Omasum	Roe
Roe_deer_Omasum.2_RPKM	6.33251	0.994845	9403	131416	103584	9403	0.479776	1	Omasum	Roe
Roe_deer_Omasum.3_RPKM	5.77988	0.987192	8073	111350	98630.6	8073	0.445329	1	Omasum	Roe
Roe_deer_Omasum.4_RPKM	5.74814	0.991935	6985	100214	87037.2	6985	0.450127	1	Omasum	Roe
Roe_deer_Omasum.5_RPKM	5.71453	0.985629	9077	112028	100644	9077	0.434631	1	Omasum	Roe
Roe_deer_Rectum.1_RPKM	7.23054	0.997507	12920	139092	138532	12920	0.529426	1	Rectum	Roe
Roe_deer_Rectum.2_RPKM	6.97196	0.997295	12168	158271	144230	12168	0.513747	1	Rectum	Roe
Roe_deer_Rectum.3_RPKM	7.15274	0.997254	11341	116051	112862	11341	0.531042	1	Rectum	Roe
Roe_deer_Rectum.4_RPKM	6.84102	0.996489	10373	131810	112903	10373	0.512799	1	Rectum	Roe
Roe_deer_Rectum.5_RPKM	5.88032	0.952526	11331	143057	142133	11331	0.436615	1	Rectum	Roe
Roe_deer_Reticulum.1_RPKM	6.12066	0.99432	8793	134164	113577	8793	0.46715	1	Reticulum	Roe
Roe_deer_Reticulum.2_RPKM	6.2133	0.994036	9138	136660	98096.3	9138	0.472219	1	Reticulum	Roe
Roe_deer_Reticulum.3_RPKM	5.85366	0.990215	7935	126210	92936.5	7935	0.45188	1	Reticulum	Roe
Roe_deer_Reticulum.4_RPKM	5.25606	0.98516	7180	120720	107814	7180	0.410317	1	Reticulum	Roe
Roe_deer_Reticulum.5_RPKM	5.49615	0.97447	9076	120439	96801.9	9076	0.418027	1	Reticulum	Roe
Roe_deer_Rumen.1_RPKM	6.17238	0.994566	10230	177142	149436	10230	0.463374	1	Rumen	Roe
Roe_deer_Rumen.2_RPKM	6.19254	0.993766	10605	186135	131659	10605	0.463082	1	Rumen	Roe
Roe_deer_Rumen.3_RPKM	5.8619	0.989913	8665	146128	105932	8665	0.448124	1	Rumen	Roe
Roe_deer_Rumen.4_RPKM	5.26997	0.986008	7461	147785	120362	7461	0.409631	1	Rumen	Roe
Roe_deer_Rumen.5_RPKM	5.47546	0.970861	10699	187279	139983	10699	0.409069	1	Rumen	Roe
Sheep_Abomasum.1_RPKM	5.83607	0.975322	19507	351086	349206	19507	0.4095	1	Abomasum	Sheep
Sheep_Abomasum.2_RPKM	6.13597	0.988301	17787	299837	298862	17787	0.434604	1	Abomasum	Sheep
Sheep_Abomasum.3_RPKM	4.1047	0.939879	13816	254759	310781	13816	0.298436	1	Abomasum	Sheep
Sheep_Abomasum.4_RPKM	7.05061	0.996301	18489	252855	242173	18489	0.497419	1	Abomasum	Sheep
Sheep_Abomasum.5_RPKM	6.88688	0.99458	18761	248247	239632	18761	0.485147	1	Abomasum	Sheep
Sheep_Cecum.1_RPKM	7.38269	0.99757	15039	161573	167079	15039	0.532031	1	Cecum	Sheep
Sheep_Cecum.2_RPKM	7.74194	0.998799	13960	120485	126211	13960	0.562273	1	Cecum	Sheep
Sheep_Cecum.3_RPKM	7.49747	0.998214	13690	136780	143387	13690	0.545634	1	Cecum	Sheep
Sheep_Cecum.4_RPKM	7.55533	0.997603	14941	131373	148559	14941	0.544843	1	Cecum	Sheep
Sheep_Cecum.5_RPKM	7.6413	0.998567	14133	128868	139678	14133	0.554248	1	Cecum	Sheep
Sheep_Colon.1_RPKM	7.33413	0.997874	17930	282754	274922	17930	0.519043	1	Colon	Sheep
Sheep_Colon.2_RPKM	7.58888	0.998382	18224	246119	258593	18224	0.536182	1	Colon	Sheep
Sheep_Colon.3_RPKM	7.50596	0.998189	17121	227340	229418	17121	0.53372	1	Colon	Sheep
Sheep_Colon.4_RPKM	7.42384	0.996752	18168	222351	239275	18168	0.524686	1	Colon	Sheep
Sheep_Colon.5_RPKM	7.64205	0.998594	17877	219868	232985	17877	0.540999	1	Colon	Sheep
Sheep_Duodenum.1_RPKM	5.76912	0.988902	14269	354029	259139	14269	0.418034	1	Duodenum	Sheep
Sheep_Duodenum.2_RPKM	5.84917	0.988955	17220	403886	359755	17220	0.415666	1	Duodenum	Sheep
Sheep_Duodenum.3_RPKM	6.5781	0.993691	18626	309105	272231	18626	0.463735	1	Duodenum	Sheep
Sheep_Duodenum.4_RPKM	6.11154	0.99161	18017	354411	339901	18017	0.432306	1	Duodenum	Sheep
Sheep_Duodenum.5_RPKM	6.03948	0.992973	15742	426139	325104	15742	0.433175	1	Duodenum	Sheep
Sheep_Ileum.1_RPKM	5.91653	0.991061	15788	448409	314835	15788	0.424229	1	Ileum	Sheep
Sheep_Ileum.2_RPKM	5.86221	0.990136	12302	201327	182878	12302	0.43147	1	Ileum	Sheep
Sheep_Ileum.3_RPKM	5.62625	0.981243	13490	200015	212260	13490	0.410089	1	Ileum	Sheep
Sheep_Ileum.4_RPKM	5.95601	0.989534	14630	316336	244862	14630	0.430452	1	Ileum	Sheep
Sheep_Ileum.5_RPKM	6.16534	0.994239	13563	297599	239460	13563	0.449127	1	Ileum	Sheep
Sheep_Jejunum.1_RPKM	5.88304	0.991574	12347	274002	189923	12347	0.432835	1	Jejunum	Sheep
Sheep_Jejunum.2_RPKM	6.16969	0.993204	17413	334647	304011	17413	0.437943	1	Jejunum	Sheep
Sheep_Jejunum.3_RPKM	5.82134	0.982511	14420	210485	216347	14420	0.421355	1	Jejunum	Sheep
Sheep_Jejunum.4_RPKM	5.92207	0.989621	15437	357846	293118	15437	0.425616	1	Jejunum	Sheep
Sheep_Jejunum.5_RPKM	6.10202	0.993501	13828	339136	270809	13828	0.443612	1	Jejunum	Sheep
Sheep_Omasum.1_RPKM	7.14854	0.997075	18360	260859	256519	18360	0.504688	1	Omasum	Sheep
Sheep_Omasum.2_RPKM	7.25878	0.99786	19087	262250	265405	19087	0.510452	1	Omasum	Sheep
Sheep_Omasum.3_RPKM	6.93157	0.994815	16911	217644	209744	16911	0.493502	1	Omasum	Sheep
Sheep_Omasum.4_RPKM	7.32813	0.997953	19015	259762	253521	19015	0.515526	1	Omasum	Sheep
Sheep_Omasum.5_RPKM	7.17858	0.99657	17728	231565	224901	17728	0.508623	1	Omasum	Sheep
Sheep_Rectum.1_RPKM	7.42589	0.998145	17107	229557	228749	17107	0.528071	1	Rectum	Sheep
Sheep_Rectum.2_RPKM	7.70903	0.998791	17753	211502	221492	17753	0.546128	1	Rectum	Sheep
Sheep_Rectum.3_RPKM	7.62891	0.998568	18032	236480	240980	18032	0.539593	1	Rectum	Sheep
Sheep_Rectum.4_RPKM	7.5594	0.997975	18595	226901	245980	18595	0.533004	1	Rectum	Sheep
Sheep_Rectum.5_RPKM	7.62587	0.998508	17594	210376	227375	17594	0.540735	1	Rectum	Sheep
Sheep_Reticulum.1_RPKM	6.93109	0.995191	17337	236749	235429	17337	0.49221	1	Reticulum	Sheep
Sheep_Reticulum.2_RPKM	7.19254	0.997364	18956	282827	267435	18956	0.506147	1	Reticulum	Sheep
Sheep_Reticulum.3_RPKM	6.16901	0.982995	18781	297935	283616	18781	0.434529	1	Reticulum	Sheep
Sheep_Reticulum.4_RPKM	7.39268	0.998025	18866	261472	250814	18866	0.520483	1	Reticulum	Sheep
Sheep_Reticulum.5_RPKM	6.6224	0.988018	18928	266580	257659	18928	0.466096	1	Reticulum	Sheep
Sheep_Rumen.1_RPKM	7.06126	0.99608	20266	326641	304897	20266	0.493561	1	Rumen	Sheep
Sheep_Rumen.2_RPKM	7.3168	0.99785	20034	283032	273404	20034	0.512016	1	Rumen	Sheep
Sheep_Rumen.3_RPKM	7.28128	0.996973	19707	299203	249585	19707	0.510379	1	Rumen	Sheep
Sheep_Rumen.4_RPKM	7.47151	0.998372	19830	278382	258675	19830	0.523384	1	Rumen	Sheep
Sheep_Rumen.5_RPKM	7.14892	0.996609	19665	288709	262690	19665	0.501209	1	Rumen	Sheep
Water_buffalos_Abomasum.1_RPKM	6.48334	0.994078	11670	190210	170360	11670	0.479873	1	Abomasum	Buffalos
Water_buffalos_Abomasum.2_RPKM	7.78935	0.998733	19014	266343	260049	19014	0.547975	1	Abomasum	Buffalos
Water_buffalos_Abomasum.3_RPKM	6.67817	0.985584	8273	54124.2	52639.5	8273	0.513145	1	Abomasum	Buffalos
Water_buffalos_Abomasum.4_RPKM	6.68155	0.994975	11833	137394	144952	11833	0.493813	1	Abomasum	Buffalos
Water_buffalos_Abomasum.5_RPKM	7.16201	0.996962	12368	110082	113007	12368	0.526838	1	Abomasum	Buffalos
Water_buffalos_Cecum.1_RPKM	6.95079	0.996719	13698	176656	189451	13698	0.505818	1	Cecum	Buffalos
Water_buffalos_Cecum.2_RPKM	7.33046	0.997903	17952	236474	260712	17952	0.518719	1	Cecum	Buffalos
Water_buffalos_Cecum.3_RPKM	7.2948	0.995424	15742	198918	197958	15742	0.523212	1	Cecum	Buffalos
Water_buffalos_Cecum.4_RPKM	6.52921	0.995468	13374	240788	247569	13374	0.476336	1	Cecum	Buffalos
Water_buffalos_Cecum.5_RPKM	6.60018	0.994178	15008	277928	275182	15008	0.475742	1	Cecum	Buffalos
Water_buffalos_Colon.1_RPKM	6.93366	0.997114	12510	145332	164246	12510	0.509424	1	Colon	Buffalos
Water_buffalos_Colon.2_RPKM	7.07536	0.997808	17314	228394	256631	17314	0.502524	1	Colon	Buffalos
Water_buffalos_Colon.3_RPKM	5.63227	0.961754	10519	130786	129627	10519	0.421555	1	Colon	Buffalos
Water_buffalos_Colon.4_RPKM	5.69018	0.987569	7430	125923	120866	7430	0.442501	1	Colon	Buffalos
Water_buffalos_Colon.5_RPKM	6.36707	0.993395	12062	192795	215998	12062	0.469611	1	Colon	Buffalos
Water_buffalos_Duodenum.1_RPKM	6.65045	0.995112	3219	5950.91	5874.72	3219	0.570737	1	Duodenum	Buffalos
Water_buffalos_Duodenum.2_RPKM	6.34933	0.990892	7648	24100.3	27407.2	7648	0.492163	1	Duodenum	Buffalos
Water_buffalos_Duodenum.3_RPKM	4.96474	0.948866	870	1049.06	997.769	870	0.508429	1	Duodenum	Buffalos
Water_buffalos_Duodenum.4_RPKM	5.75795	0.990933	3435	14310.8	15081.1	3435	0.490201	1	Duodenum	Buffalos
Water_buffalos_Duodenum.5_RPKM	6.34014	0.994442	2783	4363.97	4546.24	2783	0.55409	1	Duodenum	Buffalos
Water_buffalos_Ileum.1_RPKM	4.79049	0.973265	2730	23035.1	23189.3	2730	0.419678	1	Ileum	Buffalos
Water_buffalos_Ileum.2_RPKM	6.21708	0.994184	3857	5250.5	5668.1	3857	0.521862	1	Ileum	Buffalos
Water_buffalos_Ileum.3_RPKM	6.64185	0.989142	7741	53430.9	56117.6	7741	0.514143	1	Ileum	Buffalos
Water_buffalos_Ileum.4_RPKM	5.35028	0.98415	2764	7350.33	7788.55	2764	0.467987	1	Ileum	Buffalos
Water_buffalos_Ileum.5_RPKM	5.36891	0.984071	6635	61076.4	65804.5	6635	0.422886	1	Ileum	Buffalos
Water_buffalos_Jejunum.1_RPKM	4.81636	0.973271	2279	9572.21	11418.6	2279	0.431799	1	Jejunum	Buffalos
Water_buffalos_Jejunum.2_RPKM	6.69176	0.996169	15816	132260	132024	15816	0.479727	1	Jejunum	Buffalos
Water_buffalos_Jejunum.3_RPKM	6.33526	0.993245	2005	2921.5	3048.94	2005	0.57754	1	Jejunum	Buffalos
Water_buffalos_Jejunum.4_RPKM	5.32449	0.98338	1385	1921.07	1885.94	1385	0.510221	1	Jejunum	Buffalos
Water_buffalos_Jejunum.5_RPKM	5.54355	0.989603	10219	168258	194065	10219	0.416215	1	Jejunum	Buffalos
Water_buffalos_Omasum.1_RPKM	6.41435	0.993723	10267	159441	137012	10267	0.481351	1	Omasum	Buffalos
Water_buffalos_Omasum.2_RPKM	7.62488	0.998422	17143	238877	218189	17143	0.542104	1	Omasum	Buffalos
Water_buffalos_Omasum.3_RPKM	6.34776	0.973557	11899	137090	133109	11899	0.468865	1	Omasum	Buffalos
Water_buffalos_Omasum.4_RPKM	6.79934	0.99562	12690	160436	157056	12690	0.4988	1	Omasum	Buffalos
Water_buffalos_Omasum.5_RPKM	7.0624	0.996984	12465	128879	130456	12465	0.51908	1	Omasum	Buffalos
Water_buffalos_Rectum.1_RPKM	6.9722	0.996656	13691	171565	183192	13691	0.507403	1	Rectum	Buffalos
Water_buffalos_Rectum.2_RPKM	7.20256	0.9979	17675	233475	273711	17675	0.510479	1	Rectum	Buffalos
Water_buffalos_Rectum.3_RPKM	5.8866	0.96947	12171	162186	169643	12171	0.433758	1	Rectum	Buffalos
Water_buffalos_Rectum.4_RPKM	5.34347	0.979514	8878	202739	206796	8878	0.4074	1	Rectum	Buffalos
Water_buffalos_Rectum.5_RPKM	6.27732	0.992815	11839	186479	221564	11839	0.463913	1	Rectum	Buffalos
Water_buffalos_Reticulum.1_RPKM	6.66994	0.996358	11905	208411	170814	11905	0.492636	1	Reticulum	Buffalos
Water_buffalos_Reticulum.2_RPKM	7.85524	0.998862	18960	264512	253962	18960	0.552771	1	Reticulum	Buffalos
Water_buffalos_Reticulum.3_RPKM	7.03143	0.99684	13402	169341	165114	13402	0.512863	1	Reticulum	Buffalos
Water_buffalos_Reticulum.4_RPKM	6.58139	0.993392	11082	124241	130169	11082	0.489835	1	Reticulum	Buffalos
Water_buffalos_Reticulum.5_RPKM	7.08403	0.997222	13056	140574	153177	13056	0.518125	1	Reticulum	Buffalos
Water_buffalos_Rumen.1_RPKM	6.50473	0.993074	12934	257730	204486	12934	0.476227	1	Rumen	Buffalos
Water_buffalos_Rumen.2_RPKM	7.78387	0.998594	21973	344240	323587	21973	0.539668	1	Rumen	Buffalos
Water_buffalos_Rumen.3_RPKM	6.99203	0.996712	15811	214513	235131	15811	0.501269	1	Rumen	Buffalos
Water_buffalos_Rumen.4_RPKM	6.88378	0.996153	16005	239780	258424	16005	0.492887	1	Rumen	Buffalos
Water_buffalos_Rumen.5_RPKM	7.02852	0.996935	15958	225105	248875	15958	0.503404	1	Rumen	Buffalos
Water_deer_Abomasum.1_RPKM	6.20275	0.994417	8374	106992	94710.2	8374	0.475974	1	Abomasum	Deer
Water_deer_Abomasum.2_RPKM	5.91885	0.992353	9207	135824	123171	9207	0.44947	1	Abomasum	Deer
Water_deer_Abomasum.3_RPKM	6.42662	0.995787	10529	152031	132837	10529	0.480959	1	Abomasum	Deer
Water_deer_Abomasum.4_RPKM	6.00907	0.992758	6796	80134.1	61584.6	6796	0.472023	1	Abomasum	Deer
Water_deer_Abomasum.5_RPKM	6.19546	0.992878	9386	125801	116153	9386	0.469485	1	Abomasum	Deer
Water_deer_Cecum.1_RPKM	6.63249	0.995598	11335	131328	140540	11335	0.492445	1	Cecum	Deer
Water_deer_Cecum.2_RPKM	6.97293	0.996165	12402	133552	133251	12402	0.51278	1	Cecum	Deer
Water_deer_Cecum.3_RPKM	7.13928	0.997252	12317	140282	131266	12317	0.525397	1	Cecum	Deer
Water_deer_Cecum.4_RPKM	6.2991	0.993893	8353	104985	98206.9	8353	0.483502	1	Cecum	Deer
Water_deer_Cecum.5_RPKM	6.52708	0.992958	10253	105950	100137	10253	0.489883	1	Cecum	Deer
Water_deer_Colon.1_RPKM	6.68923	0.996146	11213	130754	137028	11213	0.497234	1	Colon	Deer
Water_deer_Colon.2_RPKM	6.98457	0.99623	12112	126870	123859	12112	0.514929	1	Colon	Deer
Water_deer_Colon.3_RPKM	7.23166	0.99755	11810	115808	112039	11810	0.534581	1	Colon	Deer
Water_deer_Colon.4_RPKM	6.23642	0.991921	9635	130868	123891	9635	0.47124	1	Colon	Deer
Water_deer_Colon.5_RPKM	6.61315	0.992248	9436	89350.5	84240.1	9436	0.500846	1	Colon	Deer
Water_deer_Duodenum.1_RPKM	6.19144	0.992896	2313	3366.88	3376.76	2313	0.554017	1	Duodenum	Deer
Water_deer_Duodenum.2_RPKM	6.26912	0.994636	4888	27350.3	24698.2	4888	0.511555	1	Duodenum	Deer
Water_deer_Duodenum.3_RPKM	5.5506	0.974753	2453	3514.41	3730.04	2453	0.492934	1	Duodenum	Deer
Water_deer_Duodenum.4_RPKM	4.78421	0.953419	2133	3540.67	3628.92	2133	0.432621	1	Duodenum	Deer
Water_deer_Duodenum.5_RPKM	1.55821	0.359859	3167	15563.3	17042	3167	0.133995	1	Duodenum	Deer
Water_deer_Ileum.1_RPKM	4.66666	0.97093	5442	61654.8	60187.2	5442	0.376043	1	Ileum	Deer
Water_deer_Ileum.2_RPKM	4.92246	0.970564	8505	133102	122506	8505	0.377082	1	Ileum	Deer
Water_deer_Ileum.3_RPKM	4.78409	0.952618	8272	123005	110615	8272	0.36761	1	Ileum	Deer
Water_deer_Ileum.4_RPKM	4.20753	0.943762	4521	52904.7	44661.4	4521	0.346515	1	Ileum	Deer
Water_deer_Ileum.5_RPKM	2.89074	0.721918	3316	31426.7	29423.6	3316	0.247173	1	Ileum	Deer
Water_deer_Jejunum.1_RPKM	4.84257	0.974036	3652	23751.8	23076.5	3652	0.409192	1	Jejunum	Deer
Water_deer_Jejunum.2_RPKM	5.58352	0.985436	6904	65192.8	62992.1	6904	0.437813	1	Jejunum	Deer
Water_deer_Jejunum.3_RPKM	2.10031	0.529376	2614	12432.5	11233.8	2614	0.185016	1	Jejunum	Deer
Water_deer_Jejunum.4_RPKM	4.74565	0.977654	1462	2626.08	2713.5	1462	0.451377	1	Jejunum	Deer
Water_deer_Jejunum.5_RPKM	2.55784	0.67638	4006	46306.6	47429.1	4006	0.213724	1	Jejunum	Deer
Water_deer_Omasum.1_RPKM	6.28149	0.994958	8030	98848.4	85719	8030	0.484265	1	Omasum	Deer
Water_deer_Omasum.2_RPKM	6.33352	0.995355	10675	154252	132798	10675	0.473288	1	Omasum	Deer
Water_deer_Omasum.3_RPKM	5.81186	0.990986	9313	155976	141629	9313	0.440792	1	Omasum	Deer
Water_deer_Omasum.4_RPKM	5.94194	0.992116	6461	74875	61343.2	6461	0.469439	1	Omasum	Deer
Water_deer_Omasum.5_RPKM	6.23196	0.99503	8655	112295	103375	8655	0.476475	1	Omasum	Deer
Water_deer_Rectum.1_RPKM	6.71071	0.995977	11575	139282	130090	11575	0.497137	1	Rectum	Deer
Water_deer_Rectum.2_RPKM	6.98652	0.99612	12394	130186	127827	12394	0.513814	1	Rectum	Deer
Water_deer_Rectum.3_RPKM	6.96444	0.996626	11990	140957	132411	11990	0.513998	1	Rectum	Deer
Water_deer_Rectum.4_RPKM	6.32294	0.99346	10006	135441	133153	10006	0.475817	1	Rectum	Deer
Water_deer_Rectum.5_RPKM	6.9366	0.996827	10610	105528	103164	10610	0.518697	1	Rectum	Deer
Water_deer_Reticulum.1_RPKM	6.39835	0.995616	9905	135483	116305	9905	0.482023	1	Reticulum	Deer
Water_deer_Reticulum.2_RPKM	5.99739	0.992834	9854	148494	133821	9854	0.452071	1	Reticulum	Deer
Water_deer_Reticulum.3_RPKM	5.93518	0.992196	9468	142424	130893	9468	0.449334	1	Reticulum	Deer
Water_deer_Reticulum.4_RPKM	5.98449	0.991083	6247	68269.9	56580	6247	0.474623	1	Reticulum	Deer
Water_deer_Reticulum.5_RPKM	6.2906	0.995041	9522	146883	120697	9522	0.475946	1	Reticulum	Deer
Water_deer_Rumen.1_RPKM	6.20666	0.994486	9436	132514	115194	9436	0.470061	1	Rumen	Deer
Water_deer_Rumen.2_RPKM	6.43006	0.995775	12049	193203	172682	12049	0.474311	1	Rumen	Deer
Water_deer_Rumen.3_RPKM	6.00822	0.992666	11028	196686	174400	11028	0.44741	1	Rumen	Deer
Water_deer_Rumen.4_RPKM	6.01487	0.99185	7238	92958.4	75667.1	7238	0.469129	1	Rumen	Deer
Water_deer_Rumen.5_RPKM	6.30791	0.995622	10988	184687	156493	10988	0.46991	1	Rumen	Deer
Yak_Abomasum.1_RPKM	7.50075	0.998254	19197	251077	228631	19197	0.52716	1	Abomasum	Yak
Yak_Abomasum.2_RPKM	7.21183	0.998002	15204	204308	191285	15204	0.51913	1	Abomasum	Yak
Yak_Abomasum.3_RPKM	7.74292	0.998646	18377	220943	215822	18377	0.546599	1	Abomasum	Yak
Yak_Abomasum.4_RPKM	6.97907	0.992459	11068	83017.4	86190.8	11068	0.519504	1	Abomasum	Yak
Yak_Abomasum.5_RPKM	7.19068	0.996918	17714	211099	187659	17714	0.509522	1	Abomasum	Yak
Yak_Cecum.1_RPKM	6.98354	0.996398	18557	284110	266113	18557	0.492504	1	Cecum	Yak
Yak_Cecum.2_RPKM	6.4498	0.994106	15405	220537	250729	15405	0.463644	1	Cecum	Yak
Yak_Cecum.3_RPKM	7.3524	0.998196	19220	268310	249547	19220	0.516671	1	Cecum	Yak
Yak_Cecum.4_RPKM	6.88071	0.996791	14971	223683	242615	14971	0.49609	1	Cecum	Yak
Yak_Cecum.5_RPKM	7.1765	0.997062	16530	183146	165339	16530	0.512139	1	Cecum	Yak
Yak_Colon.1_RPKM	6.00368	0.991253	4415	13076.1	14832.7	4415	0.495836	1	Colon	Yak
Yak_Colon.2_RPKM	6.43056	0.99394	14823	218508	234237	14823	0.464114	1	Colon	Yak
Yak_Colon.3_RPKM	7.21851	0.998055	17940	232944	226162	17940	0.510832	1	Colon	Yak
Yak_Colon.4_RPKM	7.0674	0.997131	15520	192059	214959	15520	0.507648	1	Colon	Yak
Yak_Colon.5_RPKM	7.19565	0.996971	14538	129899	122596	14538	0.520385	1	Colon	Yak
Yak_Duodenum.1_RPKM	6.35726	0.993933	17089	296543	321184	17089	0.452127	1	Duodenum	Yak
Yak_Duodenum.2_RPKM	5.74629	0.989	4275	10889.4	12220.3	4275	0.476408	1	Duodenum	Yak
Yak_Duodenum.3_RPKM	6.76032	0.996341	22356	500744	457628	22356	0.467895	1	Duodenum	Yak
Yak_Duodenum.4_RPKM	6.15177	0.994412	1380	1501.62	1481.34	1380	0.58979	1	Duodenum	Yak
Yak_Duodenum.5_RPKM	6.55692	0.995626	2785	3499.3	3518.41	2785	0.572984	1	Duodenum	Yak
Yak_Ileum.1_RPKM	6.01171	0.992139	1215	1303.11	1304.16	1215	0.586695	1	Ileum	Yak
Yak_Ileum.2_RPKM	5.6218	0.987215	5585	28694.4	30256.6	5585	0.451647	1	Ileum	Yak
Yak_Ileum.3_RPKM	6.55519	0.995649	2855	3465.85	3530.4	2855	0.571045	1	Ileum	Yak
Yak_Ileum.4_RPKM	6.20873	0.9933	4242	7389.97	7954.22	4242	0.515225	1	Ileum	Yak
Yak_Ileum.5_RPKM	6.42124	0.99496	3052	4674.16	4686.09	3052	0.554725	1	Ileum	Yak
Yak_Jejunum.1_RPKM	6.08998	0.991166	4468	12877	14200.9	4468	0.502249	1	Jejunum	Yak
Yak_Jejunum.2_RPKM	5.39641	0.986993	3567	12816.3	13269.5	3567	0.457304	1	Jejunum	Yak
Yak_Jejunum.3_RPKM	6.70332	0.996135	7049	29341.9	31527.8	7049	0.524385	1	Jejunum	Yak
Yak_Jejunum.4_RPKM	5.84323	0.988866	907	942.485	953.027	907	0.594733	1	Jejunum	Yak
Yak_Jejunum.5_RPKM	6.62048	0.995443	18874	527550	328796	18874	0.466096	1	Jejunum	Yak
Yak_Omasum.1_RPKM	7.50472	0.998408	18562	235556	226038	18562	0.529244	1	Omasum	Yak
Yak_Omasum.2_RPKM	7.14381	0.997911	15062	228985	202980	15062	0.514734	1	Omasum	Yak
Yak_Omasum.3_RPKM	7.64187	0.997913	21318	258484	250169	21318	0.531432	1	Omasum	Yak
Yak_Omasum.4_RPKM	7.20093	0.997163	18315	254860	250993	18315	0.508514	1	Omasum	Yak
Yak_Omasum.5_RPKM	7.30044	0.997553	19969	265566	238561	19969	0.511039	1	Omasum	Yak
Yak_Rectum.1_RPKM	6.81964	0.995566	19947	381127	342353	19947	0.477436	1	Rectum	Yak
Yak_Rectum.2_RPKM	6.34771	0.993689	14694	235495	242200	14694	0.458552	1	Rectum	Yak
Yak_Rectum.3_RPKM	7.12473	0.997704	17957	250047	237284	17957	0.504147	1	Rectum	Yak
Yak_Rectum.4_RPKM	6.86353	0.996448	16876	251541	290901	16876	0.488762	1	Rectum	Yak
Yak_Rectum.5_RPKM	6.97936	0.996208	18290	253237	227024	18290	0.492936	1	Rectum	Yak
Yak_Reticulum.1_RPKM	7.53391	0.998404	18856	233593	227049	18856	0.530455	1	Reticulum	Yak
Yak_Reticulum.2_RPKM	7.21515	0.99811	14324	201751	181479	14324	0.522604	1	Reticulum	Yak
Yak_Reticulum.3_RPKM	7.60407	0.998041	19972	232243	225298	19972	0.532285	1	Reticulum	Yak
Yak_Reticulum.4_RPKM	7.3828	0.997859	17821	260139	238520	17821	0.522814	1	Reticulum	Yak
Yak_Reticulum.5_RPKM	7.38071	0.997223	18583	223498	183904	18583	0.520439	1	Reticulum	Yak
Yak_Rumen.1_RPKM	7.54793	0.998445	21242	295790	292482	21242	0.525087	1	Rumen	Yak
Yak_Rumen.2_RPKM	7.21596	0.997981	17949	326296	290735	17949	0.510625	1	Rumen	Yak
Yak_Rumen.3_RPKM	7.54665	0.99751	22570	316962	305230	22570	0.521822	1	Rumen	Yak
Yak_Rumen.4_RPKM	7.17206	0.996809	21298	361952	363874	21298	0.498807	1	Rumen	Yak
Yak_Rumen.5_RPKM	7.33445	0.997573	21335	305660	267711	21335	0.510012	1	Rumen	Yak
