# Supplementary material for: Spatial heterogeneity of viral communities across the gastrointestinal tracts of ruminants
Source: Research Square preprint supplement (doi:10.21203/rs.3.rs-4244627/v1), 2024-04-10
Supplement: Supplementary file 10 [file 7cd9729dc7c78b73308106c4.xlsx]

## Sheet: Table S27
Table S27. Results of host prediction by CrisprOpenDB
vOTUs	Host	Level
RGVC1	Neisseria	1
RGVC2	Neisseria	2
RGVC13	Klebsiella	3
RGVC16	Bacteroides	1
RGVC22	Clostridioides	3
RGVC31	Ruminococcus	1
RGVC32	Klebsiella	3
RGVC42	Klebsiella	3
RGVC45	Ruminococcus	3
RGVC51	Clostridioides	3
RGVC53	Mycoplasma	3
RGVC56	Ruminococcus	3
RGVC63	Clostridioides	3
RGVC64	Neisseria	1
RGVC65	Klebsiella	2
RGVC68	Acidaminococcus	1
RGVC74	Clostridioides	3
RGVC82	Klebsiella	3
RGVC84	Mycoplasma	3
RGVC89	Neisseria	1
RGVC97	Mycoplasma	3
RGVC107	Neisseria	1
RGVC114	Mycoplasma	3
RGVC115	Ruminococcus	3
RGVC116	Bacteroides	3
RGVC121	Treponema	1
RGVC124	Klebsiella	2
RGVC125	Klebsiella	1
RGVC128	Intestinimonas	3
RGVC130	Clostridioides	3
RGVC133	Ruminococcus	3
RGVC136	Neisseria	1
RGVC155	Ruminococcus	3
RGVC156	Ruminococcus	1
RGVC157	Neisseria	1
RGVC165	Neisseria	1
RGVC166	Klebsiella	2
RGVC171	Roseburia	1
RGVC178	Ruminococcus	3
RGVC184	Clostridioides	3
RGVC191	Bacteroides	2
RGVC194	Mycoplasma	3
RGVC197	Klebsiella	3
RGVC208	Clostridioides	3
RGVC211	Clostridioides	3
RGVC212	Clostridioides	3
RGVC216	Klebsiella	3
RGVC228	Klebsiella	3
RGVC235	Coprobacillus	1
RGVC240	Bacteroides	3
RGVC249	Klebsiella	3
RGVC272	Clostridioides	3
RGVC273	Klebsiella	2
RGVC276	Mycoplasma	3
RGVC281	Neisseria	1
RGVC285	Klebsiella	3
RGVC288	Klebsiella	2
RGVC289	Lactobacillus	3
RGVC290	Mycoplasma	3
RGVC294	Klebsiella	3
RGVC303	Bacteroides	3
RGVC304	Mycoplasma	3
RGVC306	Acinetobacter	3
RGVC307	Bacteroides	1
RGVC311	Klebsiella	3
RGVC321	Klebsiella	2
RGVC324	Clostridioides	3
RGVC332	Neisseria	1
RGVC338	Klebsiella	3
RGVC348	Klebsiella	2
RGVC351	Mycoplasma	1
RGVC356	Bacteroides	3
RGVC358	Mycoplasma	3
RGVC369	Intestinimonas	1
RGVC370	Neisseria	1
RGVC379	Ruminococcus	1
RGVC383	Clostridioides	3
RGVC389	Parabacteroides	2
RGVC396	Lactobacillus	3
RGVC407	Clostridioides	3
RGVC411	Clostridioides	3
RGVC412	Neisseria	1
RGVC414	Clostridioides	3
RGVC420	Klebsiella	1
RGVC421	Neisseria	1
RGVC423	Pseudomonas	3
RGVC427	Neisseria	1
RGVC429	Klebsiella	2
RGVC443	Neisseria	1
RGVC446	Clostridioides	3
RGVC454	Salmonella	1
RGVC460	Clostridioides	3
RGVC463	Pseudomonas	3
RGVC466	Ruminococcus	3
RGVC470	Clostridioides	3
RGVC477	Clostridioides	3
RGVC481	Blautia	3
RGVC486	Neisseria	1
RGVC493	Klebsiella	2
RGVC501	Mycoplasma	3
RGVC502	Klebsiella	1
RGVC506	Neisseria	1
RGVC510	Intestinimonas	1
RGVC511	Klebsiella	2
RGVC513	Klebsiella	2
RGVC516	Clostridioides	3
RGVC522	Odoribacter	1
RGVC524	Clostridioides	3
RGVC532	Clostridioides	3
RGVC535	Klebsiella	3
RGVC539	Mycoplasma	3
RGVC546	Mycoplasma	3
RGVC550	Bacteroides	3
RGVC552	Neisseria	1
RGVC558	Salmonella	2
RGVC559	Clostridium	1
RGVC564	Neisseria	1
RGVC579	Mycoplasma	3
RGVC585	Klebsiella	1
RGVC592	Clostridioides	3
RGVC595	Klebsiella	3
RGVC598	Klebsiella	2
RGVC599	Klebsiella	3
RGVC601	Neisseria	1
RGVC603	Neisseria	1
RGVC620	Klebsiella	3
RGVC621	Lactobacillus	3
RGVC630	Intestinimonas	2
RGVC631	Mycoplasma	3
RGVC632	Clostridioides	3
RGVC633	Neisseria	1
RGVC635	Ruminococcus	3
RGVC644	Mycoplasma	3
RGVC647	Clostridioides	3
RGVC651	Neisseria	1
RGVC659	Anaerostipes	1
RGVC661	Clostridioides	3
RGVC663	Clostridioides	3
RGVC669	Clostridioides	3
RGVC678	Klebsiella	1
RGVC683	Eubacterium	1
RGVC686	Butyricimonas	3
RGVC688	Clostridioides	3
RGVC692	Neisseria	1
RGVC704	Klebsiella	2
RGVC714	Neisseria	1
RGVC715	Neisseria	1
RGVC723	Salmonella	2
RGVC729	Clostridioides	3
RGVC742	Clostridioides	3
RGVC750	Klebsiella	1
RGVC751	Intestinimonas	1
RGVC755	Salmonella	1
RGVC756	Klebsiella	3
RGVC759	Mycoplasma	3
RGVC760	Mycoplasma	3
RGVC763	Clostridioides	3
RGVC765	Ruminococcus	3
RGVC774	Neisseria	1
RGVC780	Mycoplasma	3
RGVC785	Escherichia	2
RGVC788	Prevotella	1
RGVC800	Neisseria	1
RGVC801	Mycoplasma	3
RGVC802	Coprobacillus	1
RGVC804	Coprobacillus	1
RGVC806	Mycoplasma	3
RGVC808	Neisseria	1
RGVC813	Olsenella	2
RGVC815	Klebsiella	2
RGVC817	Neisseria	1
RGVC821	Neisseria	1
RGVC823	Mycoplasma	3
RGVC826	Klebsiella	3
RGVC830	Clostridioides	3
RGVC832	Klebsiella	3
RGVC836	Mycoplasma	3
RGVC838	Neisseria	1
RGVC855	Mycoplasma	3
RGVC856	Neisseria	1
RGVC859	Klebsiella	3
RGVC863	Neisseria	1
RGVC868	Klebsiella	3
RGVC871	Clostridioides	3
RGVC875	Neisseria	1
RGVC877	Klebsiella	3
RGVC878	Mycoplasma	3
RGVC890	Lactobacillus	3
RGVC901	Neisseria	1
RGVC911	Clostridioides	3
RGVC917	Bacteroides	2
RGVC924	Mycoplasma	3
RGVC925	Klebsiella	3
RGVC931	Clostridioides	3
RGVC936	Clostridioides	3
RGVC939	Mycoplasma	3
RGVC945	Mycoplasma	3
RGVC946	Mycoplasma	3
RGVC950	Coprobacillus	1
RGVC965	Klebsiella	3
RGVC973	Pseudomonas	3
RGVC974	Neisseria	1
RGVC978	Klebsiella	2
RGVC979	Lactobacillus	3
RGVC980	Coprobacillus	1
RGVC986	Pseudomonas	3
RGVC991	Clostridioides	3
RGVC995	Clostridioides	3
RGVC999	Mycoplasma	3
RGVC1002	Escherichia	1
RGVC1008	Clostridioides	3
RGVC1013	Neisseria	1
RGVC1026	Clostridium	3
RGVC1031	Mycoplasma	3
RGVC1032	Mycoplasma	3
RGVC1033	Klebsiella	2
RGVC1034	Pseudomonas	3
RGVC1037	Clostridioides	1
RGVC1046	Coprobacillus	1
RGVC1047	Neisseria	1
RGVC1057	Neisseria	1
RGVC1059	Clostridioides	3
RGVC1060	Ruminococcus	1
RGVC1061	Prevotella	1
RGVC1062	Klebsiella	2
RGVC1063	Clostridioides	3
RGVC1066	Klebsiella	2
RGVC1068	Parabacteroides	2
RGVC1069	Klebsiella	2
RGVC1072	Klebsiella	2
RGVC1075	Acinetobacter	1
RGVC1079	Neisseria	1
RGVC1081	Neisseria	1
RGVC1083	Mycoplasma	3
RGVC1087	Lactobacillus	3
RGVC1093	Klebsiella	2
RGVC1096	Klebsiella	2
RGVC1099	Neisseria	2
RGVC1108	Klebsiella	2
RGVC1117	Neisseria	1
RGVC1124	Clostridioides	3
RGVC1128	Mycoplasma	3
RGVC1137	Neisseria	1
RGVC1143	Klebsiella	3
RGVC1144	Clostridioides	3
RGVC1147	Klebsiella	3
RGVC1149	Bacteroides	2
RGVC1151	Klebsiella	2
RGVC1155	Klebsiella	2
RGVC1158	Lactobacillus	3
RGVC1160	Klebsiella	2
RGVC1163	Roseburia	1
RGVC1188	Clostridioides	3
RGVC1189	Bacteroides	3
RGVC1194	Klebsiella	3
RGVC1205	Klebsiella	3
RGVC1209	Neisseria	1
RGVC1210	Clostridioides	3
RGVC1212	Clostridioides	3
RGVC1218	Desulfovibrio	1
RGVC1219	Klebsiella	3
RGVC1227	Klebsiella	2
RGVC1231	Ruminococcus	3
RGVC1234	Clostridioides	3
RGVC1235	Lawsonibacter	1
RGVC1236	Prevotella	1
RGVC1240	Ruminococcus	3
RGVC1241	Ruminococcus	3
RGVC1245	Clostridioides	3
RGVC1264	Klebsiella	2
RGVC1275	Mycoplasma	3
RGVC1278	Klebsiella	2
RGVC1281	Clostridioides	3
RGVC1282	Clostridioides	3
RGVC1287	Neisseria	1
RGVC1301	Mycoplasma	3
RGVC1303	Neisseria	1
RGVC1306	Klebsiella	2
RGVC1309	Mycoplasma	3
RGVC1313	Mycoplasma	3
RGVC1318	Mycoplasma	1
RGVC1323	Bacteroides	2
RGVC1335	Clostridioides	3
RGVC1337	Klebsiella	2
RGVC1340	Mycoplasma	3
RGVC1347	Klebsiella	3
RGVC1361	Butyricimonas	1
RGVC1363	Mycoplasma	3
RGVC1371	Mycoplasma	3
RGVC1380	Mycoplasma	3
RGVC1382	Escherichia	2
RGVC1388	Klebsiella	1
RGVC1392	Neisseria	1
RGVC1401	Klebsiella	3
RGVC1405	Ruminococcus	1
RGVC1414	Clostridioides	3
RGVC1415	Klebsiella	3
RGVC1417	Clostridioides	3
RGVC1431	Holdemania	1
RGVC1436	Mycoplasma	3
RGVC1438	Ruminococcus	3
RGVC1439	Ruminococcus	1
RGVC1451	Mycoplasma	3
RGVC1453	Clostridioides	3
RGVC1458	Neisseria	1
RGVC1463	Neisseria	1
RGVC1470	Clostridioides	3
RGVC1472	Neisseria	1
RGVC1473	Lactobacillus	3
RGVC1479	Clostridioides	3
RGVC1480	Clostridioides	3
RGVC1485	Neisseria	1
RGVC1487	Mycoplasma	3
RGVC1493	Neisseria	1
RGVC1510	Clostridioides	3
RGVC1516	Klebsiella	3
RGVC1523	Klebsiella	1
RGVC1533	Neisseria	1
RGVC1535	Klebsiella	3
RGVC1537	Neisseria	1
RGVC1538	UNKNOWN	4
RGVC1542	Mycoplasma	3
RGVC1554	Pseudomonas	3
RGVC1560	Acinetobacter	1
RGVC1564	Klebsiella	3
RGVC1570	Escherichia	1
RGVC1572	Clostridioides	3
RGVC1573	Prevotella	1
RGVC1576	Klebsiella	3
RGVC1580	Coprobacillus	3
RGVC1591	Acidaminococcus	1
RGVC1592	Neisseria	1
RGVC1596	Bacteroides	1
RGVC1597	Clostridioides	3
RGVC1599	Mycoplasma	3
RGVC1600	Neisseria	1
RGVC1618	Clostridioides	3
RGVC1634	Clostridioides	3
RGVC1636	Clostridioides	3
RGVC1644	Klebsiella	3
RGVC1647	Acinetobacter	1
RGVC1656	Klebsiella	3
RGVC1660	Mycoplasma	3
RGVC1661	Neisseria	1
RGVC1668	Ruminococcus	1
RGVC1673	Coprobacillus	1
RGVC1675	Klebsiella	2
RGVC1676	Neisseria	1
RGVC1683	Prevotella	1
RGVC1685	Mycoplasma	3
RGVC1690	Mycoplasma	3
RGVC1697	Klebsiella	2
RGVC1716	Clostridioides	3
RGVC1733	Mycoplasma	3
RGVC1738	Mycoplasma	3
RGVC1741	Clostridioides	3
RGVC1746	Ruminococcus	3
RGVC1747	Neisseria	1
RGVC1748	Streptococcus	1
RGVC1757	Klebsiella	3
RGVC1760	Clostridium	1
RGVC1763	Clostridioides	3
RGVC1774	Neisseria	1
RGVC1775	Lactobacillus	3
RGVC1776	Coprobacillus	3
RGVC1777	Clostridium	3
RGVC1795	Lactobacillus	3
RGVC1812	Klebsiella	2
RGVC1815	Klebsiella	2
RGVC1821	Mycoplasma	3
RGVC1822	Pseudomonas	3
RGVC1827	Neisseria	1
RGVC1829	Ruminococcus	3
RGVC1833	Neisseria	1
RGVC1834	Lachnoclostridium	1
RGVC1838	Salmonella	2
RGVC1852	Clostridioides	3
RGVC1854	Klebsiella	2
RGVC1855	Clostridioides	3
RGVC1862	Anaerostipes	1
RGVC1864	Klebsiella	3
RGVC1868	Neisseria	1
RGVC1869	Bacteroides	1
RGVC1876	Blautia	3
RGVC1878	Klebsiella	3
RGVC1879	Klebsiella	2
RGVC1882	Klebsiella	3
RGVC1890	Neisseria	1
RGVC1916	Clostridioides	3
RGVC1922	Mycoplasma	3
RGVC1924	Aeribacillus	3
RGVC1925	Neisseria	1
RGVC1930	Mycoplasma	3
RGVC1931	Coprobacillus	1
RGVC1933	Neisseria	1
RGVC1939	Klebsiella	2
RGVC1945	Klebsiella	3
RGVC1950	Neisseria	1
RGVC1961	Klebsiella	2
RGVC1966	Coprobacillus	1
RGVC1973	Clostridioides	3
RGVC1988	Prevotella	1
RGVC1992	Mycoplasma	3
RGVC1998	Klebsiella	2
RGVC2015	Clostridioides	3
RGVC2022	Mycoplasma	3
RGVC2025	Neisseria	1
RGVC2026	Clostridioides	3
RGVC2027	Klebsiella	2
RGVC2028	Escherichia	1
RGVC2036	Clostridioides	3
RGVC2037	Klebsiella	2
RGVC2039	Neisseria	1
RGVC2053	Clostridioides	3
RGVC2055	Bacteroides	1
RGVC2060	Coprobacillus	1
RGVC2065	Mycoplasma	3
RGVC2067	Klebsiella	2
RGVC2068	Ruminococcus	3
RGVC2074	Clostridioides	3
RGVC2082	Klebsiella	3
RGVC2083	Klebsiella	3
RGVC2091	Klebsiella	2
RGVC2102	Bacteroides	1
RGVC2110	Mycoplasma	3
RGVC2115	Neisseria	1
RGVC2131	Clostridioides	3
RGVC2136	Ruminococcus	1
RGVC2142	Klebsiella	3
RGVC2146	Clostridioides	3
RGVC2148	Prevotella	1
RGVC2150	Coprobacillus	1
RGVC2151	Klebsiella	2
RGVC2152	Clostridium	3
RGVC2155	Neisseria	1
RGVC2158	Lactobacillus	3
RGVC2162	Salmonella	1
RGVC2170	Neisseria	1
RGVC2171	Eubacterium	3
RGVC2178	Coprobacillus	1
RGVC2179	Neisseria	1
RGVC2183	Clostridium	1
RGVC2187	Mycoplasma	3
RGVC2192	Klebsiella	3
RGVC2193	Mycoplasma	3
RGVC2200	Neisseria	1
RGVC2204	Lactobacillus	3
RGVC2214	Klebsiella	3
RGVC2244	Mycoplasma	3
RGVC2245	Clostridioides	3
RGVC2250	Mycoplasma	3
RGVC2263	Neisseria	1
RGVC2265	Klebsiella	2
RGVC2270	Klebsiella	2
RGVC2273	Prevotella	1
RGVC2284	Clostridioides	3
RGVC2297	Clostridioides	3
RGVC2298	Bacteroides	1
RGVC2303	Klebsiella	2
RGVC2321	Salmonella	2
RGVC2327	Clostridioides	3
RGVC2328	Clostridium	2
RGVC2331	Clostridioides	3
RGVC2351	Blautia	3
RGVC2373	Neisseria	1
RGVC2377	Klebsiella	1
RGVC2379	Prevotella	1
RGVC2386	Klebsiella	3
RGVC2387	Klebsiella	2
RGVC2388	Mycoplasma	3
RGVC2404	Klebsiella	2
RGVC2405	Ruminococcus	3
RGVC2409	Ruminococcus	3
RGVC2410	Escherichia	1
RGVC2420	Anaeromassilibacillus	1
RGVC2425	Clostridioides	3
RGVC2431	Prevotella	1
RGVC2433	Neisseria	1
RGVC2434	Clostridium	2
RGVC2438	Klebsiella	3
RGVC2453	Clostridioides	3
RGVC2455	Ruminococcus	3
RGVC2458	Neisseria	2
RGVC2475	Prevotella	1
RGVC2478	Klebsiella	3
RGVC2479	Clostridioides	3
RGVC2488	Mycoplasma	3
RGVC2494	Clostridioides	3
RGVC2495	Clostridioides	3
RGVC2498	Clostridioides	3
RGVC2501	Mycoplasma	3
RGVC2505	Neisseria	1
RGVC2506	Prevotella	1
RGVC2513	Prevotella	1
RGVC2517	Coprobacillus	1
RGVC2518	Coprobacillus	3
RGVC2519	Lachnoclostridium	1
RGVC2520	Odoribacter	1
RGVC2529	Bacteroides	1
RGVC2535	Klebsiella	3
RGVC2536	Mycoplasma	3
RGVC2550	Neisseria	1
RGVC2553	Neisseria	1
RGVC2555	Neisseria	2
RGVC2558	Neisseria	2
RGVC2571	Klebsiella	3
RGVC2579	Salmonella	2
RGVC2590	Lawsonibacter	1
RGVC2591	Lachnoclostridium	1
RGVC2593	Clostridioides	3
RGVC2598	Clostridioides	3
RGVC2599	Neisseria	1
RGVC2603	Ruminococcus	3
RGVC2606	Ruminococcus	3
RGVC2612	Mycoplasma	3
RGVC2619	Escherichia	1
RGVC2623	Mycoplasma	3
RGVC2628	Prevotella	1
RGVC2630	Clostridioides	3
RGVC2631	Lachnospira	2
RGVC2637	Mycoplasma	3
RGVC2639	Neisseria	1
RGVC2645	Coprobacillus	3
RGVC2649	Clostridioides	3
RGVC2660	Clostridioides	3
RGVC2670	Clostridioides	3
RGVC2675	Prevotella	1
RGVC2685	Escherichia	1
RGVC2686	Mycoplasma	3
RGVC2690	Prevotella	1
RGVC2691	Tyzzerella	1
RGVC2693	Bacteroides	1
RGVC2694	Salmonella	2
RGVC2697	Klebsiella	1
RGVC2703	Klebsiella	2
RGVC2715	Prevotella	1
RGVC2732	Neisseria	1
RGVC2733	Neisseria	1
RGVC2734	Clostridioides	3
RGVC2736	Neisseria	2
RGVC2745	Clostridioides	3
RGVC2750	Clostridioides	3
RGVC2754	Klebsiella	2
RGVC2768	Prevotella	1
RGVC2780	Neisseria	1
RGVC2785	Neisseria	1
RGVC2786	Clostridioides	3
RGVC2793	Pseudomonas	3
RGVC2798	Klebsiella	3
RGVC2800	Prevotella	1
RGVC2801	Bacteroidales	4
RGVC2812	Ruminococcus	3
RGVC2814	Thermincola	1
RGVC2817	Mycoplasma	3
RGVC2831	Salmonella	2
RGVC2836	Klebsiella	3
RGVC2838	Klebsiella	2
RGVC2854	Prevotella	1
RGVC2856	Neisseria	1
RGVC2860	Anaerovibrio	1
RGVC2864	Neisseria	1
RGVC2871	Klebsiella	2
RGVC2882	Mycoplasma	3
RGVC2889	Neisseria	1
RGVC2892	Mycoplasma	3
RGVC2894	Mycoplasma	3
RGVC2903	Clostridioides	3
RGVC2905	Clostridioides	3
RGVC2907	Enterobacter	2
RGVC2914	Clostridioides	3
RGVC2931	Klebsiella	3
RGVC2934	Desulfovibrio	1
RGVC2937	Klebsiella	3
RGVC2938	Klebsiella	2
RGVC2944	Klebsiella	2
RGVC2945	Klebsiella	2
RGVC2948	Escherichia	1
RGVC2950	Lawsonibacter	1
RGVC2951	Klebsiella	3
RGVC2959	Salmonella	2
RGVC2965	Klebsiella	2
RGVC2968	Bacteroides	3
RGVC2969	Klebsiella	3
RGVC2971	Clostridioides	3
RGVC2994	Bacteroides	3
RGVC3003	Neisseria	1
RGVC3004	Klebsiella	3
RGVC3008	Clostridioides	3
RGVC3015	Klebsiella	2
RGVC3029	Desulfovibrio	1
RGVC3030	Clostridioides	3
RGVC3031	Clostridium	1
RGVC3034	Dysosmobacter	3
RGVC3035	Pseudomonas	3
RGVC3045	Campylobacter	3
RGVC3051	Mycoplasma	3
RGVC3053	Bacteroides	3
RGVC3054	Salmonella	3
RGVC3062	Bacteroides	1
RGVC3068	Klebsiella	2
RGVC3079	Neisseria	1
RGVC3082	Escherichia	1
RGVC3095	Neisseria	1
RGVC3107	Prevotella	1
RGVC3119	Neisseria	1
RGVC3121	Clostridioides	3
RGVC3140	Mycoplasma	3
RGVC3144	Klebsiella	3
RGVC3146	Mycoplasma	3
RGVC3147	Clostridioides	3
RGVC3163	Bacteroides	1
RGVC3166	Neisseria	1
RGVC3167	Neisseria	2
RGVC3172	Klebsiella	2
RGVC3181	Neisseria	1
RGVC3184	Butyricimonas	1
RGVC3193	Clostridioides	3
RGVC3201	Clostridioides	3
RGVC3211	Salmonella	2
RGVC3219	Campylobacter	1
RGVC3222	Coprobacillus	1
RGVC3226	Alistipes	1
RGVC3229	Neisseria	1
RGVC3237	Klebsiella	3
RGVC3241	Klebsiella	3
RGVC3244	Clostridioides	3
RGVC3246	Neisseria	1
RGVC3249	Bacteroides	2
RGVC3283	Ruminococcus	3
RGVC3287	Clostridioides	3
RGVC3288	Bacteroides	1
RGVC3308	Klebsiella	2
RGVC3309	Salmonella	1
RGVC3310	Escherichia	3
RGVC3314	Neisseria	1
RGVC3322	Prevotella	1
RGVC3327	Mycoplasma	3
RGVC3332	Neisseria	1
RGVC3335	Clostridioides	3
RGVC3352	Klebsiella	2
RGVC3373	Coprobacillus	1
RGVC3378	Clostridioides	3
RGVC3379	Klebsiella	1
RGVC3381	Ruminococcus	3
RGVC3386	Neisseria	1
RGVC3390	Parabacteroides	2
RGVC3404	Clostridioides	3
RGVC3406	Ruminococcus	3
RGVC3412	Neisseria	1
RGVC3418	Ruminococcus	3
RGVC3421	Mycoplasma	3
RGVC3433	Prevotella	1
RGVC3449	Parabacteroides	1
RGVC3450	Klebsiella	3
RGVC3457	Pseudomonas	3
RGVC3478	Escherichia	1
RGVC3493	Acinetobacter	1
RGVC3499	Prevotella	1
RGVC3500	Intestinimonas	2
RGVC3503	Ruminococcus	3
RGVC3511	Klebsiella	2
RGVC3515	Mycoplasma	3
RGVC3525	Clostridioides	3
RGVC3532	Bacteroides	2
RGVC3540	Clostridioides	3
RGVC3561	Neisseria	1
RGVC3564	Neisseria	1
RGVC3567	Bacteroides	1
RGVC3572	Klebsiella	1
RGVC3576	Clostridioides	3
RGVC3577	Ruminococcus	3
RGVC3590	Intestinimonas	2
RGVC3592	Clostridioides	3
RGVC3601	Klebsiella	1
RGVC3602	Desulfovibrio	1
RGVC3613	Bacteroides	1
RGVC3615	Neisseria	1
RGVC3616	Mycoplasma	3
RGVC3621	Ruminococcus	1
RGVC3624	Romboutsia	1
RGVC3629	Klebsiella	2
RGVC3630	Klebsiella	2
RGVC3639	Klebsiella	3
RGVC3644	Clostridioides	3
RGVC3663	Mycoplasma	3
RGVC3664	Parabacteroides	2
RGVC3679	Klebsiella	3
RGVC3686	Ruminococcus	1
RGVC3687	Neisseria	1
RGVC3689	Salmonella	1
RGVC3690	Eubacterium	2
RGVC3693	Lactobacillus	3
RGVC3698	Clostridium	1
RGVC3704	Mycoplasma	1
RGVC3707	Prevotella	1
RGVC3712	Klebsiella	2
RGVC3720	Neisseria	1
RGVC3749	Clostridium	2
RGVC3750	Clostridioides	3
RGVC3764	Streptococcus	1
RGVC3765	Salmonella	1
RGVC3784	Salmonella	1
RGVC3785	Ruminococcus	3
RGVC3801	Clostridioides	3
RGVC3803	Salmonella	2
RGVC3809	Eubacterium	2
RGVC3813	Clostridioides	3
RGVC3823	Clostridioides	3
RGVC3834	Clostridioides	3
RGVC3841	Neisseria	1
RGVC3847	Eubacterium	2
RGVC3854	Eubacterium	2
RGVC3879	Blautia	1
RGVC3882	Neisseria	1
RGVC3890	Klebsiella	3
RGVC3899	Clostridioides	3
RGVC3901	Eubacterium	2
RGVC3929	Intestinimonas	2
RGVC3938	Bacteroides	1
RGVC3952	Aeromicrobium	1
RGVC3964	Mycoplasma	3
RGVC4026	Anaerovibrio	1
RGVC4036	Neisseria	1
RGVC4040	Prevotella	1
RGVC4059	Clostridium	1
RGVC4079	Gemella	1
RGVC4087	Ruminococcus	3
RGVC4093	Clostridioides	3
RGVC4099	Klebsiella	2
RGVC4102	Bacteroides	1
RGVC4121	Mycoplasma	3
RGVC4140	Klebsiella	2
RGVC4147	Clostridioides	3
RGVC4168	Klebsiella	2
RGVC4186	Desulfovibrio	1
RGVC4213	Lachnoclostridium	1
RGVC4218	Mycoplasma	3
RGVC4235	Neisseria	1
RGVC4241	Klebsiella	1
RGVC4246	Mycoplasma	3
RGVC4260	Clostridioides	3
RGVC4280	Galactobacillus	1
RGVC4285	Mycoplasma	3
RGVC4286	Thermincola	1
RGVC4324	Neisseria	1
RGVC4344	Escherichia	1
RGVC4378	Bacteroides	1
RGVC4386	Mycoplasma	3
RGVC4395	Clostridioides	3
RGVC4409	Neisseria	2
RGVC4414	Salmonella	2
RGVC4417	Salmonella	2
RGVC4421	Klebsiella	3
RGVC4432	Klebsiella	2
RGVC4441	Klebsiella	2
RGVC4445	Klebsiella	2
RGVC4450	Mycoplasma	3
RGVC4458	Ruminococcus	3
RGVC4459	Neisseria	2
RGVC4461	Neisseria	1
RGVC4475	Ruminococcus	3
RGVC4479	Clostridioides	3
RGVC4488	Neisseria	1
RGVC4491	Clostridioides	3
RGVC4495	Klebsiella	1
RGVC4499	Mycoplasma	3
RGVC4504	Neisseria	2
RGVC4509	Coprobacillus	1
RGVC4518	Clostridioides	3
RGVC4520	Neisseria	1
RGVC4540	Klebsiella	3
RGVC4548	Klebsiella	3
RGVC4555	Mycoplasma	3
RGVC4579	Clostridioides	3
RGVC4581	Bacteroides	1
RGVC4589	Neisseria	2
RGVC4596	Prevotella	1
RGVC4610	Neisseria	1
RGVC4616	Ruminococcus	3
RGVC4619	Klebsiella	2
RGVC4622	Klebsiella	3
RGVC4623	Alistipes	1
RGVC4625	Neisseria	1
RGVC4630	Klebsiella	3
RGVC4632	Klebsiella	3
RGVC4634	Klebsiella	3
RGVC4635	Neisseria	1
RGVC4642	Klebsiella	3
RGVC4654	Ruminococcus	1
RGVC4659	Klebsiella	2
RGVC4662	Klebsiella	3
RGVC4676	Clostridioides	3
RGVC4680	Mycoplasma	3
RGVC4682	Clostridioides	3
RGVC4690	Clostridioides	3
RGVC4691	Ruminococcus	1
RGVC4699	Klebsiella	2
RGVC4714	Mycoplasma	3
RGVC4716	Clostridioides	3
RGVC4717	Mycoplasma	3
RGVC4722	Neisseria	1
RGVC4724	Ruminococcus	3
RGVC4728	Clostridium	3
RGVC4729	Klebsiella	3
RGVC4732	Mycoplasma	3
RGVC4740	Neisseria	1
RGVC4743	Neisseria	1
RGVC4744	Mycoplasma	3
RGVC4745	Klebsiella	2
RGVC4752	Pseudoflavonifractor	1
RGVC4753	Neisseria	1
RGVC4754	Prevotella	1
RGVC4758	Klebsiella	3
RGVC4760	Pseudoflavonifractor	1
RGVC4763	Klebsiella	2
RGVC4768	Mycoplasma	3
RGVC4770	Clostridioides	3
RGVC4772	Bilophila	1
RGVC4779	Klebsiella	1
RGVC4794	Coprobacillus	3
RGVC4810	Klebsiella	2
RGVC4813	Clostridioides	3
RGVC4815	Neisseria	1
RGVC4830	Clostridioides	3
RGVC4834	Clostridioides	3
RGVC4835	Clostridioides	3
RGVC4853	Neisseria	1
RGVC4858	Klebsiella	3
RGVC4861	Clostridioides	3
RGVC4867	Intestinimonas	1
RGVC4873	Klebsiella	2
RGVC4876	Klebsiella	3
RGVC4878	Mycoplasma	3
RGVC4879	Klebsiella	3
RGVC4893	Neisseria	1
RGVC4901	Neisseria	1
RGVC4910	Neisseria	1
RGVC4915	Pseudomonas	3
RGVC4920	Bacteroides	1
RGVC4921	Clostridioides	3
RGVC4927	Klebsiella	3
RGVC4934	Clostridioides	3
RGVC4940	Klebsiella	3
RGVC4943	Klebsiella	2
RGVC4947	Ruminococcus	3
RGVC4956	Campylobacter	1
RGVC4958	Neisseria	1
RGVC4969	Bacteroides	2
RGVC4984	Mycoplasma	3
RGVC4985	Clostridioides	3
RGVC5004	Bacteroides	3
RGVC5005	Prevotella	1
RGVC5011	Clostridioides	3
RGVC5015	Clostridioides	3
RGVC5021	Bacteroides	1
RGVC5022	Neisseria	1
RGVC5024	Mycoplasma	3
RGVC5025	Klebsiella	3
RGVC5030	Neisseria	1
RGVC5033	Escherichia	1
RGVC5048	Ruminococcus	3
RGVC5055	Clostridioides	3
RGVC5057	Mycoplasma	3
RGVC5063	Mycoplasma	3
RGVC5073	Klebsiella	1
RGVC5089	Mycoplasma	3
RGVC5098	Mycoplasma	3
RGVC5106	Clostridioides	3
RGVC5107	Neisseria	1
RGVC5114	Escherichia	2
RGVC5133	Neisseria	1
RGVC5144	Klebsiella	3
RGVC5147	Neisseria	1
RGVC5148	Neisseria	1
RGVC5149	Klebsiella	2
RGVC5151	Acinetobacter	1
RGVC5154	Clostridioides	3
RGVC5160	Clostridioides	3
RGVC5162	Klebsiella	3
RGVC5163	Klebsiella	2
RGVC5170	Mycoplasma	3
RGVC5177	Flavonifractor	1
RGVC5178	Klebsiella	2
RGVC5192	Neisseria	1
RGVC5195	Klebsiella	3
RGVC5209	Neisseria	2
RGVC5214	Neisseria	1
RGVC5217	Coprobacillus	1
RGVC5219	Klebsiella	2
RGVC5220	Oscillibacter	1
RGVC5236	Ruminococcus	3
RGVC5238	Ruminococcus	3
RGVC5247	Salmonella	1
RGVC5254	Mycoplasma	3
RGVC5255	Lactobacillus	3
RGVC5256	Mycoplasma	3
RGVC5274	Mycoplasma	1
RGVC5284	Ruminococcus	1
RGVC5294	Fibrobacter	1
RGVC5344	Ruminococcus	1
RGVC5379	Prevotella	1
RGVC5389	Fibrobacter	1
RGVC5446	Neisseria	1
RGVC5497	Prevotella	1
RGVC5527	Prevotella	1
RGVC5528	Ruminococcus	1
RGVC5539	Ruminococcus	1
RGVC5549	Klebsiella	3
RGVC5595	Ruminococcus	1
RGVC5601	Neisseria	1
RGVC5681	Fibrobacter	1
RGVC5731	Ruminobacter	1
RGVC5787	Fibrobacter	1
RGVC5800	Succinivibrio	1
RGVC5973	Bacteroides	1
RGVC6046	Prevotella	1
RGVC6047	Prevotella	1
RGVC6074	Succinimonas	1
RGVC6163	Ruminobacter	1
RGVC6191	Ruminococcus	1
RGVC6223	Prevotella	1
RGVC6270	Succinivibrio	1
RGVC6306	Klebsiella	1
RGVC6327	Neisseria	1
RGVC6337	Neisseria	1
RGVC6352	Fibrobacter	1
RGVC6399	Prevotella	1
RGVC6466	Succiniclasticum	1
RGVC6489	Prevotella	1
RGVC6538	Bacteroides	1
RGVC6578	Prevotella	1
RGVC6604	Ruminobacter	1
RGVC6622	Fibrobacter	1
RGVC6649	Succinimonas	1
RGVC6653	Fibrobacter	1
RGVC6707	Neisseria	1
RGVC6710	Fibrobacter	1
RGVC6719	Prevotella	1
RGVC6734	Butyrivibrio	1
RGVC6744	Prevotella	1
RGVC6757	Prevotella	1
RGVC6773	Ruminococcus	1
RGVC6778	Gallibacterium	1
RGVC6830	Prevotella	1
RGVC7088	Prevotella	1
RGVC7089	Prevotella	1
RGVC7164	Succinimonas	1
RGVC7233	Bacteroides	1
RGVC7237	Ruminococcus	1
RGVC7255	Klebsiella	3
RGVC7268	Butyrivibrio	1
RGVC7317	Ruminococcus	1
RGVC7332	Neisseria	1
RGVC7347	Prevotella	1
RGVC7362	Prevotella	1
RGVC7491	Bifidobacterium	1
RGVC7495	Prevotella	1
RGVC7526	Odoribacter	1
RGVC7608	Bacteroides	1
RGVC7639	Bifidobacterium	1
RGVC7665	Clostridium	1
RGVC7686	Bifidobacterium	1
RGVC7712	Salinispora	1
RGVC7742	Odoribacter	1
RGVC7752	Pseudobutyrivibrio	1
RGVC7973	Sphingobium	1
RGVC8006	Ruminococcus	1
RGVC8274	Prevotella	1
RGVC8314	Eubacterium	2
RGVC8324	Eubacterium	1
RGVC8558	Ruminococcus	1
RGVC8564	Ruminobacter	1
RGVC8898	Desulfotomaculum	1
RGVC8984	Treponema	1
RGVC9001	Ruminococcus	1
RGVC9063	Ruminococcus	1
RGVC9318	Fibrobacter	1
RGVC9547	Ruminococcus	1
RGVC9555	Ruminococcus	1
RGVC9786	Butyrivibrio	1
RGVC10304	Butyrivibrio	1
RGVC10437	Treponema	1
RGVC10484	Succinivibrio	3
RGVC10700	Acidovorax	1
RGVC10828	Treponema	1
RGVC10927	Bifidobacterium	1
RGVC10935	Bifidobacterium	1
RGVC10936	Bifidobacterium	1
RGVC10955	Succinivibrio	1
RGVC11027	Ruminococcus	1
RGVC11129	Alloprevotella	1
RGVC11165	Ruthenibacterium	1
RGVC11176	Odoribacter	1
RGVC11177	Ruminococcus	1
RGVC11185	Ruminococcus	1
RGVC11282	Succinimonas	1
RGVC11325	Ruminococcus	1
RGVC11327	Prevotella	1
RGVC11328	Fibrobacter	1
RGVC11336	Ruminococcus	1
RGVC11337	Ruminococcus	1
RGVC11341	Ruminococcus	1
RGVC11342	Ruminococcus	1
RGVC11345	Fibrobacter	1
RGVC11354	Prevotella	1
RGVC11355	Bacteroides	3
RGVC11435	Neisseria	1
RGVC11438	Prevotella	1
RGVC11475	Bacteroides	3
RGVC11501	Bacteroides	1
RGVC11507	Prevotella	1
RGVC11509	Prevotella	1
RGVC11510	Prevotella	1
RGVC11511	Prevotella	1
RGVC11540	Prevotella	1
RGVC11541	Butyrivibrio	1
RGVC11545	Prevotella	1
RGVC11558	Prevotella	1
RGVC11563	Fibrobacter	1
RGVC11564	Fibrobacter	1
RGVC11565	Neisseria	1
RGVC11592	Neisseria	1
RGVC11599	Ruminococcus	1
RGVC11613	Ruminococcus	1
RGVC11614	Ruminococcus	1
RGVC11616	Neisseria	1
RGVC11631	Prevotella	1
RGVC11632	Prevotella	1
RGVC11633	Prevotella	1
RGVC11651	Ruminococcus	1
RGVC11714	Prevotella	1
RGVC11747	Pseudobutyrivibrio	1
RGVC11760	Prevotella	1
RGVC11761	Succinimonas	1
RGVC11762	Succinimonas	1
RGVC11773	Ruminococcus	1
RGVC11774	Ruminococcus	1
RGVC11812	Prevotella	1
RGVC11828	Prevotella	1
RGVC11844	Prevotella	1
RGVC11854	Ruminococcus	1
RGVC11868	Prevotella	1
RGVC11882	Prevotella	1
RGVC11896	Prevotella	1
RGVC11900	Ruminococcus	1
RGVC11901	Ruminococcus	1
RGVC11915	Prevotella	1
RGVC11939	Prevotella	1
RGVC11940	Photobacterium	1
RGVC11962	Prevotella	1
RGVC11985	Prevotella	1
RGVC11986	Prevotella	1
RGVC11998	Ruminococcus	1
RGVC12000	Prevotella	1
RGVC12001	Prevotella	1
RGVC12052	Ruminococcus	1
RGVC12098	Prevotella	1
RGVC12130	Prevotella	1
RGVC12138	Neisseria	1
RGVC12160	Bacteroides	1
RGVC12173	Prevotella	1
RGVC12266	Ruminococcus	1
RGVC12267	Ruminococcus	1
RGVC12268	Ruminococcus	1
RGVC12269	Ruminococcus	1
RGVC12313	Prevotella	1
RGVC12314	Prevotella	1
RGVC12343	Ruminococcus	1
RGVC12344	Ruminococcus	1
RGVC12360	Neisseria	1
RGVC12363	Succinimonas	1
RGVC12381	Prevotella	1
RGVC12398	Neisseria	1
RGVC12408	Fibrobacter	1
RGVC12439	Prevotella	1
RGVC12444	Ruminococcus	1
RGVC12446	Fibrobacter	1
RGVC12447	Ruminococcus	1
RGVC12454	Prevotella	1
RGVC12460	Neisseria	1
RGVC12465	Prevotella	1
RGVC12544	Prevotella	1
RGVC12545	Fibrobacter	1
RGVC12555	Prevotella	1
RGVC12586	Prevotella	1
RGVC12595	Ruminococcus	1
RGVC12602	Prevotella	1
RGVC12615	Ruminobacter	1
RGVC12616	Ruminobacter	1
RGVC12617	Ruminobacter	1
RGVC12670	Neisseria	1
RGVC12686	Prevotella	1
RGVC12703	Ruminococcus	1
RGVC12714	Prevotella	1
RGVC12716	Prevotella	1
RGVC12725	Prevotella	1
RGVC12736	Succinimonas	1
RGVC12737	Succinimonas	1
RGVC12749	Neisseria	1
RGVC12795	Parabacteroides	1
RGVC12798	Succinimonas	1
RGVC12847	Succinimonas	1
RGVC12858	Pseudobutyrivibrio	1
RGVC12934	Prevotella	1
RGVC12945	Ruminococcus	1
RGVC12962	Prevotella	1
RGVC12997	Prevotella	1
RGVC13001	Prevotella	1
RGVC13058	Ruminococcus	1
RGVC13068	Prevotella	1
RGVC13077	Ruminobacter	1
RGVC13086	Ruminococcus	1
RGVC13119	Prevotella	1
RGVC13128	Streptococcus	1
RGVC13150	Prevotella	1
RGVC13167	Ruminococcus	1
RGVC13168	Prevotella	1
RGVC13182	Fibrobacter	1
RGVC13236	Neisseria	1
RGVC13251	Ruminococcus	1
RGVC13325	Fibrobacter	1
RGVC13348	Ruminococcus	1
RGVC13426	Ruminococcus	1
RGVC13612	Prevotella	1
RGVC13647	Succinivibrio	1
RGVC13651	Succinimonas	1
RGVC13655	Prevotella	1
RGVC13676	Prevotella	1
RGVC13708	Prevotella	1
RGVC13710	Prevotella	1
RGVC13727	Prevotella	1
RGVC13742	Prevotella	1
RGVC13757	Prevotella	1
RGVC13789	Pseudomonas	3
RGVC13828	Succinimonas	1
RGVC13868	Prevotella	1
RGVC13880	Prevotella	1
RGVC13888	Prevotella	1
RGVC13912	Ruminococcus	1
RGVC13920	Prevotella	1
RGVC13922	Prevotella	1
RGVC13923	Ruminococcus	1
RGVC13944	Ruminococcus	1
RGVC13956	Ruminococcus	1
RGVC14100	Prevotella	1
RGVC14116	Prevotella	1
RGVC14174	Prevotella	1
RGVC14229	Prevotella	1
RGVC14234	Ruminococcus	1
RGVC14250	Prevotella	1
RGVC14280	Prevotella	1
RGVC14286	Oribacterium	1
RGVC14302	Prevotella	1
RGVC14328	Prevotella	1
RGVC14329	Prevotella	1
RGVC14356	Treponema	1
RGVC14432	Prevotella	1
RGVC14445	Ruminococcus	1
RGVC14478	Ruminococcus	1
RGVC14484	Prevotella	1
RGVC14529	Succinatimonas	1
RGVC14536	Ruminococcus	1
RGVC14538	Ruminobacter	1
RGVC14550	Prevotella	1
RGVC14585	Fibrobacter	1
RGVC14586	Prevotella	1
RGVC14591	Ruminococcus	1
RGVC14666	Prevotella	1
RGVC14680	Neisseria	1
RGVC14720	Butyrivibrio	1
RGVC14731	Ruminococcus	1
RGVC14746	Prevotella	1
RGVC14762	Prevotella	1
RGVC14770	Ruminococcus	1
RGVC14775	Ruminococcus	1
RGVC14787	Kandleria	1
RGVC14829	Prevotella	1
RGVC14859	Ruminococcus	1
RGVC14932	Prevotella	1
RGVC14939	Ruminococcus	1
RGVC15008	Prevotella	1
RGVC15029	Ruminococcus	1
RGVC15030	Ruminococcus	1
RGVC15033	Ruminococcus	1
RGVC15059	Klebsiella	3
RGVC15109	Prevotella	1
RGVC15142	Parabacteroides	1
RGVC15143	Neisseria	1
RGVC15181	Ruminococcus	1
RGVC15189	Bacteroides	1
RGVC15207	Fibrobacter	1
RGVC15271	Prevotella	1
RGVC15273	Prevotella	1
RGVC15298	Prevotella	1
RGVC15320	Ruminococcus	1
RGVC15374	Fibrobacter	1
RGVC15396	Fibrobacter	1
RGVC15401	Prevotella	1
RGVC15415	Prevotella	1
RGVC15444	Ruminococcus	1
RGVC15490	Ruminococcus	1
RGVC15498	Clostridium	1
RGVC15575	Ruminobacter	1
RGVC15632	Fibrobacter	1
RGVC15637	Ruminococcus	1
RGVC15638	Succinimonas	1
RGVC15659	Ruminococcus	1
RGVC15673	Ruminococcus	1
RGVC15675	Ruminobacter	1
RGVC15680	Ruminococcus	1
RGVC15695	Acidaminococcus	1
RGVC15815	Prevotella	1
RGVC15836	Prevotella	1
RGVC15847	Succinimonas	1
RGVC15866	Prevotella	1
RGVC15920	Prevotella	1
RGVC15965	Ruminococcus	1
RGVC16042	Prevotella	1
RGVC16074	Prevotella	1
RGVC16081	Ruminococcus	1
RGVC16149	Ruminococcus	1
RGVC16316	Ruminococcus	1
RGVC16323	Succinimonas	1
RGVC16351	Ruminococcus	1
RGVC16363	Prevotella	1
RGVC16471	Prevotella	1
RGVC16524	Candidatus Sulcia	1
RGVC16541	Prevotella	1
RGVC16552	Ruminococcus	1
RGVC16570	Treponema	1
RGVC16581	Ruminococcus	1
RGVC16689	Ruminococcus	1
RGVC16705	Pseudomonas	3
RGVC16713	Mycoplasma	3
RGVC16718	Mycoplasma	3
RGVC16739	Prevotella	1
RGVC16741	Neisseria	1
RGVC16756	Neisseria	1
RGVC16765	Parabacteroides	3
RGVC16780	Clostridium	1
RGVC16786	Bacteroides	1
RGVC16792	Mycoplasma	3
RGVC16806	Neisseria	1
RGVC16811	Mycoplasma	3
RGVC16835	Neisseria	1
RGVC16845	Neisseria	1
RGVC16849	Neisseria	1
RGVC16850	Neisseria	1
RGVC16864	Clostridioides	3
RGVC16868	Neisseria	1
RGVC16877	Mycoplasma	3
RGVC16889	Bacteroides	3
RGVC16899	Neisseria	1
RGVC16907	Neisseria	1
RGVC16942	Neisseria	1
RGVC16971	Clostridium	1
RGVC16976	Lactobacillus	3
RGVC16978	Bacteroides	1
RGVC17013	Neisseria	1
RGVC17015	Neisseria	1
RGVC17021	Neisseria	1
RGVC17025	Bacteroides	3
RGVC17040	Neisseria	1
RGVC17051	Prevotella	1
RGVC17060	Neisseria	1
RGVC17086	Ruminococcus	1
RGVC17105	Eubacterium	1
RGVC17175	Lactobacillus	3
RGVC17179	Coprobacillus	2
RGVC17212	Mycoplasma	3
RGVC17222	Neisseria	1
RGVC17235	Neisseria	1
RGVC17244	Mycoplasma	3
RGVC17263	Neisseria	1
RGVC17265	Neisseria	1
RGVC17278	Neisseria	1
RGVC17283	Neisseria	1
RGVC17284	Bacteroides	3
RGVC17300	Clostridioides	1
RGVC17362	Neisseria	1
RGVC17368	Neisseria	1
RGVC17375	Mycoplasma	3
RGVC17376	Mycoplasma	3
RGVC17377	Neisseria	1
RGVC17397	Neisseria	1
RGVC17398	Neisseria	1
RGVC17404	Pseudomonas	3
RGVC17429	Pseudomonas	3
RGVC17446	Lactimicrobium	1
RGVC17452	Prevotella	1
RGVC17493	Ruminobacter	1
RGVC17519	Ruminococcus	1
RGVC17537	Ruminococcus	1
RGVC17542	Alloprevotella	3
RGVC17594	Acinetobacter	1
RGVC17602	Succiniclasticum	1
RGVC17614	Alloprevotella	1
RGVC17627	Acinetobacter	1
RGVC17780	Harryflintia	3
RGVC17784	Ruminococcus	1
RGVC17905	Eubacterium	1
RGVC17937	Desulfuromonas	1
RGVC17963	Bacteroides	1
RGVC18015	Acinetobacter	1
RGVC18063	Bacteroides	1
RGVC18266	Pseudomonas	1
RGVC18402	Bacillus	1
RGVC18414	Bacillus	1
RGVC18452	Bacillus	1
RGVC18468	Bacillus	1
RGVC18478	Selenomonas	1
RGVC18637	Clostridium	1
RGVC18703	Treponema	1
RGVC18761	Turicibacter	1
RGVC18962	Ruminococcus	1
RGVC18996	Fibrobacter	1
RGVC19466	Ruminococcus	1
RGVC19539	Ruminococcus	3
RGVC19558	Campylobacter	1
RGVC19655	Bacteroides	1
RGVC19737	Clostridioides	1
RGVC19805	Prevotella	1
RGVC19825	Acinetobacter	1
RGVC19881	Prevotella	1
RGVC19890	Treponema	1
RGVC20017	Prevotella	1
RGVC20070	Prevotella	1
RGVC20090	Acidaminococcus	1
RGVC20162	Listeria	1
RGVC20474	Prevotella	1
RGVC20496	Prevotella	1
RGVC20574	Pseudomonas	2
RGVC20575	Pseudomonas	2
RGVC20628	Fibrobacter	1
RGVC20699	Neisseria	1
RGVC20720	Prevotella	1
RGVC20756	Prevotella	1
RGVC20791	Prevotella	1
RGVC20853	Bacteroidales	4
RGVC20984	Clostridium	1
RGVC21194	Prevotella	1
RGVC21291	Ruminococcus	1
RGVC21323	Ruminococcus	1
RGVC21330	Campylobacter	1
RGVC21414	Butyricimonas	1
RGVC21585	Salinispora	1
RGVC21629	Ruthenibacterium	1
RGVC21638	Ruminococcus	1
RGVC21781	Bacteroides	1
RGVC21919	Salinispora	1
RGVC22015	Bacteroides	1
RGVC22030	Salinispora	1
RGVC22049	Clostridium	1
RGVC22195	Prevotella	1
RGVC22235	Clostridioides	1
RGVC22303	Catabacter	1
RGVC22365	Ruminococcus	1
RGVC22483	Ruminococcus	1
RGVC22642	Atopobium	1
RGVC22804	Butyrivibrio	1
RGVC22861	Coprobacillus	1
RGVC22862	Prevotella	1
RGVC22884	Prevotella	1
RGVC22912	Bacteroides	1
RGVC22968	Bacteroides	1
RGVC23013	Prevotella	1
RGVC23133	Bacteroides	1
RGVC23227	Clostridium	1
RGVC23241	Subdoligranulum	1
RGVC23393	Campylobacter	1
RGVC23404	Bacteroides	1
RGVC23421	Prevotella	2
RGVC23440	Prevotella	1
RGVC23488	Salinispora	1
RGVC23565	Anaerostipes	1
RGVC23590	Acinetobacter	1
RGVC23599	Harryflintia	1
RGVC23660	Oribacterium	1
RGVC23668	Prevotella	1
RGVC23674	Barnesiella	1
RGVC23813	Succiniclasticum	1
RGVC23922	Lachnoclostridium	1
RGVC23925	Prevotella	1
RGVC24064	Prevotella	1
RGVC24082	Alistipes	1
RGVC24098	Clostridium	1
RGVC24156	Succinivibrio	1
RGVC24287	Ruminococcus	1
RGVC24385	Ruminococcus	1
RGVC24416	Ruminococcus	1
RGVC24474	Mycoplasma	3
RGVC24493	Prevotella	1
RGVC24531	Anaerovibrio	1
RGVC24545	Neisseria	1
RGVC24567	Neisseria	1
RGVC24577	Neisseria	1
RGVC24590	Neisseria	1
RGVC24610	Prevotella	1
RGVC24615	Prevotella	1
RGVC24679	Pseudomonas	3
RGVC24685	Prevotella	1
RGVC24690	Mycoplasma	3
RGVC24726	Klebsiella	3
RGVC24743	Prevotella	1
RGVC24760	Acinetobacter	3
RGVC24776	Prevotella	1
RGVC24781	Prevotella	1
RGVC24793	Selenomonas	1
RGVC24837	Neisseria	1
RGVC24864	Klebsiella	2
RGVC24920	Neisseria	1
RGVC24922	Mycoplasma	1
RGVC24935	Prevotella	1
RGVC24962	Fibrobacter	1
RGVC24971	Neisseria	1
RGVC24980	Prevotella	1
RGVC25081	Klebsiella	2
RGVC25108	Prevotella	1
RGVC25230	Prevotella	1
RGVC25243	Prevotella	1
RGVC25244	Ruminococcus	1
RGVC25260	Prevotella	1
RGVC25261	Prevotella	1
RGVC25281	Prevotella	1
RGVC25309	Prevotella	1
RGVC25315	Succinivibrio	1
RGVC25333	Acetobacter	1
RGVC25342	Candidatus Kuenenia	1
RGVC25344	Prevotella	1
RGVC25363	Bacteroides	3
RGVC25378	Klebsiella	3
RGVC25380	Erwinia	1
RGVC25413	Butyrivibrio	1
RGVC25416	Prevotella	1
RGVC25441	Candidatus Kuenenia	1
RGVC25536	Prevotella	1
RGVC25554	Ruminococcus	1
RGVC25568	Prevotella	1
RGVC25569	Prevotella	1
RGVC25597	Anaerovibrio	1
RGVC25622	Mycoplasma	3
RGVC25628	Prevotella	1
RGVC25629	Prevotella	1
RGVC25653	Mycoplasma	3
RGVC25674	Ruminococcus	1
RGVC25688	Prevotella	1
RGVC25737	Ruminococcus	1
RGVC25814	Neisseria	1
RGVC25838	Fibrobacter	1
RGVC25853	Pseudomonas	3
RGVC25862	Prevotella	1
RGVC25913	Ruminobacter	1
RGVC25917	Olsenella	1
RGVC26003	Neisseria	1
RGVC26007	Prevotella	1
RGVC26040	Fibrobacter	1
RGVC26050	Ruminococcus	1
RGVC26076	Fibrobacter	1
RGVC26089	Bacteroides	1
RGVC26106	Neisseria	1
RGVC26123	Clostridioides	3
RGVC26147	Neisseria	1
RGVC26189	Neisseria	1
RGVC26198	Succiniclasticum	1
RGVC26225	Neisseria	1
RGVC26231	Bacteroides	1
RGVC26242	Clostridioides	3
RGVC26269	Mycoplasma	1
RGVC26304	Klebsiella	1
RGVC26331	Desulfatitalea	1
RGVC26341	Mycoplasma	3
RGVC26385	Coprobacillus	3
RGVC26405	Clostridioides	3
RGVC26406	Neisseria	1
RGVC26447	Prevotella	1
RGVC26494	Bacteroides	3
RGVC26546	Neisseria	1
RGVC26606	Prevotella	1
RGVC26699	Prevotella	1
RGVC26701	Prevotella	1
RGVC26733	Neisseria	1
RGVC26751	Neisseria	1
RGVC26790	Prevotella	1
RGVC26797	Neisseria	1
RGVC26800	Neisseria	1
RGVC26814	Ruminococcus	1
RGVC26944	Prevotella	1
RGVC26960	Neisseria	1
RGVC27059	Eubacterium	1
RGVC27072	Acetobacter	1
RGVC27085	Prevotella	1
RGVC27124	Prevotella	1
RGVC27244	Prevotella	1
RGVC27248	Prevotella	1
RGVC27290	Ruminococcus	1
RGVC27323	Bacteroides	3
RGVC27334	Prevotella	1
RGVC27376	Bacteroides	1
RGVC27393	Bacteroides	3
RGVC27426	Prevotella	1
RGVC27448	Prevotella	1
RGVC27449	Eubacterium	1
RGVC27457	Neisseria	1
RGVC27471	Fibrobacter	1
RGVC27477	Prevotella	1
RGVC27490	Neisseria	1
RGVC27501	Odoribacter	1
RGVC27532	Prevotella	1
RGVC27537	Prevotella	1
RGVC27674	Pseudomonas	1
RGVC27705	Acidaminococcus	1
RGVC27716	Treponema	1
RGVC27951	Lactobacillus	1
RGVC27983	Selenomonas	1
RGVC28014	Prevotella	1
RGVC28033	Pseudomonas	3
RGVC28065	Ruminococcus	1
RGVC28082	Fibrobacter	1
RGVC28097	Neisseria	1
RGVC28121	Prevotella	1
RGVC28133	Ruminococcus	3
RGVC28206	Prevotella	1
RGVC28208	Prevotella	1
RGVC28214	Prevotella	1
RGVC28247	Prevotella	1
RGVC28279	Prevotella	1
RGVC28285	Clostridioides	3
RGVC28290	Acetobacter	1
RGVC28335	Neisseria	1
RGVC28408	Acetobacter	1
RGVC28478	Prevotella	1
RGVC28504	Prevotella	1
RGVC28539	Ruminococcus	1
RGVC28551	Pseudobutyrivibrio	1
RGVC28563	Prevotella	1
RGVC28589	Neisseria	1
RGVC28629	Parabacteroides	1
RGVC28639	Selenomonas	1
RGVC28748	Lactobacillus	2
RGVC28759	Acetobacter	1
RGVC28772	Prevotella	1
RGVC28791	Neisseria	1
RGVC28834	Prevotella	1
RGVC28858	Prevotella	1
RGVC28862	Prevotella	1
RGVC28906	Prevotella	1
RGVC28917	Mycoplasma	3
RGVC28951	Ruminococcus	1
RGVC28993	Prevotella	1
RGVC29033	Selenomonas	1
RGVC29059	Ruminococcus	1
RGVC29063	Ruminococcus	1
RGVC29103	Succiniclasticum	1
RGVC29107	Prevotella	1
RGVC29119	Prevotella	1
RGVC29139	Prevotella	1
RGVC29168	Prevotella	1
RGVC29199	Klebsiella	3
RGVC29202	Mycoplasma	3
RGVC29221	Bacteroides	1
RGVC29312	Neisseria	1
RGVC29355	Succinatimonas	1
RGVC29379	Mycoplasma	3
RGVC29409	Ruminococcus	1
RGVC29443	Prevotella	1
RGVC29453	Neisseria	1
RGVC29493	Neisseria	1
RGVC29546	Bacteroides	1
RGVC29550	Mycoplasma	3
RGVC29560	Prevotella	1
RGVC29579	Prevotella	1
RGVC29582	Neisseria	1
RGVC29585	Prevotella	1
RGVC29604	Ruminococcus	1
RGVC29668	Prevotella	1
RGVC29677	Prevotella	1
RGVC29739	Mycoplasma	3
RGVC29748	Ruminococcus	1
RGVC29763	Bacteroides	3
RGVC29770	Prevotella	1
RGVC29799	Prevotella	1
RGVC29841	Prevotella	1
RGVC29875	Prevotella	1
RGVC29886	Pseudomonas	3
RGVC29967	Ruminococcus	1
RGVC30004	Prevotella	1
RGVC30015	Klebsiella	1
RGVC30045	Prevotella	1
RGVC30126	Bacteroides	1
RGVC30152	Listeria	1
RGVC30187	Prevotella	1
RGVC30196	Lactimicrobium	1
RGVC30214	Bacillus	1
RGVC30215	Bacillus	1
RGVC30224	Prevotella	1
RGVC30244	Butyrivibrio	1
RGVC30262	Treponema	1
RGVC30276	Bacillus	1
RGVC30287	Bacillus	1
RGVC30308	Enterococcus	1
RGVC30309	Enterococcus	1
RGVC30311	Lactococcus	1
RGVC30356	Prevotella	1
RGVC30515	Harryflintia	3
RGVC30519	Clostridium	1
RGVC30542	Bacteroides	1
RGVC30559	Treponema	1
RGVC30615	Treponema	1
RGVC30651	Fibrobacter	1
RGVC30798	Fibrobacter	1
RGVC30844	Acinetobacter	1
RGVC30870	Coprobacillus	1
RGVC30903	Treponema	1
RGVC30924	Fibrobacter	1
RGVC30999	Halomonas	1
RGVC31008	Leuconostoc	1
RGVC31014	Pseudomonas	3
RGVC31137	Olsenella	1
RGVC31192	Succiniclasticum	1
RGVC31447	Sphingomonas	1
RGVC31638	Fibrobacter	1
RGVC31659	Fibrobacter	1
RGVC31764	Fibrobacter	1
RGVC31959	Ruminococcus	1
RGVC32285	Prevotella	1
RGVC32427	Olsenella	1
RGVC32430	Ruminococcus	1
RGVC32447	Fibrobacter	1
RGVC32530	Bacillus	1
RGVC32598	Bacillus	1
RGVC32604	Streptococcus	1
RGVC32756	Bacteroides	1
RGVC32802	Prevotella	1
RGVC32951	Prevotella	1
RGVC33006	Ruminococcus	1
RGVC33019	Acinetobacter	1
RGVC33041	Lawsonibacter	1
RGVC33053	Bacteroides	1
RGVC33124	Prevotella	1
RGVC33133	Campylobacter	1
RGVC33553	Ruminococcus	1
RGVC33555	Ruminococcus	1
RGVC33725	Prevotella	1
RGVC33776	Ruminococcus	1
RGVC33894	Prevotella	1
RGVC33941	Prevotella	1
RGVC33953	Acinetobacter	1
RGVC33966	Alloprevotella	1
RGVC33983	Ruminococcus	1
RGVC34042	Treponema	1
RGVC34089	Treponema	1
RGVC34133	Ruminococcus	1
RGVC34198	Succiniclasticum	1
RGVC34270	Fibrobacter	1
RGVC34276	Prevotella	1
RGVC34299	Megasphaera	1
RGVC34515	Fibrobacter	1
RGVC34521	Ruminococcus	1
RGVC34796	Criibacterium	1
RGVC34891	Ruminobacter	1
RGVC34970	Kandleria	1
RGVC35550	Prevotella	1
RGVC35554	Fibrobacter	1
RGVC35668	Bacteroides	1
RGVC36002	Catenibacterium	1
RGVC36044	Fibrobacter	1
RGVC36114	Fibrobacter	1
RGVC36269	Intestinimonas	1
RGVC36339	Fibrobacter	1
RGVC36578	Fibrobacter	1
RGVC36628	Prevotella	1
RGVC36664	Prevotella	1
RGVC36915	Prevotella	1
RGVC37041	Coprococcus	1
RGVC37044	Ruminococcus	1
RGVC37078	Barnesiella	1
RGVC37266	Bacteroides	1
RGVC37356	Capnocytophaga	1
RGVC37405	Parabacteroides	1
RGVC37497	Coprobacillus	1
RGVC37503	Treponema	1
RGVC37524	Roseburia	3
RGVC37528	Campylobacter	1
RGVC37566	Bacteroides	1
RGVC37569	Muribaculum	1
RGVC37646	Clostridium	1
RGVC37692	Clostridium	1
RGVC37705	Acinetobacter	1
RGVC37729	Bifidobacterium	1
RGVC37733	Pseudomonas	1
RGVC37743	Bifidobacterium	1
RGVC37781	Clostridium	1
RGVC37782	Salmonella	2
RGVC37811	Turicibacter	1
RGVC37822	Bifidobacterium	1
RGVC37835	Prevotella	1
RGVC37863	Catabacter	1
RGVC37868	Prevotella	1
RGVC37913	Prevotella	1
RGVC37917	Prevotella	1
RGVC37930	Desulfovibrio	1
RGVC38000	Ruminococcus	1
RGVC38014	Prevotella	3
RGVC38119	Clostridium	1
RGVC38284	Bacteroides	1
RGVC38323	Bacteroides	1
RGVC38345	Eubacterium	1
RGVC38402	Lachnoclostridium	1
RGVC38442	Acinetobacter	1
RGVC38546	Prevotella	1
RGVC38548	Lachnoclostridium	1
RGVC38603	Prevotella	1
RGVC38651	Anaerovibrio	1
RGVC38668	Selenomonas	1
RGVC38676	Prevotella	1
RGVC38687	Ruminococcus	1
RGVC38706	Kandleria	1
RGVC38787	Olsenella	1
RGVC38875	Treponema	1
RGVC39007	Ruminococcus	1
RGVC39362	Bacteroides	1
RGVC39419	Ruminococcus	1
RGVC39454	Fibrobacter	1
RGVC39581	Odoribacter	1
RGVC40248	Acinetobacter	1
RGVC40766	Prevotella	1
RGVC40824	Fibrobacter	1
RGVC40938	Butyrivibrio	1
RGVC41196	Ruminococcus	1
RGVC41212	Ruminococcus	1
RGVC41364	Prevotella	1
RGVC41409	Ruminococcus	1
RGVC41652	Ruminococcus	1
RGVC41936	Odoribacter	1
RGVC41971	Treponema	1
RGVC41973	Treponema	1
RGVC42004	Fibrobacter	1
RGVC42020	Fibrobacter	1
RGVC42207	Prevotella	1
RGVC42484	Clostridium	1
RGVC42608	Butyrivibrio	1
RGVC42636	Sphingomonas	1
RGVC42755	Acinetobacter	1
RGVC42934	Ruminococcus	1
RGVC42987	Fibrobacter	1
RGVC43086	Treponema	1
RGVC43103	Ruminococcus	1
RGVC43318	Ruminococcus	1
RGVC43339	Treponema	1
RGVC43431	Salinispora	1
RGVC43519	Fibrobacter	1
RGVC43782	Butyrivibrio	1
RGVC43902	Prevotella	1
RGVC43906	Fibrobacter	1
RGVC43924	Treponema	1
RGVC43949	Lactobacillus	1
RGVC43978	Ruminococcus	1

## Sheet: Table S28
Table S28. Results of host prediction to genome by iPHoP
vOTUs	Host	Host-taxonomy	Main-method	Confidence-score	Additional-methods
RGVC1	GB_GCA_000432895.1	d__Bacteria;p__Firmicutes;c__Bacilli;o__RFN20;f__CAG-449;g__CAG-449;s__CAG-449 sp000432895	blast	91.3	None
RGVC1	GB_GCA_900551385.1	d__Bacteria;p__Firmicutes;c__Bacilli;o__RFN20;f__CAG-449;g__CAG-449;s__CAG-449 sp900551385	blast	91.1	None
RGVC1	RS_GCF_000222765.1	d__Bacteria;p__Firmicutes;c__Bacilli;o__Lactobacillales;f__Streptococcaceae;g__Streptococcus;s__Streptococcus cristatus	blast	90.3	None
RGVC1	RS_GCF_000186445.1	d__Bacteria;p__Firmicutes;c__Bacilli;o__Lactobacillales;f__Streptococcaceae;g__Streptococcus;s__Streptococcus agalactiae	blast	90	None
RGVC2	RS_GCF_002910915.1	d__Bacteria;p__Actinobacteriota;c__Actinomycetia;o__Streptomycetales;f__Streptomycetaceae;g__Streptomyces;s__Streptomyces sp002910915	blast	96.8	None
RGVC2	RS_GCF_001561955.1	d__Bacteria;p__Firmicutes_A;c__Clostridia;o__Lachnospirales;f__Anaerotignaceae;g__Anaerotignum;s__Anaerotignum propionicum	blast	90.2	None
RGVC2	RS_GCF_003121295.1	d__Bacteria;p__Actinobacteriota;c__Actinomycetia;o__Streptomycetales;f__Streptomycetaceae;g__Streptomyces;s__Streptomyces orinoci	blast	90	None
RGVC5	3300019376_18	d__Bacteria;p__Firmicutes_A;c__Clostridia_A;o__Christensenellales;f__CAG-74;g__Firm-11;s__	blast	91.7	None
RGVC5	3300022660_71	d__Bacteria;p__Firmicutes_A;c__Clostridia_A;o__Christensenellales;f__CAG-74;g__Firm-11;s__	blast	91.7	None
RGVC5	GB_GCA_004556545.1	d__Bacteria;p__Firmicutes_A;c__Clostridia_A;o__Christensenellales;f__CAG-74;g__Firm-11;s__Firm-11 sp004556545	blast	90.3	None
RGVC5	GB_GCA_012729115.1	d__Bacteria;p__Firmicutes_A;c__Clostridia_A;o__Christensenellales;f__CAG-74;g__Firm-11;s__Firm-11 sp012729115	blast	91.7	None
RGVC5	GB_GCA_900540045.1	d__Bacteria;p__Firmicutes_A;c__Clostridia_A;o__Christensenellales;f__CAG-74;g__Firm-11;s__Firm-11 sp900540045	blast	93.8	None
RGVC5	GB_GCA_900548145.1	d__Bacteria;p__Firmicutes_A;c__Clostridia_A;o__Christensenellales;f__CAG-74;g__Firm-11;s__Firm-11 sp900548145	blast	90.3	None
RGVC6	GB_GCA_000433455.1	d__Bacteria;p__Firmicutes;c__Bacilli;o__RF39;f__UBA660;g__CAG-877;s__CAG-877 sp000433455	blast	90.1	None
RGVC6	GB_GCA_900548695.1	d__Bacteria;p__Firmicutes;c__Bacilli;o__RF39;f__UBA660;g__CAG-877;s__CAG-877 sp900548695	blast	92.1	None
RGVC6	GB_GCA_900552495.1	d__Bacteria;p__Firmicutes;c__Bacilli;o__RF39;f__UBA660;g__CAG-877;s__CAG-877 sp900552495	blast	92.1	None
RGVC6	RS_GCF_900768815.1	d__Bacteria;p__Firmicutes;c__Bacilli;o__RF39;f__UBA660;g__CAG-877;s__CAG-877 sp900768815	blast	90	None
RGVC8	RS_GCF_003573975.1	d__Bacteria;p__Firmicutes_A;c__Clostridia;o__Oscillospirales;f__Oscillospiraceae;g__Lawsonibacter;s__Lawsonibacter sp900066825	blast	93.9	None
RGVC15	3300010262_15	d__Bacteria;p__Firmicutes_A;c__Clostridia;o__Oscillospirales;f__Oscillospiraceae;g__Dysosmobacter;s__	blast	93.5	iPHoP-RF;77.30
RGVC16	GB_GCA_000436375.1	d__Bacteria;p__Proteobacteria;c__Alphaproteobacteria;o__RF32;f__CAG-239;g__CAG-495;s__CAG-495 sp000436375	blast	96.9	None
RGVC16	GB_GCA_001917125.1	d__Bacteria;p__Proteobacteria;c__Alphaproteobacteria;o__RF32;f__CAG-239;g__CAG-495;s__CAG-495 sp001917125	blast	92.7	iPHoP-RF;56.50
RGVC17	3300029718_35	d__Bacteria;p__Firmicutes_A;c__Clostridia;o__Oscillospirales;f__Acutalibacteraceae;g__;s__	blast	93	iPHoP-RF;73.00
RGVC17	RS_GCF_000154325.1	d__Bacteria;p__Firmicutes_A;c__Clostridia;o__Oscillospirales;f__Ruminococcaceae;g__Ruminiclostridium_E;s__Ruminiclostridium_E siraeum	blast	92	iPHoP-RF;67.00
RGVC20	RS_GCF_000765235.1	d__Bacteria;p__Firmicutes_A;c__Clostridia;o__Oscillospirales;f__Oscillospiraceae;g__ER4;s__ER4 sp000765235	blast	90.1	iPHoP-RF;67.50
RGVC20	RS_GCF_014297285.1	d__Bacteria;p__Firmicutes_A;c__Clostridia;o__Oscillospirales;f__Oscillospiraceae;g__Dysosmobacter;s__Dysosmobacter sp001916835	blast	93.9	iPHoP-RF;62.50
RGVC22	RS_GCF_000492175.1	d__Bacteria;p__Firmicutes_A;c__Clostridia;o__Oscillospirales;f__Oscillospiraceae;g__Lawsonibacter;s__Lawsonibacter sp000492175	blast	91.7	None
RGVC24	GB_GCA_003522105.1	d__Bacteria;p__Firmicutes_A;c__Clostridia;o__Oscillospirales;f__Oscillospiraceae;g__ER4;s__ER4 sp003522105	blast	90.5	None
RGVC24	RS_GCF_014297285.1	d__Bacteria;p__Firmicutes_A;c__Clostridia;o__Oscillospirales;f__Oscillospiraceae;g__Dysosmobacter;s__Dysosmobacter sp001916835	blast	92.9	iPHoP-RF;71.10
RGVC25	GB_GCA_000431075.1	d__Bacteria;p__Firmicutes_A;c__Clostridia;o__Oscillospirales;f__Oscillospiraceae;g__F23-B02;s__F23-B02 sp000431075	blast	90	iPHoP-RF;65.80
RGVC25	GB_GCA_004556755.1	d__Bacteria;p__Firmicutes_A;c__Clostridia;o__Oscillospirales;f__Oscillospiraceae;g__F23-B02;s__F23-B02 sp004556755	blast	90.4	iPHoP-RF;50.70
RGVC27	GB_GCA_004555625.1	d__Bacteria;p__Firmicutes_A;c__Clostridia;o__Oscillospirales;f__Acutalibacteraceae;g__UBA1417;s__UBA1417 bromii_A	blast	93	iPHoP-RF;67.00
RGVC29	GB_GCA_900754605.1	d__Bacteria;p__Firmicutes_A;c__Clostridia;o__Oscillospirales;f__Oscillospiraceae;g__Lawsonibacter;s__Lawsonibacter sp900754605	blast	91.2	iPHoP-RF;81.10
RGVC29	GB_GCA_900764755.1	d__Bacteria;p__Firmicutes_A;c__Clostridia;o__Oscillospirales;f__Oscillospiraceae;g__Lawsonibacter;s__Lawsonibacter sp900764755	blast	91.2	iPHoP-RF;70.00
RGVC29	RS_GCF_003112755.1	d__Bacteria;p__Firmicutes_A;c__Clostridia;o__Oscillospirales;f__Oscillospiraceae;g__Lawsonibacter;s__Lawsonibacter asaccharolyticus	blast	92.7	iPHoP-RF;78.50
RGVC29	RS_GCF_003573975.1	d__Bacteria;p__Firmicutes_A;c__Clostridia;o__Oscillospirales;f__Oscillospiraceae;g__Lawsonibacter;s__Lawsonibacter sp900066825	blast	91.7	iPHoP-RF;65.80
RGVC29	RS_GCF_902363045.1	d__Bacteria;p__Firmicutes_A;c__Clostridia;o__Oscillospirales;f__Oscillospiraceae;g__Lawsonibacter;s__Lawsonibacter sp902363045	blast	91.6	iPHoP-RF;63.50
RGVC31	GB_GCA_002438865.1	d__Bacteria;p__Firmicutes_A;c__Clostridia;o__Monoglobales_A;f__UBA1381;g__UBA4716;s__UBA4716 sp002438865	blast	91.3	iPHoP-RF;68.60
RGVC32	RS_GCF_000180035.1	d__Bacteria;p__Firmicutes;c__Bacilli;o__Lactobacillales;f__Streptococcaceae;g__Streptococcus;s__Streptococcus parasanguinis_C	blast	96.9	None
RGVC32	RS_GCF_001403635.1	d__Bacteria;p__Firmicutes_A;c__Clostridia;o__Clostridiales;f__Clostridiaceae;g__Clostridium_P;s__Clostridium_P massiliamazoniense	blast	91.9	None
RGVC32	RS_GCF_000222765.1	d__Bacteria;p__Firmicutes;c__Bacilli;o__Lactobacillales;f__Streptococcaceae;g__Streptococcus;s__Streptococcus cristatus	blast	91	None
RGVC32	RS_GCF_000220085.1	d__Bacteria;p__Firmicutes;c__Bacilli;o__Lactobacillales;f__Streptococcaceae;g__Streptococcus;s__Streptococcus mitis_K	blast	90.6	None
RGVC32	RS_GCF_000722685.1	d__Bacteria;p__Firmicutes;c__Bacilli;o__Lactobacillales;f__Streptococcaceae;g__Streptococcus;s__Streptococcus mitis_M	blast	90.5	None
RGVC32	RS_GCF_900456775.1	d__Bacteria;p__Firmicutes_A;c__Clostridia;o__Clostridiales;f__Clostridiaceae;g__Clostridium_P;s__Clostridium_P ventriculi	blast	90.4	None
RGVC32	RS_GCF_000744935.1	d__Bacteria;p__Firmicutes_A;c__Clostridia;o__Clostridiales;f__Clostridiaceae;g__Haloimpatiens;s__Haloimpatiens sp000744935	blast	90.2	None
RGVC33	3300010259_5	d__Bacteria;p__Firmicutes_A;c__Clostridia;o__Oscillospirales;f__Oscillospiraceae;g__CAG-110;s__	blast	90.1	None
RGVC33	3300010278_34	d__Bacteria;p__Firmicutes_A;c__Clostridia;o__Oscillospirales;f__Oscillospiraceae;g__CAG-110;s__	blast	93.6	None
RGVC33	3300010280_27	d__Bacteria;p__Firmicutes_A;c__Clostridia;o__Oscillospirales;f__Oscillospiraceae;g__CAG-110;s__	blast	92.1	None
RGVC33	3300022660_140	d__Bacteria;p__Firmicutes_A;c__Clostridia;o__Oscillospirales;f__Oscillospiraceae;g__CAG-110;s__	blast	92.1	None
RGVC33	GB_GCA_000434635.1	d__Bacteria;p__Firmicutes_A;c__Clostridia;o__Oscillospirales;f__Oscillospiraceae;g__CAG-110;s__CAG-110 sp000434635	blast	92	None
RGVC33	GB_GCA_002362145.1	d__Bacteria;p__Firmicutes_A;c__Clostridia;o__Oscillospirales;f__Oscillospiraceae;g__CAG-110;s__CAG-110 sp002362145	blast	92.1	None
RGVC33	GB_GCA_002362625.1	d__Bacteria;p__Firmicutes_A;c__Clostridia;o__Oscillospirales;f__Oscillospiraceae;g__CAG-110;s__CAG-110 sp002362625	blast	92.1	None
RGVC33	GB_GCA_002436765.1	d__Bacteria;p__Firmicutes_A;c__Clostridia;o__Oscillospirales;f__Oscillospiraceae;g__CAG-110;s__CAG-110 sp002436765	blast	92.1	iPHoP-RF;59.50
RGVC33	GB_GCA_002437585.1	d__Bacteria;p__Firmicutes_A;c__Clostridia;o__Oscillospirales;f__Oscillospiraceae;g__CAG-110;s__CAG-110 sp002437585	blast	92.1	iPHoP-RF;53.80
RGVC33	GB_GCA_002493965.1	d__Bacteria;p__Firmicutes_A;c__Clostridia;o__Oscillospirales;f__Oscillospiraceae;g__CAG-110;s__CAG-110 sp002493965	blast	92.1	None
RGVC33	GB_GCA_004555705.1	d__Bacteria;p__Firmicutes_A;c__Clostridia;o__Oscillospirales;f__Oscillospiraceae;g__CAG-110;s__CAG-110 sp004555705	blast	92.1	iPHoP-RF;55.40
RGVC33	GB_GCA_004562395.1	d__Bacteria;p__Firmicutes_A;c__Clostridia;o__Oscillospirales;f__Oscillospiraceae;g__CAG-110;s__CAG-110 sp004562395	blast	91.8	None
RGVC33	GB_GCA_900540635.1	d__Bacteria;p__Firmicutes_A;c__Clostridia;o__Oscillospirales;f__Oscillospiraceae;g__CAG-110;s__CAG-110 sp900540635	blast	93.8	None
RGVC33	GB_GCA_900544405.1	d__Bacteria;p__Firmicutes_A;c__Clostridia;o__Oscillospirales;f__Oscillospiraceae;g__CAG-110;s__CAG-110 sp900544405	blast	92.1	None
RGVC33	GB_GCA_900544945.1	d__Bacteria;p__Firmicutes_A;c__Clostridia;o__Oscillospirales;f__Oscillospiraceae;g__CAG-110;s__CAG-110 sp900544945	blast	92.1	None
RGVC33	GB_GCA_900546075.1	d__Bacteria;p__Firmicutes_A;c__Clostridia;o__Oscillospirales;f__Oscillospiraceae;g__CAG-110;s__CAG-110 sp900546075	blast	91.7	iPHoP-RF;54.90
RGVC33	GB_GCA_900549495.1	d__Bacteria;p__Firmicutes_A;c__Clostridia;o__Oscillospirales;f__Oscillospiraceae;g__CAG-110;s__CAG-110 sp900549495	blast	93.5	None
RGVC33	GB_GCA_900549705.1	d__Bacteria;p__Firmicutes_A;c__Clostridia;o__Oscillospirales;f__Oscillospiraceae;g__CAG-110;s__CAG-110 sp900549705	blast	93	None
RGVC33	GB_GCA_900553805.1	d__Bacteria;p__Firmicutes_A;c__Clostridia;o__Oscillospirales;f__Oscillospiraceae;g__CAG-110;s__CAG-110 sp900553805	blast	91.9	iPHoP-RF;55.40
RGVC33	GB_GCA_900752285.1	d__Bacteria;p__Firmicutes_A;c__Clostridia;o__Oscillospirales;f__Oscillospiraceae;g__CAG-110;s__CAG-110 sp900752285	blast	92.1	None
RGVC33	GB_GCA_900762245.1	d__Bacteria;p__Firmicutes_A;c__Clostridia;o__Oscillospirales;f__Oscillospiraceae;g__CAG-110;s__CAG-110 sp900762245	blast	92.1	None
RGVC33	GB_GCA_900763965.1	d__Bacteria;p__Firmicutes_A;c__Clostridia;o__Oscillospirales;f__Oscillospiraceae;g__CAG-110;s__CAG-110 sp900763965	blast	92.1	None
RGVC33	GB_GCA_900769845.1	d__Bacteria;p__Firmicutes_A;c__Clostridia;o__Oscillospirales;f__Oscillospiraceae;g__CAG-110;s__CAG-110 sp900769845	blast	92.1	None
RGVC33	GB_GCA_900770015.1	d__Bacteria;p__Firmicutes_A;c__Clostridia;o__Oscillospirales;f__Oscillospiraceae;g__CAG-110;s__CAG-110 sp900770015	blast	92	None
RGVC34	GB_GCA_900553145.1	d__Bacteria;p__Desulfobacterota;c__Desulfovibrionia;o__Desulfovibrionales;f__Desulfovibrionaceae;g__Bilophila;s__Bilophila sp900553145	blast	92.4	iPHoP-RF;60.30
RGVC34	RS_GCF_000701705.1	d__Bacteria;p__Desulfobacterota;c__Desulfovibrionia;o__Desulfovibrionales;f__Desulfovibrionaceae;g__Bilophila;s__Bilophila wadsworthia	blast	94.7	iPHoP-RF;64.50
RGVC36	GB_GCA_001941065.1	d__Bacteria;p__Bacteroidota;c__Bacteroidia;o__Bacteroidales;f__Rikenellaceae;g__Alistipes;s__Alistipes sp001941065	iPHoP-RF	91.1	None
RGVC36	GB_GCA_002428825.1	d__Bacteria;p__Bacteroidota;c__Bacteroidia;o__Bacteroidales;f__Rikenellaceae;g__Alistipes;s__Alistipes sp002428825	blast	90.2	iPHoP-RF;89.80
RGVC36	GB_GCA_900760675.1	d__Bacteria;p__Bacteroidota;c__Bacteroidia;o__Bacteroidales;f__Rikenellaceae;g__Alistipes;s__Alistipes sp900760675	iPHoP-RF	90.8	None
RGVC36	RS_GCF_000154465.1	d__Bacteria;p__Bacteroidota;c__Bacteroidia;o__Bacteroidales;f__Rikenellaceae;g__Alistipes;s__Alistipes putredinis	blast	96.6	iPHoP-RF;84.50
RGVC36	RS_GCF_000374505.1	d__Bacteria;p__Bacteroidota;c__Bacteroidia;o__Bacteroidales;f__Rikenellaceae;g__Alistipes;s__Alistipes onderdonkii	blast	90	iPHoP-RF;81.10
RGVC37	3300018475_114	d__Bacteria;p__Firmicutes_A;c__Clostridia;o__Oscillospirales;f__UBA644;g__;s__	blast	92.1	None
RGVC39	3300023033_2	d__Bacteria;p__Firmicutes_A;c__Clostridia;o__Oscillospirales;f__Acutalibacteraceae;g__CAG-180;s__	blast	91.9	None
RGVC39	GB_GCA_002490425.1	d__Bacteria;p__Firmicutes_A;c__Clostridia;o__Oscillospirales;f__Acutalibacteraceae;g__CAG-180;s__CAG-180 sp002490425	blast	91.7	iPHoP-RF;52.00
RGVC41	GB_GCA_003018335.1	d__Bacteria;p__Proteobacteria;c__Gammaproteobacteria;o__Enterobacterales;f__Enterobacteriaceae;g__Escherichia;s__Escherichia coli_C	iPHoP-RF	96.7	None
RGVC41	RS_GCF_000026225.1	d__Bacteria;p__Proteobacteria;c__Gammaproteobacteria;o__Enterobacterales;f__Enterobacteriaceae;g__Escherichia;s__Escherichia fergusonii	iPHoP-RF	94.1	None
RGVC41	RS_GCF_000026325.1	d__Bacteria;p__Proteobacteria;c__Gammaproteobacteria;o__Enterobacterales;f__Enterobacteriaceae;g__Escherichia;s__Escherichia coli_D	blast	96.9	iPHoP-RF;96.70
RGVC41	RS_GCF_000208585.1	d__Bacteria;p__Proteobacteria;c__Gammaproteobacteria;o__Enterobacterales;f__Enterobacteriaceae;g__Escherichia;s__Escherichia sp000208585	blast	96.9	iPHoP-RF;96.70
RGVC41	RS_GCF_001660175.1	d__Bacteria;p__Proteobacteria;c__Gammaproteobacteria;o__Enterobacterales;f__Enterobacteriaceae;g__Escherichia;s__Escherichia sp001660175	iPHoP-RF	97.1	None
RGVC41	RS_GCF_002900365.1	d__Bacteria;p__Proteobacteria;c__Gammaproteobacteria;o__Enterobacterales;f__Enterobacteriaceae;g__Escherichia;s__Escherichia marmotae	iPHoP-RF	97.1	blast;96.90
RGVC41	RS_GCF_002949675.1	d__Bacteria;p__Proteobacteria;c__Gammaproteobacteria;o__Enterobacterales;f__Enterobacteriaceae;g__Escherichia;s__Escherichia dysenteriae	iPHoP-RF	97.1	blast;96.90
RGVC41	RS_GCF_002950215.1	d__Bacteria;p__Proteobacteria;c__Gammaproteobacteria;o__Enterobacterales;f__Enterobacteriaceae;g__Escherichia;s__Escherichia flexneri	blast	96.9	iPHoP-RF;96.70
RGVC41	RS_GCF_002965065.1	d__Bacteria;p__Proteobacteria;c__Gammaproteobacteria;o__Enterobacterales;f__Enterobacteriaceae;g__Escherichia;s__Escherichia sp002965065	iPHoP-RF	97.1	None
RGVC41	RS_GCF_003697165.2	d__Bacteria;p__Proteobacteria;c__Gammaproteobacteria;o__Enterobacterales;f__Enterobacteriaceae;g__Escherichia;s__Escherichia coli	iPHoP-RF	97.1	blast;96.90
RGVC41	RS_GCF_004211955.1	d__Bacteria;p__Proteobacteria;c__Gammaproteobacteria;o__Enterobacterales;f__Enterobacteriaceae;g__Escherichia;s__Escherichia sp004211955	iPHoP-RF	96.7	None
RGVC41	RS_GCF_005843885.1	d__Bacteria;p__Proteobacteria;c__Gammaproteobacteria;o__Enterobacterales;f__Enterobacteriaceae;g__Escherichia;s__Escherichia sp005843885	iPHoP-RF	97.1	None
RGVC41	RS_GCF_011881725.1	d__Bacteria;p__Proteobacteria;c__Gammaproteobacteria;o__Enterobacterales;f__Enterobacteriaceae;g__Escherichia;s__Escherichia coli_E	iPHoP-RF	96.7	None
RGVC42	GB_GCA_002431945.1	d__Bacteria;p__Firmicutes_A;c__Clostridia;o__Oscillospirales;f__Acutalibacteraceae;g__UBA737;s__UBA737 sp002431945	blast	96.6	None
RGVC42	GB_GCA_900549055.1	d__Bacteria;p__Firmicutes_A;c__Clostridia;o__Oscillospirales;f__Acutalibacteraceae;g__UBA737;s__UBA737 sp900549055	blast	96.2	None
RGVC45	RS_GCF_900461125.1	d__Bacteria;p__Firmicutes_A;c__Clostridia;o__Lachnospirales;f__Lachnospiraceae;g__Blautia;s__Blautia coccoides	blast	92.3	None
RGVC48	RS_GCF_900116855.1	d__Bacteria;p__Firmicutes_A;c__Clostridia;o__Oscillospirales;f__Ruminococcaceae;g__Ruminococcus;s__Ruminococcus flavefaciens_R	blast	93.9	iPHoP-RF;77.30
RGVC48	RS_GCF_902760805.1	d__Bacteria;p__Firmicutes_A;c__Clostridia;o__Oscillospirales;f__Ruminococcaceae;g__Ruminococcus;s__Ruminococcus sp002394695	blast	91.8	iPHoP-RF;68.90
RGVC49	GB_GCA_900079765.1	d__Bacteria;p__Firmicutes_A;c__Clostridia;o__Oscillospirales;f__Oscillospiraceae;g__Pseudoflavonifractor;s__Pseudoflavonifractor sp900079765	blast	92.1	None
RGVC49	GB_GCA_900540545.1	d__Bacteria;p__Firmicutes_A;c__Clostridia;o__Oscillospirales;f__Oscillospiraceae;g__Intestinimonas;s__Intestinimonas sp900540545	blast	90.6	None
RGVC49	GB_GCA_900543935.1	d__Bacteria;p__Firmicutes_A;c__Clostridia;o__Oscillospirales;f__Oscillospiraceae;g__Marseille-P3106;s__Marseille-P3106 sp900543935	blast	90.8	None
RGVC49	RS_GCF_000169255.2	d__Bacteria;p__Firmicutes_A;c__Clostridia;o__Oscillospirales;f__Oscillospiraceae;g__Pseudoflavonifractor;s__Pseudoflavonifractor capillosus	blast	92.1	None
RGVC49	RS_GCF_000239295.1	d__Bacteria;p__Firmicutes_A;c__Clostridia;o__Oscillospirales;f__Oscillospiraceae;g__Flavonifractor;s__Flavonifractor plautii	blast	92.1	iPHoP-RF;77.30
RGVC49	RS_GCF_000508885.1	d__Bacteria;p__Firmicutes_A;c__Clostridia;o__Oscillospirales;f__Oscillospiraceae;g__Flavonifractor;s__Flavonifractor sp000508885	blast	91.9	None
RGVC49	RS_GCF_001244995.1	d__Bacteria;p__Firmicutes_A;c__Clostridia;o__Oscillospirales;f__Oscillospiraceae;g__Intestinimonas;s__Intestinimonas massiliensis	blast	92	None
RGVC49	RS_GCF_002159175.1	d__Bacteria;p__Firmicutes_A;c__Clostridia;o__Oscillospirales;f__Oscillospiraceae;g__An92;s__An92 sp002159175	blast	92.1	None
RGVC49	RS_GCF_002159265.1	d__Bacteria;p__Firmicutes_A;c__Clostridia;o__Oscillospirales;f__Oscillospiraceae;g__Flavonifractor;s__Flavonifractor sp002159265	blast	90.9	None
RGVC49	RS_GCF_002159455.1	d__Bacteria;p__Firmicutes_A;c__Clostridia;o__Oscillospirales;f__Oscillospiraceae;g__Flavonifractor;s__Flavonifractor sp002159455	blast	90.9	iPHoP-RF;54.60
RGVC49	RS_GCF_002161085.1	d__Bacteria;p__Firmicutes_A;c__Clostridia;o__Oscillospirales;f__Oscillospiraceae;g__Flavonifractor;s__Flavonifractor sp002161085	blast	90.9	None
RGVC49	RS_GCF_002161215.1	d__Bacteria;p__Firmicutes_A;c__Clostridia;o__Oscillospirales;f__Oscillospiraceae;g__Flavonifractor;s__Flavonifractor sp002161215	blast	91.2	iPHoP-RF;71.70
RGVC49	RS_GCF_003573975.1	d__Bacteria;p__Firmicutes_A;c__Clostridia;o__Oscillospirales;f__Oscillospiraceae;g__Lawsonibacter;s__Lawsonibacter sp900066825	blast	90.3	None
RGVC49	RS_GCF_014281125.1	d__Bacteria;p__Firmicutes_A;c__Clostridia;o__Oscillospirales;f__Oscillospiraceae;g__Flavonifractor;s__Flavonifractor gabonensis	blast	92.1	iPHoP-RF;59.50
RGVC49	RS_GCF_014287675.1	d__Bacteria;p__Firmicutes_A;c__Clostridia;o__Oscillospirales;f__Oscillospiraceae;g__Pseudoflavonifractor;s__Pseudoflavonifractor sp014287675	blast	92.1	None
RGVC49	RS_GCF_014287895.1	d__Bacteria;p__Firmicutes_A;c__Clostridia;o__Oscillospirales;f__Oscillospiraceae;g__Flavonifractor;s__Flavonifractor sp900549795	blast	92	iPHoP-RF;55.20
RGVC49	RS_GCF_900199495.1	d__Bacteria;p__Firmicutes_A;c__Clostridia;o__Oscillospirales;f__Oscillospiraceae;g__An92;s__An92 sp900199495	blast	91.9	None
RGVC49	RS_GCF_900626145.1	d__Bacteria;p__Firmicutes_A;c__Clostridia;o__Oscillospirales;f__Oscillospiraceae;g__Intestinimonas;s__Intestinimonas timonensis	blast	93.9	None
RGVC49	RS_GCF_900626285.1	d__Bacteria;p__Firmicutes_A;c__Clostridia;o__Oscillospirales;f__Oscillospiraceae;g__Flavonifractor;s__Flavonifractor massiliensis_A	blast	91.9	None
RGVC49	RS_GCF_902363045.1	d__Bacteria;p__Firmicutes_A;c__Clostridia;o__Oscillospirales;f__Oscillospiraceae;g__Lawsonibacter;s__Lawsonibacter sp902363045	blast	90.6	None
RGVC51	GB_GCA_000434635.1	d__Bacteria;p__Firmicutes_A;c__Clostridia;o__Oscillospirales;f__Oscillospiraceae;g__CAG-110;s__CAG-110 sp000434635	blast	96.9	iPHoP-RF;53.30
RGVC51	GB_GCA_002436765.1	d__Bacteria;p__Firmicutes_A;c__Clostridia;o__Oscillospirales;f__Oscillospiraceae;g__CAG-110;s__CAG-110 sp002436765	blast	96.8	iPHoP-RF;68.20
RGVC51	3300010259_5	d__Bacteria;p__Firmicutes_A;c__Clostridia;o__Oscillospirales;f__Oscillospiraceae;g__CAG-110;s__	blast	93.1	None
RGVC51	GB_GCA_900546075.1	d__Bacteria;p__Firmicutes_A;c__Clostridia;o__Oscillospirales;f__Oscillospiraceae;g__CAG-110;s__CAG-110 sp900546075	blast	90.3	None
RGVC52	3300019375_7	d__Bacteria;p__Firmicutes_A;c__Clostridia;o__Lachnospirales;f__Lachnospiraceae;g__RUG191;s__	blast	93.5	iPHoP-RF;59.20
RGVC53	RS_GCF_005121165.1	d__Bacteria;p__Firmicutes_A;c__Clostridia;o__Oscillospirales;f__Oscillospiraceae;g__Dysosmobacter;s__Dysosmobacter welbionis	blast	92.7	None
RGVC54	RS_GCF_001404675.1	d__Bacteria;p__Firmicutes_A;c__Clostridia;o__Lachnospirales;f__Lachnospiraceae;g__Coprococcus;s__Coprococcus eutactus_A	blast	91.7	None
RGVC55	RS_GCF_000154345.1	d__Bacteria;p__Firmicutes_A;c__Clostridia;o__Oscillospirales;f__Acutalibacteraceae;g__Clostridium_A;s__Clostridium_A leptum	blast	93.4	None
RGVC56	GB_GCA_900066355.1	d__Bacteria;p__Firmicutes_A;c__Clostridia;o__Lachnospirales;f__Lachnospiraceae;g__Blautia_A;s__Blautia_A sp900066355	blast	91.7	None
RGVC56	RS_GCF_900120195.1	d__Bacteria;p__Firmicutes_A;c__Clostridia;o__Lachnospirales;f__Lachnospiraceae;g__Blautia_A;s__Blautia_A sp900120195	blast	91.7	iPHoP-RF;62.50
RGVC57	3300018878_162	d__Bacteria;p__Firmicutes_A;c__Clostridia;o__Oscillospirales;f__Oscillospiraceae;g__;s__	blast	93.1	None
RGVC59	GB_GCA_000432135.1	d__Bacteria;p__Firmicutes_A;c__Clostridia;o__Oscillospirales;f__Oscillospiraceae;g__CAG-170;s__CAG-170 sp000432135	blast	92.3	iPHoP-RF;80.30
RGVC60	RS_GCF_002834225.1	d__Bacteria;p__Firmicutes_A;c__Clostridia;o__Oscillospirales;f__Acutalibacteraceae;g__Ruminococcus_E;s__Ruminococcus_E bromii	blast	90.1	iPHoP-RF;52.20
RGVC60	RS_GCF_002834235.1	d__Bacteria;p__Firmicutes_A;c__Clostridia;o__Oscillospirales;f__Acutalibacteraceae;g__Ruminococcus_E;s__Ruminococcus_E bromii_B	blast	92.1	None
RGVC60	RS_GCF_014288065.1	d__Bacteria;p__Firmicutes_A;c__Clostridia;o__Oscillospirales;f__Acutalibacteraceae;g__Ruminococcus_E;s__Ruminococcus_E sp003526955	blast	91.7	None
RGVC61	3300010262_15	d__Bacteria;p__Firmicutes_A;c__Clostridia;o__Oscillospirales;f__Oscillospiraceae;g__Dysosmobacter;s__	blast	91.4	None
RGVC61	3300012889_21	d__Bacteria;p__Firmicutes_A;c__Clostridia;o__Oscillospirales;f__Oscillospiraceae;g__;s__	blast	92	None
RGVC61	GB_GCA_000436875.1	d__Bacteria;p__Firmicutes_A;c__Clostridia;o__Oscillospirales;f__Oscillospiraceae;g__Dysosmobacter;s__Dysosmobacter sp000436875	blast	90.6	None
RGVC61	GB_GCA_004558115.1	d__Bacteria;p__Firmicutes_A;c__Clostridia;o__Oscillospirales;f__Oscillospiraceae;g__Dysosmobacter;s__Dysosmobacter sp004558115	blast	91.5	iPHoP-RF;72.20
RGVC61	GB_GCA_009773995.1	d__Bacteria;p__Firmicutes_A;c__Clostridia;o__Oscillospirales;f__Oscillospiraceae;g__Dysosmobacter;s__Dysosmobacter sp009773995	blast	90.3	None
RGVC61	GB_GCA_009774015.1	d__Bacteria;p__Firmicutes_A;c__Clostridia;o__Oscillospirales;f__Oscillospiraceae;g__Dysosmobacter;s__Dysosmobacter sp009774015	blast	90.3	None
RGVC61	GB_GCA_900542115.1	d__Bacteria;p__Firmicutes_A;c__Clostridia;o__Oscillospirales;f__Oscillospiraceae;g__Dysosmobacter;s__Dysosmobacter sp900542115	blast	90.9	iPHoP-RF;64.80
RGVC61	GB_GCA_900544105.1	d__Bacteria;p__Firmicutes_A;c__Clostridia;o__Oscillospirales;f__Oscillospiraceae;g__Dysosmobacter;s__Dysosmobacter sp900544105	blast	90.9	iPHoP-RF;60.60
RGVC61	GB_GCA_900544615.1	d__Bacteria;p__Firmicutes_A;c__Clostridia;o__Oscillospirales;f__Oscillospiraceae;g__Dysosmobacter;s__Dysosmobacter sp900544615	blast	91	iPHoP-RF;67.30
RGVC61	GB_GCA_900544955.1	d__Bacteria;p__Firmicutes_A;c__Clostridia;o__Oscillospirales;f__Oscillospiraceae;g__Dysosmobacter;s__Dysosmobacter sp900544955	blast	91.6	iPHoP-RF;68.40
RGVC61	GB_GCA_900546705.1	d__Bacteria;p__Firmicutes_A;c__Clostridia;o__Oscillospirales;f__Oscillospiraceae;g__Dysosmobacter;s__Dysosmobacter sp900546705	blast	91.4	iPHoP-RF;78.30
RGVC61	GB_GCA_900548505.1	d__Bacteria;p__Firmicutes_A;c__Clostridia;o__Oscillospirales;f__Oscillospiraceae;g__Dysosmobacter;s__Dysosmobacter sp900548505	blast	91.2	None
RGVC61	GB_GCA_900550685.1	d__Bacteria;p__Firmicutes_A;c__Clostridia;o__Oscillospirales;f__Oscillospiraceae;g__Dysosmobacter;s__Dysosmobacter sp900550685	blast	91	iPHoP-RF;62.70
RGVC61	GB_GCA_900551885.1	d__Bacteria;p__Firmicutes_A;c__Clostridia;o__Oscillospirales;f__Oscillospiraceae;g__Dysosmobacter;s__Dysosmobacter sp900551885	blast	90.4	None
RGVC61	GB_GCA_900554425.1	d__Bacteria;p__Firmicutes_A;c__Clostridia;o__Oscillospirales;f__Oscillospiraceae;g__Dysosmobacter;s__Dysosmobacter sp900554425	blast	90.5	iPHoP-RF;59.20
RGVC61	GB_GCA_900752075.1	d__Bacteria;p__Firmicutes_A;c__Clostridia;o__Oscillospirales;f__Oscillospiraceae;g__Dysosmobacter;s__Dysosmobacter sp900752075	blast	91.4	iPHoP-RF;56.20
RGVC61	GB_GCA_900763685.1	d__Bacteria;p__Firmicutes_A;c__Clostridia;o__Oscillospirales;f__Oscillospiraceae;g__Dysosmobacter;s__Dysosmobacter sp900763685	blast	90.8	None
RGVC61	GB_GCA_900770295.1	d__Bacteria;p__Firmicutes_A;c__Clostridia;o__Oscillospirales;f__Oscillospiraceae;g__Dysosmobacter;s__Dysosmobacter sp900770295	blast	91.5	iPHoP-RF;55.40
RGVC61	RS_GCF_000283575.1	d__Bacteria;p__Firmicutes_A;c__Clostridia;o__Oscillospirales;f__Oscillospiraceae;g__Oscillibacter;s__Oscillibacter valericigenes	blast	92	iPHoP-RF;54.40
RGVC61	RS_GCF_000307265.1	d__Bacteria;p__Firmicutes_A;c__Clostridia;o__Oscillospirales;f__Oscillospiraceae;g__Oscillibacter;s__Oscillibacter ruminantium	blast	91.9	iPHoP-RF;54.60
RGVC61	RS_GCF_000403435.2	d__Bacteria;p__Firmicutes_A;c__Clostridia;o__Oscillospirales;f__Oscillospiraceae;g__Dysosmobacter;s__Dysosmobacter sp000403435	blast	90.9	iPHoP-RF;53.60
RGVC61	RS_GCF_005121165.1	d__Bacteria;p__Firmicutes_A;c__Clostridia;o__Oscillospirales;f__Oscillospiraceae;g__Dysosmobacter;s__Dysosmobacter welbionis	blast	93.7	None
RGVC61	RS_GCF_014297285.1	d__Bacteria;p__Firmicutes_A;c__Clostridia;o__Oscillospirales;f__Oscillospiraceae;g__Dysosmobacter;s__Dysosmobacter sp001916835	blast	90.9	iPHoP-RF;59.20
RGVC61	RS_GCF_014297375.1	d__Bacteria;p__Firmicutes_A;c__Clostridia;o__Oscillospirales;f__Oscillospiraceae;g__Dysosmobacter;s__Dysosmobacter sp014297375	blast	90.7	None
RGVC61	RS_GCF_014334055.1	d__Bacteria;p__Firmicutes_A;c__Clostridia;o__Oscillospirales;f__Oscillospiraceae;g__NSJ-62;s__NSJ-62 sp014334055	blast	92.1	iPHoP-RF;63.80
RGVC63	RS_GCF_002910915.1	d__Bacteria;p__Actinobacteriota;c__Actinomycetia;o__Streptomycetales;f__Streptomycetaceae;g__Streptomyces;s__Streptomyces sp002910915	blast	96.9	None
RGVC63	RS_GCF_003121295.1	d__Bacteria;p__Actinobacteriota;c__Actinomycetia;o__Streptomycetales;f__Streptomycetaceae;g__Streptomyces;s__Streptomyces orinoci	blast	96.9	None
RGVC64	GB_GCA_900540045.1	d__Bacteria;p__Firmicutes_A;c__Clostridia_A;o__Christensenellales;f__CAG-74;g__Firm-11;s__Firm-11 sp900540045	blast	96.9	iPHoP-RF;54.90
RGVC64	3300022660_71	d__Bacteria;p__Firmicutes_A;c__Clostridia_A;o__Christensenellales;f__CAG-74;g__Firm-11;s__	blast	96.7	None
RGVC65	RS_GCF_014334055.1	d__Bacteria;p__Firmicutes_A;c__Clostridia;o__Oscillospirales;f__Oscillospiraceae;g__NSJ-62;s__NSJ-62 sp014334055	blast	92.8	None
RGVC66	3300029583_30	d__Bacteria;p__Firmicutes_A;c__Clostridia;o__Oscillospirales;f__Oscillospiraceae;g__CAG-170;s__	blast	91.7	iPHoP-RF;73.20
RGVC66	GB_GCA_000432135.1	d__Bacteria;p__Firmicutes_A;c__Clostridia;o__Oscillospirales;f__Oscillospiraceae;g__CAG-170;s__CAG-170 sp000432135	blast	96.9	iPHoP-RF;71.30
RGVC66	GB_GCA_002404795.1	d__Bacteria;p__Firmicutes_A;c__Clostridia;o__Oscillospirales;f__Oscillospiraceae;g__CAG-170;s__CAG-170 sp002404795	blast	96.9	iPHoP-RF;87.30
RGVC67	3300010280_45	d__Bacteria;p__Firmicutes_A;c__Clostridia;o__Oscillospirales;f__Oscillospiraceae;g__UBA1777;s__	blast	93.9	None
RGVC68	GB_GCA_900554515.1	d__Bacteria;p__Firmicutes_C;c__Negativicutes;o__Acidaminococcales;f__Acidaminococcaceae;g__Acidaminococcus;s__Acidaminococcus sp900554515	blast	96.9	iPHoP-RF;62.20
RGVC68	RS_GCF_000025305.1	d__Bacteria;p__Firmicutes_C;c__Negativicutes;o__Acidaminococcales;f__Acidaminococcaceae;g__Acidaminococcus;s__Acidaminococcus fermentans	CRISPR	98.5	blast;96.90 iPHoP-RF;83.30
RGVC68	RS_GCF_000425045.1	d__Bacteria;p__Firmicutes_C;c__Negativicutes;o__Acidaminococcales;f__Acidaminococcaceae;g__Acidaminococcus;s__Acidaminococcus intestini	blast	96.9	iPHoP-RF;78.00 CRISPR;51.50
RGVC68	RS_GCF_009696675.1	d__Bacteria;p__Firmicutes_C;c__Negativicutes;o__Acidaminococcales;f__Acidaminococcaceae;g__Acidaminococcus;s__Acidaminococcus sp000437815	CRISPR	96.9	blast;96.50 iPHoP-RF;83.10
RGVC68	RS_GCF_900291475.1	d__Bacteria;p__Firmicutes_C;c__Negativicutes;o__Acidaminococcales;f__Acidaminococcaceae;g__Acidaminococcus;s__Acidaminococcus provencensis	blast	96.2	None
RGVC71	GB_GCA_900756495.1	d__Bacteria;p__Firmicutes_A;c__Clostridia;o__Oscillospirales;f__Oscillospiraceae;g__HGM12998;s__HGM12998 sp900756495	blast	91.1	None
RGVC73	GB_GCA_003526375.1	d__Bacteria;p__Verrucomicrobiota;c__Lentisphaeria;o__Victivallales;f__UBA1829;g__UBA11452;s__UBA11452 sp003526375	blast	92	iPHoP-RF;71.70
RGVC74	RS_GCF_900537995.1	d__Bacteria;p__Firmicutes_A;c__Clostridia;o__Lachnospirales;f__Lachnospiraceae;g__Roseburia;s__Roseburia intestinalis	blast	92.5	iPHoP-RF;65.10
RGVC74	RS_GCF_000020605.1	d__Bacteria;p__Firmicutes_A;c__Clostridia;o__Lachnospirales;f__Lachnospiraceae;g__Agathobacter;s__Agathobacter rectalis	blast	91.7	None
RGVC75	GB_GCA_002362625.1	d__Bacteria;p__Firmicutes_A;c__Clostridia;o__Oscillospirales;f__Oscillospiraceae;g__CAG-110;s__CAG-110 sp002362625	blast	90	None
RGVC75	GB_GCA_004562395.1	d__Bacteria;p__Firmicutes_A;c__Clostridia;o__Oscillospirales;f__Oscillospiraceae;g__CAG-110;s__CAG-110 sp004562395	blast	93.5	None
RGVC75	GB_GCA_900544945.1	d__Bacteria;p__Firmicutes_A;c__Clostridia;o__Oscillospirales;f__Oscillospiraceae;g__CAG-110;s__CAG-110 sp900544945	blast	91.9	None
RGVC75	GB_GCA_900762245.1	d__Bacteria;p__Firmicutes_A;c__Clostridia;o__Oscillospirales;f__Oscillospiraceae;g__CAG-110;s__CAG-110 sp900762245	blast	91.8	None
RGVC76	3300023039_1	d__Bacteria;p__Bacteroidota;c__Bacteroidia;o__Bacteroidales;f__Bacteroidaceae;g__;s__	blast	91.7	None
RGVC76	GB_GCA_000434235.1	d__Bacteria;p__Bacteroidota;c__Bacteroidia;o__Bacteroidales;f__Rikenellaceae;g__Alistipes;s__Alistipes sp000434235	blast	90.7	None
RGVC76	RS_GCF_000265365.1	d__Bacteria;p__Bacteroidota;c__Bacteroidia;o__Bacteroidales;f__Rikenellaceae;g__Alistipes;s__Alistipes finegoldii	blast	96.9	None
RGVC76	RS_GCF_000374505.1	d__Bacteria;p__Bacteroidota;c__Bacteroidia;o__Bacteroidales;f__Rikenellaceae;g__Alistipes;s__Alistipes onderdonkii	blast	96.8	None
RGVC77	3300019376_18	d__Bacteria;p__Firmicutes_A;c__Clostridia_A;o__Christensenellales;f__CAG-74;g__Firm-11;s__	blast	91.8	None
RGVC77	3300022660_71	d__Bacteria;p__Firmicutes_A;c__Clostridia_A;o__Christensenellales;f__CAG-74;g__Firm-11;s__	blast	96.7	None
RGVC77	GB_GCA_000431575.1	d__Bacteria;p__Firmicutes_A;c__Clostridia;o__Oscillospirales;f__Oscillospiraceae;g__CAG-83;s__CAG-83 sp000431575	blast	95.5	None
RGVC77	GB_GCA_000435555.1	d__Bacteria;p__Firmicutes_A;c__Clostridia;o__Oscillospirales;f__Oscillospiraceae;g__CAG-83;s__CAG-83 sp000435555	blast	90.7	None
RGVC77	GB_GCA_000435975.1	d__Bacteria;p__Firmicutes_A;c__Clostridia;o__Oscillospirales;f__Oscillospiraceae;g__CAG-83;s__CAG-83 sp000435975	blast	94.8	None
RGVC77	GB_GCA_001916855.1	d__Bacteria;p__Firmicutes_A;c__Clostridia;o__Oscillospirales;f__Oscillospiraceae;g__CAG-83;s__CAG-83 sp001916855	blast	94.5	None
RGVC77	GB_GCA_004556545.1	d__Bacteria;p__Firmicutes_A;c__Clostridia_A;o__Christensenellales;f__CAG-74;g__Firm-11;s__Firm-11 sp004556545	blast	93.8	None
RGVC77	GB_GCA_900540045.1	d__Bacteria;p__Firmicutes_A;c__Clostridia_A;o__Christensenellales;f__CAG-74;g__Firm-11;s__Firm-11 sp900540045	blast	93.4	None
RGVC77	GB_GCA_900548145.1	d__Bacteria;p__Firmicutes_A;c__Clostridia_A;o__Christensenellales;f__CAG-74;g__Firm-11;s__Firm-11 sp900548145	blast	95.8	None
RGVC77	GB_GCA_900550955.1	d__Bacteria;p__Firmicutes_A;c__Clostridia_A;o__Christensenellales;f__CAG-74;g__Firm-11;s__Firm-11 sp900550955	blast	91.3	None
RGVC77	GB_GCA_900553905.1	d__Bacteria;p__Firmicutes_A;c__Clostridia_A;o__Christensenellales;f__CAG-74;g__Firm-11;s__Firm-11 sp900553905	blast	90.3	None
RGVC77	GB_GCA_900556015.1	d__Bacteria;p__Firmicutes_A;c__Clostridia;o__Oscillospirales;f__Oscillospiraceae;g__CAG-83;s__CAG-83 sp900556015	blast	90.1	None
RGVC77	GB_GCA_900768135.1	d__Bacteria;p__Firmicutes_A;c__Clostridia;o__Oscillospirales;f__Oscillospiraceae;g__ER4;s__ER4 sp900768135	blast	90.4	None
RGVC79	3300022660_140	d__Bacteria;p__Firmicutes_A;c__Clostridia;o__Oscillospirales;f__Oscillospiraceae;g__CAG-110;s__	blast	90.5	None
RGVC79	GB_GCA_000436735.1	d__Bacteria;p__Firmicutes_A;c__Clostridia;o__Oscillospirales;f__Oscillospiraceae;g__CAG-170;s__CAG-170 sp000436735	blast	90.1	None
RGVC79	GB_GCA_003516765.1	d__Bacteria;p__Firmicutes_A;c__Clostridia;o__Oscillospirales;f__Oscillospiraceae;g__CAG-170;s__CAG-170 sp003516765	blast	93.7	None
RGVC79	GB_GCA_900549705.1	d__Bacteria;p__Firmicutes_A;c__Clostridia;o__Oscillospirales;f__Oscillospiraceae;g__CAG-110;s__CAG-110 sp900549705	blast	91.2	None
RGVC79	GB_GCA_902388735.1	d__Bacteria;p__Firmicutes_A;c__Clostridia;o__Oscillospirales;f__Oscillospiraceae;g__CAG-83;s__CAG-83 sp902388735	blast	90.8	None
RGVC81	3300022661_60	d__Bacteria;p__Firmicutes_A;c__Clostridia;o__Oscillospirales;f__CAG-272;g__UMGS1696;s__	blast	91.5	None
RGVC81	RS_GCF_900753285.1	d__Bacteria;p__Firmicutes_A;c__Clostridia;o__Oscillospirales;f__CAG-272;g__UMGS1696;s__UMGS1696 sp900753285	blast	92.5	None
RGVC82	3300022660_169	d__Bacteria;p__Firmicutes_A;c__Clostridia_A;o__Christensenellales;f__Borkfalkiaceae;g__UBA1259;s__	blast	91.9	None
RGVC82	RS_GCF_900771345.1	d__Bacteria;p__Firmicutes_A;c__Clostridia_A;o__Christensenellales;f__Borkfalkiaceae;g__UBA1259;s__UBA1259 sp900771345	blast	91.2	None
RGVC83	3300010262_15	d__Bacteria;p__Firmicutes_A;c__Clostridia;o__Oscillospirales;f__Oscillospiraceae;g__Dysosmobacter;s__	blast	90.5	None
RGVC83	3300010278_23	d__Bacteria;p__Firmicutes_A;c__Clostridia;o__Oscillospirales;f__Oscillospiraceae;g__Dysosmobacter;s__	blast	92.1	iPHoP-RF;63.00
RGVC83	3300010282_24	d__Bacteria;p__Firmicutes_A;c__Clostridia;o__Oscillospirales;f__Oscillospiraceae;g__;s__	blast	90.2	iPHoP-RF;53.60
RGVC83	3300012889_21	d__Bacteria;p__Firmicutes_A;c__Clostridia;o__Oscillospirales;f__Oscillospiraceae;g__;s__	blast	91	None
RGVC83	GB_GCA_000436875.1	d__Bacteria;p__Firmicutes_A;c__Clostridia;o__Oscillospirales;f__Oscillospiraceae;g__Dysosmobacter;s__Dysosmobacter sp000436875	blast	90	iPHoP-RF;58.70
RGVC83	GB_GCA_004553545.1	d__Bacteria;p__Firmicutes_A;c__Clostridia;o__Oscillospirales;f__Oscillospiraceae;g__Dysosmobacter;s__Dysosmobacter sp004553545	blast	90.5	iPHoP-RF;61.70
RGVC83	GB_GCA_004558115.1	d__Bacteria;p__Firmicutes_A;c__Clostridia;o__Oscillospirales;f__Oscillospiraceae;g__Dysosmobacter;s__Dysosmobacter sp004558115	blast	92.1	iPHoP-RF;66.50
RGVC83	GB_GCA_900544615.1	d__Bacteria;p__Firmicutes_A;c__Clostridia;o__Oscillospirales;f__Oscillospiraceae;g__Dysosmobacter;s__Dysosmobacter sp900544615	blast	90.5	iPHoP-RF;61.90
RGVC83	GB_GCA_900544955.1	d__Bacteria;p__Firmicutes_A;c__Clostridia;o__Oscillospirales;f__Oscillospiraceae;g__Dysosmobacter;s__Dysosmobacter sp900544955	blast	90.5	iPHoP-RF;65.60
RGVC83	GB_GCA_900546705.1	d__Bacteria;p__Firmicutes_A;c__Clostridia;o__Oscillospirales;f__Oscillospiraceae;g__Dysosmobacter;s__Dysosmobacter sp900546705	blast	90.4	iPHoP-RF;64.00
RGVC83	GB_GCA_900548505.1	d__Bacteria;p__Firmicutes_A;c__Clostridia;o__Oscillospirales;f__Oscillospiraceae;g__Dysosmobacter;s__Dysosmobacter sp900548505	blast	90.4	iPHoP-RF;66.30
RGVC83	GB_GCA_900550685.1	d__Bacteria;p__Firmicutes_A;c__Clostridia;o__Oscillospirales;f__Oscillospiraceae;g__Dysosmobacter;s__Dysosmobacter sp900550685	blast	90.5	iPHoP-RF;67.70
RGVC83	GB_GCA_900551885.1	d__Bacteria;p__Firmicutes_A;c__Clostridia;o__Oscillospirales;f__Oscillospiraceae;g__Dysosmobacter;s__Dysosmobacter sp900551885	blast	90	iPHoP-RF;58.20
RGVC83	GB_GCA_900752075.1	d__Bacteria;p__Firmicutes_A;c__Clostridia;o__Oscillospirales;f__Oscillospiraceae;g__Dysosmobacter;s__Dysosmobacter sp900752075	blast	90.4	iPHoP-RF;68.60
RGVC83	GB_GCA_900770295.1	d__Bacteria;p__Firmicutes_A;c__Clostridia;o__Oscillospirales;f__Oscillospiraceae;g__Dysosmobacter;s__Dysosmobacter sp900770295	blast	90.6	iPHoP-RF;65.80
RGVC83	RS_GCF_000283575.1	d__Bacteria;p__Firmicutes_A;c__Clostridia;o__Oscillospirales;f__Oscillospiraceae;g__Oscillibacter;s__Oscillibacter valericigenes	blast	90.2	iPHoP-RF;56.80
RGVC83	RS_GCF_000403435.2	d__Bacteria;p__Firmicutes_A;c__Clostridia;o__Oscillospirales;f__Oscillospiraceae;g__Dysosmobacter;s__Dysosmobacter sp000403435	blast	90.2	iPHoP-RF;53.30
RGVC83	RS_GCF_005121165.1	d__Bacteria;p__Firmicutes_A;c__Clostridia;o__Oscillospirales;f__Oscillospiraceae;g__Dysosmobacter;s__Dysosmobacter welbionis	blast	96.9	iPHoP-RF;64.50
RGVC83	RS_GCF_014297285.1	d__Bacteria;p__Firmicutes_A;c__Clostridia;o__Oscillospirales;f__Oscillospiraceae;g__Dysosmobacter;s__Dysosmobacter sp001916835	blast	90.2	iPHoP-RF;53.30
RGVC83	RS_GCF_014334055.1	d__Bacteria;p__Firmicutes_A;c__Clostridia;o__Oscillospirales;f__Oscillospiraceae;g__NSJ-62;s__NSJ-62 sp014334055	blast	91.7	None
RGVC84	RS_GCF_000180035.1	d__Bacteria;p__Firmicutes;c__Bacilli;o__Lactobacillales;f__Streptococcaceae;g__Streptococcus;s__Streptococcus parasanguinis_C	blast	92.9	None
RGVC84	RS_GCF_900167375.1	d__Bacteria;p__Firmicutes;c__Bacilli;o__Erysipelotrichales;f__Erysipelotrichaceae;g__Anaerorhabdus;s__Anaerorhabdus furcosa	blast	91.7	None
RGVC85	3300012889_33	d__Bacteria;p__Firmicutes_A;c__Clostridia;o__Oscillospirales;f__Oscillospiraceae;g__CAG-170;s__	blast	92	None
RGVC85	GB_GCA_000432135.1	d__Bacteria;p__Firmicutes_A;c__Clostridia;o__Oscillospirales;f__Oscillospiraceae;g__CAG-170;s__CAG-170 sp000432135	blast	92.1	None
RGVC85	GB_GCA_000436735.1	d__Bacteria;p__Firmicutes_A;c__Clostridia;o__Oscillospirales;f__Oscillospiraceae;g__CAG-170;s__CAG-170 sp000436735	blast	92.9	None
RGVC85	GB_GCA_002298695.1	d__Bacteria;p__Firmicutes_A;c__Clostridia;o__Oscillospirales;f__Oscillospiraceae;g__CAG-170;s__CAG-170 sp002298695	blast	92.1	None
RGVC85	GB_GCA_002404795.1	d__Bacteria;p__Firmicutes_A;c__Clostridia;o__Oscillospirales;f__Oscillospiraceae;g__CAG-170;s__CAG-170 sp002404795	blast	92.1	None
RGVC85	GB_GCA_002437575.1	d__Bacteria;p__Firmicutes_A;c__Clostridia;o__Oscillospirales;f__Oscillospiraceae;g__CAG-170;s__CAG-170 sp002437575	blast	92.1	None
RGVC85	GB_GCA_003516765.1	d__Bacteria;p__Firmicutes_A;c__Clostridia;o__Oscillospirales;f__Oscillospiraceae;g__CAG-170;s__CAG-170 sp003516765	blast	91.8	None
RGVC85	GB_GCA_004555655.1	d__Bacteria;p__Firmicutes_A;c__Clostridia;o__Oscillospirales;f__Oscillospiraceae;g__CAG-170;s__CAG-170 sp004555655	blast	92.1	None
RGVC85	GB_GCA_900545925.1	d__Bacteria;p__Firmicutes_A;c__Clostridia;o__Oscillospirales;f__Oscillospiraceae;g__CAG-170;s__CAG-170 sp900545925	blast	92.1	None
RGVC85	GB_GCA_900553545.1	d__Bacteria;p__Firmicutes_A;c__Clostridia;o__Oscillospirales;f__Oscillospiraceae;g__CAG-170;s__CAG-170 sp900553545	blast	92.1	None
RGVC85	GB_GCA_900555665.1	d__Bacteria;p__Firmicutes_A;c__Clostridia;o__Oscillospirales;f__Oscillospiraceae;g__CAG-170;s__CAG-170 sp900555665	blast	92.1	None
RGVC85	GB_GCA_900556635.1	d__Bacteria;p__Firmicutes_A;c__Clostridia;o__Oscillospirales;f__Oscillospiraceae;g__CAG-170;s__CAG-170 sp900556635	blast	92.1	None
RGVC87	GB_GCA_000432135.1	d__Bacteria;p__Firmicutes_A;c__Clostridia;o__Oscillospirales;f__Oscillospiraceae;g__CAG-170;s__CAG-170 sp000432135	blast	96.9	iPHoP-RF;90.50
RGVC87	GB_GCA_002404795.1	d__Bacteria;p__Firmicutes_A;c__Clostridia;o__Oscillospirales;f__Oscillospiraceae;g__CAG-170;s__CAG-170 sp002404795	blast	96.9	iPHoP-RF;90.10
RGVC87	GB_GCA_900545925.1	d__Bacteria;p__Firmicutes_A;c__Clostridia;o__Oscillospirales;f__Oscillospiraceae;g__CAG-170;s__CAG-170 sp900545925	blast	90.1	iPHoP-RF;81.60
RGVC87	GB_GCA_900556635.1	d__Bacteria;p__Firmicutes_A;c__Clostridia;o__Oscillospirales;f__Oscillospiraceae;g__CAG-170;s__CAG-170 sp900556635	blast	96.9	iPHoP-RF;89.20
RGVC88	RS_GCF_000026325.1	d__Bacteria;p__Proteobacteria;c__Gammaproteobacteria;o__Enterobacterales;f__Enterobacteriaceae;g__Escherichia;s__Escherichia coli_D	blast	96.8	iPHoP-RF;84.50
RGVC88	RS_GCF_000208585.1	d__Bacteria;p__Proteobacteria;c__Gammaproteobacteria;o__Enterobacterales;f__Enterobacteriaceae;g__Escherichia;s__Escherichia sp000208585	blast	96.8	iPHoP-RF;80.30
RGVC88	RS_GCF_001660175.1	d__Bacteria;p__Proteobacteria;c__Gammaproteobacteria;o__Enterobacterales;f__Enterobacteriaceae;g__Escherichia;s__Escherichia sp001660175	blast	96.8	iPHoP-RF;81.90
RGVC88	RS_GCF_002900365.1	d__Bacteria;p__Proteobacteria;c__Gammaproteobacteria;o__Enterobacterales;f__Enterobacteriaceae;g__Escherichia;s__Escherichia marmotae	blast	96.8	iPHoP-RF;85.10
RGVC88	RS_GCF_002949675.1	d__Bacteria;p__Proteobacteria;c__Gammaproteobacteria;o__Enterobacterales;f__Enterobacteriaceae;g__Escherichia;s__Escherichia dysenteriae	blast	96.8	iPHoP-RF;83.30
RGVC88	RS_GCF_002950215.1	d__Bacteria;p__Proteobacteria;c__Gammaproteobacteria;o__Enterobacterales;f__Enterobacteriaceae;g__Escherichia;s__Escherichia flexneri	blast	96.8	iPHoP-RF;86.30
RGVC88	RS_GCF_002965065.1	d__Bacteria;p__Proteobacteria;c__Gammaproteobacteria;o__Enterobacterales;f__Enterobacteriaceae;g__Escherichia;s__Escherichia sp002965065	blast	96.8	iPHoP-RF;85.10
RGVC88	RS_GCF_003697165.2	d__Bacteria;p__Proteobacteria;c__Gammaproteobacteria;o__Enterobacterales;f__Enterobacteriaceae;g__Escherichia;s__Escherichia coli	blast	96.9	iPHoP-RF;86.70
RGVC88	RS_GCF_004211955.1	d__Bacteria;p__Proteobacteria;c__Gammaproteobacteria;o__Enterobacterales;f__Enterobacteriaceae;g__Escherichia;s__Escherichia sp004211955	blast	96.8	iPHoP-RF;85.70
RGVC89	GB_GCA_900553855.1	d__Bacteria;p__Firmicutes;c__Bacilli;o__RF39;f__UBA660;g__CAG-533;s__CAG-533 sp900553855	blast	93.6	iPHoP-RF;67.00
RGVC90	3300000839_59	d__Bacteria;p__Firmicutes_A;c__Clostridia;o__TANB77;f__CAG-508;g__CAG-269;s__	blast	93	None
RGVC90	3300010278_16	d__Bacteria;p__Firmicutes_A;c__Clostridia;o__TANB77;f__CAG-508;g__CAG-269;s__	blast	90.4	None
RGVC90	GB_GCA_000431335.1	d__Bacteria;p__Firmicutes_A;c__Clostridia;o__TANB77;f__CAG-508;g__CAG-269;s__CAG-269 sp000431335	blast	91.8	None
RGVC90	GB_GCA_000435535.1	d__Bacteria;p__Firmicutes_A;c__Clostridia;o__TANB77;f__CAG-508;g__CAG-269;s__CAG-269 sp000435535	blast	90.3	None
RGVC90	GB_GCA_000437215.1	d__Bacteria;p__Firmicutes_A;c__Clostridia;o__TANB77;f__CAG-508;g__CAG-269;s__CAG-269 sp000437215	blast	90.4	None
RGVC90	GB_GCA_000438255.1	d__Bacteria;p__Firmicutes_A;c__Clostridia;o__TANB77;f__CAG-508;g__CAG-269;s__CAG-269 sp000438255	blast	91.7	None
RGVC90	GB_GCA_001916005.1	d__Bacteria;p__Firmicutes_A;c__Clostridia;o__TANB77;f__CAG-508;g__CAG-269;s__CAG-269 sp001916005	blast	90.9	None
RGVC90	GB_GCA_001916035.1	d__Bacteria;p__Firmicutes_A;c__Clostridia;o__TANB77;f__CAG-508;g__CAG-269;s__CAG-269 sp001916035	blast	90.9	None
RGVC90	GB_GCA_001916055.1	d__Bacteria;p__Firmicutes_A;c__Clostridia;o__TANB77;f__CAG-508;g__CAG-269;s__CAG-269 sp001916055	blast	90.4	None
RGVC90	GB_GCA_001916065.1	d__Bacteria;p__Firmicutes_A;c__Clostridia;o__TANB77;f__CAG-508;g__CAG-269;s__CAG-269 sp001916065	blast	91.7	None
RGVC90	GB_GCA_900551615.1	d__Bacteria;p__Firmicutes_A;c__Clostridia;o__TANB77;f__CAG-508;g__CAG-269;s__CAG-269 sp900551615	blast	91.7	None
RGVC90	GB_GCA_900552555.1	d__Bacteria;p__Firmicutes_A;c__Clostridia;o__TANB77;f__CAG-508;g__CAG-269;s__CAG-269 sp900552555	blast	91.7	None
RGVC90	GB_GCA_900554365.1	d__Bacteria;p__Firmicutes_A;c__Clostridia;o__TANB77;f__CAG-508;g__CAG-269;s__CAG-269 sp900554365	blast	90.4	None
RGVC90	GB_GCA_900557115.1	d__Bacteria;p__Firmicutes_A;c__Clostridia;o__TANB77;f__CAG-508;g__CAG-269;s__CAG-269 sp900557115	blast	90.2	None
RGVC90	GB_GCA_902760765.1	d__Bacteria;p__Firmicutes_A;c__Clostridia;o__TANB77;f__CAG-508;g__CAG-269;s__CAG-269 sp902760765	blast	90.3	None
RGVC90	RS_GCF_900753165.1	d__Bacteria;p__Firmicutes_A;c__Clostridia;o__TANB77;f__CAG-508;g__CAG-269;s__CAG-269 sp900753165	blast	91.7	None
RGVC90	RS_GCF_900754285.1	d__Bacteria;p__Firmicutes_A;c__Clostridia;o__TANB77;f__CAG-508;g__CAG-269;s__CAG-269 sp900754285	blast	90.9	None
RGVC90	RS_GCF_900760175.1	d__Bacteria;p__Firmicutes_A;c__Clostridia;o__TANB77;f__CAG-508;g__CAG-269;s__CAG-269 sp900760175	blast	90.4	None
RGVC90	RS_GCF_900762425.1	d__Bacteria;p__Firmicutes_A;c__Clostridia;o__TANB77;f__CAG-508;g__CAG-269;s__CAG-269 sp900762425	blast	91.9	None
RGVC92	3300022660_114	d__Bacteria;p__Firmicutes_A;c__Clostridia;o__Oscillospirales;f__Acutalibacteraceae;g__DTU089;s__	blast	92.8	None
RGVC92	3300022753_94	d__Bacteria;p__Firmicutes_A;c__Clostridia;o__Oscillospirales;f__Acutalibacteraceae;g__DTU089;s__	blast	92.8	iPHoP-RF;55.70
RGVC93	RS_GCF_900769555.1	d__Bacteria;p__Bacteroidota;c__Bacteroidia;o__Bacteroidales;f__Paludibacteraceae;g__UBA1181;s__UBA1181 sp900769555	blast	91.6	iPHoP-RF;72.20
RGVC94	RS_GCF_001487165.1	d__Bacteria;p__Firmicutes_A;c__Clostridia;o__Lachnospirales;f__Lachnospiraceae;g__Blautia_A;s__Blautia_A massiliensis	blast	93.9	iPHoP-RF;85.40
RGVC94	RS_GCF_902362865.1	d__Bacteria;p__Firmicutes_A;c__Clostridia;o__Lachnospirales;f__Lachnospiraceae;g__Lachnoclostridium_B;s__Lachnoclostridium_B sp900066765	blast	90.5	iPHoP-RF;51.70
RGVC96	GB_GCA_000431795.1	d__Bacteria;p__Firmicutes;c__Bacilli;o__RF39;f__UBA660;g__CAG-302;s__CAG-302 sp000431795	blast	96.2	None
RGVC96	GB_GCA_001916775.1	d__Bacteria;p__Firmicutes;c__Bacilli;o__RF39;f__UBA660;g__CAG-302;s__CAG-302 sp001916775	blast	96.5	None
RGVC96	GB_GCA_002375205.1	d__Bacteria;p__Firmicutes;c__Bacilli;o__RF39;f__UBA660;g__CAG-302;s__CAG-302 sp002375205	blast	91.9	None
RGVC96	GB_GCA_900543825.1	d__Bacteria;p__Firmicutes;c__Bacilli;o__RF39;f__UBA660;g__CAG-302;s__CAG-302 sp900543825	blast	91.4	None
RGVC96	GB_GCA_900549325.1	d__Bacteria;p__Firmicutes;c__Bacilli;o__RF39;f__UBA660;g__CAG-302;s__CAG-302 sp900549325	blast	91.9	None
RGVC96	GB_GCA_900554615.1	d__Bacteria;p__Firmicutes;c__Bacilli;o__RF39;f__UBA660;g__CAG-302;s__CAG-302 sp900554615	blast	90.1	None
RGVC98	3300029122_23	d__Bacteria;p__Firmicutes_A;c__Clostridia;o__Oscillospirales;f__Oscillospiraceae;g__CAG-83;s__	blast	96.9	iPHoP-RF;92.80
RGVC98	3300029127_29	d__Bacteria;p__Firmicutes_A;c__Clostridia;o__Oscillospirales;f__Oscillospiraceae;g__CAG-83;s__	blast	96.8	iPHoP-RF;91.10
RGVC98	GB_GCA_000435555.1	d__Bacteria;p__Firmicutes_A;c__Clostridia;o__Oscillospirales;f__Oscillospiraceae;g__CAG-83;s__CAG-83 sp000435555	blast	96.9	iPHoP-RF;91.10
RGVC98	GB_GCA_900545495.1	d__Bacteria;p__Firmicutes_A;c__Clostridia;o__Oscillospirales;f__Oscillospiraceae;g__CAG-83;s__CAG-83 sp900545495	blast	96.9	iPHoP-RF;93.40
RGVC98	GB_GCA_900545585.1	d__Bacteria;p__Firmicutes_A;c__Clostridia;o__Oscillospirales;f__Oscillospiraceae;g__CAG-83;s__CAG-83 sp900545585	blast	96.9	iPHoP-RF;92.10
RGVC98	GB_GCA_900547745.1	d__Bacteria;p__Firmicutes_A;c__Clostridia;o__Oscillospirales;f__Oscillospiraceae;g__CAG-83;s__CAG-83 sp900547745	blast	96.9	iPHoP-RF;92.10
RGVC98	GB_GCA_900550585.1	d__Bacteria;p__Firmicutes_A;c__Clostridia;o__Oscillospirales;f__Oscillospiraceae;g__CAG-83;s__CAG-83 sp900550585	blast	96.8	iPHoP-RF;92.80
RGVC98	GB_GCA_900551355.1	d__Bacteria;p__Firmicutes_A;c__Clostridia;o__Oscillospirales;f__Oscillospiraceae;g__CAG-83;s__CAG-83 sp900551355	iPHoP-RF	93.7	None
RGVC100	GB_GCA_014337175.1	d__Bacteria;p__Firmicutes_A;c__Clostridia;o__Lachnospirales;f__Lachnospiraceae;g__Acetatifactor;s__Acetatifactor sp900066365	blast	96.9	iPHoP-RF;84.50
RGVC100	RS_GCF_003584705.1	d__Bacteria;p__Firmicutes_A;c__Clostridia;o__Lachnospirales;f__Lachnospiraceae;g__Acetatifactor;s__Acetatifactor sp900066565	blast	96.9	iPHoP-RF;80.30
RGVC102	3300022660_152	d__Bacteria;p__Firmicutes_A;c__Clostridia;o__Oscillospirales;f__Acutalibacteraceae;g__UBA5905;s__	blast	90.3	None
RGVC104	GB_GCA_902373635.1	d__Bacteria;p__Firmicutes_A;c__Clostridia;o__Oscillospirales;f__Oscillospiraceae;g__UMGS1872;s__UMGS1872 sp902373635	blast	92.7	None
RGVC104	RS_GCF_000239295.1	d__Bacteria;p__Firmicutes_A;c__Clostridia;o__Oscillospirales;f__Oscillospiraceae;g__Flavonifractor;s__Flavonifractor plautii	blast	92.1	iPHoP-RF;56.00
RGVC104	RS_GCF_000508885.1	d__Bacteria;p__Firmicutes_A;c__Clostridia;o__Oscillospirales;f__Oscillospiraceae;g__Flavonifractor;s__Flavonifractor sp000508885	blast	91.9	iPHoP-RF;56.50
RGVC104	RS_GCF_002161215.1	d__Bacteria;p__Firmicutes_A;c__Clostridia;o__Oscillospirales;f__Oscillospiraceae;g__Flavonifractor;s__Flavonifractor sp002161215	blast	92.6	iPHoP-RF;63.80
RGVC105	3300010270_10	d__Bacteria;p__Verrucomicrobiota;c__Kiritimatiellae;o__RFP12;f__UBA1067;g__UBA1067;s__	blast	92.1	None
RGVC105	GB_GCA_902799385.1	d__Bacteria;p__Verrucomicrobiota;c__Kiritimatiellae;o__RFP12;f__UBA1067;g__UBA1067;s__UBA1067 sp902799385	blast	91.1	iPHoP-RF;54.90
RGVC106	GB_GCA_014384805.1	d__Bacteria;p__Firmicutes_A;c__Clostridia_A;o__Christensenellales;f__Christensenellaceae;g__NSJ-63;s__NSJ-63 sp014384805	blast	92.7	iPHoP-RF;50.90
RGVC107	GB_GCA_000433455.1	d__Bacteria;p__Firmicutes;c__Bacilli;o__RF39;f__UBA660;g__CAG-877;s__CAG-877 sp000433455	blast	92.5	None
RGVC112	GB_GCA_008681155.1	d__Bacteria;p__Firmicutes_A;c__Clostridia;o__Oscillospirales;f__Acutalibacteraceae;g__UBA1417;s__UBA1417 sp003531055	blast	96.9	iPHoP-RF;65.80
RGVC113	GB_GCA_002491065.1	d__Bacteria;p__Firmicutes_B;c__Peptococcia;o__Peptococcales;f__Peptococcaceae;g__UBA7185;s__UBA7185 sp002491065	blast	90.9	None
RGVC113	RS_GCF_900756555.1	d__Bacteria;p__Firmicutes_B;c__Peptococcia;o__Peptococcales;f__Peptococcaceae;g__UBA7185;s__UBA7185 sp900756555	blast	96.5	iPHoP-RF;65.30
RGVC115	RS_GCF_900104635.1	d__Bacteria;p__Firmicutes_A;c__Clostridia;o__Lachnospirales;f__Lachnospiraceae;g__Faecalimonas;s__Faecalimonas phoceensis	blast	92.3	None
RGVC116	3300012979_12	d__Bacteria;p__Bacteroidota;c__Bacteroidia;o__Bacteroidales;f__UBA932;g__RC9;s__	blast	96.4	iPHoP-RF;51.50
RGVC116	GB_GCA_002439805.1	d__Bacteria;p__Bacteroidota;c__Bacteroidia;o__Bacteroidales;f__UBA932;g__RC9;s__RC9 sp002439805	blast	93.8	iPHoP-RF;60.10
RGVC116	GB_GCA_004554455.1	d__Bacteria;p__Bacteroidota;c__Bacteroidia;o__Bacteroidales;f__UBA932;g__RC9;s__RC9 sp004554455	blast	92	None
RGVC116	GB_GCA_009774765.1	d__Bacteria;p__Bacteroidota;c__Bacteroidia;o__Bacteroidales;f__UBA932;g__RC9;s__RC9 sp009774765	blast	91.8	iPHoP-RF;57.30
RGVC116	GB_GCA_900545245.1	d__Bacteria;p__Bacteroidota;c__Bacteroidia;o__Bacteroidales;f__UBA932;g__RC9;s__RC9 sp900545245	blast	91.8	iPHoP-RF;51.70
RGVC116	GB_GCA_900546395.1	d__Bacteria;p__Bacteroidota;c__Bacteroidia;o__Bacteroidales;f__UBA932;g__RC9;s__RC9 sp900546395	blast	91.8	None
RGVC116	RS_GCF_900760425.1	d__Bacteria;p__Bacteroidota;c__Bacteroidia;o__Bacteroidales;f__UBA932;g__RC9;s__RC9 sp900760425	blast	91.8	None
RGVC116	GB_GCA_002298075.1	d__Bacteria;p__Bacteroidota;c__Bacteroidia;o__Bacteroidales;f__UBA932;g__RC9;s__RC9 sp002298075	blast	91.5	None
RGVC117	GB_GCA_000435555.1	d__Bacteria;p__Firmicutes_A;c__Clostridia;o__Oscillospirales;f__Oscillospiraceae;g__CAG-83;s__CAG-83 sp000435555	blast	90.6	iPHoP-RF;63.30
RGVC117	GB_GCA_900317525.1	d__Bacteria;p__Firmicutes_A;c__Clostridia;o__Oscillospirales;f__Oscillospiraceae;g__ER4;s__ER4 sp900317525	blast	92.1	iPHoP-RF;57.30
RGVC117	RS_GCF_000765235.1	d__Bacteria;p__Firmicutes_A;c__Clostridia;o__Oscillospirales;f__Oscillospiraceae;g__ER4;s__ER4 sp000765235	blast	93.6	iPHoP-RF;65.30
RGVC118	GB_GCA_900552235.1	d__Bacteria;p__Firmicutes;c__Bacilli;o__RF39;f__UBA660;g__CAG-611;s__CAG-611 sp900552235	blast	93.9	None
RGVC121	RS_GCF_900769975.1	d__Bacteria;p__Spirochaetota;c__Spirochaetia;o__Treponematales;f__Treponemataceae;g__Treponema_D;s__Treponema_D sp900769975	blast	94.2	iPHoP-RF;70.20
RGVC122	3300018430_47	d__Bacteria;p__Firmicutes_A;c__Clostridia;o__Lachnospirales;f__Lachnospiraceae;g__;s__	blast	91.7	iPHoP-RF;53.00
RGVC123	3300025692_5	d__Bacteria;p__Bacteroidota;c__Bacteroidia;o__Bacteroidales;f__VadinHA17;g__LD21;s__	iPHoP-RF	91.1	None
RGVC123	3300025692_6	d__Bacteria;p__Bacteroidota;c__Bacteroidia;o__Bacteroidales;f__VadinHA17;g__LD21;s__	iPHoP-RF	90.8	None
RGVC123	GB_GCA_003141525.1	d__Bacteria;p__Bacteroidota;c__Bacteroidia;o__Bacteroidales;f__VadinHA17;g__LD21;s__LD21 sp003141525	iPHoP-RF	90.1	None
RGVC127	GB_GCA_900545865.1	d__Bacteria;p__Firmicutes_A;c__Clostridia;o__Monoglobales;f__Monoglobaceae;g__UMGS1820;s__UMGS1820 sp900545865	blast	90.4	None
RGVC127	GB_GCA_900554105.1	d__Bacteria;p__Firmicutes_A;c__Clostridia;o__Monoglobales;f__Monoglobaceae;g__Monoglobus;s__Monoglobus sp900554105	blast	90.3	None
RGVC127	GB_GCA_902760955.1	d__Bacteria;p__Firmicutes_A;c__Clostridia;o__Monoglobales;f__Monoglobaceae;g__UMGS1820;s__UMGS1820 sp902760955	blast	91.1	None
RGVC127	GB_GCA_902766745.1	d__Bacteria;p__Firmicutes_A;c__Clostridia;o__Monoglobales;f__Monoglobaceae;g__UMGS1820;s__UMGS1820 sp902766745	blast	93.4	None
RGVC127	GB_GCA_902791425.1	d__Bacteria;p__Firmicutes_A;c__Clostridia;o__Monoglobales;f__Monoglobaceae;g__UMGS1820;s__UMGS1820 sp902791425	blast	95.5	None
RGVC128	RS_GCF_003573975.1	d__Bacteria;p__Firmicutes_A;c__Clostridia;o__Oscillospirales;f__Oscillospiraceae;g__Lawsonibacter;s__Lawsonibacter sp900066825	blast	90.1	None
RGVC130	RS_GCF_000492175.1	d__Bacteria;p__Firmicutes_A;c__Clostridia;o__Oscillospirales;f__Oscillospiraceae;g__Lawsonibacter;s__Lawsonibacter sp000492175	blast	91.5	None
RGVC130	RS_GCF_900626285.1	d__Bacteria;p__Firmicutes_A;c__Clostridia;o__Oscillospirales;f__Oscillospiraceae;g__Flavonifractor;s__Flavonifractor massiliensis_A	blast	91.8	None
RGVC132	3300022661_102	d__Bacteria;p__Firmicutes_A;c__Clostridia;o__Oscillospirales;f__Butyricicoccaceae;g__;s__	blast	91.9	None
RGVC132	GB_GCA_002338885.1	d__Bacteria;p__Firmicutes_A;c__Clostridia;o__Oscillospirales;f__Ruminococcaceae;g__UBA1409;s__UBA1409 sp002338885	blast	90.2	iPHoP-RF;68.40
RGVC133	GB_GCA_000434635.1	d__Bacteria;p__Firmicutes_A;c__Clostridia;o__Oscillospirales;f__Oscillospiraceae;g__CAG-110;s__CAG-110 sp000434635	blast	96.9	iPHoP-RF;74.10
RGVC133	GB_GCA_900540635.1	d__Bacteria;p__Firmicutes_A;c__Clostridia;o__Oscillospirales;f__Oscillospiraceae;g__CAG-110;s__CAG-110 sp900540635	blast	92.1	None
RGVC133	3300010259_5	d__Bacteria;p__Firmicutes_A;c__Clostridia;o__Oscillospirales;f__Oscillospiraceae;g__CAG-110;s__	blast	92	None
RGVC133	3300022660_140	d__Bacteria;p__Firmicutes_A;c__Clostridia;o__Oscillospirales;f__Oscillospiraceae;g__CAG-110;s__	blast	92	None
RGVC134	GB_GCA_900540455.1	d__Bacteria;p__Firmicutes_A;c__Clostridia;o__Oscillospirales;f__Ruminococcaceae;g__Faecalibacterium;s__Faecalibacterium sp900540455	blast	90	None
RGVC134	RS_GCF_002160895.1	d__Bacteria;p__Firmicutes_A;c__Clostridia;o__Oscillospirales;f__Ruminococcaceae;g__Faecalibacterium;s__Faecalibacterium sp002160895	blast	92.7	None
RGVC139	GB_GCA_900542005.1	d__Bacteria;p__Firmicutes_A;c__Clostridia_A;o__Christensenellales;f__UMGS416;g__UMGS416;s__UMGS416 sp900542005	blast	92	None
RGVC140	3300027276_20	d__Bacteria;p__Firmicutes_A;c__Clostridia_A;o__Christensenellales;f__CAG-74;g__SFMI01;s__	blast	91.7	None
RGVC143	GB_GCA_003150275.1	d__Bacteria;p__Desulfobacterota;c__Desulfovibrionia;o__Desulfovibrionales;f__Desulfovibrionaceae;g__Mailhella;s__Mailhella sp003150275	blast	91	None
RGVC143	GB_GCA_902783285.1	d__Bacteria;p__Desulfobacterota;c__Desulfovibrionia;o__Desulfovibrionales;f__Desulfovibrionaceae;g__Mailhella;s__Mailhella sp902783285	blast	91.8	None
RGVC143	RS_GCF_900155525.1	d__Bacteria;p__Desulfobacterota;c__Desulfovibrionia;o__Desulfovibrionales;f__Desulfovibrionaceae;g__Mailhella;s__Mailhella massiliensis	blast	92.2	None
RGVC145	3300027276_17	d__Bacteria;p__Firmicutes_A;c__Clostridia_A;o__Christensenellales;f__CAG-74;g__Firm-10;s__	blast	93.7	None
RGVC148	GB_GCA_003488415.1	d__Bacteria;p__Firmicutes_A;c__Clostridia;o__Oscillospirales;f__Ruminococcaceae;g__Ruminococcus;s__Ruminococcus sp003488415	blast	91.7	None
RGVC148	RS_GCF_900769775.1	d__Bacteria;p__Firmicutes_A;c__Clostridia;o__Oscillospirales;f__Acutalibacteraceae;g__SFWF01;s__SFWF01 sp900769775	blast	91.8	None
RGVC149	RS_GCF_900754145.1	d__Bacteria;p__Firmicutes_A;c__Clostridia;o__Oscillospirales;f__Acutalibacteraceae;g__UBA737;s__UBA737 sp900754145	blast	94.4	iPHoP-RF;61.70
RGVC152	3300022661_128	d__Bacteria;p__Firmicutes_A;c__Clostridia;o__Oscillospirales;f__CAG-272;g__;s__	blast	96.6	None
RGVC155	GB_GCA_000210015.1	d__Bacteria;p__Firmicutes_A;c__Clostridia;o__Lachnospirales;f__Lachnospiraceae;g__Blautia_A;s__Blautia_A obeum_B	blast	91.7	None
RGVC157	GB_GCA_004563405.1	d__Bacteria;p__Firmicutes_A;c__Clostridia_A;o__Christensenellales;f__CAG-74;g__SFTH01;s__SFTH01 sp004563405	blast	90.7	None
RGVC158	RS_GCF_000156715.1	d__Bacteria;p__Proteobacteria;c__Gammaproteobacteria;o__Francisellales;f__Francisellaceae;g__Francisella;s__Francisella philomiragia	iPHoP-RF	92.8	None
RGVC158	RS_GCF_000764555.1	d__Bacteria;p__Proteobacteria;c__Gammaproteobacteria;o__Francisellales;f__Francisellaceae;g__Francisella;s__Francisella sp000764555	iPHoP-RF	90.1	None
RGVC158	RS_GCF_001042525.2	d__Bacteria;p__Proteobacteria;c__Gammaproteobacteria;o__Francisellales;f__Francisellaceae;g__Francisella;s__Francisella orientalis	iPHoP-RF	93.1	None
RGVC158	RS_GCF_001885235.1	d__Bacteria;p__Proteobacteria;c__Gammaproteobacteria;o__Francisellales;f__Francisellaceae;g__Francisella;s__Francisella hispaniensis	iPHoP-RF	92.1	None
RGVC158	RS_GCF_001895265.1	d__Bacteria;p__Proteobacteria;c__Gammaproteobacteria;o__Francisellales;f__Francisellaceae;g__Francisella;s__Francisella uliginis	iPHoP-RF	90.8	None
RGVC158	RS_GCF_002211785.1	d__Bacteria;p__Proteobacteria;c__Gammaproteobacteria;o__Francisellales;f__Francisellaceae;g__Francisella;s__Francisella halioticida	iPHoP-RF	90.5	None
RGVC160	GB_GCA_000432135.1	d__Bacteria;p__Firmicutes_A;c__Clostridia;o__Oscillospirales;f__Oscillospiraceae;g__CAG-170;s__CAG-170 sp000432135	blast	96.9	iPHoP-RF;80.30
RGVC160	GB_GCA_002404795.1	d__Bacteria;p__Firmicutes_A;c__Clostridia;o__Oscillospirales;f__Oscillospiraceae;g__CAG-170;s__CAG-170 sp002404795	blast	96.9	iPHoP-RF;83.90
RGVC160	GB_GCA_900545925.1	d__Bacteria;p__Firmicutes_A;c__Clostridia;o__Oscillospirales;f__Oscillospiraceae;g__CAG-170;s__CAG-170 sp900545925	blast	90.6	iPHoP-RF;73.90
RGVC160	GB_GCA_900556635.1	d__Bacteria;p__Firmicutes_A;c__Clostridia;o__Oscillospirales;f__Oscillospiraceae;g__CAG-170;s__CAG-170 sp900556635	blast	96.9	iPHoP-RF;75.20
RGVC160	GB_GCA_900751035.1	d__Bacteria;p__Firmicutes_A;c__Clostridia;o__Oscillospirales;f__Oscillospiraceae;g__CAG-170;s__CAG-170 sp900751035	blast	90.6	iPHoP-RF;61.40
RGVC162	3300022660_140	d__Bacteria;p__Firmicutes_A;c__Clostridia;o__Oscillospirales;f__Oscillospiraceae;g__CAG-110;s__	blast	90.3	iPHoP-RF;65.30
RGVC162	GB_GCA_002437585.1	d__Bacteria;p__Firmicutes_A;c__Clostridia;o__Oscillospirales;f__Oscillospiraceae;g__CAG-110;s__CAG-110 sp002437585	blast	90.3	iPHoP-RF;73.90
RGVC162	GB_GCA_002493965.1	d__Bacteria;p__Firmicutes_A;c__Clostridia;o__Oscillospirales;f__Oscillospiraceae;g__CAG-110;s__CAG-110 sp002493965	blast	90.2	iPHoP-RF;70.20
RGVC162	GB_GCA_004555705.1	d__Bacteria;p__Firmicutes_A;c__Clostridia;o__Oscillospirales;f__Oscillospiraceae;g__CAG-110;s__CAG-110 sp004555705	blast	90.2	iPHoP-RF;68.60
RGVC162	GB_GCA_900544405.1	d__Bacteria;p__Firmicutes_A;c__Clostridia;o__Oscillospirales;f__Oscillospiraceae;g__CAG-110;s__CAG-110 sp900544405	blast	91.8	iPHoP-RF;57.30
RGVC162	GB_GCA_900544945.1	d__Bacteria;p__Firmicutes_A;c__Clostridia;o__Oscillospirales;f__Oscillospiraceae;g__CAG-110;s__CAG-110 sp900544945	blast	91.7	iPHoP-RF;75.70
RGVC162	GB_GCA_900546075.1	d__Bacteria;p__Firmicutes_A;c__Clostridia;o__Oscillospirales;f__Oscillospiraceae;g__CAG-110;s__CAG-110 sp900546075	blast	92	iPHoP-RF;77.50
RGVC162	GB_GCA_900549495.1	d__Bacteria;p__Firmicutes_A;c__Clostridia;o__Oscillospirales;f__Oscillospiraceae;g__CAG-110;s__CAG-110 sp900549495	blast	90.2	iPHoP-RF;67.70
RGVC162	GB_GCA_900549705.1	d__Bacteria;p__Firmicutes_A;c__Clostridia;o__Oscillospirales;f__Oscillospiraceae;g__CAG-110;s__CAG-110 sp900549705	blast	90.3	iPHoP-RF;68.90
RGVC162	GB_GCA_900752285.1	d__Bacteria;p__Firmicutes_A;c__Clostridia;o__Oscillospirales;f__Oscillospiraceae;g__CAG-110;s__CAG-110 sp900752285	blast	90.2	iPHoP-RF;67.70
RGVC162	GB_GCA_900763965.1	d__Bacteria;p__Firmicutes_A;c__Clostridia;o__Oscillospirales;f__Oscillospiraceae;g__CAG-110;s__CAG-110 sp900763965	blast	90.2	None
RGVC164	GB_GCA_000434635.1	d__Bacteria;p__Firmicutes_A;c__Clostridia;o__Oscillospirales;f__Oscillospiraceae;g__CAG-110;s__CAG-110 sp000434635	blast	93.8	iPHoP-RF;77.80 CRISPR;50.00
RGVC165	GB_GCA_900540045.1	d__Bacteria;p__Firmicutes_A;c__Clostridia_A;o__Christensenellales;f__CAG-74;g__Firm-11;s__Firm-11 sp900540045	blast	96.9	iPHoP-RF;64.30
RGVC165	GB_GCA_900550955.1	d__Bacteria;p__Firmicutes_A;c__Clostridia_A;o__Christensenellales;f__CAG-74;g__Firm-11;s__Firm-11 sp900550955	blast	91.5	None
RGVC165	3300019376_18	d__Bacteria;p__Firmicutes_A;c__Clostridia_A;o__Christensenellales;f__CAG-74;g__Firm-11;s__	blast	91	None
RGVC165	3300022660_71	d__Bacteria;p__Firmicutes_A;c__Clostridia_A;o__Christensenellales;f__CAG-74;g__Firm-11;s__	blast	91	None
RGVC165	GB_GCA_012729115.1	d__Bacteria;p__Firmicutes_A;c__Clostridia_A;o__Christensenellales;f__CAG-74;g__Firm-11;s__Firm-11 sp012729115	blast	91	None
RGVC169	GB_GCA_003538975.1	d__Bacteria;p__Firmicutes_A;c__Clostridia_A;o__Christensenellales;f__Borkfalkiaceae;g__UBA11475;s__UBA11475 sp003538975	blast	90.5	iPHoP-RF;53.80
RGVC171	RS_GCF_003612565.1	d__Bacteria;p__Firmicutes_A;c__Clostridia;o__Lachnospirales;f__Lachnospiraceae;g__1XD42-69;s__1XD42-69 sp003612565	blast	91.3	None
RGVC173	GB_GCA_000437595.1	d__Bacteria;p__Firmicutes_A;c__Clostridia_A;o__Christensenellales;f__CAG-74;g__UBA11524;s__UBA11524 sp000437595	blast	93.2	iPHoP-RF;76.60
RGVC173	GB_GCA_900540045.1	d__Bacteria;p__Firmicutes_A;c__Clostridia_A;o__Christensenellales;f__CAG-74;g__Firm-11;s__Firm-11 sp900540045	blast	93	iPHoP-RF;55.70
RGVC174	3300010280_45	d__Bacteria;p__Firmicutes_A;c__Clostridia;o__Oscillospirales;f__Oscillospiraceae;g__UBA1777;s__	blast	90.1	iPHoP-RF;77.30
RGVC174	3300027276_44	d__Bacteria;p__Firmicutes_A;c__Clostridia;o__Oscillospirales;f__Oscillospiraceae;g__UBA1777;s__	blast	91.4	iPHoP-RF;67.30
RGVC174	3300029587_26	d__Bacteria;p__Firmicutes_A;c__Clostridia;o__Oscillospirales;f__Oscillospiraceae;g__UBA1777;s__	blast	92.1	iPHoP-RF;75.40
RGVC174	GB_GCA_002320035.1	d__Bacteria;p__Firmicutes_A;c__Clostridia;o__Oscillospirales;f__Oscillospiraceae;g__UBA1777;s__UBA1777 sp002320035	blast	92.1	iPHoP-RF;70.40
RGVC174	GB_GCA_002350825.1	d__Bacteria;p__Firmicutes_A;c__Clostridia;o__Oscillospirales;f__Oscillospiraceae;g__UBA1777;s__UBA1777 sp002350825	blast	91.3	iPHoP-RF;62.20
RGVC174	GB_GCA_002431965.1	d__Bacteria;p__Firmicutes_A;c__Clostridia;o__Oscillospirales;f__Oscillospiraceae;g__UBA1777;s__UBA1777 sp002431965	blast	92.1	iPHoP-RF;68.20
RGVC174	GB_GCA_002450075.1	d__Bacteria;p__Firmicutes_A;c__Clostridia;o__Oscillospirales;f__Oscillospiraceae;g__UBA1777;s__UBA1777 sp002450075	blast	91.4	iPHoP-RF;59.80
RGVC174	GB_GCA_003150355.1	d__Bacteria;p__Firmicutes_A;c__Clostridia;o__Oscillospirales;f__Oscillospiraceae;g__UBA1777;s__UBA1777 sp003150355	blast	92.1	iPHoP-RF;64.50
RGVC174	GB_GCA_004560305.1	d__Bacteria;p__Firmicutes_A;c__Clostridia;o__Oscillospirales;f__Oscillospiraceae;g__UBA1777;s__UBA1777 sp004560305	blast	93.5	iPHoP-RF;77.10
RGVC174	GB_GCA_900319465.1	d__Bacteria;p__Firmicutes_A;c__Clostridia;o__Oscillospirales;f__Oscillospiraceae;g__UBA1777;s__UBA1777 sp900319465	blast	91.4	iPHoP-RF;58.70
RGVC174	GB_GCA_900319635.1	d__Bacteria;p__Firmicutes_A;c__Clostridia;o__Oscillospirales;f__Oscillospiraceae;g__UBA1777;s__UBA1777 sp900319635	blast	90.2	iPHoP-RF;78.70
RGVC174	GB_GCA_900319695.1	d__Bacteria;p__Firmicutes_A;c__Clostridia;o__Oscillospirales;f__Oscillospiraceae;g__UBA1777;s__UBA1777 sp900319695	blast	91.9	iPHoP-RF;89.80
RGVC174	GB_GCA_900319835.1	d__Bacteria;p__Firmicutes_A;c__Clostridia;o__Oscillospirales;f__Oscillospiraceae;g__UBA1777;s__UBA1777 sp900319835	blast	91.9	iPHoP-RF;62.20
RGVC174	GB_GCA_900320465.1	d__Bacteria;p__Firmicutes_A;c__Clostridia;o__Oscillospirales;f__Oscillospiraceae;g__UBA1777;s__UBA1777 sp900320465	blast	91.3	None
RGVC174	GB_GCA_900320595.1	d__Bacteria;p__Firmicutes_A;c__Clostridia;o__Oscillospirales;f__Oscillospiraceae;g__UBA1777;s__UBA1777 sp900320595	blast	91.4	iPHoP-RF;57.30
RGVC174	GB_GCA_900321275.1	d__Bacteria;p__Firmicutes_A;c__Clostridia;o__Oscillospirales;f__Oscillospiraceae;g__UBA1777;s__UBA1777 sp900321275	blast	91.7	iPHoP-RF;89.50
RGVC174	GB_GCA_900546515.1	d__Bacteria;p__Firmicutes_A;c__Clostridia;o__Oscillospirales;f__Oscillospiraceae;g__UBA1777;s__UBA1777 sp900546515	blast	92.1	None
RGVC174	GB_GCA_900547315.1	d__Bacteria;p__Firmicutes_A;c__Clostridia;o__Oscillospirales;f__Oscillospiraceae;g__UBA1777;s__UBA1777 sp900547315	blast	93.7	iPHoP-RF;62.20
RGVC174	GB_GCA_900549545.1	d__Bacteria;p__Firmicutes_A;c__Clostridia;o__Oscillospirales;f__Oscillospiraceae;g__UBA1777;s__UBA1777 sp900549545	blast	92.1	iPHoP-RF;71.70
RGVC174	GB_GCA_900549645.1	d__Bacteria;p__Firmicutes_A;c__Clostridia;o__Oscillospirales;f__Oscillospiraceae;g__UBA1777;s__UBA1777 sp900549645	blast	92.4	iPHoP-RF;67.50
RGVC174	GB_GCA_900549865.1	d__Bacteria;p__Firmicutes_A;c__Clostridia;o__Oscillospirales;f__Oscillospiraceae;g__UBA1777;s__UBA1777 sp900549865	blast	92.1	iPHoP-RF;71.70
RGVC174	GB_GCA_900554625.1	d__Bacteria;p__Firmicutes_A;c__Clostridia;o__Oscillospirales;f__Oscillospiraceae;g__CAG-110;s__CAG-110 sp900554625	blast	93.7	None
RGVC174	GB_GCA_900762245.1	d__Bacteria;p__Firmicutes_A;c__Clostridia;o__Oscillospirales;f__Oscillospiraceae;g__CAG-110;s__CAG-110 sp900762245	blast	96.1	iPHoP-RF;56.20
RGVC174	GB_GCA_900763965.1	d__Bacteria;p__Firmicutes_A;c__Clostridia;o__Oscillospirales;f__Oscillospiraceae;g__CAG-110;s__CAG-110 sp900763965	blast	92.6	None
RGVC174	GB_GCA_900769845.1	d__Bacteria;p__Firmicutes_A;c__Clostridia;o__Oscillospirales;f__Oscillospiraceae;g__CAG-110;s__CAG-110 sp900769845	blast	94.8	iPHoP-RF;66.00
RGVC175	GB_GCA_003150275.1	d__Bacteria;p__Desulfobacterota;c__Desulfovibrionia;o__Desulfovibrionales;f__Desulfovibrionaceae;g__Mailhella;s__Mailhella sp003150275	blast	91.3	None
RGVC175	GB_GCA_900553065.1	d__Bacteria;p__Desulfobacterota;c__Desulfovibrionia;o__Desulfovibrionales;f__Desulfovibrionaceae;g__Mailhella;s__Mailhella sp900553065	blast	92.1	None
RGVC175	RS_GCF_900155525.1	d__Bacteria;p__Desulfobacterota;c__Desulfovibrionia;o__Desulfovibrionales;f__Desulfovibrionaceae;g__Mailhella;s__Mailhella massiliensis	blast	91.9	None
RGVC176	GB_GCA_900544615.1	d__Bacteria;p__Firmicutes_A;c__Clostridia;o__Oscillospirales;f__Oscillospiraceae;g__Dysosmobacter;s__Dysosmobacter sp900544615	blast	93.5	iPHoP-RF;65.80
RGVC176	RS_GCF_014297285.1	d__Bacteria;p__Firmicutes_A;c__Clostridia;o__Oscillospirales;f__Oscillospiraceae;g__Dysosmobacter;s__Dysosmobacter sp001916835	blast	90.3	iPHoP-RF;56.80
RGVC178	RS_GCF_002222595.2	d__Bacteria;p__Firmicutes_A;c__Clostridia;o__Lachnospirales;f__Lachnospiraceae;g__Blautia;s__Blautia hansenii	blast	92.6	iPHoP-RF;71.10
RGVC180	RS_GCF_900142525.1	d__Bacteria;p__Bacteroidota;c__Bacteroidia;o__Bacteroidales;f__Bacteroidaceae;g__Prevotella;s__Prevotella ruminicola_A	blast	92	iPHoP-RF;84.80
RGVC182	3300010262_10	d__Bacteria;p__Firmicutes_A;c__Clostridia;o__Oscillospirales;f__Oscillospiraceae;g__Lawsonibacter;s__	blast	91.7	None
RGVC182	3300010279_14	d__Bacteria;p__Firmicutes_A;c__Clostridia;o__Oscillospirales;f__Oscillospiraceae;g__Lawsonibacter;s__	blast	91.7	None
RGVC182	3300010280_31	d__Bacteria;p__Firmicutes_A;c__Clostridia;o__Oscillospirales;f__Oscillospiraceae;g__Lawsonibacter;s__	blast	92.7	None
RGVC182	GB_GCA_900545895.1	d__Bacteria;p__Firmicutes_A;c__Clostridia;o__Oscillospirales;f__Oscillospiraceae;g__Lawsonibacter;s__Lawsonibacter sp900545895	blast	92.1	iPHoP-RF;64.50
RGVC182	GB_GCA_900549405.1	d__Bacteria;p__Firmicutes_A;c__Clostridia;o__Oscillospirales;f__Oscillospiraceae;g__Lawsonibacter;s__Lawsonibacter sp900549405	blast	91.7	None
RGVC182	GB_GCA_900550705.1	d__Bacteria;p__Firmicutes_A;c__Clostridia;o__Oscillospirales;f__Oscillospiraceae;g__Lawsonibacter;s__Lawsonibacter sp900550705	blast	91.7	None
RGVC182	GB_GCA_900553135.1	d__Bacteria;p__Firmicutes_A;c__Clostridia;o__Oscillospirales;f__Oscillospiraceae;g__Lawsonibacter;s__Lawsonibacter sp900553135	blast	91.5	None
RGVC182	GB_GCA_900754605.1	d__Bacteria;p__Firmicutes_A;c__Clostridia;o__Oscillospirales;f__Oscillospiraceae;g__Lawsonibacter;s__Lawsonibacter sp900754605	blast	90.8	None
RGVC182	GB_GCA_900763995.1	d__Bacteria;p__Firmicutes_A;c__Clostridia;o__Oscillospirales;f__Oscillospiraceae;g__Lawsonibacter;s__Lawsonibacter sp900763995	blast	91.7	None
RGVC182	GB_GCA_900764755.1	d__Bacteria;p__Firmicutes_A;c__Clostridia;o__Oscillospirales;f__Oscillospiraceae;g__Lawsonibacter;s__Lawsonibacter sp900764755	blast	90.7	None
RGVC182	GB_GCA_900766145.1	d__Bacteria;p__Firmicutes_A;c__Clostridia;o__Oscillospirales;f__Oscillospiraceae;g__Lawsonibacter;s__Lawsonibacter sp900766145	blast	91.7	iPHoP-RF;61.70
RGVC182	RS_GCF_000492175.1	d__Bacteria;p__Firmicutes_A;c__Clostridia;o__Oscillospirales;f__Oscillospiraceae;g__Lawsonibacter;s__Lawsonibacter sp000492175	blast	92.1	None
RGVC182	RS_GCF_002160305.1	d__Bacteria;p__Firmicutes_A;c__Clostridia;o__Oscillospirales;f__Oscillospiraceae;g__Lawsonibacter;s__Lawsonibacter sp002160305	blast	92.1	iPHoP-RF;63.50
RGVC182	RS_GCF_002161175.1	d__Bacteria;p__Firmicutes_A;c__Clostridia;o__Oscillospirales;f__Oscillospiraceae;g__Lawsonibacter;s__Lawsonibacter sp002161175	blast	93.3	None
RGVC182	RS_GCF_003112755.1	d__Bacteria;p__Firmicutes_A;c__Clostridia;o__Oscillospirales;f__Oscillospiraceae;g__Lawsonibacter;s__Lawsonibacter asaccharolyticus	blast	92.1	None
RGVC182	RS_GCF_003478995.1	d__Bacteria;p__Firmicutes_A;c__Clostridia;o__Oscillospirales;f__Oscillospiraceae;g__Lawsonibacter;s__Lawsonibacter sp003478995	blast	91.7	None
RGVC182	RS_GCF_003573975.1	d__Bacteria;p__Firmicutes_A;c__Clostridia;o__Oscillospirales;f__Oscillospiraceae;g__Lawsonibacter;s__Lawsonibacter sp900066825	blast	93.4	iPHoP-RF;65.80
RGVC182	RS_GCF_003612335.1	d__Bacteria;p__Firmicutes_A;c__Clostridia;o__Oscillospirales;f__Oscillospiraceae;g__Lawsonibacter;s__Lawsonibacter sp003612335	blast	92.5	None
RGVC182	RS_GCF_008727735.1	d__Bacteria;p__Firmicutes_A;c__Clostridia;o__Oscillospirales;f__Oscillospiraceae;g__Lawsonibacter;s__Lawsonibacter sp000177015	blast	92.2	iPHoP-RF;52.80
RGVC182	RS_GCF_009911595.1	d__Bacteria;p__Firmicutes_A;c__Clostridia;o__Oscillospirales;f__Oscillospiraceae;g__Lawsonibacter;s__Lawsonibacter sp009911595	blast	92.5	None
RGVC182	RS_GCF_009911645.1	d__Bacteria;p__Firmicutes_A;c__Clostridia;o__Oscillospirales;f__Oscillospiraceae;g__Lawsonibacter;s__Lawsonibacter sp009911645	blast	92.5	None
RGVC182	RS_GCF_009917615.1	d__Bacteria;p__Firmicutes_A;c__Clostridia;o__Oscillospirales;f__Oscillospiraceae;g__Lawsonibacter;s__Lawsonibacter sp009917615	blast	91.7	None
RGVC182	RS_GCF_014287875.1	d__Bacteria;p__Firmicutes_A;c__Clostridia;o__Oscillospirales;f__Oscillospiraceae;g__Lawsonibacter;s__Lawsonibacter sp014287875	blast	91.7	None
RGVC182	RS_GCF_902362775.1	d__Bacteria;p__Firmicutes_A;c__Clostridia;o__Oscillospirales;f__Oscillospiraceae;g__Lawsonibacter;s__Lawsonibacter sp900066645	blast	91.7	None
RGVC182	RS_GCF_902363045.1	d__Bacteria;p__Firmicutes_A;c__Clostridia;o__Oscillospirales;f__Oscillospiraceae;g__Lawsonibacter;s__Lawsonibacter sp902363045	blast	90.5	iPHoP-RF;60.30
RGVC183	RS_GCF_900199405.1	d__Bacteria;p__Firmicutes_A;c__Clostridia_A;o__Christensenellales;f__CAG-74;g__OEMS01;s__OEMS01 sp900199405	blast	92	None
RGVC184	GB_GCA_000434635.1	d__Bacteria;p__Firmicutes_A;c__Clostridia;o__Oscillospirales;f__Oscillospiraceae;g__CAG-110;s__CAG-110 sp000434635	blast	93.5	iPHoP-RF;62.70
RGVC184	GB_GCA_900546075.1	d__Bacteria;p__Firmicutes_A;c__Clostridia;o__Oscillospirales;f__Oscillospiraceae;g__CAG-110;s__CAG-110 sp900546075	blast	92	iPHoP-RF;72.40
RGVC185	GB_GCA_900543755.1	d__Bacteria;p__Firmicutes_A;c__Clostridia_A;o__Christensenellales;f__CAG-552;g__UBA10677;s__UBA10677 sp900543755	blast	93.9	None
RGVC185	GB_GCA_900553005.1	d__Bacteria;p__Firmicutes_A;c__Clostridia_A;o__Christensenellales;f__CAG-552;g__UBA10677;s__UBA10677 sp900553005	blast	91.8	None
RGVC185	RS_GCF_900760475.1	d__Bacteria;p__Firmicutes_A;c__Clostridia_A;o__Christensenellales;f__CAG-552;g__UBA10677;s__UBA10677 sp900760475	blast	91.8	None
RGVC185	RS_GCF_900767465.1	d__Bacteria;p__Firmicutes_A;c__Clostridia_A;o__Christensenellales;f__CAG-552;g__UBA10677;s__UBA10677 sp900767465	blast	91.8	None
RGVC186	GB_GCA_902766525.1	d__Bacteria;p__Firmicutes_B;c__Dehalobacteriia;o__UBA7702;f__UBA7702;g__UBA7702;s__UBA7702 sp902766525	blast	94.8	None
RGVC186	GB_GCA_902796855.1	d__Bacteria;p__Firmicutes_B;c__Dehalobacteriia;o__UBA7702;f__UBA7702;g__UBA7702;s__UBA7702 sp902796855	blast	94.1	iPHoP-RF;65.80
RGVC187	RS_GCF_902781305.1	d__Bacteria;p__Firmicutes_C;c__Negativicutes;o__Selenomonadales;f__Selenomonadaceae;g__Selenomonas_A;s__Selenomonas_A ruminantium_K	blast	93.2	None
RGVC189	3300010262_15	d__Bacteria;p__Firmicutes_A;c__Clostridia;o__Oscillospirales;f__Oscillospiraceae;g__Dysosmobacter;s__	blast	93.2	None
RGVC189	RS_GCF_014334055.1	d__Bacteria;p__Firmicutes_A;c__Clostridia;o__Oscillospirales;f__Oscillospiraceae;g__NSJ-62;s__NSJ-62 sp014334055	blast	91.8	None
RGVC189	RS_GCF_005121165.1	d__Bacteria;p__Firmicutes_A;c__Clostridia;o__Oscillospirales;f__Oscillospiraceae;g__Dysosmobacter;s__Dysosmobacter welbionis	blast	91.7	None
RGVC189	GB_GCA_900548505.1	d__Bacteria;p__Firmicutes_A;c__Clostridia;o__Oscillospirales;f__Oscillospiraceae;g__Dysosmobacter;s__Dysosmobacter sp900548505	blast	90.4	None
RGVC189	GB_GCA_004558115.1	d__Bacteria;p__Firmicutes_A;c__Clostridia;o__Oscillospirales;f__Oscillospiraceae;g__Dysosmobacter;s__Dysosmobacter sp004558115	blast	90.1	None
RGVC191	GB_GCA_000436375.1	d__Bacteria;p__Proteobacteria;c__Alphaproteobacteria;o__RF32;f__CAG-239;g__CAG-495;s__CAG-495 sp000436375	blast	96.9	None
RGVC191	GB_GCA_001917125.1	d__Bacteria;p__Proteobacteria;c__Alphaproteobacteria;o__RF32;f__CAG-239;g__CAG-495;s__CAG-495 sp001917125	blast	91.7	iPHoP-RF;54.60
RGVC193	3300010259_5	d__Bacteria;p__Firmicutes_A;c__Clostridia;o__Oscillospirales;f__Oscillospiraceae;g__CAG-110;s__	blast	91.2	iPHoP-RF;63.00
RGVC193	3300010278_34	d__Bacteria;p__Firmicutes_A;c__Clostridia;o__Oscillospirales;f__Oscillospiraceae;g__CAG-110;s__	blast	91.3	iPHoP-RF;73.70
RGVC193	3300010280_27	d__Bacteria;p__Firmicutes_A;c__Clostridia;o__Oscillospirales;f__Oscillospiraceae;g__CAG-110;s__	blast	91.2	iPHoP-RF;77.50
RGVC193	3300022660_140	d__Bacteria;p__Firmicutes_A;c__Clostridia;o__Oscillospirales;f__Oscillospiraceae;g__CAG-110;s__	blast	93.7	None
RGVC193	GB_GCA_000434635.1	d__Bacteria;p__Firmicutes_A;c__Clostridia;o__Oscillospirales;f__Oscillospiraceae;g__CAG-110;s__CAG-110 sp000434635	blast	91.7	iPHoP-RF;80.60
RGVC193	GB_GCA_002362145.1	d__Bacteria;p__Firmicutes_A;c__Clostridia;o__Oscillospirales;f__Oscillospiraceae;g__CAG-110;s__CAG-110 sp002362145	blast	91.9	iPHoP-RF;76.40
RGVC193	GB_GCA_002362625.1	d__Bacteria;p__Firmicutes_A;c__Clostridia;o__Oscillospirales;f__Oscillospiraceae;g__CAG-110;s__CAG-110 sp002362625	blast	91.9	iPHoP-RF;69.80
RGVC193	GB_GCA_002436765.1	d__Bacteria;p__Firmicutes_A;c__Clostridia;o__Oscillospirales;f__Oscillospiraceae;g__CAG-110;s__CAG-110 sp002436765	blast	92.1	iPHoP-RF;63.80
RGVC193	GB_GCA_002437585.1	d__Bacteria;p__Firmicutes_A;c__Clostridia;o__Oscillospirales;f__Oscillospiraceae;g__CAG-110;s__CAG-110 sp002437585	blast	91.9	iPHoP-RF;72.20
RGVC193	GB_GCA_002493965.1	d__Bacteria;p__Firmicutes_A;c__Clostridia;o__Oscillospirales;f__Oscillospiraceae;g__CAG-110;s__CAG-110 sp002493965	blast	91.9	iPHoP-RF;59.00
RGVC193	GB_GCA_004555705.1	d__Bacteria;p__Firmicutes_A;c__Clostridia;o__Oscillospirales;f__Oscillospiraceae;g__CAG-110;s__CAG-110 sp004555705	blast	91.8	iPHoP-RF;83.90
RGVC193	GB_GCA_004562395.1	d__Bacteria;p__Firmicutes_A;c__Clostridia;o__Oscillospirales;f__Oscillospiraceae;g__CAG-110;s__CAG-110 sp004562395	blast	91	iPHoP-RF;84.20
RGVC193	GB_GCA_900540635.1	d__Bacteria;p__Firmicutes_A;c__Clostridia;o__Oscillospirales;f__Oscillospiraceae;g__CAG-110;s__CAG-110 sp900540635	blast	91.2	iPHoP-RF;73.50
RGVC193	GB_GCA_900544405.1	d__Bacteria;p__Firmicutes_A;c__Clostridia;o__Oscillospirales;f__Oscillospiraceae;g__CAG-110;s__CAG-110 sp900544405	blast	92.7	iPHoP-RF;73.50
RGVC193	GB_GCA_900544945.1	d__Bacteria;p__Firmicutes_A;c__Clostridia;o__Oscillospirales;f__Oscillospiraceae;g__CAG-110;s__CAG-110 sp900544945	blast	91.8	iPHoP-RF;73.00
RGVC193	GB_GCA_900546075.1	d__Bacteria;p__Firmicutes_A;c__Clostridia;o__Oscillospirales;f__Oscillospiraceae;g__CAG-110;s__CAG-110 sp900546075	blast	92.1	iPHoP-RF;83.30
RGVC193	GB_GCA_900547405.1	d__Bacteria;p__Firmicutes_A;c__Clostridia;o__Oscillospirales;f__Oscillospiraceae;g__CAG-110;s__CAG-110 sp900547405	blast	91.2	iPHoP-RF;73.00
RGVC193	GB_GCA_900549495.1	d__Bacteria;p__Firmicutes_A;c__Clostridia;o__Oscillospirales;f__Oscillospiraceae;g__CAG-110;s__CAG-110 sp900549495	blast	91.3	iPHoP-RF;76.80
RGVC193	GB_GCA_900549705.1	d__Bacteria;p__Firmicutes_A;c__Clostridia;o__Oscillospirales;f__Oscillospiraceae;g__CAG-110;s__CAG-110 sp900549705	blast	91.3	iPHoP-RF;56.00
RGVC193	GB_GCA_900553805.1	d__Bacteria;p__Firmicutes_A;c__Clostridia;o__Oscillospirales;f__Oscillospiraceae;g__CAG-110;s__CAG-110 sp900553805	blast	91.2	iPHoP-RF;81.90
RGVC193	GB_GCA_900554625.1	d__Bacteria;p__Firmicutes_A;c__Clostridia;o__Oscillospirales;f__Oscillospiraceae;g__CAG-110;s__CAG-110 sp900554625	blast	91.8	iPHoP-RF;67.50
RGVC193	GB_GCA_900556935.1	d__Bacteria;p__Firmicutes_A;c__Clostridia;o__Oscillospirales;f__Oscillospiraceae;g__CAG-110;s__CAG-110 sp900556935	blast	91.3	iPHoP-RF;86.30
RGVC193	GB_GCA_900752285.1	d__Bacteria;p__Firmicutes_A;c__Clostridia;o__Oscillospirales;f__Oscillospiraceae;g__CAG-110;s__CAG-110 sp900752285	blast	91.3	iPHoP-RF;83.30
RGVC193	GB_GCA_900762245.1	d__Bacteria;p__Firmicutes_A;c__Clostridia;o__Oscillospirales;f__Oscillospiraceae;g__CAG-110;s__CAG-110 sp900762245	blast	91.9	iPHoP-RF;59.00
RGVC193	GB_GCA_900762935.1	d__Bacteria;p__Firmicutes_A;c__Clostridia;o__Oscillospirales;f__Oscillospiraceae;g__CAG-110;s__CAG-110 sp900762935	blast	91.3	iPHoP-RF;73.90
RGVC193	GB_GCA_900763965.1	d__Bacteria;p__Firmicutes_A;c__Clostridia;o__Oscillospirales;f__Oscillospiraceae;g__CAG-110;s__CAG-110 sp900763965	blast	92.1	iPHoP-RF;80.00
RGVC193	GB_GCA_900769835.1	d__Bacteria;p__Firmicutes_A;c__Clostridia;o__Oscillospirales;f__Oscillospiraceae;g__CAG-110;s__CAG-110 sp900769835	blast	91.5	None
RGVC193	GB_GCA_900769845.1	d__Bacteria;p__Firmicutes_A;c__Clostridia;o__Oscillospirales;f__Oscillospiraceae;g__CAG-110;s__CAG-110 sp900769845	blast	91.3	None
RGVC193	GB_GCA_900770015.1	d__Bacteria;p__Firmicutes_A;c__Clostridia;o__Oscillospirales;f__Oscillospiraceae;g__CAG-110;s__CAG-110 sp900770015	blast	91.2	iPHoP-RF;78.70
RGVC194	RS_GCF_900104665.1	d__Bacteria;p__Firmicutes;c__Bacilli;o__Erysipelotrichales;f__Erysipelotrichaceae;g__Traorella;s__Traorella massiliensis	blast	92.9	None
RGVC196	GB_GCA_002491825.1	d__Bacteria;p__Firmicutes_A;c__Clostridia;o__Oscillospirales;f__Acutalibacteraceae;g__Ruminococcus_E;s__Ruminococcus_E sp002491825	blast	90	None
RGVC196	GB_GCA_002493005.1	d__Bacteria;p__Firmicutes_A;c__Clostridia;o__Oscillospirales;f__Acutalibacteraceae;g__Ruminococcus_E;s__Ruminococcus_E sp002493005	blast	90.7	None
RGVC196	GB_GCA_900543095.1	d__Bacteria;p__Firmicutes_A;c__Clostridia;o__Oscillospirales;f__Acutalibacteraceae;g__Ruminococcus_E;s__Ruminococcus_E sp900543095	blast	90.1	None
RGVC196	GB_GCA_902771755.1	d__Bacteria;p__Firmicutes_A;c__Clostridia;o__Oscillospirales;f__Acutalibacteraceae;g__Ruminococcus_E;s__Ruminococcus_E sp902771755	blast	90.8	None
RGVC196	RS_GCF_002834225.1	d__Bacteria;p__Firmicutes_A;c__Clostridia;o__Oscillospirales;f__Acutalibacteraceae;g__Ruminococcus_E;s__Ruminococcus_E bromii	blast	90.3	None
RGVC196	RS_GCF_002834235.1	d__Bacteria;p__Firmicutes_A;c__Clostridia;o__Oscillospirales;f__Acutalibacteraceae;g__Ruminococcus_E;s__Ruminococcus_E bromii_B	blast	90.5	None
RGVC196	RS_GCF_902760805.1	d__Bacteria;p__Firmicutes_A;c__Clostridia;o__Oscillospirales;f__Ruminococcaceae;g__Ruminococcus;s__Ruminococcus sp002394695	blast	90.9	None
RGVC198	3300022660_169	d__Bacteria;p__Firmicutes_A;c__Clostridia_A;o__Christensenellales;f__Borkfalkiaceae;g__UBA1259;s__	blast	90.4	iPHoP-RF;74.10
RGVC198	GB_GCA_000434435.1	d__Bacteria;p__Firmicutes_A;c__Clostridia_A;o__Christensenellales;f__CAG-917;g__CAG-475;s__CAG-475 sp000434435	blast	90.8	iPHoP-RF;88.50
RGVC198	GB_GCA_000437515.1	d__Bacteria;p__Firmicutes_A;c__Clostridia_A;o__Christensenellales;f__Borkfalkiaceae;g__UBA10281;s__UBA10281 sp000437515	blast	90.8	iPHoP-RF;79.80
RGVC198	RS_GCF_900769565.1	d__Bacteria;p__Firmicutes_A;c__Clostridia_A;o__Christensenellales;f__Borkfalkiaceae;g__UBA1259;s__UBA1259 sp900769565	blast	91.9	iPHoP-RF;63.80
RGVC198	RS_GCF_900771345.1	d__Bacteria;p__Firmicutes_A;c__Clostridia_A;o__Christensenellales;f__Borkfalkiaceae;g__UBA1259;s__UBA1259 sp900771345	blast	90	iPHoP-RF;70.00
RGVC199	GB_GCA_001603025.1	d__Bacteria;p__Firmicutes_A;c__Clostridia_A;o__Christensenellales;f__CAG-74;g__Firm-10;s__Firm-10 sp001603025	blast	90.2	None
RGVC199	GB_GCA_004563405.1	d__Bacteria;p__Firmicutes_A;c__Clostridia_A;o__Christensenellales;f__CAG-74;g__SFTH01;s__SFTH01 sp004563405	blast	93.9	None
RGVC202	GB_GCA_014384785.1	d__Bacteria;p__Firmicutes_A;c__Clostridia;o__Monoglobales_A;f__UBA9506;g__UBA9506;s__UBA9506 sp003506415	blast	93.6	iPHoP-RF;81.60
RGVC203	3300018430_43	d__Bacteria;p__Bacteroidota;c__Bacteroidia;o__Bacteroidales;f__Bacteroidaceae;g__HGM04593;s__	blast	90.5	iPHoP-RF;72.20
RGVC203	3300018430_52	d__Bacteria;p__Bacteroidota;c__Bacteroidia;o__Bacteroidales;f__Bacteroidaceae;g__;s__	blast	92	iPHoP-RF;73.70
RGVC203	3300022661_113	d__Bacteria;p__Bacteroidota;c__Bacteroidia;o__Bacteroidales;f__Bacteroidaceae;g__HGM04593;s__	blast	92	iPHoP-RF;76.80
RGVC203	3300022661_76	d__Bacteria;p__Bacteroidota;c__Bacteroidia;o__Bacteroidales;f__Bacteroidaceae;g__;s__	blast	92.1	iPHoP-RF;64.00
RGVC203	RS_GCF_900769465.1	d__Bacteria;p__Bacteroidota;c__Bacteroidia;o__Bacteroidales;f__Bacteroidaceae;g__HGM04593;s__HGM04593 sp900769465	blast	95.5	iPHoP-RF;73.20
RGVC203	RS_GCF_900769765.1	d__Bacteria;p__Bacteroidota;c__Bacteroidia;o__Bacteroidales;f__Bacteroidaceae;g__HGM04593;s__HGM04593 sp900769765	blast	93.5	iPHoP-RF;77.10
RGVC203	RS_GCF_900770655.1	d__Bacteria;p__Bacteroidota;c__Bacteroidia;o__Bacteroidales;f__Bacteroidaceae;g__HGM04593;s__HGM04593 sp900770655	blast	92	iPHoP-RF;74.60
RGVC203	RS_GCF_900770665.1	d__Bacteria;p__Bacteroidota;c__Bacteroidia;o__Bacteroidales;f__Bacteroidaceae;g__HGM04593;s__HGM04593 sp900770665	blast	95.4	iPHoP-RF;80.00
RGVC205	RS_GCF_003573975.1	d__Bacteria;p__Firmicutes_A;c__Clostridia;o__Oscillospirales;f__Oscillospiraceae;g__Lawsonibacter;s__Lawsonibacter sp900066825	blast	93.4	iPHoP-RF;58.70
RGVC205	RS_GCF_014287875.1	d__Bacteria;p__Firmicutes_A;c__Clostridia;o__Oscillospirales;f__Oscillospiraceae;g__Lawsonibacter;s__Lawsonibacter sp014287875	blast	90.1	None
RGVC206	3300010262_15	d__Bacteria;p__Firmicutes_A;c__Clostridia;o__Oscillospirales;f__Oscillospiraceae;g__Dysosmobacter;s__	blast	92	None
RGVC206	3300012889_21	d__Bacteria;p__Firmicutes_A;c__Clostridia;o__Oscillospirales;f__Oscillospiraceae;g__;s__	blast	91.8	None
RGVC206	GB_GCA_000436875.1	d__Bacteria;p__Firmicutes_A;c__Clostridia;o__Oscillospirales;f__Oscillospiraceae;g__Dysosmobacter;s__Dysosmobacter sp000436875	blast	91.7	None
RGVC206	GB_GCA_004558115.1	d__Bacteria;p__Firmicutes_A;c__Clostridia;o__Oscillospirales;f__Oscillospiraceae;g__Dysosmobacter;s__Dysosmobacter sp004558115	blast	91.9	None
RGVC206	GB_GCA_009774015.1	d__Bacteria;p__Firmicutes_A;c__Clostridia;o__Oscillospirales;f__Oscillospiraceae;g__Dysosmobacter;s__Dysosmobacter sp009774015	blast	92.1	None
RGVC206	GB_GCA_900546705.1	d__Bacteria;p__Firmicutes_A;c__Clostridia;o__Oscillospirales;f__Oscillospiraceae;g__Dysosmobacter;s__Dysosmobacter sp900546705	blast	91.9	None
RGVC206	RS_GCF_000403435.2	d__Bacteria;p__Firmicutes_A;c__Clostridia;o__Oscillospirales;f__Oscillospiraceae;g__Dysosmobacter;s__Dysosmobacter sp000403435	blast	92	None
RGVC206	RS_GCF_005121165.1	d__Bacteria;p__Firmicutes_A;c__Clostridia;o__Oscillospirales;f__Oscillospiraceae;g__Dysosmobacter;s__Dysosmobacter welbionis	blast	92	None
RGVC206	RS_GCF_014297285.1	d__Bacteria;p__Firmicutes_A;c__Clostridia;o__Oscillospirales;f__Oscillospiraceae;g__Dysosmobacter;s__Dysosmobacter sp001916835	blast	92	None
RGVC207	GB_GCA_000434215.1	d__Bacteria;p__Bacteroidota;c__Bacteroidia;o__Bacteroidales;f__UBA11471;g__UBA11471;s__UBA11471 sp000434215	blast	93	iPHoP-RF;76.60
RGVC207	GB_GCA_900542765.1	d__Bacteria;p__Bacteroidota;c__Bacteroidia;o__Bacteroidales;f__UBA11471;g__UBA11471;s__UBA11471 sp900542765	blast	91	iPHoP-RF;67.00
RGVC207	GB_GCA_900547555.1	d__Bacteria;p__Bacteroidota;c__Bacteroidia;o__Bacteroidales;f__UBA11471;g__UBA11471;s__UBA11471 sp900547555	blast	91.9	iPHoP-RF;79.50
RGVC208	RS_GCF_000220085.1	d__Bacteria;p__Firmicutes;c__Bacilli;o__Lactobacillales;f__Streptococcaceae;g__Streptococcus;s__Streptococcus mitis_K	blast	90.5	None
RGVC208	RS_GCF_000222765.1	d__Bacteria;p__Firmicutes;c__Bacilli;o__Lactobacillales;f__Streptococcaceae;g__Streptococcus;s__Streptococcus cristatus	blast	90.4	None
RGVC208	RS_GCF_002161215.1	d__Bacteria;p__Firmicutes_A;c__Clostridia;o__Oscillospirales;f__Oscillospiraceae;g__Flavonifractor;s__Flavonifractor sp002161215	blast	91.9	None
RGVC208	RS_GCF_900626145.1	d__Bacteria;p__Firmicutes_A;c__Clostridia;o__Oscillospirales;f__Oscillospiraceae;g__Intestinimonas;s__Intestinimonas timonensis	blast	91.2	None
RGVC209	GB_GCA_000434635.1	d__Bacteria;p__Firmicutes_A;c__Clostridia;o__Oscillospirales;f__Oscillospiraceae;g__CAG-110;s__CAG-110 sp000434635	blast	96.9	iPHoP-RF;83.90
RGVC209	GB_GCA_900540635.1	d__Bacteria;p__Firmicutes_A;c__Clostridia;o__Oscillospirales;f__Oscillospiraceae;g__CAG-110;s__CAG-110 sp900540635	blast	93.2	iPHoP-RF;68.90
RGVC209	GB_GCA_900763965.1	d__Bacteria;p__Firmicutes_A;c__Clostridia;o__Oscillospirales;f__Oscillospiraceae;g__CAG-110;s__CAG-110 sp900763965	blast	91.8	iPHoP-RF;68.40
RGVC209	GB_GCA_900546075.1	d__Bacteria;p__Firmicutes_A;c__Clostridia;o__Oscillospirales;f__Oscillospiraceae;g__CAG-110;s__CAG-110 sp900546075	blast	90.2	iPHoP-RF;70.20
RGVC210	3300029684_10	d__Bacteria;p__Bacteroidota;c__Bacteroidia;o__Bacteroidales;f__Tannerellaceae;g__Parabacteroides;s__	iPHoP-RF	90.1	None
RGVC210	GB_GCA_002314265.1	d__Bacteria;p__Bacteroidota;c__Bacteroidia;o__Flavobacteriales;f__UBA1820;g__UBA1820;s__UBA1820 sp002314265	blast	93.7	iPHoP-RF;60.30
RGVC211	3300010275_18	d__Bacteria;p__Firmicutes_A;c__Clostridia_A;o__Christensenellales;f__UBA1750;g__UBA7102;s__	blast	92	None
RGVC211	GB_GCA_002315655.1	d__Bacteria;p__Firmicutes_A;c__Clostridia_A;o__Christensenellales;f__UBA1750;g__UBA7102;s__UBA7102 sp002315655	blast	92.1	None
RGVC211	GB_GCA_002492415.1	d__Bacteria;p__Firmicutes_A;c__Clostridia_A;o__Christensenellales;f__UBA1750;g__UBA7102;s__UBA7102 sp002492415	blast	91.9	None
RGVC211	RS_GCF_900760085.1	d__Bacteria;p__Firmicutes_A;c__Clostridia_A;o__Christensenellales;f__UBA1750;g__UBA7102;s__UBA7102 sp900760085	blast	91.7	None
RGVC212	RS_GCF_000317595.1	d__Bacteria;p__Actinobacteriota;c__Actinomycetia;o__Streptomycetales;f__Streptomycetaceae;g__Streptomyces;s__Streptomyces ipomoeae	blast	96.9	None
RGVC212	RS_GCF_001187435.1	d__Bacteria;p__Actinobacteriota;c__Actinomycetia;o__Streptomycetales;f__Streptomycetaceae;g__Streptomyces;s__Streptomyces caatingaensis	blast	96.9	None
RGVC212	RS_GCF_002910915.1	d__Bacteria;p__Actinobacteriota;c__Actinomycetia;o__Streptomycetales;f__Streptomycetaceae;g__Streptomyces;s__Streptomyces sp002910915	blast	96.9	None
RGVC212	RS_GCF_003121295.1	d__Bacteria;p__Actinobacteriota;c__Actinomycetia;o__Streptomycetales;f__Streptomycetaceae;g__Streptomyces;s__Streptomyces orinoci	blast	96.9	None
RGVC212	RS_GCF_007896895.1	d__Bacteria;p__Actinobacteriota;c__Actinomycetia;o__Streptomycetales;f__Streptomycetaceae;g__Streptomyces;s__Streptomyces misionensis_A	blast	96.9	None
RGVC213	RS_GCF_000492175.1	d__Bacteria;p__Firmicutes_A;c__Clostridia;o__Oscillospirales;f__Oscillospiraceae;g__Lawsonibacter;s__Lawsonibacter sp000492175	blast	91.6	None
RGVC213	RS_GCF_003573975.1	d__Bacteria;p__Firmicutes_A;c__Clostridia;o__Oscillospirales;f__Oscillospiraceae;g__Lawsonibacter;s__Lawsonibacter sp900066825	blast	91.8	iPHoP-RF;72.40
RGVC217	GB_GCA_000434635.1	d__Bacteria;p__Firmicutes_A;c__Clostridia;o__Oscillospirales;f__Oscillospiraceae;g__CAG-110;s__CAG-110 sp000434635	blast	96.7	iPHoP-RF;53.00
RGVC217	GB_GCA_002362625.1	d__Bacteria;p__Firmicutes_A;c__Clostridia;o__Oscillospirales;f__Oscillospiraceae;g__CAG-110;s__CAG-110 sp002362625	blast	94.9	iPHoP-RF;71.10
RGVC217	GB_GCA_002436765.1	d__Bacteria;p__Firmicutes_A;c__Clostridia;o__Oscillospirales;f__Oscillospiraceae;g__CAG-110;s__CAG-110 sp002436765	blast	96.5	iPHoP-RF;75.90
RGVC217	GB_GCA_002437585.1	d__Bacteria;p__Firmicutes_A;c__Clostridia;o__Oscillospirales;f__Oscillospiraceae;g__CAG-110;s__CAG-110 sp002437585	blast	90.2	iPHoP-RF;74.60
RGVC217	GB_GCA_002493965.1	d__Bacteria;p__Firmicutes_A;c__Clostridia;o__Oscillospirales;f__Oscillospiraceae;g__CAG-110;s__CAG-110 sp002493965	blast	93.3	iPHoP-RF;70.90
RGVC217	GB_GCA_900544945.1	d__Bacteria;p__Firmicutes_A;c__Clostridia;o__Oscillospirales;f__Oscillospiraceae;g__CAG-110;s__CAG-110 sp900544945	blast	90.2	iPHoP-RF;72.40
RGVC217	GB_GCA_900546075.1	d__Bacteria;p__Firmicutes_A;c__Clostridia;o__Oscillospirales;f__Oscillospiraceae;g__CAG-110;s__CAG-110 sp900546075	blast	91.7	iPHoP-RF;74.80
RGVC219	3300022821_12	d__Bacteria;p__Patescibacteria;c__Paceibacteria;o__UBA9983_A;f__UBA2163;g__;s__	iPHoP-RF	92.8	None
RGVC219	GB_GCA_000990325.1	d__Bacteria;p__Patescibacteria;c__Paceibacteria;o__UBA9983_A;f__UBA9973;g__UBA8515;s__UBA8515 sp000990325	iPHoP-RF	91.4	None
RGVC219	GB_GCA_002422025.1	d__Bacteria;p__Patescibacteria;c__Paceibacteria;o__UBA9983_A;f__UBA2163;g__UBA918;s__UBA918 sp002422025	iPHoP-RF	91.8	None
RGVC221	3300023033_2	d__Bacteria;p__Firmicutes_A;c__Clostridia;o__Oscillospirales;f__Acutalibacteraceae;g__CAG-180;s__	blast	92.9	None
RGVC222	GB_GCA_900544525.1	d__Bacteria;p__Firmicutes_A;c__Clostridia;o__Lachnospirales;f__Lachnospiraceae;g__UMGS680;s__UMGS680 sp900544525	blast	90.9	None
RGVC222	RS_GCF_002874775.1	d__Bacteria;p__Firmicutes_A;c__Clostridia;o__Monoglobales;f__Monoglobaceae;g__Monoglobus;s__Monoglobus pectinilyticus	blast	91	None
RGVC222	RS_GCF_003460745.1	d__Bacteria;p__Firmicutes_A;c__Clostridia;o__Monoglobales_A;f__UBA1381;g__CAG-41;s__CAG-41 sp900066215	blast	90.9	iPHoP-RF;76.80
RGVC223	GB_GCA_902766575.1	d__Bacteria;p__Firmicutes_A;c__Clostridia;o__Oscillospirales;f__CAG-272;g__UMGS874;s__UMGS874 sp902766575	blast	96.5	None
RGVC223	GB_GCA_900546315.1	d__Bacteria;p__Firmicutes_A;c__Clostridia;o__Oscillospirales;f__CAG-272;g__UMGS874;s__UMGS874 sp900546315	blast	90	None
RGVC224	GB_GCA_900317425.1	d__Bacteria;p__Firmicutes_A;c__Clostridia;o__Oscillospirales;f__Oscillospiraceae;g__CAG-83;s__CAG-83 sp900317425	blast	91.7	iPHoP-RF;54.60
RGVC224	GB_GCA_900545495.1	d__Bacteria;p__Firmicutes_A;c__Clostridia;o__Oscillospirales;f__Oscillospiraceae;g__CAG-83;s__CAG-83 sp900545495	blast	90.2	iPHoP-RF;50.20
RGVC224	GB_GCA_900548615.1	d__Bacteria;p__Firmicutes_A;c__Clostridia;o__Oscillospirales;f__Oscillospiraceae;g__CAG-83;s__CAG-83 sp900548615	blast	90.2	None
RGVC224	GB_GCA_900550585.1	d__Bacteria;p__Firmicutes_A;c__Clostridia;o__Oscillospirales;f__Oscillospiraceae;g__CAG-83;s__CAG-83 sp900550585	blast	90	None
RGVC225	GB_GCA_000434435.1	d__Bacteria;p__Firmicutes_A;c__Clostridia_A;o__Christensenellales;f__CAG-917;g__CAG-475;s__CAG-475 sp000434435	blast	95.6	iPHoP-RF;88.50
RGVC225	GB_GCA_002449145.1	d__Bacteria;p__Firmicutes_A;c__Clostridia_A;o__Christensenellales;f__CAG-917;g__CAG-475;s__CAG-475 sp002449145	blast	94.2	iPHoP-RF;84.20
RGVC225	GB_GCA_900547975.1	d__Bacteria;p__Firmicutes_A;c__Clostridia_A;o__Christensenellales;f__CAG-917;g__CAG-475;s__CAG-475 sp900547975	blast	91.4	iPHoP-RF;83.30
RGVC226	3300019376_18	d__Bacteria;p__Firmicutes_A;c__Clostridia_A;o__Christensenellales;f__CAG-74;g__Firm-11;s__	blast	91.8	None
RGVC226	3300022660_71	d__Bacteria;p__Firmicutes_A;c__Clostridia_A;o__Christensenellales;f__CAG-74;g__Firm-11;s__	blast	91.8	iPHoP-RF;50.20
RGVC226	GB_GCA_004556545.1	d__Bacteria;p__Firmicutes_A;c__Clostridia_A;o__Christensenellales;f__CAG-74;g__Firm-11;s__Firm-11 sp004556545	blast	91.7	None
RGVC226	GB_GCA_012729115.1	d__Bacteria;p__Firmicutes_A;c__Clostridia_A;o__Christensenellales;f__CAG-74;g__Firm-11;s__Firm-11 sp012729115	blast	91.8	None
RGVC226	GB_GCA_900540045.1	d__Bacteria;p__Firmicutes_A;c__Clostridia_A;o__Christensenellales;f__CAG-74;g__Firm-11;s__Firm-11 sp900540045	blast	94.7	iPHoP-RF;63.80
RGVC226	GB_GCA_900548145.1	d__Bacteria;p__Firmicutes_A;c__Clostridia_A;o__Christensenellales;f__CAG-74;g__Firm-11;s__Firm-11 sp900548145	blast	91.7	None
RGVC226	GB_GCA_900550955.1	d__Bacteria;p__Firmicutes_A;c__Clostridia_A;o__Christensenellales;f__CAG-74;g__Firm-11;s__Firm-11 sp900550955	blast	92.1	None
RGVC228	RS_GCF_900095865.1	d__Bacteria;p__Firmicutes_A;c__Clostridia;o__Oscillospirales;f__Ruminococcaceae;g__Massilioclostridium;s__Massilioclostridium coli	blast	92.2	None
RGVC229	GB_GCA_900315545.1	d__Bacteria;p__Bacteroidota;c__Bacteroidia;o__Bacteroidales;f__Bacteroidaceae;g__Prevotella;s__Prevotella sp900315545	blast	93.2	iPHoP-RF;65.80
RGVC230	2703719120	d__Bacteria;p__Firmicutes;c__Bacilli;o__RF39;f__UBA660;g__UBA3789;s__	blast	93.7	iPHoP-RF;61.10
RGVC232	GB_GCA_004556545.1	d__Bacteria;p__Firmicutes_A;c__Clostridia_A;o__Christensenellales;f__CAG-74;g__Firm-11;s__Firm-11 sp004556545	blast	92.4	None
RGVC233	GB_GCA_004557905.1	d__Bacteria;p__Firmicutes_A;c__Clostridia_A;o__Christensenellales;f__CAG-74;g__SFFH01;s__SFFH01 sp004557905	blast	92	None
RGVC234	GB_GCA_000434555.1	d__Bacteria;p__Firmicutes;c__Bacilli;o__RF39;f__UBA660;g__CAG-1000;s__CAG-1000 sp000434555	blast	91.8	iPHoP-RF;69.80
RGVC234	RS_GCF_900768345.1	d__Bacteria;p__Firmicutes;c__Bacilli;o__RF39;f__UBA660;g__CAG-1000;s__CAG-1000 sp900768345	blast	91.7	iPHoP-RF;74.30
RGVC235	GB_GCA_902765305.1	d__Bacteria;p__Firmicutes_A;c__Clostridia_A;o__Christensenellales;f__CAG-74;g__UBA2862;s__UBA2862 sp902765305	blast	90.8	None
RGVC235	GB_GCA_902765395.1	d__Bacteria;p__Firmicutes_A;c__Clostridia_A;o__Christensenellales;f__CAG-74;g__UBA2862;s__UBA2862 sp902765395	blast	90.8	None
RGVC235	GB_GCA_902785105.1	d__Bacteria;p__Firmicutes_A;c__Clostridia_A;o__Christensenellales;f__CAG-74;g__UBA2862;s__UBA2862 sp902785105	blast	90.8	None
RGVC235	GB_GCA_902799465.1	d__Bacteria;p__Firmicutes_A;c__Clostridia_A;o__Christensenellales;f__CAG-74;g__UBA2862;s__UBA2862 sp902799465	blast	90	None
RGVC236	3300005460_45	d__Bacteria;p__Bacteroidota;c__Bacteroidia;o__Bacteroidales;f__Rikenellaceae;g__Alistipes;s__	blast	90.7	iPHoP-RF;61.70
RGVC236	3300012979_31	d__Bacteria;p__Bacteroidota;c__Bacteroidia;o__Bacteroidales;f__Rikenellaceae;g__Alistipes;s__	blast	90.6	None
RGVC236	3300012983_41	d__Bacteria;p__Bacteroidota;c__Bacteroidia;o__Bacteroidales;f__Rikenellaceae;g__Alistipes;s__	blast	92	iPHoP-RF;55.70
RGVC236	3300018427_78	d__Bacteria;p__Bacteroidota;c__Bacteroidia;o__Bacteroidales;f__Rikenellaceae;g__Alistipes;s__	blast	91.1	None
RGVC236	3300018878_209	d__Bacteria;p__Bacteroidota;c__Bacteroidia;o__Bacteroidales;f__Rikenellaceae;g__Alistipes;s__	blast	91.6	iPHoP-RF;75.00
RGVC236	3300022660_101	d__Bacteria;p__Bacteroidota;c__Bacteroidia;o__Bacteroidales;f__Rikenellaceae;g__Alistipes;s__	blast	91.7	iPHoP-RF;67.30
RGVC236	3300022660_93	d__Bacteria;p__Bacteroidota;c__Bacteroidia;o__Bacteroidales;f__Rikenellaceae;g__Alistipes;s__	blast	91.1	iPHoP-RF;55.70
RGVC236	3300022661_91	d__Bacteria;p__Bacteroidota;c__Bacteroidia;o__Bacteroidales;f__Rikenellaceae;g__Alistipes;s__	blast	91.1	iPHoP-RF;64.00
RGVC236	3300022753_111	d__Bacteria;p__Bacteroidota;c__Bacteroidia;o__Bacteroidales;f__Rikenellaceae;g__Alistipes;s__	blast	93.8	iPHoP-RF;56.50
RGVC236	GB_GCA_002362235.1	d__Bacteria;p__Bacteroidota;c__Bacteroidia;o__Bacteroidales;f__Rikenellaceae;g__Alistipes;s__Alistipes sp002362235	blast	90.9	iPHoP-RF;51.50
RGVC236	GB_GCA_900546065.1	d__Bacteria;p__Bacteroidota;c__Bacteroidia;o__Bacteroidales;f__Rikenellaceae;g__Alistipes;s__Alistipes sp900546065	blast	91.8	iPHoP-RF;73.20
RGVC236	GB_GCA_900548155.1	d__Bacteria;p__Bacteroidota;c__Bacteroidia;o__Bacteroidales;f__Rikenellaceae;g__Alistipes;s__Alistipes sp900548155	blast	91.3	iPHoP-RF;62.20
RGVC236	GB_GCA_900550375.1	d__Bacteria;p__Bacteroidota;c__Bacteroidia;o__Bacteroidales;f__Rikenellaceae;g__Alistipes;s__Alistipes sp900550375	blast	90.7	iPHoP-RF;61.70
RGVC236	GB_GCA_900552955.1	d__Bacteria;p__Bacteroidota;c__Bacteroidia;o__Bacteroidales;f__Rikenellaceae;g__Alistipes;s__Alistipes sp900552955	blast	90.7	iPHoP-RF;70.60
RGVC236	GB_GCA_900761235.1	d__Bacteria;p__Bacteroidota;c__Bacteroidia;o__Bacteroidales;f__Rikenellaceae;g__Alistipes;s__Alistipes sp900761235	blast	91.5	iPHoP-RF;66.80
RGVC236	GB_GCA_900766655.1	d__Bacteria;p__Bacteroidota;c__Bacteroidia;o__Bacteroidales;f__Rikenellaceae;g__Alistipes;s__Alistipes sp900766655	blast	90.8	None
RGVC236	GB_GCA_900768045.1	d__Bacteria;p__Bacteroidota;c__Bacteroidia;o__Bacteroidales;f__Rikenellaceae;g__Alistipes;s__Alistipes sp900768045	blast	92.1	iPHoP-RF;51.70
RGVC236	GB_GCA_900769745.1	d__Bacteria;p__Bacteroidota;c__Bacteroidia;o__Bacteroidales;f__Rikenellaceae;g__Alistipes;s__Alistipes sp900769745	blast	91.1	None
RGVC236	GB_GCA_900770635.1	d__Bacteria;p__Bacteroidota;c__Bacteroidia;o__Bacteroidales;f__Rikenellaceae;g__Alistipes;s__Alistipes sp900770635	blast	92	iPHoP-RF;59.00
RGVC236	RS_GCF_006542665.1	d__Bacteria;p__Bacteroidota;c__Bacteroidia;o__Bacteroidales;f__Rikenellaceae;g__Alistipes;s__Alistipes communis	blast	90.7	iPHoP-RF;70.20
RGVC237	RS_GCF_003112755.1	d__Bacteria;p__Firmicutes_A;c__Clostridia;o__Oscillospirales;f__Oscillospiraceae;g__Lawsonibacter;s__Lawsonibacter asaccharolyticus	blast	92	None
RGVC240	RS_GCF_000012825.1	d__Bacteria;p__Bacteroidota;c__Bacteroidia;o__Bacteroidales;f__Bacteroidaceae;g__Phocaeicola;s__Phocaeicola vulgatus	blast	96.9	iPHoP-RF;82.80
RGVC240	GB_GCA_014385165.1	d__Bacteria;p__Bacteroidota;c__Bacteroidia;o__Bacteroidales;f__Bacteroidaceae;g__Bacteroides;s__Bacteroides sp014385165	iPHoP-RF	92.8	None
RGVC240	RS_GCF_013009555.1	d__Bacteria;p__Bacteroidota;c__Bacteroidia;o__Bacteroidales;f__Bacteroidaceae;g__Phocaeicola;s__Phocaeicola dorei	blast	92	iPHoP-RF;69.10
RGVC240	RS_GCF_900291465.1	d__Bacteria;p__Bacteroidota;c__Bacteroidia;o__Bacteroidales;f__Bacteroidaceae;g__CAG-462;s__CAG-462 sp900291465	blast	91.8	iPHoP-RF;70.20
RGVC240	GB_GCA_003489705.1	d__Bacteria;p__Bacteroidota;c__Bacteroidia;o__Bacteroidales;f__Bacteroidaceae;g__CAG-462;s__CAG-462 sp003489705	blast	91.7	None
RGVC240	GB_GCA_902388365.1	d__Bacteria;p__Bacteroidota;c__Bacteroidia;o__Bacteroidales;f__Bacteroidaceae;g__Phocaeicola;s__Phocaeicola sp902388365	blast	91.7	iPHoP-RF;76.60
RGVC240	GB_GCA_900765805.1	d__Bacteria;p__Bacteroidota;c__Bacteroidia;o__Bacteroidales;f__Bacteroidaceae;g__Bacteroides;s__Bacteroides sp900765805	iPHoP-RF	90.8	None
RGVC240	RS_GCF_000614185.1	d__Bacteria;p__Bacteroidota;c__Bacteroidia;o__Bacteroidales;f__Bacteroidaceae;g__Phocaeicola;s__Phocaeicola sartorii	blast	90.6	None
RGVC243	3300012889_29	d__Bacteria;p__Firmicutes_A;c__Clostridia;o__Oscillospirales;f__Oscillospiraceae;g__;s__	blast	94.3	iPHoP-RF;67.70
RGVC245	3300029583_30	d__Bacteria;p__Firmicutes_A;c__Clostridia;o__Oscillospirales;f__Oscillospiraceae;g__CAG-170;s__	blast	90	iPHoP-RF;54.90
RGVC245	GB_GCA_000432135.1	d__Bacteria;p__Firmicutes_A;c__Clostridia;o__Oscillospirales;f__Oscillospiraceae;g__CAG-170;s__CAG-170 sp000432135	blast	93.3	iPHoP-RF;65.10
RGVC245	GB_GCA_000436735.1	d__Bacteria;p__Firmicutes_A;c__Clostridia;o__Oscillospirales;f__Oscillospiraceae;g__CAG-170;s__CAG-170 sp000436735	blast	90.5	iPHoP-RF;52.00
RGVC245	GB_GCA_002404795.1	d__Bacteria;p__Firmicutes_A;c__Clostridia;o__Oscillospirales;f__Oscillospiraceae;g__CAG-170;s__CAG-170 sp002404795	blast	90.2	iPHoP-RF;62.50
RGVC245	GB_GCA_900545925.1	d__Bacteria;p__Firmicutes_A;c__Clostridia;o__Oscillospirales;f__Oscillospiraceae;g__CAG-170;s__CAG-170 sp900545925	blast	91	iPHoP-RF;64.50
RGVC246	GB_GCA_013316265.1	d__Bacteria;p__Firmicutes_A;c__Clostridia;o__Oscillospirales;f__Ruminococcaceae;g__Ruthenibacterium;s__Ruthenibacterium sp013316265	blast	92.1	iPHoP-RF;72.60
RGVC246	RS_GCF_000701665.1	d__Bacteria;p__Firmicutes_A;c__Clostridia;o__Oscillospirales;f__Butyricicoccaceae;g__Agathobaculum;s__Agathobaculum desmolans	blast	93.7	iPHoP-RF;60.10
RGVC249	GB_GCA_002320595.1	d__Bacteria;p__Firmicutes_A;c__Clostridia_A;o__Christensenellales;f__CAG-138;g__UBA1685;s__UBA1685 sp002320595	blast	96.9	None
RGVC250	3300010278_24	d__Bacteria;p__Firmicutes_A;c__Clostridia_A;o__Christensenellales;f__CAG-74;g__SFFH01;s__	blast	96.9	None
RGVC250	GB_GCA_004555535.1	d__Bacteria;p__Firmicutes_A;c__Clostridia_A;o__Christensenellales;f__CAG-74;g__SFFH01;s__SFFH01 sp004555535	blast	90.7	None
RGVC250	GB_GCA_900542395.1	d__Bacteria;p__Firmicutes_A;c__Clostridia_A;o__Christensenellales;f__CAG-74;g__SFFH01;s__SFFH01 sp900542395	blast	96.9	None
RGVC250	GB_GCA_900542445.1	d__Bacteria;p__Firmicutes_A;c__Clostridia_A;o__Christensenellales;f__CAG-74;g__SFFH01;s__SFFH01 sp900542445	blast	96.9	None
RGVC250	GB_GCA_900548125.1	d__Bacteria;p__Firmicutes_A;c__Clostridia_A;o__Christensenellales;f__CAG-74;g__SFFH01;s__SFFH01 sp900548125	blast	96.9	None
RGVC251	GB_GCA_902796915.1	d__Bacteria;p__Firmicutes_A;c__Clostridia;o__Oscillospirales;f__Acutalibacteraceae;g__RUG14215;s__RUG14215 sp902796915	blast	92.1	iPHoP-RF;63.00
RGVC251	RS_GCF_009696375.1	d__Bacteria;p__Firmicutes_A;c__Clostridia;o__Lachnospirales;f__Lachnospiraceae;g__Enterocloster;s__Enterocloster sp900540675	blast	91.8	None
RGVC252	RS_GCF_000403435.2	d__Bacteria;p__Firmicutes_A;c__Clostridia;o__Oscillospirales;f__Oscillospiraceae;g__Dysosmobacter;s__Dysosmobacter sp000403435	blast	90.7	iPHoP-RF;68.20
RGVC252	RS_GCF_005121165.1	d__Bacteria;p__Firmicutes_A;c__Clostridia;o__Oscillospirales;f__Oscillospiraceae;g__Dysosmobacter;s__Dysosmobacter welbionis	blast	92	iPHoP-RF;79.30
RGVC253	RS_GCF_000025305.1	d__Bacteria;p__Firmicutes_C;c__Negativicutes;o__Acidaminococcales;f__Acidaminococcaceae;g__Acidaminococcus;s__Acidaminococcus fermentans	blast	96.5	iPHoP-RF;74.80
RGVC253	RS_GCF_009696675.1	d__Bacteria;p__Firmicutes_C;c__Negativicutes;o__Acidaminococcales;f__Acidaminococcaceae;g__Acidaminococcus;s__Acidaminococcus sp000437815	blast	96.2	iPHoP-RF;75.20
RGVC253	RS_GCF_900095825.1	d__Bacteria;p__Firmicutes_C;c__Negativicutes;o__Acidaminococcales;f__Acidaminococcaceae;g__Acidaminococcus;s__Acidaminococcus massiliensis	blast	92.4	iPHoP-RF;67.30
RGVC254	GB_GCA_014385105.1	d__Bacteria;p__Firmicutes_A;c__Clostridia;o__UMGS1810;f__UMGS1810;g__NSJ-50;s__NSJ-50 sp014385105	blast	90.5	None
RGVC256	GB_GCA_000432895.1	d__Bacteria;p__Firmicutes;c__Bacilli;o__RFN20;f__CAG-449;g__CAG-449;s__CAG-449 sp000432895	blast	90.6	None
RGVC256	GB_GCA_900551385.1	d__Bacteria;p__Firmicutes;c__Bacilli;o__RFN20;f__CAG-449;g__CAG-449;s__CAG-449 sp900551385	blast	90.8	None
RGVC257	GB_GCA_900541835.1	d__Bacteria;p__Bacteroidota;c__Bacteroidia;o__Bacteroidales;f__Muribaculaceae;g__CAG-485;s__CAG-485 sp900541835	blast	94.8	iPHoP-RF;60.90
RGVC257	GB_GCA_000437495.1	d__Bacteria;p__Bacteroidota;c__Bacteroidia;o__Bacteroidales;f__Muribaculaceae;g__CAG-485;s__CAG-485 sp000437495	blast	90.3	iPHoP-RF;51.20
RGVC260	RS_GCF_008727735.1	d__Bacteria;p__Firmicutes_A;c__Clostridia;o__Oscillospirales;f__Oscillospiraceae;g__Lawsonibacter;s__Lawsonibacter sp000177015	blast	92	None
RGVC263	3300027796_72	d__Bacteria;p__Firmicutes;c__Bacilli;o__RF39;f__UBA660;g__UBA5026;s__	blast	91.9	None
RGVC264	GB_GCA_002395775.1	d__Bacteria;p__Bacteroidota;c__Bacteroidia;o__Bacteroidales;f__Bacteroidaceae;g__UBA4372;s__UBA4372 sp002395775	blast	91.2	None
RGVC267	RS_GCF_003478995.1	d__Bacteria;p__Firmicutes_A;c__Clostridia;o__Oscillospirales;f__Oscillospiraceae;g__Lawsonibacter;s__Lawsonibacter sp003478995	blast	90	iPHoP-RF;77.30
RGVC267	RS_GCF_003573975.1	d__Bacteria;p__Firmicutes_A;c__Clostridia;o__Oscillospirales;f__Oscillospiraceae;g__Lawsonibacter;s__Lawsonibacter sp900066825	blast	92	iPHoP-RF;61.70
RGVC268	GB_GCA_000434215.1	d__Bacteria;p__Bacteroidota;c__Bacteroidia;o__Bacteroidales;f__UBA11471;g__UBA11471;s__UBA11471 sp000434215	iPHoP-RF	92.1	blast;89.90
RGVC268	GB_GCA_900542765.1	d__Bacteria;p__Bacteroidota;c__Bacteroidia;o__Bacteroidales;f__UBA11471;g__UBA11471;s__UBA11471 sp900542765	iPHoP-RF	96.4	blast;90.70
RGVC268	GB_GCA_900545915.1	d__Bacteria;p__Bacteroidota;c__Bacteroidia;o__Bacteroidales;f__Coprobacteraceae;g__Coprobacter;s__Coprobacter sp900545915	iPHoP-RF	95.4	blast;90.50
RGVC268	GB_GCA_900547555.1	d__Bacteria;p__Bacteroidota;c__Bacteroidia;o__Bacteroidales;f__UBA11471;g__UBA11471;s__UBA11471 sp900547555	blast	92.2	iPHoP-RF;90.50
RGVC268	RS_GCF_000155815.1	d__Bacteria;p__Bacteroidota;c__Bacteroidia;o__Bacteroidales;f__Bacteroidaceae;g__Bacteroides;s__Bacteroides eggerthii	iPHoP-RF	92.8	None
RGVC268	RS_GCF_000296465.1	d__Bacteria;p__Bacteroidota;c__Bacteroidia;o__Bacteroidales;f__Barnesiellaceae;g__Barnesiella;s__Barnesiella intestinihominis	blast	91.3	iPHoP-RF;81.40
RGVC268	RS_GCF_900129655.1	d__Bacteria;p__Bacteroidota;c__Bacteroidia;o__Bacteroidales;f__Bacteroidaceae;g__Bacteroides;s__Bacteroides clarus	iPHoP-RF	92.1	None
RGVC269	3300010270_12	d__Bacteria;p__Bacteroidota;c__Bacteroidia;o__Bacteroidales;f__Bacteroidaceae;g__;s__	blast	90.2	iPHoP-RF;50.20
RGVC269	GB_GCA_902388365.1	d__Bacteria;p__Bacteroidota;c__Bacteroidia;o__Bacteroidales;f__Bacteroidaceae;g__Phocaeicola;s__Phocaeicola sp902388365	blast	91.8	iPHoP-RF;88.50
RGVC269	RS_GCF_003437535.1	d__Bacteria;p__Bacteroidota;c__Bacteroidia;o__Bacteroidales;f__Bacteroidaceae;g__Phocaeicola;s__Phocaeicola plebeius_A	blast	90.2	iPHoP-RF;68.00
RGVC270	RS_GCF_900199495.1	d__Bacteria;p__Firmicutes_A;c__Clostridia;o__Oscillospirales;f__Oscillospiraceae;g__An92;s__An92 sp900199495	blast	92.7	None
RGVC271	RS_GCF_000225345.1	d__Bacteria;p__Firmicutes_A;c__Clostridia;o__Lachnospirales;f__Lachnospiraceae;g__Roseburia;s__Roseburia hominis	blast	92.8	None
RGVC272	RS_GCF_002910915.1	d__Bacteria;p__Actinobacteriota;c__Actinomycetia;o__Streptomycetales;f__Streptomycetaceae;g__Streptomyces;s__Streptomyces sp002910915	blast	96.8	None
RGVC272	RS_GCF_003121295.1	d__Bacteria;p__Actinobacteriota;c__Actinomycetia;o__Streptomycetales;f__Streptomycetaceae;g__Streptomyces;s__Streptomyces orinoci	blast	90.4	None
RGVC276	GB_GCA_002315505.1	d__Bacteria;p__Firmicutes_A;c__Clostridia;o__Oscillospirales;f__Acutalibacteraceae;g__CAG-488;s__CAG-488 sp002315505	blast	96.9	iPHoP-RF;57.60
RGVC276	GB_GCA_000434055.1	d__Bacteria;p__Firmicutes_A;c__Clostridia;o__Oscillospirales;f__Acutalibacteraceae;g__CAG-488;s__CAG-488 sp000434055	blast	93.7	None
RGVC276	GB_GCA_000434915.1	d__Bacteria;p__Firmicutes_A;c__Clostridia;o__Oscillospirales;f__Acutalibacteraceae;g__CAG-488;s__CAG-488 sp000434915	blast	93	None
RGVC277	3300012983_37	d__Bacteria;p__Bacteroidota;c__Bacteroidia;o__Bacteroidales;f__Rikenellaceae;g__Alistipes;s__	blast	95.1	iPHoP-RF;75.70
RGVC277	GB_GCA_900769405.1	d__Bacteria;p__Bacteroidota;c__Bacteroidia;o__Bacteroidales;f__Rikenellaceae;g__Alistipes;s__Alistipes sp900769405	blast	94.9	iPHoP-RF;77.10
RGVC278	GB_GCA_004556545.1	d__Bacteria;p__Firmicutes_A;c__Clostridia_A;o__Christensenellales;f__CAG-74;g__Firm-11;s__Firm-11 sp004556545	blast	91.9	iPHoP-RF;65.10
RGVC278	GB_GCA_900540045.1	d__Bacteria;p__Firmicutes_A;c__Clostridia_A;o__Christensenellales;f__CAG-74;g__Firm-11;s__Firm-11 sp900540045	blast	95.3	iPHoP-RF;71.90
RGVC279	GB_GCA_902791425.1	d__Bacteria;p__Firmicutes_A;c__Clostridia;o__Monoglobales;f__Monoglobaceae;g__UMGS1820;s__UMGS1820 sp902791425	blast	92	iPHoP-RF;65.30
RGVC280	RS_GCF_003573975.1	d__Bacteria;p__Firmicutes_A;c__Clostridia;o__Oscillospirales;f__Oscillospiraceae;g__Lawsonibacter;s__Lawsonibacter sp900066825	blast	91.9	None
RGVC281	GB_GCA_003539515.1	d__Bacteria;p__Firmicutes_A;c__Clostridia_A;o__Christensenellales;f__CAG-917;g__CAG-349;s__CAG-349 sp003539515	blast	91.7	iPHoP-RF;52.80
RGVC282	GB_GCA_002437585.1	d__Bacteria;p__Firmicutes_A;c__Clostridia;o__Oscillospirales;f__Oscillospiraceae;g__CAG-110;s__CAG-110 sp002437585	blast	93.2	iPHoP-RF;73.00
RGVC282	GB_GCA_000434635.1	d__Bacteria;p__Firmicutes_A;c__Clostridia;o__Oscillospirales;f__Oscillospiraceae;g__CAG-110;s__CAG-110 sp000434635	blast	92.8	iPHoP-RF;75.70
RGVC282	GB_GCA_900762245.1	d__Bacteria;p__Firmicutes_A;c__Clostridia;o__Oscillospirales;f__Oscillospiraceae;g__CAG-110;s__CAG-110 sp900762245	blast	92.1	iPHoP-RF;75.00
RGVC282	GB_GCA_002362625.1	d__Bacteria;p__Firmicutes_A;c__Clostridia;o__Oscillospirales;f__Oscillospiraceae;g__CAG-110;s__CAG-110 sp002362625	blast	92	iPHoP-RF;71.70
RGVC282	GB_GCA_002493965.1	d__Bacteria;p__Firmicutes_A;c__Clostridia;o__Oscillospirales;f__Oscillospiraceae;g__CAG-110;s__CAG-110 sp002493965	blast	92	iPHoP-RF;69.30
RGVC282	GB_GCA_900546075.1	d__Bacteria;p__Firmicutes_A;c__Clostridia;o__Oscillospirales;f__Oscillospiraceae;g__CAG-110;s__CAG-110 sp900546075	blast	92	iPHoP-RF;80.00
RGVC282	3300010259_5	d__Bacteria;p__Firmicutes_A;c__Clostridia;o__Oscillospirales;f__Oscillospiraceae;g__CAG-110;s__	blast	91.9	iPHoP-RF;52.80
RGVC282	3300010280_27	d__Bacteria;p__Firmicutes_A;c__Clostridia;o__Oscillospirales;f__Oscillospiraceae;g__CAG-110;s__	blast	91.9	iPHoP-RF;64.30
RGVC282	GB_GCA_900540635.1	d__Bacteria;p__Firmicutes_A;c__Clostridia;o__Oscillospirales;f__Oscillospiraceae;g__CAG-110;s__CAG-110 sp900540635	blast	91.9	None
RGVC282	GB_GCA_900547405.1	d__Bacteria;p__Firmicutes_A;c__Clostridia;o__Oscillospirales;f__Oscillospiraceae;g__CAG-110;s__CAG-110 sp900547405	blast	91.9	iPHoP-RF;60.10
RGVC282	GB_GCA_900553805.1	d__Bacteria;p__Firmicutes_A;c__Clostridia;o__Oscillospirales;f__Oscillospiraceae;g__CAG-110;s__CAG-110 sp900553805	blast	91.9	iPHoP-RF;61.10
RGVC282	GB_GCA_900769845.1	d__Bacteria;p__Firmicutes_A;c__Clostridia;o__Oscillospirales;f__Oscillospiraceae;g__CAG-110;s__CAG-110 sp900769845	blast	91.9	iPHoP-RF;68.90
RGVC282	GB_GCA_900770015.1	d__Bacteria;p__Firmicutes_A;c__Clostridia;o__Oscillospirales;f__Oscillospiraceae;g__CAG-110;s__CAG-110 sp900770015	blast	91.9	None
RGVC282	GB_GCA_004555705.1	d__Bacteria;p__Firmicutes_A;c__Clostridia;o__Oscillospirales;f__Oscillospiraceae;g__CAG-110;s__CAG-110 sp004555705	blast	91.8	iPHoP-RF;73.50
RGVC282	GB_GCA_900549495.1	d__Bacteria;p__Firmicutes_A;c__Clostridia;o__Oscillospirales;f__Oscillospiraceae;g__CAG-110;s__CAG-110 sp900549495	blast	91.8	iPHoP-RF;71.70
RGVC282	GB_GCA_900556935.1	d__Bacteria;p__Firmicutes_A;c__Clostridia;o__Oscillospirales;f__Oscillospiraceae;g__CAG-110;s__CAG-110 sp900556935	blast	91.8	iPHoP-RF;65.30
RGVC282	GB_GCA_900763965.1	d__Bacteria;p__Firmicutes_A;c__Clostridia;o__Oscillospirales;f__Oscillospiraceae;g__CAG-110;s__CAG-110 sp900763965	blast	91.8	iPHoP-RF;67.70
RGVC282	GB_GCA_900544405.1	d__Bacteria;p__Firmicutes_A;c__Clostridia;o__Oscillospirales;f__Oscillospiraceae;g__CAG-110;s__CAG-110 sp900544405	blast	91.7	None
RGVC282	GB_GCA_900549705.1	d__Bacteria;p__Firmicutes_A;c__Clostridia;o__Oscillospirales;f__Oscillospiraceae;g__CAG-110;s__CAG-110 sp900549705	blast	91.7	iPHoP-RF;77.30
RGVC282	GB_GCA_900762935.1	d__Bacteria;p__Firmicutes_A;c__Clostridia;o__Oscillospirales;f__Oscillospiraceae;g__CAG-110;s__CAG-110 sp900762935	blast	91.7	iPHoP-RF;58.20
RGVC282	GB_GCA_002436765.1	d__Bacteria;p__Firmicutes_A;c__Clostridia;o__Oscillospirales;f__Oscillospiraceae;g__CAG-110;s__CAG-110 sp002436765	blast	91.6	iPHoP-RF;77.50
RGVC282	GB_GCA_900544945.1	d__Bacteria;p__Firmicutes_A;c__Clostridia;o__Oscillospirales;f__Oscillospiraceae;g__CAG-110;s__CAG-110 sp900544945	blast	90.8	iPHoP-RF;74.10
RGVC284	3300022753_56	d__Bacteria;p__Firmicutes_A;c__Clostridia;o__Oscillospirales;f__Oscillospiraceae;g__;s__	blast	96.3	iPHoP-RF;68.90
RGVC285	GB_GCA_002320595.1	d__Bacteria;p__Firmicutes_A;c__Clostridia_A;o__Christensenellales;f__CAG-138;g__UBA1685;s__UBA1685 sp002320595	blast	96.9	None
RGVC286	3300010278_23	d__Bacteria;p__Firmicutes_A;c__Clostridia;o__Oscillospirales;f__Oscillospiraceae;g__Dysosmobacter;s__	blast	90.8	iPHoP-RF;64.80
RGVC286	3300010279_14	d__Bacteria;p__Firmicutes_A;c__Clostridia;o__Oscillospirales;f__Oscillospiraceae;g__Lawsonibacter;s__	blast	91.7	iPHoP-RF;55.70
RGVC286	GB_GCA_004558115.1	d__Bacteria;p__Firmicutes_A;c__Clostridia;o__Oscillospirales;f__Oscillospiraceae;g__Dysosmobacter;s__Dysosmobacter sp004558115	blast	90.7	iPHoP-RF;72.40
RGVC286	GB_GCA_900770295.1	d__Bacteria;p__Firmicutes_A;c__Clostridia;o__Oscillospirales;f__Oscillospiraceae;g__Dysosmobacter;s__Dysosmobacter sp900770295	blast	91.4	iPHoP-RF;74.30
RGVC289	GB_GCA_002438865.1	d__Bacteria;p__Firmicutes_A;c__Clostridia;o__Monoglobales_A;f__UBA1381;g__UBA4716;s__UBA4716 sp002438865	blast	93.4	iPHoP-RF;59.20
RGVC290	RS_GCF_900104665.1	d__Bacteria;p__Firmicutes;c__Bacilli;o__Erysipelotrichales;f__Erysipelotrichaceae;g__Traorella;s__Traorella massiliensis	blast	91.1	None
RGVC292	GB_GCA_004553625.1	d__Bacteria;p__Firmicutes_A;c__Clostridia;o__Oscillospirales;f__Oscillospiraceae;g__UBA5446;s__UBA5446 sp004553625	blast	90.8	None
RGVC295	GB_GCA_003539495.1	d__Bacteria;p__Firmicutes_A;c__Clostridia;o__Oscillospirales;f__Oscillospiraceae;g__CAG-83;s__CAG-83 sp003539495	blast	92.1	iPHoP-RF;62.70
RGVC295	GB_GCA_902388735.1	d__Bacteria;p__Firmicutes_A;c__Clostridia;o__Oscillospirales;f__Oscillospiraceae;g__CAG-83;s__CAG-83 sp902388735	blast	91.7	iPHoP-RF;70.20
RGVC296	GB_GCA_000432135.1	d__Bacteria;p__Firmicutes_A;c__Clostridia;o__Oscillospirales;f__Oscillospiraceae;g__CAG-170;s__CAG-170 sp000432135	blast	94.9	iPHoP-RF;68.00
RGVC296	GB_GCA_003516765.1	d__Bacteria;p__Firmicutes_A;c__Clostridia;o__Oscillospirales;f__Oscillospiraceae;g__CAG-170;s__CAG-170 sp003516765	blast	91.2	iPHoP-RF;75.70
RGVC296	GB_GCA_900545925.1	d__Bacteria;p__Firmicutes_A;c__Clostridia;o__Oscillospirales;f__Oscillospiraceae;g__CAG-170;s__CAG-170 sp900545925	blast	93.8	iPHoP-RF;70.20
RGVC296	GB_GCA_900549635.1	d__Bacteria;p__Firmicutes_A;c__Clostridia;o__Oscillospirales;f__Oscillospiraceae;g__CAG-170;s__CAG-170 sp900549635	blast	91	iPHoP-RF;57.60
RGVC296	GB_GCA_900556635.1	d__Bacteria;p__Firmicutes_A;c__Clostridia;o__Oscillospirales;f__Oscillospiraceae;g__CAG-170;s__CAG-170 sp900556635	blast	93.4	iPHoP-RF;69.30
RGVC296	GB_GCA_900751035.1	d__Bacteria;p__Firmicutes_A;c__Clostridia;o__Oscillospirales;f__Oscillospiraceae;g__CAG-170;s__CAG-170 sp900751035	blast	92.6	iPHoP-RF;68.60
RGVC297	GB_GCA_003150515.1	d__Bacteria;p__Firmicutes_A;c__Clostridia_A;o__Christensenellales;f__QALW01;g__QALW01;s__QALW01 sp003150515	blast	90	iPHoP-RF;54.40
RGVC297	GB_GCA_900551745.1	d__Bacteria;p__Firmicutes_C;c__Negativicutes;o__Acidaminococcales;f__Acidaminococcaceae;g__Phascolarctobacterium;s__Phascolarctobacterium sp900551745	blast	91.7	None
RGVC298	GB_GCA_004554085.1	d__Bacteria;p__Firmicutes_A;c__Clostridia_A;o__Christensenellales;f__CAG-74;g__SFTH01;s__SFTH01 sp004554085	blast	91.9	None
RGVC298	GB_GCA_004563405.1	d__Bacteria;p__Firmicutes_A;c__Clostridia_A;o__Christensenellales;f__CAG-74;g__SFTH01;s__SFTH01 sp004563405	blast	90	None
RGVC300	GB_GCA_000435055.1	d__Bacteria;p__Firmicutes_A;c__Clostridia_A;o__Christensenellales;f__CAG-138;g__PeH17;s__PeH17 sp000435055	blast	91.7	None
RGVC303	RS_GCF_000012825.1	d__Bacteria;p__Bacteroidota;c__Bacteroidia;o__Bacteroidales;f__Bacteroidaceae;g__Phocaeicola;s__Phocaeicola vulgatus	CRISPR	98.6	iPHoP-RF;84.50
RGVC303	RS_GCF_000154205.1	d__Bacteria;p__Bacteroidota;c__Bacteroidia;o__Bacteroidales;f__Bacteroidaceae;g__Bacteroides;s__Bacteroides uniformis	CRISPR	97	iPHoP-RF;95.40 blast;91.90
RGVC303	RS_GCF_000154525.1	d__Bacteria;p__Bacteroidota;c__Bacteroidia;o__Bacteroidales;f__Bacteroidaceae;g__Bacteroides;s__Bacteroides stercoris	blast	96.9	iPHoP-RF;83.60
RGVC303	GB_GCA_900544675.1	d__Bacteria;p__Bacteroidota;c__Bacteroidia;o__Bacteroidales;f__Bacteroidaceae;g__Phocaeicola;s__Phocaeicola sp900544675	CRISPR	93.9	None
RGVC303	3300029706_6	d__Bacteria;p__Bacteroidota;c__Bacteroidia;o__Bacteroidales;f__Bacteroidaceae;g__Bacteroides;s__	iPHoP-RF	93.7	None
RGVC303	RS_GCF_000614125.1	d__Bacteria;p__Bacteroidota;c__Bacteroidia;o__Bacteroidales;f__Bacteroidaceae;g__Bacteroides;s__Bacteroides rodentium	iPHoP-RF	92.8	None
RGVC305	RS_GCF_000403495.2	d__Bacteria;p__Firmicutes_A;c__Clostridia;o__Lachnospirales;f__Lachnospiraceae;g__CAG-95;s__CAG-95 sp000403495	blast	92.6	None
RGVC306	GB_GCA_000431795.1	d__Bacteria;p__Firmicutes;c__Bacilli;o__RF39;f__UBA660;g__CAG-302;s__CAG-302 sp000431795	blast	96.8	None
RGVC306	GB_GCA_001916775.1	d__Bacteria;p__Firmicutes;c__Bacilli;o__RF39;f__UBA660;g__CAG-302;s__CAG-302 sp001916775	blast	91.7	None
RGVC307	RS_GCF_000382445.1	d__Bacteria;p__Bacteroidota;c__Bacteroidia;o__Bacteroidales;f__Bacteroidaceae;g__Phocaeicola;s__Phocaeicola massiliensis	blast	96.8	iPHoP-RF;75.20
RGVC307	GB_GCA_900755095.1	d__Bacteria;p__Bacteroidota;c__Bacteroidia;o__Bacteroidales;f__Bacteroidaceae;g__Bacteroides;s__Bacteroides sp900755095	iPHoP-RF	96.7	None
RGVC307	RS_GCF_000012825.1	d__Bacteria;p__Bacteroidota;c__Bacteroidia;o__Bacteroidales;f__Bacteroidaceae;g__Phocaeicola;s__Phocaeicola vulgatus	blast	96.7	iPHoP-RF;87.90
RGVC307	RS_GCF_903181435.1	d__Bacteria;p__Bacteroidota;c__Bacteroidia;o__Bacteroidales;f__Bacteroidaceae;g__Bacteroides;s__Bacteroides acidifaciens_A	iPHoP-RF	96.7	None
RGVC307	RS_GCF_000156195.1	d__Bacteria;p__Bacteroidota;c__Bacteroidia;o__Bacteroidales;f__Bacteroidaceae;g__Bacteroides;s__Bacteroides finegoldii	iPHoP-RF	96.4	blast;90.00
RGVC307	RS_GCF_000613385.1	d__Bacteria;p__Bacteroidota;c__Bacteroidia;o__Bacteroidales;f__Bacteroidaceae;g__Bacteroides;s__Bacteroides acidifaciens	iPHoP-RF	96.1	None
RGVC307	RS_GCF_002222615.2	d__Bacteria;p__Bacteroidota;c__Bacteroidia;o__Bacteroidales;f__Bacteroidaceae;g__Bacteroides;s__Bacteroides caccae	iPHoP-RF	96.1	blast;90.50
RGVC307	RS_GCF_009193325.2	d__Bacteria;p__Bacteroidota;c__Bacteroidia;o__Bacteroidales;f__Bacteroidaceae;g__Bacteroides;s__Bacteroides sp900066265	iPHoP-RF	96.1	None
RGVC307	RS_GCF_009193295.2	d__Bacteria;p__Bacteroidota;c__Bacteroidia;o__Bacteroidales;f__Bacteroidaceae;g__Bacteroides;s__Bacteroides sp007097645	iPHoP-RF	95.7	None
RGVC307	GB_GCA_900556625.1	d__Bacteria;p__Bacteroidota;c__Bacteroidia;o__Bacteroidales;f__Bacteroidaceae;g__Bacteroides;s__Bacteroides sp900556625	iPHoP-RF	95.4	None
RGVC307	RS_GCF_001688725.2	d__Bacteria;p__Bacteroidota;c__Bacteroidia;o__Bacteroidales;f__Bacteroidaceae;g__Bacteroides;s__Bacteroides caecimuris	iPHoP-RF	95.4	blast;90.00
RGVC307	GB_GCA_900761785.1	d__Bacteria;p__Bacteroidota;c__Bacteroidia;o__Bacteroidales;f__Bacteroidaceae;g__Bacteroides;s__Bacteroides sp900761785	iPHoP-RF	95.1	None
RGVC307	GB_GCA_900554435.1	d__Bacteria;p__Bacteroidota;c__Bacteroidia;o__Bacteroidales;f__Bacteroidaceae;g__Phocaeicola;s__Phocaeicola sp900554435	blast	94.8	iPHoP-RF;72.40
RGVC307	RS_GCF_014334015.1	d__Bacteria;p__Bacteroidota;c__Bacteroidia;o__Bacteroidales;f__Bacteroidaceae;g__Bacteroides;s__Bacteroides sp003463205	iPHoP-RF	94.1	None
RGVC307	RS_GCF_900106755.1	d__Bacteria;p__Bacteroidota;c__Bacteroidia;o__Bacteroidales;f__Bacteroidaceae;g__Bacteroides;s__Bacteroides faecis	iPHoP-RF	93.7	None
RGVC307	RS_GCF_013009555.1	d__Bacteria;p__Bacteroidota;c__Bacteroidia;o__Bacteroidales;f__Bacteroidaceae;g__Phocaeicola;s__Phocaeicola dorei	blast	93.6	iPHoP-RF;78.00
RGVC307	RS_GCF_000011065.1	d__Bacteria;p__Bacteroidota;c__Bacteroidia;o__Bacteroidales;f__Bacteroidaceae;g__Bacteroides;s__Bacteroides thetaiotaomicron	iPHoP-RF	93.4	blast;92.60
RGVC307	RS_GCF_902362375.1	d__Bacteria;p__Bacteroidota;c__Bacteroidia;o__Bacteroidales;f__Bacteroidaceae;g__Bacteroides;s__Bacteroides sp902362375	iPHoP-RF	93.4	None
RGVC307	RS_GCF_900155865.1	d__Bacteria;p__Bacteroidota;c__Bacteroidia;o__Bacteroidales;f__Bacteroidaceae;g__Bacteroides;s__Bacteroides bouchesdurhonensis	iPHoP-RF	92.8	blast;90.80
RGVC307	RS_GCF_001314995.1	d__Bacteria;p__Bacteroidota;c__Bacteroidia;o__Bacteroidales;f__Bacteroidaceae;g__Bacteroides;s__Bacteroides ovatus	iPHoP-RF	92.1	blast;91.00
RGVC307	RS_GCF_000614185.1	d__Bacteria;p__Bacteroidota;c__Bacteroidia;o__Bacteroidales;f__Bacteroidaceae;g__Phocaeicola;s__Phocaeicola sartorii	blast	92	iPHoP-RF;77.80
RGVC309	GB_GCA_900553675.1	d__Bacteria;p__Firmicutes_A;c__Clostridia;o__Oscillospirales;f__Ruminococcaceae;g__UBA1409;s__UBA1409 sp900553675	blast	91.6	None
RGVC309	RS_GCF_900760125.1	d__Bacteria;p__Firmicutes_A;c__Clostridia;o__Oscillospirales;f__Ruminococcaceae;g__UBA1409;s__UBA1409 sp900760125	blast	91.7	None
RGVC310	GB_GCA_001874145.1	d__Bacteria;p__Bacteroidota;c__Bacteroidia;o__Flavobacteriales;f__Flavobacteriaceae;g__Lacinutrix;s__Lacinutrix sp001874145	iPHoP-RF	90.8	None
RGVC310	RS_GCF_000211855.2	d__Bacteria;p__Bacteroidota;c__Bacteroidia;o__Flavobacteriales;f__Flavobacteriaceae;g__Lacinutrix;s__Lacinutrix sp000211855	iPHoP-RF	90.5	None
RGVC310	RS_GCF_000518485.1	d__Bacteria;p__Bacteroidota;c__Bacteroidia;o__Flavobacteriales;f__Flavobacteriaceae;g__Olleya;s__Olleya marilimosa	iPHoP-RF	91.1	None
RGVC310	RS_GCF_000789235.1	d__Bacteria;p__Bacteroidota;c__Bacteroidia;o__Flavobacteriales;f__Flavobacteriaceae;g__Flaviramulus_A;s__Flaviramulus_A ichthyoenteri	iPHoP-RF	90.5	None
RGVC310	RS_GCF_002741945.1	d__Bacteria;p__Bacteroidota;c__Bacteroidia;o__Flavobacteriales;f__Flavobacteriaceae;g__Flaviramulus_A;s__Flaviramulus_A sp002741945	iPHoP-RF	94.7	None
RGVC310	RS_GCF_008033385.1	d__Bacteria;p__Bacteroidota;c__Bacteroidia;o__Flavobacteriales;f__Flavobacteriaceae;g__Algibacter;s__Algibacter sp008033385	iPHoP-RF	91.1	None
RGVC310	RS_GCF_014202225.1	d__Bacteria;p__Bacteroidota;c__Bacteroidia;o__Flavobacteriales;f__Flavobacteriaceae;g__Algibacter_B;s__Algibacter_B amylolyticus	iPHoP-RF	92.1	None
RGVC310	RS_GCF_900112595.1	d__Bacteria;p__Bacteroidota;c__Bacteroidia;o__Flavobacteriales;f__Flavobacteriaceae;g__Algibacter_B;s__Algibacter_B pectinivorans	iPHoP-RF	92.1	None
RGVC311	3300022753_111	d__Bacteria;p__Bacteroidota;c__Bacteroidia;o__Bacteroidales;f__Rikenellaceae;g__Alistipes;s__	blast	96.9	iPHoP-RF;56.80
RGVC311	GB_GCA_900770635.1	d__Bacteria;p__Bacteroidota;c__Bacteroidia;o__Bacteroidales;f__Rikenellaceae;g__Alistipes;s__Alistipes sp900770635	blast	94.8	iPHoP-RF;58.70
RGVC311	GB_GCA_900768045.1	d__Bacteria;p__Bacteroidota;c__Bacteroidia;o__Bacteroidales;f__Rikenellaceae;g__Alistipes;s__Alistipes sp900768045	blast	93.7	iPHoP-RF;55.40
RGVC311	GB_GCA_900768015.1	d__Bacteria;p__Bacteroidota;c__Bacteroidia;o__Bacteroidales;f__Rikenellaceae;g__Alistipes;s__Alistipes sp900768015	blast	92.1	None
RGVC311	3300018878_209	d__Bacteria;p__Bacteroidota;c__Bacteroidia;o__Bacteroidales;f__Rikenellaceae;g__Alistipes;s__	blast	90.6	None
RGVC312	3300012889_34	d__Bacteria;p__Firmicutes_A;c__Clostridia;o__Oscillospirales;f__Butyricicoccaceae;g__;s__	blast	91.8	None
RGVC312	GB_GCA_002405755.1	d__Bacteria;p__Firmicutes_A;c__Clostridia;o__Oscillospirales;f__Butyricicoccaceae;g__UBA4644;s__UBA4644 sp002405755	blast	93.9	None
RGVC312	GB_GCA_900555855.1	d__Bacteria;p__Firmicutes_A;c__Clostridia;o__Oscillospirales;f__Butyricicoccaceae;g__UBA4644;s__UBA4644 sp900555855	blast	90.6	None
RGVC313	GB_GCA_900553855.1	d__Bacteria;p__Firmicutes;c__Bacilli;o__RF39;f__UBA660;g__CAG-533;s__CAG-533 sp900553855	blast	91.7	iPHoP-RF;60.90
RGVC314	3300013901_4	d__Bacteria;p__Firmicutes_A;c__Clostridia_A;o__Christensenellales;f__CAG-917;g__CAG-475;s__	blast	92.2	iPHoP-RF;80.30
RGVC314	GB_GCA_000434435.1	d__Bacteria;p__Firmicutes_A;c__Clostridia_A;o__Christensenellales;f__CAG-917;g__CAG-475;s__CAG-475 sp000434435	blast	96.1	iPHoP-RF;83.30
RGVC314	GB_GCA_002449145.1	d__Bacteria;p__Firmicutes_A;c__Clostridia_A;o__Christensenellales;f__CAG-917;g__CAG-475;s__CAG-475 sp002449145	blast	95.6	iPHoP-RF;79.30
RGVC314	GB_GCA_900547975.1	d__Bacteria;p__Firmicutes_A;c__Clostridia_A;o__Christensenellales;f__CAG-917;g__CAG-475;s__CAG-475 sp900547975	blast	93.6	iPHoP-RF;83.10
RGVC315	GB_GCA_900557155.1	d__Bacteria;p__Firmicutes_A;c__Clostridia;o__Oscillospirales;f__Ruminococcaceae;g__UBA3818;s__UBA3818 sp900557155	blast	91.6	iPHoP-RF;51.70
RGVC316	GB_GCA_013316265.1	d__Bacteria;p__Firmicutes_A;c__Clostridia;o__Oscillospirales;f__Ruminococcaceae;g__Ruthenibacterium;s__Ruthenibacterium sp013316265	blast	91.4	iPHoP-RF;71.50
RGVC316	RS_GCF_000701665.1	d__Bacteria;p__Firmicutes_A;c__Clostridia;o__Oscillospirales;f__Butyricicoccaceae;g__Agathobaculum;s__Agathobaculum desmolans	blast	92	iPHoP-RF;58.20
RGVC317	3300018475_152	d__Bacteria;p__Firmicutes_A;c__Clostridia;o__Oscillospirales;f__;g__;s__	blast	96.9	iPHoP-RF;69.30
RGVC318	GB_GCA_000435555.1	d__Bacteria;p__Firmicutes_A;c__Clostridia;o__Oscillospirales;f__Oscillospiraceae;g__CAG-83;s__CAG-83 sp000435555	blast	90.9	None
RGVC318	GB_GCA_003487665.1	d__Bacteria;p__Firmicutes_A;c__Clostridia;o__Oscillospirales;f__Oscillospiraceae;g__CAG-83;s__CAG-83 sp003487665	blast	90.1	None
RGVC318	GB_GCA_900549475.1	d__Bacteria;p__Firmicutes_A;c__Clostridia;o__Oscillospirales;f__Oscillospiraceae;g__UMGS1872;s__UMGS1872 sp900549475	blast	92	None
RGVC318	GB_GCA_902373635.1	d__Bacteria;p__Firmicutes_A;c__Clostridia;o__Oscillospirales;f__Oscillospiraceae;g__UMGS1872;s__UMGS1872 sp902373635	blast	92	iPHoP-RF;53.80
RGVC319	3300010280_19	d__Bacteria;p__Firmicutes_A;c__Clostridia;o__Lachnospirales;f__Lachnospiraceae;g__Blautia_A;s__	blast	91.9	CRISPR;88.00 iPHoP-RF;70.60
RGVC319	GB_GCA_900541985.1	d__Bacteria;p__Firmicutes_A;c__Clostridia;o__Lachnospirales;f__Lachnospiraceae;g__Blautia_A;s__Blautia_A sp900541985	blast	93.7	iPHoP-RF;70.60
RGVC319	GB_GCA_900553515.1	d__Bacteria;p__Firmicutes_A;c__Clostridia;o__Lachnospirales;f__Lachnospiraceae;g__Blautia_A;s__Blautia_A sp900553515	CRISPR	92.6	blast;76.30 iPHoP-RF;59.50
RGVC321	RS_GCF_000492175.1	d__Bacteria;p__Firmicutes_A;c__Clostridia;o__Oscillospirales;f__Oscillospiraceae;g__Lawsonibacter;s__Lawsonibacter sp000492175	blast	93.9	None
RGVC321	RS_GCF_002910915.1	d__Bacteria;p__Actinobacteriota;c__Actinomycetia;o__Streptomycetales;f__Streptomycetaceae;g__Streptomyces;s__Streptomyces sp002910915	blast	96	None
RGVC322	3300006428_5	d__Bacteria;p__Firmicutes_A;c__Clostridia;o__Oscillospirales;f__Oscillospiraceae;g__Oscillibacter;s__	blast	91.3	iPHoP-RF;59.50
RGVC322	3300010278_23	d__Bacteria;p__Firmicutes_A;c__Clostridia;o__Oscillospirales;f__Oscillospiraceae;g__Dysosmobacter;s__	blast	91.3	iPHoP-RF;77.50
RGVC322	3300012889_21	d__Bacteria;p__Firmicutes_A;c__Clostridia;o__Oscillospirales;f__Oscillospiraceae;g__;s__	blast	91.9	iPHoP-RF;67.50
RGVC322	GB_GCA_004558115.1	d__Bacteria;p__Firmicutes_A;c__Clostridia;o__Oscillospirales;f__Oscillospiraceae;g__Dysosmobacter;s__Dysosmobacter sp004558115	blast	91.2	iPHoP-RF;82.80
RGVC322	GB_GCA_900544105.1	d__Bacteria;p__Firmicutes_A;c__Clostridia;o__Oscillospirales;f__Oscillospiraceae;g__Dysosmobacter;s__Dysosmobacter sp900544105	blast	92.1	None
RGVC322	GB_GCA_900544615.1	d__Bacteria;p__Firmicutes_A;c__Clostridia;o__Oscillospirales;f__Oscillospiraceae;g__Dysosmobacter;s__Dysosmobacter sp900544615	blast	91.1	iPHoP-RF;52.20
RGVC322	GB_GCA_900548505.1	d__Bacteria;p__Firmicutes_A;c__Clostridia;o__Oscillospirales;f__Oscillospiraceae;g__Dysosmobacter;s__Dysosmobacter sp900548505	blast	90.6	iPHoP-RF;75.70
RGVC322	GB_GCA_900554425.1	d__Bacteria;p__Firmicutes_A;c__Clostridia;o__Oscillospirales;f__Oscillospiraceae;g__Dysosmobacter;s__Dysosmobacter sp900554425	blast	91.1	iPHoP-RF;50.90
RGVC322	GB_GCA_900770295.1	d__Bacteria;p__Firmicutes_A;c__Clostridia;o__Oscillospirales;f__Oscillospiraceae;g__Dysosmobacter;s__Dysosmobacter sp900770295	blast	91.2	iPHoP-RF;81.10
RGVC322	RS_GCF_000283575.1	d__Bacteria;p__Firmicutes_A;c__Clostridia;o__Oscillospirales;f__Oscillospiraceae;g__Oscillibacter;s__Oscillibacter valericigenes	blast	92	None
RGVC322	RS_GCF_000307265.1	d__Bacteria;p__Firmicutes_A;c__Clostridia;o__Oscillospirales;f__Oscillospiraceae;g__Oscillibacter;s__Oscillibacter ruminantium	blast	91.7	iPHoP-RF;73.90
RGVC322	RS_GCF_000403435.2	d__Bacteria;p__Firmicutes_A;c__Clostridia;o__Oscillospirales;f__Oscillospiraceae;g__Dysosmobacter;s__Dysosmobacter sp000403435	blast	92	None
RGVC322	RS_GCF_005121165.1	d__Bacteria;p__Firmicutes_A;c__Clostridia;o__Oscillospirales;f__Oscillospiraceae;g__Dysosmobacter;s__Dysosmobacter welbionis	blast	93.7	iPHoP-RF;51.20
RGVC322	RS_GCF_014297285.1	d__Bacteria;p__Firmicutes_A;c__Clostridia;o__Oscillospirales;f__Oscillospiraceae;g__Dysosmobacter;s__Dysosmobacter sp001916835	blast	91.7	None
RGVC322	RS_GCF_014297375.1	d__Bacteria;p__Firmicutes_A;c__Clostridia;o__Oscillospirales;f__Oscillospiraceae;g__Dysosmobacter;s__Dysosmobacter sp014297375	blast	91.3	iPHoP-RF;50.90
RGVC322	RS_GCF_014334055.1	d__Bacteria;p__Firmicutes_A;c__Clostridia;o__Oscillospirales;f__Oscillospiraceae;g__NSJ-62;s__NSJ-62 sp014334055	blast	91.3	iPHoP-RF;59.80
RGVC322	RS_GCF_900115635.1	d__Bacteria;p__Firmicutes_A;c__Clostridia;o__Oscillospirales;f__Oscillospiraceae;g__Dysosmobacter;s__Dysosmobacter sp900115635	blast	91.2	None
RGVC324	GB_GCA_014337175.1	d__Bacteria;p__Firmicutes_A;c__Clostridia;o__Lachnospirales;f__Lachnospiraceae;g__Acetatifactor;s__Acetatifactor sp900066365	blast	92	iPHoP-RF;56.80
RGVC324	RS_GCF_003584705.1	d__Bacteria;p__Firmicutes_A;c__Clostridia;o__Lachnospirales;f__Lachnospiraceae;g__Acetatifactor;s__Acetatifactor sp900066565	blast	91.7	iPHoP-RF;65.30
RGVC325	3300022661_91	d__Bacteria;p__Bacteroidota;c__Bacteroidia;o__Bacteroidales;f__Rikenellaceae;g__Alistipes;s__	blast	91.8	iPHoP-RF;52.80
RGVC325	3300022660_93	d__Bacteria;p__Bacteroidota;c__Bacteroidia;o__Bacteroidales;f__Rikenellaceae;g__Alistipes;s__	blast	90.6	None
RGVC326	RS_GCF_014297285.1	d__Bacteria;p__Firmicutes_A;c__Clostridia;o__Oscillospirales;f__Oscillospiraceae;g__Dysosmobacter;s__Dysosmobacter sp001916835	blast	96.9	iPHoP-RF;79.00
RGVC326	RS_GCF_005121165.1	d__Bacteria;p__Firmicutes_A;c__Clostridia;o__Oscillospirales;f__Oscillospiraceae;g__Dysosmobacter;s__Dysosmobacter welbionis	blast	92	iPHoP-RF;69.30
RGVC326	RS_GCF_014297375.1	d__Bacteria;p__Firmicutes_A;c__Clostridia;o__Oscillospirales;f__Oscillospiraceae;g__Dysosmobacter;s__Dysosmobacter sp014297375	blast	91.9	iPHoP-RF;66.30
RGVC326	RS_GCF_000403435.2	d__Bacteria;p__Firmicutes_A;c__Clostridia;o__Oscillospirales;f__Oscillospiraceae;g__Dysosmobacter;s__Dysosmobacter sp000403435	blast	90.6	iPHoP-RF;74.10
RGVC326	RS_GCF_014334055.1	d__Bacteria;p__Firmicutes_A;c__Clostridia;o__Oscillospirales;f__Oscillospiraceae;g__NSJ-62;s__NSJ-62 sp014334055	blast	90.3	None
RGVC326	GB_GCA_900763685.1	d__Bacteria;p__Firmicutes_A;c__Clostridia;o__Oscillospirales;f__Oscillospiraceae;g__Dysosmobacter;s__Dysosmobacter sp900763685	blast	90.2	iPHoP-RF;69.80
RGVC326	GB_GCA_900544615.1	d__Bacteria;p__Firmicutes_A;c__Clostridia;o__Oscillospirales;f__Oscillospiraceae;g__Dysosmobacter;s__Dysosmobacter sp900544615	blast	90.1	iPHoP-RF;72.40
RGVC326	GB_GCA_900550685.1	d__Bacteria;p__Firmicutes_A;c__Clostridia;o__Oscillospirales;f__Oscillospiraceae;g__Dysosmobacter;s__Dysosmobacter sp900550685	blast	90.1	iPHoP-RF;76.80
RGVC326	3300012889_21	d__Bacteria;p__Firmicutes_A;c__Clostridia;o__Oscillospirales;f__Oscillospiraceae;g__;s__	blast	90	None
RGVC327	GB_GCA_004555155.1	d__Bacteria;p__Firmicutes_A;c__Clostridia_A;o__Christensenellales;f__CAG-74;g__UMGS1603;s__UMGS1603 sp004555155	blast	91.6	None
RGVC329	3300010259_5	d__Bacteria;p__Firmicutes_A;c__Clostridia;o__Oscillospirales;f__Oscillospiraceae;g__CAG-110;s__	blast	92.9	None
RGVC329	GB_GCA_000434635.1	d__Bacteria;p__Firmicutes_A;c__Clostridia;o__Oscillospirales;f__Oscillospiraceae;g__CAG-110;s__CAG-110 sp000434635	blast	93.7	iPHoP-RF;50.40
RGVC329	GB_GCA_002436765.1	d__Bacteria;p__Firmicutes_A;c__Clostridia;o__Oscillospirales;f__Oscillospiraceae;g__CAG-110;s__CAG-110 sp002436765	blast	91.8	None
RGVC329	GB_GCA_002437585.1	d__Bacteria;p__Firmicutes_A;c__Clostridia;o__Oscillospirales;f__Oscillospiraceae;g__CAG-110;s__CAG-110 sp002437585	blast	90.8	None
RGVC329	GB_GCA_004555705.1	d__Bacteria;p__Firmicutes_A;c__Clostridia;o__Oscillospirales;f__Oscillospiraceae;g__CAG-110;s__CAG-110 sp004555705	blast	90.8	None
RGVC329	GB_GCA_900540635.1	d__Bacteria;p__Firmicutes_A;c__Clostridia;o__Oscillospirales;f__Oscillospiraceae;g__CAG-110;s__CAG-110 sp900540635	blast	90	None
RGVC329	GB_GCA_900544945.1	d__Bacteria;p__Firmicutes_A;c__Clostridia;o__Oscillospirales;f__Oscillospiraceae;g__CAG-110;s__CAG-110 sp900544945	blast	90.8	None
RGVC329	GB_GCA_900546075.1	d__Bacteria;p__Firmicutes_A;c__Clostridia;o__Oscillospirales;f__Oscillospiraceae;g__CAG-110;s__CAG-110 sp900546075	blast	92.1	None
RGVC329	GB_GCA_900762245.1	d__Bacteria;p__Firmicutes_A;c__Clostridia;o__Oscillospirales;f__Oscillospiraceae;g__CAG-110;s__CAG-110 sp900762245	blast	90.8	None
RGVC329	GB_GCA_900763965.1	d__Bacteria;p__Firmicutes_A;c__Clostridia;o__Oscillospirales;f__Oscillospiraceae;g__CAG-110;s__CAG-110 sp900763965	blast	90.8	None
RGVC329	GB_GCA_900769835.1	d__Bacteria;p__Firmicutes_A;c__Clostridia;o__Oscillospirales;f__Oscillospiraceae;g__CAG-110;s__CAG-110 sp900769835	blast	90	None
RGVC332	RS_GCF_000021305.1	d__Bacteria;p__Firmicutes;c__Bacilli;o__;f__Bacillaceae_G;g__Bacillus_A;s__Bacillus_A thuringiensis_S	blast	92.1	None
RGVC332	RS_GCF_001883995.1	d__Bacteria;p__Firmicutes;c__Bacilli;o__;f__Bacillaceae_G;g__Bacillus_A;s__Bacillus_A paranthracis	blast	92.2	None
RGVC332	RS_GCF_001884035.1	d__Bacteria;p__Firmicutes;c__Bacilli;o__;f__Bacillaceae_G;g__Bacillus_A;s__Bacillus_A tropicus	blast	93.6	None
RGVC332	RS_GCF_002574955.1	d__Bacteria;p__Firmicutes;c__Bacilli;o__;f__Bacillaceae_G;g__Bacillus_A;s__Bacillus_A cereus_AT	blast	92.1	None
RGVC333	GB_GCA_004557125.1	d__Bacteria;p__Firmicutes_A;c__Clostridia_A;o__Christensenellales;f__CAG-74;g__SFTH01;s__SFTH01 sp004557125	blast	92.9	iPHoP-RF;71.70
RGVC333	GB_GCA_900553265.1	d__Bacteria;p__Firmicutes_A;c__Clostridia_A;o__Christensenellales;f__CAG-74;g__UMGS1603;s__UMGS1603 sp900553265	blast	92	iPHoP-RF;67.30
RGVC333	RS_GCF_900759005.1	d__Bacteria;p__Firmicutes_A;c__Clostridia_A;o__Christensenellales;f__CAG-74;g__UMGS1603;s__UMGS1603 sp900759005	blast	92.1	iPHoP-RF;77.80
RGVC335	GB_GCA_002316015.1	d__Bacteria;p__Bacteroidota;c__Bacteroidia;o__Bacteroidales;f__Bacteroidaceae;g__UBA4372;s__UBA4372 sp002316015	blast	91.5	None
RGVC336	RS_GCF_003612285.1	d__Bacteria;p__Firmicutes_A;c__Clostridia;o__Lachnospirales;f__Lachnospiraceae;g__TF01-11;s__TF01-11 sp003612285	blast	92.3	iPHoP-RF;73.90
RGVC338	GB_GCA_900549055.1	d__Bacteria;p__Firmicutes_A;c__Clostridia;o__Oscillospirales;f__Acutalibacteraceae;g__UBA737;s__UBA737 sp900549055	blast	91.6	iPHoP-RF;63.00
RGVC338	GB_GCA_900549755.1	d__Bacteria;p__Firmicutes_A;c__Clostridia;o__Oscillospirales;f__Acutalibacteraceae;g__UBA737;s__UBA737 sp900549755	blast	90.2	iPHoP-RF;55.70
RGVC341	GB_GCA_012520645.1	d__Bacteria;p__Firmicutes_A;c__Clostridia;o__Lachnospirales;f__Lachnospiraceae;g__JAAYNV01;s__JAAYNV01 sp012520645	blast	92	None
RGVC343	3300018430_43	d__Bacteria;p__Bacteroidota;c__Bacteroidia;o__Bacteroidales;f__Bacteroidaceae;g__HGM04593;s__	iPHoP-RF	93.4	blast;90.90
RGVC343	3300018430_52	d__Bacteria;p__Bacteroidota;c__Bacteroidia;o__Bacteroidales;f__Bacteroidaceae;g__;s__	blast	91.8	iPHoP-RF;62.70
RGVC343	3300022661_113	d__Bacteria;p__Bacteroidota;c__Bacteroidia;o__Bacteroidales;f__Bacteroidaceae;g__HGM04593;s__	iPHoP-RF	96.1	blast;92.70
RGVC343	3300022661_76	d__Bacteria;p__Bacteroidota;c__Bacteroidia;o__Bacteroidales;f__Bacteroidaceae;g__;s__	blast	93.9	iPHoP-RF;92.80
RGVC343	RS_GCF_900769465.1	d__Bacteria;p__Bacteroidota;c__Bacteroidia;o__Bacteroidales;f__Bacteroidaceae;g__HGM04593;s__HGM04593 sp900769465	blast	92.1	iPHoP-RF;79.80
RGVC343	RS_GCF_900769765.1	d__Bacteria;p__Bacteroidota;c__Bacteroidia;o__Bacteroidales;f__Bacteroidaceae;g__HGM04593;s__HGM04593 sp900769765	blast	90.9	iPHoP-RF;83.30
RGVC343	RS_GCF_900770655.1	d__Bacteria;p__Bacteroidota;c__Bacteroidia;o__Bacteroidales;f__Bacteroidaceae;g__HGM04593;s__HGM04593 sp900770655	iPHoP-RF	96.1	blast;93.70
RGVC343	RS_GCF_900770665.1	d__Bacteria;p__Bacteroidota;c__Bacteroidia;o__Bacteroidales;f__Bacteroidaceae;g__HGM04593;s__HGM04593 sp900770665	blast	91.2	iPHoP-RF;78.70
RGVC344	3300012983_41	d__Bacteria;p__Bacteroidota;c__Bacteroidia;o__Bacteroidales;f__Rikenellaceae;g__Alistipes;s__	blast	91.8	iPHoP-RF;65.10
RGVC344	3300018878_209	d__Bacteria;p__Bacteroidota;c__Bacteroidia;o__Bacteroidales;f__Rikenellaceae;g__Alistipes;s__	blast	91.4	iPHoP-RF;84.50
RGVC344	3300022753_111	d__Bacteria;p__Bacteroidota;c__Bacteroidia;o__Bacteroidales;f__Rikenellaceae;g__Alistipes;s__	blast	93.5	iPHoP-RF;54.90
RGVC344	GB_GCA_002362235.1	d__Bacteria;p__Bacteroidota;c__Bacteroidia;o__Bacteroidales;f__Rikenellaceae;g__Alistipes;s__Alistipes sp002362235	blast	91.3	iPHoP-RF;68.60
RGVC344	GB_GCA_900546065.1	d__Bacteria;p__Bacteroidota;c__Bacteroidia;o__Bacteroidales;f__Rikenellaceae;g__Alistipes;s__Alistipes sp900546065	blast	91.6	iPHoP-RF;87.30
RGVC344	GB_GCA_900548155.1	d__Bacteria;p__Bacteroidota;c__Bacteroidia;o__Bacteroidales;f__Rikenellaceae;g__Alistipes;s__Alistipes sp900548155	blast	91.6	iPHoP-RF;76.10
RGVC344	GB_GCA_900761235.1	d__Bacteria;p__Bacteroidota;c__Bacteroidia;o__Bacteroidales;f__Rikenellaceae;g__Alistipes;s__Alistipes sp900761235	blast	91.8	iPHoP-RF;80.80
RGVC344	GB_GCA_900766655.1	d__Bacteria;p__Bacteroidota;c__Bacteroidia;o__Bacteroidales;f__Rikenellaceae;g__Alistipes;s__Alistipes sp900766655	blast	90.5	iPHoP-RF;51.20
RGVC344	GB_GCA_900768045.1	d__Bacteria;p__Bacteroidota;c__Bacteroidia;o__Bacteroidales;f__Rikenellaceae;g__Alistipes;s__Alistipes sp900768045	blast	91.7	iPHoP-RF;73.00
RGVC344	GB_GCA_900770635.1	d__Bacteria;p__Bacteroidota;c__Bacteroidia;o__Bacteroidales;f__Rikenellaceae;g__Alistipes;s__Alistipes sp900770635	blast	91.7	iPHoP-RF;69.30
RGVC345	3300012979_12	d__Bacteria;p__Bacteroidota;c__Bacteroidia;o__Bacteroidales;f__UBA932;g__RC9;s__	blast	96.6	iPHoP-RF;82.20
RGVC345	GB_GCA_002298075.1	d__Bacteria;p__Bacteroidota;c__Bacteroidia;o__Bacteroidales;f__UBA932;g__RC9;s__RC9 sp002298075	blast	90.8	iPHoP-RF;73.90
RGVC345	GB_GCA_900546395.1	d__Bacteria;p__Bacteroidota;c__Bacteroidia;o__Bacteroidales;f__UBA932;g__RC9;s__RC9 sp900546395	blast	90.1	None
RGVC348	RS_GCF_005121165.1	d__Bacteria;p__Firmicutes_A;c__Clostridia;o__Oscillospirales;f__Oscillospiraceae;g__Dysosmobacter;s__Dysosmobacter welbionis	blast	92.9	None
RGVC348	RS_GCF_014334055.1	d__Bacteria;p__Firmicutes_A;c__Clostridia;o__Oscillospirales;f__Oscillospiraceae;g__NSJ-62;s__NSJ-62 sp014334055	blast	91.7	None
RGVC350	GB_GCA_000436735.1	d__Bacteria;p__Firmicutes_A;c__Clostridia;o__Oscillospirales;f__Oscillospiraceae;g__CAG-170;s__CAG-170 sp000436735	blast	91.5	None
RGVC351	RS_GCF_000492175.1	d__Bacteria;p__Firmicutes_A;c__Clostridia;o__Oscillospirales;f__Oscillospiraceae;g__Lawsonibacter;s__Lawsonibacter sp000492175	blast	93.5	None
RGVC353	RS_GCF_900757255.1	d__Bacteria;p__Firmicutes_A;c__Clostridia;o__HGM11514;f__HGM11514;g__HGM11514;s__HGM11514 sp900757255	blast	93.4	iPHoP-RF;61.10
RGVC354	GB_GCA_014385095.1	d__Bacteria;p__Firmicutes_A;c__Clostridia;o__Oscillospirales;f__Ruminococcaceae;g__NSJ-54;s__NSJ-54 sp014385095	blast	91.8	iPHoP-RF;52.50
RGVC356	RS_GCF_900083545.1	d__Bacteria;p__Bacteroidota;c__Bacteroidia;o__Bacteroidales;f__Rikenellaceae;g__Alistipes;s__Alistipes provencensis	blast	91.7	None
RGVC357	RS_GCF_902362725.1	d__Bacteria;p__Firmicutes_A;c__Clostridia;o__Lachnospirales;f__Lachnospiraceae;g__Anaerosacchariphilus;s__Anaerosacchariphilus sp900066385	blast	92.2	None
RGVC358	RS_GCF_000239295.1	d__Bacteria;p__Firmicutes_A;c__Clostridia;o__Oscillospirales;f__Oscillospiraceae;g__Flavonifractor;s__Flavonifractor plautii	blast	93.2	iPHoP-RF;58.40
RGVC358	RS_GCF_008727735.1	d__Bacteria;p__Firmicutes_A;c__Clostridia;o__Oscillospirales;f__Oscillospiraceae;g__Lawsonibacter;s__Lawsonibacter sp000177015	blast	90.4	None
RGVC359	3300026522_23	d__Bacteria;p__Firmicutes_A;c__Clostridia;o__Monoglobales_A;f__UBA1381;g__;s__	blast	91.4	iPHoP-RF;54.60
RGVC360	GB_GCA_000174895.1	d__Bacteria;p__Firmicutes_A;c__Clostridia;o__Oscillospirales;f__Ruminococcaceae;g__Ruminococcus;s__Ruminococcus flavefaciens_A	blast	91	None
RGVC360	GB_GCA_900540005.1	d__Bacteria;p__Firmicutes_A;c__Clostridia;o__Oscillospirales;f__Ruminococcaceae;g__Ruminococcus;s__Ruminococcus sp900540005	blast	90.5	iPHoP-RF;61.90
RGVC360	RS_GCF_000526795.1	d__Bacteria;p__Firmicutes_A;c__Clostridia;o__Oscillospirales;f__Ruminococcaceae;g__Ruminococcus;s__Ruminococcus flavefaciens_D	blast	92	None
RGVC360	RS_GCF_000621785.1	d__Bacteria;p__Firmicutes_A;c__Clostridia;o__Oscillospirales;f__Ruminococcaceae;g__Ruminococcus;s__Ruminococcus flavefaciens_C	blast	90.4	None
RGVC360	RS_GCF_900109435.1	d__Bacteria;p__Firmicutes_A;c__Clostridia;o__Oscillospirales;f__Ruminococcaceae;g__Ruminococcus;s__Ruminococcus flavefaciens_G	blast	90.2	None
RGVC361	GB_GCA_002362625.1	d__Bacteria;p__Firmicutes_A;c__Clostridia;o__Oscillospirales;f__Oscillospiraceae;g__CAG-110;s__CAG-110 sp002362625	blast	93.7	iPHoP-RF;57.60
RGVC361	GB_GCA_902388735.1	d__Bacteria;p__Firmicutes_A;c__Clostridia;o__Oscillospirales;f__Oscillospiraceae;g__CAG-83;s__CAG-83 sp902388735	blast	91.7	None
RGVC363	GB_GCA_000434635.1	d__Bacteria;p__Firmicutes_A;c__Clostridia;o__Oscillospirales;f__Oscillospiraceae;g__CAG-110;s__CAG-110 sp000434635	blast	96.7	None
RGVC363	GB_GCA_002362145.1	d__Bacteria;p__Firmicutes_A;c__Clostridia;o__Oscillospirales;f__Oscillospiraceae;g__CAG-110;s__CAG-110 sp002362145	blast	92.1	None
RGVC363	GB_GCA_002362625.1	d__Bacteria;p__Firmicutes_A;c__Clostridia;o__Oscillospirales;f__Oscillospiraceae;g__CAG-110;s__CAG-110 sp002362625	blast	93.8	None
RGVC363	GB_GCA_002436765.1	d__Bacteria;p__Firmicutes_A;c__Clostridia;o__Oscillospirales;f__Oscillospiraceae;g__CAG-110;s__CAG-110 sp002436765	blast	96.6	None
RGVC363	GB_GCA_002437585.1	d__Bacteria;p__Firmicutes_A;c__Clostridia;o__Oscillospirales;f__Oscillospiraceae;g__CAG-110;s__CAG-110 sp002437585	blast	92.1	None
RGVC363	GB_GCA_002493965.1	d__Bacteria;p__Firmicutes_A;c__Clostridia;o__Oscillospirales;f__Oscillospiraceae;g__CAG-110;s__CAG-110 sp002493965	blast	93.8	None
RGVC363	GB_GCA_004555705.1	d__Bacteria;p__Firmicutes_A;c__Clostridia;o__Oscillospirales;f__Oscillospiraceae;g__CAG-110;s__CAG-110 sp004555705	blast	92.1	None
RGVC363	GB_GCA_900540635.1	d__Bacteria;p__Firmicutes_A;c__Clostridia;o__Oscillospirales;f__Oscillospiraceae;g__CAG-110;s__CAG-110 sp900540635	blast	91.8	None
RGVC363	GB_GCA_900544945.1	d__Bacteria;p__Firmicutes_A;c__Clostridia;o__Oscillospirales;f__Oscillospiraceae;g__CAG-110;s__CAG-110 sp900544945	blast	92.1	None
RGVC363	GB_GCA_900546075.1	d__Bacteria;p__Firmicutes_A;c__Clostridia;o__Oscillospirales;f__Oscillospiraceae;g__CAG-110;s__CAG-110 sp900546075	blast	95.3	None
RGVC363	GB_GCA_900553805.1	d__Bacteria;p__Firmicutes_A;c__Clostridia;o__Oscillospirales;f__Oscillospiraceae;g__CAG-110;s__CAG-110 sp900553805	blast	91.8	None
RGVC363	GB_GCA_900554625.1	d__Bacteria;p__Firmicutes_A;c__Clostridia;o__Oscillospirales;f__Oscillospiraceae;g__CAG-110;s__CAG-110 sp900554625	blast	90.9	None
RGVC363	GB_GCA_900762245.1	d__Bacteria;p__Firmicutes_A;c__Clostridia;o__Oscillospirales;f__Oscillospiraceae;g__CAG-110;s__CAG-110 sp900762245	blast	92.1	None
RGVC363	GB_GCA_900763965.1	d__Bacteria;p__Firmicutes_A;c__Clostridia;o__Oscillospirales;f__Oscillospiraceae;g__CAG-110;s__CAG-110 sp900763965	blast	92.1	None
RGVC363	GB_GCA_900769845.1	d__Bacteria;p__Firmicutes_A;c__Clostridia;o__Oscillospirales;f__Oscillospiraceae;g__CAG-110;s__CAG-110 sp900769845	blast	91.8	None
RGVC363	GB_GCA_900770015.1	d__Bacteria;p__Firmicutes_A;c__Clostridia;o__Oscillospirales;f__Oscillospiraceae;g__CAG-110;s__CAG-110 sp900770015	blast	91.8	None
RGVC364	RS_GCF_900760055.1	d__Bacteria;p__Verrucomicrobiota;c__Verrucomicrobiae;o__Opitutales;f__CAG-312;g__CAG-312;s__CAG-312 sp900760055	blast	96.5	iPHoP-RF;74.10
RGVC364	GB_GCA_900548275.1	d__Bacteria;p__Verrucomicrobiota;c__Verrucomicrobiae;o__Opitutales;f__CAG-312;g__CAG-312;s__CAG-312 sp900548275	blast	92	iPHoP-RF;75.40
RGVC364	GB_GCA_900321895.1	d__Bacteria;p__Cyanobacteria;c__Vampirovibrionia;o__Gastranaerophilales;f__Gastranaerophilaceae;g__CAG-484;s__CAG-484 sp900321895	blast	90.5	None
RGVC364	RS_GCF_900769645.1	d__Bacteria;p__Cyanobacteria;c__Vampirovibrionia;o__Gastranaerophilales;f__Gastranaerophilaceae;g__Zag1;s__Zag1 sp900769645	blast	90.5	None
RGVC365	GB_GCA_000431575.1	d__Bacteria;p__Firmicutes_A;c__Clostridia;o__Oscillospirales;f__Oscillospiraceae;g__CAG-83;s__CAG-83 sp000431575	blast	91.9	None
RGVC366	3300005460_68	d__Bacteria;p__Firmicutes_A;c__Clostridia_A;o__Christensenellales;f__Borkfalkiaceae;g__UMGS1004;s__	blast	91.9	iPHoP-RF;71.90
RGVC366	GB_GCA_003343805.1	d__Bacteria;p__Firmicutes_A;c__Clostridia_A;o__Christensenellales;f__Borkfalkiaceae;g__UMGS1004;s__UMGS1004 sp003343805	blast	90.4	iPHoP-RF;87.00
RGVC366	GB_GCA_900547645.1	d__Bacteria;p__Firmicutes_A;c__Clostridia_A;o__Christensenellales;f__Borkfalkiaceae;g__UMGS1004;s__UMGS1004 sp900547645	blast	91.8	iPHoP-RF;55.40
RGVC366	GB_GCA_900548845.1	d__Bacteria;p__Firmicutes_A;c__Clostridia_A;o__Christensenellales;f__Borkfalkiaceae;g__UMGS1004;s__UMGS1004 sp900548845	blast	90.9	iPHoP-RF;85.40
RGVC366	RS_GCF_900761685.1	d__Bacteria;p__Firmicutes_A;c__Clostridia_A;o__Christensenellales;f__Borkfalkiaceae;g__UMGS1004;s__UMGS1004 sp900761685	blast	90.8	iPHoP-RF;75.40
RGVC367	3300018430_43	d__Bacteria;p__Bacteroidota;c__Bacteroidia;o__Bacteroidales;f__Bacteroidaceae;g__HGM04593;s__	blast	91.9	iPHoP-RF;77.80
RGVC367	3300018430_52	d__Bacteria;p__Bacteroidota;c__Bacteroidia;o__Bacteroidales;f__Bacteroidaceae;g__;s__	iPHoP-RF	94.1	blast;92.10
RGVC367	3300022661_113	d__Bacteria;p__Bacteroidota;c__Bacteroidia;o__Bacteroidales;f__Bacteroidaceae;g__HGM04593;s__	blast	92.1	iPHoP-RF;66.50
RGVC367	3300022661_76	d__Bacteria;p__Bacteroidota;c__Bacteroidia;o__Bacteroidales;f__Bacteroidaceae;g__;s__	blast	92.1	iPHoP-RF;75.00
RGVC367	RS_GCF_900769465.1	d__Bacteria;p__Bacteroidota;c__Bacteroidia;o__Bacteroidales;f__Bacteroidaceae;g__HGM04593;s__HGM04593 sp900769465	blast	94.8	iPHoP-RF;75.90
RGVC367	RS_GCF_900769765.1	d__Bacteria;p__Bacteroidota;c__Bacteroidia;o__Bacteroidales;f__Bacteroidaceae;g__HGM04593;s__HGM04593 sp900769765	blast	90.3	iPHoP-RF;67.00
RGVC367	RS_GCF_900770655.1	d__Bacteria;p__Bacteroidota;c__Bacteroidia;o__Bacteroidales;f__Bacteroidaceae;g__HGM04593;s__HGM04593 sp900770655	blast	92.7	iPHoP-RF;78.00
RGVC367	RS_GCF_900770665.1	d__Bacteria;p__Bacteroidota;c__Bacteroidia;o__Bacteroidales;f__Bacteroidaceae;g__HGM04593;s__HGM04593 sp900770665	blast	95.3	iPHoP-RF;81.90
RGVC368	GB_GCA_000432135.1	d__Bacteria;p__Firmicutes_A;c__Clostridia;o__Oscillospirales;f__Oscillospiraceae;g__CAG-170;s__CAG-170 sp000432135	blast	96.9	iPHoP-RF;75.20
RGVC368	GB_GCA_002404795.1	d__Bacteria;p__Firmicutes_A;c__Clostridia;o__Oscillospirales;f__Oscillospiraceae;g__CAG-170;s__CAG-170 sp002404795	blast	96.9	iPHoP-RF;83.30
RGVC370	RS_GCF_900167375.1	d__Bacteria;p__Firmicutes;c__Bacilli;o__Erysipelotrichales;f__Erysipelotrichaceae;g__Anaerorhabdus;s__Anaerorhabdus furcosa	blast	91.8	None
RGVC371	RS_GCF_900232885.1	d__Bacteria;p__Firmicutes_A;c__Clostridia;o__Oscillospirales;f__Acutalibacteraceae;g__Marseille-P4683;s__Marseille-P4683 sp900232885	blast	93.9	iPHoP-RF;50.20
RGVC372	RS_GCF_000210575.1	d__Bacteria;p__Bacteroidota;c__Bacteroidia;o__Bacteroidales;f__Rikenellaceae;g__Alistipes;s__Alistipes shahii	blast	96.9	iPHoP-RF;71.30
RGVC372	RS_GCF_006542685.1	d__Bacteria;p__Bacteroidota;c__Bacteroidia;o__Bacteroidales;f__Rikenellaceae;g__Alistipes;s__Alistipes dispar	blast	91.7	iPHoP-RF;54.40
RGVC375	RS_GCF_009696375.1	d__Bacteria;p__Firmicutes_A;c__Clostridia;o__Lachnospirales;f__Lachnospiraceae;g__Enterocloster;s__Enterocloster sp900540675	blast	92.4	None
RGVC376	GB_GCA_003018335.1	d__Bacteria;p__Proteobacteria;c__Gammaproteobacteria;o__Enterobacterales;f__Enterobacteriaceae;g__Escherichia;s__Escherichia coli_C	blast	96.8	iPHoP-RF;95.40
RGVC376	RS_GCF_000026225.1	d__Bacteria;p__Proteobacteria;c__Gammaproteobacteria;o__Enterobacterales;f__Enterobacteriaceae;g__Escherichia;s__Escherichia fergusonii	iPHoP-RF	97.1	None
RGVC376	RS_GCF_000026325.1	d__Bacteria;p__Proteobacteria;c__Gammaproteobacteria;o__Enterobacterales;f__Enterobacteriaceae;g__Escherichia;s__Escherichia coli_D	blast	96.8	iPHoP-RF;95.70
RGVC376	RS_GCF_000208585.1	d__Bacteria;p__Proteobacteria;c__Gammaproteobacteria;o__Enterobacterales;f__Enterobacteriaceae;g__Escherichia;s__Escherichia sp000208585	iPHoP-RF	95.7	None
RGVC376	RS_GCF_000759775.1	d__Bacteria;p__Proteobacteria;c__Gammaproteobacteria;o__Enterobacterales;f__Enterobacteriaceae;g__Escherichia;s__Escherichia albertii	blast	93.7	iPHoP-RF;90.80
RGVC376	RS_GCF_001660175.1	d__Bacteria;p__Proteobacteria;c__Gammaproteobacteria;o__Enterobacterales;f__Enterobacteriaceae;g__Escherichia;s__Escherichia sp001660175	iPHoP-RF	95.4	None
RGVC376	RS_GCF_002900365.1	d__Bacteria;p__Proteobacteria;c__Gammaproteobacteria;o__Enterobacterales;f__Enterobacteriaceae;g__Escherichia;s__Escherichia marmotae	iPHoP-RF	96.1	None
RGVC376	RS_GCF_002949675.1	d__Bacteria;p__Proteobacteria;c__Gammaproteobacteria;o__Enterobacterales;f__Enterobacteriaceae;g__Escherichia;s__Escherichia dysenteriae	blast	96.8	iPHoP-RF;96.10
RGVC376	RS_GCF_002950215.1	d__Bacteria;p__Proteobacteria;c__Gammaproteobacteria;o__Enterobacterales;f__Enterobacteriaceae;g__Escherichia;s__Escherichia flexneri	blast	96.9	iPHoP-RF;96.40
RGVC376	RS_GCF_002965065.1	d__Bacteria;p__Proteobacteria;c__Gammaproteobacteria;o__Enterobacterales;f__Enterobacteriaceae;g__Escherichia;s__Escherichia sp002965065	iPHoP-RF	96.1	None
RGVC376	RS_GCF_003697165.2	d__Bacteria;p__Proteobacteria;c__Gammaproteobacteria;o__Enterobacterales;f__Enterobacteriaceae;g__Escherichia;s__Escherichia coli	blast	96.8	iPHoP-RF;95.70
RGVC376	RS_GCF_004211955.1	d__Bacteria;p__Proteobacteria;c__Gammaproteobacteria;o__Enterobacterales;f__Enterobacteriaceae;g__Escherichia;s__Escherichia sp004211955	iPHoP-RF	95.4	None
RGVC376	RS_GCF_005843885.1	d__Bacteria;p__Proteobacteria;c__Gammaproteobacteria;o__Enterobacterales;f__Enterobacteriaceae;g__Escherichia;s__Escherichia sp005843885	iPHoP-RF	95.7	None
RGVC376	RS_GCF_011881725.1	d__Bacteria;p__Proteobacteria;c__Gammaproteobacteria;o__Enterobacterales;f__Enterobacteriaceae;g__Escherichia;s__Escherichia coli_E	iPHoP-RF	95.7	None
RGVC377	3300022661_60	d__Bacteria;p__Firmicutes_A;c__Clostridia;o__Oscillospirales;f__CAG-272;g__UMGS1696;s__	blast	91.7	iPHoP-RF;76.10
RGVC377	RS_GCF_900753285.1	d__Bacteria;p__Firmicutes_A;c__Clostridia;o__Oscillospirales;f__CAG-272;g__UMGS1696;s__UMGS1696 sp900753285	blast	92	iPHoP-RF;76.80
RGVC378	GB_GCA_003018335.1	d__Bacteria;p__Proteobacteria;c__Gammaproteobacteria;o__Enterobacterales;f__Enterobacteriaceae;g__Escherichia;s__Escherichia coli_C	blast	96.6	iPHoP-RF;94.40
RGVC378	RS_GCF_000026225.1	d__Bacteria;p__Proteobacteria;c__Gammaproteobacteria;o__Enterobacterales;f__Enterobacteriaceae;g__Escherichia;s__Escherichia fergusonii	blast	95.7	iPHoP-RF;94.40
RGVC378	RS_GCF_000026325.1	d__Bacteria;p__Proteobacteria;c__Gammaproteobacteria;o__Enterobacterales;f__Enterobacteriaceae;g__Escherichia;s__Escherichia coli_D	blast	96.6	iPHoP-RF;94.70
RGVC378	RS_GCF_000208585.1	d__Bacteria;p__Proteobacteria;c__Gammaproteobacteria;o__Enterobacterales;f__Enterobacteriaceae;g__Escherichia;s__Escherichia sp000208585	blast	96.5	iPHoP-RF;96.40
RGVC378	RS_GCF_000759775.1	d__Bacteria;p__Proteobacteria;c__Gammaproteobacteria;o__Enterobacterales;f__Enterobacteriaceae;g__Escherichia;s__Escherichia albertii	blast	92.4	iPHoP-RF;91.80
RGVC378	RS_GCF_001660175.1	d__Bacteria;p__Proteobacteria;c__Gammaproteobacteria;o__Enterobacterales;f__Enterobacteriaceae;g__Escherichia;s__Escherichia sp001660175	iPHoP-RF	96.1	None
RGVC378	RS_GCF_002900365.1	d__Bacteria;p__Proteobacteria;c__Gammaproteobacteria;o__Enterobacterales;f__Enterobacteriaceae;g__Escherichia;s__Escherichia marmotae	blast	96.3	iPHoP-RF;95.40
RGVC378	RS_GCF_002949675.1	d__Bacteria;p__Proteobacteria;c__Gammaproteobacteria;o__Enterobacterales;f__Enterobacteriaceae;g__Escherichia;s__Escherichia dysenteriae	blast	96.7	iPHoP-RF;96.10
RGVC378	RS_GCF_002950215.1	d__Bacteria;p__Proteobacteria;c__Gammaproteobacteria;o__Enterobacterales;f__Enterobacteriaceae;g__Escherichia;s__Escherichia flexneri	blast	96.8	iPHoP-RF;96.40
RGVC378	RS_GCF_002965065.1	d__Bacteria;p__Proteobacteria;c__Gammaproteobacteria;o__Enterobacterales;f__Enterobacteriaceae;g__Escherichia;s__Escherichia sp002965065	iPHoP-RF	96.1	None
RGVC378	RS_GCF_003697165.2	d__Bacteria;p__Proteobacteria;c__Gammaproteobacteria;o__Enterobacterales;f__Enterobacteriaceae;g__Escherichia;s__Escherichia coli	blast	96.7	iPHoP-RF;95.70
RGVC378	RS_GCF_004211955.1	d__Bacteria;p__Proteobacteria;c__Gammaproteobacteria;o__Enterobacterales;f__Enterobacteriaceae;g__Escherichia;s__Escherichia sp004211955	iPHoP-RF	94.7	None
RGVC378	RS_GCF_005843885.1	d__Bacteria;p__Proteobacteria;c__Gammaproteobacteria;o__Enterobacterales;f__Enterobacteriaceae;g__Escherichia;s__Escherichia sp005843885	iPHoP-RF	96.1	None
RGVC378	RS_GCF_011881725.1	d__Bacteria;p__Proteobacteria;c__Gammaproteobacteria;o__Enterobacterales;f__Enterobacteriaceae;g__Escherichia;s__Escherichia coli_E	iPHoP-RF	95.1	None
RGVC379	GB_GCA_000432835.1	d__Bacteria;p__Firmicutes;c__Bacilli;o__RF39;f__UBA660;g__CAG-417;s__CAG-417 sp000432835	blast	92.1	None
RGVC383	GB_GCA_000434635.1	d__Bacteria;p__Firmicutes_A;c__Clostridia;o__Oscillospirales;f__Oscillospiraceae;g__CAG-110;s__CAG-110 sp000434635	blast	96.9	iPHoP-RF;73.70
RGVC383	GB_GCA_900763965.1	d__Bacteria;p__Firmicutes_A;c__Clostridia;o__Oscillospirales;f__Oscillospiraceae;g__CAG-110;s__CAG-110 sp900763965	blast	92.7	None
RGVC383	3300022660_140	d__Bacteria;p__Firmicutes_A;c__Clostridia;o__Oscillospirales;f__Oscillospiraceae;g__CAG-110;s__	blast	91.7	iPHoP-RF;57.90
RGVC383	GB_GCA_002437585.1	d__Bacteria;p__Firmicutes_A;c__Clostridia;o__Oscillospirales;f__Oscillospiraceae;g__CAG-110;s__CAG-110 sp002437585	blast	91.6	iPHoP-RF;58.70
RGVC383	GB_GCA_900544945.1	d__Bacteria;p__Firmicutes_A;c__Clostridia;o__Oscillospirales;f__Oscillospiraceae;g__CAG-110;s__CAG-110 sp900544945	blast	91.6	iPHoP-RF;58.20
RGVC383	GB_GCA_900549495.1	d__Bacteria;p__Firmicutes_A;c__Clostridia;o__Oscillospirales;f__Oscillospiraceae;g__CAG-110;s__CAG-110 sp900549495	blast	91.6	iPHoP-RF;54.60
RGVC383	GB_GCA_900752285.1	d__Bacteria;p__Firmicutes_A;c__Clostridia;o__Oscillospirales;f__Oscillospiraceae;g__CAG-110;s__CAG-110 sp900752285	blast	91.6	iPHoP-RF;56.50
RGVC383	GB_GCA_900762245.1	d__Bacteria;p__Firmicutes_A;c__Clostridia;o__Oscillospirales;f__Oscillospiraceae;g__CAG-110;s__CAG-110 sp900762245	blast	91.6	iPHoP-RF;68.90
RGVC383	3300010259_5	d__Bacteria;p__Firmicutes_A;c__Clostridia;o__Oscillospirales;f__Oscillospiraceae;g__CAG-110;s__	blast	91.4	None
RGVC383	GB_GCA_004555705.1	d__Bacteria;p__Firmicutes_A;c__Clostridia;o__Oscillospirales;f__Oscillospiraceae;g__CAG-110;s__CAG-110 sp004555705	blast	91.4	iPHoP-RF;56.00
RGVC383	GB_GCA_900540635.1	d__Bacteria;p__Firmicutes_A;c__Clostridia;o__Oscillospirales;f__Oscillospiraceae;g__CAG-110;s__CAG-110 sp900540635	blast	91.4	None
RGVC383	GB_GCA_900547405.1	d__Bacteria;p__Firmicutes_A;c__Clostridia;o__Oscillospirales;f__Oscillospiraceae;g__CAG-110;s__CAG-110 sp900547405	blast	91.4	None
RGVC383	GB_GCA_900769845.1	d__Bacteria;p__Firmicutes_A;c__Clostridia;o__Oscillospirales;f__Oscillospiraceae;g__CAG-110;s__CAG-110 sp900769845	blast	91.2	iPHoP-RF;52.20
RGVC383	GB_GCA_900546075.1	d__Bacteria;p__Firmicutes_A;c__Clostridia;o__Oscillospirales;f__Oscillospiraceae;g__CAG-110;s__CAG-110 sp900546075	blast	90.9	iPHoP-RF;63.50
RGVC384	GB_GCA_900315765.1	d__Bacteria;p__Bacteroidota;c__Bacteroidia;o__Bacteroidales;f__Bacteroidaceae;g__Prevotella;s__Prevotella sp900315765	blast	94.4	iPHoP-RF;77.80
RGVC384	GB_GCA_900319305.1	d__Bacteria;p__Bacteroidota;c__Bacteroidia;o__Bacteroidales;f__Bacteroidaceae;g__Prevotella;s__Prevotella sp900319305	blast	90	iPHoP-RF;78.30
RGVC384	GB_GCA_900319715.1	d__Bacteria;p__Bacteroidota;c__Bacteroidia;o__Bacteroidales;f__Bacteroidaceae;g__Prevotella;s__Prevotella sp900319715	blast	92.1	iPHoP-RF;74.80
RGVC384	GB_GCA_900322175.1	d__Bacteria;p__Bacteroidota;c__Bacteroidia;o__Bacteroidales;f__Bacteroidaceae;g__Prevotella;s__Prevotella sp900322175	blast	91.4	iPHoP-RF;69.30
RGVC384	GB_GCA_902761905.1	d__Bacteria;p__Bacteroidota;c__Bacteroidia;o__Bacteroidales;f__Bacteroidaceae;g__Prevotella;s__Prevotella sp902761905	blast	93.5	iPHoP-RF;87.00
RGVC384	GB_GCA_902798285.1	d__Bacteria;p__Bacteroidota;c__Bacteroidia;o__Bacteroidales;f__Bacteroidaceae;g__Prevotella;s__Prevotella sp902798285	blast	90	iPHoP-RF;80.80
RGVC384	GB_GCA_902799765.1	d__Bacteria;p__Bacteroidota;c__Bacteroidia;o__Bacteroidales;f__Bacteroidaceae;g__Prevotella;s__Prevotella sp902799765	blast	91	iPHoP-RF;79.00
RGVC384	GB_GCA_902800365.1	d__Bacteria;p__Bacteroidota;c__Bacteroidia;o__Bacteroidales;f__Bacteroidaceae;g__Prevotella;s__Prevotella sp902800365	blast	93.1	iPHoP-RF;75.90
RGVC384	RS_GCF_000025925.1	d__Bacteria;p__Bacteroidota;c__Bacteroidia;o__Bacteroidales;f__Bacteroidaceae;g__Prevotella;s__Prevotella ruminicola	blast	93.9	iPHoP-RF;78.00
RGVC384	RS_GCF_000619825.1	d__Bacteria;p__Bacteroidota;c__Bacteroidia;o__Bacteroidales;f__Bacteroidaceae;g__Prevotella;s__Prevotella sp000619825	blast	90.5	iPHoP-RF;70.90
RGVC384	RS_GCF_000687715.1	d__Bacteria;p__Bacteroidota;c__Bacteroidia;o__Bacteroidales;f__Bacteroidaceae;g__Prevotella;s__Prevotella ruminicola_B	blast	93.8	iPHoP-RF;77.30
RGVC384	RS_GCF_000702825.1	d__Bacteria;p__Bacteroidota;c__Bacteroidia;o__Bacteroidales;f__Bacteroidaceae;g__Prevotella;s__Prevotella sp000702825	blast	93.7	iPHoP-RF;83.90
RGVC384	RS_GCF_900107775.1	d__Bacteria;p__Bacteroidota;c__Bacteroidia;o__Bacteroidales;f__Bacteroidaceae;g__Prevotella;s__Prevotella ruminicola_C	blast	95	iPHoP-RF;80.00
RGVC384	RS_GCF_900142525.1	d__Bacteria;p__Bacteroidota;c__Bacteroidia;o__Bacteroidales;f__Bacteroidaceae;g__Prevotella;s__Prevotella ruminicola_A	blast	92.2	iPHoP-RF;81.40
RGVC386	2703719135	d__Bacteria;p__Firmicutes_A;c__Clostridia;o__Lachnospirales;f__Lachnospiraceae;g__Acetatifactor;s__	blast	91.8	iPHoP-RF;50.20
RGVC386	2703719137	d__Bacteria;p__Firmicutes_A;c__Clostridia;o__Lachnospirales;f__Lachnospiraceae;g__Acetatifactor;s__	blast	91.8	iPHoP-RF;66.30
RGVC386	3300010275_16	d__Bacteria;p__Firmicutes_A;c__Clostridia;o__Lachnospirales;f__Lachnospiraceae;g__Acetatifactor;s__	blast	92	iPHoP-RF;85.10
RGVC386	GB_GCA_000434615.1	d__Bacteria;p__Firmicutes_A;c__Clostridia;o__Lachnospirales;f__Lachnospiraceae;g__CAG-510;s__CAG-510 sp000434615	blast	91.2	iPHoP-RF;60.30
RGVC386	GB_GCA_002314715.1	d__Bacteria;p__Firmicutes_A;c__Clostridia;o__Lachnospirales;f__Lachnospiraceae;g__Acetatifactor;s__Acetatifactor sp002314715	blast	92	None
RGVC386	GB_GCA_002368865.1	d__Bacteria;p__Firmicutes_A;c__Clostridia;o__Lachnospirales;f__Lachnospiraceae;g__Acetatifactor;s__Acetatifactor sp002368865	blast	91.8	iPHoP-RF;58.40
RGVC386	GB_GCA_002432425.1	d__Bacteria;p__Firmicutes_A;c__Clostridia;o__Lachnospirales;f__Lachnospiraceae;g__CAG-510;s__CAG-510 sp002432425	blast	91.2	iPHoP-RF;60.30
RGVC386	GB_GCA_002490995.1	d__Bacteria;p__Firmicutes_A;c__Clostridia;o__Lachnospirales;f__Lachnospiraceae;g__Acetatifactor;s__Acetatifactor sp002490995	blast	91.8	None
RGVC386	GB_GCA_900550475.1	d__Bacteria;p__Firmicutes_A;c__Clostridia;o__Lachnospirales;f__Lachnospiraceae;g__CAG-510;s__CAG-510 sp900550475	blast	91.2	iPHoP-RF;69.30
RGVC386	GB_GCA_900554205.1	d__Bacteria;p__Firmicutes_A;c__Clostridia;o__Lachnospirales;f__Lachnospiraceae;g__Acetatifactor;s__Acetatifactor sp900554205	blast	92	iPHoP-RF;54.90
RGVC386	GB_GCA_902766425.1	d__Bacteria;p__Firmicutes_A;c__Clostridia;o__Lachnospirales;f__Lachnospiraceae;g__Acetatifactor;s__Acetatifactor sp902766425	blast	91.8	None
RGVC386	GB_GCA_902796105.1	d__Bacteria;p__Firmicutes_A;c__Clostridia;o__Lachnospirales;f__Lachnospiraceae;g__Acetatifactor;s__Acetatifactor sp902796105	blast	91.8	iPHoP-RF;57.90
RGVC386	RS_GCF_003584705.1	d__Bacteria;p__Firmicutes_A;c__Clostridia;o__Lachnospirales;f__Lachnospiraceae;g__Acetatifactor;s__Acetatifactor sp900066565	blast	96.6	iPHoP-RF;68.00
RGVC386	RS_GCF_011959105.1	d__Bacteria;p__Firmicutes_A;c__Clostridia;o__Lachnospirales;f__Lachnospiraceae;g__Acetatifactor;s__Acetatifactor sp011959105	blast	91.8	None
RGVC386	RS_GCF_900248245.1	d__Bacteria;p__Firmicutes_A;c__Clostridia;o__Lachnospirales;f__Lachnospiraceae;g__Acetatifactor;s__Acetatifactor muris	blast	91.8	None
RGVC388	GB_GCA_004558185.1	d__Bacteria;p__Firmicutes_A;c__Clostridia;o__Lachnospirales;f__Lachnospiraceae;g__SFDP01;s__SFDP01 sp004558185	blast	92.1	iPHoP-RF;66.30
RGVC389	GB_GCA_900770835.1	d__Bacteria;p__Bacteroidota;c__Bacteroidia;o__Bacteroidales;f__Tannerellaceae;g__Parabacteroides;s__Parabacteroides sp900770835	iPHoP-RF	90.1	None
RGVC389	RS_GCF_000012845.1	d__Bacteria;p__Bacteroidota;c__Bacteroidia;o__Bacteroidales;f__Tannerellaceae;g__Parabacteroides;s__Parabacteroides distasonis	blast	96.9	CRISPR;95.80 iPHoP-RF;93.70
RGVC389	RS_GCF_004793765.1	d__Bacteria;p__Bacteroidota;c__Bacteroidia;o__Bacteroidales;f__Tannerellaceae;g__Parabacteroides;s__Parabacteroides distasonis_A	iPHoP-RF	95.1	None
RGVC390	3300021326_31	d__Bacteria;p__Firmicutes_A;c__Clostridia;o__Oscillospirales;f__Oscillospiraceae;g__CAG-83;s__	blast	92	None
RGVC390	3300027276_32	d__Bacteria;p__Firmicutes_A;c__Clostridia;o__Oscillospirales;f__Oscillospiraceae;g__CAG-83;s__	blast	91.7	iPHoP-RF;68.40
RGVC390	3300029122_23	d__Bacteria;p__Firmicutes_A;c__Clostridia;o__Oscillospirales;f__Oscillospiraceae;g__CAG-83;s__	blast	91.9	iPHoP-RF;85.10
RGVC390	3300029127_29	d__Bacteria;p__Firmicutes_A;c__Clostridia;o__Oscillospirales;f__Oscillospiraceae;g__CAG-83;s__	blast	90.7	iPHoP-RF;87.30
RGVC390	3300029438_23	d__Bacteria;p__Firmicutes_A;c__Clostridia;o__Oscillospirales;f__Oscillospiraceae;g__CAG-83;s__	blast	91.1	iPHoP-RF;54.60
RGVC390	GB_GCA_000431575.1	d__Bacteria;p__Firmicutes_A;c__Clostridia;o__Oscillospirales;f__Oscillospiraceae;g__CAG-83;s__CAG-83 sp000431575	blast	90.5	iPHoP-RF;70.20
RGVC390	GB_GCA_000435555.1	d__Bacteria;p__Firmicutes_A;c__Clostridia;o__Oscillospirales;f__Oscillospiraceae;g__CAG-83;s__CAG-83 sp000435555	blast	96.8	iPHoP-RF;89.50
RGVC390	GB_GCA_000435975.1	d__Bacteria;p__Firmicutes_A;c__Clostridia;o__Oscillospirales;f__Oscillospiraceae;g__CAG-83;s__CAG-83 sp000435975	blast	91	iPHoP-RF;67.00
RGVC390	GB_GCA_001916855.1	d__Bacteria;p__Firmicutes_A;c__Clostridia;o__Oscillospirales;f__Oscillospiraceae;g__CAG-83;s__CAG-83 sp001916855	blast	91.1	iPHoP-RF;59.50
RGVC390	GB_GCA_002438575.1	d__Bacteria;p__Firmicutes_A;c__Clostridia;o__Oscillospirales;f__Oscillospiraceae;g__CAG-83;s__CAG-83 sp002438575	blast	91.3	iPHoP-RF;79.50
RGVC390	GB_GCA_003487665.1	d__Bacteria;p__Firmicutes_A;c__Clostridia;o__Oscillospirales;f__Oscillospiraceae;g__CAG-83;s__CAG-83 sp003487665	blast	91.4	iPHoP-RF;88.20
RGVC390	GB_GCA_003539495.1	d__Bacteria;p__Firmicutes_A;c__Clostridia;o__Oscillospirales;f__Oscillospiraceae;g__CAG-83;s__CAG-83 sp003539495	blast	91.1	iPHoP-RF;54.10
RGVC390	GB_GCA_004555205.1	d__Bacteria;p__Firmicutes_A;c__Clostridia;o__Oscillospirales;f__Oscillospiraceae;g__CAG-83;s__CAG-83 sp004555205	blast	90	iPHoP-RF;55.70
RGVC390	GB_GCA_004557655.1	d__Bacteria;p__Firmicutes_A;c__Clostridia;o__Oscillospirales;f__Oscillospiraceae;g__CAG-83;s__CAG-83 sp004557655	blast	91.1	iPHoP-RF;61.70
RGVC390	GB_GCA_900317425.1	d__Bacteria;p__Firmicutes_A;c__Clostridia;o__Oscillospirales;f__Oscillospiraceae;g__CAG-83;s__CAG-83 sp900317425	blast	93.8	iPHoP-RF;72.20
RGVC390	GB_GCA_900545495.1	d__Bacteria;p__Firmicutes_A;c__Clostridia;o__Oscillospirales;f__Oscillospiraceae;g__CAG-83;s__CAG-83 sp900545495	blast	92.1	iPHoP-RF;86.30
RGVC390	GB_GCA_900545585.1	d__Bacteria;p__Firmicutes_A;c__Clostridia;o__Oscillospirales;f__Oscillospiraceae;g__CAG-83;s__CAG-83 sp900545585	blast	91.9	iPHoP-RF;91.10
RGVC390	GB_GCA_900547745.1	d__Bacteria;p__Firmicutes_A;c__Clostridia;o__Oscillospirales;f__Oscillospiraceae;g__CAG-83;s__CAG-83 sp900547745	blast	91.9	iPHoP-RF;87.60
RGVC390	GB_GCA_900551995.1	d__Bacteria;p__Firmicutes_A;c__Clostridia;o__Oscillospirales;f__Oscillospiraceae;g__CAG-83;s__CAG-83 sp900551995	blast	91.3	iPHoP-RF;82.50
RGVC390	GB_GCA_900552725.1	d__Bacteria;p__Firmicutes_A;c__Clostridia;o__Oscillospirales;f__Oscillospiraceae;g__CAG-83;s__CAG-83 sp900552725	blast	91.2	iPHoP-RF;77.30
RGVC390	GB_GCA_900554275.1	d__Bacteria;p__Firmicutes_A;c__Clostridia;o__Oscillospirales;f__Oscillospiraceae;g__CAG-83;s__CAG-83 sp900554275	blast	91.3	iPHoP-RF;75.00
RGVC390	GB_GCA_900757415.1	d__Bacteria;p__Firmicutes_A;c__Clostridia;o__Oscillospirales;f__Oscillospiraceae;g__CAG-83;s__CAG-83 sp900757415	blast	91.2	iPHoP-RF;75.00
RGVC392	3300022660_71	d__Bacteria;p__Firmicutes_A;c__Clostridia_A;o__Christensenellales;f__CAG-74;g__Firm-11;s__	blast	90.9	None
RGVC393	GB_GCA_902761905.1	d__Bacteria;p__Bacteroidota;c__Bacteroidia;o__Bacteroidales;f__Bacteroidaceae;g__Prevotella;s__Prevotella sp902761905	blast	96.8	iPHoP-RF;63.50
RGVC393	GB_GCA_900317405.1	d__Bacteria;p__Bacteroidota;c__Bacteroidia;o__Bacteroidales;f__Bacteroidaceae;g__Prevotella;s__Prevotella sp900317405	blast	96.7	iPHoP-RF;66.00
RGVC393	RS_GCF_000702825.1	d__Bacteria;p__Bacteroidota;c__Bacteroidia;o__Bacteroidales;f__Bacteroidaceae;g__Prevotella;s__Prevotella sp000702825	blast	96.6	iPHoP-RF;67.30
RGVC393	GB_GCA_900314985.1	d__Bacteria;p__Bacteroidota;c__Bacteroidia;o__Bacteroidales;f__Bacteroidaceae;g__Prevotella;s__Prevotella sp900314985	blast	95.5	iPHoP-RF;68.40
RGVC393	RS_GCF_000312305.1	d__Bacteria;p__Bacteroidota;c__Bacteroidia;o__Bacteroidales;f__Bacteroidaceae;g__Prevotella;s__Prevotella conceptionensis	CRISPR	94	None
RGVC393	GB_GCA_900316265.1	d__Bacteria;p__Bacteroidota;c__Bacteroidia;o__Bacteroidales;f__Bacteroidaceae;g__Prevotella;s__Prevotella sp900316265	blast	92.7	iPHoP-RF;63.50
RGVC393	RS_GCF_000025925.1	d__Bacteria;p__Bacteroidota;c__Bacteroidia;o__Bacteroidales;f__Bacteroidaceae;g__Prevotella;s__Prevotella ruminicola	blast	91.8	iPHoP-RF;55.70
RGVC393	RS_GCF_000687715.1	d__Bacteria;p__Bacteroidota;c__Bacteroidia;o__Bacteroidales;f__Bacteroidaceae;g__Prevotella;s__Prevotella ruminicola_B	blast	91.6	iPHoP-RF;66.80
RGVC393	RS_GCF_900107775.1	d__Bacteria;p__Bacteroidota;c__Bacteroidia;o__Bacteroidales;f__Bacteroidaceae;g__Prevotella;s__Prevotella ruminicola_C	blast	91.5	iPHoP-RF;55.70
RGVC393	GB_GCA_902762565.1	d__Bacteria;p__Bacteroidota;c__Bacteroidia;o__Bacteroidales;f__Bacteroidaceae;g__Prevotella;s__Prevotella sp902762565	blast	91	iPHoP-RF;66.50
RGVC393	GB_GCA_902782305.1	d__Bacteria;p__Bacteroidota;c__Bacteroidia;o__Bacteroidales;f__Bacteroidaceae;g__Prevotella;s__Prevotella sp902782305	blast	90.5	iPHoP-RF;65.10
RGVC393	GB_GCA_900314755.1	d__Bacteria;p__Bacteroidota;c__Bacteroidia;o__Bacteroidales;f__Bacteroidaceae;g__Prevotella;s__Prevotella sp900314755	blast	90.4	iPHoP-RF;66.50
RGVC393	GB_GCA_002351725.1	d__Bacteria;p__Bacteroidota;c__Bacteroidia;o__Bacteroidales;f__Bacteroidaceae;g__Prevotella;s__Prevotella sp002351725	blast	90.3	iPHoP-RF;54.90
RGVC394	GB_GCA_000434635.1	d__Bacteria;p__Firmicutes_A;c__Clostridia;o__Oscillospirales;f__Oscillospiraceae;g__CAG-110;s__CAG-110 sp000434635	blast	96.4	iPHoP-RF;82.50
RGVC394	GB_GCA_900546075.1	d__Bacteria;p__Firmicutes_A;c__Clostridia;o__Oscillospirales;f__Oscillospiraceae;g__CAG-110;s__CAG-110 sp900546075	blast	91.6	iPHoP-RF;78.00
RGVC395	3300010259_5	d__Bacteria;p__Firmicutes_A;c__Clostridia;o__Oscillospirales;f__Oscillospiraceae;g__CAG-110;s__	blast	91.3	iPHoP-RF;56.80
RGVC395	3300022660_140	d__Bacteria;p__Firmicutes_A;c__Clostridia;o__Oscillospirales;f__Oscillospiraceae;g__CAG-110;s__	blast	91.4	iPHoP-RF;50.90
RGVC395	GB_GCA_000434635.1	d__Bacteria;p__Firmicutes_A;c__Clostridia;o__Oscillospirales;f__Oscillospiraceae;g__CAG-110;s__CAG-110 sp000434635	blast	91.1	iPHoP-RF;86.00
RGVC395	GB_GCA_002362625.1	d__Bacteria;p__Firmicutes_A;c__Clostridia;o__Oscillospirales;f__Oscillospiraceae;g__CAG-110;s__CAG-110 sp002362625	blast	90.7	iPHoP-RF;64.00
RGVC395	GB_GCA_002436765.1	d__Bacteria;p__Firmicutes_A;c__Clostridia;o__Oscillospirales;f__Oscillospiraceae;g__CAG-110;s__CAG-110 sp002436765	blast	91.9	iPHoP-RF;81.40
RGVC395	GB_GCA_002437585.1	d__Bacteria;p__Firmicutes_A;c__Clostridia;o__Oscillospirales;f__Oscillospiraceae;g__CAG-110;s__CAG-110 sp002437585	blast	92	iPHoP-RF;81.40
RGVC395	GB_GCA_002493965.1	d__Bacteria;p__Firmicutes_A;c__Clostridia;o__Oscillospirales;f__Oscillospiraceae;g__CAG-110;s__CAG-110 sp002493965	blast	90.7	iPHoP-RF;72.40
RGVC395	GB_GCA_004555705.1	d__Bacteria;p__Firmicutes_A;c__Clostridia;o__Oscillospirales;f__Oscillospiraceae;g__CAG-110;s__CAG-110 sp004555705	blast	92	None
RGVC395	GB_GCA_900540635.1	d__Bacteria;p__Firmicutes_A;c__Clostridia;o__Oscillospirales;f__Oscillospiraceae;g__CAG-110;s__CAG-110 sp900540635	blast	91.3	iPHoP-RF;58.40
RGVC395	GB_GCA_900544405.1	d__Bacteria;p__Firmicutes_A;c__Clostridia;o__Oscillospirales;f__Oscillospiraceae;g__CAG-110;s__CAG-110 sp900544405	blast	91.4	None
RGVC395	GB_GCA_900544945.1	d__Bacteria;p__Firmicutes_A;c__Clostridia;o__Oscillospirales;f__Oscillospiraceae;g__CAG-110;s__CAG-110 sp900544945	blast	92	iPHoP-RF;75.00
RGVC395	GB_GCA_900546075.1	d__Bacteria;p__Firmicutes_A;c__Clostridia;o__Oscillospirales;f__Oscillospiraceae;g__CAG-110;s__CAG-110 sp900546075	blast	91.8	iPHoP-RF;86.00
RGVC395	GB_GCA_900547405.1	d__Bacteria;p__Firmicutes_A;c__Clostridia;o__Oscillospirales;f__Oscillospiraceae;g__CAG-110;s__CAG-110 sp900547405	blast	91.3	iPHoP-RF;68.60
RGVC395	GB_GCA_900553805.1	d__Bacteria;p__Firmicutes_A;c__Clostridia;o__Oscillospirales;f__Oscillospiraceae;g__CAG-110;s__CAG-110 sp900553805	blast	93.9	iPHoP-RF;67.70
RGVC395	GB_GCA_900554625.1	d__Bacteria;p__Firmicutes_A;c__Clostridia;o__Oscillospirales;f__Oscillospiraceae;g__CAG-110;s__CAG-110 sp900554625	blast	90.4	iPHoP-RF;65.80
RGVC395	GB_GCA_900556935.1	d__Bacteria;p__Firmicutes_A;c__Clostridia;o__Oscillospirales;f__Oscillospiraceae;g__CAG-110;s__CAG-110 sp900556935	blast	91.3	iPHoP-RF;54.60
RGVC395	GB_GCA_900762245.1	d__Bacteria;p__Firmicutes_A;c__Clostridia;o__Oscillospirales;f__Oscillospiraceae;g__CAG-110;s__CAG-110 sp900762245	blast	92	iPHoP-RF;79.80
RGVC395	GB_GCA_900763965.1	d__Bacteria;p__Firmicutes_A;c__Clostridia;o__Oscillospirales;f__Oscillospiraceae;g__CAG-110;s__CAG-110 sp900763965	blast	92	iPHoP-RF;79.30
RGVC395	GB_GCA_900769845.1	d__Bacteria;p__Firmicutes_A;c__Clostridia;o__Oscillospirales;f__Oscillospiraceae;g__CAG-110;s__CAG-110 sp900769845	blast	91.3	None
RGVC395	GB_GCA_900770015.1	d__Bacteria;p__Firmicutes_A;c__Clostridia;o__Oscillospirales;f__Oscillospiraceae;g__CAG-110;s__CAG-110 sp900770015	blast	90.6	iPHoP-RF;59.20
RGVC396	RS_GCF_900104665.1	d__Bacteria;p__Firmicutes;c__Bacilli;o__Erysipelotrichales;f__Erysipelotrichaceae;g__Traorella;s__Traorella massiliensis	blast	93.6	None
RGVC396	RS_GCF_000154285.1	d__Bacteria;p__Firmicutes;c__Bacilli;o__Erysipelotrichales;f__Erysipelotrichaceae;g__Amedibacillus;s__Amedibacillus dolichus	blast	91.7	None
RGVC396	RS_GCF_004341945.1	d__Bacteria;p__Firmicutes;c__Bacilli;o__Erysipelotrichales;f__Erysipelotrichaceae;g__Longicatena;s__Longicatena caecimuris	blast	90.4	None
RGVC397	GB_GCA_002361215.1	d__Bacteria;p__Bacteroidota;c__Bacteroidia;o__Bacteroidales;f__Muribaculaceae;g__CAG-485;s__CAG-485 sp002361215	blast	92.1	iPHoP-RF;65.80
RGVC397	RS_GCF_900761855.1	d__Bacteria;p__Bacteroidota;c__Bacteroidia;o__Bacteroidales;f__Muribaculaceae;g__CAG-485;s__CAG-485 sp900761855	blast	91.8	None
RGVC399	GB_GCA_900318745.1	d__Bacteria;p__Firmicutes_A;c__Clostridia_A;o__Christensenellales;f__CAG-138;g__UBA3792;s__UBA3792 sp900318745	blast	92.4	iPHoP-RF;79.50
RGVC399	RS_GCF_900769075.1	d__Bacteria;p__Firmicutes_A;c__Clostridia_A;o__Christensenellales;f__CAG-74;g__UBA11524;s__UBA11524 sp900769075	blast	90.7	iPHoP-RF;82.20
RGVC400	RS_GCF_000026225.1	d__Bacteria;p__Proteobacteria;c__Gammaproteobacteria;o__Enterobacterales;f__Enterobacteriaceae;g__Escherichia;s__Escherichia fergusonii	blast	96.8	iPHoP-RF;78.70
RGVC400	RS_GCF_000026325.1	d__Bacteria;p__Proteobacteria;c__Gammaproteobacteria;o__Enterobacterales;f__Enterobacteriaceae;g__Escherichia;s__Escherichia coli_D	blast	96.8	iPHoP-RF;90.10
RGVC400	RS_GCF_000208585.1	d__Bacteria;p__Proteobacteria;c__Gammaproteobacteria;o__Enterobacterales;f__Enterobacteriaceae;g__Escherichia;s__Escherichia sp000208585	blast	96.6	iPHoP-RF;78.50
RGVC400	RS_GCF_000759775.1	d__Bacteria;p__Proteobacteria;c__Gammaproteobacteria;o__Enterobacterales;f__Enterobacteriaceae;g__Escherichia;s__Escherichia albertii	blast	96.7	iPHoP-RF;77.30
RGVC400	RS_GCF_002900365.1	d__Bacteria;p__Proteobacteria;c__Gammaproteobacteria;o__Enterobacterales;f__Enterobacteriaceae;g__Escherichia;s__Escherichia marmotae	blast	96.7	iPHoP-RF;81.60
RGVC400	RS_GCF_002949675.1	d__Bacteria;p__Proteobacteria;c__Gammaproteobacteria;o__Enterobacterales;f__Enterobacteriaceae;g__Escherichia;s__Escherichia dysenteriae	blast	96.8	iPHoP-RF;84.80
RGVC400	RS_GCF_002950215.1	d__Bacteria;p__Proteobacteria;c__Gammaproteobacteria;o__Enterobacterales;f__Enterobacteriaceae;g__Escherichia;s__Escherichia flexneri	blast	96.8	iPHoP-RF;88.50
RGVC400	RS_GCF_003697165.2	d__Bacteria;p__Proteobacteria;c__Gammaproteobacteria;o__Enterobacterales;f__Enterobacteriaceae;g__Escherichia;s__Escherichia coli	blast	96.8	iPHoP-RF;89.80
RGVC401	GB_GCA_900539455.1	d__Bacteria;p__Firmicutes_A;c__Clostridia;o__Lachnospirales;f__Lachnospiraceae;g__CAG-303;s__CAG-303 sp900539455	blast	93.2	None
RGVC401	GB_GCA_000437755.1	d__Bacteria;p__Firmicutes_A;c__Clostridia;o__Lachnospirales;f__Lachnospiraceae;g__CAG-303;s__CAG-303 sp000437755	blast	90.6	None
RGVC401	GB_GCA_012520815.1	d__Bacteria;p__Firmicutes_A;c__Clostridia;o__Lachnospirales;f__Lachnospiraceae;g__CAG-303;s__CAG-303 sp012520815	blast	90.2	None
RGVC402	RS_GCF_900769565.1	d__Bacteria;p__Firmicutes_A;c__Clostridia_A;o__Christensenellales;f__Borkfalkiaceae;g__UBA1259;s__UBA1259 sp900769565	blast	94.8	iPHoP-RF;72.20
RGVC402	3300022660_169	d__Bacteria;p__Firmicutes_A;c__Clostridia_A;o__Christensenellales;f__Borkfalkiaceae;g__UBA1259;s__	blast	93.8	iPHoP-RF;58.20
RGVC402	GB_GCA_902767225.1	d__Bacteria;p__Firmicutes_A;c__Clostridia_A;o__Christensenellales;f__Borkfalkiaceae;g__UBA1259;s__UBA1259 sp902767225	blast	92	None
RGVC402	RS_GCF_900771345.1	d__Bacteria;p__Firmicutes_A;c__Clostridia_A;o__Christensenellales;f__Borkfalkiaceae;g__UBA1259;s__UBA1259 sp900771345	blast	91.8	None
RGVC403	RS_GCF_000239295.1	d__Bacteria;p__Firmicutes_A;c__Clostridia;o__Oscillospirales;f__Oscillospiraceae;g__Flavonifractor;s__Flavonifractor plautii	blast	96.9	iPHoP-RF;80.60
RGVC403	RS_GCF_000508885.1	d__Bacteria;p__Firmicutes_A;c__Clostridia;o__Oscillospirales;f__Oscillospiraceae;g__Flavonifractor;s__Flavonifractor sp000508885	blast	96.7	iPHoP-RF;71.30
RGVC403	RS_GCF_002159455.1	d__Bacteria;p__Firmicutes_A;c__Clostridia;o__Oscillospirales;f__Oscillospiraceae;g__Flavonifractor;s__Flavonifractor sp002159455	blast	90.8	iPHoP-RF;72.60
RGVC403	RS_GCF_900626285.1	d__Bacteria;p__Firmicutes_A;c__Clostridia;o__Oscillospirales;f__Oscillospiraceae;g__Flavonifractor;s__Flavonifractor massiliensis_A	blast	91.8	iPHoP-RF;55.20
RGVC406	GB_GCA_000437915.1	d__Bacteria;p__Firmicutes_A;c__Clostridia_A;o__Christensenellales;f__CAG-314;g__CAG-314;s__CAG-314 sp000437915	blast	93.2	iPHoP-RF;64.80
RGVC406	GB_GCA_002438625.1	d__Bacteria;p__Firmicutes_A;c__Clostridia_A;o__Christensenellales;f__UBA1242;g__UBA4647;s__UBA4647 sp002438625	blast	90.4	None
RGVC407	GB_GCA_000434635.1	d__Bacteria;p__Firmicutes_A;c__Clostridia;o__Oscillospirales;f__Oscillospiraceae;g__CAG-110;s__CAG-110 sp000434635	blast	96.9	iPHoP-RF;59.00
RGVC407	3300010259_5	d__Bacteria;p__Firmicutes_A;c__Clostridia;o__Oscillospirales;f__Oscillospiraceae;g__CAG-110;s__	blast	93.7	None
RGVC407	GB_GCA_900546075.1	d__Bacteria;p__Firmicutes_A;c__Clostridia;o__Oscillospirales;f__Oscillospiraceae;g__CAG-110;s__CAG-110 sp900546075	blast	90.1	iPHoP-RF;56.20
RGVC409	GB_GCA_014385025.1	d__Bacteria;p__Firmicutes_A;c__Clostridia;o__Oscillospirales;f__Ruminococcaceae;g__D5;s__D5 sp014385025	CRISPR	96.2	blast;94.40 iPHoP-RF;74.80
RGVC409	RS_GCF_900113995.1	d__Bacteria;p__Firmicutes_A;c__Clostridia;o__Oscillospirales;f__Ruminococcaceae;g__D5;s__D5 sp900113995	CRISPR	98.9	blast;97.90 iPHoP-RF;76.10
RGVC411	GB_GCA_000431335.1	d__Bacteria;p__Firmicutes_A;c__Clostridia;o__TANB77;f__CAG-508;g__CAG-269;s__CAG-269 sp000431335	blast	91.3	None
RGVC412	3300022377_6	d__Bacteria;p__Bacteroidota;c__Bacteroidia;o__Bacteroidales;f__Bacteroidaceae;g__Phocaeicola;s__	blast	92	None
RGVC412	RS_GCF_900108345.1	d__Bacteria;p__Bacteroidota;c__Bacteroidia;o__Bacteroidales;f__Bacteroidaceae;g__Bacteroides;s__Bacteroides ndongoniae	blast	91.2	iPHoP-RF;57.60
RGVC413	GB_GCA_900546275.1	d__Bacteria;p__Firmicutes;c__Bacilli;o__RF39;f__UBA660;g__UBA3631;s__UBA3631 sp900546275	blast	91.7	None
RGVC414	GB_GCA_000434635.1	d__Bacteria;p__Firmicutes_A;c__Clostridia;o__Oscillospirales;f__Oscillospiraceae;g__CAG-110;s__CAG-110 sp000434635	blast	96.9	iPHoP-RF;72.60
RGVC414	GB_GCA_900546075.1	d__Bacteria;p__Firmicutes_A;c__Clostridia;o__Oscillospirales;f__Oscillospiraceae;g__CAG-110;s__CAG-110 sp900546075	blast	91.1	iPHoP-RF;62.50
RGVC415	GB_GCA_900317685.1	d__Bacteria;p__Bacteroidota;c__Bacteroidia;o__Bacteroidales;f__Bacteroidaceae;g__Prevotella;s__Prevotella sp900317685	CRISPR	94.7	iPHoP-RF;54.40
RGVC416	GB_GCA_001916215.1	d__Bacteria;p__Firmicutes;c__Bacilli;o__Acholeplasmatales;f__Anaeroplasmataceae;g__CAG-307;s__CAG-307 sp001916215	blast	92.1	None
RGVC417	GB_GCA_003448195.1	d__Bacteria;p__Firmicutes_A;c__Clostridia_A;o__Christensenellales;f__Borkfalkiaceae;g__UBA7597;s__UBA7597 sp003448195	blast	91.9	iPHoP-RF;73.50
RGVC417	GB_GCA_900542935.1	d__Bacteria;p__Firmicutes_A;c__Clostridia_A;o__Christensenellales;f__Borkfalkiaceae;g__UBA7597;s__UBA7597 sp900542935	blast	96.8	iPHoP-RF;85.10
RGVC418	3300022660_140	d__Bacteria;p__Firmicutes_A;c__Clostridia;o__Oscillospirales;f__Oscillospiraceae;g__CAG-110;s__	blast	90.3	None
RGVC418	GB_GCA_000434635.1	d__Bacteria;p__Firmicutes_A;c__Clostridia;o__Oscillospirales;f__Oscillospiraceae;g__CAG-110;s__CAG-110 sp000434635	blast	90.8	iPHoP-RF;58.40
RGVC418	GB_GCA_002362625.1	d__Bacteria;p__Firmicutes_A;c__Clostridia;o__Oscillospirales;f__Oscillospiraceae;g__CAG-110;s__CAG-110 sp002362625	blast	92	iPHoP-RF;59.20
RGVC418	GB_GCA_002436765.1	d__Bacteria;p__Firmicutes_A;c__Clostridia;o__Oscillospirales;f__Oscillospiraceae;g__CAG-110;s__CAG-110 sp002436765	blast	91.2	iPHoP-RF;64.50
RGVC418	GB_GCA_002437585.1	d__Bacteria;p__Firmicutes_A;c__Clostridia;o__Oscillospirales;f__Oscillospiraceae;g__CAG-110;s__CAG-110 sp002437585	blast	90.5	None
RGVC418	GB_GCA_002493965.1	d__Bacteria;p__Firmicutes_A;c__Clostridia;o__Oscillospirales;f__Oscillospiraceae;g__CAG-110;s__CAG-110 sp002493965	blast	90.9	iPHoP-RF;58.20
RGVC418	GB_GCA_004555705.1	d__Bacteria;p__Firmicutes_A;c__Clostridia;o__Oscillospirales;f__Oscillospiraceae;g__CAG-110;s__CAG-110 sp004555705	blast	90.6	None
RGVC418	GB_GCA_900540635.1	d__Bacteria;p__Firmicutes_A;c__Clostridia;o__Oscillospirales;f__Oscillospiraceae;g__CAG-110;s__CAG-110 sp900540635	blast	90.2	None
RGVC418	GB_GCA_900544405.1	d__Bacteria;p__Firmicutes_A;c__Clostridia;o__Oscillospirales;f__Oscillospiraceae;g__CAG-110;s__CAG-110 sp900544405	blast	90.3	None
RGVC418	GB_GCA_900544945.1	d__Bacteria;p__Firmicutes_A;c__Clostridia;o__Oscillospirales;f__Oscillospiraceae;g__CAG-110;s__CAG-110 sp900544945	blast	90.3	None
RGVC418	GB_GCA_900546075.1	d__Bacteria;p__Firmicutes_A;c__Clostridia;o__Oscillospirales;f__Oscillospiraceae;g__CAG-110;s__CAG-110 sp900546075	blast	91.1	iPHoP-RF;65.60
RGVC418	GB_GCA_900547405.1	d__Bacteria;p__Firmicutes_A;c__Clostridia;o__Oscillospirales;f__Oscillospiraceae;g__CAG-110;s__CAG-110 sp900547405	blast	90.2	None
RGVC418	GB_GCA_900549495.1	d__Bacteria;p__Firmicutes_A;c__Clostridia;o__Oscillospirales;f__Oscillospiraceae;g__CAG-110;s__CAG-110 sp900549495	blast	90.2	None
RGVC418	GB_GCA_900554625.1	d__Bacteria;p__Firmicutes_A;c__Clostridia;o__Oscillospirales;f__Oscillospiraceae;g__CAG-110;s__CAG-110 sp900554625	blast	92.1	None
RGVC418	GB_GCA_900762245.1	d__Bacteria;p__Firmicutes_A;c__Clostridia;o__Oscillospirales;f__Oscillospiraceae;g__CAG-110;s__CAG-110 sp900762245	blast	93.5	None
RGVC418	GB_GCA_900763965.1	d__Bacteria;p__Firmicutes_A;c__Clostridia;o__Oscillospirales;f__Oscillospiraceae;g__CAG-110;s__CAG-110 sp900763965	blast	91.2	None
RGVC418	GB_GCA_900769835.1	d__Bacteria;p__Firmicutes_A;c__Clostridia;o__Oscillospirales;f__Oscillospiraceae;g__CAG-110;s__CAG-110 sp900769835	blast	90.3	None
RGVC418	GB_GCA_900769845.1	d__Bacteria;p__Firmicutes_A;c__Clostridia;o__Oscillospirales;f__Oscillospiraceae;g__CAG-110;s__CAG-110 sp900769845	blast	90.2	None
RGVC418	GB_GCA_900770015.1	d__Bacteria;p__Firmicutes_A;c__Clostridia;o__Oscillospirales;f__Oscillospiraceae;g__CAG-110;s__CAG-110 sp900770015	blast	90.2	None
RGVC420	GB_GCA_900551855.1	d__Bacteria;p__Firmicutes_A;c__Clostridia_A;o__Christensenellales;f__UBA1242;g__UBA11517;s__UBA11517 sp900551855	blast	93.4	None
RGVC420	RS_GCF_900753315.1	d__Bacteria;p__Firmicutes_A;c__Clostridia_A;o__Christensenellales;f__UBA1242;g__UBA11517;s__UBA11517 sp900753315	blast	92.1	None
RGVC420	RS_GCF_900768545.1	d__Bacteria;p__Firmicutes_A;c__Clostridia_A;o__Christensenellales;f__UBA1242;g__UBA11517;s__UBA11517 sp900768545	blast	91.8	None
RGVC421	GB_GCA_902799355.1	d__Bacteria;p__Bacteroidota;c__Bacteroidia;o__Bacteroidales;f__Bacteroidaceae;g__Prevotella;s__Prevotella sp902799355	blast	96.9	iPHoP-RF;91.80
RGVC421	GB_GCA_900314985.1	d__Bacteria;p__Bacteroidota;c__Bacteroidia;o__Bacteroidales;f__Bacteroidaceae;g__Prevotella;s__Prevotella sp900314985	blast	96.8	iPHoP-RF;90.50
RGVC421	GB_GCA_900316265.1	d__Bacteria;p__Bacteroidota;c__Bacteroidia;o__Bacteroidales;f__Bacteroidaceae;g__Prevotella;s__Prevotella sp900316265	blast	96.7	iPHoP-RF;92.40
RGVC421	GB_GCA_902800925.1	d__Bacteria;p__Bacteroidota;c__Bacteroidia;o__Bacteroidales;f__Bacteroidaceae;g__Prevotella;s__Prevotella sp902800925	blast	96.7	iPHoP-RF;87.30
RGVC421	RS_GCF_000702825.1	d__Bacteria;p__Bacteroidota;c__Bacteroidia;o__Bacteroidales;f__Bacteroidaceae;g__Prevotella;s__Prevotella sp000702825	blast	96.6	iPHoP-RF;71.30
RGVC421	GB_GCA_902761905.1	d__Bacteria;p__Bacteroidota;c__Bacteroidia;o__Bacteroidales;f__Bacteroidaceae;g__Prevotella;s__Prevotella sp902761905	blast	92.9	iPHoP-RF;68.40
RGVC421	RS_GCF_000025925.1	d__Bacteria;p__Bacteroidota;c__Bacteroidia;o__Bacteroidales;f__Bacteroidaceae;g__Prevotella;s__Prevotella ruminicola	blast	92	iPHoP-RF;56.80
RGVC421	RS_GCF_900107775.1	d__Bacteria;p__Bacteroidota;c__Bacteroidia;o__Bacteroidales;f__Bacteroidaceae;g__Prevotella;s__Prevotella ruminicola_C	blast	91.9	iPHoP-RF;56.50
RGVC421	RS_GCF_000687715.1	d__Bacteria;p__Bacteroidota;c__Bacteroidia;o__Bacteroidales;f__Bacteroidaceae;g__Prevotella;s__Prevotella ruminicola_B	blast	91.8	iPHoP-RF;71.70
RGVC421	GB_GCA_900317405.1	d__Bacteria;p__Bacteroidota;c__Bacteroidia;o__Bacteroidales;f__Bacteroidaceae;g__Prevotella;s__Prevotella sp900317405	blast	91.7	iPHoP-RF;69.10
RGVC421	GB_GCA_902778255.1	d__Bacteria;p__Bacteroidota;c__Bacteroidia;o__Bacteroidales;f__Bacteroidaceae;g__Prevotella;s__Prevotella sp902778255	blast	91.3	None
RGVC421	RS_GCF_900100635.1	d__Bacteria;p__Bacteroidota;c__Bacteroidia;o__Bacteroidales;f__Bacteroidaceae;g__Prevotella;s__Prevotella sp900100635	blast	91	iPHoP-RF;75.00
RGVC421	RS_GCF_900142525.1	d__Bacteria;p__Bacteroidota;c__Bacteroidia;o__Bacteroidales;f__Bacteroidaceae;g__Prevotella;s__Prevotella ruminicola_A	blast	91	iPHoP-RF;66.00
RGVC421	GB_GCA_902785695.1	d__Bacteria;p__Bacteroidota;c__Bacteroidia;o__Bacteroidales;f__Bacteroidaceae;g__Prevotella;s__Prevotella sp902785695	blast	90.9	None
RGVC421	RS_GCF_900119285.1	d__Bacteria;p__Bacteroidota;c__Bacteroidia;o__Bacteroidales;f__Bacteroidaceae;g__Prevotella;s__Prevotella sp900119285	blast	90.8	iPHoP-RF;79.50
RGVC421	GB_GCA_902772585.1	d__Bacteria;p__Bacteroidota;c__Bacteroidia;o__Bacteroidales;f__Bacteroidaceae;g__Prevotella;s__Prevotella sp902772585	blast	90.6	iPHoP-RF;84.20
RGVC421	GB_GCA_902799975.1	d__Bacteria;p__Bacteroidota;c__Bacteroidia;o__Bacteroidales;f__Bacteroidaceae;g__Prevotella;s__Prevotella sp902799975	blast	90.4	None
RGVC423	RS_GCF_003865035.1	d__Bacteria;p__Firmicutes_A;c__Clostridia;o__Lachnospirales;f__Anaerotignaceae;g__Anaerotignum;s__Anaerotignum faecicola	blast	90.2	None
RGVC424	RS_GCF_004154955.1	d__Bacteria;p__Firmicutes_A;c__Clostridia;o__Oscillospirales;f__Oscillospiraceae;g__Intestinimonas;s__Intestinimonas butyriciproducens	blast	92.7	iPHoP-RF;62.70
RGVC425	GB_GCA_002436765.1	d__Bacteria;p__Firmicutes_A;c__Clostridia;o__Oscillospirales;f__Oscillospiraceae;g__CAG-110;s__CAG-110 sp002436765	blast	90.2	iPHoP-RF;65.30
RGVC425	GB_GCA_004555705.1	d__Bacteria;p__Firmicutes_A;c__Clostridia;o__Oscillospirales;f__Oscillospiraceae;g__CAG-110;s__CAG-110 sp004555705	blast	91.4	iPHoP-RF;65.10
RGVC425	GB_GCA_900546075.1	d__Bacteria;p__Firmicutes_A;c__Clostridia;o__Oscillospirales;f__Oscillospiraceae;g__CAG-110;s__CAG-110 sp900546075	blast	90.8	iPHoP-RF;74.30
RGVC425	GB_GCA_900549705.1	d__Bacteria;p__Firmicutes_A;c__Clostridia;o__Oscillospirales;f__Oscillospiraceae;g__CAG-110;s__CAG-110 sp900549705	blast	91.9	iPHoP-RF;61.40
RGVC425	GB_GCA_900762245.1	d__Bacteria;p__Firmicutes_A;c__Clostridia;o__Oscillospirales;f__Oscillospiraceae;g__CAG-110;s__CAG-110 sp900762245	blast	92.1	None
RGVC425	GB_GCA_900763965.1	d__Bacteria;p__Firmicutes_A;c__Clostridia;o__Oscillospirales;f__Oscillospiraceae;g__CAG-110;s__CAG-110 sp900763965	blast	93.1	iPHoP-RF;68.40
RGVC425	GB_GCA_900769845.1	d__Bacteria;p__Firmicutes_A;c__Clostridia;o__Oscillospirales;f__Oscillospiraceae;g__CAG-110;s__CAG-110 sp900769845	blast	91.8	None
RGVC425	GB_GCA_900770015.1	d__Bacteria;p__Firmicutes_A;c__Clostridia;o__Oscillospirales;f__Oscillospiraceae;g__CAG-110;s__CAG-110 sp900770015	blast	90	iPHoP-RF;68.40
RGVC427	GB_GCA_902800625.1	d__Bacteria;p__Firmicutes_A;c__Clostridia_A;o__Christensenellales;f__CAG-74;g__UBA2862;s__UBA2862 sp902800625	blast	96.6	None
RGVC427	GB_GCA_902799045.1	d__Bacteria;p__Firmicutes_A;c__Clostridia_A;o__Christensenellales;f__CAG-74;g__UBA2862;s__UBA2862 sp902799045	blast	95.7	None
RGVC427	GB_GCA_900315585.1	d__Bacteria;p__Firmicutes_A;c__Clostridia_A;o__Christensenellales;f__CAG-74;g__UBA2862;s__UBA2862 sp900315585	blast	95.2	iPHoP-RF;53.60
RGVC427	GB_GCA_902793325.1	d__Bacteria;p__Firmicutes_A;c__Clostridia_A;o__Christensenellales;f__CAG-74;g__UBA2862;s__UBA2862 sp902793325	blast	93.6	None
RGVC427	GB_GCA_900553265.1	d__Bacteria;p__Firmicutes_A;c__Clostridia_A;o__Christensenellales;f__CAG-74;g__UMGS1603;s__UMGS1603 sp900553265	blast	91.7	None
RGVC427	GB_GCA_902765735.1	d__Bacteria;p__Firmicutes_A;c__Clostridia_A;o__Christensenellales;f__CAG-74;g__UBA2862;s__UBA2862 sp002350605	blast	91.7	None
RGVC427	GB_GCA_902790525.1	d__Bacteria;p__Firmicutes_A;c__Clostridia_A;o__Christensenellales;f__CAG-74;g__UBA2862;s__UBA2862 sp902790525	blast	91.5	None
RGVC427	GB_GCA_902798105.1	d__Bacteria;p__Firmicutes_A;c__Clostridia_A;o__Christensenellales;f__CAG-74;g__UBA2862;s__UBA2862 sp902798105	blast	90.7	iPHoP-RF;53.30
RGVC427	GB_GCA_902765395.1	d__Bacteria;p__Firmicutes_A;c__Clostridia_A;o__Christensenellales;f__CAG-74;g__UBA2862;s__UBA2862 sp902765395	blast	90.3	None
RGVC429	RS_GCF_000492175.1	d__Bacteria;p__Firmicutes_A;c__Clostridia;o__Oscillospirales;f__Oscillospiraceae;g__Lawsonibacter;s__Lawsonibacter sp000492175	blast	92.8	None
RGVC429	RS_GCF_002910915.1	d__Bacteria;p__Actinobacteriota;c__Actinomycetia;o__Streptomycetales;f__Streptomycetaceae;g__Streptomyces;s__Streptomyces sp002910915	blast	96.8	None
RGVC430	GB_GCA_902767365.1	d__Bacteria;p__Firmicutes;c__Bacilli;o__RF39;f__UBA660;g__RUG13868;s__RUG13868 sp902767365	blast	90.6	None
RGVC430	GB_GCA_902793375.1	d__Bacteria;p__Firmicutes;c__Bacilli;o__RF39;f__UBA660;g__RUG13868;s__RUG13868 sp902793375	blast	92	None
RGVC431	GB_GCA_902776615.1	d__Bacteria;p__Verrucomicrobiota;c__Kiritimatiellae;o__RFP12;f__UBA1067;g__UBA1067;s__UBA1067 sp902776615	blast	91.7	None
RGVC431	GB_GCA_902799955.1	d__Bacteria;p__Verrucomicrobiota;c__Kiritimatiellae;o__RFP12;f__UBA1067;g__UBA1067;s__UBA1067 sp902799955	blast	91	iPHoP-RF;74.60
RGVC431	GB_GCA_902802945.1	d__Bacteria;p__Verrucomicrobiota;c__Kiritimatiellae;o__RFP12;f__UBA1067;g__RUG572;s__RUG572 sp902802945	blast	90.7	None
RGVC432	GB_GCA_002361215.1	d__Bacteria;p__Bacteroidota;c__Bacteroidia;o__Bacteroidales;f__Muribaculaceae;g__CAG-485;s__CAG-485 sp002361215	blast	90.6	None
RGVC432	GB_GCA_900549375.1	d__Bacteria;p__Bacteroidota;c__Bacteroidia;o__Bacteroidales;f__Muribaculaceae;g__CAG-485;s__CAG-485 sp900549375	blast	90	None
RGVC432	RS_GCF_900760735.1	d__Bacteria;p__Bacteroidota;c__Bacteroidia;o__Bacteroidales;f__Muribaculaceae;g__CAG-485;s__CAG-485 sp900760735	blast	91.7	None
RGVC432	RS_GCF_900761855.1	d__Bacteria;p__Bacteroidota;c__Bacteroidia;o__Bacteroidales;f__Muribaculaceae;g__CAG-485;s__CAG-485 sp900761855	blast	91.8	None
RGVC433	3300022377_6	d__Bacteria;p__Bacteroidota;c__Bacteroidia;o__Bacteroidales;f__Bacteroidaceae;g__Phocaeicola;s__	blast	93.9	None
RGVC433	GB_GCA_900551065.1	d__Bacteria;p__Bacteroidota;c__Bacteroidia;o__Bacteroidales;f__Bacteroidaceae;g__Phocaeicola;s__Phocaeicola sp900551065	blast	90.7	iPHoP-RF;79.80
RGVC433	GB_GCA_900551445.1	d__Bacteria;p__Bacteroidota;c__Bacteroidia;o__Bacteroidales;f__Bacteroidaceae;g__Phocaeicola;s__Phocaeicola sp900551445	blast	91.6	iPHoP-RF;78.70
RGVC433	RS_GCF_000190575.1	d__Bacteria;p__Bacteroidota;c__Bacteroidia;o__Bacteroidales;f__Bacteroidaceae;g__Phocaeicola;s__Phocaeicola salanitronis	blast	90.7	None
RGVC433	RS_GCF_900128455.1	d__Bacteria;p__Bacteroidota;c__Bacteroidia;o__Bacteroidales;f__Bacteroidaceae;g__Phocaeicola;s__Phocaeicola mediterraneensis	blast	91.7	iPHoP-RF;80.30
RGVC433	RS_GCF_902362595.1	d__Bacteria;p__Bacteroidota;c__Bacteroidia;o__Bacteroidales;f__Bacteroidaceae;g__Phocaeicola;s__Phocaeicola sp900066455	blast	90.7	iPHoP-RF;71.10
RGVC434	3300010280_28	d__Bacteria;p__Firmicutes_A;c__Clostridia;o__Oscillospirales;f__Ruminococcaceae;g__Ruminiclostridium_E;s__	blast	93.8	None
RGVC434	GB_GCA_002363155.1	d__Bacteria;p__Firmicutes_A;c__Clostridia;o__Oscillospirales;f__Ruminococcaceae;g__Ruminiclostridium_E;s__Ruminiclostridium_E sp002363155	blast	91.1	None
RGVC434	GB_GCA_900556525.1	d__Bacteria;p__Firmicutes_A;c__Clostridia;o__Oscillospirales;f__Ruminococcaceae;g__Ruminiclostridium_E;s__Ruminiclostridium_E sp900556525	blast	92.1	None
RGVC434	GB_GCA_902780695.1	d__Bacteria;p__Firmicutes_A;c__Clostridia;o__Oscillospirales;f__Ruminococcaceae;g__Ruminiclostridium_E;s__Ruminiclostridium_E sp902780695	blast	91.6	None
RGVC435	RS_GCF_003611805.1	d__Bacteria;p__Firmicutes_A;c__Clostridia;o__Lachnospirales;f__Lachnospiraceae;g__UBA3282;s__UBA3282 sp003611805	blast	96.2	iPHoP-RF;71.50
RGVC436	3300008622_32	d__Bacteria;p__Firmicutes_A;c__Clostridia_A;o__Christensenellales;f__Borkfalkiaceae;g__QALS01;s__	blast	93.9	iPHoP-RF;72.80
RGVC436	3300018475_172	d__Bacteria;p__Firmicutes_A;c__Clostridia_A;o__Christensenellales;f__Borkfalkiaceae;g__QALS01;s__	blast	96.9	iPHoP-RF;65.60
RGVC436	3300022660_143	d__Bacteria;p__Firmicutes_A;c__Clostridia_A;o__Christensenellales;f__Borkfalkiaceae;g__QALS01;s__	blast	96.5	iPHoP-RF;62.70
RGVC436	GB_GCA_002474405.1	d__Bacteria;p__Firmicutes_A;c__Clostridia_A;o__Christensenellales;f__Borkfalkiaceae;g__UBA7597;s__UBA7597 sp002474405	blast	91.9	iPHoP-RF;64.00
RGVC436	GB_GCA_003448195.1	d__Bacteria;p__Firmicutes_A;c__Clostridia_A;o__Christensenellales;f__Borkfalkiaceae;g__UBA7597;s__UBA7597 sp003448195	blast	91.5	iPHoP-RF;68.90
RGVC436	GB_GCA_900540805.1	d__Bacteria;p__Firmicutes_A;c__Clostridia_A;o__Christensenellales;f__Borkfalkiaceae;g__QALS01;s__QALS01 sp003150575	blast	96.8	iPHoP-RF;80.30
RGVC436	GB_GCA_900542935.1	d__Bacteria;p__Firmicutes_A;c__Clostridia_A;o__Christensenellales;f__Borkfalkiaceae;g__UBA7597;s__UBA7597 sp900542935	blast	91.3	iPHoP-RF;51.20
RGVC436	GB_GCA_900552625.1	d__Bacteria;p__Firmicutes_A;c__Clostridia_A;o__Christensenellales;f__Borkfalkiaceae;g__QALS01;s__QALS01 sp900552625	blast	91.7	iPHoP-RF;65.80
RGVC436	GB_GCA_900555925.1	d__Bacteria;p__Firmicutes_A;c__Clostridia_A;o__Christensenellales;f__Borkfalkiaceae;g__QALS01;s__QALS01 sp900555925	blast	95.4	iPHoP-RF;74.30
RGVC436	RS_GCF_900769545.1	d__Bacteria;p__Firmicutes_A;c__Clostridia_A;o__Christensenellales;f__Borkfalkiaceae;g__QALS01;s__QALS01 sp900769545	blast	96.6	iPHoP-RF;71.90
RGVC438	3300010280_45	d__Bacteria;p__Firmicutes_A;c__Clostridia;o__Oscillospirales;f__Oscillospiraceae;g__UBA1777;s__	blast	91.4	iPHoP-RF;70.40
RGVC438	3300027276_44	d__Bacteria;p__Firmicutes_A;c__Clostridia;o__Oscillospirales;f__Oscillospiraceae;g__UBA1777;s__	blast	91.6	iPHoP-RF;60.10
RGVC438	3300029587_26	d__Bacteria;p__Firmicutes_A;c__Clostridia;o__Oscillospirales;f__Oscillospiraceae;g__UBA1777;s__	blast	92.1	None
RGVC438	GB_GCA_002431965.1	d__Bacteria;p__Firmicutes_A;c__Clostridia;o__Oscillospirales;f__Oscillospiraceae;g__UBA1777;s__UBA1777 sp002431965	blast	91.5	iPHoP-RF;77.80
RGVC438	GB_GCA_002450075.1	d__Bacteria;p__Firmicutes_A;c__Clostridia;o__Oscillospirales;f__Oscillospiraceae;g__UBA1777;s__UBA1777 sp002450075	blast	91.6	iPHoP-RF;57.60
RGVC438	GB_GCA_002493305.1	d__Bacteria;p__Firmicutes_A;c__Clostridia;o__Oscillospirales;f__Oscillospiraceae;g__UBA1777;s__UBA1777 sp002493305	blast	91.4	iPHoP-RF;70.40
RGVC438	GB_GCA_003150355.1	d__Bacteria;p__Firmicutes_A;c__Clostridia;o__Oscillospirales;f__Oscillospiraceae;g__UBA1777;s__UBA1777 sp003150355	blast	93.5	iPHoP-RF;61.90
RGVC438	GB_GCA_004560305.1	d__Bacteria;p__Firmicutes_A;c__Clostridia;o__Oscillospirales;f__Oscillospiraceae;g__UBA1777;s__UBA1777 sp004560305	blast	92.1	iPHoP-RF;86.00
RGVC438	GB_GCA_900319465.1	d__Bacteria;p__Firmicutes_A;c__Clostridia;o__Oscillospirales;f__Oscillospiraceae;g__UBA1777;s__UBA1777 sp900319465	blast	90.6	None
RGVC438	GB_GCA_900319695.1	d__Bacteria;p__Firmicutes_A;c__Clostridia;o__Oscillospirales;f__Oscillospiraceae;g__UBA1777;s__UBA1777 sp900319695	blast	91.7	iPHoP-RF;52.80
RGVC438	GB_GCA_900319835.1	d__Bacteria;p__Firmicutes_A;c__Clostridia;o__Oscillospirales;f__Oscillospiraceae;g__UBA1777;s__UBA1777 sp900319835	blast	91.7	iPHoP-RF;75.00
RGVC438	GB_GCA_900319935.1	d__Bacteria;p__Firmicutes_A;c__Clostridia;o__Oscillospirales;f__Oscillospiraceae;g__UBA1777;s__UBA1777 sp900319935	blast	91.6	iPHoP-RF;60.60
RGVC438	GB_GCA_900320465.1	d__Bacteria;p__Firmicutes_A;c__Clostridia;o__Oscillospirales;f__Oscillospiraceae;g__UBA1777;s__UBA1777 sp900320465	blast	90.6	None
RGVC438	GB_GCA_900320595.1	d__Bacteria;p__Firmicutes_A;c__Clostridia;o__Oscillospirales;f__Oscillospiraceae;g__UBA1777;s__UBA1777 sp900320595	blast	90.6	None
RGVC438	GB_GCA_900321275.1	d__Bacteria;p__Firmicutes_A;c__Clostridia;o__Oscillospirales;f__Oscillospiraceae;g__UBA1777;s__UBA1777 sp900321275	blast	91.7	iPHoP-RF;57.10
RGVC438	GB_GCA_900546515.1	d__Bacteria;p__Firmicutes_A;c__Clostridia;o__Oscillospirales;f__Oscillospiraceae;g__UBA1777;s__UBA1777 sp900546515	blast	91.4	iPHoP-RF;61.40
RGVC438	GB_GCA_900547315.1	d__Bacteria;p__Firmicutes_A;c__Clostridia;o__Oscillospirales;f__Oscillospiraceae;g__UBA1777;s__UBA1777 sp900547315	blast	93.6	iPHoP-RF;88.20
RGVC438	GB_GCA_900549545.1	d__Bacteria;p__Firmicutes_A;c__Clostridia;o__Oscillospirales;f__Oscillospiraceae;g__UBA1777;s__UBA1777 sp900549545	blast	91.4	iPHoP-RF;58.20
RGVC438	GB_GCA_900549645.1	d__Bacteria;p__Firmicutes_A;c__Clostridia;o__Oscillospirales;f__Oscillospiraceae;g__UBA1777;s__UBA1777 sp900549645	blast	93.6	iPHoP-RF;87.60
RGVC438	GB_GCA_900549865.1	d__Bacteria;p__Firmicutes_A;c__Clostridia;o__Oscillospirales;f__Oscillospiraceae;g__UBA1777;s__UBA1777 sp900549865	blast	91.5	iPHoP-RF;88.50
RGVC438	GB_GCA_900754515.1	d__Bacteria;p__Firmicutes_A;c__Clostridia;o__Oscillospirales;f__Oscillospiraceae;g__UBA1777;s__UBA1777 sp900754515	blast	90.6	iPHoP-RF;81.40
RGVC439	RS_GCF_900626285.1	d__Bacteria;p__Firmicutes_A;c__Clostridia;o__Oscillospirales;f__Oscillospiraceae;g__Flavonifractor;s__Flavonifractor massiliensis_A	blast	91.1	iPHoP-RF;73.20
RGVC443	RS_GCF_013009555.1	d__Bacteria;p__Bacteroidota;c__Bacteroidia;o__Bacteroidales;f__Bacteroidaceae;g__Phocaeicola;s__Phocaeicola dorei	iPHoP-RF	96.4	blast;90.80
RGVC443	RS_GCF_001314995.1	d__Bacteria;p__Bacteroidota;c__Bacteroidia;o__Bacteroidales;f__Bacteroidaceae;g__Bacteroides;s__Bacteroides ovatus	iPHoP-RF	95.7	blast;81.20
RGVC443	RS_GCF_000381365.1	d__Bacteria;p__Bacteroidota;c__Bacteroidia;o__Bacteroidales;f__Bacteroidaceae;g__Bacteroides;s__Bacteroides salyersiae	iPHoP-RF	95.1	blast;82.40
RGVC443	RS_GCF_000172175.1	d__Bacteria;p__Bacteroidota;c__Bacteroidia;o__Bacteroidales;f__Bacteroidaceae;g__Bacteroides;s__Bacteroides intestinalis	iPHoP-RF	94.7	blast;89.00
RGVC443	RS_GCF_000613385.1	d__Bacteria;p__Bacteroidota;c__Bacteroidia;o__Bacteroidales;f__Bacteroidaceae;g__Bacteroides;s__Bacteroides acidifaciens	iPHoP-RF	94.7	None
RGVC443	RS_GCF_001688725.2	d__Bacteria;p__Bacteroidota;c__Bacteroidia;o__Bacteroidales;f__Bacteroidaceae;g__Bacteroides;s__Bacteroides caecimuris	iPHoP-RF	94.7	None
RGVC443	RS_GCF_012113595.1	d__Bacteria;p__Bacteroidota;c__Bacteroidia;o__Bacteroidales;f__Bacteroidaceae;g__Bacteroides;s__Bacteroides sp012113595	iPHoP-RF	94.7	None
RGVC443	RS_GCF_014334015.1	d__Bacteria;p__Bacteroidota;c__Bacteroidia;o__Bacteroidales;f__Bacteroidaceae;g__Bacteroides;s__Bacteroides sp003463205	iPHoP-RF	94.7	blast;81.20
RGVC443	RS_GCF_903181435.1	d__Bacteria;p__Bacteroidota;c__Bacteroidia;o__Bacteroidales;f__Bacteroidaceae;g__Bacteroides;s__Bacteroides acidifaciens_A	iPHoP-RF	94.7	blast;81.20
RGVC443	GB_GCA_900557355.1	d__Bacteria;p__Bacteroidota;c__Bacteroidia;o__Bacteroidales;f__Bacteroidaceae;g__Bacteroides;s__Bacteroides sp900557355	iPHoP-RF	94.4	None
RGVC443	RS_GCF_000156195.1	d__Bacteria;p__Bacteroidota;c__Bacteroidia;o__Bacteroidales;f__Bacteroidaceae;g__Bacteroides;s__Bacteroides finegoldii	iPHoP-RF	94.4	None
RGVC443	RS_GCF_000315485.1	d__Bacteria;p__Bacteroidota;c__Bacteroidia;o__Bacteroidales;f__Bacteroidaceae;g__Bacteroides;s__Bacteroides oleiciplenus	iPHoP-RF	94.4	blast;89.00
RGVC443	RS_GCF_009193325.2	d__Bacteria;p__Bacteroidota;c__Bacteroidia;o__Bacteroidales;f__Bacteroidaceae;g__Bacteroides;s__Bacteroides sp900066265	iPHoP-RF	94.4	blast;81.20
RGVC443	RS_GCF_900760795.1	d__Bacteria;p__Bacteroidota;c__Bacteroidia;o__Bacteroidales;f__Bacteroidaceae;g__Phocaeicola;s__Phocaeicola sp900760795	iPHoP-RF	94.4	blast;88.40
RGVC443	GB_GCA_000210075.1	d__Bacteria;p__Bacteroidota;c__Bacteroidia;o__Bacteroidales;f__Bacteroidaceae;g__Bacteroides;s__Bacteroides xylanisolvens	iPHoP-RF	94.1	blast;81.20
RGVC443	RS_GCF_000011065.1	d__Bacteria;p__Bacteroidota;c__Bacteroidia;o__Bacteroidales;f__Bacteroidaceae;g__Bacteroides;s__Bacteroides thetaiotaomicron	iPHoP-RF	94.1	blast;81.20
RGVC443	RS_GCF_000012825.1	d__Bacteria;p__Bacteroidota;c__Bacteroidia;o__Bacteroidales;f__Bacteroidaceae;g__Phocaeicola;s__Phocaeicola vulgatus	iPHoP-RF	94.1	blast;89.40 CRISPR;69.80
RGVC443	RS_GCF_003437535.1	d__Bacteria;p__Bacteroidota;c__Bacteroidia;o__Bacteroidales;f__Bacteroidaceae;g__Phocaeicola;s__Phocaeicola plebeius_A	iPHoP-RF	94.1	blast;82.80
RGVC443	RS_GCF_902362375.1	d__Bacteria;p__Bacteroidota;c__Bacteroidia;o__Bacteroidales;f__Bacteroidaceae;g__Bacteroides;s__Bacteroides sp902362375	iPHoP-RF	94.1	None
RGVC443	GB_GCA_900552405.1	d__Bacteria;p__Bacteroidota;c__Bacteroidia;o__Bacteroidales;f__Bacteroidaceae;g__Bacteroides;s__Bacteroides sp900552405	iPHoP-RF	93.7	None
RGVC443	GB_GCA_900761785.1	d__Bacteria;p__Bacteroidota;c__Bacteroidia;o__Bacteroidales;f__Bacteroidaceae;g__Bacteroides;s__Bacteroides sp900761785	iPHoP-RF	93.7	None
RGVC443	RS_GCF_000513195.1	d__Bacteria;p__Bacteroidota;c__Bacteroidia;o__Bacteroidales;f__Bacteroidaceae;g__Bacteroides;s__Bacteroides timonensis	iPHoP-RF	93.7	None
RGVC443	GB_GCA_014385165.1	d__Bacteria;p__Bacteroidota;c__Bacteroidia;o__Bacteroidales;f__Bacteroidaceae;g__Bacteroides;s__Bacteroides sp014385165	iPHoP-RF	93.4	None
RGVC443	RS_GCF_000382445.1	d__Bacteria;p__Bacteroidota;c__Bacteroidia;o__Bacteroidales;f__Bacteroidaceae;g__Phocaeicola;s__Phocaeicola massiliensis	iPHoP-RF	93.4	blast;91.90
RGVC443	GB_GCA_902388365.1	d__Bacteria;p__Bacteroidota;c__Bacteroidia;o__Bacteroidales;f__Bacteroidaceae;g__Phocaeicola;s__Phocaeicola sp902388365	iPHoP-RF	93.1	blast;71.70
RGVC443	RS_GCF_000614185.1	d__Bacteria;p__Bacteroidota;c__Bacteroidia;o__Bacteroidales;f__Bacteroidaceae;g__Phocaeicola;s__Phocaeicola sartorii	iPHoP-RF	93.1	blast;88.70
RGVC443	RS_GCF_900130125.1	d__Bacteria;p__Bacteroidota;c__Bacteroidia;o__Bacteroidales;f__Bacteroidaceae;g__Bacteroides;s__Bacteroides congonensis	iPHoP-RF	92.4	blast;81.20
RGVC443	GB_GCA_900554435.1	d__Bacteria;p__Bacteroidota;c__Bacteroidia;o__Bacteroidales;f__Bacteroidaceae;g__Phocaeicola;s__Phocaeicola sp900554435	iPHoP-RF	92.1	None
RGVC443	RS_GCF_000614165.1	d__Bacteria;p__Bacteroidota;c__Bacteroidia;o__Bacteroidales;f__Bacteroidaceae;g__Bacteroides;s__Bacteroides stercorirosoris	iPHoP-RF	91.8	None
RGVC443	RS_GCF_003865075.1	d__Bacteria;p__Bacteroidota;c__Bacteroidia;o__Bacteroidales;f__Bacteroidaceae;g__Bacteroides;s__Bacteroides sp003865075	iPHoP-RF	91.4	blast;81.20
RGVC443	RS_GCF_003464595.1	d__Bacteria;p__Bacteroidota;c__Bacteroidia;o__Bacteroidales;f__Bacteroidaceae;g__Bacteroides;s__Bacteroides intestinalis_A	iPHoP-RF	91.1	None
RGVC443	GB_GCA_900765805.1	d__Bacteria;p__Bacteroidota;c__Bacteroidia;o__Bacteroidales;f__Bacteroidaceae;g__Bacteroides;s__Bacteroides sp900765805	iPHoP-RF	90.5	None
RGVC443	RS_GCF_000158035.1	d__Bacteria;p__Bacteroidota;c__Bacteroidia;o__Bacteroidales;f__Bacteroidaceae;g__Bacteroides;s__Bacteroides cellulosilyticus	iPHoP-RF	90.5	None
RGVC444	3300022660_123	d__Bacteria;p__Firmicutes_A;c__Clostridia;o__Oscillospirales;f__Ruminococcaceae;g__;s__	blast	92.6	iPHoP-RF;76.10
RGVC444	GB_GCA_900541495.1	d__Bacteria;p__Firmicutes_A;c__Clostridia;o__Oscillospirales;f__Ruminococcaceae;g__UMGS363;s__UMGS363 sp900541495	blast	91.7	iPHoP-RF;74.60
RGVC444	GB_GCA_900543105.1	d__Bacteria;p__Firmicutes_A;c__Clostridia;o__Oscillospirales;f__Ruminococcaceae;g__UMGS363;s__UMGS363 sp900543105	blast	91.7	iPHoP-RF;78.30
RGVC444	GB_GCA_900550695.1	d__Bacteria;p__Firmicutes_A;c__Clostridia;o__Oscillospirales;f__Ruminococcaceae;g__UMGS363;s__UMGS363 sp900550695	blast	91.7	iPHoP-RF;78.30
RGVC444	RS_GCF_900768245.1	d__Bacteria;p__Firmicutes_A;c__Clostridia;o__Oscillospirales;f__Ruminococcaceae;g__UMGS363;s__UMGS363 sp900768245	blast	91.8	None
RGVC445	3300018475_141	d__Bacteria;p__Firmicutes_A;c__Clostridia;o__Oscillospirales;f__Ruminococcaceae;g__Ruminococcus;s__	blast	90.2	iPHoP-RF;65.80
RGVC445	3300021319_17	d__Bacteria;p__Firmicutes_A;c__Clostridia;o__Oscillospirales;f__Ruminococcaceae;g__Ruminococcus;s__	blast	91	iPHoP-RF;74.80
RGVC445	3300021399_33	d__Bacteria;p__Firmicutes_A;c__Clostridia;o__Oscillospirales;f__Ruminococcaceae;g__Ruminococcus;s__	blast	90.4	iPHoP-RF;51.20
RGVC445	GB_GCA_000174895.1	d__Bacteria;p__Firmicutes_A;c__Clostridia;o__Oscillospirales;f__Ruminococcaceae;g__Ruminococcus;s__Ruminococcus flavefaciens_A	blast	90.3	iPHoP-RF;61.90
RGVC445	GB_GCA_001604035.1	d__Bacteria;p__Firmicutes_A;c__Clostridia;o__Oscillospirales;f__Ruminococcaceae;g__Ruminococcus;s__Ruminococcus sp001604035	blast	91.2	iPHoP-RF;74.30
RGVC445	GB_GCA_002348905.1	d__Bacteria;p__Firmicutes_A;c__Clostridia;o__Oscillospirales;f__Ruminococcaceae;g__Ruminococcus;s__Ruminococcus flavefaciens_O	blast	90.4	None
RGVC445	GB_GCA_002350065.1	d__Bacteria;p__Firmicutes_A;c__Clostridia;o__Oscillospirales;f__Ruminococcaceae;g__Ruminococcus;s__Ruminococcus flavefaciens_N	blast	90.7	iPHoP-RF;50.20
RGVC445	GB_GCA_002362135.1	d__Bacteria;p__Firmicutes_A;c__Clostridia;o__Oscillospirales;f__Ruminococcaceae;g__Ruminococcus;s__Ruminococcus sp002362135	blast	90.4	None
RGVC445	GB_GCA_002362175.1	d__Bacteria;p__Firmicutes_A;c__Clostridia;o__Oscillospirales;f__Ruminococcaceae;g__Ruminococcus;s__Ruminococcus sp002362175	blast	90.3	None
RGVC445	GB_GCA_002371825.1	d__Bacteria;p__Firmicutes_A;c__Clostridia;o__Oscillospirales;f__Ruminococcaceae;g__Ruminococcus;s__Ruminococcus flavefaciens_L	blast	91.2	iPHoP-RF;73.00
RGVC445	GB_GCA_002373775.1	d__Bacteria;p__Firmicutes_A;c__Clostridia;o__Oscillospirales;f__Ruminococcaceae;g__Ruminococcus;s__Ruminococcus flavefaciens_M	blast	91.2	iPHoP-RF;73.50
RGVC445	GB_GCA_002389995.1	d__Bacteria;p__Firmicutes_A;c__Clostridia;o__Oscillospirales;f__Ruminococcaceae;g__Ruminococcus;s__Ruminococcus sp002389995	blast	90.4	None
RGVC445	GB_GCA_002438605.1	d__Bacteria;p__Firmicutes_A;c__Clostridia;o__Oscillospirales;f__Ruminococcaceae;g__Ruminococcus;s__Ruminococcus sp002438605	blast	91.7	None
RGVC445	GB_GCA_004554385.1	d__Bacteria;p__Firmicutes_A;c__Clostridia;o__Oscillospirales;f__Ruminococcaceae;g__Ruminococcus;s__Ruminococcus flavefaciens_T	blast	91.2	iPHoP-RF;60.90
RGVC445	GB_GCA_009177225.1	d__Bacteria;p__Firmicutes_A;c__Clostridia;o__Oscillospirales;f__Ruminococcaceae;g__Ruminococcus;s__Ruminococcus sp009177225	blast	90.3	None
RGVC445	GB_GCA_012718885.1	d__Bacteria;p__Firmicutes_A;c__Clostridia;o__Oscillospirales;f__Ruminococcaceae;g__Ruminococcus;s__Ruminococcus sp012718885	blast	91.2	iPHoP-RF;70.90
RGVC445	GB_GCA_900315755.1	d__Bacteria;p__Firmicutes_A;c__Clostridia;o__Oscillospirales;f__Ruminococcaceae;g__Ruminococcus;s__Ruminococcus sp900315755	blast	91	iPHoP-RF;72.60
RGVC445	GB_GCA_900315975.1	d__Bacteria;p__Firmicutes_A;c__Clostridia;o__Oscillospirales;f__Ruminococcaceae;g__Ruminococcus;s__Ruminococcus sp900315975	blast	90.7	iPHoP-RF;52.80
RGVC445	GB_GCA_900318825.1	d__Bacteria;p__Firmicutes_A;c__Clostridia;o__Oscillospirales;f__Ruminococcaceae;g__Ruminococcus;s__Ruminococcus sp900318825	blast	91	iPHoP-RF;70.40
RGVC445	GB_GCA_900319195.1	d__Bacteria;p__Firmicutes_A;c__Clostridia;o__Oscillospirales;f__Ruminococcaceae;g__Ruminococcus;s__Ruminococcus sp900319195	blast	90.4	iPHoP-RF;52.00
RGVC445	GB_GCA_900540005.1	d__Bacteria;p__Firmicutes_A;c__Clostridia;o__Oscillospirales;f__Ruminococcaceae;g__Ruminococcus;s__Ruminococcus sp900540005	blast	90.6	iPHoP-RF;59.00
RGVC445	GB_GCA_900545125.1	d__Bacteria;p__Firmicutes_A;c__Clostridia;o__Oscillospirales;f__Ruminococcaceae;g__Ruminococcus;s__Ruminococcus sp900545125	blast	90.5	None
RGVC445	GB_GCA_900752785.1	d__Bacteria;p__Firmicutes_A;c__Clostridia;o__Oscillospirales;f__Ruminococcaceae;g__Ruminococcus;s__Ruminococcus sp900752785	blast	91.7	None
RGVC445	GB_GCA_900761275.1	d__Bacteria;p__Firmicutes_A;c__Clostridia;o__Oscillospirales;f__Ruminococcaceae;g__Ruminococcus;s__Ruminococcus sp900761275	blast	91.2	None
RGVC445	RS_GCF_000526795.1	d__Bacteria;p__Firmicutes_A;c__Clostridia;o__Oscillospirales;f__Ruminococcaceae;g__Ruminococcus;s__Ruminococcus flavefaciens_D	blast	92.2	iPHoP-RF;60.10
RGVC445	RS_GCF_000621845.1	d__Bacteria;p__Firmicutes_A;c__Clostridia;o__Oscillospirales;f__Ruminococcaceae;g__Ruminococcus;s__Ruminococcus flavefaciens_E	blast	91.4	iPHoP-RF;67.30
RGVC445	RS_GCF_900109435.1	d__Bacteria;p__Firmicutes_A;c__Clostridia;o__Oscillospirales;f__Ruminococcaceae;g__Ruminococcus;s__Ruminococcus flavefaciens_G	blast	90.8	iPHoP-RF;54.40
RGVC445	RS_GCF_900119075.1	d__Bacteria;p__Firmicutes_A;c__Clostridia;o__Oscillospirales;f__Ruminococcaceae;g__Ruminococcus;s__Ruminococcus flavefaciens_Q	blast	92	iPHoP-RF;68.90
RGVC445	RS_GCF_900119535.1	d__Bacteria;p__Firmicutes_A;c__Clostridia;o__Oscillospirales;f__Ruminococcaceae;g__Ruminococcus;s__Ruminococcus flavefaciens_H	blast	90.7	None
RGVC445	RS_GCF_900143025.1	d__Bacteria;p__Firmicutes_A;c__Clostridia;o__Oscillospirales;f__Ruminococcaceae;g__Ruminococcus;s__Ruminococcus flavefaciens_I	blast	90.1	iPHoP-RF;64.30
RGVC445	RS_GCF_902762855.1	d__Bacteria;p__Firmicutes_A;c__Clostridia;o__Oscillospirales;f__Ruminococcaceae;g__Ruminococcus;s__Ruminococcus flavefaciens_V	blast	91.2	iPHoP-RF;66.30
RGVC445	RS_GCF_902777125.1	d__Bacteria;p__Firmicutes_A;c__Clostridia;o__Oscillospirales;f__Ruminococcaceae;g__Ruminococcus;s__Ruminococcus sp900321885	blast	91	iPHoP-RF;72.80
RGVC445	RS_GCF_902792495.1	d__Bacteria;p__Firmicutes_A;c__Clostridia;o__Oscillospirales;f__Ruminococcaceae;g__Ruminococcus;s__Ruminococcus flavefaciens_Z	blast	90.1	iPHoP-RF;61.10
RGVC445	RS_GCF_902796705.1	d__Bacteria;p__Firmicutes_A;c__Clostridia;o__Oscillospirales;f__Ruminococcaceae;g__Ruminococcus;s__Ruminococcus flavefaciens_W	blast	90.3	iPHoP-RF;62.20
RGVC447	3300010259_5	d__Bacteria;p__Firmicutes_A;c__Clostridia;o__Oscillospirales;f__Oscillospiraceae;g__CAG-110;s__	blast	91.4	None
RGVC447	GB_GCA_000434635.1	d__Bacteria;p__Firmicutes_A;c__Clostridia;o__Oscillospirales;f__Oscillospiraceae;g__CAG-110;s__CAG-110 sp000434635	blast	93.8	iPHoP-RF;59.50
RGVC447	GB_GCA_002362145.1	d__Bacteria;p__Firmicutes_A;c__Clostridia;o__Oscillospirales;f__Oscillospiraceae;g__CAG-110;s__CAG-110 sp002362145	blast	92	iPHoP-RF;67.00
RGVC447	GB_GCA_002437585.1	d__Bacteria;p__Firmicutes_A;c__Clostridia;o__Oscillospirales;f__Oscillospiraceae;g__CAG-110;s__CAG-110 sp002437585	blast	92	iPHoP-RF;59.50
RGVC447	GB_GCA_004555705.1	d__Bacteria;p__Firmicutes_A;c__Clostridia;o__Oscillospirales;f__Oscillospiraceae;g__CAG-110;s__CAG-110 sp004555705	blast	92	None
RGVC447	GB_GCA_900540635.1	d__Bacteria;p__Firmicutes_A;c__Clostridia;o__Oscillospirales;f__Oscillospiraceae;g__CAG-110;s__CAG-110 sp900540635	blast	91.4	None
RGVC447	GB_GCA_900544945.1	d__Bacteria;p__Firmicutes_A;c__Clostridia;o__Oscillospirales;f__Oscillospiraceae;g__CAG-110;s__CAG-110 sp900544945	blast	92	iPHoP-RF;56.50
RGVC447	GB_GCA_900546075.1	d__Bacteria;p__Firmicutes_A;c__Clostridia;o__Oscillospirales;f__Oscillospiraceae;g__CAG-110;s__CAG-110 sp900546075	blast	90	iPHoP-RF;56.20
RGVC447	GB_GCA_900547405.1	d__Bacteria;p__Firmicutes_A;c__Clostridia;o__Oscillospirales;f__Oscillospiraceae;g__CAG-110;s__CAG-110 sp900547405	blast	91.4	None
RGVC447	GB_GCA_900549495.1	d__Bacteria;p__Firmicutes_A;c__Clostridia;o__Oscillospirales;f__Oscillospiraceae;g__CAG-110;s__CAG-110 sp900549495	blast	91.4	None
RGVC447	GB_GCA_900549705.1	d__Bacteria;p__Firmicutes_A;c__Clostridia;o__Oscillospirales;f__Oscillospiraceae;g__CAG-110;s__CAG-110 sp900549705	blast	91.6	iPHoP-RF;60.60
RGVC447	GB_GCA_900553805.1	d__Bacteria;p__Firmicutes_A;c__Clostridia;o__Oscillospirales;f__Oscillospiraceae;g__CAG-110;s__CAG-110 sp900553805	blast	91.4	None
RGVC447	GB_GCA_900556935.1	d__Bacteria;p__Firmicutes_A;c__Clostridia;o__Oscillospirales;f__Oscillospiraceae;g__CAG-110;s__CAG-110 sp900556935	blast	91.4	None
RGVC447	GB_GCA_900752285.1	d__Bacteria;p__Firmicutes_A;c__Clostridia;o__Oscillospirales;f__Oscillospiraceae;g__CAG-110;s__CAG-110 sp900752285	blast	91.4	None
RGVC447	GB_GCA_900762245.1	d__Bacteria;p__Firmicutes_A;c__Clostridia;o__Oscillospirales;f__Oscillospiraceae;g__CAG-110;s__CAG-110 sp900762245	blast	92	None
RGVC447	GB_GCA_900763965.1	d__Bacteria;p__Firmicutes_A;c__Clostridia;o__Oscillospirales;f__Oscillospiraceae;g__CAG-110;s__CAG-110 sp900763965	blast	92	None
RGVC447	GB_GCA_900769835.1	d__Bacteria;p__Firmicutes_A;c__Clostridia;o__Oscillospirales;f__Oscillospiraceae;g__CAG-110;s__CAG-110 sp900769835	blast	91.9	iPHoP-RF;55.70
RGVC447	GB_GCA_900769845.1	d__Bacteria;p__Firmicutes_A;c__Clostridia;o__Oscillospirales;f__Oscillospiraceae;g__CAG-110;s__CAG-110 sp900769845	blast	91.4	None
RGVC447	GB_GCA_900770015.1	d__Bacteria;p__Firmicutes_A;c__Clostridia;o__Oscillospirales;f__Oscillospiraceae;g__CAG-110;s__CAG-110 sp900770015	blast	91.4	None
RGVC449	GB_GCA_900545585.1	d__Bacteria;p__Firmicutes_A;c__Clostridia;o__Oscillospirales;f__Oscillospiraceae;g__CAG-83;s__CAG-83 sp900545585	blast	90.9	None
RGVC449	GB_GCA_900547745.1	d__Bacteria;p__Firmicutes_A;c__Clostridia;o__Oscillospirales;f__Oscillospiraceae;g__CAG-83;s__CAG-83 sp900547745	blast	90.8	None
RGVC449	GB_GCA_900551995.1	d__Bacteria;p__Firmicutes_A;c__Clostridia;o__Oscillospirales;f__Oscillospiraceae;g__CAG-83;s__CAG-83 sp900551995	blast	91.1	None
RGVC450	GB_GCA_014385025.1	d__Bacteria;p__Firmicutes_A;c__Clostridia;o__Oscillospirales;f__Ruminococcaceae;g__D5;s__D5 sp014385025	blast	91.7	iPHoP-RF;84.80 CRISPR;71.80
RGVC450	RS_GCF_014287675.1	d__Bacteria;p__Firmicutes_A;c__Clostridia;o__Oscillospirales;f__Oscillospiraceae;g__Pseudoflavonifractor;s__Pseudoflavonifractor sp014287675	blast	90.8	None
RGVC450	RS_GCF_014287895.1	d__Bacteria;p__Firmicutes_A;c__Clostridia;o__Oscillospirales;f__Oscillospiraceae;g__Flavonifractor;s__Flavonifractor sp900549795	blast	90.9	None
RGVC450	RS_GCF_900113995.1	d__Bacteria;p__Firmicutes_A;c__Clostridia;o__Oscillospirales;f__Ruminococcaceae;g__D5;s__D5 sp900113995	blast	91.7	CRISPR;84.70 iPHoP-RF;83.30
RGVC450	RS_GCF_900199495.1	d__Bacteria;p__Firmicutes_A;c__Clostridia;o__Oscillospirales;f__Oscillospiraceae;g__An92;s__An92 sp900199495	blast	90.5	None
RGVC451	3300022660_136	d__Bacteria;p__Firmicutes_A;c__Clostridia;o__Oscillospirales;f__;g__;s__	blast	91.2	None
RGVC453	RS_GCF_001244995.1	d__Bacteria;p__Firmicutes_A;c__Clostridia;o__Oscillospirales;f__Oscillospiraceae;g__Intestinimonas;s__Intestinimonas massiliensis	blast	92.9	None
RGVC453	RS_GCF_003573975.1	d__Bacteria;p__Firmicutes_A;c__Clostridia;o__Oscillospirales;f__Oscillospiraceae;g__Lawsonibacter;s__Lawsonibacter sp900066825	blast	90.2	iPHoP-RF;61.40
RGVC454	GB_GCA_003018335.1	d__Bacteria;p__Proteobacteria;c__Gammaproteobacteria;o__Enterobacterales;f__Enterobacteriaceae;g__Escherichia;s__Escherichia coli_C	iPHoP-RF	96.7	None
RGVC454	RS_GCF_000026225.1	d__Bacteria;p__Proteobacteria;c__Gammaproteobacteria;o__Enterobacterales;f__Enterobacteriaceae;g__Escherichia;s__Escherichia fergusonii	blast	96.9	iPHoP-RF;94.10
RGVC454	RS_GCF_000026325.1	d__Bacteria;p__Proteobacteria;c__Gammaproteobacteria;o__Enterobacterales;f__Enterobacteriaceae;g__Escherichia;s__Escherichia coli_D	blast	96.9	iPHoP-RF;96.10
RGVC454	RS_GCF_000208585.1	d__Bacteria;p__Proteobacteria;c__Gammaproteobacteria;o__Enterobacterales;f__Enterobacteriaceae;g__Escherichia;s__Escherichia sp000208585	iPHoP-RF	97.1	None
RGVC454	RS_GCF_000759775.1	d__Bacteria;p__Proteobacteria;c__Gammaproteobacteria;o__Enterobacterales;f__Enterobacteriaceae;g__Escherichia;s__Escherichia albertii	iPHoP-RF	97.1	blast;96.90
RGVC454	RS_GCF_001660175.1	d__Bacteria;p__Proteobacteria;c__Gammaproteobacteria;o__Enterobacterales;f__Enterobacteriaceae;g__Escherichia;s__Escherichia sp001660175	iPHoP-RF	96.1	None
RGVC454	RS_GCF_002900365.1	d__Bacteria;p__Proteobacteria;c__Gammaproteobacteria;o__Enterobacterales;f__Enterobacteriaceae;g__Escherichia;s__Escherichia marmotae	blast	96.9	iPHoP-RF;96.40
RGVC454	RS_GCF_002949675.1	d__Bacteria;p__Proteobacteria;c__Gammaproteobacteria;o__Enterobacterales;f__Enterobacteriaceae;g__Escherichia;s__Escherichia dysenteriae	iPHoP-RF	97.1	blast;96.90
RGVC454	RS_GCF_002950215.1	d__Bacteria;p__Proteobacteria;c__Gammaproteobacteria;o__Enterobacterales;f__Enterobacteriaceae;g__Escherichia;s__Escherichia flexneri	blast	96.9	iPHoP-RF;96.70
RGVC454	RS_GCF_002965065.1	d__Bacteria;p__Proteobacteria;c__Gammaproteobacteria;o__Enterobacterales;f__Enterobacteriaceae;g__Escherichia;s__Escherichia sp002965065	iPHoP-RF	96.7	None
RGVC454	RS_GCF_003697165.2	d__Bacteria;p__Proteobacteria;c__Gammaproteobacteria;o__Enterobacterales;f__Enterobacteriaceae;g__Escherichia;s__Escherichia coli	blast	96.9	iPHoP-RF;96.40
RGVC454	RS_GCF_004211955.1	d__Bacteria;p__Proteobacteria;c__Gammaproteobacteria;o__Enterobacterales;f__Enterobacteriaceae;g__Escherichia;s__Escherichia sp004211955	iPHoP-RF	96.1	None
RGVC454	RS_GCF_005843885.1	d__Bacteria;p__Proteobacteria;c__Gammaproteobacteria;o__Enterobacterales;f__Enterobacteriaceae;g__Escherichia;s__Escherichia sp005843885	iPHoP-RF	97.1	CRISPR;74.90
RGVC454	RS_GCF_011881725.1	d__Bacteria;p__Proteobacteria;c__Gammaproteobacteria;o__Enterobacterales;f__Enterobacteriaceae;g__Escherichia;s__Escherichia coli_E	iPHoP-RF	96.7	None
RGVC455	3300010259_5	d__Bacteria;p__Firmicutes_A;c__Clostridia;o__Oscillospirales;f__Oscillospiraceae;g__CAG-110;s__	blast	96.7	None
RGVC455	3300022660_140	d__Bacteria;p__Firmicutes_A;c__Clostridia;o__Oscillospirales;f__Oscillospiraceae;g__CAG-110;s__	blast	96.9	None
RGVC455	GB_GCA_000434635.1	d__Bacteria;p__Firmicutes_A;c__Clostridia;o__Oscillospirales;f__Oscillospiraceae;g__CAG-110;s__CAG-110 sp000434635	blast	96.9	iPHoP-RF;60.90
RGVC455	GB_GCA_002362145.1	d__Bacteria;p__Firmicutes_A;c__Clostridia;o__Oscillospirales;f__Oscillospiraceae;g__CAG-110;s__CAG-110 sp002362145	blast	96.9	None
RGVC455	GB_GCA_002362625.1	d__Bacteria;p__Firmicutes_A;c__Clostridia;o__Oscillospirales;f__Oscillospiraceae;g__CAG-110;s__CAG-110 sp002362625	blast	96.9	None
RGVC455	GB_GCA_002436765.1	d__Bacteria;p__Firmicutes_A;c__Clostridia;o__Oscillospirales;f__Oscillospiraceae;g__CAG-110;s__CAG-110 sp002436765	blast	96.9	None
RGVC455	GB_GCA_002437585.1	d__Bacteria;p__Firmicutes_A;c__Clostridia;o__Oscillospirales;f__Oscillospiraceae;g__CAG-110;s__CAG-110 sp002437585	blast	96.9	iPHoP-RF;55.20
RGVC455	GB_GCA_002493965.1	d__Bacteria;p__Firmicutes_A;c__Clostridia;o__Oscillospirales;f__Oscillospiraceae;g__CAG-110;s__CAG-110 sp002493965	blast	96.9	None
RGVC455	GB_GCA_004562395.1	d__Bacteria;p__Firmicutes_A;c__Clostridia;o__Oscillospirales;f__Oscillospiraceae;g__CAG-110;s__CAG-110 sp004562395	blast	96.7	None
RGVC455	GB_GCA_900540635.1	d__Bacteria;p__Firmicutes_A;c__Clostridia;o__Oscillospirales;f__Oscillospiraceae;g__CAG-110;s__CAG-110 sp900540635	blast	96.6	None
RGVC455	GB_GCA_900544405.1	d__Bacteria;p__Firmicutes_A;c__Clostridia;o__Oscillospirales;f__Oscillospiraceae;g__CAG-110;s__CAG-110 sp900544405	blast	96.7	iPHoP-RF;50.90
RGVC455	GB_GCA_900546075.1	d__Bacteria;p__Firmicutes_A;c__Clostridia;o__Oscillospirales;f__Oscillospiraceae;g__CAG-110;s__CAG-110 sp900546075	blast	96.9	None
RGVC455	GB_GCA_900547405.1	d__Bacteria;p__Firmicutes_A;c__Clostridia;o__Oscillospirales;f__Oscillospiraceae;g__CAG-110;s__CAG-110 sp900547405	blast	96.6	None
RGVC455	GB_GCA_900549495.1	d__Bacteria;p__Firmicutes_A;c__Clostridia;o__Oscillospirales;f__Oscillospiraceae;g__CAG-110;s__CAG-110 sp900549495	blast	96.9	None
RGVC455	GB_GCA_900549705.1	d__Bacteria;p__Firmicutes_A;c__Clostridia;o__Oscillospirales;f__Oscillospiraceae;g__CAG-110;s__CAG-110 sp900549705	blast	96.9	None
RGVC455	GB_GCA_900553805.1	d__Bacteria;p__Firmicutes_A;c__Clostridia;o__Oscillospirales;f__Oscillospiraceae;g__CAG-110;s__CAG-110 sp900553805	blast	96.7	None
RGVC455	GB_GCA_900554625.1	d__Bacteria;p__Firmicutes_A;c__Clostridia;o__Oscillospirales;f__Oscillospiraceae;g__CAG-110;s__CAG-110 sp900554625	blast	96.9	None
RGVC455	GB_GCA_900556935.1	d__Bacteria;p__Firmicutes_A;c__Clostridia;o__Oscillospirales;f__Oscillospiraceae;g__CAG-110;s__CAG-110 sp900556935	blast	96.8	None
RGVC455	GB_GCA_900752285.1	d__Bacteria;p__Firmicutes_A;c__Clostridia;o__Oscillospirales;f__Oscillospiraceae;g__CAG-110;s__CAG-110 sp900752285	blast	96.8	None
RGVC455	GB_GCA_900762245.1	d__Bacteria;p__Firmicutes_A;c__Clostridia;o__Oscillospirales;f__Oscillospiraceae;g__CAG-110;s__CAG-110 sp900762245	blast	96.9	None
RGVC455	GB_GCA_900763965.1	d__Bacteria;p__Firmicutes_A;c__Clostridia;o__Oscillospirales;f__Oscillospiraceae;g__CAG-110;s__CAG-110 sp900763965	blast	96.9	None
RGVC455	GB_GCA_900769845.1	d__Bacteria;p__Firmicutes_A;c__Clostridia;o__Oscillospirales;f__Oscillospiraceae;g__CAG-110;s__CAG-110 sp900769845	blast	96.9	None
RGVC455	RS_GCF_900757485.1	d__Bacteria;p__Firmicutes_A;c__Clostridia;o__Oscillospirales;f__Ruminococcaceae;g__HGM13222;s__HGM13222 sp900757485	blast	90.7	None
RGVC456	RS_GCF_900104565.1	d__Bacteria;p__Firmicutes_A;c__Clostridia;o__Oscillospirales;f__Ruminococcaceae;g__Marseille-P2935;s__Marseille-P2935 sp900104565	blast	91.8	None
RGVC457	RS_GCF_005121165.1	d__Bacteria;p__Firmicutes_A;c__Clostridia;o__Oscillospirales;f__Oscillospiraceae;g__Dysosmobacter;s__Dysosmobacter welbionis	blast	91.7	None
RGVC457	RS_GCF_900115635.1	d__Bacteria;p__Firmicutes_A;c__Clostridia;o__Oscillospirales;f__Oscillospiraceae;g__Dysosmobacter;s__Dysosmobacter sp900115635	blast	93.5	iPHoP-RF;57.30
RGVC458	GB_GCA_902790525.1	d__Bacteria;p__Firmicutes_A;c__Clostridia_A;o__Christensenellales;f__CAG-74;g__UBA2862;s__UBA2862 sp902790525	blast	93.9	iPHoP-RF;78.50
RGVC459	GB_GCA_000210075.1	d__Bacteria;p__Bacteroidota;c__Bacteroidia;o__Bacteroidales;f__Bacteroidaceae;g__Bacteroides;s__Bacteroides xylanisolvens	iPHoP-RF	96.7	None
RGVC459	GB_GCA_900547205.1	d__Bacteria;p__Bacteroidota;c__Bacteroidia;o__Bacteroidales;f__Bacteroidaceae;g__Bacteroides;s__Bacteroides sp900547205	iPHoP-RF	95.1	None
RGVC459	GB_GCA_900556625.1	d__Bacteria;p__Bacteroidota;c__Bacteroidia;o__Bacteroidales;f__Bacteroidaceae;g__Bacteroides;s__Bacteroides sp900556625	iPHoP-RF	97.1	None
RGVC459	GB_GCA_900761785.1	d__Bacteria;p__Bacteroidota;c__Bacteroidia;o__Bacteroidales;f__Bacteroidaceae;g__Bacteroides;s__Bacteroides sp900761785	iPHoP-RF	97.1	None
RGVC459	GB_GCA_900765785.1	d__Bacteria;p__Bacteroidota;c__Bacteroidia;o__Bacteroidales;f__Bacteroidaceae;g__Bacteroides;s__Bacteroides sp900765785	iPHoP-RF	96.4	None
RGVC459	GB_GCA_900766005.1	d__Bacteria;p__Bacteroidota;c__Bacteroidia;o__Bacteroidales;f__Bacteroidaceae;g__Bacteroides;s__Bacteroides sp900766005	iPHoP-RF	91.8	None
RGVC459	RS_GCF_000156195.1	d__Bacteria;p__Bacteroidota;c__Bacteroidia;o__Bacteroidales;f__Bacteroidaceae;g__Bacteroides;s__Bacteroides finegoldii	iPHoP-RF	96.1	None
RGVC459	RS_GCF_000172175.1	d__Bacteria;p__Bacteroidota;c__Bacteroidia;o__Bacteroidales;f__Bacteroidaceae;g__Bacteroides;s__Bacteroides intestinalis	iPHoP-RF	92.8	None
RGVC459	RS_GCF_000513195.1	d__Bacteria;p__Bacteroidota;c__Bacteroidia;o__Bacteroidales;f__Bacteroidaceae;g__Bacteroides;s__Bacteroides timonensis	iPHoP-RF	95.1	None
RGVC459	RS_GCF_000613385.1	d__Bacteria;p__Bacteroidota;c__Bacteroidia;o__Bacteroidales;f__Bacteroidaceae;g__Bacteroides;s__Bacteroides acidifaciens	iPHoP-RF	97.1	None
RGVC459	RS_GCF_001314995.1	d__Bacteria;p__Bacteroidota;c__Bacteroidia;o__Bacteroidales;f__Bacteroidaceae;g__Bacteroides;s__Bacteroides ovatus	iPHoP-RF	96.1	None
RGVC459	RS_GCF_001688725.2	d__Bacteria;p__Bacteroidota;c__Bacteroidia;o__Bacteroidales;f__Bacteroidaceae;g__Bacteroides;s__Bacteroides caecimuris	iPHoP-RF	95.1	None
RGVC459	RS_GCF_002222615.2	d__Bacteria;p__Bacteroidota;c__Bacteroidia;o__Bacteroidales;f__Bacteroidaceae;g__Bacteroides;s__Bacteroides caccae	iPHoP-RF	96.7	None
RGVC459	RS_GCF_009193325.2	d__Bacteria;p__Bacteroidota;c__Bacteroidia;o__Bacteroidales;f__Bacteroidaceae;g__Bacteroides;s__Bacteroides sp900066265	iPHoP-RF	96.7	None
RGVC459	RS_GCF_012113595.1	d__Bacteria;p__Bacteroidota;c__Bacteroidia;o__Bacteroidales;f__Bacteroidaceae;g__Bacteroides;s__Bacteroides sp012113595	iPHoP-RF	96.1	None
RGVC459	RS_GCF_014334015.1	d__Bacteria;p__Bacteroidota;c__Bacteroidia;o__Bacteroidales;f__Bacteroidaceae;g__Bacteroides;s__Bacteroides sp003463205	iPHoP-RF	96.4	None
RGVC459	RS_GCF_900106755.1	d__Bacteria;p__Bacteroidota;c__Bacteroidia;o__Bacteroidales;f__Bacteroidaceae;g__Bacteroides;s__Bacteroides faecis	iPHoP-RF	96.7	None
RGVC459	RS_GCF_900130125.1	d__Bacteria;p__Bacteroidota;c__Bacteroidia;o__Bacteroidales;f__Bacteroidaceae;g__Bacteroides;s__Bacteroides congonensis	iPHoP-RF	97.1	None
RGVC459	RS_GCF_902362375.1	d__Bacteria;p__Bacteroidota;c__Bacteroidia;o__Bacteroidales;f__Bacteroidaceae;g__Bacteroides;s__Bacteroides sp902362375	iPHoP-RF	96.1	None
RGVC459	RS_GCF_902364365.1	d__Bacteria;p__Bacteroidota;c__Bacteroidia;o__Bacteroidales;f__Bacteroidaceae;g__Bacteroides;s__Bacteroides sp900556215	iPHoP-RF	93.7	None
RGVC460	RS_GCF_001517625.2	d__Bacteria;p__Firmicutes_A;c__Clostridia;o__Lachnospirales;f__Lachnospiraceae;g__Enterocloster;s__Enterocloster sp001517625	blast	93.8	None
RGVC463	RS_GCF_002998355.1	d__Bacteria;p__Verrucomicrobiota;c__Lentisphaeria;o__Victivallales;f__Victivallaceae;g__Victivallis;s__Victivallis sp002998355	blast	91.9	None
RGVC464	3300012983_37	d__Bacteria;p__Bacteroidota;c__Bacteroidia;o__Bacteroidales;f__Rikenellaceae;g__Alistipes;s__	blast	91.8	None
RGVC464	GB_GCA_900769405.1	d__Bacteria;p__Bacteroidota;c__Bacteroidia;o__Bacteroidales;f__Rikenellaceae;g__Alistipes;s__Alistipes sp900769405	blast	91.5	None
RGVC466	3300018475_121	d__Bacteria;p__Firmicutes_A;c__Clostridia;o__Oscillospirales;f__Ruminococcaceae;g__UBA7477;s__	blast	90.1	None
RGVC467	2703719120	d__Bacteria;p__Firmicutes;c__Bacilli;o__RF39;f__UBA660;g__UBA3789;s__	blast	91.1	iPHoP-RF;52.50
RGVC467	GB_GCA_000433455.1	d__Bacteria;p__Firmicutes;c__Bacilli;o__RF39;f__UBA660;g__CAG-877;s__CAG-877 sp000433455	blast	92.6	None
RGVC467	GB_GCA_002369415.1	d__Bacteria;p__Firmicutes;c__Bacilli;o__RF39;f__UBA660;g__UBA3789;s__UBA3789 sp002369415	blast	91.1	None
RGVC467	GB_GCA_900314225.1	d__Bacteria;p__Firmicutes;c__Bacilli;o__RF39;f__UBA660;g__UBA3789;s__UBA3789 sp900314225	blast	91.1	None
RGVC467	GB_GCA_900543055.1	d__Bacteria;p__Firmicutes;c__Bacilli;o__RF39;f__UBA660;g__UBA3789;s__UBA3789 sp900543055	blast	91.9	None
RGVC467	GB_GCA_900548695.1	d__Bacteria;p__Firmicutes;c__Bacilli;o__RF39;f__UBA660;g__CAG-877;s__CAG-877 sp900548695	blast	93.4	None
RGVC467	GB_GCA_900552495.1	d__Bacteria;p__Firmicutes;c__Bacilli;o__RF39;f__UBA660;g__CAG-877;s__CAG-877 sp900552495	blast	93.7	None
RGVC467	GB_GCA_900554305.1	d__Bacteria;p__Firmicutes;c__Bacilli;o__RF39;f__UBA660;g__CAG-877;s__CAG-877 sp900554305	blast	91.7	None
RGVC467	GB_GCA_900554315.1	d__Bacteria;p__Firmicutes;c__Bacilli;o__RF39;f__UBA660;g__CAG-877;s__CAG-877 sp900554315	blast	93.4	None
RGVC467	GB_GCA_902767005.1	d__Bacteria;p__Firmicutes;c__Bacilli;o__RF39;f__UBA660;g__RUG11224;s__RUG11224 sp902767005	blast	91.9	None
RGVC467	GB_GCA_902783435.1	d__Bacteria;p__Firmicutes;c__Bacilli;o__RF39;f__UBA660;g__UBA3789;s__UBA3789 sp902783435	blast	91.1	None
RGVC467	RS_GCF_900753325.1	d__Bacteria;p__Firmicutes;c__Bacilli;o__RF39;f__UBA660;g__CAG-877;s__CAG-877 sp900753325	blast	93.9	None
RGVC467	RS_GCF_900768815.1	d__Bacteria;p__Firmicutes;c__Bacilli;o__RF39;f__UBA660;g__CAG-877;s__CAG-877 sp900768815	blast	91.7	None
RGVC468	RS_GCF_900767835.1	d__Bacteria;p__Firmicutes_A;c__Clostridia_A;o__Christensenellales;f__UBA1242;g__HGM11367;s__HGM11367 sp900767835	blast	94.6	iPHoP-RF;67.70
RGVC468	RS_GCF_900768425.1	d__Bacteria;p__Firmicutes_A;c__Clostridia_A;o__Christensenellales;f__UBA1242;g__HGM11367;s__HGM11367 sp900768425	blast	94.6	iPHoP-RF;62.20
RGVC469	RS_GCF_014334055.1	d__Bacteria;p__Firmicutes_A;c__Clostridia;o__Oscillospirales;f__Oscillospiraceae;g__NSJ-62;s__NSJ-62 sp014334055	blast	93.9	None
RGVC470	GB_GCA_000434635.1	d__Bacteria;p__Firmicutes_A;c__Clostridia;o__Oscillospirales;f__Oscillospiraceae;g__CAG-110;s__CAG-110 sp000434635	blast	96.9	iPHoP-RF;50.90
RGVC470	GB_GCA_900546075.1	d__Bacteria;p__Firmicutes_A;c__Clostridia;o__Oscillospirales;f__Oscillospiraceae;g__CAG-110;s__CAG-110 sp900546075	blast	96.1	None
RGVC470	3300010259_5	d__Bacteria;p__Firmicutes_A;c__Clostridia;o__Oscillospirales;f__Oscillospiraceae;g__CAG-110;s__	blast	92	None
RGVC470	GB_GCA_002437585.1	d__Bacteria;p__Firmicutes_A;c__Clostridia;o__Oscillospirales;f__Oscillospiraceae;g__CAG-110;s__CAG-110 sp002437585	blast	92	None
RGVC470	GB_GCA_900540635.1	d__Bacteria;p__Firmicutes_A;c__Clostridia;o__Oscillospirales;f__Oscillospiraceae;g__CAG-110;s__CAG-110 sp900540635	blast	92	None
RGVC470	GB_GCA_900547405.1	d__Bacteria;p__Firmicutes_A;c__Clostridia;o__Oscillospirales;f__Oscillospiraceae;g__CAG-110;s__CAG-110 sp900547405	blast	92	None
RGVC470	GB_GCA_900762245.1	d__Bacteria;p__Firmicutes_A;c__Clostridia;o__Oscillospirales;f__Oscillospiraceae;g__CAG-110;s__CAG-110 sp900762245	blast	92	None
RGVC470	GB_GCA_900763965.1	d__Bacteria;p__Firmicutes_A;c__Clostridia;o__Oscillospirales;f__Oscillospiraceae;g__CAG-110;s__CAG-110 sp900763965	blast	92	None
RGVC470	GB_GCA_900549705.1	d__Bacteria;p__Firmicutes_A;c__Clostridia;o__Oscillospirales;f__Oscillospiraceae;g__CAG-110;s__CAG-110 sp900549705	blast	91.9	None
RGVC470	GB_GCA_900544405.1	d__Bacteria;p__Firmicutes_A;c__Clostridia;o__Oscillospirales;f__Oscillospiraceae;g__CAG-110;s__CAG-110 sp900544405	blast	91.7	None
RGVC472	3300022660_169	d__Bacteria;p__Firmicutes_A;c__Clostridia_A;o__Christensenellales;f__Borkfalkiaceae;g__UBA1259;s__	blast	92.8	iPHoP-RF;51.70
RGVC472	RS_GCF_900771345.1	d__Bacteria;p__Firmicutes_A;c__Clostridia_A;o__Christensenellales;f__Borkfalkiaceae;g__UBA1259;s__UBA1259 sp900771345	blast	92.1	None
RGVC472	RS_GCF_900769565.1	d__Bacteria;p__Firmicutes_A;c__Clostridia_A;o__Christensenellales;f__Borkfalkiaceae;g__UBA1259;s__UBA1259 sp900769565	blast	90.9	iPHoP-RF;51.50
RGVC474	GB_GCA_000434635.1	d__Bacteria;p__Firmicutes_A;c__Clostridia;o__Oscillospirales;f__Oscillospiraceae;g__CAG-110;s__CAG-110 sp000434635	blast	92.6	iPHoP-RF;64.50
RGVC474	GB_GCA_900546075.1	d__Bacteria;p__Firmicutes_A;c__Clostridia;o__Oscillospirales;f__Oscillospiraceae;g__CAG-110;s__CAG-110 sp900546075	blast	90.1	iPHoP-RF;59.50
RGVC474	GB_GCA_900763965.1	d__Bacteria;p__Firmicutes_A;c__Clostridia;o__Oscillospirales;f__Oscillospiraceae;g__CAG-110;s__CAG-110 sp900763965	blast	93.8	iPHoP-RF;53.30
RGVC476	3300018427_36	d__Bacteria;p__Firmicutes_A;c__Clostridia_A;o__Christensenellales;f__CAG-74;g__;s__	blast	92.4	None
RGVC476	GB_GCA_002492415.1	d__Bacteria;p__Firmicutes_A;c__Clostridia_A;o__Christensenellales;f__UBA1750;g__UBA7102;s__UBA7102 sp002492415	blast	90.9	None
RGVC477	GB_GCA_000434635.1	d__Bacteria;p__Firmicutes_A;c__Clostridia;o__Oscillospirales;f__Oscillospiraceae;g__CAG-110;s__CAG-110 sp000434635	blast	96.9	None
RGVC478	3300029706_6	d__Bacteria;p__Bacteroidota;c__Bacteroidia;o__Bacteroidales;f__Bacteroidaceae;g__Bacteroides;s__	iPHoP-RF	93.7	None
RGVC478	RS_GCF_000154205.1	d__Bacteria;p__Bacteroidota;c__Bacteroidia;o__Bacteroidales;f__Bacteroidaceae;g__Bacteroides;s__Bacteroides uniformis	iPHoP-RF	90.1	None
RGVC478	RS_GCF_000614125.1	d__Bacteria;p__Bacteroidota;c__Bacteroidia;o__Bacteroidales;f__Bacteroidaceae;g__Bacteroides;s__Bacteroides rodentium	iPHoP-RF	95.1	None
RGVC479	GB_GCA_000432255.1	d__Bacteria;p__Firmicutes;c__Bacilli;o__RF39;f__UBA660;g__CAG-878;s__CAG-878 sp000432255	blast	93.9	None
RGVC480	RS_GCF_900757905.1	d__Bacteria;p__Firmicutes_A;c__Clostridia;o__Oscillospirales;f__CAG-382;g__UMGS882;s__UMGS882 sp900757905	blast	90.4	iPHoP-RF;59.20
RGVC484	GB_GCA_004554085.1	d__Bacteria;p__Firmicutes_A;c__Clostridia_A;o__Christensenellales;f__CAG-74;g__SFTH01;s__SFTH01 sp004554085	blast	90.9	None
RGVC484	GB_GCA_004557125.1	d__Bacteria;p__Firmicutes_A;c__Clostridia_A;o__Christensenellales;f__CAG-74;g__SFTH01;s__SFTH01 sp004557125	blast	93.6	None
RGVC484	GB_GCA_004563405.1	d__Bacteria;p__Firmicutes_A;c__Clostridia_A;o__Christensenellales;f__CAG-74;g__SFTH01;s__SFTH01 sp004563405	blast	92.4	None
RGVC484	GB_GCA_900315585.1	d__Bacteria;p__Firmicutes_A;c__Clostridia_A;o__Christensenellales;f__CAG-74;g__UBA2862;s__UBA2862 sp900315585	blast	92.9	None
RGVC484	GB_GCA_900318045.1	d__Bacteria;p__Firmicutes_A;c__Clostridia_A;o__Christensenellales;f__CAG-74;g__UBA2862;s__UBA2862 sp900318045	blast	94.9	None
RGVC484	GB_GCA_902764285.1	d__Bacteria;p__Firmicutes_A;c__Clostridia_A;o__Christensenellales;f__CAG-74;g__UBA2862;s__UBA2862 sp902764285	blast	96.1	None
RGVC484	GB_GCA_902765305.1	d__Bacteria;p__Firmicutes_A;c__Clostridia_A;o__Christensenellales;f__CAG-74;g__UBA2862;s__UBA2862 sp902765305	blast	95.2	iPHoP-RF;57.30
RGVC484	GB_GCA_902765395.1	d__Bacteria;p__Firmicutes_A;c__Clostridia_A;o__Christensenellales;f__CAG-74;g__UBA2862;s__UBA2862 sp902765395	blast	93.8	None
RGVC484	GB_GCA_902765735.1	d__Bacteria;p__Firmicutes_A;c__Clostridia_A;o__Christensenellales;f__CAG-74;g__UBA2862;s__UBA2862 sp002350605	blast	91.9	None
RGVC484	GB_GCA_902773515.1	d__Bacteria;p__Firmicutes_A;c__Clostridia_A;o__Christensenellales;f__CAG-74;g__UBA2862;s__UBA2862 sp902773515	blast	92.6	None
RGVC484	GB_GCA_902777335.1	d__Bacteria;p__Firmicutes_A;c__Clostridia_A;o__Christensenellales;f__CAG-74;g__UBA2862;s__UBA2862 sp902777335	blast	93	None
RGVC484	GB_GCA_902778045.1	d__Bacteria;p__Firmicutes_A;c__Clostridia_A;o__Christensenellales;f__CAG-74;g__UBA2862;s__UBA2862 sp902778045	blast	91.9	None
RGVC484	GB_GCA_902778995.1	d__Bacteria;p__Firmicutes_A;c__Clostridia_A;o__Christensenellales;f__CAG-74;g__UBA2862;s__UBA2862 sp902778995	blast	93.9	iPHoP-RF;55.70
RGVC484	GB_GCA_902785105.1	d__Bacteria;p__Firmicutes_A;c__Clostridia_A;o__Christensenellales;f__CAG-74;g__UBA2862;s__UBA2862 sp902785105	blast	91.5	None
RGVC484	GB_GCA_902790175.1	d__Bacteria;p__Firmicutes_A;c__Clostridia_A;o__Christensenellales;f__CAG-74;g__UBA2862;s__UBA2862 sp902790175	blast	92.6	None
RGVC484	GB_GCA_902793325.1	d__Bacteria;p__Firmicutes_A;c__Clostridia_A;o__Christensenellales;f__CAG-74;g__UBA2862;s__UBA2862 sp902793325	blast	91.9	None
RGVC484	GB_GCA_902798105.1	d__Bacteria;p__Firmicutes_A;c__Clostridia_A;o__Christensenellales;f__CAG-74;g__UBA2862;s__UBA2862 sp902798105	blast	94.4	None
RGVC484	GB_GCA_902799045.1	d__Bacteria;p__Firmicutes_A;c__Clostridia_A;o__Christensenellales;f__CAG-74;g__UBA2862;s__UBA2862 sp902799045	blast	93.1	None
RGVC484	GB_GCA_902799465.1	d__Bacteria;p__Firmicutes_A;c__Clostridia_A;o__Christensenellales;f__CAG-74;g__UBA2862;s__UBA2862 sp902799465	blast	92.3	None
RGVC484	GB_GCA_902800625.1	d__Bacteria;p__Firmicutes_A;c__Clostridia_A;o__Christensenellales;f__CAG-74;g__UBA2862;s__UBA2862 sp902800625	blast	92.2	None
RGVC484	GB_GCA_902801165.1	d__Bacteria;p__Firmicutes_A;c__Clostridia_A;o__Christensenellales;f__CAG-74;g__UBA2862;s__UBA2862 sp902801165	blast	95.6	None
RGVC485	3300022661_72	d__Bacteria;p__Verrucomicrobiota;c__Lentisphaeria;o__Victivallales;f__UBA1829;g__;s__	blast	90.2	None
RGVC486	GB_GCA_000437595.1	d__Bacteria;p__Firmicutes_A;c__Clostridia_A;o__Christensenellales;f__CAG-74;g__UBA11524;s__UBA11524 sp000437595	blast	96.9	iPHoP-RF;50.40
RGVC486	RS_GCF_900769075.1	d__Bacteria;p__Firmicutes_A;c__Clostridia_A;o__Christensenellales;f__CAG-74;g__UBA11524;s__UBA11524 sp900769075	blast	92.6	None
RGVC487	3300027276_20	d__Bacteria;p__Firmicutes_A;c__Clostridia_A;o__Christensenellales;f__CAG-74;g__SFMI01;s__	blast	90.2	None
RGVC487	GB_GCA_004557245.1	d__Bacteria;p__Firmicutes_A;c__Clostridia_A;o__Christensenellales;f__CAG-138;g__SFEL01;s__SFEL01 sp004557245	blast	96.9	iPHoP-RF;57.10
RGVC487	GB_GCA_900315585.1	d__Bacteria;p__Firmicutes_A;c__Clostridia_A;o__Christensenellales;f__CAG-74;g__UBA2862;s__UBA2862 sp900315585	blast	90.7	None
RGVC487	GB_GCA_900318045.1	d__Bacteria;p__Firmicutes_A;c__Clostridia_A;o__Christensenellales;f__CAG-74;g__UBA2862;s__UBA2862 sp900318045	blast	95.8	None
RGVC487	GB_GCA_902761825.1	d__Bacteria;p__Firmicutes_A;c__Clostridia_A;o__Christensenellales;f__CAG-74;g__SFMI01;s__SFMI01 sp902761825	blast	90.6	None
RGVC487	GB_GCA_902781945.1	d__Bacteria;p__Firmicutes_A;c__Clostridia_A;o__Christensenellales;f__CAG-74;g__SFMI01;s__SFMI01 sp902781945	blast	90	None
RGVC487	GB_GCA_902787835.1	d__Bacteria;p__Firmicutes_A;c__Clostridia_A;o__Christensenellales;f__CAG-74;g__SFMI01;s__SFMI01 sp902787835	blast	91	None
RGVC487	GB_GCA_902799045.1	d__Bacteria;p__Firmicutes_A;c__Clostridia_A;o__Christensenellales;f__CAG-74;g__UBA2862;s__UBA2862 sp902799045	blast	90.4	None
RGVC489	GB_GCA_000434555.1	d__Bacteria;p__Firmicutes;c__Bacilli;o__RF39;f__UBA660;g__CAG-1000;s__CAG-1000 sp000434555	blast	91.7	iPHoP-RF;66.30
RGVC489	GB_GCA_000436975.1	d__Bacteria;p__Firmicutes;c__Bacilli;o__RF39;f__UBA660;g__CAG-1000;s__CAG-1000 sp000436975	blast	91.7	None
RGVC489	GB_GCA_004552445.1	d__Bacteria;p__Firmicutes;c__Bacilli;o__RF39;f__UBA660;g__CAG-1000;s__CAG-1000 sp004552445	blast	92.3	iPHoP-RF;74.60
RGVC489	GB_GCA_004560915.1	d__Bacteria;p__Firmicutes;c__Bacilli;o__RF39;f__UBA660;g__CAG-1000;s__CAG-1000 sp004560915	blast	90.3	iPHoP-RF;63.80
RGVC489	GB_GCA_012512795.1	d__Bacteria;p__Firmicutes;c__Bacilli;o__RF39;f__UBA660;g__CAG-1000;s__CAG-1000 sp012512795	blast	91.8	None
RGVC489	GB_GCA_900313815.1	d__Bacteria;p__Firmicutes;c__Bacilli;o__RF39;f__UBA660;g__CAG-1000;s__CAG-1000 sp900313815	blast	91.7	iPHoP-RF;66.50
RGVC489	GB_GCA_900556025.1	d__Bacteria;p__Firmicutes;c__Bacilli;o__RF39;f__UBA660;g__CAG-1000;s__CAG-1000 sp900556025	blast	91.7	iPHoP-RF;66.30
RGVC489	GB_GCA_902761685.1	d__Bacteria;p__Firmicutes;c__Bacilli;o__RF39;f__UBA660;g__CAG-1000;s__CAG-1000 sp902761685	blast	93.4	iPHoP-RF;69.30
RGVC489	GB_GCA_902764145.1	d__Bacteria;p__Firmicutes;c__Bacilli;o__RF39;f__UBA660;g__CAG-1000;s__CAG-1000 sp902764145	blast	91.7	iPHoP-RF;69.80
RGVC489	GB_GCA_902775285.1	d__Bacteria;p__Firmicutes;c__Bacilli;o__RF39;f__UBA660;g__CAG-1000;s__CAG-1000 sp902775285	blast	91.9	iPHoP-RF;66.00
RGVC489	GB_GCA_902778125.1	d__Bacteria;p__Firmicutes;c__Bacilli;o__RF39;f__UBA660;g__CAG-1000;s__CAG-1000 sp902778125	blast	91.7	iPHoP-RF;64.00
RGVC489	RS_GCF_900761555.1	d__Bacteria;p__Firmicutes;c__Bacilli;o__RF39;f__UBA660;g__CAG-1000;s__CAG-1000 sp900761555	blast	91.7	iPHoP-RF;73.00
RGVC489	RS_GCF_900768345.1	d__Bacteria;p__Firmicutes;c__Bacilli;o__RF39;f__UBA660;g__CAG-1000;s__CAG-1000 sp900768345	blast	93.9	iPHoP-RF;72.80
RGVC489	RS_GCF_900772435.1	d__Bacteria;p__Firmicutes;c__Bacilli;o__RF39;f__UBA660;g__CAG-1000;s__CAG-1000 sp900772435	blast	93.3	iPHoP-RF;73.90
RGVC492	2703719135	d__Bacteria;p__Firmicutes_A;c__Clostridia;o__Lachnospirales;f__Lachnospiraceae;g__Acetatifactor;s__	blast	91.7	iPHoP-RF;52.20
RGVC492	3300010275_16	d__Bacteria;p__Firmicutes_A;c__Clostridia;o__Lachnospirales;f__Lachnospiraceae;g__Acetatifactor;s__	blast	93.7	iPHoP-RF;73.70
RGVC492	3300021319_11	d__Bacteria;p__Firmicutes_A;c__Clostridia;o__Lachnospirales;f__Lachnospiraceae;g__Acetatifactor;s__	blast	91.7	iPHoP-RF;51.50
RGVC492	GB_GCA_001916965.1	d__Bacteria;p__Firmicutes_A;c__Clostridia;o__Lachnospirales;f__Lachnospiraceae;g__COE1;s__COE1 sp001916965	blast	91.2	None
RGVC492	GB_GCA_002314715.1	d__Bacteria;p__Firmicutes_A;c__Clostridia;o__Lachnospirales;f__Lachnospiraceae;g__Acetatifactor;s__Acetatifactor sp002314715	blast	91.7	None
RGVC492	GB_GCA_002431915.1	d__Bacteria;p__Firmicutes_A;c__Clostridia;o__Lachnospirales;f__Lachnospiraceae;g__Acetatifactor;s__Acetatifactor sp002431915	blast	93.7	iPHoP-RF;80.60
RGVC492	GB_GCA_002432425.1	d__Bacteria;p__Firmicutes_A;c__Clostridia;o__Lachnospirales;f__Lachnospiraceae;g__CAG-510;s__CAG-510 sp002432425	blast	91.8	iPHoP-RF;68.40
RGVC492	GB_GCA_003447295.1	d__Bacteria;p__Firmicutes_A;c__Clostridia;o__Lachnospirales;f__Lachnospiraceae;g__Acetatifactor;s__Acetatifactor sp003447295	blast	93.7	iPHoP-RF;83.90
RGVC492	GB_GCA_012520645.1	d__Bacteria;p__Firmicutes_A;c__Clostridia;o__Lachnospirales;f__Lachnospiraceae;g__JAAYNV01;s__JAAYNV01 sp012520645	blast	91.2	None
RGVC492	GB_GCA_013316825.1	d__Bacteria;p__Firmicutes_A;c__Clostridia;o__Lachnospirales;f__Lachnospiraceae;g__CAG-510;s__CAG-510 sp003979355	blast	91.2	None
RGVC492	GB_GCA_014337175.1	d__Bacteria;p__Firmicutes_A;c__Clostridia;o__Lachnospirales;f__Lachnospiraceae;g__Acetatifactor;s__Acetatifactor sp900066365	blast	93.9	iPHoP-RF;80.60
RGVC492	GB_GCA_900550475.1	d__Bacteria;p__Firmicutes_A;c__Clostridia;o__Lachnospirales;f__Lachnospiraceae;g__CAG-510;s__CAG-510 sp900550475	blast	91.8	iPHoP-RF;73.90
RGVC492	GB_GCA_900551115.1	d__Bacteria;p__Firmicutes_A;c__Clostridia;o__Lachnospirales;f__Lachnospiraceae;g__CAG-510;s__CAG-510 sp900551115	blast	91.8	iPHoP-RF;67.30
RGVC492	GB_GCA_900554205.1	d__Bacteria;p__Firmicutes_A;c__Clostridia;o__Lachnospirales;f__Lachnospiraceae;g__Acetatifactor;s__Acetatifactor sp900554205	blast	91.8	iPHoP-RF;80.00
RGVC492	GB_GCA_902766425.1	d__Bacteria;p__Firmicutes_A;c__Clostridia;o__Lachnospirales;f__Lachnospiraceae;g__Acetatifactor;s__Acetatifactor sp902766425	blast	91.7	iPHoP-RF;54.90
RGVC492	RS_GCF_003584705.1	d__Bacteria;p__Firmicutes_A;c__Clostridia;o__Lachnospirales;f__Lachnospiraceae;g__Acetatifactor;s__Acetatifactor sp900066565	blast	93.6	iPHoP-RF;89.50
RGVC492	RS_GCF_900248245.1	d__Bacteria;p__Firmicutes_A;c__Clostridia;o__Lachnospirales;f__Lachnospiraceae;g__Acetatifactor;s__Acetatifactor muris	blast	91.7	iPHoP-RF;58.70
RGVC492	RS_GCF_900753305.1	d__Bacteria;p__Firmicutes_A;c__Clostridia;o__Lachnospirales;f__Lachnospiraceae;g__COE1;s__COE1 sp900753305	blast	91.2	iPHoP-RF;52.80
RGVC492	RS_GCF_900755865.1	d__Bacteria;p__Firmicutes_A;c__Clostridia;o__Lachnospirales;f__Lachnospiraceae;g__Acetatifactor;s__Acetatifactor sp900755865	blast	91.8	iPHoP-RF;75.20
RGVC492	RS_GCF_900760705.1	d__Bacteria;p__Firmicutes_A;c__Clostridia;o__Lachnospirales;f__Lachnospiraceae;g__Acetatifactor;s__Acetatifactor sp900760705	blast	91.7	iPHoP-RF;75.90
RGVC492	RS_GCF_900766575.1	d__Bacteria;p__Firmicutes_A;c__Clostridia;o__Lachnospirales;f__Lachnospiraceae;g__Acetatifactor;s__Acetatifactor sp900766575	blast	93.7	iPHoP-RF;82.20
RGVC492	RS_GCF_900771995.1	d__Bacteria;p__Firmicutes_A;c__Clostridia;o__Lachnospirales;f__Lachnospiraceae;g__Acetatifactor;s__Acetatifactor sp900771995	blast	93.7	iPHoP-RF;82.20
RGVC492	RS_GCF_900772845.1	d__Bacteria;p__Firmicutes_A;c__Clostridia;o__Lachnospirales;f__Lachnospiraceae;g__Acetatifactor;s__Acetatifactor sp900772845	blast	93.7	iPHoP-RF;83.90
RGVC493	RS_GCF_900626145.1	d__Bacteria;p__Firmicutes_A;c__Clostridia;o__Oscillospirales;f__Oscillospiraceae;g__Intestinimonas;s__Intestinimonas timonensis	blast	91.8	None
RGVC494	3300008622_32	d__Bacteria;p__Firmicutes_A;c__Clostridia_A;o__Christensenellales;f__Borkfalkiaceae;g__QALS01;s__	blast	90.1	iPHoP-RF;60.10
RGVC494	GB_GCA_900555925.1	d__Bacteria;p__Firmicutes_A;c__Clostridia_A;o__Christensenellales;f__Borkfalkiaceae;g__QALS01;s__QALS01 sp900555925	blast	90.3	iPHoP-RF;66.30
RGVC495	GB_GCA_900544605.1	d__Bacteria;p__Firmicutes;c__Bacilli;o__RF39;f__UBA660;g__UBA3631;s__UBA3631 sp900544605	blast	93	None
RGVC495	GB_GCA_900546275.1	d__Bacteria;p__Firmicutes;c__Bacilli;o__RF39;f__UBA660;g__UBA3631;s__UBA3631 sp900546275	blast	91.8	None
RGVC497	3300022377_6	d__Bacteria;p__Bacteroidota;c__Bacteroidia;o__Bacteroidales;f__Bacteroidaceae;g__Phocaeicola;s__	blast	91.8	iPHoP-RF;51.50
RGVC499	GB_GCA_900547645.1	d__Bacteria;p__Firmicutes_A;c__Clostridia_A;o__Christensenellales;f__Borkfalkiaceae;g__UMGS1004;s__UMGS1004 sp900547645	blast	94.8	None
RGVC499	GB_GCA_003343805.1	d__Bacteria;p__Firmicutes_A;c__Clostridia_A;o__Christensenellales;f__Borkfalkiaceae;g__UMGS1004;s__UMGS1004 sp003343805	blast	91	None
RGVC499	3300005460_68	d__Bacteria;p__Firmicutes_A;c__Clostridia_A;o__Christensenellales;f__Borkfalkiaceae;g__UMGS1004;s__	blast	90.9	None
RGVC499	GB_GCA_900548285.1	d__Bacteria;p__Firmicutes_A;c__Clostridia_A;o__Christensenellales;f__Borkfalkiaceae;g__UBA10281;s__UBA10281 sp900548285	blast	90.4	None
RGVC499	RS_GCF_900761685.1	d__Bacteria;p__Firmicutes_A;c__Clostridia_A;o__Christensenellales;f__Borkfalkiaceae;g__UMGS1004;s__UMGS1004 sp900761685	blast	90.3	None
RGVC500	GB_GCA_002394125.1	d__Bacteria;p__Firmicutes_A;c__Clostridia;o__Oscillospirales;f__Ruminococcaceae;g__Firm-04;s__Firm-04 sp002394125	blast	94.3	iPHoP-RF;56.00
RGVC500	GB_GCA_002395085.1	d__Bacteria;p__Firmicutes_A;c__Clostridia;o__Oscillospirales;f__Ruminococcaceae;g__Firm-04;s__Firm-04 sp002395085	blast	93.1	iPHoP-RF;52.00
RGVC500	GB_GCA_003446315.1	d__Bacteria;p__Firmicutes_A;c__Clostridia;o__Oscillospirales;f__Ruminococcaceae;g__Firm-04;s__Firm-04 sp003446315	blast	90.5	None
RGVC501	3300006428_5	d__Bacteria;p__Firmicutes_A;c__Clostridia;o__Oscillospirales;f__Oscillospiraceae;g__Oscillibacter;s__	blast	90.4	None
RGVC501	3300010278_23	d__Bacteria;p__Firmicutes_A;c__Clostridia;o__Oscillospirales;f__Oscillospiraceae;g__Dysosmobacter;s__	blast	96.9	iPHoP-RF;74.80
RGVC501	3300010282_24	d__Bacteria;p__Firmicutes_A;c__Clostridia;o__Oscillospirales;f__Oscillospiraceae;g__;s__	blast	96.2	iPHoP-RF;61.10
RGVC501	3300012889_21	d__Bacteria;p__Firmicutes_A;c__Clostridia;o__Oscillospirales;f__Oscillospiraceae;g__;s__	blast	96.8	iPHoP-RF;62.20
RGVC501	GB_GCA_000436875.1	d__Bacteria;p__Firmicutes_A;c__Clostridia;o__Oscillospirales;f__Oscillospiraceae;g__Dysosmobacter;s__Dysosmobacter sp000436875	blast	96.8	iPHoP-RF;69.50
RGVC501	GB_GCA_004558115.1	d__Bacteria;p__Firmicutes_A;c__Clostridia;o__Oscillospirales;f__Oscillospiraceae;g__Dysosmobacter;s__Dysosmobacter sp004558115	blast	96.9	iPHoP-RF;77.30
RGVC501	GB_GCA_009774015.1	d__Bacteria;p__Firmicutes_A;c__Clostridia;o__Oscillospirales;f__Oscillospiraceae;g__Dysosmobacter;s__Dysosmobacter sp009774015	blast	96.8	None
RGVC501	GB_GCA_900544955.1	d__Bacteria;p__Firmicutes_A;c__Clostridia;o__Oscillospirales;f__Oscillospiraceae;g__Dysosmobacter;s__Dysosmobacter sp900544955	blast	96.8	iPHoP-RF;71.50
RGVC501	GB_GCA_900554425.1	d__Bacteria;p__Firmicutes_A;c__Clostridia;o__Oscillospirales;f__Oscillospiraceae;g__Dysosmobacter;s__Dysosmobacter sp900554425	blast	96.6	iPHoP-RF;56.20
RGVC501	GB_GCA_900752075.1	d__Bacteria;p__Firmicutes_A;c__Clostridia;o__Oscillospirales;f__Oscillospiraceae;g__Dysosmobacter;s__Dysosmobacter sp900752075	blast	96.7	iPHoP-RF;68.40
RGVC501	GB_GCA_900770295.1	d__Bacteria;p__Firmicutes_A;c__Clostridia;o__Oscillospirales;f__Oscillospiraceae;g__Dysosmobacter;s__Dysosmobacter sp900770295	blast	96.9	iPHoP-RF;70.60
RGVC501	RS_GCF_000403435.2	d__Bacteria;p__Firmicutes_A;c__Clostridia;o__Oscillospirales;f__Oscillospiraceae;g__Dysosmobacter;s__Dysosmobacter sp000403435	blast	96.9	iPHoP-RF;60.30
RGVC501	RS_GCF_005121165.1	d__Bacteria;p__Firmicutes_A;c__Clostridia;o__Oscillospirales;f__Oscillospiraceae;g__Dysosmobacter;s__Dysosmobacter welbionis	blast	95.1	iPHoP-RF;61.40
RGVC501	RS_GCF_014297285.1	d__Bacteria;p__Firmicutes_A;c__Clostridia;o__Oscillospirales;f__Oscillospiraceae;g__Dysosmobacter;s__Dysosmobacter sp001916835	blast	91.7	iPHoP-RF;61.90
RGVC501	RS_GCF_014334055.1	d__Bacteria;p__Firmicutes_A;c__Clostridia;o__Oscillospirales;f__Oscillospiraceae;g__NSJ-62;s__NSJ-62 sp014334055	blast	91.9	None
RGVC503	RS_GCF_008121495.1	d__Bacteria;p__Firmicutes_A;c__Clostridia;o__Lachnospirales;f__Lachnospiraceae;g__Ruminococcus_B;s__Ruminococcus_B gnavus	blast	91.6	iPHoP-RF;89.80
RGVC503	RS_GCF_014287475.1	d__Bacteria;p__Firmicutes_A;c__Clostridia;o__Lachnospirales;f__Lachnospiraceae;g__Mediterraneibacter;s__Mediterraneibacter sp014287475	blast	91.5	iPHoP-RF;91.10
RGVC506	GB_GCA_000432255.1	d__Bacteria;p__Firmicutes;c__Bacilli;o__RF39;f__UBA660;g__CAG-878;s__CAG-878 sp000432255	blast	93.3	None
RGVC507	3300020079_22	d__Bacteria;p__Firmicutes_A;c__Clostridia;o__Oscillospirales;f__Oscillospiraceae;g__CAG-110;s__	blast	91.8	None
RGVC509	GB_GCA_900544605.1	d__Bacteria;p__Firmicutes;c__Bacilli;o__RF39;f__UBA660;g__UBA3631;s__UBA3631 sp900544605	blast	90.1	None
RGVC509	GB_GCA_900546275.1	d__Bacteria;p__Firmicutes;c__Bacilli;o__RF39;f__UBA660;g__UBA3631;s__UBA3631 sp900546275	blast	93.6	None
RGVC510	RS_GCF_001244995.1	d__Bacteria;p__Firmicutes_A;c__Clostridia;o__Oscillospirales;f__Oscillospiraceae;g__Intestinimonas;s__Intestinimonas massiliensis	blast	91.9	iPHoP-RF;57.10
RGVC511	RS_GCF_900626285.1	d__Bacteria;p__Firmicutes_A;c__Clostridia;o__Oscillospirales;f__Oscillospiraceae;g__Flavonifractor;s__Flavonifractor massiliensis_A	blast	93.9	None
RGVC512	GB_GCA_900317365.1	d__Bacteria;p__Planctomycetota;c__Planctomycetes;o__Pirellulales;f__Thermoguttaceae;g__RUG369;s__RUG369 sp900317365	blast	94.8	iPHoP-RF;67.50
RGVC513	GB_GCA_900542395.1	d__Bacteria;p__Firmicutes_A;c__Clostridia_A;o__Christensenellales;f__CAG-74;g__SFFH01;s__SFFH01 sp900542395	blast	96.9	None
RGVC513	GB_GCA_900542445.1	d__Bacteria;p__Firmicutes_A;c__Clostridia_A;o__Christensenellales;f__CAG-74;g__SFFH01;s__SFFH01 sp900542445	blast	96.9	None
RGVC513	3300010278_24	d__Bacteria;p__Firmicutes_A;c__Clostridia_A;o__Christensenellales;f__CAG-74;g__SFFH01;s__	blast	96.6	iPHoP-RF;54.90
RGVC513	GB_GCA_900548125.1	d__Bacteria;p__Firmicutes_A;c__Clostridia_A;o__Christensenellales;f__CAG-74;g__SFFH01;s__SFFH01 sp900548125	blast	96.4	iPHoP-RF;54.40
RGVC513	GB_GCA_004557905.1	d__Bacteria;p__Firmicutes_A;c__Clostridia_A;o__Christensenellales;f__CAG-74;g__SFFH01;s__SFFH01 sp004557905	blast	93.9	None
RGVC513	GB_GCA_902781095.1	d__Bacteria;p__Firmicutes_A;c__Clostridia_A;o__Christensenellales;f__CAG-74;g__SFFH01;s__SFFH01 sp902781095	blast	92.7	None
RGVC514	GB_GCA_000432135.1	d__Bacteria;p__Firmicutes_A;c__Clostridia;o__Oscillospirales;f__Oscillospiraceae;g__CAG-170;s__CAG-170 sp000432135	CRISPR	93.3	blast;72.90
RGVC514	GB_GCA_000436735.1	d__Bacteria;p__Firmicutes_A;c__Clostridia;o__Oscillospirales;f__Oscillospiraceae;g__CAG-170;s__CAG-170 sp000436735	blast	93.5	iPHoP-RF;51.50
RGVC515	3300022661_91	d__Bacteria;p__Bacteroidota;c__Bacteroidia;o__Bacteroidales;f__Rikenellaceae;g__Alistipes;s__	blast	91.8	iPHoP-RF;50.90
RGVC515	RS_GCF_000154465.1	d__Bacteria;p__Bacteroidota;c__Bacteroidia;o__Bacteroidales;f__Rikenellaceae;g__Alistipes;s__Alistipes putredinis	blast	92.4	iPHoP-RF;66.30
RGVC516	RS_GCF_900199635.1	d__Bacteria;p__Firmicutes_A;c__Clostridia;o__Oscillospirales;f__Ruminococcaceae;g__Anaerotruncus;s__Anaerotruncus massiliensis	blast	90.9	None
RGVC517	3300029438_23	d__Bacteria;p__Firmicutes_A;c__Clostridia;o__Oscillospirales;f__Oscillospiraceae;g__CAG-83;s__	blast	91.7	iPHoP-RF;70.60
RGVC517	GB_GCA_000435975.1	d__Bacteria;p__Firmicutes_A;c__Clostridia;o__Oscillospirales;f__Oscillospiraceae;g__CAG-83;s__CAG-83 sp000435975	blast	90.3	iPHoP-RF;72.40
RGVC517	GB_GCA_001916855.1	d__Bacteria;p__Firmicutes_A;c__Clostridia;o__Oscillospirales;f__Oscillospiraceae;g__CAG-83;s__CAG-83 sp001916855	blast	91.1	iPHoP-RF;76.10
RGVC524	3300022661_128	d__Bacteria;p__Firmicutes_A;c__Clostridia;o__Oscillospirales;f__CAG-272;g__;s__	blast	91.7	None
RGVC525	GB_GCA_900770295.1	d__Bacteria;p__Firmicutes_A;c__Clostridia;o__Oscillospirales;f__Oscillospiraceae;g__Dysosmobacter;s__Dysosmobacter sp900770295	blast	93.6	iPHoP-RF;81.10
RGVC525	RS_GCF_000239295.1	d__Bacteria;p__Firmicutes_A;c__Clostridia;o__Oscillospirales;f__Oscillospiraceae;g__Flavonifractor;s__Flavonifractor plautii	blast	90	None
RGVC526	GB_GCA_900546275.1	d__Bacteria;p__Firmicutes;c__Bacilli;o__RF39;f__UBA660;g__UBA3631;s__UBA3631 sp900546275	blast	93.8	None
RGVC526	GB_GCA_900544605.1	d__Bacteria;p__Firmicutes;c__Bacilli;o__RF39;f__UBA660;g__UBA3631;s__UBA3631 sp900544605	blast	91.7	None
RGVC527	3300022660_140	d__Bacteria;p__Firmicutes_A;c__Clostridia;o__Oscillospirales;f__Oscillospiraceae;g__CAG-110;s__	blast	92.1	None
RGVC527	GB_GCA_000434635.1	d__Bacteria;p__Firmicutes_A;c__Clostridia;o__Oscillospirales;f__Oscillospiraceae;g__CAG-110;s__CAG-110 sp000434635	blast	90	iPHoP-RF;80.30
RGVC527	GB_GCA_002362625.1	d__Bacteria;p__Firmicutes_A;c__Clostridia;o__Oscillospirales;f__Oscillospiraceae;g__CAG-110;s__CAG-110 sp002362625	blast	90.2	iPHoP-RF;57.60
RGVC527	GB_GCA_002436765.1	d__Bacteria;p__Firmicutes_A;c__Clostridia;o__Oscillospirales;f__Oscillospiraceae;g__CAG-110;s__CAG-110 sp002436765	blast	91.7	iPHoP-RF;56.00
RGVC527	GB_GCA_900546075.1	d__Bacteria;p__Firmicutes_A;c__Clostridia;o__Oscillospirales;f__Oscillospiraceae;g__CAG-110;s__CAG-110 sp900546075	blast	92.1	iPHoP-RF;77.30
RGVC529	GB_GCA_900548505.1	d__Bacteria;p__Firmicutes_A;c__Clostridia;o__Oscillospirales;f__Oscillospiraceae;g__Dysosmobacter;s__Dysosmobacter sp900548505	blast	90.4	iPHoP-RF;54.10
RGVC529	GB_GCA_900551885.1	d__Bacteria;p__Firmicutes_A;c__Clostridia;o__Oscillospirales;f__Oscillospiraceae;g__Dysosmobacter;s__Dysosmobacter sp900551885	blast	90.4	None
RGVC530	RS_GCF_009496165.1	d__Bacteria;p__Firmicutes;c__Bacilli;o__Lactobacillales;f__Streptococcaceae;g__Streptococcus;s__Streptococcus mitis_BM	blast	96.5	None
RGVC530	RS_GCF_000148585.2	d__Bacteria;p__Firmicutes;c__Bacilli;o__Lactobacillales;f__Streptococcaceae;g__Streptococcus;s__Streptococcus mitis	blast	96.4	None
RGVC530	RS_GCF_000187745.1	d__Bacteria;p__Firmicutes;c__Bacilli;o__Lactobacillales;f__Streptococcaceae;g__Streptococcus;s__Streptococcus sp000187745	blast	96.3	None
RGVC530	RS_GCF_001074975.1	d__Bacteria;p__Firmicutes;c__Bacilli;o__Lactobacillales;f__Streptococcaceae;g__Streptococcus;s__Streptococcus pseudopneumoniae_D	blast	96	None
RGVC530	RS_GCF_001810785.1	d__Bacteria;p__Firmicutes;c__Bacilli;o__Lactobacillales;f__Streptococcaceae;g__Streptococcus;s__Streptococcus sp001810785	blast	96	None
RGVC530	3300006980_1	d__Bacteria;p__Firmicutes;c__Bacilli;o__Lactobacillales;f__Streptococcaceae;g__Streptococcus;s__	blast	95.9	None
RGVC530	RS_GCF_001070815.1	d__Bacteria;p__Firmicutes;c__Bacilli;o__Lactobacillales;f__Streptococcaceae;g__Streptococcus;s__Streptococcus pseudopneumoniae_P	blast	95.9	None
RGVC530	RS_GCF_001074635.1	d__Bacteria;p__Firmicutes;c__Bacilli;o__Lactobacillales;f__Streptococcaceae;g__Streptococcus;s__Streptococcus mitis_E	blast	95.8	None
RGVC530	RS_GCF_000722765.2	d__Bacteria;p__Firmicutes;c__Bacilli;o__Lactobacillales;f__Streptococcaceae;g__Streptococcus;s__Streptococcus mitis_AQ	blast	95.5	None
RGVC530	RS_GCF_002087075.1	d__Bacteria;p__Firmicutes;c__Bacilli;o__Lactobacillales;f__Streptococcaceae;g__Streptococcus;s__Streptococcus pseudopneumoniae	blast	95.5	None
RGVC530	RS_GCF_903645285.1	d__Bacteria;p__Firmicutes;c__Bacilli;o__Lactobacillales;f__Streptococcaceae;g__Streptococcus;s__Streptococcus sp903645285	blast	95.3	None
RGVC530	RS_GCF_003942865.1	d__Bacteria;p__Firmicutes;c__Bacilli;o__Lactobacillales;f__Streptococcaceae;g__Streptococcus;s__Streptococcus mitis_BI	blast	95	None
RGVC530	RS_GCF_000722685.1	d__Bacteria;p__Firmicutes;c__Bacilli;o__Lactobacillales;f__Streptococcaceae;g__Streptococcus;s__Streptococcus mitis_M	blast	94.9	None
RGVC530	RS_GCF_002096755.1	d__Bacteria;p__Firmicutes;c__Bacilli;o__Lactobacillales;f__Streptococcaceae;g__Streptococcus;s__Streptococcus mitis_AC	blast	94.2	None
RGVC530	RS_GCF_002860905.1	d__Bacteria;p__Firmicutes;c__Bacilli;o__Lactobacillales;f__Streptococcaceae;g__Streptococcus;s__Streptococcus oralis_BA	blast	94.2	None
RGVC530	RS_GCF_009496205.1	d__Bacteria;p__Firmicutes;c__Bacilli;o__Lactobacillales;f__Streptococcaceae;g__Streptococcus;s__Streptococcus mitis_BN	blast	94.2	None
RGVC530	RS_GCF_013305725.1	d__Bacteria;p__Firmicutes;c__Bacilli;o__Lactobacillales;f__Streptococcaceae;g__Streptococcus;s__Streptococcus mitis_BO	blast	94.1	None
RGVC530	RS_GCF_002096835.1	d__Bacteria;p__Firmicutes;c__Bacilli;o__Lactobacillales;f__Streptococcaceae;g__Streptococcus;s__Streptococcus mitis_W	blast	94	None
RGVC530	RS_GCF_003943935.1	d__Bacteria;p__Firmicutes;c__Bacilli;o__Lactobacillales;f__Streptococcaceae;g__Streptococcus;s__Streptococcus mitis_BK	blast	94	None
RGVC530	GB_GCA_001914195.1	d__Bacteria;p__Firmicutes;c__Bacilli;o__Lactobacillales;f__Streptococcaceae;g__Streptococcus;s__Streptococcus mitis_F	blast	93.8	None
RGVC530	RS_GCF_002096845.1	d__Bacteria;p__Firmicutes;c__Bacilli;o__Lactobacillales;f__Streptococcaceae;g__Streptococcus;s__Streptococcus mitis_A	blast	93.8	None
RGVC530	GB_GCA_000385835.1	d__Bacteria;p__Firmicutes;c__Bacilli;o__Lactobacillales;f__Streptococcaceae;g__Streptococcus;s__Streptococcus mitis_AI	blast	93.7	None
RGVC530	RS_GCF_001074825.1	d__Bacteria;p__Firmicutes;c__Bacilli;o__Lactobacillales;f__Streptococcaceae;g__Streptococcus;s__Streptococcus pseudopneumoniae_C	blast	93.7	None
RGVC530	RS_GCF_002005545.1	d__Bacteria;p__Firmicutes;c__Bacilli;o__Lactobacillales;f__Streptococcaceae;g__Streptococcus;s__Streptococcus mitis_I	blast	93.7	None
RGVC530	RS_GCF_002096925.1	d__Bacteria;p__Firmicutes;c__Bacilli;o__Lactobacillales;f__Streptococcaceae;g__Streptococcus;s__Streptococcus mitis_AF	blast	93.7	None
RGVC530	RS_GCF_000220085.1	d__Bacteria;p__Firmicutes;c__Bacilli;o__Lactobacillales;f__Streptococcaceae;g__Streptococcus;s__Streptococcus mitis_K	blast	93.6	None
RGVC530	RS_GCF_001070805.1	d__Bacteria;p__Firmicutes;c__Bacilli;o__Lactobacillales;f__Streptococcaceae;g__Streptococcus;s__Streptococcus pseudopneumoniae_O	blast	93.6	None
RGVC530	RS_GCF_001347015.1	d__Bacteria;p__Firmicutes;c__Bacilli;o__Lactobacillales;f__Streptococcaceae;g__Streptococcus;s__Streptococcus pneumoniae_E	blast	93.6	None
RGVC530	RS_GCF_001560895.1	d__Bacteria;p__Firmicutes;c__Bacilli;o__Lactobacillales;f__Streptococcaceae;g__Streptococcus;s__Streptococcus mitis_Q	blast	93.6	None
RGVC530	RS_GCF_001579045.1	d__Bacteria;p__Firmicutes;c__Bacilli;o__Lactobacillales;f__Streptococcaceae;g__Streptococcus;s__Streptococcus mitis_D	blast	93.3	None
RGVC530	RS_GCF_002096815.1	d__Bacteria;p__Firmicutes;c__Bacilli;o__Lactobacillales;f__Streptococcaceae;g__Streptococcus;s__Streptococcus mitis_AD	blast	93.3	None
RGVC530	RS_GCF_002096895.1	d__Bacteria;p__Firmicutes;c__Bacilli;o__Lactobacillales;f__Streptococcaceae;g__Streptococcus;s__Streptococcus mitis_AH	blast	93.1	None
RGVC530	GB_GCA_001579665.1	d__Bacteria;p__Firmicutes;c__Bacilli;o__Lactobacillales;f__Streptococcaceae;g__Streptococcus;s__Streptococcus mitis_S	blast	92.9	None
RGVC530	RS_GCF_003942765.1	d__Bacteria;p__Firmicutes;c__Bacilli;o__Lactobacillales;f__Streptococcaceae;g__Streptococcus;s__Streptococcus mitis_BE	blast	92.6	None
RGVC530	RS_GCF_001457635.1	d__Bacteria;p__Firmicutes;c__Bacilli;o__Lactobacillales;f__Streptococcaceae;g__Streptococcus;s__Streptococcus pneumoniae	blast	91.8	None
RGVC530	RS_GCF_000186445.1	d__Bacteria;p__Firmicutes;c__Bacilli;o__Lactobacillales;f__Streptococcaceae;g__Streptococcus;s__Streptococcus agalactiae	blast	91.6	None
RGVC530	RS_GCF_001983955.1	d__Bacteria;p__Firmicutes;c__Bacilli;o__Lactobacillales;f__Streptococcaceae;g__Streptococcus;s__Streptococcus oralis_H	blast	91	None
RGVC530	GB_GCA_900555155.1	d__Bacteria;p__Firmicutes;c__Bacilli;o__Lactobacillales;f__Streptococcaceae;g__Streptococcus;s__Streptococcus sp900555155	blast	90.9	None
RGVC530	RS_GCF_002355895.1	d__Bacteria;p__Firmicutes;c__Bacilli;o__Lactobacillales;f__Streptococcaceae;g__Streptococcus;s__Streptococcus sp002355895	blast	90.9	None
RGVC530	RS_GCF_003942795.1	d__Bacteria;p__Firmicutes;c__Bacilli;o__Lactobacillales;f__Streptococcaceae;g__Streptococcus;s__Streptococcus mitis_BJ	blast	90.9	None
RGVC530	RS_GCF_900637025.1	d__Bacteria;p__Firmicutes;c__Bacilli;o__Lactobacillales;f__Streptococcaceae;g__Streptococcus;s__Streptococcus oralis	blast	90.9	None
RGVC530	RS_GCF_002386345.1	d__Bacteria;p__Firmicutes;c__Bacilli;o__Lactobacillales;f__Streptococcaceae;g__Streptococcus;s__Streptococcus oralis_S	blast	90.8	None
RGVC530	RS_GCF_003942675.1	d__Bacteria;p__Firmicutes;c__Bacilli;o__Lactobacillales;f__Streptococcaceae;g__Streptococcus;s__Streptococcus oralis_BC	blast	90.6	None
RGVC530	3300007302_2	d__Bacteria;p__Firmicutes;c__Bacilli;o__Lactobacillales;f__Streptococcaceae;g__Streptococcus;s__	blast	90.3	None
RGVC530	RS_GCF_003943395.1	d__Bacteria;p__Firmicutes;c__Bacilli;o__Lactobacillales;f__Streptococcaceae;g__Streptococcus;s__Streptococcus oralis_BF	blast	90.3	None
RGVC530	RS_GCF_001075675.1	d__Bacteria;p__Firmicutes;c__Bacilli;o__Lactobacillales;f__Streptococcaceae;g__Streptococcus;s__Streptococcus oralis_V	blast	90.2	None
RGVC530	RS_GCF_010604095.1	d__Bacteria;p__Firmicutes;c__Bacilli;o__Lactobacillales;f__Streptococcaceae;g__Streptococcus;s__Streptococcus sp000187445	blast	90.2	None
RGVC530	RS_GCF_000294495.1	d__Bacteria;p__Firmicutes;c__Bacilli;o__Lactobacillales;f__Streptococcaceae;g__Streptococcus;s__Streptococcus suis	blast	90.1	None
RGVC530	RS_GCF_003943735.1	d__Bacteria;p__Firmicutes;c__Bacilli;o__Lactobacillales;f__Streptococcaceae;g__Streptococcus;s__Streptococcus sanguinis_E	blast	90.1	None
RGVC531	3300010262_15	d__Bacteria;p__Firmicutes_A;c__Clostridia;o__Oscillospirales;f__Oscillospiraceae;g__Dysosmobacter;s__	blast	91	iPHoP-RF;82.20
RGVC531	GB_GCA_000436875.1	d__Bacteria;p__Firmicutes_A;c__Clostridia;o__Oscillospirales;f__Oscillospiraceae;g__Dysosmobacter;s__Dysosmobacter sp000436875	blast	90.7	iPHoP-RF;79.50
RGVC531	GB_GCA_004558115.1	d__Bacteria;p__Firmicutes_A;c__Clostridia;o__Oscillospirales;f__Oscillospiraceae;g__Dysosmobacter;s__Dysosmobacter sp004558115	blast	93.7	iPHoP-RF;87.90
RGVC531	GB_GCA_900544615.1	d__Bacteria;p__Firmicutes_A;c__Clostridia;o__Oscillospirales;f__Oscillospiraceae;g__Dysosmobacter;s__Dysosmobacter sp900544615	blast	90.8	iPHoP-RF;76.40
RGVC531	GB_GCA_900548505.1	d__Bacteria;p__Firmicutes_A;c__Clostridia;o__Oscillospirales;f__Oscillospiraceae;g__Dysosmobacter;s__Dysosmobacter sp900548505	blast	90.7	iPHoP-RF;85.10
RGVC531	GB_GCA_900551885.1	d__Bacteria;p__Firmicutes_A;c__Clostridia;o__Oscillospirales;f__Oscillospiraceae;g__Dysosmobacter;s__Dysosmobacter sp900551885	blast	92.1	iPHoP-RF;88.90
RGVC531	RS_GCF_000403435.2	d__Bacteria;p__Firmicutes_A;c__Clostridia;o__Oscillospirales;f__Oscillospiraceae;g__Dysosmobacter;s__Dysosmobacter sp000403435	blast	90.9	iPHoP-RF;83.90
RGVC531	RS_GCF_005121165.1	d__Bacteria;p__Firmicutes_A;c__Clostridia;o__Oscillospirales;f__Oscillospiraceae;g__Dysosmobacter;s__Dysosmobacter welbionis	blast	90.8	iPHoP-RF;87.90
RGVC532	RS_GCF_000331005.1	d__Bacteria;p__Actinobacteriota;c__Actinomycetia;o__Streptomycetales;f__Streptomycetaceae;g__Streptomyces;s__Streptomyces turgidiscabies	blast	96.8	None
RGVC532	RS_GCF_001550375.1	d__Bacteria;p__Actinobacteriota;c__Actinomycetia;o__Streptomycetales;f__Streptomycetaceae;g__Streptomyces;s__Streptomyces europaeiscabiei	blast	96.9	None
RGVC532	RS_GCF_002910915.1	d__Bacteria;p__Actinobacteriota;c__Actinomycetia;o__Streptomycetales;f__Streptomycetaceae;g__Streptomyces;s__Streptomyces sp002910915	blast	96.9	None
RGVC532	RS_GCF_003121295.1	d__Bacteria;p__Actinobacteriota;c__Actinomycetia;o__Streptomycetales;f__Streptomycetaceae;g__Streptomyces;s__Streptomyces orinoci	blast	96.9	None
RGVC532	RS_GCF_007896895.1	d__Bacteria;p__Actinobacteriota;c__Actinomycetia;o__Streptomycetales;f__Streptomycetaceae;g__Streptomyces;s__Streptomyces misionensis_A	blast	96.8	None
RGVC532	RS_GCF_900626145.1	d__Bacteria;p__Firmicutes_A;c__Clostridia;o__Oscillospirales;f__Oscillospiraceae;g__Intestinimonas;s__Intestinimonas timonensis	blast	92	None
RGVC532	RS_GCF_900626285.1	d__Bacteria;p__Firmicutes_A;c__Clostridia;o__Oscillospirales;f__Oscillospiraceae;g__Flavonifractor;s__Flavonifractor massiliensis_A	blast	92.7	None
RGVC533	GB_GCA_902782915.1	d__Bacteria;p__Firmicutes;c__Bacilli;o__RF39;f__UBA660;g__RUG591;s__RUG591 sp902782915	blast	93.9	None
RGVC533	GB_GCA_902797275.1	d__Bacteria;p__Firmicutes;c__Bacilli;o__RF39;f__UBA660;g__RUG591;s__RUG591 sp902797275	blast	93.8	None
RGVC533	GB_GCA_900320425.1	d__Bacteria;p__Firmicutes;c__Bacilli;o__RF39;f__UBA660;g__RUG591;s__RUG591 sp900320425	blast	92.5	None
RGVC535	GB_GCA_900542395.1	d__Bacteria;p__Firmicutes_A;c__Clostridia_A;o__Christensenellales;f__CAG-74;g__SFFH01;s__SFFH01 sp900542395	blast	96.9	iPHoP-RF;64.00
RGVC535	GB_GCA_900542445.1	d__Bacteria;p__Firmicutes_A;c__Clostridia_A;o__Christensenellales;f__CAG-74;g__SFFH01;s__SFFH01 sp900542445	blast	96.9	iPHoP-RF;64.30
RGVC535	GB_GCA_004557905.1	d__Bacteria;p__Firmicutes_A;c__Clostridia_A;o__Christensenellales;f__CAG-74;g__SFFH01;s__SFFH01 sp004557905	blast	93.5	None
RGVC535	3300010278_24	d__Bacteria;p__Firmicutes_A;c__Clostridia_A;o__Christensenellales;f__CAG-74;g__SFFH01;s__	blast	90.2	iPHoP-RF;59.80
RGVC535	GB_GCA_900548125.1	d__Bacteria;p__Firmicutes_A;c__Clostridia_A;o__Christensenellales;f__CAG-74;g__SFFH01;s__SFFH01 sp900548125	blast	90.2	iPHoP-RF;59.50
RGVC537	GB_GCA_004557645.1	d__Bacteria;p__Firmicutes_A;c__Clostridia;o__Lachnospirales;f__Anaerotignaceae;g__Anaerotignum;s__Anaerotignum sp004557645	blast	92.8	iPHoP-RF;54.60
RGVC538	RS_GCF_000503775.1	d__Bacteria;p__Firmicutes;c__Bacilli;o__Brevibacillales;f__Brevibacillaceae;g__Brevibacillus;s__Brevibacillus panacihumi_A	iPHoP-RF	93.7	None
RGVC538	RS_GCF_013284355.1	d__Bacteria;p__Firmicutes;c__Bacilli;o__Brevibacillales;f__Brevibacillaceae;g__Brevibacillus;s__Brevibacillus sp013284355	iPHoP-RF	93.7	None
RGVC542	GB_GCA_900540045.1	d__Bacteria;p__Firmicutes_A;c__Clostridia_A;o__Christensenellales;f__CAG-74;g__Firm-11;s__Firm-11 sp900540045	blast	93.4	iPHoP-RF;71.70
RGVC543	GB_GCA_004557125.1	d__Bacteria;p__Firmicutes_A;c__Clostridia_A;o__Christensenellales;f__CAG-74;g__SFTH01;s__SFTH01 sp004557125	blast	90.7	None
RGVC544	3300005460_45	d__Bacteria;p__Bacteroidota;c__Bacteroidia;o__Bacteroidales;f__Rikenellaceae;g__Alistipes;s__	blast	92	None
RGVC544	3300012979_21	d__Bacteria;p__Bacteroidota;c__Bacteroidia;o__Bacteroidales;f__Rikenellaceae;g__Alistipes;s__	blast	91.7	None
RGVC544	3300012983_37	d__Bacteria;p__Bacteroidota;c__Bacteroidia;o__Bacteroidales;f__Rikenellaceae;g__Alistipes;s__	blast	91.4	None
RGVC544	3300022660_93	d__Bacteria;p__Bacteroidota;c__Bacteroidia;o__Bacteroidales;f__Rikenellaceae;g__Alistipes;s__	blast	91.7	None
RGVC544	3300029584_16	d__Bacteria;p__Bacteroidota;c__Bacteroidia;o__Bacteroidales;f__Rikenellaceae;g__Alistipes;s__	blast	92	None
RGVC544	GB_GCA_000434235.1	d__Bacteria;p__Bacteroidota;c__Bacteroidia;o__Bacteroidales;f__Rikenellaceae;g__Alistipes;s__Alistipes sp000434235	blast	91.9	iPHoP-RF;55.40
RGVC544	GB_GCA_001941065.1	d__Bacteria;p__Bacteroidota;c__Bacteroidia;o__Bacteroidales;f__Rikenellaceae;g__Alistipes;s__Alistipes sp001941065	blast	91.9	iPHoP-RF;60.10
RGVC544	GB_GCA_003979135.1	d__Bacteria;p__Bacteroidota;c__Bacteroidia;o__Bacteroidales;f__Rikenellaceae;g__Alistipes;s__Alistipes sp003979135	blast	92	None
RGVC544	GB_GCA_900541585.1	d__Bacteria;p__Bacteroidota;c__Bacteroidia;o__Bacteroidales;f__Rikenellaceae;g__Alistipes;s__Alistipes sp900541585	blast	91.9	iPHoP-RF;50.20
RGVC544	GB_GCA_900544265.1	d__Bacteria;p__Bacteroidota;c__Bacteroidia;o__Bacteroidales;f__Rikenellaceae;g__Alistipes;s__Alistipes sp900544265	blast	91.9	None
RGVC544	GB_GCA_900549305.1	d__Bacteria;p__Bacteroidota;c__Bacteroidia;o__Bacteroidales;f__Rikenellaceae;g__Alistipes;s__Alistipes sp900549305	blast	91.9	iPHoP-RF;59.50
RGVC544	GB_GCA_900552955.1	d__Bacteria;p__Bacteroidota;c__Bacteroidia;o__Bacteroidales;f__Rikenellaceae;g__Alistipes;s__Alistipes sp900552955	blast	91.8	None
RGVC544	GB_GCA_900553175.1	d__Bacteria;p__Bacteroidota;c__Bacteroidia;o__Bacteroidales;f__Rikenellaceae;g__Alistipes;s__Alistipes sp900553175	blast	91.9	None
RGVC544	GB_GCA_900760675.1	d__Bacteria;p__Bacteroidota;c__Bacteroidia;o__Bacteroidales;f__Rikenellaceae;g__Alistipes;s__Alistipes sp900760675	blast	92	None
RGVC544	GB_GCA_900769745.1	d__Bacteria;p__Bacteroidota;c__Bacteroidia;o__Bacteroidales;f__Rikenellaceae;g__Alistipes;s__Alistipes sp900769745	blast	91.8	None
RGVC544	GB_GCA_900770585.1	d__Bacteria;p__Bacteroidota;c__Bacteroidia;o__Bacteroidales;f__Rikenellaceae;g__Alistipes;s__Alistipes sp900770585	blast	91.4	None
RGVC544	GB_GCA_902388705.1	d__Bacteria;p__Bacteroidota;c__Bacteroidia;o__Bacteroidales;f__Rikenellaceae;g__Alistipes;s__Alistipes sp902388705	blast	91.9	iPHoP-RF;53.30
RGVC544	RS_GCF_000154465.1	d__Bacteria;p__Bacteroidota;c__Bacteroidia;o__Bacteroidales;f__Rikenellaceae;g__Alistipes;s__Alistipes putredinis	blast	92	None
RGVC544	RS_GCF_000210575.1	d__Bacteria;p__Bacteroidota;c__Bacteroidia;o__Bacteroidales;f__Rikenellaceae;g__Alistipes;s__Alistipes shahii	blast	91.9	iPHoP-RF;63.50
RGVC544	RS_GCF_000265365.1	d__Bacteria;p__Bacteroidota;c__Bacteroidia;o__Bacteroidales;f__Rikenellaceae;g__Alistipes;s__Alistipes finegoldii	blast	91.9	iPHoP-RF;70.00
RGVC544	RS_GCF_000312145.1	d__Bacteria;p__Bacteroidota;c__Bacteroidia;o__Bacteroidales;f__Rikenellaceae;g__Alistipes;s__Alistipes senegalensis	blast	91.9	iPHoP-RF;53.30
RGVC544	RS_GCF_000374505.1	d__Bacteria;p__Bacteroidota;c__Bacteroidia;o__Bacteroidales;f__Rikenellaceae;g__Alistipes;s__Alistipes onderdonkii	blast	91.9	iPHoP-RF;70.60
RGVC544	RS_GCF_002161445.1	d__Bacteria;p__Bacteroidota;c__Bacteroidia;o__Bacteroidales;f__Rikenellaceae;g__Alistipes;s__Alistipes sp002161445	blast	91.9	None
RGVC544	RS_GCF_006542665.1	d__Bacteria;p__Bacteroidota;c__Bacteroidia;o__Bacteroidales;f__Rikenellaceae;g__Alistipes;s__Alistipes communis	blast	91.8	None
RGVC544	RS_GCF_006542685.1	d__Bacteria;p__Bacteroidota;c__Bacteroidia;o__Bacteroidales;f__Rikenellaceae;g__Alistipes;s__Alistipes dispar	blast	91.9	None
RGVC544	RS_GCF_900021155.1	d__Bacteria;p__Bacteroidota;c__Bacteroidia;o__Bacteroidales;f__Rikenellaceae;g__Alistipes;s__Alistipes sp900021155	blast	91.9	None
RGVC544	RS_GCF_900083545.1	d__Bacteria;p__Bacteroidota;c__Bacteroidia;o__Bacteroidales;f__Rikenellaceae;g__Alistipes;s__Alistipes provencensis	blast	91.9	iPHoP-RF;53.30
RGVC544	RS_GCF_900107675.1	d__Bacteria;p__Bacteroidota;c__Bacteroidia;o__Bacteroidales;f__Rikenellaceae;g__Alistipes;s__Alistipes timonensis	blast	91.9	iPHoP-RF;58.40
RGVC544	RS_GCF_900290115.1	d__Bacteria;p__Bacteroidota;c__Bacteroidia;o__Bacteroidales;f__Rikenellaceae;g__Alistipes;s__Alistipes sp900290115	blast	93.6	None
RGVC544	RS_GCF_900604385.1	d__Bacteria;p__Bacteroidota;c__Bacteroidia;o__Bacteroidales;f__Rikenellaceae;g__Alistipes;s__Alistipes megaguti	blast	91.9	None
RGVC544	RS_GCF_902362705.1	d__Bacteria;p__Bacteroidota;c__Bacteroidia;o__Bacteroidales;f__Rikenellaceae;g__Alistipes;s__Alistipes sp002358415	blast	91.9	iPHoP-RF;55.20
RGVC547	RS_GCF_000526775.1	d__Bacteria;p__Firmicutes_A;c__Clostridia;o__Oscillospirales;f__Ruminococcaceae;g__Ruminococcus_D;s__Ruminococcus_D albus_A	blast	91.8	None
RGVC547	RS_GCF_000723465.1	d__Bacteria;p__Firmicutes_A;c__Clostridia;o__Oscillospirales;f__Ruminococcaceae;g__Ruminococcus_D;s__Ruminococcus_D bicirculans	blast	92.8	iPHoP-RF;73.50
RGVC547	RS_GCF_900112155.1	d__Bacteria;p__Firmicutes_A;c__Clostridia;o__Oscillospirales;f__Ruminococcaceae;g__Ruminococcus_D;s__Ruminococcus_D albus_D	blast	91.5	None
RGVC548	3300018475_123	d__Bacteria;p__Firmicutes_A;c__Clostridia;o__Oscillospirales;f__Ruminococcaceae;g__;s__	blast	92.7	iPHoP-RF;63.50
RGVC550	3300018878_209	d__Bacteria;p__Bacteroidota;c__Bacteroidia;o__Bacteroidales;f__Rikenellaceae;g__Alistipes;s__	blast	93.3	iPHoP-RF;69.50
RGVC550	RS_GCF_000265365.1	d__Bacteria;p__Bacteroidota;c__Bacteroidia;o__Bacteroidales;f__Rikenellaceae;g__Alistipes;s__Alistipes finegoldii	blast	91	None
RGVC552	GB_GCA_900540045.1	d__Bacteria;p__Firmicutes_A;c__Clostridia_A;o__Christensenellales;f__CAG-74;g__Firm-11;s__Firm-11 sp900540045	blast	96.1	None
RGVC553	3300010275_16	d__Bacteria;p__Firmicutes_A;c__Clostridia;o__Lachnospirales;f__Lachnospiraceae;g__Acetatifactor;s__	blast	92.5	iPHoP-RF;74.60
RGVC554	3300018430_42	d__Bacteria;p__Firmicutes_A;c__Clostridia_A;o__Christensenellales;f__CAG-74;g__;s__	blast	92.1	None
RGVC554	GB_GCA_004554085.1	d__Bacteria;p__Firmicutes_A;c__Clostridia_A;o__Christensenellales;f__CAG-74;g__SFTH01;s__SFTH01 sp004554085	blast	92.1	None
RGVC554	GB_GCA_004555155.1	d__Bacteria;p__Firmicutes_A;c__Clostridia_A;o__Christensenellales;f__CAG-74;g__UMGS1603;s__UMGS1603 sp004555155	blast	92.5	None
RGVC554	GB_GCA_004557125.1	d__Bacteria;p__Firmicutes_A;c__Clostridia_A;o__Christensenellales;f__CAG-74;g__SFTH01;s__SFTH01 sp004557125	blast	92.5	None
RGVC554	GB_GCA_004563405.1	d__Bacteria;p__Firmicutes_A;c__Clostridia_A;o__Christensenellales;f__CAG-74;g__SFTH01;s__SFTH01 sp004563405	blast	93.1	None
RGVC554	GB_GCA_900315585.1	d__Bacteria;p__Firmicutes_A;c__Clostridia_A;o__Christensenellales;f__CAG-74;g__UBA2862;s__UBA2862 sp900315585	blast	91.9	None
RGVC554	GB_GCA_900317565.1	d__Bacteria;p__Firmicutes_A;c__Clostridia_A;o__Christensenellales;f__CAG-74;g__UBA2862;s__UBA2862 sp900317565	blast	91.7	None
RGVC554	GB_GCA_900318045.1	d__Bacteria;p__Firmicutes_A;c__Clostridia_A;o__Christensenellales;f__CAG-74;g__UBA2862;s__UBA2862 sp900318045	blast	90	None
RGVC554	GB_GCA_900553265.1	d__Bacteria;p__Firmicutes_A;c__Clostridia_A;o__Christensenellales;f__CAG-74;g__UMGS1603;s__UMGS1603 sp900553265	blast	92.5	None
RGVC554	GB_GCA_902764285.1	d__Bacteria;p__Firmicutes_A;c__Clostridia_A;o__Christensenellales;f__CAG-74;g__UBA2862;s__UBA2862 sp902764285	blast	91.7	None
RGVC554	GB_GCA_902765305.1	d__Bacteria;p__Firmicutes_A;c__Clostridia_A;o__Christensenellales;f__CAG-74;g__UBA2862;s__UBA2862 sp902765305	blast	91.7	None
RGVC554	GB_GCA_902765395.1	d__Bacteria;p__Firmicutes_A;c__Clostridia_A;o__Christensenellales;f__CAG-74;g__UBA2862;s__UBA2862 sp902765395	blast	91.9	None
RGVC554	GB_GCA_902765735.1	d__Bacteria;p__Firmicutes_A;c__Clostridia_A;o__Christensenellales;f__CAG-74;g__UBA2862;s__UBA2862 sp002350605	blast	91.7	None
RGVC554	GB_GCA_902773515.1	d__Bacteria;p__Firmicutes_A;c__Clostridia_A;o__Christensenellales;f__CAG-74;g__UBA2862;s__UBA2862 sp902773515	blast	91.7	None
RGVC554	GB_GCA_902777335.1	d__Bacteria;p__Firmicutes_A;c__Clostridia_A;o__Christensenellales;f__CAG-74;g__UBA2862;s__UBA2862 sp902777335	blast	91.7	None
RGVC554	GB_GCA_902778045.1	d__Bacteria;p__Firmicutes_A;c__Clostridia_A;o__Christensenellales;f__CAG-74;g__UBA2862;s__UBA2862 sp902778045	blast	91.7	None
RGVC554	GB_GCA_902778995.1	d__Bacteria;p__Firmicutes_A;c__Clostridia_A;o__Christensenellales;f__CAG-74;g__UBA2862;s__UBA2862 sp902778995	blast	91.9	None
RGVC554	GB_GCA_902785105.1	d__Bacteria;p__Firmicutes_A;c__Clostridia_A;o__Christensenellales;f__CAG-74;g__UBA2862;s__UBA2862 sp902785105	blast	91.8	None
RGVC554	GB_GCA_902790175.1	d__Bacteria;p__Firmicutes_A;c__Clostridia_A;o__Christensenellales;f__CAG-74;g__UBA2862;s__UBA2862 sp902790175	blast	91.7	None
RGVC554	GB_GCA_902790525.1	d__Bacteria;p__Firmicutes_A;c__Clostridia_A;o__Christensenellales;f__CAG-74;g__UBA2862;s__UBA2862 sp902790525	blast	91.8	None
RGVC554	GB_GCA_902793325.1	d__Bacteria;p__Firmicutes_A;c__Clostridia_A;o__Christensenellales;f__CAG-74;g__UBA2862;s__UBA2862 sp902793325	blast	91.8	None
RGVC554	GB_GCA_902798105.1	d__Bacteria;p__Firmicutes_A;c__Clostridia_A;o__Christensenellales;f__CAG-74;g__UBA2862;s__UBA2862 sp902798105	blast	91.9	None
RGVC554	GB_GCA_902799045.1	d__Bacteria;p__Firmicutes_A;c__Clostridia_A;o__Christensenellales;f__CAG-74;g__UBA2862;s__UBA2862 sp902799045	blast	91.9	None
RGVC554	GB_GCA_902799465.1	d__Bacteria;p__Firmicutes_A;c__Clostridia_A;o__Christensenellales;f__CAG-74;g__UBA2862;s__UBA2862 sp902799465	blast	91.8	None
RGVC554	GB_GCA_902800625.1	d__Bacteria;p__Firmicutes_A;c__Clostridia_A;o__Christensenellales;f__CAG-74;g__UBA2862;s__UBA2862 sp902800625	blast	91.9	None
RGVC554	GB_GCA_902801165.1	d__Bacteria;p__Firmicutes_A;c__Clostridia_A;o__Christensenellales;f__CAG-74;g__UBA2862;s__UBA2862 sp902801165	blast	93	None
RGVC554	RS_GCF_900759005.1	d__Bacteria;p__Firmicutes_A;c__Clostridia_A;o__Christensenellales;f__CAG-74;g__UMGS1603;s__UMGS1603 sp900759005	blast	92.1	None
RGVC555	GB_GCA_900546315.1	d__Bacteria;p__Firmicutes_A;c__Clostridia;o__Oscillospirales;f__CAG-272;g__UMGS874;s__UMGS874 sp900546315	blast	96.9	iPHoP-RF;67.00
RGVC556	GB_GCA_902797885.1	d__Bacteria;p__Firmicutes_A;c__Clostridia;o__Monoglobales;f__Monoglobaceae;g__UMGS1820;s__UMGS1820 sp902797885	blast	90.8	None
RGVC557	RS_GCF_900769695.1	d__Bacteria;p__Firmicutes;c__Bacilli;o__RF39;f__UBA660;g__UMGS995;s__UMGS995 sp900769695	blast	92.1	None
RGVC557	RS_GCF_900768815.1	d__Bacteria;p__Firmicutes;c__Bacilli;o__RF39;f__UBA660;g__CAG-877;s__CAG-877 sp900768815	blast	90.8	None
RGVC557	GB_GCA_000433455.1	d__Bacteria;p__Firmicutes;c__Bacilli;o__RF39;f__UBA660;g__CAG-877;s__CAG-877 sp000433455	blast	90.2	None
RGVC558	GB_GCA_003018335.1	d__Bacteria;p__Proteobacteria;c__Gammaproteobacteria;o__Enterobacterales;f__Enterobacteriaceae;g__Escherichia;s__Escherichia coli_C	iPHoP-RF	92.8	None
RGVC558	RS_GCF_000026225.1	d__Bacteria;p__Proteobacteria;c__Gammaproteobacteria;o__Enterobacterales;f__Enterobacteriaceae;g__Escherichia;s__Escherichia fergusonii	blast	97.6	iPHoP-RF;94.10
RGVC558	RS_GCF_000026325.1	d__Bacteria;p__Proteobacteria;c__Gammaproteobacteria;o__Enterobacterales;f__Enterobacteriaceae;g__Escherichia;s__Escherichia coli_D	blast	97.6	iPHoP-RF;94.40
RGVC558	RS_GCF_000208585.1	d__Bacteria;p__Proteobacteria;c__Gammaproteobacteria;o__Enterobacterales;f__Enterobacteriaceae;g__Escherichia;s__Escherichia sp000208585	blast	97.6	iPHoP-RF;94.70
RGVC558	RS_GCF_000759775.1	d__Bacteria;p__Proteobacteria;c__Gammaproteobacteria;o__Enterobacterales;f__Enterobacteriaceae;g__Escherichia;s__Escherichia albertii	blast	96.9	iPHoP-RF;91.10
RGVC558	RS_GCF_001660175.1	d__Bacteria;p__Proteobacteria;c__Gammaproteobacteria;o__Enterobacterales;f__Enterobacteriaceae;g__Escherichia;s__Escherichia sp001660175	blast	97.6	iPHoP-RF;95.10
RGVC558	RS_GCF_002900365.1	d__Bacteria;p__Proteobacteria;c__Gammaproteobacteria;o__Enterobacterales;f__Enterobacteriaceae;g__Escherichia;s__Escherichia marmotae	blast	97.6	iPHoP-RF;94.70
RGVC558	RS_GCF_002949675.1	d__Bacteria;p__Proteobacteria;c__Gammaproteobacteria;o__Enterobacterales;f__Enterobacteriaceae;g__Escherichia;s__Escherichia dysenteriae	blast	97.6	iPHoP-RF;95.10
RGVC558	RS_GCF_002950215.1	d__Bacteria;p__Proteobacteria;c__Gammaproteobacteria;o__Enterobacterales;f__Enterobacteriaceae;g__Escherichia;s__Escherichia flexneri	blast	97.6	iPHoP-RF;94.70
RGVC558	RS_GCF_002965065.1	d__Bacteria;p__Proteobacteria;c__Gammaproteobacteria;o__Enterobacterales;f__Enterobacteriaceae;g__Escherichia;s__Escherichia sp002965065	iPHoP-RF	95.1	None
RGVC558	RS_GCF_003697165.2	d__Bacteria;p__Proteobacteria;c__Gammaproteobacteria;o__Enterobacterales;f__Enterobacteriaceae;g__Escherichia;s__Escherichia coli	blast	98.6	iPHoP-RF;95.10
RGVC558	RS_GCF_005843885.1	d__Bacteria;p__Proteobacteria;c__Gammaproteobacteria;o__Enterobacterales;f__Enterobacteriaceae;g__Escherichia;s__Escherichia sp005843885	iPHoP-RF	94.7	None
RGVC559	RS_GCF_004154955.1	d__Bacteria;p__Firmicutes_A;c__Clostridia;o__Oscillospirales;f__Oscillospiraceae;g__Intestinimonas;s__Intestinimonas butyriciproducens	blast	94.5	iPHoP-RF;80.30
RGVC559	RS_GCF_014287675.1	d__Bacteria;p__Firmicutes_A;c__Clostridia;o__Oscillospirales;f__Oscillospiraceae;g__Pseudoflavonifractor;s__Pseudoflavonifractor sp014287675	blast	91	iPHoP-RF;68.20
RGVC563	RS_GCF_000190535.1	d__Bacteria;p__Bacteroidota;c__Bacteroidia;o__Bacteroidales;f__Marinifilaceae;g__Odoribacter;s__Odoribacter splanchnicus	blast	96.9	None
RGVC565	GB_GCA_900547105.1	d__Bacteria;p__Firmicutes_A;c__Clostridia;o__Oscillospirales;f__Acutalibacteraceae;g__UMGS1474;s__UMGS1474 sp900547105	blast	92.7	iPHoP-RF;72.40
RGVC565	RS_GCF_002161595.1	d__Bacteria;p__Firmicutes_A;c__Clostridia;o__Oscillospirales;f__Ruminococcaceae;g__Fournierella;s__Fournierella sp002161595	blast	92.3	iPHoP-RF;61.70
RGVC565	RS_GCF_004345265.1	d__Bacteria;p__Firmicutes_A;c__Clostridia;o__Oscillospirales;f__Ruminococcaceae;g__Fournierella;s__Fournierella massiliensis	blast	91.9	iPHoP-RF;60.90
RGVC567	3300018475_121	d__Bacteria;p__Firmicutes_A;c__Clostridia;o__Oscillospirales;f__Ruminococcaceae;g__UBA7477;s__	blast	90	None
RGVC568	GB_GCA_000210075.1	d__Bacteria;p__Bacteroidota;c__Bacteroidia;o__Bacteroidales;f__Bacteroidaceae;g__Bacteroides;s__Bacteroides xylanisolvens	iPHoP-RF	97.1	blast;92.00
RGVC568	GB_GCA_014385165.1	d__Bacteria;p__Bacteroidota;c__Bacteroidia;o__Bacteroidales;f__Bacteroidaceae;g__Bacteroides;s__Bacteroides sp014385165	iPHoP-RF	96.1	None
RGVC568	GB_GCA_900552405.1	d__Bacteria;p__Bacteroidota;c__Bacteroidia;o__Bacteroidales;f__Bacteroidaceae;g__Bacteroides;s__Bacteroides sp900552405	iPHoP-RF	96.1	None
RGVC568	GB_GCA_900557355.1	d__Bacteria;p__Bacteroidota;c__Bacteroidia;o__Bacteroidales;f__Bacteroidaceae;g__Bacteroides;s__Bacteroides sp900557355	iPHoP-RF	95.7	None
RGVC568	GB_GCA_900755095.1	d__Bacteria;p__Bacteroidota;c__Bacteroidia;o__Bacteroidales;f__Bacteroidaceae;g__Bacteroides;s__Bacteroides sp900755095	iPHoP-RF	97.1	None
RGVC568	GB_GCA_900761785.1	d__Bacteria;p__Bacteroidota;c__Bacteroidia;o__Bacteroidales;f__Bacteroidaceae;g__Bacteroides;s__Bacteroides sp900761785	iPHoP-RF	95.4	None
RGVC568	GB_GCA_900765805.1	d__Bacteria;p__Bacteroidota;c__Bacteroidia;o__Bacteroidales;f__Bacteroidaceae;g__Bacteroides;s__Bacteroides sp900765805	iPHoP-RF	94.7	None
RGVC568	GB_GCA_902388365.1	d__Bacteria;p__Bacteroidota;c__Bacteroidia;o__Bacteroidales;f__Bacteroidaceae;g__Phocaeicola;s__Phocaeicola sp902388365	blast	92.6	iPHoP-RF;82.80
RGVC568	RS_GCF_000011065.1	d__Bacteria;p__Bacteroidota;c__Bacteroidia;o__Bacteroidales;f__Bacteroidaceae;g__Bacteroides;s__Bacteroides thetaiotaomicron	iPHoP-RF	96.1	blast;92.60
RGVC568	RS_GCF_000012825.1	d__Bacteria;p__Bacteroidota;c__Bacteroidia;o__Bacteroidales;f__Bacteroidaceae;g__Phocaeicola;s__Phocaeicola vulgatus	blast	96.9	iPHoP-RF;90.10
RGVC568	RS_GCF_000156195.1	d__Bacteria;p__Bacteroidota;c__Bacteroidia;o__Bacteroidales;f__Bacteroidaceae;g__Bacteroides;s__Bacteroides finegoldii	iPHoP-RF	95.7	None
RGVC568	RS_GCF_000158035.1	d__Bacteria;p__Bacteroidota;c__Bacteroidia;o__Bacteroidales;f__Bacteroidaceae;g__Bacteroides;s__Bacteroides cellulosilyticus	iPHoP-RF	96.7	None
RGVC568	RS_GCF_000172175.1	d__Bacteria;p__Bacteroidota;c__Bacteroidia;o__Bacteroidales;f__Bacteroidaceae;g__Bacteroides;s__Bacteroides intestinalis	iPHoP-RF	96.4	None
RGVC568	RS_GCF_000195635.1	d__Bacteria;p__Bacteroidota;c__Bacteroidia;o__Bacteroidales;f__Bacteroidaceae;g__Bacteroides;s__Bacteroides fluxus	iPHoP-RF	90.8	None
RGVC568	RS_GCF_000315485.1	d__Bacteria;p__Bacteroidota;c__Bacteroidia;o__Bacteroidales;f__Bacteroidaceae;g__Bacteroides;s__Bacteroides oleiciplenus	iPHoP-RF	96.7	None
RGVC568	RS_GCF_000381365.1	d__Bacteria;p__Bacteroidota;c__Bacteroidia;o__Bacteroidales;f__Bacteroidaceae;g__Bacteroides;s__Bacteroides salyersiae	iPHoP-RF	95.7	None
RGVC568	RS_GCF_000513195.1	d__Bacteria;p__Bacteroidota;c__Bacteroidia;o__Bacteroidales;f__Bacteroidaceae;g__Bacteroides;s__Bacteroides timonensis	iPHoP-RF	96.4	None
RGVC568	RS_GCF_000613385.1	d__Bacteria;p__Bacteroidota;c__Bacteroidia;o__Bacteroidales;f__Bacteroidaceae;g__Bacteroides;s__Bacteroides acidifaciens	iPHoP-RF	97.1	None
RGVC568	RS_GCF_000614145.1	d__Bacteria;p__Bacteroidota;c__Bacteroidia;o__Bacteroidales;f__Bacteroidaceae;g__Bacteroides;s__Bacteroides faecichinchillae	iPHoP-RF	96.4	blast;91.70
RGVC568	RS_GCF_000614165.1	d__Bacteria;p__Bacteroidota;c__Bacteroidia;o__Bacteroidales;f__Bacteroidaceae;g__Bacteroides;s__Bacteroides stercorirosoris	iPHoP-RF	96.7	None
RGVC568	RS_GCF_000614185.1	d__Bacteria;p__Bacteroidota;c__Bacteroidia;o__Bacteroidales;f__Bacteroidaceae;g__Phocaeicola;s__Phocaeicola sartorii	blast	96.6	iPHoP-RF;83.60
RGVC568	RS_GCF_001314995.1	d__Bacteria;p__Bacteroidota;c__Bacteroidia;o__Bacteroidales;f__Bacteroidaceae;g__Bacteroides;s__Bacteroides ovatus	iPHoP-RF	97.1	None
RGVC568	RS_GCF_001688725.2	d__Bacteria;p__Bacteroidota;c__Bacteroidia;o__Bacteroidales;f__Bacteroidaceae;g__Bacteroides;s__Bacteroides caecimuris	iPHoP-RF	97.1	None
RGVC568	RS_GCF_002222615.2	d__Bacteria;p__Bacteroidota;c__Bacteroidia;o__Bacteroidales;f__Bacteroidaceae;g__Bacteroides;s__Bacteroides caccae	iPHoP-RF	97.1	blast;91.30
RGVC568	RS_GCF_003464595.1	d__Bacteria;p__Bacteroidota;c__Bacteroidia;o__Bacteroidales;f__Bacteroidaceae;g__Bacteroides;s__Bacteroides intestinalis_A	iPHoP-RF	96.1	None
RGVC568	RS_GCF_003865075.1	d__Bacteria;p__Bacteroidota;c__Bacteroidia;o__Bacteroidales;f__Bacteroidaceae;g__Bacteroides;s__Bacteroides sp003865075	iPHoP-RF	96.1	None
RGVC568	RS_GCF_009193295.2	d__Bacteria;p__Bacteroidota;c__Bacteroidia;o__Bacteroidales;f__Bacteroidaceae;g__Bacteroides;s__Bacteroides sp007097645	iPHoP-RF	97.1	None
RGVC568	RS_GCF_009193325.2	d__Bacteria;p__Bacteroidota;c__Bacteroidia;o__Bacteroidales;f__Bacteroidaceae;g__Bacteroides;s__Bacteroides sp900066265	iPHoP-RF	96.7	None
RGVC568	RS_GCF_011959205.1	d__Bacteria;p__Bacteroidota;c__Bacteroidia;o__Bacteroidales;f__Bacteroidaceae;g__Phocaeicola;s__Phocaeicola sp011959205	blast	96.8	iPHoP-RF;88.50
RGVC568	RS_GCF_013009555.1	d__Bacteria;p__Bacteroidota;c__Bacteroidia;o__Bacteroidales;f__Bacteroidaceae;g__Phocaeicola;s__Phocaeicola dorei	blast	96.9	iPHoP-RF;85.70
RGVC568	RS_GCF_014334015.1	d__Bacteria;p__Bacteroidota;c__Bacteroidia;o__Bacteroidales;f__Bacteroidaceae;g__Bacteroides;s__Bacteroides sp003463205	iPHoP-RF	97.1	None
RGVC568	RS_GCF_900106755.1	d__Bacteria;p__Bacteroidota;c__Bacteroidia;o__Bacteroidales;f__Bacteroidaceae;g__Bacteroides;s__Bacteroides faecis	iPHoP-RF	95.4	None
RGVC568	RS_GCF_900155865.1	d__Bacteria;p__Bacteroidota;c__Bacteroidia;o__Bacteroidales;f__Bacteroidaceae;g__Bacteroides;s__Bacteroides bouchesdurhonensis	iPHoP-RF	97.1	None
RGVC568	RS_GCF_900760795.1	d__Bacteria;p__Bacteroidota;c__Bacteroidia;o__Bacteroidales;f__Bacteroidaceae;g__Phocaeicola;s__Phocaeicola sp900760795	iPHoP-RF	96.4	None
RGVC568	RS_GCF_902362375.1	d__Bacteria;p__Bacteroidota;c__Bacteroidia;o__Bacteroidales;f__Bacteroidaceae;g__Bacteroides;s__Bacteroides sp902362375	iPHoP-RF	97.1	None
RGVC568	RS_GCF_902364365.1	d__Bacteria;p__Bacteroidota;c__Bacteroidia;o__Bacteroidales;f__Bacteroidaceae;g__Bacteroides;s__Bacteroides sp900556215	iPHoP-RF	96.1	None
RGVC570	GB_GCA_900556925.1	d__Bacteria;p__Firmicutes_A;c__Clostridia;o__Oscillospirales;f__Oscillospiraceae;g__Dysosmobacter;s__Dysosmobacter sp900556925	iPHoP-RF	90.8	None
RGVC570	GB_GCA_900770295.1	d__Bacteria;p__Firmicutes_A;c__Clostridia;o__Oscillospirales;f__Oscillospiraceae;g__Dysosmobacter;s__Dysosmobacter sp900770295	blast	92	iPHoP-RF;80.60
RGVC570	RS_GCF_005121165.1	d__Bacteria;p__Firmicutes_A;c__Clostridia;o__Oscillospirales;f__Oscillospiraceae;g__Dysosmobacter;s__Dysosmobacter welbionis	iPHoP-RF	94.1	blast;91.00
RGVC571	GB_GCA_002436765.1	d__Bacteria;p__Firmicutes_A;c__Clostridia;o__Oscillospirales;f__Oscillospiraceae;g__CAG-110;s__CAG-110 sp002436765	blast	90.9	iPHoP-RF;77.50
RGVC572	3300018427_70	d__Bacteria;p__Firmicutes_A;c__Clostridia;o__Oscillospirales;f__Ruminococcaceae;g__;s__	blast	93.6	None
RGVC574	3300026522_23	d__Bacteria;p__Firmicutes_A;c__Clostridia;o__Monoglobales_A;f__UBA1381;g__;s__	blast	91.3	None
RGVC575	GB_GCA_900542735.1	d__Bacteria;p__Firmicutes;c__Bacilli;o__RF39;f__UBA660;g__UBA7057;s__UBA7057 sp900542735	blast	90.5	None
RGVC576	GB_GCA_004562765.1	d__Bacteria;p__Firmicutes_A;c__Clostridia;o__Lachnospirales;f__Lachnospiraceae;g__Eubacterium_J;s__Eubacterium_J sp004562765	blast	91.6	None
RGVC576	GB_GCA_008661915.1	d__Bacteria;p__Firmicutes_A;c__Clostridia;o__Lachnospirales;f__Lachnospiraceae;g__Blautia_A;s__Blautia_A wexlerae_A	blast	91.9	iPHoP-RF;70.40
RGVC576	RS_GCF_000484655.1	d__Bacteria;p__Firmicutes_A;c__Clostridia;o__Lachnospirales;f__Lachnospiraceae;g__Blautia_A;s__Blautia_A wexlerae	blast	92.5	iPHoP-RF;67.00
RGVC578	RS_GCF_900757255.1	d__Bacteria;p__Firmicutes_A;c__Clostridia;o__HGM11514;f__HGM11514;g__HGM11514;s__HGM11514 sp900757255	blast	94.8	iPHoP-RF;65.80
RGVC579	3300018475_171	d__Bacteria;p__Firmicutes_A;c__Clostridia;o__Oscillospirales;f__CAG-272;g__Firm-07;s__	blast	91.9	None
RGVC579	GB_GCA_900548735.1	d__Bacteria;p__Firmicutes_A;c__Clostridia;o__Oscillospirales;f__CAG-272;g__Firm-07;s__Firm-07 sp900548735	blast	91.3	None
RGVC580	GB_GCA_004557075.1	d__Bacteria;p__Firmicutes_A;c__Clostridia;o__Oscillospirales;f__Oscillospiraceae;g__F23-B02;s__F23-B02 sp004557075	blast	90.5	None
RGVC580	GB_GCA_902388735.1	d__Bacteria;p__Firmicutes_A;c__Clostridia;o__Oscillospirales;f__Oscillospiraceae;g__CAG-83;s__CAG-83 sp902388735	blast	92.3	iPHoP-RF;62.20
RGVC581	GB_GCA_000434035.1	d__Bacteria;p__Firmicutes_A;c__Clostridia;o__TANB77;f__CAG-508;g__CAG-452;s__CAG-452 sp000434035	blast	93.4	iPHoP-RF;63.50
RGVC582	3300026522_23	d__Bacteria;p__Firmicutes_A;c__Clostridia;o__Monoglobales_A;f__UBA1381;g__;s__	blast	93	None
RGVC582	RS_GCF_003460745.1	d__Bacteria;p__Firmicutes_A;c__Clostridia;o__Monoglobales_A;f__UBA1381;g__CAG-41;s__CAG-41 sp900066215	blast	91.4	None
RGVC582	GB_GCA_002438865.1	d__Bacteria;p__Firmicutes_A;c__Clostridia;o__Monoglobales_A;f__UBA1381;g__UBA4716;s__UBA4716 sp002438865	blast	90	iPHoP-RF;56.00
RGVC585	3300022753_111	d__Bacteria;p__Bacteroidota;c__Bacteroidia;o__Bacteroidales;f__Rikenellaceae;g__Alistipes;s__	blast	96.4	iPHoP-RF;72.20
RGVC585	RS_GCF_000154205.1	d__Bacteria;p__Bacteroidota;c__Bacteroidia;o__Bacteroidales;f__Bacteroidaceae;g__Bacteroides;s__Bacteroides uniformis	blast	95.5	None
RGVC585	GB_GCA_900770635.1	d__Bacteria;p__Bacteroidota;c__Bacteroidia;o__Bacteroidales;f__Rikenellaceae;g__Alistipes;s__Alistipes sp900770635	blast	95.2	iPHoP-RF;61.40
RGVC585	GB_GCA_900768045.1	d__Bacteria;p__Bacteroidota;c__Bacteroidia;o__Bacteroidales;f__Rikenellaceae;g__Alistipes;s__Alistipes sp900768045	blast	94.7	iPHoP-RF;59.20
RGVC586	3300022753_56	d__Bacteria;p__Firmicutes_A;c__Clostridia;o__Oscillospirales;f__Oscillospiraceae;g__;s__	blast	90.6	iPHoP-RF;81.40
RGVC587	GB_GCA_902797995.1	d__Bacteria;p__Firmicutes;c__Bacilli;o__RF39;f__UBA660;g__UMGS1449;s__UMGS1449 sp902797995	blast	91	None
RGVC588	GB_GCA_000435715.1	d__Bacteria;p__Firmicutes_A;c__Clostridia;o__Peptostreptococcales;f__Anaerovoracaceae;g__CAG-145;s__CAG-145 sp000435715	blast	91	None
RGVC588	GB_GCA_002320005.1	d__Bacteria;p__Firmicutes_A;c__Clostridia;o__Peptostreptococcales;f__Anaerovoracaceae;g__CAG-145;s__CAG-145 sp002320005	blast	92.7	None
RGVC588	GB_GCA_003150015.1	d__Bacteria;p__Firmicutes_A;c__Clostridia;o__Peptostreptococcales;f__Anaerovoracaceae;g__CAG-145;s__CAG-145 sp003150015	blast	92	None
RGVC588	GB_GCA_900542295.1	d__Bacteria;p__Firmicutes_A;c__Clostridia;o__Peptostreptococcales;f__Anaerovoracaceae;g__CAG-145;s__CAG-145 sp900542295	blast	92.1	None
RGVC589	3300027276_17	d__Bacteria;p__Firmicutes_A;c__Clostridia_A;o__Christensenellales;f__CAG-74;g__Firm-10;s__	blast	91.9	None
RGVC589	GB_GCA_001603025.1	d__Bacteria;p__Firmicutes_A;c__Clostridia_A;o__Christensenellales;f__CAG-74;g__Firm-10;s__Firm-10 sp001603025	blast	92.1	None
RGVC589	GB_GCA_004552515.1	d__Bacteria;p__Firmicutes_A;c__Clostridia_A;o__Christensenellales;f__CAG-74;g__Firm-10;s__Firm-10 sp004552515	blast	91.8	None
RGVC589	GB_GCA_902790345.1	d__Bacteria;p__Firmicutes_A;c__Clostridia_A;o__Christensenellales;f__CAG-74;g__Firm-10;s__Firm-10 sp902790345	blast	92	None
RGVC590	3300022377_6	d__Bacteria;p__Bacteroidota;c__Bacteroidia;o__Bacteroidales;f__Bacteroidaceae;g__Phocaeicola;s__	blast	92.1	None
RGVC590	GB_GCA_000434735.1	d__Bacteria;p__Bacteroidota;c__Bacteroidia;o__Bacteroidales;f__Bacteroidaceae;g__Phocaeicola;s__Phocaeicola sp000434735	blast	92	None
RGVC590	GB_GCA_002493165.1	d__Bacteria;p__Bacteroidota;c__Bacteroidia;o__Bacteroidales;f__Bacteroidaceae;g__Phocaeicola;s__Phocaeicola sp002493165	blast	92	iPHoP-RF;72.80
RGVC590	GB_GCA_003489705.1	d__Bacteria;p__Bacteroidota;c__Bacteroidia;o__Bacteroidales;f__Bacteroidaceae;g__CAG-462;s__CAG-462 sp003489705	blast	91.9	iPHoP-RF;56.50
RGVC590	GB_GCA_004558305.1	d__Bacteria;p__Bacteroidota;c__Bacteroidia;o__Bacteroidales;f__Bacteroidaceae;g__Phocaeicola;s__Phocaeicola plebeius_B	blast	92.1	None
RGVC590	GB_GCA_900540105.1	d__Bacteria;p__Bacteroidota;c__Bacteroidia;o__Bacteroidales;f__Bacteroidaceae;g__Phocaeicola;s__Phocaeicola sp900540105	blast	90.7	None
RGVC590	GB_GCA_900544675.1	d__Bacteria;p__Bacteroidota;c__Bacteroidia;o__Bacteroidales;f__Bacteroidaceae;g__Phocaeicola;s__Phocaeicola sp900544675	blast	92.1	None
RGVC590	GB_GCA_900546355.1	d__Bacteria;p__Bacteroidota;c__Bacteroidia;o__Bacteroidales;f__Bacteroidaceae;g__Phocaeicola;s__Phocaeicola sp900546355	blast	92.1	None
RGVC590	GB_GCA_900546645.1	d__Bacteria;p__Bacteroidota;c__Bacteroidia;o__Bacteroidales;f__Bacteroidaceae;g__Phocaeicola;s__Phocaeicola sp900546645	blast	90.7	iPHoP-RF;56.80
RGVC590	GB_GCA_900551065.1	d__Bacteria;p__Bacteroidota;c__Bacteroidia;o__Bacteroidales;f__Bacteroidaceae;g__Phocaeicola;s__Phocaeicola sp900551065	blast	91	iPHoP-RF;66.80
RGVC590	GB_GCA_900551445.1	d__Bacteria;p__Bacteroidota;c__Bacteroidia;o__Bacteroidales;f__Bacteroidaceae;g__Phocaeicola;s__Phocaeicola sp900551445	blast	91.7	iPHoP-RF;70.90
RGVC590	GB_GCA_900556845.1	d__Bacteria;p__Bacteroidota;c__Bacteroidia;o__Bacteroidales;f__Bacteroidaceae;g__Phocaeicola;s__Phocaeicola sp900556845	blast	90.7	iPHoP-RF;53.80
RGVC590	GB_GCA_902388365.1	d__Bacteria;p__Bacteroidota;c__Bacteroidia;o__Bacteroidales;f__Bacteroidaceae;g__Phocaeicola;s__Phocaeicola sp902388365	blast	92.1	iPHoP-RF;69.30
RGVC590	RS_GCF_000012825.1	d__Bacteria;p__Bacteroidota;c__Bacteroidia;o__Bacteroidales;f__Bacteroidaceae;g__Phocaeicola;s__Phocaeicola vulgatus	blast	92.1	iPHoP-RF;74.80
RGVC590	RS_GCF_000154205.1	d__Bacteria;p__Bacteroidota;c__Bacteroidia;o__Bacteroidales;f__Bacteroidaceae;g__Bacteroides;s__Bacteroides uniformis	blast	91.1	iPHoP-RF;82.80
RGVC590	RS_GCF_000158035.1	d__Bacteria;p__Bacteroidota;c__Bacteroidia;o__Bacteroidales;f__Bacteroidaceae;g__Bacteroides;s__Bacteroides cellulosilyticus	blast	91	iPHoP-RF;84.50
RGVC590	RS_GCF_000187895.1	d__Bacteria;p__Bacteroidota;c__Bacteroidia;o__Bacteroidales;f__Bacteroidaceae;g__Phocaeicola;s__Phocaeicola plebeius	blast	90.9	iPHoP-RF;87.90
RGVC590	RS_GCF_000190575.1	d__Bacteria;p__Bacteroidota;c__Bacteroidia;o__Bacteroidales;f__Bacteroidaceae;g__Phocaeicola;s__Phocaeicola salanitronis	blast	91.8	None
RGVC590	RS_GCF_000382445.1	d__Bacteria;p__Bacteroidota;c__Bacteroidia;o__Bacteroidales;f__Bacteroidaceae;g__Phocaeicola;s__Phocaeicola massiliensis	blast	92	iPHoP-RF;73.90
RGVC590	RS_GCF_000614185.1	d__Bacteria;p__Bacteroidota;c__Bacteroidia;o__Bacteroidales;f__Bacteroidaceae;g__Phocaeicola;s__Phocaeicola sartorii	blast	92.1	None
RGVC590	RS_GCF_001688725.2	d__Bacteria;p__Bacteroidota;c__Bacteroidia;o__Bacteroidales;f__Bacteroidaceae;g__Bacteroides;s__Bacteroides caecimuris	blast	91	iPHoP-RF;71.30
RGVC590	RS_GCF_002161565.1	d__Bacteria;p__Bacteroidota;c__Bacteroidia;o__Bacteroidales;f__Bacteroidaceae;g__Phocaeicola;s__Phocaeicola sp002161565	blast	92.1	None
RGVC590	RS_GCF_002161765.1	d__Bacteria;p__Bacteroidota;c__Bacteroidia;o__Bacteroidales;f__Bacteroidaceae;g__Phocaeicola;s__Phocaeicola sp002161765	blast	92.1	None
RGVC590	RS_GCF_003437535.1	d__Bacteria;p__Bacteroidota;c__Bacteroidia;o__Bacteroidales;f__Bacteroidaceae;g__Phocaeicola;s__Phocaeicola plebeius_A	blast	90.9	iPHoP-RF;87.60
RGVC590	RS_GCF_011959205.1	d__Bacteria;p__Bacteroidota;c__Bacteroidia;o__Bacteroidales;f__Bacteroidaceae;g__Phocaeicola;s__Phocaeicola sp011959205	blast	92.1	None
RGVC590	RS_GCF_013009555.1	d__Bacteria;p__Bacteroidota;c__Bacteroidia;o__Bacteroidales;f__Bacteroidaceae;g__Phocaeicola;s__Phocaeicola dorei	blast	92.1	iPHoP-RF;54.90
RGVC590	RS_GCF_013618865.1	d__Bacteria;p__Bacteroidota;c__Bacteroidia;o__Bacteroidales;f__Bacteroidaceae;g__Phocaeicola;s__Phocaeicola sp900541515	blast	91.9	iPHoP-RF;52.00
RGVC590	RS_GCF_900128455.1	d__Bacteria;p__Bacteroidota;c__Bacteroidia;o__Bacteroidales;f__Bacteroidaceae;g__Phocaeicola;s__Phocaeicola mediterraneensis	blast	91.7	iPHoP-RF;69.50
RGVC590	RS_GCF_900128495.1	d__Bacteria;p__Bacteroidota;c__Bacteroidia;o__Bacteroidales;f__Bacteroidaceae;g__Phocaeicola;s__Phocaeicola ilei	blast	90.7	None
RGVC590	RS_GCF_900291465.1	d__Bacteria;p__Bacteroidota;c__Bacteroidia;o__Bacteroidales;f__Bacteroidaceae;g__CAG-462;s__CAG-462 sp900291465	blast	92	iPHoP-RF;70.00
RGVC590	RS_GCF_900751965.1	d__Bacteria;p__Bacteroidota;c__Bacteroidia;o__Bacteroidales;f__Bacteroidaceae;g__Phocaeicola;s__Phocaeicola sp900751965	blast	92.1	iPHoP-RF;59.50
RGVC590	RS_GCF_900760755.1	d__Bacteria;p__Bacteroidota;c__Bacteroidia;o__Bacteroidales;f__Bacteroidaceae;g__OM05-12;s__OM05-12 sp900760755	blast	91.9	iPHoP-RF;70.20
RGVC590	RS_GCF_900760795.1	d__Bacteria;p__Bacteroidota;c__Bacteroidia;o__Bacteroidales;f__Bacteroidaceae;g__Phocaeicola;s__Phocaeicola sp900760795	blast	92.1	iPHoP-RF;76.80
RGVC590	RS_GCF_902362595.1	d__Bacteria;p__Bacteroidota;c__Bacteroidia;o__Bacteroidales;f__Bacteroidaceae;g__Phocaeicola;s__Phocaeicola sp900066455	blast	91.4	iPHoP-RF;62.70
RGVC590	RS_GCF_903181435.1	d__Bacteria;p__Bacteroidota;c__Bacteroidia;o__Bacteroidales;f__Bacteroidaceae;g__Bacteroides;s__Bacteroides acidifaciens_A	blast	91	iPHoP-RF;74.80
RGVC592	RS_GCF_002161215.1	d__Bacteria;p__Firmicutes_A;c__Clostridia;o__Oscillospirales;f__Oscillospiraceae;g__Flavonifractor;s__Flavonifractor sp002161215	blast	91	None
RGVC592	RS_GCF_900626145.1	d__Bacteria;p__Firmicutes_A;c__Clostridia;o__Oscillospirales;f__Oscillospiraceae;g__Intestinimonas;s__Intestinimonas timonensis	blast	93.5	None
RGVC594	3300010259_5	d__Bacteria;p__Firmicutes_A;c__Clostridia;o__Oscillospirales;f__Oscillospiraceae;g__CAG-110;s__	blast	90.1	None
RGVC594	3300010278_34	d__Bacteria;p__Firmicutes_A;c__Clostridia;o__Oscillospirales;f__Oscillospiraceae;g__CAG-110;s__	blast	93.6	iPHoP-RF;63.80
RGVC594	3300010280_27	d__Bacteria;p__Firmicutes_A;c__Clostridia;o__Oscillospirales;f__Oscillospiraceae;g__CAG-110;s__	blast	92.1	None
RGVC594	3300022660_140	d__Bacteria;p__Firmicutes_A;c__Clostridia;o__Oscillospirales;f__Oscillospiraceae;g__CAG-110;s__	blast	92.1	iPHoP-RF;62.20
RGVC594	GB_GCA_000434635.1	d__Bacteria;p__Firmicutes_A;c__Clostridia;o__Oscillospirales;f__Oscillospiraceae;g__CAG-110;s__CAG-110 sp000434635	blast	91.9	iPHoP-RF;63.50
RGVC594	GB_GCA_002362145.1	d__Bacteria;p__Firmicutes_A;c__Clostridia;o__Oscillospirales;f__Oscillospiraceae;g__CAG-110;s__CAG-110 sp002362145	blast	92.1	iPHoP-RF;56.80
RGVC594	GB_GCA_002362625.1	d__Bacteria;p__Firmicutes_A;c__Clostridia;o__Oscillospirales;f__Oscillospiraceae;g__CAG-110;s__CAG-110 sp002362625	blast	92.1	None
RGVC594	GB_GCA_002436765.1	d__Bacteria;p__Firmicutes_A;c__Clostridia;o__Oscillospirales;f__Oscillospiraceae;g__CAG-110;s__CAG-110 sp002436765	blast	92.1	iPHoP-RF;56.20
RGVC594	GB_GCA_002437585.1	d__Bacteria;p__Firmicutes_A;c__Clostridia;o__Oscillospirales;f__Oscillospiraceae;g__CAG-110;s__CAG-110 sp002437585	blast	92.1	iPHoP-RF;61.70
RGVC594	GB_GCA_002493965.1	d__Bacteria;p__Firmicutes_A;c__Clostridia;o__Oscillospirales;f__Oscillospiraceae;g__CAG-110;s__CAG-110 sp002493965	blast	92.1	None
RGVC594	GB_GCA_004555705.1	d__Bacteria;p__Firmicutes_A;c__Clostridia;o__Oscillospirales;f__Oscillospiraceae;g__CAG-110;s__CAG-110 sp004555705	blast	92.1	iPHoP-RF;70.00
RGVC594	GB_GCA_004562395.1	d__Bacteria;p__Firmicutes_A;c__Clostridia;o__Oscillospirales;f__Oscillospiraceae;g__CAG-110;s__CAG-110 sp004562395	blast	91.8	iPHoP-RF;65.30
RGVC594	GB_GCA_900540635.1	d__Bacteria;p__Firmicutes_A;c__Clostridia;o__Oscillospirales;f__Oscillospiraceae;g__CAG-110;s__CAG-110 sp900540635	blast	93.9	None
RGVC594	GB_GCA_900544405.1	d__Bacteria;p__Firmicutes_A;c__Clostridia;o__Oscillospirales;f__Oscillospiraceae;g__CAG-110;s__CAG-110 sp900544405	blast	92.1	iPHoP-RF;59.80
RGVC594	GB_GCA_900544945.1	d__Bacteria;p__Firmicutes_A;c__Clostridia;o__Oscillospirales;f__Oscillospiraceae;g__CAG-110;s__CAG-110 sp900544945	blast	92.1	iPHoP-RF;60.60
RGVC594	GB_GCA_900546075.1	d__Bacteria;p__Firmicutes_A;c__Clostridia;o__Oscillospirales;f__Oscillospiraceae;g__CAG-110;s__CAG-110 sp900546075	blast	91.7	iPHoP-RF;68.90
RGVC594	GB_GCA_900549495.1	d__Bacteria;p__Firmicutes_A;c__Clostridia;o__Oscillospirales;f__Oscillospiraceae;g__CAG-110;s__CAG-110 sp900549495	blast	93.5	iPHoP-RF;55.40
RGVC594	GB_GCA_900549705.1	d__Bacteria;p__Firmicutes_A;c__Clostridia;o__Oscillospirales;f__Oscillospiraceae;g__CAG-110;s__CAG-110 sp900549705	blast	93	iPHoP-RF;50.40
RGVC594	GB_GCA_900553805.1	d__Bacteria;p__Firmicutes_A;c__Clostridia;o__Oscillospirales;f__Oscillospiraceae;g__CAG-110;s__CAG-110 sp900553805	blast	91.9	iPHoP-RF;59.50
RGVC594	GB_GCA_900752285.1	d__Bacteria;p__Firmicutes_A;c__Clostridia;o__Oscillospirales;f__Oscillospiraceae;g__CAG-110;s__CAG-110 sp900752285	blast	92.1	iPHoP-RF;63.50
RGVC594	GB_GCA_900762245.1	d__Bacteria;p__Firmicutes_A;c__Clostridia;o__Oscillospirales;f__Oscillospiraceae;g__CAG-110;s__CAG-110 sp900762245	blast	92.1	None
RGVC594	GB_GCA_900763965.1	d__Bacteria;p__Firmicutes_A;c__Clostridia;o__Oscillospirales;f__Oscillospiraceae;g__CAG-110;s__CAG-110 sp900763965	blast	92.1	None
RGVC594	GB_GCA_900769845.1	d__Bacteria;p__Firmicutes_A;c__Clostridia;o__Oscillospirales;f__Oscillospiraceae;g__CAG-110;s__CAG-110 sp900769845	blast	92.1	None
RGVC594	GB_GCA_900770015.1	d__Bacteria;p__Firmicutes_A;c__Clostridia;o__Oscillospirales;f__Oscillospiraceae;g__CAG-110;s__CAG-110 sp900770015	blast	92	None
RGVC597	GB_GCA_002482535.1	d__Bacteria;p__Firmicutes_B;c__Dehalobacteriia;o__UBA7702;f__UBA7702;g__UBA7702;s__UBA7702 sp002482535	blast	91.7	iPHoP-RF;61.90
RGVC597	GB_GCA_902766525.1	d__Bacteria;p__Firmicutes_B;c__Dehalobacteriia;o__UBA7702;f__UBA7702;g__UBA7702;s__UBA7702 sp902766525	blast	92.4	None
RGVC597	GB_GCA_902796855.1	d__Bacteria;p__Firmicutes_B;c__Dehalobacteriia;o__UBA7702;f__UBA7702;g__UBA7702;s__UBA7702 sp902796855	blast	92.6	iPHoP-RF;63.80
RGVC598	RS_GCF_008727735.1	d__Bacteria;p__Firmicutes_A;c__Clostridia;o__Oscillospirales;f__Oscillospiraceae;g__Lawsonibacter;s__Lawsonibacter sp000177015	blast	92.9	None
RGVC598	RS_GCF_900626145.1	d__Bacteria;p__Firmicutes_A;c__Clostridia;o__Oscillospirales;f__Oscillospiraceae;g__Intestinimonas;s__Intestinimonas timonensis	blast	91.4	None
RGVC599	RS_GCF_000210575.1	d__Bacteria;p__Bacteroidota;c__Bacteroidia;o__Bacteroidales;f__Rikenellaceae;g__Alistipes;s__Alistipes shahii	blast	96.8	iPHoP-RF;54.90
RGVC599	RS_GCF_900083545.1	d__Bacteria;p__Bacteroidota;c__Bacteroidia;o__Bacteroidales;f__Rikenellaceae;g__Alistipes;s__Alistipes provencensis	blast	91.2	iPHoP-RF;53.80
RGVC599	RS_GCF_900290115.1	d__Bacteria;p__Bacteroidota;c__Bacteroidia;o__Bacteroidales;f__Rikenellaceae;g__Alistipes;s__Alistipes sp900290115	blast	91.2	None
RGVC599	GB_GCA_900542505.1	d__Bacteria;p__Bacteroidota;c__Bacteroidia;o__Bacteroidales;f__Rikenellaceae;g__Alistipes;s__Alistipes sp900542505	blast	90.8	None
RGVC600	3300010259_5	d__Bacteria;p__Firmicutes_A;c__Clostridia;o__Oscillospirales;f__Oscillospiraceae;g__CAG-110;s__	blast	91	None
RGVC600	3300010280_27	d__Bacteria;p__Firmicutes_A;c__Clostridia;o__Oscillospirales;f__Oscillospiraceae;g__CAG-110;s__	blast	90.9	None
RGVC600	3300022660_140	d__Bacteria;p__Firmicutes_A;c__Clostridia;o__Oscillospirales;f__Oscillospiraceae;g__CAG-110;s__	blast	91.7	None
RGVC600	GB_GCA_000434635.1	d__Bacteria;p__Firmicutes_A;c__Clostridia;o__Oscillospirales;f__Oscillospiraceae;g__CAG-110;s__CAG-110 sp000434635	blast	96.9	iPHoP-RF;68.20
RGVC600	GB_GCA_002362625.1	d__Bacteria;p__Firmicutes_A;c__Clostridia;o__Oscillospirales;f__Oscillospiraceae;g__CAG-110;s__CAG-110 sp002362625	blast	91.9	None
RGVC600	GB_GCA_002436765.1	d__Bacteria;p__Firmicutes_A;c__Clostridia;o__Oscillospirales;f__Oscillospiraceae;g__CAG-110;s__CAG-110 sp002436765	blast	96.8	iPHoP-RF;63.50
RGVC600	GB_GCA_002437585.1	d__Bacteria;p__Firmicutes_A;c__Clostridia;o__Oscillospirales;f__Oscillospiraceae;g__CAG-110;s__CAG-110 sp002437585	blast	91.2	None
RGVC600	GB_GCA_002493965.1	d__Bacteria;p__Firmicutes_A;c__Clostridia;o__Oscillospirales;f__Oscillospiraceae;g__CAG-110;s__CAG-110 sp002493965	blast	91.7	None
RGVC600	GB_GCA_004555705.1	d__Bacteria;p__Firmicutes_A;c__Clostridia;o__Oscillospirales;f__Oscillospiraceae;g__CAG-110;s__CAG-110 sp004555705	blast	91.2	None
RGVC600	GB_GCA_900540635.1	d__Bacteria;p__Firmicutes_A;c__Clostridia;o__Oscillospirales;f__Oscillospiraceae;g__CAG-110;s__CAG-110 sp900540635	blast	91	None
RGVC600	GB_GCA_900544405.1	d__Bacteria;p__Firmicutes_A;c__Clostridia;o__Oscillospirales;f__Oscillospiraceae;g__CAG-110;s__CAG-110 sp900544405	blast	92.1	None
RGVC600	GB_GCA_900544945.1	d__Bacteria;p__Firmicutes_A;c__Clostridia;o__Oscillospirales;f__Oscillospiraceae;g__CAG-110;s__CAG-110 sp900544945	blast	91.2	None
RGVC600	GB_GCA_900546075.1	d__Bacteria;p__Firmicutes_A;c__Clostridia;o__Oscillospirales;f__Oscillospiraceae;g__CAG-110;s__CAG-110 sp900546075	blast	90.4	iPHoP-RF;61.90
RGVC600	GB_GCA_900547405.1	d__Bacteria;p__Firmicutes_A;c__Clostridia;o__Oscillospirales;f__Oscillospiraceae;g__CAG-110;s__CAG-110 sp900547405	blast	91	None
RGVC600	GB_GCA_900549495.1	d__Bacteria;p__Firmicutes_A;c__Clostridia;o__Oscillospirales;f__Oscillospiraceae;g__CAG-110;s__CAG-110 sp900549495	blast	91.1	None
RGVC600	GB_GCA_900549705.1	d__Bacteria;p__Firmicutes_A;c__Clostridia;o__Oscillospirales;f__Oscillospiraceae;g__CAG-110;s__CAG-110 sp900549705	blast	91.7	None
RGVC600	GB_GCA_900762245.1	d__Bacteria;p__Firmicutes_A;c__Clostridia;o__Oscillospirales;f__Oscillospiraceae;g__CAG-110;s__CAG-110 sp900762245	blast	91.2	None
RGVC600	GB_GCA_900763965.1	d__Bacteria;p__Firmicutes_A;c__Clostridia;o__Oscillospirales;f__Oscillospiraceae;g__CAG-110;s__CAG-110 sp900763965	blast	91.2	None
RGVC600	GB_GCA_900769845.1	d__Bacteria;p__Firmicutes_A;c__Clostridia;o__Oscillospirales;f__Oscillospiraceae;g__CAG-110;s__CAG-110 sp900769845	blast	91	None
RGVC600	GB_GCA_900770015.1	d__Bacteria;p__Firmicutes_A;c__Clostridia;o__Oscillospirales;f__Oscillospiraceae;g__CAG-110;s__CAG-110 sp900770015	blast	90.9	None
RGVC601	GB_GCA_003539515.1	d__Bacteria;p__Firmicutes_A;c__Clostridia_A;o__Christensenellales;f__CAG-917;g__CAG-349;s__CAG-349 sp003539515	blast	90.1	None
RGVC602	3300010275_16	d__Bacteria;p__Firmicutes_A;c__Clostridia;o__Lachnospirales;f__Lachnospiraceae;g__Acetatifactor;s__	blast	93.9	None
RGVC602	GB_GCA_009177215.1	d__Bacteria;p__Firmicutes_A;c__Clostridia;o__Lachnospirales;f__Lachnospiraceae;g__Acetatifactor;s__Acetatifactor sp009177215	blast	93.3	None
RGVC602	GB_GCA_014337175.1	d__Bacteria;p__Firmicutes_A;c__Clostridia;o__Lachnospirales;f__Lachnospiraceae;g__Acetatifactor;s__Acetatifactor sp900066365	blast	92.8	iPHoP-RF;83.10
RGVC602	GB_GCA_002431915.1	d__Bacteria;p__Firmicutes_A;c__Clostridia;o__Lachnospirales;f__Lachnospiraceae;g__Acetatifactor;s__Acetatifactor sp002431915	blast	92.1	iPHoP-RF;66.00
RGVC602	GB_GCA_003447295.1	d__Bacteria;p__Firmicutes_A;c__Clostridia;o__Lachnospirales;f__Lachnospiraceae;g__Acetatifactor;s__Acetatifactor sp003447295	blast	92.1	iPHoP-RF;68.60
RGVC602	RS_GCF_900771995.1	d__Bacteria;p__Firmicutes_A;c__Clostridia;o__Lachnospirales;f__Lachnospiraceae;g__Acetatifactor;s__Acetatifactor sp900771995	blast	92.1	iPHoP-RF;66.00
RGVC602	RS_GCF_900772845.1	d__Bacteria;p__Firmicutes_A;c__Clostridia;o__Lachnospirales;f__Lachnospiraceae;g__Acetatifactor;s__Acetatifactor sp900772845	blast	92.1	iPHoP-RF;66.80
RGVC602	RS_GCF_900766575.1	d__Bacteria;p__Firmicutes_A;c__Clostridia;o__Lachnospirales;f__Lachnospiraceae;g__Acetatifactor;s__Acetatifactor sp900766575	blast	92	iPHoP-RF;61.70
RGVC602	GB_GCA_000434615.1	d__Bacteria;p__Firmicutes_A;c__Clostridia;o__Lachnospirales;f__Lachnospiraceae;g__CAG-510;s__CAG-510 sp000434615	blast	91.9	iPHoP-RF;63.00
RGVC602	GB_GCA_002432425.1	d__Bacteria;p__Firmicutes_A;c__Clostridia;o__Lachnospirales;f__Lachnospiraceae;g__CAG-510;s__CAG-510 sp002432425	blast	91.9	iPHoP-RF;63.50
RGVC602	GB_GCA_900551115.1	d__Bacteria;p__Firmicutes_A;c__Clostridia;o__Lachnospirales;f__Lachnospiraceae;g__CAG-510;s__CAG-510 sp900551115	blast	91.9	None
RGVC602	2703719135	d__Bacteria;p__Firmicutes_A;c__Clostridia;o__Lachnospirales;f__Lachnospiraceae;g__Acetatifactor;s__	blast	91.8	iPHoP-RF;63.80
RGVC602	GB_GCA_900554205.1	d__Bacteria;p__Firmicutes_A;c__Clostridia;o__Lachnospirales;f__Lachnospiraceae;g__Acetatifactor;s__Acetatifactor sp900554205	blast	91.8	iPHoP-RF;65.80
RGVC602	RS_GCF_900755865.1	d__Bacteria;p__Firmicutes_A;c__Clostridia;o__Lachnospirales;f__Lachnospiraceae;g__Acetatifactor;s__Acetatifactor sp900755865	blast	91.8	iPHoP-RF;66.80
RGVC602	2703719137	d__Bacteria;p__Firmicutes_A;c__Clostridia;o__Lachnospirales;f__Lachnospiraceae;g__Acetatifactor;s__	blast	91.7	iPHoP-RF;64.30
RGVC602	3300021319_11	d__Bacteria;p__Firmicutes_A;c__Clostridia;o__Lachnospirales;f__Lachnospiraceae;g__Acetatifactor;s__	blast	91.7	iPHoP-RF;50.90
RGVC602	GB_GCA_002314715.1	d__Bacteria;p__Firmicutes_A;c__Clostridia;o__Lachnospirales;f__Lachnospiraceae;g__Acetatifactor;s__Acetatifactor sp002314715	blast	91.7	iPHoP-RF;60.60
RGVC602	GB_GCA_902766425.1	d__Bacteria;p__Firmicutes_A;c__Clostridia;o__Lachnospirales;f__Lachnospiraceae;g__Acetatifactor;s__Acetatifactor sp902766425	blast	91.7	iPHoP-RF;63.30
RGVC602	GB_GCA_902796105.1	d__Bacteria;p__Firmicutes_A;c__Clostridia;o__Lachnospirales;f__Lachnospiraceae;g__Acetatifactor;s__Acetatifactor sp902796105	blast	91.7	iPHoP-RF;57.10
RGVC602	RS_GCF_003584705.1	d__Bacteria;p__Firmicutes_A;c__Clostridia;o__Lachnospirales;f__Lachnospiraceae;g__Acetatifactor;s__Acetatifactor sp900066565	blast	91.7	iPHoP-RF;79.00
RGVC602	RS_GCF_900760705.1	d__Bacteria;p__Firmicutes_A;c__Clostridia;o__Lachnospirales;f__Lachnospiraceae;g__Acetatifactor;s__Acetatifactor sp900760705	blast	91.7	iPHoP-RF;67.00
RGVC603	3300022661_76	d__Bacteria;p__Bacteroidota;c__Bacteroidia;o__Bacteroidales;f__Bacteroidaceae;g__;s__	blast	93.7	iPHoP-RF;69.50
RGVC603	3300022661_113	d__Bacteria;p__Bacteroidota;c__Bacteroidia;o__Bacteroidales;f__Bacteroidaceae;g__HGM04593;s__	blast	92.1	iPHoP-RF;71.10
RGVC603	RS_GCF_900770655.1	d__Bacteria;p__Bacteroidota;c__Bacteroidia;o__Bacteroidales;f__Bacteroidaceae;g__HGM04593;s__HGM04593 sp900770655	blast	92.1	iPHoP-RF;70.00
RGVC603	RS_GCF_900769465.1	d__Bacteria;p__Bacteroidota;c__Bacteroidia;o__Bacteroidales;f__Bacteroidaceae;g__HGM04593;s__HGM04593 sp900769465	blast	91.6	iPHoP-RF;70.20
RGVC603	RS_GCF_900770665.1	d__Bacteria;p__Bacteroidota;c__Bacteroidia;o__Bacteroidales;f__Bacteroidaceae;g__HGM04593;s__HGM04593 sp900770665	blast	90.6	iPHoP-RF;71.30
RGVC603	3300018430_43	d__Bacteria;p__Bacteroidota;c__Bacteroidia;o__Bacteroidales;f__Bacteroidaceae;g__HGM04593;s__	blast	90	iPHoP-RF;68.20
RGVC603	RS_GCF_900769765.1	d__Bacteria;p__Bacteroidota;c__Bacteroidia;o__Bacteroidales;f__Bacteroidaceae;g__HGM04593;s__HGM04593 sp900769765	blast	90	iPHoP-RF;71.90
RGVC606	GB_GCA_014384785.1	d__Bacteria;p__Firmicutes_A;c__Clostridia;o__Monoglobales_A;f__UBA9506;g__UBA9506;s__UBA9506 sp003506415	blast	91.3	None
RGVC608	GB_GCA_000434635.1	d__Bacteria;p__Firmicutes_A;c__Clostridia;o__Oscillospirales;f__Oscillospiraceae;g__CAG-110;s__CAG-110 sp000434635	blast	93.9	iPHoP-RF;64.80
RGVC608	GB_GCA_900546075.1	d__Bacteria;p__Firmicutes_A;c__Clostridia;o__Oscillospirales;f__Oscillospiraceae;g__CAG-110;s__CAG-110 sp900546075	blast	93.8	iPHoP-RF;77.30
RGVC608	GB_GCA_002436765.1	d__Bacteria;p__Firmicutes_A;c__Clostridia;o__Oscillospirales;f__Oscillospiraceae;g__CAG-110;s__CAG-110 sp002436765	blast	93.6	iPHoP-RF;60.90
RGVC608	GB_GCA_002437585.1	d__Bacteria;p__Firmicutes_A;c__Clostridia;o__Oscillospirales;f__Oscillospiraceae;g__CAG-110;s__CAG-110 sp002437585	blast	93.6	iPHoP-RF;71.30
RGVC608	GB_GCA_900549495.1	d__Bacteria;p__Firmicutes_A;c__Clostridia;o__Oscillospirales;f__Oscillospiraceae;g__CAG-110;s__CAG-110 sp900549495	blast	93.6	iPHoP-RF;67.00
RGVC608	3300022660_140	d__Bacteria;p__Firmicutes_A;c__Clostridia;o__Oscillospirales;f__Oscillospiraceae;g__CAG-110;s__	blast	92.1	iPHoP-RF;69.10
RGVC608	GB_GCA_002493965.1	d__Bacteria;p__Firmicutes_A;c__Clostridia;o__Oscillospirales;f__Oscillospiraceae;g__CAG-110;s__CAG-110 sp002493965	blast	92.1	None
RGVC608	GB_GCA_004555705.1	d__Bacteria;p__Firmicutes_A;c__Clostridia;o__Oscillospirales;f__Oscillospiraceae;g__CAG-110;s__CAG-110 sp004555705	blast	92.1	iPHoP-RF;70.90
RGVC608	GB_GCA_900544405.1	d__Bacteria;p__Firmicutes_A;c__Clostridia;o__Oscillospirales;f__Oscillospiraceae;g__CAG-110;s__CAG-110 sp900544405	blast	92.1	iPHoP-RF;52.20
RGVC608	GB_GCA_900554625.1	d__Bacteria;p__Firmicutes_A;c__Clostridia;o__Oscillospirales;f__Oscillospiraceae;g__CAG-110;s__CAG-110 sp900554625	blast	92.1	iPHoP-RF;56.50
RGVC608	GB_GCA_900762245.1	d__Bacteria;p__Firmicutes_A;c__Clostridia;o__Oscillospirales;f__Oscillospiraceae;g__CAG-110;s__CAG-110 sp900762245	blast	92.1	iPHoP-RF;81.40
RGVC608	GB_GCA_900762935.1	d__Bacteria;p__Firmicutes_A;c__Clostridia;o__Oscillospirales;f__Oscillospiraceae;g__CAG-110;s__CAG-110 sp900762935	blast	92.1	iPHoP-RF;58.70
RGVC608	GB_GCA_900763965.1	d__Bacteria;p__Firmicutes_A;c__Clostridia;o__Oscillospirales;f__Oscillospiraceae;g__CAG-110;s__CAG-110 sp900763965	blast	92.1	iPHoP-RF;64.30
RGVC608	GB_GCA_900769835.1	d__Bacteria;p__Firmicutes_A;c__Clostridia;o__Oscillospirales;f__Oscillospiraceae;g__CAG-110;s__CAG-110 sp900769835	blast	92.1	iPHoP-RF;63.30
RGVC608	3300010259_5	d__Bacteria;p__Firmicutes_A;c__Clostridia;o__Oscillospirales;f__Oscillospiraceae;g__CAG-110;s__	blast	92	iPHoP-RF;51.20
RGVC608	GB_GCA_900540635.1	d__Bacteria;p__Firmicutes_A;c__Clostridia;o__Oscillospirales;f__Oscillospiraceae;g__CAG-110;s__CAG-110 sp900540635	blast	92	iPHoP-RF;51.70
RGVC608	GB_GCA_900544945.1	d__Bacteria;p__Firmicutes_A;c__Clostridia;o__Oscillospirales;f__Oscillospiraceae;g__CAG-110;s__CAG-110 sp900544945	blast	92	iPHoP-RF;70.00
RGVC608	GB_GCA_900547405.1	d__Bacteria;p__Firmicutes_A;c__Clostridia;o__Oscillospirales;f__Oscillospiraceae;g__CAG-110;s__CAG-110 sp900547405	blast	92	iPHoP-RF;50.20
RGVC608	GB_GCA_900556935.1	d__Bacteria;p__Firmicutes_A;c__Clostridia;o__Oscillospirales;f__Oscillospiraceae;g__CAG-110;s__CAG-110 sp900556935	blast	92	iPHoP-RF;62.20
RGVC608	GB_GCA_900752285.1	d__Bacteria;p__Firmicutes_A;c__Clostridia;o__Oscillospirales;f__Oscillospiraceae;g__CAG-110;s__CAG-110 sp900752285	blast	92	iPHoP-RF;65.10
RGVC608	GB_GCA_900769845.1	d__Bacteria;p__Firmicutes_A;c__Clostridia;o__Oscillospirales;f__Oscillospiraceae;g__CAG-110;s__CAG-110 sp900769845	blast	92	iPHoP-RF;62.70
RGVC608	3300010280_27	d__Bacteria;p__Firmicutes_A;c__Clostridia;o__Oscillospirales;f__Oscillospiraceae;g__CAG-110;s__	blast	91.4	None
RGVC608	GB_GCA_900770015.1	d__Bacteria;p__Firmicutes_A;c__Clostridia;o__Oscillospirales;f__Oscillospiraceae;g__CAG-110;s__CAG-110 sp900770015	blast	91.4	iPHoP-RF;52.00
RGVC608	GB_GCA_004562395.1	d__Bacteria;p__Firmicutes_A;c__Clostridia;o__Oscillospirales;f__Oscillospiraceae;g__CAG-110;s__CAG-110 sp004562395	blast	90.4	iPHoP-RF;57.30
RGVC609	3300027276_32	d__Bacteria;p__Firmicutes_A;c__Clostridia;o__Oscillospirales;f__Oscillospiraceae;g__CAG-83;s__	blast	92.7	iPHoP-RF;64.80
RGVC609	3300029122_23	d__Bacteria;p__Firmicutes_A;c__Clostridia;o__Oscillospirales;f__Oscillospiraceae;g__CAG-83;s__	iPHoP-RF	91.1	blast;90.70
RGVC609	GB_GCA_000431575.1	d__Bacteria;p__Firmicutes_A;c__Clostridia;o__Oscillospirales;f__Oscillospiraceae;g__CAG-83;s__CAG-83 sp000431575	blast	92.1	iPHoP-RF;67.00
RGVC609	GB_GCA_900545495.1	d__Bacteria;p__Firmicutes_A;c__Clostridia;o__Oscillospirales;f__Oscillospiraceae;g__CAG-83;s__CAG-83 sp900545495	blast	90.7	iPHoP-RF;90.50
RGVC609	GB_GCA_900545585.1	d__Bacteria;p__Firmicutes_A;c__Clostridia;o__Oscillospirales;f__Oscillospiraceae;g__CAG-83;s__CAG-83 sp900545585	blast	90.7	iPHoP-RF;74.60
RGVC609	GB_GCA_900547745.1	d__Bacteria;p__Firmicutes_A;c__Clostridia;o__Oscillospirales;f__Oscillospiraceae;g__CAG-83;s__CAG-83 sp900547745	iPHoP-RF	91.1	blast;89.20
RGVC610	RS_GCF_900104635.1	d__Bacteria;p__Firmicutes_A;c__Clostridia;o__Lachnospirales;f__Lachnospiraceae;g__Faecalimonas;s__Faecalimonas phoceensis	blast	93.4	iPHoP-RF;68.90
RGVC610	3300010261_15	d__Bacteria;p__Firmicutes_A;c__Clostridia;o__Lachnospirales;f__Lachnospiraceae;g__;s__	blast	92.1	None
RGVC610	GB_GCA_004560705.1	d__Bacteria;p__Firmicutes_A;c__Clostridia;o__Lachnospirales;f__Lachnospiraceae;g__Bariatricus;s__Bariatricus sp004560705	blast	92.1	iPHoP-RF;57.90
RGVC610	RS_GCF_000509125.1	d__Bacteria;p__Firmicutes_A;c__Clostridia;o__Lachnospirales;f__Lachnospiraceae;g__Clostridium_AP;s__Clostridium_AP sp000509125	blast	92.1	iPHoP-RF;60.10
RGVC610	RS_GCF_001280875.1	d__Bacteria;p__Firmicutes_A;c__Clostridia;o__Lachnospirales;f__Lachnospiraceae;g__Sellimonas;s__Sellimonas intestinalis	blast	92.1	None
RGVC610	RS_GCF_001404335.1	d__Bacteria;p__Firmicutes_A;c__Clostridia;o__Lachnospirales;f__Lachnospiraceae;g__Muricomes;s__Muricomes contortus_B	blast	92.1	iPHoP-RF;55.70
RGVC610	RS_GCF_003458885.1	d__Bacteria;p__Firmicutes_A;c__Clostridia;o__Lachnospirales;f__Lachnospiraceae;g__UBA9414;s__UBA9414 sp003458885	blast	92.1	None
RGVC610	RS_GCF_003477705.1	d__Bacteria;p__Firmicutes_A;c__Clostridia;o__Lachnospirales;f__Lachnospiraceae;g__Lachnoclostridium_B;s__Lachnoclostridium_B sp900066555	blast	92.1	None
RGVC610	RS_GCF_003480425.1	d__Bacteria;p__Firmicutes_A;c__Clostridia;o__Lachnospirales;f__Lachnospiraceae;g__Schaedlerella;s__Schaedlerella sp900066545	blast	92.1	None
RGVC610	RS_GCF_004295125.1	d__Bacteria;p__Firmicutes_A;c__Clostridia;o__Lachnospirales;f__Lachnospiraceae;g__Clostridium_AP;s__Clostridium_AP scindens	blast	92.1	iPHoP-RF;58.70
RGVC610	RS_GCF_008121495.1	d__Bacteria;p__Firmicutes_A;c__Clostridia;o__Lachnospirales;f__Lachnospiraceae;g__Ruminococcus_B;s__Ruminococcus_B gnavus	blast	92.1	iPHoP-RF;62.20
RGVC610	RS_GCF_008281175.1	d__Bacteria;p__Firmicutes_A;c__Clostridia;o__Lachnospirales;f__Lachnospiraceae;g__Extibacter;s__Extibacter hylemonae	blast	92.1	iPHoP-RF;58.70
RGVC610	RS_GCF_009830285.1	d__Bacteria;p__Firmicutes_A;c__Clostridia;o__Lachnospirales;f__Lachnospiraceae;g__ASTD01;s__ASTD01 sp009830285	blast	92.1	None
RGVC610	RS_GCF_900142165.1	d__Bacteria;p__Firmicutes_A;c__Clostridia;o__Lachnospirales;f__Lachnospiraceae;g__Hespellia;s__Hespellia stercorisuis	blast	92.1	None
RGVC610	RS_GCF_900240315.1	d__Bacteria;p__Firmicutes_A;c__Clostridia;o__Lachnospirales;f__Lachnospiraceae;g__Dorea_B;s__Dorea_B phocaeensis	blast	92.1	iPHoP-RF;50.20
RGVC610	RS_GCF_900765975.1	d__Bacteria;p__Firmicutes_A;c__Clostridia;o__Lachnospirales;f__Lachnospiraceae;g__Schaedlerella;s__Schaedlerella sp900765975	blast	92.1	iPHoP-RF;59.20
RGVC610	RS_GCF_902381685.1	d__Bacteria;p__Firmicutes_A;c__Clostridia;o__Lachnospirales;f__Lachnospiraceae;g__Faecalimonas;s__Faecalimonas sp000209385	blast	92	iPHoP-RF;69.50
RGVC610	GB_GCA_900316755.1	d__Bacteria;p__Firmicutes_A;c__Clostridia;o__Lachnospirales;f__Lachnospiraceae;g__Faecalimonas;s__Faecalimonas sp900316755	blast	91.9	None
RGVC610	GB_GCA_900550235.1	d__Bacteria;p__Firmicutes_A;c__Clostridia;o__Lachnospirales;f__Lachnospiraceae;g__Faecalimonas;s__Faecalimonas sp900550235	blast	91.9	iPHoP-RF;58.40
RGVC610	GB_GCA_900555395.1	d__Bacteria;p__Firmicutes_A;c__Clostridia;o__Lachnospirales;f__Lachnospiraceae;g__Faecalimonas;s__Faecalimonas sp900555395	blast	91.9	iPHoP-RF;50.40
RGVC610	GB_GCA_900551895.1	d__Bacteria;p__Firmicutes_A;c__Clostridia;o__Lachnospirales;f__Lachnospiraceae;g__Faecalimonas;s__Faecalimonas sp900551895	blast	91.8	iPHoP-RF;66.30
RGVC610	GB_GCA_900546325.1	d__Bacteria;p__Firmicutes_A;c__Clostridia;o__Lachnospirales;f__Lachnospiraceae;g__Faecalimonas;s__Faecalimonas sp900546325	blast	91.7	iPHoP-RF;64.00
RGVC610	RS_GCF_004346095.1	d__Bacteria;p__Firmicutes_A;c__Clostridia;o__Lachnospirales;f__Lachnospiraceae;g__Faecalimonas;s__Faecalimonas umbilicata	blast	91.7	iPHoP-RF;65.10
RGVC610	GB_GCA_000433535.1	d__Bacteria;p__Firmicutes_A;c__Clostridia;o__Lachnospirales;f__Lachnospiraceae;g__CAG-317;s__CAG-317 sp000433535	blast	90.7	None
RGVC610	GB_GCA_004556565.1	d__Bacteria;p__Firmicutes_A;c__Clostridia;o__Lachnospirales;f__Lachnospiraceae;g__Schaedlerella;s__Schaedlerella sp004556565	blast	90.7	None
RGVC610	GB_GCA_900543415.1	d__Bacteria;p__Firmicutes_A;c__Clostridia;o__Lachnospirales;f__Lachnospiraceae;g__CAG-317;s__CAG-317 sp900543415	blast	90.7	None
RGVC610	GB_GCA_900550865.1	d__Bacteria;p__Firmicutes_A;c__Clostridia;o__Lachnospirales;f__Lachnospiraceae;g__Dorea_A;s__Dorea_A sp900550865	blast	90.7	None
RGVC610	RS_GCF_000154065.1	d__Bacteria;p__Firmicutes_A;c__Clostridia;o__Lachnospirales;f__Lachnospiraceae;g__Dorea_A;s__Dorea_A longicatena	blast	90.7	None
RGVC610	RS_GCF_003435815.1	d__Bacteria;p__Firmicutes_A;c__Clostridia;o__Lachnospirales;f__Lachnospiraceae;g__CAG-317;s__CAG-317 sp000433215	blast	90.7	None
RGVC611	GB_GCA_900543755.1	d__Bacteria;p__Firmicutes_A;c__Clostridia_A;o__Christensenellales;f__CAG-552;g__UBA10677;s__UBA10677 sp900543755	blast	92.1	iPHoP-RF;62.20
RGVC613	GB_GCA_014174405.1	d__Bacteria;p__Firmicutes_A;c__Clostridia;o__Lachnospirales;f__Lachnospiraceae;g__Herbinix;s__Herbinix sp014174405	blast	90.4	None
RGVC615	3300029906_27	d__Bacteria;p__Firmicutes_A;c__Clostridia_A;o__Christensenellales;f__Borkfalkiaceae;g__UBA4636;s__	blast	93.2	None
RGVC615	GB_GCA_900555125.1	d__Bacteria;p__Firmicutes_A;c__Clostridia_A;o__Christensenellales;f__CAG-552;g__UMGS1795;s__UMGS1795 sp900555125	blast	90.8	None
RGVC615	3300018475_140	d__Bacteria;p__Firmicutes_A;c__Clostridia_A;o__Christensenellales;f__CAG-552;g__;s__	blast	90.3	None
RGVC617	3300019376_36	d__Bacteria;p__Firmicutes_A;c__Clostridia;o__Oscillospirales;f__CAG-272;g__;s__	blast	93.1	None
RGVC617	3300022401_4	d__Bacteria;p__Firmicutes_A;c__Clostridia;o__Oscillospirales;f__Acutalibacteraceae;g__RUG806;s__	blast	91.7	None
RGVC620	RS_GCF_000180035.1	d__Bacteria;p__Firmicutes;c__Bacilli;o__Lactobacillales;f__Streptococcaceae;g__Streptococcus;s__Streptococcus parasanguinis_C	blast	96.9	None
RGVC620	RS_GCF_000186445.1	d__Bacteria;p__Firmicutes;c__Bacilli;o__Lactobacillales;f__Streptococcaceae;g__Streptococcus;s__Streptococcus agalactiae	blast	96.9	None
RGVC620	RS_GCF_000215385.1	d__Bacteria;p__Firmicutes;c__Bacilli;o__Lactobacillales;f__Streptococcaceae;g__Streptococcus;s__Streptococcus infantis_B	blast	96.9	None
RGVC620	RS_GCF_000220045.1	d__Bacteria;p__Firmicutes;c__Bacilli;o__Lactobacillales;f__Streptococcaceae;g__Streptococcus;s__Streptococcus mitis_AP	blast	96.9	None
RGVC620	RS_GCF_000220085.1	d__Bacteria;p__Firmicutes;c__Bacilli;o__Lactobacillales;f__Streptococcaceae;g__Streptococcus;s__Streptococcus mitis_K	blast	96.9	None
RGVC620	RS_GCF_000222765.1	d__Bacteria;p__Firmicutes;c__Bacilli;o__Lactobacillales;f__Streptococcaceae;g__Streptococcus;s__Streptococcus cristatus	blast	96.9	None
RGVC620	RS_GCF_000223255.1	d__Bacteria;p__Firmicutes;c__Bacilli;o__Lactobacillales;f__Streptococcaceae;g__Streptococcus;s__Streptococcus infantis_G	blast	96.9	None
RGVC620	RS_GCF_000223335.1	d__Bacteria;p__Firmicutes;c__Bacilli;o__Lactobacillales;f__Streptococcaceae;g__Streptococcus;s__Streptococcus infantis_H	blast	96.9	None
RGVC620	RS_GCF_000279535.1	d__Bacteria;p__Firmicutes;c__Bacilli;o__Lactobacillales;f__Streptococcaceae;g__Streptococcus;s__Streptococcus infantis_I	blast	96.9	None
RGVC620	RS_GCF_000411475.1	d__Bacteria;p__Firmicutes;c__Bacilli;o__Lactobacillales;f__Streptococcaceae;g__Streptococcus;s__Streptococcus sp000411475	blast	96.9	None
RGVC620	RS_GCF_000722685.1	d__Bacteria;p__Firmicutes;c__Bacilli;o__Lactobacillales;f__Streptococcaceae;g__Streptococcus;s__Streptococcus mitis_M	blast	96.9	None
RGVC620	RS_GCF_000722775.1	d__Bacteria;p__Firmicutes;c__Bacilli;o__Lactobacillales;f__Streptococcaceae;g__Streptococcus;s__Streptococcus mitis_AV	blast	96.9	None
RGVC620	RS_GCF_000960085.1	d__Bacteria;p__Firmicutes;c__Bacilli;o__Lactobacillales;f__Streptococcaceae;g__Streptococcus;s__Streptococcus infantis_C	blast	96.9	None
RGVC620	RS_GCF_001073155.1	d__Bacteria;p__Firmicutes;c__Bacilli;o__Lactobacillales;f__Streptococcaceae;g__Streptococcus;s__Streptococcus parasanguinis_D	blast	96.9	None
RGVC620	RS_GCF_900095845.1	d__Bacteria;p__Firmicutes;c__Bacilli;o__Lactobacillales;f__Streptococcaceae;g__Streptococcus;s__Streptococcus timonensis	blast	96.6	None
RGVC621	3300026522_23	d__Bacteria;p__Firmicutes_A;c__Clostridia;o__Monoglobales_A;f__UBA1381;g__;s__	blast	91	None
RGVC622	3300022660_93	d__Bacteria;p__Bacteroidota;c__Bacteroidia;o__Bacteroidales;f__Rikenellaceae;g__Alistipes;s__	blast	92	iPHoP-RF;65.60
RGVC623	GB_GCA_900550745.1	d__Bacteria;p__Desulfobacterota;c__Desulfovibrionia;o__Desulfovibrionales;f__Desulfovibrionaceae;g__Bilophila;s__Bilophila sp900550745	blast	93.9	iPHoP-RF;82.20
RGVC623	GB_GCA_900553145.1	d__Bacteria;p__Desulfobacterota;c__Desulfovibrionia;o__Desulfovibrionales;f__Desulfovibrionaceae;g__Bilophila;s__Bilophila sp900553145	blast	91.7	iPHoP-RF;71.30
RGVC623	GB_GCA_902373525.1	d__Bacteria;p__Desulfobacterota;c__Desulfovibrionia;o__Desulfovibrionales;f__Desulfovibrionaceae;g__Bilophila;s__Bilophila sp902373525	blast	96.7	iPHoP-RF;56.80
RGVC623	RS_GCF_000701705.1	d__Bacteria;p__Desulfobacterota;c__Desulfovibrionia;o__Desulfovibrionales;f__Desulfovibrionaceae;g__Bilophila;s__Bilophila wadsworthia	blast	96.9	iPHoP-RF;74.60
RGVC625	3300022661_71	d__Bacteria;p__Firmicutes_A;c__Clostridia;o__Oscillospirales;f__Ruminococcaceae;g__;s__	blast	93	None
RGVC625	GB_GCA_000174895.1	d__Bacteria;p__Firmicutes_A;c__Clostridia;o__Oscillospirales;f__Ruminococcaceae;g__Ruminococcus;s__Ruminococcus flavefaciens_A	blast	90.6	iPHoP-RF;80.60
RGVC625	RS_GCF_000621785.1	d__Bacteria;p__Firmicutes_A;c__Clostridia;o__Oscillospirales;f__Ruminococcaceae;g__Ruminococcus;s__Ruminococcus flavefaciens_C	blast	90.3	iPHoP-RF;81.90
RGVC625	RS_GCF_000621845.1	d__Bacteria;p__Firmicutes_A;c__Clostridia;o__Oscillospirales;f__Ruminococcaceae;g__Ruminococcus;s__Ruminococcus flavefaciens_E	blast	90.2	iPHoP-RF;78.50
RGVC625	RS_GCF_900119075.1	d__Bacteria;p__Firmicutes_A;c__Clostridia;o__Oscillospirales;f__Ruminococcaceae;g__Ruminococcus;s__Ruminococcus flavefaciens_Q	blast	90.7	iPHoP-RF;83.30
RGVC626	3300027800_74	d__Bacteria;p__Firmicutes;c__Bacilli;o__RF39;f__UBA660;g__UBA5026;s__	blast	91.7	None
RGVC626	3300027719_55	d__Bacteria;p__Firmicutes;c__Bacilli;o__RF39;f__UBA660;g__UBA5026;s__	blast	90.7	None
RGVC629	GB_GCA_000434635.1	d__Bacteria;p__Firmicutes_A;c__Clostridia;o__Oscillospirales;f__Oscillospiraceae;g__CAG-110;s__CAG-110 sp000434635	blast	93	iPHoP-RF;64.30
RGVC629	GB_GCA_900763965.1	d__Bacteria;p__Firmicutes_A;c__Clostridia;o__Oscillospirales;f__Oscillospiraceae;g__CAG-110;s__CAG-110 sp900763965	blast	91.3	iPHoP-RF;62.20
RGVC629	GB_GCA_900769835.1	d__Bacteria;p__Firmicutes_A;c__Clostridia;o__Oscillospirales;f__Oscillospiraceae;g__CAG-110;s__CAG-110 sp900769835	blast	92	None
[truncated: 71,227 more rows]

## Sheet: Table S29
Table S29: Results of host prediction to genus by iPHoP
vOTUs	AAI-to-closest-RaFAH-reference	Host-genus	Confidence-score	List-of-methods
RGVC2	32.68	d__Bacteria;p__Actinobacteriota;c__Actinomycetia;o__Streptomycetales;f__Streptomycetaceae;g__Streptomyces	95.4	blast;96.80
RGVC5	15.26	d__Bacteria;p__Firmicutes_A;c__Clostridia_A;o__Christensenellales;f__CAG-74;g__Firm-11	91.5	blast;93.80
RGVC8	26.73	d__Bacteria;p__Firmicutes_A;c__Clostridia;o__Oscillospirales;f__Oscillospiraceae;g__Lawsonibacter	91.6	blast;93.90
RGVC8	26.73	d__Bacteria;p__Firmicutes_A;c__Clostridia;o__Oscillospirales;f__Oscillospiraceae;g__Dysosmobacter	90.7	RaFAH;85.20 blast;76.70
RGVC15	30.28	d__Bacteria;p__Firmicutes_A;c__Clostridia;o__Oscillospirales;f__Oscillospiraceae;g__Dysosmobacter	91.1	blast;93.50 iPHoP-RF;84.80
RGVC16	54.94	d__Bacteria;p__Proteobacteria;c__Alphaproteobacteria;o__RF32;f__CAG-239;g__CAG-495	95.6	blast;96.90 iPHoP-RF;56.50
RGVC17	21.19	d__Bacteria;p__Firmicutes_A;c__Clostridia;o__Oscillospirales;f__Acutalibacteraceae;g__	90.6	blast;93.00 iPHoP-RF;73.00
RGVC20	5.95	d__Bacteria;p__Firmicutes_A;c__Clostridia;o__Oscillospirales;f__Oscillospiraceae;g__Dysosmobacter	91.6	blast;93.90 iPHoP-RF;71.50
RGVC24	27.73	d__Bacteria;p__Firmicutes_A;c__Clostridia;o__Oscillospirales;f__Oscillospiraceae;g__Dysosmobacter	90.4	blast;92.90 iPHoP-RF;71.10
RGVC27	27.27	d__Bacteria;p__Firmicutes_A;c__Clostridia;o__Oscillospirales;f__Acutalibacteraceae;g__UBA1417	90.6	blast;93.00 iPHoP-RF;68.40
RGVC29	8.78	d__Bacteria;p__Firmicutes_A;c__Clostridia;o__Oscillospirales;f__Oscillospiraceae;g__Lawsonibacter	90.2	blast;92.70 iPHoP-RF;83.90
RGVC32	19.49	d__Bacteria;p__Firmicutes;c__Bacilli;o__Lactobacillales;f__Streptococcaceae;g__Streptococcus	95.6	blast;96.90
RGVC33	14.09	d__Bacteria;p__Firmicutes_A;c__Clostridia;o__Oscillospirales;f__Oscillospiraceae;g__CAG-110	91.5	blast;93.80 iPHoP-RF;59.50
RGVC34	16.46	d__Bacteria;p__Desulfobacterota;c__Desulfovibrionia;o__Desulfovibrionales;f__Desulfovibrionaceae;g__Bilophila	92.6	blast;94.70 iPHoP-RF;64.50
RGVC36	54.72	d__Bacteria;p__Bacteroidota;c__Bacteroidia;o__Bacteroidales;f__Rikenellaceae;g__Alistipes	95.2	blast;96.60 iPHoP-RF;91.10
RGVC41	93.74	d__Bacteria;p__Proteobacteria;c__Gammaproteobacteria;o__Enterobacterales;f__Enterobacteriaceae;g__Escherichia	100	RaFAH;97.60 iPHoP-RF;97.10 blast;96.90 CRISPR;56.40
RGVC42	46.77	d__Bacteria;p__Firmicutes_A;c__Clostridia;o__Oscillospirales;f__Acutalibacteraceae;g__UBA737	95.2	blast;96.60
RGVC45	40.84	d__Bacteria;p__Bacteroidota;c__Bacteroidia;o__Bacteroidales;f__Barnesiellaceae;g__Barnesiella	92.6	RaFAH;94.70
RGVC48	10.82	d__Bacteria;p__Firmicutes_A;c__Clostridia;o__Oscillospirales;f__Ruminococcaceae;g__Ruminococcus	91.6	blast;93.90 iPHoP-RF;78.50
RGVC49	28.01	d__Bacteria;p__Firmicutes_A;c__Clostridia;o__Oscillospirales;f__Oscillospiraceae;g__Intestinimonas	91.6	blast;93.90
RGVC51	33.95	d__Bacteria;p__Firmicutes_A;c__Clostridia;o__Oscillospirales;f__Oscillospiraceae;g__CAG-110	95.6	blast;96.90 iPHoP-RF;68.20
RGVC52	13.48	d__Bacteria;p__Firmicutes_A;c__Clostridia;o__Lachnospirales;f__Lachnospiraceae;g__RUG191	91.1	blast;93.50 iPHoP-RF;59.20
RGVC53	13.23	d__Bacteria;p__Firmicutes_A;c__Clostridia;o__Oscillospirales;f__Oscillospiraceae;g__Dysosmobacter	90.2	blast;92.70
RGVC55	10.87	d__Bacteria;p__Firmicutes_A;c__Clostridia;o__Oscillospirales;f__Acutalibacteraceae;g__Clostridium_A	91	blast;93.40
RGVC57	12.81	d__Bacteria;p__Firmicutes_A;c__Clostridia;o__Oscillospirales;f__Oscillospiraceae;g__	90.7	blast;93.10
RGVC61	9.76	d__Bacteria;p__Firmicutes_A;c__Clostridia;o__Oscillospirales;f__Oscillospiraceae;g__Dysosmobacter	91.4	blast;93.70 iPHoP-RF;78.30
RGVC63	17.5	d__Bacteria;p__Actinobacteriota;c__Actinomycetia;o__Streptomycetales;f__Streptomycetaceae;g__Streptomyces	95.6	blast;96.90
RGVC64	32.49	d__Bacteria;p__Firmicutes_A;c__Clostridia_A;o__Christensenellales;f__CAG-74;g__Firm-11	95.6	blast;96.90 iPHoP-RF;54.90
RGVC65	33.95	d__Bacteria;p__Firmicutes_A;c__Clostridia;o__Oscillospirales;f__Oscillospiraceae;g__NSJ-62	90.3	blast;92.80
RGVC66	34.48	d__Bacteria;p__Firmicutes_A;c__Clostridia;o__Oscillospirales;f__Oscillospiraceae;g__CAG-170	95.6	blast;96.90 iPHoP-RF;87.30
RGVC67	4.23	d__Bacteria;p__Firmicutes_A;c__Clostridia;o__Oscillospirales;f__Oscillospiraceae;g__UBA1777	91.6	blast;93.90
RGVC68	10.16	d__Bacteria;p__Firmicutes_C;c__Negativicutes;o__Acidaminococcales;f__Acidaminococcaceae;g__Acidaminococcus	97.9	CRISPR;98.50 blast;96.90 iPHoP-RF;83.30
RGVC74	32.09	d__Bacteria;p__Firmicutes_A;c__Clostridia;o__Lachnospirales;f__Lachnospiraceae;g__Roseburia	90	blast;92.50 iPHoP-RF;65.10
RGVC75	10.37	d__Bacteria;p__Firmicutes_A;c__Clostridia;o__Oscillospirales;f__Oscillospiraceae;g__CAG-110	91.1	blast;93.50
RGVC76	53.98	d__Bacteria;p__Bacteroidota;c__Bacteroidia;o__Bacteroidales;f__Rikenellaceae;g__Alistipes	95.6	blast;96.90
RGVC77	16.37	d__Bacteria;p__Firmicutes_A;c__Clostridia_A;o__Christensenellales;f__CAG-74;g__Firm-11	95.3	blast;96.70
RGVC77	16.37	d__Bacteria;p__Firmicutes_A;c__Clostridia;o__Oscillospirales;f__Oscillospiraceae;g__CAG-83	93.6	blast;95.50
RGVC79	19.24	d__Bacteria;p__Firmicutes_A;c__Clostridia;o__Oscillospirales;f__Oscillospiraceae;g__CAG-170	91.4	blast;93.70
RGVC81	10.19	d__Bacteria;p__Firmicutes_A;c__Clostridia;o__Oscillospirales;f__CAG-272;g__UMGS1696	90	blast;92.50
RGVC83	38.87	d__Bacteria;p__Firmicutes_A;c__Clostridia;o__Oscillospirales;f__Oscillospiraceae;g__Dysosmobacter	99.6	blast;96.90 RaFAH;94.20 iPHoP-RF;68.60
RGVC83	38.87	d__Bacteria;p__Firmicutes_A;c__Clostridia;o__Oscillospirales;f__Oscillospiraceae;g__CAG-83	93.6	RaFAH;94.20 iPHoP-RF;61.40
RGVC84	33.83	d__Bacteria;p__Firmicutes;c__Bacilli;o__Lactobacillales;f__Streptococcaceae;g__Streptococcus	90.4	blast;92.90
RGVC85	31.3	d__Bacteria;p__Firmicutes_A;c__Clostridia;o__Oscillospirales;f__Oscillospiraceae;g__CAG-170	90.4	blast;92.90
RGVC87	16.66	d__Bacteria;p__Firmicutes_A;c__Clostridia;o__Oscillospirales;f__Oscillospiraceae;g__CAG-170	95.6	blast;96.90 iPHoP-RF;90.50
RGVC88	98.4	d__Bacteria;p__Proteobacteria;c__Gammaproteobacteria;o__Enterobacterales;f__Enterobacteriaceae;g__Escherichia	98.1	blast;96.90 iPHoP-RF;86.70 RaFAH;77.70
RGVC89	29.19	d__Bacteria;p__Firmicutes;c__Bacilli;o__RF39;f__UBA660;g__CAG-533	91.2	blast;93.60 iPHoP-RF;67.00
RGVC90	10.15	d__Bacteria;p__Firmicutes_A;c__Clostridia;o__TANB77;f__CAG-508;g__CAG-269	90.6	blast;93.00
RGVC92	31.04	d__Bacteria;p__Firmicutes_A;c__Clostridia;o__Oscillospirales;f__Acutalibacteraceae;g__DTU089	90.3	blast;92.80 iPHoP-RF;55.70
RGVC94	37.45	d__Bacteria;p__Firmicutes_A;c__Clostridia;o__Lachnospirales;f__Lachnospiraceae;g__Blautia_A	91.6	blast;93.90 iPHoP-RF;85.40
RGVC96	15.51	d__Bacteria;p__Firmicutes;c__Bacilli;o__RF39;f__UBA660;g__CAG-302	95	blast;96.50
RGVC98	22.78	d__Bacteria;p__Firmicutes_A;c__Clostridia;o__Oscillospirales;f__Oscillospiraceae;g__CAG-83	95.6	blast;96.90 iPHoP-RF;93.70
RGVC100	41.31	d__Bacteria;p__Firmicutes_A;c__Clostridia;o__Lachnospirales;f__Lachnospiraceae;g__Acetatifactor	95.6	blast;96.90 iPHoP-RF;84.50
RGVC104	20.46	d__Bacteria;p__Firmicutes_A;c__Clostridia;o__Oscillospirales;f__Oscillospiraceae;g__UMGS1872	90.2	blast;92.70
RGVC104	20.46	d__Bacteria;p__Firmicutes_A;c__Clostridia;o__Oscillospirales;f__Oscillospiraceae;g__Flavonifractor	90.1	blast;92.60 iPHoP-RF;63.80
RGVC106	40.32	d__Bacteria;p__Firmicutes_A;c__Clostridia_A;o__Christensenellales;f__Christensenellaceae;g__NSJ-63	90.2	blast;92.70 iPHoP-RF;50.90
RGVC107	24.89	d__Bacteria;p__Firmicutes;c__Bacilli;o__RF39;f__UBA660;g__CAG-877	90	blast;92.50
RGVC112	37.68	d__Bacteria;p__Firmicutes_A;c__Clostridia;o__Oscillospirales;f__Acutalibacteraceae;g__UBA1417	95.6	blast;96.90 iPHoP-RF;65.80
RGVC113	21.35	d__Bacteria;p__Firmicutes_B;c__Peptococcia;o__Peptococcales;f__Peptococcaceae;g__UBA7185	95	blast;96.50 iPHoP-RF;65.30
RGVC116	25.86	d__Bacteria;p__Bacteroidota;c__Bacteroidia;o__Bacteroidales;f__UBA932;g__RC9	94.9	blast;96.40 iPHoP-RF;60.10
RGVC117	35.73	d__Bacteria;p__Firmicutes_A;c__Clostridia;o__Oscillospirales;f__Oscillospiraceae;g__ER4	91.2	blast;93.60 iPHoP-RF;65.30
RGVC118	24.8	d__Bacteria;p__Firmicutes;c__Bacilli;o__RF39;f__UBA660;g__CAG-611	91.6	blast;93.90
RGVC121	79.27	d__Bacteria;p__Spirochaetota;c__Spirochaetia;o__Treponematales;f__Treponemataceae;g__Treponema_D	92	blast;94.20 iPHoP-RF;70.20
RGVC127	25	d__Bacteria;p__Firmicutes_A;c__Clostridia;o__Monoglobales;f__Monoglobaceae;g__UMGS1820	93.6	blast;95.50
RGVC133	25.56	d__Bacteria;p__Firmicutes_A;c__Clostridia;o__Oscillospirales;f__Oscillospiraceae;g__CAG-110	95.6	blast;96.90 iPHoP-RF;74.10
RGVC134	15.8	d__Bacteria;p__Firmicutes_A;c__Clostridia;o__Oscillospirales;f__Ruminococcaceae;g__Faecalibacterium	90.2	blast;92.70
RGVC145	29.91	d__Bacteria;p__Firmicutes_A;c__Clostridia_A;o__Christensenellales;f__CAG-74;g__Firm-10	91.4	blast;93.70
RGVC149	2.36	d__Bacteria;p__Firmicutes_A;c__Clostridia;o__Oscillospirales;f__Acutalibacteraceae;g__UBA737	92.2	blast;94.40 iPHoP-RF;70.40
RGVC152	49.6	d__Bacteria;p__Firmicutes_A;c__Clostridia;o__Oscillospirales;f__CAG-272;g__	95.2	blast;96.60
RGVC158	3.81	d__Bacteria;p__Proteobacteria;c__Gammaproteobacteria;o__Francisellales;f__Francisellaceae;g__Francisella	90.7	iPHoP-RF;93.10
RGVC160	22.93	d__Bacteria;p__Firmicutes_A;c__Clostridia;o__Oscillospirales;f__Oscillospiraceae;g__CAG-170	95.6	blast;96.90 iPHoP-RF;83.90
RGVC164	22.02	d__Bacteria;p__Firmicutes_A;c__Clostridia;o__Oscillospirales;f__Oscillospiraceae;g__CAG-110	91.5	blast;93.80 iPHoP-RF;85.40 CRISPR;50.00
RGVC165	28.67	d__Bacteria;p__Firmicutes_A;c__Clostridia_A;o__Christensenellales;f__CAG-74;g__Firm-11	95.6	blast;96.90 iPHoP-RF;64.30
RGVC173	27.53	d__Bacteria;p__Firmicutes_A;c__Clostridia_A;o__Christensenellales;f__CAG-74;g__UBA11524	90.8	blast;93.20 iPHoP-RF;76.60
RGVC173	27.53	d__Bacteria;p__Firmicutes_A;c__Clostridia_A;o__Christensenellales;f__CAG-74;g__Firm-11	90.6	blast;93.00 iPHoP-RF;60.90
RGVC174	14.14	d__Bacteria;p__Firmicutes_A;c__Clostridia;o__Oscillospirales;f__Oscillospiraceae;g__CAG-110	94.5	blast;96.10 iPHoP-RF;66.00
RGVC174	14.14	d__Bacteria;p__Firmicutes_A;c__Clostridia;o__Oscillospirales;f__Oscillospiraceae;g__UBA1777	91.4	blast;93.70 iPHoP-RF;89.80
RGVC176	3	d__Bacteria;p__Firmicutes_A;c__Clostridia;o__Oscillospirales;f__Oscillospiraceae;g__Dysosmobacter	91.1	blast;93.50 iPHoP-RF;67.50
RGVC178	11.48	d__Bacteria;p__Firmicutes_A;c__Clostridia;o__Lachnospirales;f__Lachnospiraceae;g__Blautia	90.1	blast;92.60 iPHoP-RF;71.10
RGVC182	21.82	d__Bacteria;p__Firmicutes_A;c__Clostridia;o__Oscillospirales;f__Oscillospiraceae;g__Lawsonibacter	91	blast;93.40 iPHoP-RF;65.80
RGVC184	21.69	d__Bacteria;p__Firmicutes_A;c__Clostridia;o__Oscillospirales;f__Oscillospiraceae;g__CAG-110	91.1	blast;93.50 iPHoP-RF;72.40
RGVC185	13.77	d__Bacteria;p__Firmicutes_A;c__Clostridia_A;o__Christensenellales;f__CAG-552;g__UBA10677	91.6	blast;93.90
RGVC186	34.98	d__Bacteria;p__Firmicutes_B;c__Dehalobacteriia;o__UBA7702;f__UBA7702;g__UBA7702	92.7	blast;94.80 iPHoP-RF;65.80
RGVC187	4	d__Bacteria;p__Firmicutes_C;c__Negativicutes;o__Selenomonadales;f__Selenomonadaceae;g__Selenomonas_A	90.8	blast;93.20
RGVC189	33.57	d__Bacteria;p__Firmicutes_A;c__Clostridia;o__Oscillospirales;f__Oscillospiraceae;g__Dysosmobacter	90.8	blast;93.20 iPHoP-RF;56.80
RGVC191	19.14	d__Bacteria;p__Proteobacteria;c__Alphaproteobacteria;o__RF32;f__CAG-239;g__CAG-495	95.6	blast;96.90 iPHoP-RF;54.60
RGVC193	50.16	d__Bacteria;p__Firmicutes_A;c__Clostridia;o__Oscillospirales;f__Oscillospiraceae;g__CAG-110	91.4	blast;93.70 iPHoP-RF;86.30
RGVC194	39.51	d__Bacteria;p__Firmicutes;c__Bacilli;o__Erysipelotrichales;f__Erysipelotrichaceae;g__Traorella	90.4	blast;92.90
RGVC199	10.99	d__Bacteria;p__Firmicutes_A;c__Clostridia_A;o__Christensenellales;f__CAG-74;g__SFTH01	91.6	blast;93.90
RGVC202	25.17	d__Bacteria;p__Firmicutes_A;c__Clostridia;o__Monoglobales_A;f__UBA9506;g__UBA9506	91.2	blast;93.60 iPHoP-RF;81.60
RGVC203	20.09	d__Bacteria;p__Bacteroidota;c__Bacteroidia;o__Bacteroidales;f__Bacteroidaceae;g__HGM04593	93.6	blast;95.50 iPHoP-RF;80.00
RGVC205	32.49	d__Bacteria;p__Firmicutes_A;c__Clostridia;o__Oscillospirales;f__Oscillospiraceae;g__Lawsonibacter	91	blast;93.40 iPHoP-RF;58.70
RGVC207	63.01	d__Bacteria;p__Bacteroidota;c__Bacteroidia;o__Bacteroidales;f__UBA11471;g__UBA11471	90.6	blast;93.00 iPHoP-RF;79.50
RGVC209	33.05	d__Bacteria;p__Firmicutes_A;c__Clostridia;o__Oscillospirales;f__Oscillospiraceae;g__CAG-110	95.6	blast;96.90 iPHoP-RF;83.90
RGVC210	56.87	d__Bacteria;p__Bacteroidota;c__Bacteroidia;o__Flavobacteriales;f__UBA1820;g__UBA1820	91.4	blast;93.70 iPHoP-RF;60.30
RGVC212	12.09	d__Bacteria;p__Actinobacteriota;c__Actinomycetia;o__Streptomycetales;f__Streptomycetaceae;g__Streptomyces	95.6	blast;96.90
RGVC217	25.37	d__Bacteria;p__Firmicutes_A;c__Clostridia;o__Oscillospirales;f__Oscillospiraceae;g__CAG-110	95.3	blast;96.70 iPHoP-RF;75.90
RGVC219	11.32	d__Bacteria;p__Patescibacteria;c__Paceibacteria;o__UBA9983_A;f__UBA2163;g__	90.3	iPHoP-RF;92.80
RGVC221	7.83	d__Bacteria;p__Firmicutes_A;c__Clostridia;o__Oscillospirales;f__Acutalibacteraceae;g__CAG-180	90.4	blast;92.90
RGVC223	33.71	d__Bacteria;p__Firmicutes_A;c__Clostridia;o__Oscillospirales;f__CAG-272;g__UMGS874	95	blast;96.50
RGVC225	4	d__Bacteria;p__Firmicutes_A;c__Clostridia_A;o__Christensenellales;f__CAG-917;g__CAG-475	93.8	blast;95.60 iPHoP-RF;89.80
RGVC226	10.62	d__Bacteria;p__Firmicutes_A;c__Clostridia_A;o__Christensenellales;f__CAG-74;g__Firm-11	92.6	blast;94.70 iPHoP-RF;63.80
RGVC229	13.06	d__Bacteria;p__Bacteroidota;c__Bacteroidia;o__Bacteroidales;f__Bacteroidaceae;g__Prevotella	90.8	blast;93.20 iPHoP-RF;65.80
RGVC230	30.45	d__Bacteria;p__Firmicutes;c__Bacilli;o__RF39;f__UBA660;g__UBA3789	91.4	blast;93.70 iPHoP-RF;67.00
RGVC236	24.58	d__Bacteria;p__Bacteroidota;c__Bacteroidia;o__Bacteroidales;f__Rikenellaceae;g__Alistipes	91.5	blast;93.80 iPHoP-RF;75.00 CRISPR;54.70
RGVC240	14.25	d__Bacteria;p__Bacteroidota;c__Bacteroidia;o__Bacteroidales;f__Bacteroidaceae;g__Bacteroides	96.2	iPHoP-RF;92.80 blast;89.60 RaFAH;81.50
RGVC240	14.25	d__Bacteria;p__Bacteroidota;c__Bacteroidia;o__Bacteroidales;f__Bacteroidaceae;g__Phocaeicola	95.6	blast;96.90 iPHoP-RF;83.60
RGVC243	8.16	d__Bacteria;p__Firmicutes_A;c__Clostridia;o__Oscillospirales;f__Oscillospiraceae;g__	92.1	blast;94.30 iPHoP-RF;67.70
RGVC245	36.91	d__Bacteria;p__Firmicutes_A;c__Clostridia;o__Oscillospirales;f__Oscillospiraceae;g__CAG-170	90.9	blast;93.30 iPHoP-RF;65.10
RGVC246	6.97	d__Bacteria;p__Firmicutes_A;c__Clostridia;o__Oscillospirales;f__Butyricicoccaceae;g__Agathobaculum	91.4	blast;93.70 iPHoP-RF;60.10
RGVC249	37.02	d__Bacteria;p__Firmicutes_A;c__Clostridia_A;o__Christensenellales;f__CAG-138;g__UBA1685	95.6	blast;96.90
RGVC250	7.97	d__Bacteria;p__Firmicutes_A;c__Clostridia_A;o__Christensenellales;f__CAG-74;g__SFFH01	95.6	blast;96.90
RGVC253	64.86	d__Bacteria;p__Firmicutes_C;c__Negativicutes;o__Acidaminococcales;f__Acidaminococcaceae;g__Acidaminococcus	95	blast;96.50 iPHoP-RF;79.30
RGVC257	13.56	d__Bacteria;p__Bacteroidota;c__Bacteroidia;o__Bacteroidales;f__Muribaculaceae;g__CAG-485	92.7	blast;94.80 iPHoP-RF;60.90
RGVC268	60.42	d__Bacteria;p__Bacteroidota;c__Bacteroidia;o__Bacteroidales;f__Bacteroidaceae;g__Bacteroides	99.6	RaFAH;93.30 iPHoP-RF;92.80 blast;79.20
RGVC268	60.42	d__Bacteria;p__Bacteroidota;c__Bacteroidia;o__Bacteroidales;f__UBA11471;g__UBA11471	94.9	iPHoP-RF;96.40 blast;92.20
RGVC268	60.42	d__Bacteria;p__Bacteroidota;c__Bacteroidia;o__Bacteroidales;f__Coprobacteraceae;g__Coprobacter	93.5	iPHoP-RF;95.40 blast;90.50
RGVC270	56.74	d__Bacteria;p__Firmicutes_A;c__Clostridia;o__Oscillospirales;f__Oscillospiraceae;g__An92	90.2	blast;92.70
RGVC271	36.19	d__Bacteria;p__Firmicutes_A;c__Clostridia;o__Lachnospirales;f__Lachnospiraceae;g__Roseburia	90.3	blast;92.80
RGVC272	19.17	d__Bacteria;p__Actinobacteriota;c__Actinomycetia;o__Streptomycetales;f__Streptomycetaceae;g__Streptomyces	95.4	blast;96.80
RGVC276	32.49	d__Bacteria;p__Firmicutes_A;c__Clostridia;o__Oscillospirales;f__Acutalibacteraceae;g__CAG-488	95.6	blast;96.90 iPHoP-RF;57.60
RGVC277	28.52	d__Bacteria;p__Bacteroidota;c__Bacteroidia;o__Bacteroidales;f__Rikenellaceae;g__Alistipes	93.1	blast;95.10 iPHoP-RF;79.50
RGVC277	28.52	d__Bacteria;p__Bacteroidota;c__Bacteroidia;o__Bacteroidales;f__Bacteroidaceae;g__Bacteroides	91.7	RaFAH;94.00
RGVC278	34.67	d__Bacteria;p__Firmicutes_A;c__Clostridia_A;o__Christensenellales;f__CAG-74;g__Firm-11	93.4	blast;95.30 iPHoP-RF;71.90
RGVC282	34.71	d__Bacteria;p__Firmicutes_A;c__Clostridia;o__Oscillospirales;f__Oscillospiraceae;g__CAG-110	90.8	blast;93.20 iPHoP-RF;80.00
RGVC284	7.08	d__Bacteria;p__Firmicutes_A;c__Clostridia;o__Oscillospirales;f__Oscillospiraceae;g__	94.7	blast;96.30 iPHoP-RF;68.90
RGVC285	33.54	d__Bacteria;p__Firmicutes_A;c__Clostridia_A;o__Christensenellales;f__CAG-138;g__UBA1685	95.6	blast;96.90
RGVC289	25.83	d__Bacteria;p__Firmicutes_A;c__Clostridia;o__Monoglobales_A;f__UBA1381;g__UBA4716	91	blast;93.40 iPHoP-RF;59.20
RGVC296	5.53	d__Bacteria;p__Firmicutes_A;c__Clostridia;o__Oscillospirales;f__Oscillospiraceae;g__CAG-170	92.9	blast;94.90 iPHoP-RF;75.70
RGVC303	41.39	d__Bacteria;p__Bacteroidota;c__Bacteroidia;o__Bacteroidales;f__Bacteroidaceae;g__Phocaeicola	98.1	CRISPR;98.60 iPHoP-RF;84.50
RGVC303	41.39	d__Bacteria;p__Bacteroidota;c__Bacteroidia;o__Bacteroidales;f__Bacteroidaceae;g__Bacteroides	97.6	CRISPR;97.00 blast;96.90 iPHoP-RF;95.40 RaFAH;72.30
RGVC305	58.76	d__Bacteria;p__Firmicutes_A;c__Clostridia;o__Lachnospirales;f__Lachnospiraceae;g__CAG-95	90.1	blast;92.60
RGVC306	24.34	d__Bacteria;p__Firmicutes;c__Bacilli;o__RF39;f__UBA660;g__CAG-302	95.4	blast;96.80
RGVC307	43.12	d__Bacteria;p__Bacteroidota;c__Bacteroidia;o__Bacteroidales;f__Bacteroidaceae;g__Bacteroides	96.7	iPHoP-RF;96.70 blast;92.60 RaFAH;65.80
RGVC307	43.12	d__Bacteria;p__Bacteroidota;c__Bacteroidia;o__Bacteroidales;f__Bacteroidaceae;g__Phocaeicola	95.4	blast;96.80 iPHoP-RF;88.20
RGVC310	1.93	d__Bacteria;p__Bacteroidota;c__Bacteroidia;o__Flavobacteriales;f__Flavobacteriaceae;g__Flaviramulus_A	92.6	iPHoP-RF;94.70
RGVC311	17.85	d__Bacteria;p__Bacteroidota;c__Bacteroidia;o__Bacteroidales;f__Rikenellaceae;g__Alistipes	95.6	blast;96.90 iPHoP-RF;58.70
RGVC312	17.15	d__Bacteria;p__Firmicutes_A;c__Clostridia;o__Oscillospirales;f__Butyricicoccaceae;g__UBA4644	91.6	blast;93.90
RGVC314	4.03	d__Bacteria;p__Firmicutes_A;c__Clostridia_A;o__Christensenellales;f__CAG-917;g__CAG-475	94.5	blast;96.10 iPHoP-RF;84.50
RGVC317	59.07	d__Bacteria;p__Firmicutes_A;c__Clostridia;o__Oscillospirales;f__;g__	95.6	blast;96.90 iPHoP-RF;69.30
RGVC318	56.38	d__Bacteria;p__Firmicutes_A;c__Clostridia;o__Oscillospirales;f__Oscillospiraceae;g__CAG-83	92.7	blast;90.90 RaFAH;71.20 iPHoP-RF;50.70
RGVC319	46.7	d__Bacteria;p__Firmicutes_A;c__Clostridia;o__Lachnospirales;f__Lachnospiraceae;g__Blautia_A	91.4	blast;93.70 CRISPR;92.60 iPHoP-RF;85.10
RGVC321	11.93	d__Bacteria;p__Actinobacteriota;c__Actinomycetia;o__Streptomycetales;f__Streptomycetaceae;g__Streptomyces	94.3	blast;96.00
RGVC321	11.93	d__Bacteria;p__Firmicutes_A;c__Clostridia;o__Oscillospirales;f__Oscillospiraceae;g__Lawsonibacter	91.6	blast;93.90
RGVC322	12.74	d__Bacteria;p__Firmicutes_A;c__Clostridia;o__Oscillospirales;f__Oscillospiraceae;g__Dysosmobacter	91.4	blast;93.70 iPHoP-RF;82.80
RGVC326	70.04	d__Bacteria;p__Firmicutes_A;c__Clostridia;o__Oscillospirales;f__Oscillospiraceae;g__Dysosmobacter	95.6	blast;96.90 iPHoP-RF;79.00
RGVC329	7.29	d__Bacteria;p__Firmicutes_A;c__Clostridia;o__Oscillospirales;f__Oscillospiraceae;g__CAG-110	91.4	blast;93.70 iPHoP-RF;50.40
RGVC332	21.44	d__Bacteria;p__Firmicutes;c__Bacilli;o__;f__Bacillaceae_G;g__Bacillus_A	91.2	blast;93.60
RGVC333	23.84	d__Bacteria;p__Firmicutes_A;c__Clostridia_A;o__Christensenellales;f__CAG-74;g__SFTH01	90.4	blast;92.90 iPHoP-RF;71.70
RGVC343	14.35	d__Bacteria;p__Bacteroidota;c__Bacteroidia;o__Bacteroidales;f__Bacteroidaceae;g__HGM04593	94.5	iPHoP-RF;96.10 blast;93.70
RGVC343	14.35	d__Bacteria;p__Bacteroidota;c__Bacteroidia;o__Bacteroidales;f__Bacteroidaceae;g__	91.6	blast;93.90 iPHoP-RF;92.80
RGVC344	11.09	d__Bacteria;p__Bacteroidota;c__Bacteroidia;o__Bacteroidales;f__Rikenellaceae;g__Alistipes	91.1	blast;93.50 iPHoP-RF;87.30 CRISPR;54.70
RGVC345	14.88	d__Bacteria;p__Bacteroidota;c__Bacteroidia;o__Bacteroidales;f__UBA932;g__RC9	95.2	blast;96.60 iPHoP-RF;82.20
RGVC345	14.88	d__Bacteria;p__Bacteroidota;c__Bacteroidia;o__Bacteroidales;f__Bacteroidaceae;g__Bacteroides	92.3	blast;88.70 RaFAH;75.50
RGVC348	26.3	d__Bacteria;p__Firmicutes_A;c__Clostridia;o__Oscillospirales;f__Oscillospiraceae;g__Dysosmobacter	90.4	blast;92.90
RGVC351	11.42	d__Bacteria;p__Firmicutes_A;c__Clostridia;o__Oscillospirales;f__Oscillospiraceae;g__Lawsonibacter	91.1	blast;93.50
RGVC353	13.75	d__Bacteria;p__Firmicutes_A;c__Clostridia;o__HGM11514;f__HGM11514;g__HGM11514	91	blast;93.40 iPHoP-RF;61.10
RGVC358	27.39	d__Bacteria;p__Firmicutes_A;c__Clostridia;o__Oscillospirales;f__Oscillospiraceae;g__Flavonifractor	90.8	blast;93.20 iPHoP-RF;63.50
RGVC361	21.36	d__Bacteria;p__Firmicutes_A;c__Clostridia;o__Oscillospirales;f__Oscillospiraceae;g__CAG-110	91.4	blast;93.70 iPHoP-RF;57.60
RGVC363	6.18	d__Bacteria;p__Firmicutes_A;c__Clostridia;o__Oscillospirales;f__Oscillospiraceae;g__CAG-110	95.3	blast;96.70
RGVC364	15.7	d__Bacteria;p__Verrucomicrobiota;c__Verrucomicrobiae;o__Opitutales;f__CAG-312;g__CAG-312	95	blast;96.50 iPHoP-RF;75.40
RGVC367	47.6	d__Bacteria;p__Bacteroidota;c__Bacteroidia;o__Bacteroidales;f__Bacteroidaceae;g__HGM04593	93.4	blast;95.30 iPHoP-RF;81.90
RGVC367	47.6	d__Bacteria;p__Bacteroidota;c__Bacteroidia;o__Bacteroidales;f__Bacteroidaceae;g__	91.8	iPHoP-RF;94.10 blast;92.10
RGVC368	27.6	d__Bacteria;p__Firmicutes_A;c__Clostridia;o__Oscillospirales;f__Oscillospiraceae;g__CAG-170	95.6	blast;96.90 iPHoP-RF;83.30
RGVC371	46.73	d__Bacteria;p__Firmicutes_A;c__Clostridia;o__Oscillospirales;f__Acutalibacteraceae;g__Marseille-P4683	91.6	blast;93.90 iPHoP-RF;50.20
RGVC372	10.19	d__Bacteria;p__Bacteroidota;c__Bacteroidia;o__Bacteroidales;f__Rikenellaceae;g__Alistipes	95.6	blast;96.90 iPHoP-RF;71.30
RGVC376	95.24	d__Bacteria;p__Proteobacteria;c__Gammaproteobacteria;o__Enterobacterales;f__Enterobacteriaceae;g__Escherichia	100	RaFAH;99.10 iPHoP-RF;97.10 blast;96.90
RGVC378	47.87	d__Bacteria;p__Proteobacteria;c__Gammaproteobacteria;o__Enterobacterales;f__Enterobacteriaceae;g__Escherichia	99.7	blast;96.80 iPHoP-RF;96.40 RaFAH;95.40
RGVC383	31.82	d__Bacteria;p__Firmicutes_A;c__Clostridia;o__Oscillospirales;f__Oscillospiraceae;g__CAG-110	95.6	blast;96.90 iPHoP-RF;73.70
RGVC384	9.03	d__Bacteria;p__Bacteroidota;c__Bacteroidia;o__Bacteroidales;f__Bacteroidaceae;g__Prevotella	93	blast;95.00 iPHoP-RF;87.00
RGVC386	18.51	d__Bacteria;p__Firmicutes_A;c__Clostridia;o__Lachnospirales;f__Lachnospiraceae;g__Acetatifactor	95.2	blast;96.60 iPHoP-RF;85.10
RGVC389	14.83	d__Bacteria;p__Bacteroidota;c__Bacteroidia;o__Bacteroidales;f__Tannerellaceae;g__Parabacteroides	95.6	blast;96.90 CRISPR;95.80 iPHoP-RF;95.10
RGVC390	13.99	d__Bacteria;p__Firmicutes_A;c__Clostridia;o__Oscillospirales;f__Oscillospiraceae;g__CAG-83	95.4	blast;96.80 iPHoP-RF;91.10
RGVC393	19.78	d__Bacteria;p__Bacteroidota;c__Bacteroidia;o__Bacteroidales;f__Bacteroidaceae;g__Prevotella	95.4	blast;96.80 CRISPR;94.00 iPHoP-RF;70.40
RGVC394	22.43	d__Bacteria;p__Firmicutes_A;c__Clostridia;o__Oscillospirales;f__Oscillospiraceae;g__CAG-110	94.9	blast;96.40 iPHoP-RF;84.20
RGVC395	21.81	d__Bacteria;p__Firmicutes_A;c__Clostridia;o__Oscillospirales;f__Oscillospiraceae;g__CAG-110	91.6	blast;93.90 iPHoP-RF;86.00
RGVC396	32.1	d__Bacteria;p__Firmicutes;c__Bacilli;o__Erysipelotrichales;f__Erysipelotrichaceae;g__Traorella	91.2	blast;93.60
RGVC400	83.79	d__Bacteria;p__Proteobacteria;c__Gammaproteobacteria;o__Enterobacterales;f__Enterobacteriaceae;g__Escherichia	98.8	blast;96.80 iPHoP-RF;90.10 RaFAH;85.30
RGVC401	36.54	d__Bacteria;p__Firmicutes_A;c__Clostridia;o__Lachnospirales;f__Lachnospiraceae;g__CAG-303	90.8	blast;93.20
RGVC402	23	d__Bacteria;p__Firmicutes_A;c__Clostridia_A;o__Christensenellales;f__Borkfalkiaceae;g__UBA1259	92.7	blast;94.80 iPHoP-RF;72.20
RGVC403	16.29	d__Bacteria;p__Firmicutes_A;c__Clostridia;o__Oscillospirales;f__Oscillospiraceae;g__Flavonifractor	95.6	blast;96.90 iPHoP-RF;80.60
RGVC406	7.23	d__Bacteria;p__Firmicutes_A;c__Clostridia_A;o__Christensenellales;f__CAG-314;g__CAG-314	90.8	blast;93.20 iPHoP-RF;64.80
RGVC407	32.19	d__Bacteria;p__Firmicutes_A;c__Clostridia;o__Oscillospirales;f__Oscillospiraceae;g__CAG-110	95.6	blast;96.90 iPHoP-RF;70.20
RGVC409	13.71	d__Bacteria;p__Firmicutes_A;c__Clostridia;o__Oscillospirales;f__Ruminococcaceae;g__D5	98.5	CRISPR;98.90 blast;97.90 iPHoP-RF;76.10
RGVC412	14.7	d__Bacteria;p__Bacteroidota;c__Bacteroidia;o__Bacteroidales;f__Bacteroidaceae;g__Bacteroides	97.2	blast;91.20 RaFAH;88.80 iPHoP-RF;81.40
RGVC414	27.07	d__Bacteria;p__Firmicutes_A;c__Clostridia;o__Oscillospirales;f__Oscillospiraceae;g__CAG-110	95.6	blast;96.90 iPHoP-RF;72.60
RGVC415	29.44	d__Bacteria;p__Bacteroidota;c__Bacteroidia;o__Bacteroidales;f__Bacteroidaceae;g__Prevotella	92.6	CRISPR;94.70 iPHoP-RF;54.40
RGVC417	42.3	d__Bacteria;p__Firmicutes_A;c__Clostridia_A;o__Christensenellales;f__Borkfalkiaceae;g__UBA7597	95.4	blast;96.80 iPHoP-RF;85.10
RGVC418	14.37	d__Bacteria;p__Firmicutes_A;c__Clostridia;o__Oscillospirales;f__Oscillospiraceae;g__CAG-110	91.1	blast;93.50 iPHoP-RF;65.60
RGVC420	18.48	d__Bacteria;p__Firmicutes_A;c__Clostridia_A;o__Christensenellales;f__UBA1242;g__UBA11517	91	blast;93.40
RGVC421	29.93	d__Bacteria;p__Bacteroidota;c__Bacteroidia;o__Bacteroidales;f__Bacteroidaceae;g__Prevotella	95.6	blast;96.90 iPHoP-RF;92.40
RGVC424	13.15	d__Bacteria;p__Firmicutes_A;c__Clostridia;o__Oscillospirales;f__Oscillospiraceae;g__Intestinimonas	90.2	blast;92.70 iPHoP-RF;62.70
RGVC425	13.59	d__Bacteria;p__Firmicutes_A;c__Clostridia;o__Oscillospirales;f__Oscillospiraceae;g__CAG-110	90.7	blast;93.10 iPHoP-RF;74.30
RGVC427	38.42	d__Bacteria;p__Firmicutes_A;c__Clostridia_A;o__Christensenellales;f__CAG-74;g__UBA2862	95.2	blast;96.60 iPHoP-RF;55.20
RGVC429	13.36	d__Bacteria;p__Actinobacteriota;c__Actinomycetia;o__Streptomycetales;f__Streptomycetaceae;g__Streptomyces	95.4	blast;96.80
RGVC429	13.36	d__Bacteria;p__Firmicutes_A;c__Clostridia;o__Oscillospirales;f__Oscillospiraceae;g__Lawsonibacter	90.3	blast;92.80
RGVC433	14.12	d__Bacteria;p__Bacteroidota;c__Bacteroidia;o__Bacteroidales;f__Bacteroidaceae;g__Bacteroides	95.3	iPHoP-RF;89.20 RaFAH;84.50 blast;78.70
RGVC433	14.12	d__Bacteria;p__Bacteroidota;c__Bacteroidia;o__Bacteroidales;f__Bacteroidaceae;g__Phocaeicola	91.6	blast;93.90 iPHoP-RF;80.30
RGVC434	13.77	d__Bacteria;p__Firmicutes_A;c__Clostridia;o__Oscillospirales;f__Ruminococcaceae;g__Ruminiclostridium_E	91.5	blast;93.80 iPHoP-RF;77.10
RGVC435	30.07	d__Bacteria;p__Firmicutes_A;c__Clostridia;o__Lachnospirales;f__Lachnospiraceae;g__UBA3282	94.6	blast;96.20 iPHoP-RF;71.50
RGVC436	19.02	d__Bacteria;p__Firmicutes_A;c__Clostridia_A;o__Christensenellales;f__Borkfalkiaceae;g__QALS01	95.6	blast;96.90 iPHoP-RF;80.30
RGVC438	21.29	d__Bacteria;p__Firmicutes_A;c__Clostridia;o__Oscillospirales;f__Oscillospiraceae;g__UBA1777	91.2	blast;93.60 iPHoP-RF;88.50
RGVC443	18.71	d__Bacteria;p__Bacteroidota;c__Bacteroidia;o__Bacteroidales;f__Bacteroidaceae;g__Bacteroides	98.8	iPHoP-RF;95.70 RaFAH;89.60 blast;89.00
RGVC443	18.71	d__Bacteria;p__Bacteroidota;c__Bacteroidia;o__Bacteroidales;f__Bacteroidaceae;g__Phocaeicola	94.9	iPHoP-RF;96.40 blast;91.90 CRISPR;69.80
RGVC444	10.09	d__Bacteria;p__Firmicutes_A;c__Clostridia;o__Oscillospirales;f__Ruminococcaceae;g__	90.1	blast;92.60 iPHoP-RF;76.10
RGVC447	13.07	d__Bacteria;p__Firmicutes_A;c__Clostridia;o__Oscillospirales;f__Oscillospiraceae;g__CAG-110	91.5	blast;93.80 iPHoP-RF;67.00
RGVC453	34.96	d__Bacteria;p__Firmicutes_A;c__Clostridia;o__Oscillospirales;f__Oscillospiraceae;g__Intestinimonas	90.4	blast;92.90
RGVC454	98.03	d__Bacteria;p__Proteobacteria;c__Gammaproteobacteria;o__Enterobacterales;f__Enterobacteriaceae;g__Escherichia	99.7	iPHoP-RF;97.10 blast;96.90 RaFAH;94.50 CRISPR;74.90
RGVC455	6.42	d__Bacteria;p__Firmicutes_A;c__Clostridia;o__Oscillospirales;f__Oscillospiraceae;g__CAG-110	95.6	blast;96.90 iPHoP-RF;60.90
RGVC457	8.01	d__Bacteria;p__Firmicutes_A;c__Clostridia;o__Oscillospirales;f__Oscillospiraceae;g__Dysosmobacter	91.1	blast;93.50 iPHoP-RF;76.10
RGVC458	44.13	d__Bacteria;p__Firmicutes_A;c__Clostridia_A;o__Christensenellales;f__CAG-74;g__UBA2862	91.6	blast;93.90 iPHoP-RF;78.50
RGVC459	30.93	d__Bacteria;p__Bacteroidota;c__Bacteroidia;o__Bacteroidales;f__Bacteroidaceae;g__Bacteroides	99.1	iPHoP-RF;97.10 RaFAH;87.50
RGVC460	32.2	d__Bacteria;p__Firmicutes_A;c__Clostridia;o__Lachnospirales;f__Lachnospiraceae;g__Enterocloster	91.5	blast;93.80
RGVC467	12.71	d__Bacteria;p__Firmicutes;c__Bacilli;o__RF39;f__UBA660;g__CAG-877	91.6	blast;93.90
RGVC468	15.05	d__Bacteria;p__Firmicutes_A;c__Clostridia_A;o__Christensenellales;f__UBA1242;g__HGM11367	92.5	blast;94.60 iPHoP-RF;67.70
RGVC469	14.95	d__Bacteria;p__Firmicutes_A;c__Clostridia;o__Oscillospirales;f__Oscillospiraceae;g__NSJ-62	91.6	blast;93.90
RGVC470	28.53	d__Bacteria;p__Firmicutes_A;c__Clostridia;o__Oscillospirales;f__Oscillospiraceae;g__CAG-110	95.6	blast;96.90 iPHoP-RF;50.90
RGVC472	13.53	d__Bacteria;p__Firmicutes_A;c__Clostridia_A;o__Christensenellales;f__Borkfalkiaceae;g__UBA1259	90.3	blast;92.80 iPHoP-RF;56.20
RGVC474	10.74	d__Bacteria;p__Firmicutes_A;c__Clostridia;o__Oscillospirales;f__Oscillospiraceae;g__CAG-110	91.5	blast;93.80 iPHoP-RF;64.50
RGVC477	39	d__Bacteria;p__Firmicutes_A;c__Clostridia;o__Oscillospirales;f__Oscillospiraceae;g__CAG-110	95.6	blast;96.90
RGVC478	26.16	d__Bacteria;p__Bacteroidota;c__Bacteroidia;o__Bacteroidales;f__Bacteroidaceae;g__Bacteroides	99.3	iPHoP-RF;95.10 RaFAH;93.80
RGVC479	22.22	d__Bacteria;p__Firmicutes;c__Bacilli;o__RF39;f__UBA660;g__CAG-878	91.6	blast;93.90
RGVC484	33.98	d__Bacteria;p__Firmicutes_A;c__Clostridia_A;o__Christensenellales;f__CAG-74;g__UBA2862	94.5	blast;96.10 iPHoP-RF;57.30
RGVC484	33.98	d__Bacteria;p__Firmicutes_A;c__Clostridia_A;o__Christensenellales;f__CAG-74;g__SFTH01	91.2	blast;93.60
RGVC486	30.34	d__Bacteria;p__Firmicutes_A;c__Clostridia_A;o__Christensenellales;f__CAG-74;g__UBA11524	95.6	blast;96.90 iPHoP-RF;50.40
RGVC487	12.67	d__Bacteria;p__Firmicutes_A;c__Clostridia_A;o__Christensenellales;f__CAG-138;g__SFEL01	95.6	blast;96.90 iPHoP-RF;57.10
RGVC487	12.67	d__Bacteria;p__Firmicutes_A;c__Clostridia_A;o__Christensenellales;f__CAG-74;g__UBA2862	94	blast;95.80
RGVC489	14.67	d__Bacteria;p__Firmicutes;c__Bacilli;o__RF39;f__UBA660;g__CAG-1000	91.6	blast;93.90 iPHoP-RF;74.60
RGVC492	17.44	d__Bacteria;p__Firmicutes_A;c__Clostridia;o__Lachnospirales;f__Lachnospiraceae;g__Acetatifactor	91.6	blast;93.90 iPHoP-RF;89.50
RGVC495	30.29	d__Bacteria;p__Firmicutes;c__Bacilli;o__RF39;f__UBA660;g__UBA3631	90.6	blast;93.00
RGVC499	38.15	d__Bacteria;p__Firmicutes_A;c__Clostridia_A;o__Christensenellales;f__Borkfalkiaceae;g__UMGS1004	92.7	blast;94.80
RGVC500	32.06	d__Bacteria;p__Firmicutes_A;c__Clostridia;o__Oscillospirales;f__Ruminococcaceae;g__Firm-04	92.1	blast;94.30 iPHoP-RF;56.00
[truncated: 12,434 more rows]
