# Supplementary material for: Spatial heterogeneity of viral communities across the gastrointestinal tracts of ruminants
Source: Research Square preprint supplement (doi:10.21203/rs.3.rs-4244627/v1), 2024-04-10
Supplement: Supplementary file 11 [file 83e54487d753e03c932dd6be.xlsx]

## Sheet: Table S6
Table S6. Taxonomically assigned of vOTUs
RGVC	Contig	N_genes_with_taxonomy	Agreement	Taxid	Superkingdom	Realm	Kingdom	Phylum	Class	Order	Family
RGVC1	2022NBT-1	96	0.958	2561	Viruses	Duplodnaviria	Heunggongvirae	Uroviricota	Caudoviricetes
RGVC2	2022NBT-10	129	0.9856	2561	Viruses	Duplodnaviria	Heunggongvirae	Uroviricota	Caudoviricetes
RGVC3	2022NBT-100485	2	1	2561	Viruses	Duplodnaviria	Heunggongvirae	Uroviricota	Caudoviricetes
RGVC4	2022NBT-100608	4	1	2561	Viruses	Duplodnaviria	Heunggongvirae	Uroviricota	Caudoviricetes
RGVC5	2022NBT-10062	19	1	2561	Viruses	Duplodnaviria	Heunggongvirae	Uroviricota	Caudoviricetes
RGVC6	2022NBT-10064	34	0.988	2561	Viruses	Duplodnaviria	Heunggongvirae	Uroviricota	Caudoviricetes
RGVC7	2022NBT-10065	29	0.9428	2561	Viruses	Duplodnaviria	Heunggongvirae	Uroviricota	Caudoviricetes
RGVC8	2022NBT-10069	34	0.9937	2561	Viruses	Duplodnaviria	Heunggongvirae	Uroviricota	Caudoviricetes
RGVC9	2022NBT-10081	11	1	2561	Viruses	Duplodnaviria	Heunggongvirae	Uroviricota	Caudoviricetes
RGVC10	2022NBT-100944	17	1	2561	Viruses	Duplodnaviria	Heunggongvirae	Uroviricota	Caudoviricetes
RGVC11	2022NBT-10096	15	1	2561	Viruses	Duplodnaviria	Heunggongvirae	Uroviricota	Caudoviricetes
RGVC12	2022NBT-10107_1	29	0.9774	2561	Viruses	Duplodnaviria	Heunggongvirae	Uroviricota	Caudoviricetes
RGVC13	2022NBT-1011	95	0.9945	2561	Viruses	Duplodnaviria	Heunggongvirae	Uroviricota	Caudoviricetes
RGVC14	2022NBT-10122	17	1	2561	Viruses	Duplodnaviria	Heunggongvirae	Uroviricota	Caudoviricetes
RGVC15	2022NBT-101271	22	1	2561	Viruses	Duplodnaviria	Heunggongvirae	Uroviricota	Caudoviricetes
RGVC16	2022NBT-1013	54	0.9836	2561	Viruses	Duplodnaviria	Heunggongvirae	Uroviricota	Caudoviricetes
RGVC17	2022NBT-1014_1	20	1	2561	Viruses	Duplodnaviria	Heunggongvirae	Uroviricota	Caudoviricetes
RGVC18	2022NBT-101408	4	1	2561	Viruses	Duplodnaviria	Heunggongvirae	Uroviricota	Caudoviricetes
RGVC19	2022NBT-1015_1	38	1	2561	Viruses	Duplodnaviria	Heunggongvirae	Uroviricota	Caudoviricetes
RGVC21	2022NBT-10157_1	39	1	2561	Viruses	Duplodnaviria	Heunggongvirae	Uroviricota	Caudoviricetes
RGVC22	2022NBT-101582	3	1	2561	Viruses	Duplodnaviria	Heunggongvirae	Uroviricota	Caudoviricetes
RGVC23	2022NBT-101640_1	20	1	2561	Viruses	Duplodnaviria	Heunggongvirae	Uroviricota	Caudoviricetes
RGVC24	2022NBT-101643	22	1	2561	Viruses	Duplodnaviria	Heunggongvirae	Uroviricota	Caudoviricetes
RGVC25	2022NBT-1017_1	41	1	2561	Viruses	Duplodnaviria	Heunggongvirae	Uroviricota	Caudoviricetes
RGVC26	2022NBT-10175	24	1	2561	Viruses	Duplodnaviria	Heunggongvirae	Uroviricota	Caudoviricetes
RGVC27	2022NBT-10182_1	30	1	2561	Viruses	Duplodnaviria	Heunggongvirae	Uroviricota	Caudoviricetes
RGVC28	2022NBT-10182_2	31	1	2561	Viruses	Duplodnaviria	Heunggongvirae	Uroviricota	Caudoviricetes
RGVC29	2022NBT-101864	3	0.6361	2561	Viruses	Duplodnaviria	Heunggongvirae	Uroviricota	Caudoviricetes
RGVC30	2022NBT-10190_1	43	1	2561	Viruses	Duplodnaviria	Heunggongvirae	Uroviricota	Caudoviricetes
RGVC31	2022NBT-10209	34	1	2561	Viruses	Duplodnaviria	Heunggongvirae	Uroviricota	Caudoviricetes
RGVC32	2022NBT-1021	94	0.9908	2561	Viruses	Duplodnaviria	Heunggongvirae	Uroviricota	Caudoviricetes
RGVC33	2022NBT-10218	17	0.9771	2561	Viruses	Duplodnaviria	Heunggongvirae	Uroviricota	Caudoviricetes
RGVC34	2022NBT-10219_1	34	1	2561	Viruses	Duplodnaviria	Heunggongvirae	Uroviricota	Caudoviricetes
RGVC35	2022NBT-102322	18	1	2561	Viruses	Duplodnaviria	Heunggongvirae	Uroviricota	Caudoviricetes
RGVC36	2022NBT-10237_1	14	1	2561	Viruses	Duplodnaviria	Heunggongvirae	Uroviricota	Caudoviricetes
RGVC37	2022NBT-1024	47	0.9671	2561	Viruses	Duplodnaviria	Heunggongvirae	Uroviricota	Caudoviricetes
RGVC38	2022NBT-1025_1	38	1	2561	Viruses	Duplodnaviria	Heunggongvirae	Uroviricota	Caudoviricetes
RGVC39	2022NBT-10253	14	1	2561	Viruses	Duplodnaviria	Heunggongvirae	Uroviricota	Caudoviricetes
RGVC40	2022NBT-10257	17	0.9357	2561	Viruses	Duplodnaviria	Heunggongvirae	Uroviricota	Caudoviricetes
RGVC41	2022NBT-10258_1	39	1	2561	Viruses	Duplodnaviria	Heunggongvirae	Uroviricota	Caudoviricetes
RGVC42	2022NBT-1026	77	0.9667	2561	Viruses	Duplodnaviria	Heunggongvirae	Uroviricota	Caudoviricetes
RGVC43	2022NBT-10261	101	1	2561	Viruses	Duplodnaviria	Heunggongvirae	Uroviricota	Caudoviricetes
RGVC44	2022NBT-102619	15	1	2561	Viruses	Duplodnaviria	Heunggongvirae	Uroviricota	Caudoviricetes
RGVC45	2022NBT-10278	14	0.9039	2561	Viruses	Duplodnaviria	Heunggongvirae	Uroviricota	Caudoviricetes
RGVC46	2022NBT-10281	104	1	2561	Viruses	Duplodnaviria	Heunggongvirae	Uroviricota	Caudoviricetes
RGVC47	2022NBT-102869	20	1	2561	Viruses	Duplodnaviria	Heunggongvirae	Uroviricota	Caudoviricetes
RGVC48	2022NBT-10288	13	1	2561	Viruses	Duplodnaviria	Heunggongvirae	Uroviricota	Caudoviricetes
RGVC49	2022NBT-10295	23	0.9836	2561	Viruses	Duplodnaviria	Heunggongvirae	Uroviricota	Caudoviricetes
RGVC50	2022NBT-103107	17	1	2561	Viruses	Duplodnaviria	Heunggongvirae	Uroviricota	Caudoviricetes
RGVC51	2022NBT-1032	55	0.9624	2561	Viruses	Duplodnaviria	Heunggongvirae	Uroviricota	Caudoviricetes
RGVC52	2022NBT-10321	94	1	2561	Viruses	Duplodnaviria	Heunggongvirae	Uroviricota	Caudoviricetes
RGVC53	2022NBT-10329	38	0.9916	2561	Viruses	Duplodnaviria	Heunggongvirae	Uroviricota	Caudoviricetes
RGVC54	2022NBT-10336	122	1	2561	Viruses	Duplodnaviria	Heunggongvirae	Uroviricota	Caudoviricetes
RGVC55	2022NBT-10345	20	0.9477	2561	Viruses	Duplodnaviria	Heunggongvirae	Uroviricota	Caudoviricetes
RGVC56	2022NBT-1035	72	0.9759	2561	Viruses	Duplodnaviria	Heunggongvirae	Uroviricota	Caudoviricetes
RGVC57	2022NBT-10354_1	26	1	2561	Viruses	Duplodnaviria	Heunggongvirae	Uroviricota	Caudoviricetes
RGVC58	2022NBT-103617	24	1	2561	Viruses	Duplodnaviria	Heunggongvirae	Uroviricota	Caudoviricetes
RGVC59	2022NBT-1037_1	34	1	2561	Viruses	Duplodnaviria	Heunggongvirae	Uroviricota	Caudoviricetes
RGVC60	2022NBT-10374	17	1	2561	Viruses	Duplodnaviria	Heunggongvirae	Uroviricota	Caudoviricetes
RGVC61	2022NBT-10376	18	1	2561	Viruses	Duplodnaviria	Heunggongvirae	Uroviricota	Caudoviricetes
RGVC62	2022NBT-1039	53	0.9743	2561	Viruses	Duplodnaviria	Heunggongvirae	Uroviricota	Caudoviricetes
RGVC63	2022NBT-10395	24	1	2561	Viruses	Duplodnaviria	Heunggongvirae	Uroviricota	Caudoviricetes
RGVC64	2022NBT-104	74	0.9955	2561	Viruses	Duplodnaviria	Heunggongvirae	Uroviricota	Caudoviricetes
RGVC65	2022NBT-1040	80	0.9957	2561	Viruses	Duplodnaviria	Heunggongvirae	Uroviricota	Caudoviricetes
RGVC66	2022NBT-10402	23	0.89	2561	Viruses	Duplodnaviria	Heunggongvirae	Uroviricota	Caudoviricetes
RGVC68	2022NBT-10404_1	29	1	2561	Viruses	Duplodnaviria	Heunggongvirae	Uroviricota	Caudoviricetes
RGVC69	2022NBT-10411	88	1	2561	Viruses	Duplodnaviria	Heunggongvirae	Uroviricota	Caudoviricetes
RGVC70	2022NBT-10415	86	1	2561	Viruses	Duplodnaviria	Heunggongvirae	Uroviricota	Caudoviricetes
RGVC71	2022NBT-104156	3	0.7624	7220	Viruses	Monodnaviria	Shotokuvirae	Cressdnaviricota	Arfiviricetes	Cirlivirales	Circoviridae
RGVC72	2022NBT-104186	3	0.7462	2561	Viruses	Duplodnaviria	Heunggongvirae	Uroviricota	Caudoviricetes
RGVC73	2022NBT-10419_1	5	1	2561	Viruses	Duplodnaviria	Heunggongvirae	Uroviricota	Caudoviricetes
RGVC74	2022NBT-1042	57	0.919	2561	Viruses	Duplodnaviria	Heunggongvirae	Uroviricota	Caudoviricetes
RGVC75	2022NBT-10442	11	1	2561	Viruses	Duplodnaviria	Heunggongvirae	Uroviricota	Caudoviricetes
RGVC76	2022NBT-10445	34	0.9859	2561	Viruses	Duplodnaviria	Heunggongvirae	Uroviricota	Caudoviricetes
RGVC77	2022NBT-10449_1	64	1	2561	Viruses	Duplodnaviria	Heunggongvirae	Uroviricota	Caudoviricetes
RGVC78	2022NBT-10456	120	1	2561	Viruses	Duplodnaviria	Heunggongvirae	Uroviricota	Caudoviricetes
RGVC79	2022NBT-10459	27	1	2561	Viruses	Duplodnaviria	Heunggongvirae	Uroviricota	Caudoviricetes
RGVC80	2022NBT-104610	17	1	2561	Viruses	Duplodnaviria	Heunggongvirae	Uroviricota	Caudoviricetes
RGVC81	2022NBT-10464	13	1	2561	Viruses	Duplodnaviria	Heunggongvirae	Uroviricota	Caudoviricetes
RGVC82	2022NBT-1047	83	0.9583	2561	Viruses	Duplodnaviria	Heunggongvirae	Uroviricota	Caudoviricetes
RGVC83	2022NBT-10476	26	1	2561	Viruses	Duplodnaviria	Heunggongvirae	Uroviricota	Caudoviricetes
RGVC84	2022NBT-1048	66	0.9899	2561	Viruses	Duplodnaviria	Heunggongvirae	Uroviricota	Caudoviricetes
RGVC85	2022NBT-10488	17	1	2561	Viruses	Duplodnaviria	Heunggongvirae	Uroviricota	Caudoviricetes
RGVC86	2022NBT-104890	14	1	2561	Viruses	Duplodnaviria	Heunggongvirae	Uroviricota	Caudoviricetes
RGVC87	2022NBT-10492	29	1	2561	Viruses	Duplodnaviria	Heunggongvirae	Uroviricota	Caudoviricetes
RGVC88	2022NBT-104978	17	1	2561	Viruses	Duplodnaviria	Heunggongvirae	Uroviricota	Caudoviricetes
RGVC89	2022NBT-1050	85	0.9829	2561	Viruses	Duplodnaviria	Heunggongvirae	Uroviricota	Caudoviricetes
RGVC90	2022NBT-10500	21	1	2561	Viruses	Duplodnaviria	Heunggongvirae	Uroviricota	Caudoviricetes
RGVC91	2022NBT-105064	7	1	2561	Viruses	Duplodnaviria	Heunggongvirae	Uroviricota	Caudoviricetes
RGVC92	2022NBT-1053	61	0.981	2561	Viruses	Duplodnaviria	Heunggongvirae	Uroviricota	Caudoviricetes
RGVC93	2022NBT-10535	97	1	2561	Viruses	Duplodnaviria	Heunggongvirae	Uroviricota	Caudoviricetes
RGVC94	2022NBT-10537	12	0.9466	2561	Viruses	Duplodnaviria	Heunggongvirae	Uroviricota	Caudoviricetes
RGVC95	2022NBT-10592_1	28	1	2561	Viruses	Duplodnaviria	Heunggongvirae	Uroviricota	Caudoviricetes
RGVC96	2022NBT-10596	37	1	2561	Viruses	Duplodnaviria	Heunggongvirae	Uroviricota	Caudoviricetes
RGVC97	2022NBT-106	95	0.9689	2561	Viruses	Duplodnaviria	Heunggongvirae	Uroviricota	Caudoviricetes
RGVC98	2022NBT-10600	23	0.9776	2561	Viruses	Duplodnaviria	Heunggongvirae	Uroviricota	Caudoviricetes
RGVC99	2022NBT-106159	7	1	2561	Viruses	Duplodnaviria	Heunggongvirae	Uroviricota	Caudoviricetes
RGVC100	2022NBT-1062	56	1	2561	Viruses	Duplodnaviria	Heunggongvirae	Uroviricota	Caudoviricetes
RGVC101	2022NBT-106276	9	1	2561	Viruses	Duplodnaviria	Heunggongvirae	Uroviricota	Caudoviricetes
RGVC102	2022NBT-10639	19	1	2561	Viruses	Duplodnaviria	Heunggongvirae	Uroviricota	Caudoviricetes
RGVC103	2022NBT-10641	100	1	2561	Viruses	Duplodnaviria	Heunggongvirae	Uroviricota	Caudoviricetes
RGVC104	2022NBT-10648_1	23	1	2561	Viruses	Duplodnaviria	Heunggongvirae	Uroviricota	Caudoviricetes
RGVC105	2022NBT-1065	18	0.9556	2561	Viruses	Duplodnaviria	Heunggongvirae	Uroviricota	Caudoviricetes
RGVC106	2022NBT-10655_1	31	1	2561	Viruses	Duplodnaviria	Heunggongvirae	Uroviricota	Caudoviricetes
RGVC107	2022NBT-1066	58	0.9804	2561	Viruses	Duplodnaviria	Heunggongvirae	Uroviricota	Caudoviricetes
RGVC108	2022NBT-106640	8	1	2561	Viruses	Duplodnaviria	Heunggongvirae	Uroviricota	Caudoviricetes
RGVC109	2022NBT-106648	16	1	2561	Viruses	Duplodnaviria	Heunggongvirae	Uroviricota	Caudoviricetes
RGVC110	2022NBT-10666_1	27	1	2561	Viruses	Duplodnaviria	Heunggongvirae	Uroviricota	Caudoviricetes
RGVC111	2022NBT-106663	5	1	2561	Viruses	Duplodnaviria	Heunggongvirae	Uroviricota	Caudoviricetes
RGVC112	2022NBT-1067	82	0.9836	2561	Viruses	Duplodnaviria	Heunggongvirae	Uroviricota	Caudoviricetes
RGVC113	2022NBT-10676	23	0.9288	2561	Viruses	Duplodnaviria	Heunggongvirae	Uroviricota	Caudoviricetes
RGVC114	2022NBT-10680	36	1	2561	Viruses	Duplodnaviria	Heunggongvirae	Uroviricota	Caudoviricetes
RGVC115	2022NBT-10695	18	1	2561	Viruses	Duplodnaviria	Heunggongvirae	Uroviricota	Caudoviricetes
RGVC116	2022NBT-1070	67	0.989	2561	Viruses	Duplodnaviria	Heunggongvirae	Uroviricota	Caudoviricetes
RGVC117	2022NBT-10710_1	53	1	2561	Viruses	Duplodnaviria	Heunggongvirae	Uroviricota	Caudoviricetes
RGVC118	2022NBT-10714	26	1	2561	Viruses	Duplodnaviria	Heunggongvirae	Uroviricota	Caudoviricetes
RGVC119	2022NBT-1072	86	0.9726	2561	Viruses	Duplodnaviria	Heunggongvirae	Uroviricota	Caudoviricetes
RGVC120	2022NBT-107229	9	1	2561	Viruses	Duplodnaviria	Heunggongvirae	Uroviricota	Caudoviricetes
RGVC121	2022NBT-107253	12	1	2561	Viruses	Duplodnaviria	Heunggongvirae	Uroviricota	Caudoviricetes
RGVC122	2022NBT-10734	17	1	2561	Viruses	Duplodnaviria	Heunggongvirae	Uroviricota	Caudoviricetes
RGVC123	2022NBT-107346	11	1	2561	Viruses	Duplodnaviria	Heunggongvirae	Uroviricota	Caudoviricetes
RGVC124	2022NBT-10736	31	1	2561	Viruses	Duplodnaviria	Heunggongvirae	Uroviricota	Caudoviricetes
RGVC125	2022NBT-1074	91	0.9833	2561	Viruses	Duplodnaviria	Heunggongvirae	Uroviricota	Caudoviricetes
RGVC126	2022NBT-107528	3	1	2561	Viruses	Duplodnaviria	Heunggongvirae	Uroviricota	Caudoviricetes
RGVC127	2022NBT-10759	17	1	2561	Viruses	Duplodnaviria	Heunggongvirae	Uroviricota	Caudoviricetes
RGVC128	2022NBT-1076	104	0.9706	2561	Viruses	Duplodnaviria	Heunggongvirae	Uroviricota	Caudoviricetes
RGVC129	2022NBT-10764_1	46	1	2561	Viruses	Duplodnaviria	Heunggongvirae	Uroviricota	Caudoviricetes
RGVC130	2022NBT-10779	25	0.9447	2561	Viruses	Duplodnaviria	Heunggongvirae	Uroviricota	Caudoviricetes
RGVC131	2022NBT-107805	10	1	2561	Viruses	Duplodnaviria	Heunggongvirae	Uroviricota	Caudoviricetes
RGVC132	2022NBT-10783	24	0.9683	2561	Viruses	Duplodnaviria	Heunggongvirae	Uroviricota	Caudoviricetes
RGVC133	2022NBT-1079	74	0.9877	2561	Viruses	Duplodnaviria	Heunggongvirae	Uroviricota	Caudoviricetes
RGVC134	2022NBT-10790	11	1	2561	Viruses	Duplodnaviria	Heunggongvirae	Uroviricota	Caudoviricetes
RGVC135	2022NBT-10791	18	1	2561	Viruses	Duplodnaviria	Heunggongvirae	Uroviricota	Caudoviricetes
RGVC136	2022NBT-10793	54	1	2561	Viruses	Duplodnaviria	Heunggongvirae	Uroviricota	Caudoviricetes
RGVC137	2022NBT-107951	9	1	2561	Viruses	Duplodnaviria	Heunggongvirae	Uroviricota	Caudoviricetes
RGVC138	2022NBT-10799	22	1	2561	Viruses	Duplodnaviria	Heunggongvirae	Uroviricota	Caudoviricetes
RGVC139	2022NBT-1080_1	24	1	2561	Viruses	Duplodnaviria	Heunggongvirae	Uroviricota	Caudoviricetes
RGVC140	2022NBT-10800_1	46	1	2561	Viruses	Duplodnaviria	Heunggongvirae	Uroviricota	Caudoviricetes
RGVC141	2022NBT-108006	1	1	2561	Viruses	Duplodnaviria	Heunggongvirae	Uroviricota	Caudoviricetes
RGVC142	2022NBT-108135	2	1	1	Viruses
RGVC143	2022NBT-10853	33	1	2561	Viruses	Duplodnaviria	Heunggongvirae	Uroviricota	Caudoviricetes
RGVC144	2022NBT-108591	14	1	2561	Viruses	Duplodnaviria	Heunggongvirae	Uroviricota	Caudoviricetes
RGVC145	2022NBT-10861	14	1	2561	Viruses	Duplodnaviria	Heunggongvirae	Uroviricota	Caudoviricetes
RGVC146	2022NBT-108708	8	1	2561	Viruses	Duplodnaviria	Heunggongvirae	Uroviricota	Caudoviricetes
RGVC147	2022NBT-108818	4	1	1	Viruses
RGVC148	2022NBT-10885	27	1	2561	Viruses	Duplodnaviria	Heunggongvirae	Uroviricota	Caudoviricetes
RGVC150	2022NBT-10921_1	13	1	2561	Viruses	Duplodnaviria	Heunggongvirae	Uroviricota	Caudoviricetes
RGVC151	2022NBT-1093_1	69	1	2561	Viruses	Duplodnaviria	Heunggongvirae	Uroviricota	Caudoviricetes
RGVC152	2022NBT-1094	78	0.9712	2561	Viruses	Duplodnaviria	Heunggongvirae	Uroviricota	Caudoviricetes
RGVC153	2022NBT-109537	1	1	4934	Viruses	Monodnaviria	Shotokuvirae	Cressdnaviricota	Arfiviricetes	Cirlivirales
RGVC154	2022NBT-109576	10	1	2561	Viruses	Duplodnaviria	Heunggongvirae	Uroviricota	Caudoviricetes
RGVC155	2022NBT-1096	51	0.9524	2561	Viruses	Duplodnaviria	Heunggongvirae	Uroviricota	Caudoviricetes
RGVC156	2022NBT-109608	21	1	2561	Viruses	Duplodnaviria	Heunggongvirae	Uroviricota	Caudoviricetes
RGVC157	2022NBT-1099	57	0.9892	2561	Viruses	Duplodnaviria	Heunggongvirae	Uroviricota	Caudoviricetes
RGVC158	2022NBT-109932	7	1	2561	Viruses	Duplodnaviria	Heunggongvirae	Uroviricota	Caudoviricetes
RGVC159	2022NBT-110_1	26	1	2561	Viruses	Duplodnaviria	Heunggongvirae	Uroviricota	Caudoviricetes
RGVC160	2022NBT-11003	14	1	2561	Viruses	Duplodnaviria	Heunggongvirae	Uroviricota	Caudoviricetes
RGVC161	2022NBT-11004_1	26	1	2561	Viruses	Duplodnaviria	Heunggongvirae	Uroviricota	Caudoviricetes
RGVC162	2022NBT-11012	30	1	2561	Viruses	Duplodnaviria	Heunggongvirae	Uroviricota	Caudoviricetes
RGVC163	2022NBT-110186	1	1	2561	Viruses	Duplodnaviria	Heunggongvirae	Uroviricota	Caudoviricetes
RGVC164	2022NBT-11035	26	1	2561	Viruses	Duplodnaviria	Heunggongvirae	Uroviricota	Caudoviricetes
RGVC165	2022NBT-1104	59	0.9851	2561	Viruses	Duplodnaviria	Heunggongvirae	Uroviricota	Caudoviricetes
RGVC166	2022NBT-11040	22	1	2561	Viruses	Duplodnaviria	Heunggongvirae	Uroviricota	Caudoviricetes
RGVC167	2022NBT-110460	9	1	2561	Viruses	Duplodnaviria	Heunggongvirae	Uroviricota	Caudoviricetes
RGVC168	2022NBT-11047_1	7	1	2561	Viruses	Duplodnaviria	Heunggongvirae	Uroviricota	Caudoviricetes
RGVC169	2022NBT-11053	11	1	2561	Viruses	Duplodnaviria	Heunggongvirae	Uroviricota	Caudoviricetes
RGVC170	2022NBT-110639	2	1	2561	Viruses	Duplodnaviria	Heunggongvirae	Uroviricota	Caudoviricetes
RGVC171	2022NBT-11077	108	1	2561	Viruses	Duplodnaviria	Heunggongvirae	Uroviricota	Caudoviricetes
RGVC172	2022NBT-110861	14	1	2561	Viruses	Duplodnaviria	Heunggongvirae	Uroviricota	Caudoviricetes
RGVC173	2022NBT-11106_1	34	1	2561	Viruses	Duplodnaviria	Heunggongvirae	Uroviricota	Caudoviricetes
RGVC174	2022NBT-11110	22	1	2561	Viruses	Duplodnaviria	Heunggongvirae	Uroviricota	Caudoviricetes
RGVC175	2022NBT-11116	30	0.9674	2561	Viruses	Duplodnaviria	Heunggongvirae	Uroviricota	Caudoviricetes
RGVC176	2022NBT-111227	1	1	2561	Viruses	Duplodnaviria	Heunggongvirae	Uroviricota	Caudoviricetes
RGVC177	2022NBT-11126_1	21	1	2561	Viruses	Duplodnaviria	Heunggongvirae	Uroviricota	Caudoviricetes
RGVC178	2022NBT-11127	13	1	2561	Viruses	Duplodnaviria	Heunggongvirae	Uroviricota	Caudoviricetes
RGVC179	2022NBT-11144	18	0.9396	2561	Viruses	Duplodnaviria	Heunggongvirae	Uroviricota	Caudoviricetes
RGVC180	2022NBT-11157	28	0.9894	2561	Viruses	Duplodnaviria	Heunggongvirae	Uroviricota	Caudoviricetes
RGVC181	2022NBT-11158_1	15	1	2561	Viruses	Duplodnaviria	Heunggongvirae	Uroviricota	Caudoviricetes
RGVC182	2022NBT-11160	12	1	2561	Viruses	Duplodnaviria	Heunggongvirae	Uroviricota	Caudoviricetes
RGVC183	2022NBT-11165	18	1	2561	Viruses	Duplodnaviria	Heunggongvirae	Uroviricota	Caudoviricetes
RGVC184	2022NBT-11167	30	0.8754	2561	Viruses	Duplodnaviria	Heunggongvirae	Uroviricota	Caudoviricetes
RGVC185	2022NBT-11169	17	0.9561	2561	Viruses	Duplodnaviria	Heunggongvirae	Uroviricota	Caudoviricetes
RGVC186	2022NBT-1117	62	0.982	2561	Viruses	Duplodnaviria	Heunggongvirae	Uroviricota	Caudoviricetes
RGVC187	2022NBT-111741	9	1	2561	Viruses	Duplodnaviria	Heunggongvirae	Uroviricota	Caudoviricetes
RGVC188	2022NBT-11175_1	31	1	2561	Viruses	Duplodnaviria	Heunggongvirae	Uroviricota	Caudoviricetes
RGVC189	2022NBT-1118	89	0.9679	2561	Viruses	Duplodnaviria	Heunggongvirae	Uroviricota	Caudoviricetes
RGVC190	2022NBT-111830	1	1	2561	Viruses	Duplodnaviria	Heunggongvirae	Uroviricota	Caudoviricetes
RGVC191	2022NBT-1119	56	0.9674	2561	Viruses	Duplodnaviria	Heunggongvirae	Uroviricota	Caudoviricetes
RGVC192	2022NBT-111949	9	1	2561	Viruses	Duplodnaviria	Heunggongvirae	Uroviricota	Caudoviricetes
RGVC193	2022NBT-11195	26	0.9472	2561	Viruses	Duplodnaviria	Heunggongvirae	Uroviricota	Caudoviricetes
RGVC194	2022NBT-112	98	0.9828	2561	Viruses	Duplodnaviria	Heunggongvirae	Uroviricota	Caudoviricetes
RGVC195	2022NBT-1120_1	29	0.9865	2561	Viruses	Duplodnaviria	Heunggongvirae	Uroviricota	Caudoviricetes
RGVC196	2022NBT-11201	23	1	2561	Viruses	Duplodnaviria	Heunggongvirae	Uroviricota	Caudoviricetes
RGVC197	2022NBT-1121	68	0.9716	2561	Viruses	Duplodnaviria	Heunggongvirae	Uroviricota	Caudoviricetes
RGVC198	2022NBT-11223	9	1	2561	Viruses	Duplodnaviria	Heunggongvirae	Uroviricota	Caudoviricetes
RGVC199	2022NBT-11225	17	1	2561	Viruses	Duplodnaviria	Heunggongvirae	Uroviricota	Caudoviricetes
RGVC200	2022NBT-112465	1	1	4934	Viruses	Monodnaviria	Shotokuvirae	Cressdnaviricota	Arfiviricetes	Cirlivirales
RGVC201	2022NBT-11249	27	0.9739	2561	Viruses	Duplodnaviria	Heunggongvirae	Uroviricota	Caudoviricetes
RGVC202	2022NBT-11259_1	26	1	2561	Viruses	Duplodnaviria	Heunggongvirae	Uroviricota	Caudoviricetes
RGVC203	2022NBT-11263	14	1	2561	Viruses	Duplodnaviria	Heunggongvirae	Uroviricota	Caudoviricetes
RGVC204	2022NBT-11287	22	0.9862	2561	Viruses	Duplodnaviria	Heunggongvirae	Uroviricota	Caudoviricetes
RGVC205	2022NBT-1129	71	0.9875	2561	Viruses	Duplodnaviria	Heunggongvirae	Uroviricota	Caudoviricetes
RGVC206	2022NBT-11294	33	0.9762	2561	Viruses	Duplodnaviria	Heunggongvirae	Uroviricota	Caudoviricetes
RGVC207	2022NBT-11296_1	33	1	2561	Viruses	Duplodnaviria	Heunggongvirae	Uroviricota	Caudoviricetes
RGVC208	2022NBT-11310	18	1	2561	Viruses	Duplodnaviria	Heunggongvirae	Uroviricota	Caudoviricetes
RGVC209	2022NBT-1132	52	1	2561	Viruses	Duplodnaviria	Heunggongvirae	Uroviricota	Caudoviricetes
RGVC210	2022NBT-11327_1	20	1	2561	Viruses	Duplodnaviria	Heunggongvirae	Uroviricota	Caudoviricetes
RGVC211	2022NBT-11332	11	1	2561	Viruses	Duplodnaviria	Heunggongvirae	Uroviricota	Caudoviricetes
RGVC212	2022NBT-11334	27	1	2561	Viruses	Duplodnaviria	Heunggongvirae	Uroviricota	Caudoviricetes
RGVC213	2022NBT-11339	27	0.9893	2561	Viruses	Duplodnaviria	Heunggongvirae	Uroviricota	Caudoviricetes
RGVC214	2022NBT-11348	20	1	2561	Viruses	Duplodnaviria	Heunggongvirae	Uroviricota	Caudoviricetes
RGVC215	2022NBT-1136_1	27	1	2561	Viruses	Duplodnaviria	Heunggongvirae	Uroviricota	Caudoviricetes
RGVC216	2022NBT-11391	21	1	2561	Viruses	Duplodnaviria	Heunggongvirae	Uroviricota	Caudoviricetes
RGVC217	2022NBT-11406	13	0.9604	2561	Viruses	Duplodnaviria	Heunggongvirae	Uroviricota	Caudoviricetes
RGVC218	2022NBT-1141_1	40	1	2561	Viruses	Duplodnaviria	Heunggongvirae	Uroviricota	Caudoviricetes
RGVC219	2022NBT-114144	11	1	2561	Viruses	Duplodnaviria	Heunggongvirae	Uroviricota	Caudoviricetes
RGVC220	2022NBT-11426	19	1	2561	Viruses	Duplodnaviria	Heunggongvirae	Uroviricota	Caudoviricetes
RGVC221	2022NBT-11437	25	1	2561	Viruses	Duplodnaviria	Heunggongvirae	Uroviricota	Caudoviricetes
RGVC222	2022NBT-114386	2	1	1	Viruses
RGVC223	2022NBT-1144	53	0.9708	2561	Viruses	Duplodnaviria	Heunggongvirae	Uroviricota	Caudoviricetes
RGVC224	2022NBT-114425	4	0.537	1365	Viruses	Monodnaviria	Shotokuvirae	Cressdnaviricota
RGVC226	2022NBT-11459	17	1	2561	Viruses	Duplodnaviria	Heunggongvirae	Uroviricota	Caudoviricetes
RGVC227	2022NBT-11465_1	25	1	2561	Viruses	Duplodnaviria	Heunggongvirae	Uroviricota	Caudoviricetes
RGVC228	2022NBT-11479	21	0.9831	2561	Viruses	Duplodnaviria	Heunggongvirae	Uroviricota	Caudoviricetes
RGVC229	2022NBT-11485	15	0.9698	2561	Viruses	Duplodnaviria	Heunggongvirae	Uroviricota	Caudoviricetes
RGVC230	2022NBT-1149	77	1	2561	Viruses	Duplodnaviria	Heunggongvirae	Uroviricota	Caudoviricetes
RGVC231	2022NBT-11498_1	28	1	2561	Viruses	Duplodnaviria	Heunggongvirae	Uroviricota	Caudoviricetes
RGVC232	2022NBT-1150_1	31	1	2561	Viruses	Duplodnaviria	Heunggongvirae	Uroviricota	Caudoviricetes
RGVC233	2022NBT-11506	16	1	2561	Viruses	Duplodnaviria	Heunggongvirae	Uroviricota	Caudoviricetes
RGVC234	2022NBT-1151	84	0.9692	2561	Viruses	Duplodnaviria	Heunggongvirae	Uroviricota	Caudoviricetes
RGVC235	2022NBT-1152	92	0.9741	2561	Viruses	Duplodnaviria	Heunggongvirae	Uroviricota	Caudoviricetes
RGVC236	2022NBT-11525	32	1	2561	Viruses	Duplodnaviria	Heunggongvirae	Uroviricota	Caudoviricetes
RGVC237	2022NBT-115430	8	1	2561	Viruses	Duplodnaviria	Heunggongvirae	Uroviricota	Caudoviricetes
RGVC238	2022NBT-11548	17	0.9756	2561	Viruses	Duplodnaviria	Heunggongvirae	Uroviricota	Caudoviricetes
RGVC239	2022NBT-11553_1	31	1	2561	Viruses	Duplodnaviria	Heunggongvirae	Uroviricota	Caudoviricetes
RGVC240	2022NBT-1157	52	0.9796	2561	Viruses	Duplodnaviria	Heunggongvirae	Uroviricota	Caudoviricetes
RGVC241	2022NBT-11574_1	20	1	2561	Viruses	Duplodnaviria	Heunggongvirae	Uroviricota	Caudoviricetes
RGVC242	2022NBT-11585	26	1	2561	Viruses	Duplodnaviria	Heunggongvirae	Uroviricota	Caudoviricetes
RGVC243	2022NBT-11591_1	15	1	2561	Viruses	Duplodnaviria	Heunggongvirae	Uroviricota	Caudoviricetes
RGVC244	2022NBT-115912	5	1	2561	Viruses	Duplodnaviria	Heunggongvirae	Uroviricota	Caudoviricetes
RGVC245	2022NBT-11592_1	16	1	2561	Viruses	Duplodnaviria	Heunggongvirae	Uroviricota	Caudoviricetes
RGVC246	2022NBT-116019	3	1	2561	Viruses	Duplodnaviria	Heunggongvirae	Uroviricota	Caudoviricetes
RGVC247	2022NBT-11606	94	1	2561	Viruses	Duplodnaviria	Heunggongvirae	Uroviricota	Caudoviricetes
RGVC248	2022NBT-11609	12	1	2561	Viruses	Duplodnaviria	Heunggongvirae	Uroviricota	Caudoviricetes
RGVC249	2022NBT-1162	82	0.9947	2561	Viruses	Duplodnaviria	Heunggongvirae	Uroviricota	Caudoviricetes
RGVC250	2022NBT-11621	22	1	2561	Viruses	Duplodnaviria	Heunggongvirae	Uroviricota	Caudoviricetes
RGVC251	2022NBT-116234	2	1	2561	Viruses	Duplodnaviria	Heunggongvirae	Uroviricota	Caudoviricetes
RGVC252	2022NBT-11624	15	0.863	2561	Viruses	Duplodnaviria	Heunggongvirae	Uroviricota	Caudoviricetes
RGVC253	2022NBT-11625_1	33	1	2561	Viruses	Duplodnaviria	Heunggongvirae	Uroviricota	Caudoviricetes
RGVC254	2022NBT-11627	19	0.839	2561	Viruses	Duplodnaviria	Heunggongvirae	Uroviricota	Caudoviricetes
RGVC255	2022NBT-1163_1	10	1	2561	Viruses	Duplodnaviria	Heunggongvirae	Uroviricota	Caudoviricetes
RGVC256	2022NBT-11637	8	1	2561	Viruses	Duplodnaviria	Heunggongvirae	Uroviricota	Caudoviricetes
RGVC257	2022NBT-1165	69	0.996	2561	Viruses	Duplodnaviria	Heunggongvirae	Uroviricota	Caudoviricetes
RGVC258	2022NBT-116770	5	1	2561	Viruses	Duplodnaviria	Heunggongvirae	Uroviricota	Caudoviricetes
RGVC260	2022NBT-1169	85	0.9712	2561	Viruses	Duplodnaviria	Heunggongvirae	Uroviricota	Caudoviricetes
RGVC261	2022NBT-11699	92	1	2561	Viruses	Duplodnaviria	Heunggongvirae	Uroviricota	Caudoviricetes
RGVC262	2022NBT-117	92	0.9703	2561	Viruses	Duplodnaviria	Heunggongvirae	Uroviricota	Caudoviricetes
RGVC263	2022NBT-1171	73	0.9548	2561	Viruses	Duplodnaviria	Heunggongvirae	Uroviricota	Caudoviricetes
RGVC264	2022NBT-11721	18	1	2561	Viruses	Duplodnaviria	Heunggongvirae	Uroviricota	Caudoviricetes
RGVC265	2022NBT-117247	10	1	2561	Viruses	Duplodnaviria	Heunggongvirae	Uroviricota	Caudoviricetes
RGVC266	2022NBT-117428	1	1	2561	Viruses	Duplodnaviria	Heunggongvirae	Uroviricota	Caudoviricetes
RGVC267	2022NBT-11744	24	0.9672	2561	Viruses	Duplodnaviria	Heunggongvirae	Uroviricota	Caudoviricetes
RGVC268	2022NBT-11746_1	42	1	2561	Viruses	Duplodnaviria	Heunggongvirae	Uroviricota	Caudoviricetes
RGVC269	2022NBT-11747	20	1	2561	Viruses	Duplodnaviria	Heunggongvirae	Uroviricota	Caudoviricetes
RGVC270	2022NBT-11749	31	1	2561	Viruses	Duplodnaviria	Heunggongvirae	Uroviricota	Caudoviricetes
RGVC271	2022NBT-1175	46	1	2561	Viruses	Duplodnaviria	Heunggongvirae	Uroviricota	Caudoviricetes
RGVC272	2022NBT-11750	13	0.8365	2561	Viruses	Duplodnaviria	Heunggongvirae	Uroviricota	Caudoviricetes
RGVC273	2022NBT-1176	42	0.9551	2561	Viruses	Duplodnaviria	Heunggongvirae	Uroviricota	Caudoviricetes
RGVC274	2022NBT-11774	22	1	2561	Viruses	Duplodnaviria	Heunggongvirae	Uroviricota	Caudoviricetes
RGVC275	2022NBT-117764	9	1	2561	Viruses	Duplodnaviria	Heunggongvirae	Uroviricota	Caudoviricetes
RGVC276	2022NBT-1178	59	0.9629	2561	Viruses	Duplodnaviria	Heunggongvirae	Uroviricota	Caudoviricetes
RGVC277	2022NBT-11823	20	1	2561	Viruses	Duplodnaviria	Heunggongvirae	Uroviricota	Caudoviricetes
RGVC278	2022NBT-11825_1	22	1	2561	Viruses	Duplodnaviria	Heunggongvirae	Uroviricota	Caudoviricetes
RGVC279	2022NBT-118291	2	0.7205	7220	Viruses	Monodnaviria	Shotokuvirae	Cressdnaviricota	Arfiviricetes	Cirlivirales	Circoviridae
RGVC280	2022NBT-1183	47	0.9727	2561	Viruses	Duplodnaviria	Heunggongvirae	Uroviricota	Caudoviricetes
RGVC281	2022NBT-1185	78	0.9872	2561	Viruses	Duplodnaviria	Heunggongvirae	Uroviricota	Caudoviricetes
RGVC282	2022NBT-1187	48	0.9893	2561	Viruses	Duplodnaviria	Heunggongvirae	Uroviricota	Caudoviricetes
RGVC283	2022NBT-118829	9	1	2561	Viruses	Duplodnaviria	Heunggongvirae	Uroviricota	Caudoviricetes
RGVC284	2022NBT-11885	12	1	2561	Viruses	Duplodnaviria	Heunggongvirae	Uroviricota	Caudoviricetes
RGVC285	2022NBT-1189	49	0.9845	2561	Viruses	Duplodnaviria	Heunggongvirae	Uroviricota	Caudoviricetes
RGVC286	2022NBT-118909	1	1	4934	Viruses	Monodnaviria	Shotokuvirae	Cressdnaviricota	Arfiviricetes	Cirlivirales
RGVC287	2022NBT-119_1	34	1	2561	Viruses	Duplodnaviria	Heunggongvirae	Uroviricota	Caudoviricetes
RGVC288	2022NBT-1191	83	0.9842	2561	Viruses	Duplodnaviria	Heunggongvirae	Uroviricota	Caudoviricetes
RGVC289	2022NBT-11911	46	0.9668	2561	Viruses	Duplodnaviria	Heunggongvirae	Uroviricota	Caudoviricetes
RGVC290	2022NBT-1192	77	0.9797	2561	Viruses	Duplodnaviria	Heunggongvirae	Uroviricota	Caudoviricetes
RGVC291	2022NBT-11929	18	0.9512	2561	Viruses	Duplodnaviria	Heunggongvirae	Uroviricota	Caudoviricetes
RGVC292	2022NBT-11933_1	29	1	2561	Viruses	Duplodnaviria	Heunggongvirae	Uroviricota	Caudoviricetes
RGVC293	2022NBT-119334	12	1	2561	Viruses	Duplodnaviria	Heunggongvirae	Uroviricota	Caudoviricetes
RGVC294	2022NBT-1195	76	0.9812	2561	Viruses	Duplodnaviria	Heunggongvirae	Uroviricota	Caudoviricetes
RGVC295	2022NBT-1196_1	21	1	2561	Viruses	Duplodnaviria	Heunggongvirae	Uroviricota	Caudoviricetes
RGVC296	2022NBT-119606	2	0.6497	2561	Viruses	Duplodnaviria	Heunggongvirae	Uroviricota	Caudoviricetes
RGVC297	2022NBT-11966	41	1	2561	Viruses	Duplodnaviria	Heunggongvirae	Uroviricota	Caudoviricetes
RGVC298	2022NBT-1197	87	0.9802	2561	Viruses	Duplodnaviria	Heunggongvirae	Uroviricota	Caudoviricetes
RGVC299	2022NBT-119795	2	1	2561	Viruses	Duplodnaviria	Heunggongvirae	Uroviricota	Caudoviricetes
RGVC300	2022NBT-1199	96	0.9906	2561	Viruses	Duplodnaviria	Heunggongvirae	Uroviricota	Caudoviricetes
RGVC301	2022NBT-119922	8	1	2561	Viruses	Duplodnaviria	Heunggongvirae	Uroviricota	Caudoviricetes
RGVC302	2022NBT-11996	18	1	2561	Viruses	Duplodnaviria	Heunggongvirae	Uroviricota	Caudoviricetes
RGVC303	2022NBT-12	104	0.9544	2561	Viruses	Duplodnaviria	Heunggongvirae	Uroviricota	Caudoviricetes
RGVC304	2022NBT-1200	69	0.9839	2561	Viruses	Duplodnaviria	Heunggongvirae	Uroviricota	Caudoviricetes
RGVC305	2022NBT-1201_1	33	1	2561	Viruses	Duplodnaviria	Heunggongvirae	Uroviricota	Caudoviricetes
RGVC306	2022NBT-1202	71	0.9753	2561	Viruses	Duplodnaviria	Heunggongvirae	Uroviricota	Caudoviricetes
RGVC307	2022NBT-1203	72	0.9934	2561	Viruses	Duplodnaviria	Heunggongvirae	Uroviricota	Caudoviricetes
RGVC308	2022NBT-120311	2	0.7326	2561	Viruses	Duplodnaviria	Heunggongvirae	Uroviricota	Caudoviricetes
RGVC309	2022NBT-12040	20	1	2561	Viruses	Duplodnaviria	Heunggongvirae	Uroviricota	Caudoviricetes
RGVC311	2022NBT-1205	65	0.9955	2561	Viruses	Duplodnaviria	Heunggongvirae	Uroviricota	Caudoviricetes
RGVC312	2022NBT-12050	19	1	2561	Viruses	Duplodnaviria	Heunggongvirae	Uroviricota	Caudoviricetes
RGVC313	2022NBT-12054	14	1	2561	Viruses	Duplodnaviria	Heunggongvirae	Uroviricota	Caudoviricetes
RGVC315	2022NBT-120799	9	1	2561	Viruses	Duplodnaviria	Heunggongvirae	Uroviricota	Caudoviricetes
RGVC316	2022NBT-120838	2	1	2561	Viruses	Duplodnaviria	Heunggongvirae	Uroviricota	Caudoviricetes
RGVC317	2022NBT-1209	86	0.9908	2561	Viruses	Duplodnaviria	Heunggongvirae	Uroviricota	Caudoviricetes
RGVC318	2022NBT-12115_1	25	1	2561	Viruses	Duplodnaviria	Heunggongvirae	Uroviricota	Caudoviricetes
RGVC319	2022NBT-12126_1	64	1	2561	Viruses	Duplodnaviria	Heunggongvirae	Uroviricota	Caudoviricetes
RGVC320	2022NBT-121262	5	1	2561	Viruses	Duplodnaviria	Heunggongvirae	Uroviricota	Caudoviricetes
RGVC321	2022NBT-12130	15	0.8968	2561	Viruses	Duplodnaviria	Heunggongvirae	Uroviricota	Caudoviricetes
RGVC322	2022NBT-12133	18	0.9597	2561	Viruses	Duplodnaviria	Heunggongvirae	Uroviricota	Caudoviricetes
RGVC323	2022NBT-121624_1	5	0.8603	2790	Viruses	Monodnaviria	Sangervirae	Phixviricota	Malgrandaviricetes	Petitvirales	Microviridae
RGVC324	2022NBT-1217	43	0.9882	2561	Viruses	Duplodnaviria	Heunggongvirae	Uroviricota	Caudoviricetes
RGVC325	2022NBT-122	88	0.9753	2561	Viruses	Duplodnaviria	Heunggongvirae	Uroviricota	Caudoviricetes
RGVC326	2022NBT-1220	62	0.9874	2561	Viruses	Duplodnaviria	Heunggongvirae	Uroviricota	Caudoviricetes
RGVC327	2022NBT-12206	12	1	2561	Viruses	Duplodnaviria	Heunggongvirae	Uroviricota	Caudoviricetes
RGVC328	2022NBT-12207	38	1	2561	Viruses	Duplodnaviria	Heunggongvirae	Uroviricota	Caudoviricetes
RGVC329	2022NBT-12228	23	0.8122	2561	Viruses	Duplodnaviria	Heunggongvirae	Uroviricota	Caudoviricetes
RGVC330	2022NBT-1224	27	1	2561	Viruses	Duplodnaviria	Heunggongvirae	Uroviricota	Caudoviricetes
RGVC331	2022NBT-122577	4	1	2561	Viruses	Duplodnaviria	Heunggongvirae	Uroviricota	Caudoviricetes
RGVC332	2022NBT-12259	30	1	2561	Viruses	Duplodnaviria	Heunggongvirae	Uroviricota	Caudoviricetes
RGVC333	2022NBT-1226_1	23	1	2561	Viruses	Duplodnaviria	Heunggongvirae	Uroviricota	Caudoviricetes
RGVC334	2022NBT-122969	8	1	2561	Viruses	Duplodnaviria	Heunggongvirae	Uroviricota	Caudoviricetes
RGVC335	2022NBT-1231	60	0.9941	2561	Viruses	Duplodnaviria	Heunggongvirae	Uroviricota	Caudoviricetes
RGVC336	2022NBT-12330_1	7	1	2561	Viruses	Duplodnaviria	Heunggongvirae	Uroviricota	Caudoviricetes
RGVC337	2022NBT-12352_1	19	1	2561	Viruses	Duplodnaviria	Heunggongvirae	Uroviricota	Caudoviricetes
RGVC338	2022NBT-12369	21	1	2561	Viruses	Duplodnaviria	Heunggongvirae	Uroviricota	Caudoviricetes
RGVC339	2022NBT-1237_1	35	1	2561	Viruses	Duplodnaviria	Heunggongvirae	Uroviricota	Caudoviricetes
RGVC340	2022NBT-123730	4	1	2561	Viruses	Duplodnaviria	Heunggongvirae	Uroviricota	Caudoviricetes
RGVC341	2022NBT-12387	15	0.9599	2561	Viruses	Duplodnaviria	Heunggongvirae	Uroviricota	Caudoviricetes
RGVC342	2022NBT-12393_1	16	1	2561	Viruses	Duplodnaviria	Heunggongvirae	Uroviricota	Caudoviricetes
RGVC343	2022NBT-12410	21	0.8888	2561	Viruses	Duplodnaviria	Heunggongvirae	Uroviricota	Caudoviricetes
RGVC344	2022NBT-12423	22	1	2561	Viruses	Duplodnaviria	Heunggongvirae	Uroviricota	Caudoviricetes
RGVC345	2022NBT-1243	44	0.9825	2561	Viruses	Duplodnaviria	Heunggongvirae	Uroviricota	Caudoviricetes
RGVC346	2022NBT-124319	5	1	8016	Viruses	Monodnaviria	Loebvirae	Hofneiviricota	Faserviricetes	Tubulavirales	Inoviridae
RGVC347	2022NBT-124324	7	1	2561	Viruses	Duplodnaviria	Heunggongvirae	Uroviricota	Caudoviricetes
RGVC348	2022NBT-12436	12	0.9361	2561	Viruses	Duplodnaviria	Heunggongvirae	Uroviricota	Caudoviricetes
RGVC350	2022NBT-12445_1	19	1	2561	Viruses	Duplodnaviria	Heunggongvirae	Uroviricota	Caudoviricetes
RGVC351	2022NBT-124538	7	1	2561	Viruses	Duplodnaviria	Heunggongvirae	Uroviricota	Caudoviricetes
RGVC352	2022NBT-12455	14	0.9619	2561	Viruses	Duplodnaviria	Heunggongvirae	Uroviricota	Caudoviricetes
RGVC353	2022NBT-12457	37	0.9857	2561	Viruses	Duplodnaviria	Heunggongvirae	Uroviricota	Caudoviricetes
RGVC354	2022NBT-1246	72	1	2561	Viruses	Duplodnaviria	Heunggongvirae	Uroviricota	Caudoviricetes
RGVC355	2022NBT-124601	3	0.7108	2561	Viruses	Duplodnaviria	Heunggongvirae	Uroviricota	Caudoviricetes
RGVC356	2022NBT-12468	23	1	2561	Viruses	Duplodnaviria	Heunggongvirae	Uroviricota	Caudoviricetes
RGVC357	2022NBT-12475	10	1	2561	Viruses	Duplodnaviria	Heunggongvirae	Uroviricota	Caudoviricetes
RGVC358	2022NBT-12483	36	1	2561	Viruses	Duplodnaviria	Heunggongvirae	Uroviricota	Caudoviricetes
RGVC359	2022NBT-12495	50	1	2561	Viruses	Duplodnaviria	Heunggongvirae	Uroviricota	Caudoviricetes
RGVC360	2022NBT-125_1	41	1	2561	Viruses	Duplodnaviria	Heunggongvirae	Uroviricota	Caudoviricetes
RGVC361	2022NBT-12516_1	37	1	2561	Viruses	Duplodnaviria	Heunggongvirae	Uroviricota	Caudoviricetes
RGVC362	2022NBT-125356	5	0.8486	7662	Viruses	Varidnaviria	Bamfordvirae	Preplasmiviricota	Tectiliviricetes	Kalamavirales	Tectiviridae
RGVC363	2022NBT-12539	21	1	2561	Viruses	Duplodnaviria	Heunggongvirae	Uroviricota	Caudoviricetes
RGVC364	2022NBT-1254	47	0.9751	2561	Viruses	Duplodnaviria	Heunggongvirae	Uroviricota	Caudoviricetes
RGVC365	2022NBT-1255	62	0.9874	2561	Viruses	Duplodnaviria	Heunggongvirae	Uroviricota	Caudoviricetes
RGVC366	2022NBT-12563	13	1	2561	Viruses	Duplodnaviria	Heunggongvirae	Uroviricota	Caudoviricetes
RGVC367	2022NBT-12564	30	1	2561	Viruses	Duplodnaviria	Heunggongvirae	Uroviricota	Caudoviricetes
RGVC368	2022NBT-12566	16	1	2561	Viruses	Duplodnaviria	Heunggongvirae	Uroviricota	Caudoviricetes
RGVC369	2022NBT-125666	2	1	1	Viruses
RGVC370	2022NBT-1257	59	0.9893	2561	Viruses	Duplodnaviria	Heunggongvirae	Uroviricota	Caudoviricetes
RGVC371	2022NBT-12577_1	24	1	2561	Viruses	Duplodnaviria	Heunggongvirae	Uroviricota	Caudoviricetes
RGVC372	2022NBT-1258	80	0.9922	2561	Viruses	Duplodnaviria	Heunggongvirae	Uroviricota	Caudoviricetes
RGVC373	2022NBT-12587_1	26	1	2561	Viruses	Duplodnaviria	Heunggongvirae	Uroviricota	Caudoviricetes
RGVC374	2022NBT-12589_1	36	1	2561	Viruses	Duplodnaviria	Heunggongvirae	Uroviricota	Caudoviricetes
RGVC375	2022NBT-126	71	0.9763	2561	Viruses	Duplodnaviria	Heunggongvirae	Uroviricota	Caudoviricetes
RGVC376	2022NBT-126266	9	1	2561	Viruses	Duplodnaviria	Heunggongvirae	Uroviricota	Caudoviricetes
RGVC377	2022NBT-12628	11	0.9529	2561	Viruses	Duplodnaviria	Heunggongvirae	Uroviricota	Caudoviricetes
RGVC378	2022NBT-126358	8	1	2561	Viruses	Duplodnaviria	Heunggongvirae	Uroviricota	Caudoviricetes
RGVC379	2022NBT-12636	22	1	2561	Viruses	Duplodnaviria	Heunggongvirae	Uroviricota	Caudoviricetes
RGVC381	2022NBT-1266	65	0.9782	2561	Viruses	Duplodnaviria	Heunggongvirae	Uroviricota	Caudoviricetes
RGVC382	2022NBT-126696	2	1	2561	Viruses	Duplodnaviria	Heunggongvirae	Uroviricota	Caudoviricetes
RGVC383	2022NBT-1267	65	0.9891	2561	Viruses	Duplodnaviria	Heunggongvirae	Uroviricota	Caudoviricetes
RGVC384	2022NBT-12672	13	1	2561	Viruses	Duplodnaviria	Heunggongvirae	Uroviricota	Caudoviricetes
RGVC385	2022NBT-126720	1	1	2561	Viruses	Duplodnaviria	Heunggongvirae	Uroviricota	Caudoviricetes
RGVC386	2022NBT-12676	14	0.9115	2561	Viruses	Duplodnaviria	Heunggongvirae	Uroviricota	Caudoviricetes
RGVC388	2022NBT-12716	15	0.9384	2561	Viruses	Duplodnaviria	Heunggongvirae	Uroviricota	Caudoviricetes
RGVC389	2022NBT-12724	9	1	2561	Viruses	Duplodnaviria	Heunggongvirae	Uroviricota	Caudoviricetes
RGVC390	2022NBT-12727	26	1	2561	Viruses	Duplodnaviria	Heunggongvirae	Uroviricota	Caudoviricetes
RGVC391	2022NBT-12743	46	1	2561	Viruses	Duplodnaviria	Heunggongvirae	Uroviricota	Caudoviricetes
RGVC392	2022NBT-12745	21	1	2561	Viruses	Duplodnaviria	Heunggongvirae	Uroviricota	Caudoviricetes
RGVC393	2022NBT-1275	83	0.9778	2561	Viruses	Duplodnaviria	Heunggongvirae	Uroviricota	Caudoviricetes
RGVC394	2022NBT-12757	18	0.9823	2561	Viruses	Duplodnaviria	Heunggongvirae	Uroviricota	Caudoviricetes
RGVC395	2022NBT-12761	24	1	2561	Viruses	Duplodnaviria	Heunggongvirae	Uroviricota	Caudoviricetes
RGVC396	2022NBT-1278	63	0.9508	2561	Viruses	Duplodnaviria	Heunggongvirae	Uroviricota	Caudoviricetes
RGVC397	2022NBT-12781_1	26	1	2561	Viruses	Duplodnaviria	Heunggongvirae	Uroviricota	Caudoviricetes
RGVC398	2022NBT-12783	77	1	2561	Viruses	Duplodnaviria	Heunggongvirae	Uroviricota	Caudoviricetes
RGVC399	2022NBT-12792_1	47	1	2561	Viruses	Duplodnaviria	Heunggongvirae	Uroviricota	Caudoviricetes
RGVC400	2022NBT-127995	3	1	2561	Viruses	Duplodnaviria	Heunggongvirae	Uroviricota	Caudoviricetes
RGVC401	2022NBT-128	90	0.978	2561	Viruses	Duplodnaviria	Heunggongvirae	Uroviricota	Caudoviricetes
RGVC402	2022NBT-1282	60	0.9653	2561	Viruses	Duplodnaviria	Heunggongvirae	Uroviricota	Caudoviricetes
RGVC403	2022NBT-12839	14	1	2561	Viruses	Duplodnaviria	Heunggongvirae	Uroviricota	Caudoviricetes
RGVC404	2022NBT-12844	13	1	2561	Viruses	Duplodnaviria	Heunggongvirae	Uroviricota	Caudoviricetes
RGVC405	2022NBT-12848	27	1	2561	Viruses	Duplodnaviria	Heunggongvirae	Uroviricota	Caudoviricetes
RGVC406	2022NBT-12899	7	1	2561	Viruses	Duplodnaviria	Heunggongvirae	Uroviricota	Caudoviricetes
RGVC407	2022NBT-1292	84	0.9385	2561	Viruses	Duplodnaviria	Heunggongvirae	Uroviricota	Caudoviricetes
RGVC408	2022NBT-12923	12	0.937	2561	Viruses	Duplodnaviria	Heunggongvirae	Uroviricota	Caudoviricetes
RGVC409	2022NBT-12928_1	28	1	2561	Viruses	Duplodnaviria	Heunggongvirae	Uroviricota	Caudoviricetes
RGVC410	2022NBT-12945	8	1	2561	Viruses	Duplodnaviria	Heunggongvirae	Uroviricota	Caudoviricetes
RGVC411	2022NBT-1296	54	1	2561	Viruses	Duplodnaviria	Heunggongvirae	Uroviricota	Caudoviricetes
RGVC412	2022NBT-12972	20	1	2561	Viruses	Duplodnaviria	Heunggongvirae	Uroviricota	Caudoviricetes
RGVC413	2022NBT-12977	12	1	2561	Viruses	Duplodnaviria	Heunggongvirae	Uroviricota	Caudoviricetes
RGVC414	2022NBT-1298	44	1	2561	Viruses	Duplodnaviria	Heunggongvirae	Uroviricota	Caudoviricetes
RGVC415	2022NBT-12980	94	1	2561	Viruses	Duplodnaviria	Heunggongvirae	Uroviricota	Caudoviricetes
RGVC416	2022NBT-12987	9	0.9067	2561	Viruses	Duplodnaviria	Heunggongvirae	Uroviricota	Caudoviricetes
RGVC417	2022NBT-12989	10	1	2561	Viruses	Duplodnaviria	Heunggongvirae	Uroviricota	Caudoviricetes
RGVC418	2022NBT-12992	11	0.9672	2561	Viruses	Duplodnaviria	Heunggongvirae	Uroviricota	Caudoviricetes
RGVC419	2022NBT-129957	1	1	4934	Viruses	Monodnaviria	Shotokuvirae	Cressdnaviricota	Arfiviricetes	Cirlivirales
RGVC420	2022NBT-13	121	0.9843	2561	Viruses	Duplodnaviria	Heunggongvirae	Uroviricota	Caudoviricetes
RGVC421	2022NBT-130	106	0.971	2561	Viruses	Duplodnaviria	Heunggongvirae	Uroviricota	Caudoviricetes
RGVC422	2022NBT-1300_1	27	1	2561	Viruses	Duplodnaviria	Heunggongvirae	Uroviricota	Caudoviricetes
RGVC423	2022NBT-1304	63	0.9939	2561	Viruses	Duplodnaviria	Heunggongvirae	Uroviricota	Caudoviricetes
RGVC424	2022NBT-130422	2	1	2561	Viruses	Duplodnaviria	Heunggongvirae	Uroviricota	Caudoviricetes
RGVC425	2022NBT-13046	27	0.9183	2561	Viruses	Duplodnaviria	Heunggongvirae	Uroviricota	Caudoviricetes
RGVC426	2022NBT-130892	2	1	1	Viruses
RGVC427	2022NBT-1309	68	0.9777	2561	Viruses	Duplodnaviria	Heunggongvirae	Uroviricota	Caudoviricetes
RGVC428	2022NBT-13104	7	1	2561	Viruses	Duplodnaviria	Heunggongvirae	Uroviricota	Caudoviricetes
RGVC429	2022NBT-13113	13	1	2561	Viruses	Duplodnaviria	Heunggongvirae	Uroviricota	Caudoviricetes
RGVC430	2022NBT-13114	14	0.9651	2561	Viruses	Duplodnaviria	Heunggongvirae	Uroviricota	Caudoviricetes
RGVC431	2022NBT-1312_1	16	1	2561	Viruses	Duplodnaviria	Heunggongvirae	Uroviricota	Caudoviricetes
RGVC432	2022NBT-13126_1	25	1	2561	Viruses	Duplodnaviria	Heunggongvirae	Uroviricota	Caudoviricetes
RGVC433	2022NBT-13132	14	1	2561	Viruses	Duplodnaviria	Heunggongvirae	Uroviricota	Caudoviricetes
RGVC434	2022NBT-13141	6	1	2561	Viruses	Duplodnaviria	Heunggongvirae	Uroviricota	Caudoviricetes
RGVC435	2022NBT-13142	95	1	2561	Viruses	Duplodnaviria	Heunggongvirae	Uroviricota	Caudoviricetes
RGVC436	2022NBT-13144	23	0.9439	2561	Viruses	Duplodnaviria	Heunggongvirae	Uroviricota	Caudoviricetes
RGVC437	2022NBT-132015	4	1	8016	Viruses	Monodnaviria	Loebvirae	Hofneiviricota	Faserviricetes	Tubulavirales	Inoviridae
RGVC438	2022NBT-13209	25	1	2561	Viruses	Duplodnaviria	Heunggongvirae	Uroviricota	Caudoviricetes
RGVC439	2022NBT-132348	1	1	2561	Viruses	Duplodnaviria	Heunggongvirae	Uroviricota	Caudoviricetes
RGVC440	2022NBT-132384	3	1	8016	Viruses	Monodnaviria	Loebvirae	Hofneiviricota	Faserviricetes	Tubulavirales	Inoviridae
RGVC441	2022NBT-13240	91	1	2561	Viruses	Duplodnaviria	Heunggongvirae	Uroviricota	Caudoviricetes
RGVC443	2022NBT-1325	62	1	2561	Viruses	Duplodnaviria	Heunggongvirae	Uroviricota	Caudoviricetes
RGVC444	2022NBT-13255	16	1	2561	Viruses	Duplodnaviria	Heunggongvirae	Uroviricota	Caudoviricetes
RGVC445	2022NBT-13298	24	1	2561	Viruses	Duplodnaviria	Heunggongvirae	Uroviricota	Caudoviricetes
RGVC446	2022NBT-133	91	0.9868	2561	Viruses	Duplodnaviria	Heunggongvirae	Uroviricota	Caudoviricetes
RGVC447	2022NBT-13309	18	1	2561	Viruses	Duplodnaviria	Heunggongvirae	Uroviricota	Caudoviricetes
RGVC448	2022NBT-1332_1	78	1	2561	Viruses	Duplodnaviria	Heunggongvirae	Uroviricota	Caudoviricetes
RGVC449	2022NBT-13323_1	30	1	2561	Viruses	Duplodnaviria	Heunggongvirae	Uroviricota	Caudoviricetes
RGVC450	2022NBT-13336	15	1	2561	Viruses	Duplodnaviria	Heunggongvirae	Uroviricota	Caudoviricetes
RGVC451	2022NBT-13340	47	1	2561	Viruses	Duplodnaviria	Heunggongvirae	Uroviricota	Caudoviricetes
RGVC452	2022NBT-13346_1	40	1	2561	Viruses	Duplodnaviria	Heunggongvirae	Uroviricota	Caudoviricetes
RGVC453	2022NBT-1335	57	0.9876	2561	Viruses	Duplodnaviria	Heunggongvirae	Uroviricota	Caudoviricetes
RGVC454	2022NBT-13355_1	59	1	2561	Viruses	Duplodnaviria	Heunggongvirae	Uroviricota	Caudoviricetes
RGVC455	2022NBT-13367	22	0.9698	2561	Viruses	Duplodnaviria	Heunggongvirae	Uroviricota	Caudoviricetes
RGVC456	2022NBT-1338	55	0.9743	2561	Viruses	Duplodnaviria	Heunggongvirae	Uroviricota	Caudoviricetes
RGVC457	2022NBT-13403	21	0.9804	2561	Viruses	Duplodnaviria	Heunggongvirae	Uroviricota	Caudoviricetes
RGVC458	2022NBT-13408_1	15	1	2561	Viruses	Duplodnaviria	Heunggongvirae	Uroviricota	Caudoviricetes
RGVC459	2022NBT-13418_1	46	1	2561	Viruses	Duplodnaviria	Heunggongvirae	Uroviricota	Caudoviricetes
RGVC460	2022NBT-1342	46	0.9176	2561	Viruses	Duplodnaviria	Heunggongvirae	Uroviricota	Caudoviricetes
RGVC461	2022NBT-13420	13	1	2561	Viruses	Duplodnaviria	Heunggongvirae	Uroviricota	Caudoviricetes
RGVC462	2022NBT-13424_1	25	1	2561	Viruses	Duplodnaviria	Heunggongvirae	Uroviricota	Caudoviricetes
RGVC463	2022NBT-1343	37	0.9683	2561	Viruses	Duplodnaviria	Heunggongvirae	Uroviricota	Caudoviricetes
RGVC464	2022NBT-1344	59	0.9863	2561	Viruses	Duplodnaviria	Heunggongvirae	Uroviricota	Caudoviricetes
RGVC465	2022NBT-13442	101	1	2561	Viruses	Duplodnaviria	Heunggongvirae	Uroviricota	Caudoviricetes
RGVC466	2022NBT-13448	8	1	2561	Viruses	Duplodnaviria	Heunggongvirae	Uroviricota	Caudoviricetes
RGVC467	2022NBT-13476	17	0.9549	2561	Viruses	Duplodnaviria	Heunggongvirae	Uroviricota	Caudoviricetes
RGVC468	2022NBT-13493	24	0.9736	2561	Viruses	Duplodnaviria	Heunggongvirae	Uroviricota	Caudoviricetes
RGVC469	2022NBT-13495	20	1	2561	Viruses	Duplodnaviria	Heunggongvirae	Uroviricota	Caudoviricetes
RGVC470	2022NBT-1350	99	0.9444	2561	Viruses	Duplodnaviria	Heunggongvirae	Uroviricota	Caudoviricetes
RGVC471	2022NBT-135192	5	0.785	1763	Viruses	Monodnaviria
RGVC472	2022NBT-1352	60	0.9561	2561	Viruses	Duplodnaviria	Heunggongvirae	Uroviricota	Caudoviricetes
RGVC473	2022NBT-13523	93	1	2561	Viruses	Duplodnaviria	Heunggongvirae	Uroviricota	Caudoviricetes
RGVC474	2022NBT-13529	14	1	2561	Viruses	Duplodnaviria	Heunggongvirae	Uroviricota	Caudoviricetes
RGVC475	2022NBT-135456	3	1	1	Viruses
RGVC476	2022NBT-13547_1	23	1	2561	Viruses	Duplodnaviria	Heunggongvirae	Uroviricota	Caudoviricetes
RGVC477	2022NBT-1356	81	0.9168	2561	Viruses	Duplodnaviria	Heunggongvirae	Uroviricota	Caudoviricetes
RGVC478	2022NBT-13564	64	1	2561	Viruses	Duplodnaviria	Heunggongvirae	Uroviricota	Caudoviricetes
RGVC479	2022NBT-1357	88	0.9686	2561	Viruses	Duplodnaviria	Heunggongvirae	Uroviricota	Caudoviricetes
RGVC480	2022NBT-13570	12	1	2561	Viruses	Duplodnaviria	Heunggongvirae	Uroviricota	Caudoviricetes
RGVC481	2022NBT-13590	17	0.9733	2561	Viruses	Duplodnaviria	Heunggongvirae	Uroviricota	Caudoviricetes
RGVC483	2022NBT-136045	2	0.7624	7220	Viruses	Monodnaviria	Shotokuvirae	Cressdnaviricota	Arfiviricetes	Cirlivirales	Circoviridae
RGVC484	2022NBT-13613_1	29	1	2561	Viruses	Duplodnaviria	Heunggongvirae	Uroviricota	Caudoviricetes
RGVC485	2022NBT-13636	11	1	2561	Viruses	Duplodnaviria	Heunggongvirae	Uroviricota	Caudoviricetes
RGVC486	2022NBT-1364	58	0.9897	2561	Viruses	Duplodnaviria	Heunggongvirae	Uroviricota	Caudoviricetes
RGVC487	2022NBT-13640	13	1	2561	Viruses	Duplodnaviria	Heunggongvirae	Uroviricota	Caudoviricetes
RGVC488	2022NBT-136434	2	1	1763	Viruses	Monodnaviria
RGVC489	2022NBT-13647	7	1	2561	Viruses	Duplodnaviria	Heunggongvirae	Uroviricota	Caudoviricetes
RGVC490	2022NBT-136485	2	0.7773	7220	Viruses	Monodnaviria	Shotokuvirae	Cressdnaviricota	Arfiviricetes	Cirlivirales	Circoviridae
RGVC491	2022NBT-1365	54	1	2561	Viruses	Duplodnaviria	Heunggongvirae	Uroviricota	Caudoviricetes
RGVC492	2022NBT-13667	11	0.8136	2561	Viruses	Duplodnaviria	Heunggongvirae	Uroviricota	Caudoviricetes
RGVC493	2022NBT-13671	25	0.9847	2561	Viruses	Duplodnaviria	Heunggongvirae	Uroviricota	Caudoviricetes
RGVC494	2022NBT-13675	34	1	2561	Viruses	Duplodnaviria	Heunggongvirae	Uroviricota	Caudoviricetes
RGVC495	2022NBT-1368	73	0.9678	2561	Viruses	Duplodnaviria	Heunggongvirae	Uroviricota	Caudoviricetes
RGVC496	2022NBT-13683_1	24	1	2561	Viruses	Duplodnaviria	Heunggongvirae	Uroviricota	Caudoviricetes
RGVC497	2022NBT-13693	19	1	2561	Viruses	Duplodnaviria	Heunggongvirae	Uroviricota	Caudoviricetes
RGVC498	2022NBT-13721	91	1	2561	Viruses	Duplodnaviria	Heunggongvirae	Uroviricota	Caudoviricetes
RGVC499	2022NBT-1373	67	0.9745	2561	Viruses	Duplodnaviria	Heunggongvirae	Uroviricota	Caudoviricetes
RGVC500	2022NBT-1375_2	31	1	2561	Viruses	Duplodnaviria	Heunggongvirae	Uroviricota	Caudoviricetes
RGVC501	2022NBT-13755	18	0.9648	2561	Viruses	Duplodnaviria	Heunggongvirae	Uroviricota	Caudoviricetes
RGVC502	2022NBT-13760	17	1	2561	Viruses	Duplodnaviria	Heunggongvirae	Uroviricota	Caudoviricetes
RGVC503	2022NBT-13766_1	44	1	2561	Viruses	Duplodnaviria	Heunggongvirae	Uroviricota	Caudoviricetes
RGVC504	2022NBT-1377	54	0.9806	2561	Viruses	Duplodnaviria	Heunggongvirae	Uroviricota	Caudoviricetes
RGVC505	2022NBT-13783	78	1	2561	Viruses	Duplodnaviria	Heunggongvirae	Uroviricota	Caudoviricetes
RGVC506	2022NBT-1379	100	0.9783	2561	Viruses	Duplodnaviria	Heunggongvirae	Uroviricota	Caudoviricetes
RGVC507	2022NBT-13802	14	0.76	2561	Viruses	Duplodnaviria	Heunggongvirae	Uroviricota	Caudoviricetes
RGVC508	2022NBT-13807_1	32	1	2561	Viruses	Duplodnaviria	Heunggongvirae	Uroviricota	Caudoviricetes
RGVC509	2022NBT-13808	16	0.9384	2561	Viruses	Duplodnaviria	Heunggongvirae	Uroviricota	Caudoviricetes
RGVC510	2022NBT-1382_1	36	1	2561	Viruses	Duplodnaviria	Heunggongvirae	Uroviricota	Caudoviricetes
RGVC511	2022NBT-1384	56	0.9857	2561	Viruses	Duplodnaviria	Heunggongvirae	Uroviricota	Caudoviricetes
RGVC512	2022NBT-13844	18	1	2561	Viruses	Duplodnaviria	Heunggongvirae	Uroviricota	Caudoviricetes
RGVC513	2022NBT-1385	57	1	2561	Viruses	Duplodnaviria	Heunggongvirae	Uroviricota	Caudoviricetes
RGVC514	2022NBT-13866	19	1	2561	Viruses	Duplodnaviria	Heunggongvirae	Uroviricota	Caudoviricetes
RGVC515	2022NBT-13868	22	0.9851	2561	Viruses	Duplodnaviria	Heunggongvirae	Uroviricota	Caudoviricetes
RGVC516	2022NBT-1390	54	0.9922	2561	Viruses	Duplodnaviria	Heunggongvirae	Uroviricota	Caudoviricetes
RGVC517	2022NBT-139054	3	0.7735	2561	Viruses	Duplodnaviria	Heunggongvirae	Uroviricota	Caudoviricetes
RGVC518	2022NBT-13925	95	1	2561	Viruses	Duplodnaviria	Heunggongvirae	Uroviricota	Caudoviricetes
RGVC519	2022NBT-13927	63	1	2561	Viruses	Duplodnaviria	Heunggongvirae	Uroviricota	Caudoviricetes
RGVC520	2022NBT-139282	1	1	2561	Viruses	Duplodnaviria	Heunggongvirae	Uroviricota	Caudoviricetes
RGVC521	2022NBT-1393	64	0.9747	2561	Viruses	Duplodnaviria	Heunggongvirae	Uroviricota	Caudoviricetes
RGVC522	2022NBT-13931	86	1	2561	Viruses	Duplodnaviria	Heunggongvirae	Uroviricota	Caudoviricetes
RGVC523	2022NBT-13953	22	1	2561	Viruses	Duplodnaviria	Heunggongvirae	Uroviricota	Caudoviricetes
RGVC524	2022NBT-1396	66	0.9467	2561	Viruses	Duplodnaviria	Heunggongvirae	Uroviricota	Caudoviricetes
RGVC525	2022NBT-139702	1	1	4934	Viruses	Monodnaviria	Shotokuvirae	Cressdnaviricota	Arfiviricetes	Cirlivirales
RGVC526	2022NBT-14	126	0.9859	2561	Viruses	Duplodnaviria	Heunggongvirae	Uroviricota	Caudoviricetes
RGVC527	2022NBT-14002	14	0.9139	2561	Viruses	Duplodnaviria	Heunggongvirae	Uroviricota	Caudoviricetes
RGVC528	2022NBT-14009_1	90	1	2561	Viruses	Duplodnaviria	Heunggongvirae	Uroviricota	Caudoviricetes
RGVC529	2022NBT-14014	19	0.9821	2561	Viruses	Duplodnaviria	Heunggongvirae	Uroviricota	Caudoviricetes
RGVC530	2022NBT-1403	51	1	2561	Viruses	Duplodnaviria	Heunggongvirae	Uroviricota	Caudoviricetes
RGVC531	2022NBT-14036_1	27	1	2561	Viruses	Duplodnaviria	Heunggongvirae	Uroviricota	Caudoviricetes
RGVC532	2022NBT-14039	26	0.8464	2561	Viruses	Duplodnaviria	Heunggongvirae	Uroviricota	Caudoviricetes
RGVC533	2022NBT-1404	64	0.9236	2561	Viruses	Duplodnaviria	Heunggongvirae	Uroviricota	Caudoviricetes
RGVC534	2022NBT-14044_1	27	1	2561	Viruses	Duplodnaviria	Heunggongvirae	Uroviricota	Caudoviricetes
RGVC535	2022NBT-1405	42	0.9769	2561	Viruses	Duplodnaviria	Heunggongvirae	Uroviricota	Caudoviricetes
RGVC536	2022NBT-14067	11	0.9243	2561	Viruses	Duplodnaviria	Heunggongvirae	Uroviricota	Caudoviricetes
RGVC537	2022NBT-14074_1	32	1	2561	Viruses	Duplodnaviria	Heunggongvirae	Uroviricota	Caudoviricetes
RGVC538	2022NBT-140830	2	0.7337	7220	Viruses	Monodnaviria	Shotokuvirae	Cressdnaviricota	Arfiviricetes	Cirlivirales	Circoviridae
RGVC539	2022NBT-141	74	0.9889	2561	Viruses	Duplodnaviria	Heunggongvirae	Uroviricota	Caudoviricetes
RGVC540	2022NBT-14100_1	24	1	2561	Viruses	Duplodnaviria	Heunggongvirae	Uroviricota	Caudoviricetes
RGVC541	2022NBT-141140	4	1	8016	Viruses	Monodnaviria	Loebvirae	Hofneiviricota	Faserviricetes	Tubulavirales	Inoviridae
RGVC542	2022NBT-14118_1	30	1	2561	Viruses	Duplodnaviria	Heunggongvirae	Uroviricota	Caudoviricetes
RGVC543	2022NBT-14118_2	38	1	2561	Viruses	Duplodnaviria	Heunggongvirae	Uroviricota	Caudoviricetes
RGVC544	2022NBT-14124	17	1	2561	Viruses	Duplodnaviria	Heunggongvirae	Uroviricota	Caudoviricetes
RGVC545	2022NBT-14127_1	21	1	2561	Viruses	Duplodnaviria	Heunggongvirae	Uroviricota	Caudoviricetes
RGVC546	2022NBT-1413	58	0.9778	2561	Viruses	Duplodnaviria	Heunggongvirae	Uroviricota	Caudoviricetes
RGVC547	2022NBT-14138	14	1	2561	Viruses	Duplodnaviria	Heunggongvirae	Uroviricota	Caudoviricetes
RGVC548	2022NBT-14139_1	70	1	2561	Viruses	Duplodnaviria	Heunggongvirae	Uroviricota	Caudoviricetes
RGVC549	2022NBT-141522	10	1	2561	Viruses	Duplodnaviria	Heunggongvirae	Uroviricota	Caudoviricetes
RGVC550	2022NBT-1416	70	0.9893	2561	Viruses	Duplodnaviria	Heunggongvirae	Uroviricota	Caudoviricetes
RGVC551	2022NBT-14169_1	50	1	2561	Viruses	Duplodnaviria	Heunggongvirae	Uroviricota	Caudoviricetes
RGVC552	2022NBT-14183	19	1	2561	Viruses	Duplodnaviria	Heunggongvirae	Uroviricota	Caudoviricetes
RGVC553	2022NBT-14204	14	0.749	2561	Viruses	Duplodnaviria	Heunggongvirae	Uroviricota	Caudoviricetes
RGVC554	2022NBT-14229	19	0.9058	2561	Viruses	Duplodnaviria	Heunggongvirae	Uroviricota	Caudoviricetes
RGVC555	2022NBT-14235_1	29	0.9868	2561	Viruses	Duplodnaviria	Heunggongvirae	Uroviricota	Caudoviricetes
RGVC556	2022NBT-14244	7	1	2561	Viruses	Duplodnaviria	Heunggongvirae	Uroviricota	Caudoviricetes
RGVC557	2022NBT-1425	78	0.9862	2561	Viruses	Duplodnaviria	Heunggongvirae	Uroviricota	Caudoviricetes
RGVC558	2022NBT-14262_1	34	1	2561	Viruses	Duplodnaviria	Heunggongvirae	Uroviricota	Caudoviricetes
RGVC559	2022NBT-14263_1	25	1	2561	Viruses	Duplodnaviria	Heunggongvirae	Uroviricota	Caudoviricetes
RGVC560	2022NBT-14268	99	1	2561	Viruses	Duplodnaviria	Heunggongvirae	Uroviricota	Caudoviricetes
RGVC561	2022NBT-142929	7	1	2561	Viruses	Duplodnaviria	Heunggongvirae	Uroviricota	Caudoviricetes
RGVC563	2022NBT-14305	10	1	2561	Viruses	Duplodnaviria	Heunggongvirae	Uroviricota	Caudoviricetes
RGVC564	2022NBT-1431	58	0.9697	2561	Viruses	Duplodnaviria	Heunggongvirae	Uroviricota	Caudoviricetes
RGVC565	2022NBT-14314	12	1	2561	Viruses	Duplodnaviria	Heunggongvirae	Uroviricota	Caudoviricetes
RGVC566	2022NBT-143185	2	1	8016	Viruses	Monodnaviria	Loebvirae	Hofneiviricota	Faserviricetes	Tubulavirales	Inoviridae
RGVC567	2022NBT-14328	14	1	2561	Viruses	Duplodnaviria	Heunggongvirae	Uroviricota	Caudoviricetes
RGVC568	2022NBT-14330	20	1	2561	Viruses	Duplodnaviria	Heunggongvirae	Uroviricota	Caudoviricetes
RGVC569	2022NBT-1434	60	0.911	2561	Viruses	Duplodnaviria	Heunggongvirae	Uroviricota	Caudoviricetes
RGVC570	2022NBT-14343	11	0.8954	2561	Viruses	Duplodnaviria	Heunggongvirae	Uroviricota	Caudoviricetes
RGVC571	2022NBT-14380	9	1	2561	Viruses	Duplodnaviria	Heunggongvirae	Uroviricota	Caudoviricetes
RGVC572	2022NBT-14396	35	1	2561	Viruses	Duplodnaviria	Heunggongvirae	Uroviricota	Caudoviricetes
RGVC573	2022NBT-14419	89	1	2561	Viruses	Duplodnaviria	Heunggongvirae	Uroviricota	Caudoviricetes
RGVC574	2022NBT-14430	22	1	2561	Viruses	Duplodnaviria	Heunggongvirae	Uroviricota	Caudoviricetes
RGVC575	2022NBT-14445	18	0.9731	2561	Viruses	Duplodnaviria	Heunggongvirae	Uroviricota	Caudoviricetes
RGVC576	2022NBT-14455	6	1	2561	Viruses	Duplodnaviria	Heunggongvirae	Uroviricota	Caudoviricetes
RGVC577	2022NBT-1446_1	27	1	2561	Viruses	Duplodnaviria	Heunggongvirae	Uroviricota	Caudoviricetes
RGVC578	2022NBT-14463_1	30	1	2561	Viruses	Duplodnaviria	Heunggongvirae	Uroviricota	Caudoviricetes
RGVC579	2022NBT-1447	70	0.9813	2561	Viruses	Duplodnaviria	Heunggongvirae	Uroviricota	Caudoviricetes
RGVC580	2022NBT-144765	3	1	2561	Viruses	Duplodnaviria	Heunggongvirae	Uroviricota	Caudoviricetes
RGVC581	2022NBT-14510	12	1	2561	Viruses	Duplodnaviria	Heunggongvirae	Uroviricota	Caudoviricetes
RGVC582	2022NBT-1452	61	0.9919	2561	Viruses	Duplodnaviria	Heunggongvirae	Uroviricota	Caudoviricetes
RGVC583	2022NBT-14521	11	1	2561	Viruses	Duplodnaviria	Heunggongvirae	Uroviricota	Caudoviricetes
RGVC584	2022NBT-14529	100	1	2561	Viruses	Duplodnaviria	Heunggongvirae	Uroviricota	Caudoviricetes
RGVC585	2022NBT-1453	53	0.9924	2561	Viruses	Duplodnaviria	Heunggongvirae	Uroviricota	Caudoviricetes
RGVC586	2022NBT-14536	17	0.9388	2561	Viruses	Duplodnaviria	Heunggongvirae	Uroviricota	Caudoviricetes
RGVC587	2022NBT-14539	24	1	2561	Viruses	Duplodnaviria	Heunggongvirae	Uroviricota	Caudoviricetes
RGVC588	2022NBT-14547	20	1	2561	Viruses	Duplodnaviria	Heunggongvirae	Uroviricota	Caudoviricetes
RGVC589	2022NBT-14552	12	1	2561	Viruses	Duplodnaviria	Heunggongvirae	Uroviricota	Caudoviricetes
RGVC590	2022NBT-14564	16	0.9617	2561	Viruses	Duplodnaviria	Heunggongvirae	Uroviricota	Caudoviricetes
RGVC591	2022NBT-1459_1	37	1	2561	Viruses	Duplodnaviria	Heunggongvirae	Uroviricota	Caudoviricetes
RGVC592	2022NBT-14590	11	1	2561	Viruses	Duplodnaviria	Heunggongvirae	Uroviricota	Caudoviricetes
RGVC593	2022NBT-14602	85	0.9947	2561	Viruses	Duplodnaviria	Heunggongvirae	Uroviricota	Caudoviricetes
RGVC594	2022NBT-14611	16	0.9771	2561	Viruses	Duplodnaviria	Heunggongvirae	Uroviricota	Caudoviricetes
RGVC595	2022NBT-1462	83	0.9706	2561	Viruses	Duplodnaviria	Heunggongvirae	Uroviricota	Caudoviricetes
RGVC596	2022NBT-14639_1	33	1	2561	Viruses	Duplodnaviria	Heunggongvirae	Uroviricota	Caudoviricetes
RGVC597	2022NBT-14641	25	1	2561	Viruses	Duplodnaviria	Heunggongvirae	Uroviricota	Caudoviricetes
RGVC598	2022NBT-1465	52	0.9874	2561	Viruses	Duplodnaviria	Heunggongvirae	Uroviricota	Caudoviricetes
RGVC599	2022NBT-1466	48	0.9837	2561	Viruses	Duplodnaviria	Heunggongvirae	Uroviricota	Caudoviricetes
RGVC600	2022NBT-14667	12	0.9616	2561	Viruses	Duplodnaviria	Heunggongvirae	Uroviricota	Caudoviricetes
RGVC601	2022NBT-14678	27	1	2561	Viruses	Duplodnaviria	Heunggongvirae	Uroviricota	Caudoviricetes
RGVC602	2022NBT-1468	31	0.9821	2561	Viruses	Duplodnaviria	Heunggongvirae	Uroviricota	Caudoviricetes
RGVC603	2022NBT-1469	74	0.9561	2561	Viruses	Duplodnaviria	Heunggongvirae	Uroviricota	Caudoviricetes
RGVC604	2022NBT-147	110	0.9874	2561	Viruses	Duplodnaviria	Heunggongvirae	Uroviricota	Caudoviricetes
RGVC605	2022NBT-14724	17	0.9503	2561	Viruses	Duplodnaviria	Heunggongvirae	Uroviricota	Caudoviricetes
RGVC606	2022NBT-14730	16	1	2561	Viruses	Duplodnaviria	Heunggongvirae	Uroviricota	Caudoviricetes
RGVC607	2022NBT-14738_1	25	1	2561	Viruses	Duplodnaviria	Heunggongvirae	Uroviricota	Caudoviricetes
RGVC608	2022NBT-1474	56	0.9773	2561	Viruses	Duplodnaviria	Heunggongvirae	Uroviricota	Caudoviricetes
RGVC609	2022NBT-14746	16	0.9353	2561	Viruses	Duplodnaviria	Heunggongvirae	Uroviricota	Caudoviricetes
RGVC610	2022NBT-1476	77	0.9853	2561	Viruses	Duplodnaviria	Heunggongvirae	Uroviricota	Caudoviricetes
RGVC611	2022NBT-14784_1	89	1	2561	Viruses	Duplodnaviria	Heunggongvirae	Uroviricota	Caudoviricetes
RGVC612	2022NBT-14796	12	1	2561	Viruses	Duplodnaviria	Heunggongvirae	Uroviricota	Caudoviricetes
RGVC613	2022NBT-14799	14	0.9606	2561	Viruses	Duplodnaviria	Heunggongvirae	Uroviricota	Caudoviricetes
RGVC614	2022NBT-148	100	0.9894	2561	Viruses	Duplodnaviria	Heunggongvirae	Uroviricota	Caudoviricetes
RGVC615	2022NBT-1481	44	0.9723	2561	Viruses	Duplodnaviria	Heunggongvirae	Uroviricota	Caudoviricetes
RGVC616	2022NBT-14812	92	1	2561	Viruses	Duplodnaviria	Heunggongvirae	Uroviricota	Caudoviricetes
RGVC617	2022NBT-14815_1	40	1	2561	Viruses	Duplodnaviria	Heunggongvirae	Uroviricota	Caudoviricetes
RGVC618	2022NBT-14831	15	1	2561	Viruses	Duplodnaviria	Heunggongvirae	Uroviricota	Caudoviricetes
RGVC619	2022NBT-14849	87	1	2561	Viruses	Duplodnaviria	Heunggongvirae	Uroviricota	Caudoviricetes
RGVC620	2022NBT-14852	15	1	2561	Viruses	Duplodnaviria	Heunggongvirae	Uroviricota	Caudoviricetes
RGVC621	2022NBT-14895	17	1	2561	Viruses	Duplodnaviria	Heunggongvirae	Uroviricota	Caudoviricetes
RGVC622	2022NBT-149	93	0.9823	2561	Viruses	Duplodnaviria	Heunggongvirae	Uroviricota	Caudoviricetes
RGVC623	2022NBT-14905	7	1	2561	Viruses	Duplodnaviria	Heunggongvirae	Uroviricota	Caudoviricetes
RGVC624	2022NBT-14906	93	0.9976	2561	Viruses	Duplodnaviria	Heunggongvirae	Uroviricota	Caudoviricetes
RGVC625	2022NBT-14909	6	1	2561	Viruses	Duplodnaviria	Heunggongvirae	Uroviricota	Caudoviricetes
RGVC626	2022NBT-1493	86	0.9519	2561	Viruses	Duplodnaviria	Heunggongvirae	Uroviricota	Caudoviricetes
RGVC627	2022NBT-14941_1	34	1	2561	Viruses	Duplodnaviria	Heunggongvirae	Uroviricota	Caudoviricetes
RGVC628	2022NBT-149510	2	1	2561	Viruses	Duplodnaviria	Heunggongvirae	Uroviricota	Caudoviricetes
RGVC629	2022NBT-14967	9	1	2561	Viruses	Duplodnaviria	Heunggongvirae	Uroviricota	Caudoviricetes
RGVC630	2022NBT-14971	18	0.9153	2561	Viruses	Duplodnaviria	Heunggongvirae	Uroviricota	Caudoviricetes
RGVC631	2022NBT-1498	62	0.9742	2561	Viruses	Duplodnaviria	Heunggongvirae	Uroviricota	Caudoviricetes
RGVC632	2022NBT-1499	65	1	2561	Viruses	Duplodnaviria	Heunggongvirae	Uroviricota	Caudoviricetes
RGVC633	2022NBT-15	95	0.9846	2561	Viruses	Duplodnaviria	Heunggongvirae	Uroviricota	Caudoviricetes
RGVC634	2022NBT-150	115	0.9902	2561	Viruses	Duplodnaviria	Heunggongvirae	Uroviricota	Caudoviricetes
RGVC635	2022NBT-1500	51	1	2561	Viruses	Duplodnaviria	Heunggongvirae	Uroviricota	Caudoviricetes
RGVC636	2022NBT-15003	21	1	2561	Viruses	Duplodnaviria	Heunggongvirae	Uroviricota	Caudoviricetes
RGVC637	2022NBT-15029	14	0.8756	2561	Viruses	Duplodnaviria	Heunggongvirae	Uroviricota	Caudoviricetes
RGVC638	2022NBT-15055	23	0.9629	2561	Viruses	Duplodnaviria	Heunggongvirae	Uroviricota	Caudoviricetes
RGVC639	2022NBT-15077	14	1	2561	Viruses	Duplodnaviria	Heunggongvirae	Uroviricota	Caudoviricetes
RGVC640	2022NBT-15086	27	0.9652	2561	Viruses	Duplodnaviria	Heunggongvirae	Uroviricota	Caudoviricetes
RGVC641	2022NBT-15089	86	1	2561	Viruses	Duplodnaviria	Heunggongvirae	Uroviricota	Caudoviricetes
RGVC642	2022NBT-15092	78	1	2561	Viruses	Duplodnaviria	Heunggongvirae	Uroviricota	Caudoviricetes
RGVC643	2022NBT-15095_1	24	1	2561	Viruses	Duplodnaviria	Heunggongvirae	Uroviricota	Caudoviricetes
RGVC644	2022NBT-151	132	0.9725	2561	Viruses	Duplodnaviria	Heunggongvirae	Uroviricota	Caudoviricetes
RGVC645	2022NBT-1511_1	8	1	2561	Viruses	Duplodnaviria	Heunggongvirae	Uroviricota	Caudoviricetes
RGVC646	2022NBT-1512	56	1	2561	Viruses	Duplodnaviria	Heunggongvirae	Uroviricota	Caudoviricetes
RGVC647	2022NBT-1513	40	0.9894	2561	Viruses	Duplodnaviria	Heunggongvirae	Uroviricota	Caudoviricetes
RGVC648	2022NBT-15144_1	30	1	2561	Viruses	Duplodnaviria	Heunggongvirae	Uroviricota	Caudoviricetes
RGVC649	2022NBT-15149	16	0.9765	2561	Viruses	Duplodnaviria	Heunggongvirae	Uroviricota	Caudoviricetes
RGVC650	2022NBT-15157_1	24	1	2561	Viruses	Duplodnaviria	Heunggongvirae	Uroviricota	Caudoviricetes
RGVC651	2022NBT-1516	65	0.955	2561	Viruses	Duplodnaviria	Heunggongvirae	Uroviricota	Caudoviricetes
RGVC652	2022NBT-15172	19	1	2561	Viruses	Duplodnaviria	Heunggongvirae	Uroviricota	Caudoviricetes
RGVC653	2022NBT-151772	2	1	1	Viruses
RGVC654	2022NBT-1518	48	0.9889	2561	Viruses	Duplodnaviria	Heunggongvirae	Uroviricota	Caudoviricetes
RGVC655	2022NBT-15181	10	1	2561	Viruses	Duplodnaviria	Heunggongvirae	Uroviricota	Caudoviricetes
RGVC656	2022NBT-15184	10	1	2561	Viruses	Duplodnaviria	Heunggongvirae	Uroviricota	Caudoviricetes
RGVC657	2022NBT-15187	10	1	2561	Viruses	Duplodnaviria	Heunggongvirae	Uroviricota	Caudoviricetes
RGVC658	2022NBT-15192	17	0.9481	2561	Viruses	Duplodnaviria	Heunggongvirae	Uroviricota	Caudoviricetes
RGVC659	2022NBT-15196_1	37	1	2561	Viruses	Duplodnaviria	Heunggongvirae	Uroviricota	Caudoviricetes
RGVC660	2022NBT-15198	7	0.8526	2561	Viruses	Duplodnaviria	Heunggongvirae	Uroviricota	Caudoviricetes
RGVC661	2022NBT-152	94	1	2561	Viruses	Duplodnaviria	Heunggongvirae	Uroviricota	Caudoviricetes
RGVC662	2022NBT-15209_1	22	1	2561	Viruses	Duplodnaviria	Heunggongvirae	Uroviricota	Caudoviricetes
RGVC663	2022NBT-15224	45	1	2561	Viruses	Duplodnaviria	Heunggongvirae	Uroviricota	Caudoviricetes
RGVC664	2022NBT-15227	15	1	2561	Viruses	Duplodnaviria	Heunggongvirae	Uroviricota	Caudoviricetes
RGVC665	2022NBT-15228	35	1	2561	Viruses	Duplodnaviria	Heunggongvirae	Uroviricota	Caudoviricetes
RGVC666	2022NBT-15236_1	92	1	2561	Viruses	Duplodnaviria	Heunggongvirae	Uroviricota	Caudoviricetes
RGVC667	2022NBT-15248	54	1	2561	Viruses	Duplodnaviria	Heunggongvirae	Uroviricota	Caudoviricetes
RGVC668	2022NBT-15260_1	28	1	2561	Viruses	Duplodnaviria	Heunggongvirae	Uroviricota	Caudoviricetes
RGVC669	2022NBT-1528	65	0.9674	2561	Viruses	Duplodnaviria	Heunggongvirae	Uroviricota	Caudoviricetes
RGVC670	2022NBT-1529	39	0.9889	2561	Viruses	Duplodnaviria	Heunggongvirae	Uroviricota	Caudoviricetes
RGVC671	2022NBT-15293	17	0.97	2561	Viruses	Duplodnaviria	Heunggongvirae	Uroviricota	Caudoviricetes
RGVC672	2022NBT-153_1	33	1	2561	Viruses	Duplodnaviria	Heunggongvirae	Uroviricota	Caudoviricetes
RGVC673	2022NBT-1531_1	28	1	2561	Viruses	Duplodnaviria	Heunggongvirae	Uroviricota	Caudoviricetes
RGVC674	2022NBT-15321	4	1	2561	Viruses	Duplodnaviria	Heunggongvirae	Uroviricota	Caudoviricetes
RGVC675	2022NBT-15340_1	33	1	2561	Viruses	Duplodnaviria	Heunggongvirae	Uroviricota	Caudoviricetes
RGVC676	2022NBT-15366	8	1	2561	Viruses	Duplodnaviria	Heunggongvirae	Uroviricota	Caudoviricetes
RGVC677	2022NBT-15394	80	1	2561	Viruses	Duplodnaviria	Heunggongvirae	Uroviricota	Caudoviricetes
RGVC678	2022NBT-154	102	0.9873	2561	Viruses	Duplodnaviria	Heunggongvirae	Uroviricota	Caudoviricetes
RGVC679	2022NBT-1540	50	0.9916	2561	Viruses	Duplodnaviria	Heunggongvirae	Uroviricota	Caudoviricetes
RGVC680	2022NBT-15406_1	36	1	2561	Viruses	Duplodnaviria	Heunggongvirae	Uroviricota	Caudoviricetes
RGVC681	2022NBT-15412_2	40	1	2561	Viruses	Duplodnaviria	Heunggongvirae	Uroviricota	Caudoviricetes
RGVC682	2022NBT-15413	24	1	2561	Viruses	Duplodnaviria	Heunggongvirae	Uroviricota	Caudoviricetes
RGVC683	2022NBT-15415	37	1	2561	Viruses	Duplodnaviria	Heunggongvirae	Uroviricota	Caudoviricetes
RGVC684	2022NBT-1542	63	0.9387	2561	Viruses	Duplodnaviria	Heunggongvirae	Uroviricota	Caudoviricetes
RGVC685	2022NBT-15423	10	1	2561	Viruses	Duplodnaviria	Heunggongvirae	Uroviricota	Caudoviricetes
RGVC686	2022NBT-15429_1	28	1	2561	Viruses	Duplodnaviria	Heunggongvirae	Uroviricota	Caudoviricetes
RGVC687	2022NBT-15447	19	1	2561	Viruses	Duplodnaviria	Heunggongvirae	Uroviricota	Caudoviricetes
RGVC688	2022NBT-15453	15	1	2561	Viruses	Duplodnaviria	Heunggongvirae	Uroviricota	Caudoviricetes
RGVC689	2022NBT-15457	5	1	2561	Viruses	Duplodnaviria	Heunggongvirae	Uroviricota	Caudoviricetes
RGVC690	2022NBT-15462_1	15	0.9305	2561	Viruses	Duplodnaviria	Heunggongvirae	Uroviricota	Caudoviricetes
RGVC691	2022NBT-154697	1	1	2561	Viruses	Duplodnaviria	Heunggongvirae	Uroviricota	Caudoviricetes
RGVC692	2022NBT-1547	66	0.9929	2561	Viruses	Duplodnaviria	Heunggongvirae	Uroviricota	Caudoviricetes
RGVC693	2022NBT-15476	14	1	2561	Viruses	Duplodnaviria	Heunggongvirae	Uroviricota	Caudoviricetes
RGVC696	2022NBT-15495	11	1	2561	Viruses	Duplodnaviria	Heunggongvirae	Uroviricota	Caudoviricetes
RGVC697	2022NBT-15500_1	29	1	2561	Viruses	Duplodnaviria	Heunggongvirae	Uroviricota	Caudoviricetes
RGVC698	2022NBT-155221	1	1	4423	Viruses	Monodnaviria	Loebvirae	Hofneiviricota	Faserviricetes	Tubulavirales
RGVC699	2022NBT-15523_1	29	1	2561	Viruses	Duplodnaviria	Heunggongvirae	Uroviricota	Caudoviricetes
RGVC700	2022NBT-15526	12	1	2561	Viruses	Duplodnaviria	Heunggongvirae	Uroviricota	Caudoviricetes
RGVC701	2022NBT-15555_1	23	1	2561	Viruses	Duplodnaviria	Heunggongvirae	Uroviricota	Caudoviricetes
RGVC702	2022NBT-1556_1	30	1	2561	Viruses	Duplodnaviria	Heunggongvirae	Uroviricota	Caudoviricetes
RGVC703	2022NBT-155747	2	1	7220	Viruses	Monodnaviria	Shotokuvirae	Cressdnaviricota	Arfiviricetes	Cirlivirales	Circoviridae
RGVC704	2022NBT-1558	59	0.9872	2561	Viruses	Duplodnaviria	Heunggongvirae	Uroviricota	Caudoviricetes
RGVC705	2022NBT-15592	17	1	2561	Viruses	Duplodnaviria	Heunggongvirae	Uroviricota	Caudoviricetes
RGVC706	2022NBT-15593	81	1	2561	Viruses	Duplodnaviria	Heunggongvirae	Uroviricota	Caudoviricetes
RGVC707	2022NBT-156_1	28	1	2561	Viruses	Duplodnaviria	Heunggongvirae	Uroviricota	Caudoviricetes
RGVC708	2022NBT-1563	44	0.9274	2561	Viruses	Duplodnaviria	Heunggongvirae	Uroviricota	Caudoviricetes
RGVC709	2022NBT-156353	7	1	2790	Viruses	Monodnaviria	Sangervirae	Phixviricota	Malgrandaviricetes	Petitvirales	Microviridae
RGVC710	2022NBT-15644	64	1	2561	Viruses	Duplodnaviria	Heunggongvirae	Uroviricota	Caudoviricetes
RGVC711	2022NBT-15657	27	1	2561	Viruses	Duplodnaviria	Heunggongvirae	Uroviricota	Caudoviricetes
RGVC712	2022NBT-15662	18	1	2561	Viruses	Duplodnaviria	Heunggongvirae	Uroviricota	Caudoviricetes
RGVC713	2022NBT-15687_1	37	1	2561	Viruses	Duplodnaviria	Heunggongvirae	Uroviricota	Caudoviricetes
RGVC714	2022NBT-1571	66	0.9869	2561	Viruses	Duplodnaviria	Heunggongvirae	Uroviricota	Caudoviricetes
RGVC715	2022NBT-1572	80	0.9835	2561	Viruses	Duplodnaviria	Heunggongvirae	Uroviricota	Caudoviricetes
RGVC716	2022NBT-15723	12	0.8993	2561	Viruses	Duplodnaviria	Heunggongvirae	Uroviricota	Caudoviricetes
RGVC717	2022NBT-1573_1	47	1	2561	Viruses	Duplodnaviria	Heunggongvirae	Uroviricota	Caudoviricetes
RGVC718	2022NBT-15732	9	1	2561	Viruses	Duplodnaviria	Heunggongvirae	Uroviricota	Caudoviricetes
RGVC719	2022NBT-15733	15	0.9167	2561	Viruses	Duplodnaviria	Heunggongvirae	Uroviricota	Caudoviricetes
RGVC720	2022NBT-1574_1	20	1	2561	Viruses	Duplodnaviria	Heunggongvirae	Uroviricota	Caudoviricetes
RGVC721	2022NBT-15744	25	1	2561	Viruses	Duplodnaviria	Heunggongvirae	Uroviricota	Caudoviricetes
RGVC722	2022NBT-15747	25	1	2561	Viruses	Duplodnaviria	Heunggongvirae	Uroviricota	Caudoviricetes
RGVC723	2022NBT-15767_1	37	1	2561	Viruses	Duplodnaviria	Heunggongvirae	Uroviricota	Caudoviricetes
RGVC724	2022NBT-15768	12	1	2561	Viruses	Duplodnaviria	Heunggongvirae	Uroviricota	Caudoviricetes
RGVC725	2022NBT-1577	56	0.9775	2561	Viruses	Duplodnaviria	Heunggongvirae	Uroviricota	Caudoviricetes
RGVC726	2022NBT-15770	37	1	2561	Viruses	Duplodnaviria	Heunggongvirae	Uroviricota	Caudoviricetes
RGVC727	2022NBT-15774	82	1	2561	Viruses	Duplodnaviria	Heunggongvirae	Uroviricota	Caudoviricetes
RGVC728	2022NBT-1578_1	21	1	2561	Viruses	Duplodnaviria	Heunggongvirae	Uroviricota	Caudoviricetes
RGVC729	2022NBT-1579	38	0.9764	2561	Viruses	Duplodnaviria	Heunggongvirae	Uroviricota	Caudoviricetes
RGVC730	2022NBT-15812	8	1	2561	Viruses	Duplodnaviria	Heunggongvirae	Uroviricota	Caudoviricetes
RGVC731	2022NBT-15816	25	0.9537	2561	Viruses	Duplodnaviria	Heunggongvirae	Uroviricota	Caudoviricetes
RGVC732	2022NBT-1584	66	1	2561	Viruses	Duplodnaviria	Heunggongvirae	Uroviricota	Caudoviricetes
RGVC733	2022NBT-15855	14	1	2561	Viruses	Duplodnaviria	Heunggongvirae	Uroviricota	Caudoviricetes
RGVC734	2022NBT-15860	16	0.9419	2561	Viruses	Duplodnaviria	Heunggongvirae	Uroviricota	Caudoviricetes
RGVC735	2022NBT-15888	20	1	2561	Viruses	Duplodnaviria	Heunggongvirae	Uroviricota	Caudoviricetes
RGVC736	2022NBT-1589	52	0.9899	2561	Viruses	Duplodnaviria	Heunggongvirae	Uroviricota	Caudoviricetes
RGVC737	2022NBT-15910_1	15	0.9814	2561	Viruses	Duplodnaviria	Heunggongvirae	Uroviricota	Caudoviricetes
RGVC738	2022NBT-15911	17	0.9764	2561	Viruses	Duplodnaviria	Heunggongvirae	Uroviricota	Caudoviricetes
RGVC739	2022NBT-15913	22	0.979	2561	Viruses	Duplodnaviria	Heunggongvirae	Uroviricota	Caudoviricetes
RGVC740	2022NBT-1593	64	1	2561	Viruses	Duplodnaviria	Heunggongvirae	Uroviricota	Caudoviricetes
RGVC741	2022NBT-15934	17	0.973	2561	Viruses	Duplodnaviria	Heunggongvirae	Uroviricota	Caudoviricetes
RGVC742	2022NBT-1594	59	1	2561	Viruses	Duplodnaviria	Heunggongvirae	Uroviricota	Caudoviricetes
RGVC743	2022NBT-15951	8	1	2561	Viruses	Duplodnaviria	Heunggongvirae	Uroviricota	Caudoviricetes
RGVC744	2022NBT-15953	15	0.9471	2561	Viruses	Duplodnaviria	Heunggongvirae	Uroviricota	Caudoviricetes
RGVC745	2022NBT-15955	19	1	2561	Viruses	Duplodnaviria	Heunggongvirae	Uroviricota	Caudoviricetes
RGVC746	2022NBT-15959	2	1	2561	Viruses	Duplodnaviria	Heunggongvirae	Uroviricota	Caudoviricetes
RGVC747	2022NBT-1597	78	0.9952	2561	Viruses	Duplodnaviria	Heunggongvirae	Uroviricota	Caudoviricetes
RGVC748	2022NBT-15977	18	0.9587	2561	Viruses	Duplodnaviria	Heunggongvirae	Uroviricota	Caudoviricetes
RGVC749	2022NBT-15986_1	23	1	2561	Viruses	Duplodnaviria	Heunggongvirae	Uroviricota	Caudoviricetes
RGVC750	2022NBT-1601	58	0.9803	2561	Viruses	Duplodnaviria	Heunggongvirae	Uroviricota	Caudoviricetes
RGVC751	2022NBT-1602	45	0.9899	2561	Viruses	Duplodnaviria	Heunggongvirae	Uroviricota	Caudoviricetes
RGVC752	2022NBT-16026	14	0.951	2561	Viruses	Duplodnaviria	Heunggongvirae	Uroviricota	Caudoviricetes
RGVC753	2022NBT-16047	87	1	2561	Viruses	Duplodnaviria	Heunggongvirae	Uroviricota	Caudoviricetes
RGVC754	2022NBT-16055	91	0.9969	2561	Viruses	Duplodnaviria	Heunggongvirae	Uroviricota	Caudoviricetes
RGVC755	2022NBT-16058_1	48	1	2561	Viruses	Duplodnaviria	Heunggongvirae	Uroviricota	Caudoviricetes
RGVC756	2022NBT-1606	59	0.99	2561	Viruses	Duplodnaviria	Heunggongvirae	Uroviricota	Caudoviricetes
RGVC757	2022NBT-16064_1	12	1	2561	Viruses	Duplodnaviria	Heunggongvirae	Uroviricota	Caudoviricetes
RGVC758	2022NBT-1607	61	0.9555	2561	Viruses	Duplodnaviria	Heunggongvirae	Uroviricota	Caudoviricetes
RGVC759	2022NBT-1609	54	1	2561	Viruses	Duplodnaviria	Heunggongvirae	Uroviricota	Caudoviricetes
RGVC760	2022NBT-161	88	1	2561	Viruses	Duplodnaviria	Heunggongvirae	Uroviricota	Caudoviricetes
RGVC761	2022NBT-16100	96	1	2561	Viruses	Duplodnaviria	Heunggongvirae	Uroviricota	Caudoviricetes
RGVC762	2022NBT-16120_1	31	1	2561	Viruses	Duplodnaviria	Heunggongvirae	Uroviricota	Caudoviricetes
RGVC763	2022NBT-1613	74	0.9927	2561	Viruses	Duplodnaviria	Heunggongvirae	Uroviricota	Caudoviricetes
RGVC764	2022NBT-16137	87	1	2561	Viruses	Duplodnaviria	Heunggongvirae	Uroviricota	Caudoviricetes
RGVC765	2022NBT-162	70	0.9561	2561	Viruses	Duplodnaviria	Heunggongvirae	Uroviricota	Caudoviricetes
RGVC766	2022NBT-16200_1	29	1	2561	Viruses	Duplodnaviria	Heunggongvirae	Uroviricota	Caudoviricetes
RGVC767	2022NBT-16206	7	1	2561	Viruses	Duplodnaviria	Heunggongvirae	Uroviricota	Caudoviricetes
RGVC768	2022NBT-16210	28	0.9886	2561	Viruses	Duplodnaviria	Heunggongvirae	Uroviricota	Caudoviricetes
RGVC769	2022NBT-1622	35	0.9662	2561	Viruses	Duplodnaviria	Heunggongvirae	Uroviricota	Caudoviricetes
RGVC770	2022NBT-16243	14	1	2561	Viruses	Duplodnaviria	Heunggongvirae	Uroviricota	Caudoviricetes
RGVC771	2022NBT-16251	78	1	2561	Viruses	Duplodnaviria	Heunggongvirae	Uroviricota	Caudoviricetes
RGVC772	2022NBT-16276	18	0.9678	2561	Viruses	Duplodnaviria	Heunggongvirae	Uroviricota	Caudoviricetes
RGVC773	2022NBT-16281_1	33	1	2561	Viruses	Duplodnaviria	Heunggongvirae	Uroviricota	Caudoviricetes
RGVC774	2022NBT-163	52	0.9454	2561	Viruses	Duplodnaviria	Heunggongvirae	Uroviricota	Caudoviricetes
RGVC775	2022NBT-16307	90	1	2561	Viruses	Duplodnaviria	Heunggongvirae	Uroviricota	Caudoviricetes
RGVC776	2022NBT-16326_1	56	1	2561	Viruses	Duplodnaviria	Heunggongvirae	Uroviricota	Caudoviricetes
RGVC777	2022NBT-1633_1	30	1	2561	Viruses	Duplodnaviria	Heunggongvirae	Uroviricota	Caudoviricetes
RGVC778	2022NBT-16350	74	1	2561	Viruses	Duplodnaviria	Heunggongvirae	Uroviricota	Caudoviricetes
RGVC779	2022NBT-16374_1	15	1	2561	Viruses	Duplodnaviria	Heunggongvirae	Uroviricota	Caudoviricetes
RGVC780	2022NBT-1642	75	0.9894	2561	Viruses	Duplodnaviria	Heunggongvirae	Uroviricota	Caudoviricetes
RGVC781	2022NBT-16434	66	0.7517	5797	Viruses	Duplodnaviria	Heunggongvirae	Uroviricota	Caudoviricetes	Crassvirales
RGVC782	2022NBT-16438_1	28	1	2561	Viruses	Duplodnaviria	Heunggongvirae	Uroviricota	Caudoviricetes
RGVC783	2022NBT-1645_1	23	1	2561	Viruses	Duplodnaviria	Heunggongvirae	Uroviricota	Caudoviricetes
RGVC784	2022NBT-1646	55	0.9739	2561	Viruses	Duplodnaviria	Heunggongvirae	Uroviricota	Caudoviricetes
RGVC785	2022NBT-16471_1	54	1	2561	Viruses	Duplodnaviria	Heunggongvirae	Uroviricota	Caudoviricetes
RGVC786	2022NBT-1649	56	1	2561	Viruses	Duplodnaviria	Heunggongvirae	Uroviricota	Caudoviricetes
RGVC787	2022NBT-16492	21	0.9481	2561	Viruses	Duplodnaviria	Heunggongvirae	Uroviricota	Caudoviricetes
RGVC788	2022NBT-16499	64	1	2561	Viruses	Duplodnaviria	Heunggongvirae	Uroviricota	Caudoviricetes
RGVC789	2022NBT-165	104	0.9969	2561	Viruses	Duplodnaviria	Heunggongvirae	Uroviricota	Caudoviricetes
RGVC790	2022NBT-1650	56	0.9845	2561	Viruses	Duplodnaviria	Heunggongvirae	Uroviricota	Caudoviricetes
RGVC791	2022NBT-16502_1	11	1	2561	Viruses	Duplodnaviria	Heunggongvirae	Uroviricota	Caudoviricetes
RGVC792	2022NBT-16519	10	1	2561	Viruses	Duplodnaviria	Heunggongvirae	Uroviricota	Caudoviricetes
RGVC793	2022NBT-1652_1	56	0.9936	2561	Viruses	Duplodnaviria	Heunggongvirae	Uroviricota	Caudoviricetes
RGVC794	2022NBT-16525	25	1	2561	Viruses	Duplodnaviria	Heunggongvirae	Uroviricota	Caudoviricetes
RGVC795	2022NBT-16535	16	0.9646	2561	Viruses	Duplodnaviria	Heunggongvirae	Uroviricota	Caudoviricetes
RGVC796	2022NBT-1654_1	92	1	2561	Viruses	Duplodnaviria	Heunggongvirae	Uroviricota	Caudoviricetes
RGVC797	2022NBT-16543	13	1	2561	Viruses	Duplodnaviria	Heunggongvirae	Uroviricota	Caudoviricetes
RGVC798	2022NBT-16547	26	1	2561	Viruses	Duplodnaviria	Heunggongvirae	Uroviricota	Caudoviricetes
RGVC799	2022NBT-16557	12	1	2561	Viruses	Duplodnaviria	Heunggongvirae	Uroviricota	Caudoviricetes
RGVC800	2022NBT-1659	65	0.983	2561	Viruses	Duplodnaviria	Heunggongvirae	Uroviricota	Caudoviricetes
RGVC801	2022NBT-1660	46	1	2561	Viruses	Duplodnaviria	Heunggongvirae	Uroviricota	Caudoviricetes
RGVC802	2022NBT-16619	6	1	2561	Viruses	Duplodnaviria	Heunggongvirae	Uroviricota	Caudoviricetes
RGVC803	2022NBT-16653	10	1	2561	Viruses	Duplodnaviria	Heunggongvirae	Uroviricota	Caudoviricetes
RGVC804	2022NBT-16669	19	0.947	2561	Viruses	Duplodnaviria	Heunggongvirae	Uroviricota	Caudoviricetes
RGVC805	2022NBT-16673	16	0.913	2561	Viruses	Duplodnaviria	Heunggongvirae	Uroviricota	Caudoviricetes
RGVC806	2022NBT-16674	13	1	2561	Viruses	Duplodnaviria	Heunggongvirae	Uroviricota	Caudoviricetes
RGVC807	2022NBT-16676_2	28	1	2561	Viruses	Duplodnaviria	Heunggongvirae	Uroviricota	Caudoviricetes
RGVC808	2022NBT-167	81	0.9827	2561	Viruses	Duplodnaviria	Heunggongvirae	Uroviricota	Caudoviricetes
RGVC809	2022NBT-1670	54	1	2561	Viruses	Duplodnaviria	Heunggongvirae	Uroviricota	Caudoviricetes
RGVC810	2022NBT-16707	10	0.9273	2561	Viruses	Duplodnaviria	Heunggongvirae	Uroviricota	Caudoviricetes
RGVC811	2022NBT-16712	11	0.8551	2561	Viruses	Duplodnaviria	Heunggongvirae	Uroviricota	Caudoviricetes
RGVC812	2022NBT-16715_1	31	1	2561	Viruses	Duplodnaviria	Heunggongvirae	Uroviricota	Caudoviricetes
RGVC813	2022NBT-16721	70	1	2561	Viruses	Duplodnaviria	Heunggongvirae	Uroviricota	Caudoviricetes
RGVC814	2022NBT-16722	16	1	2561	Viruses	Duplodnaviria	Heunggongvirae	Uroviricota	Caudoviricetes
RGVC815	2022NBT-1673	47	0.9676	2561	Viruses	Duplodnaviria	Heunggongvirae	Uroviricota	Caudoviricetes
RGVC816	2022NBT-16739	14	1	2561	Viruses	Duplodnaviria	Heunggongvirae	Uroviricota	Caudoviricetes
RGVC817	2022NBT-1674	53	0.917	2561	Viruses	Duplodnaviria	Heunggongvirae	Uroviricota	Caudoviricetes
RGVC818	2022NBT-16768_1	21	1	2561	Viruses	Duplodnaviria	Heunggongvirae	Uroviricota	Caudoviricetes
RGVC819	2022NBT-1678	38	0.9527	2561	Viruses	Duplodnaviria	Heunggongvirae	Uroviricota	Caudoviricetes
RGVC820	2022NBT-16844	18	1	2561	Viruses	Duplodnaviria	Heunggongvirae	Uroviricota	Caudoviricetes
RGVC821	2022NBT-1687	49	0.9455	2561	Viruses	Duplodnaviria	Heunggongvirae	Uroviricota	Caudoviricetes
RGVC822	2022NBT-16870_1	42	1	2561	Viruses	Duplodnaviria	Heunggongvirae	Uroviricota	Caudoviricetes
RGVC823	2022NBT-1688	67	0.981	2561	Viruses	Duplodnaviria	Heunggongvirae	Uroviricota	Caudoviricetes
RGVC824	2022NBT-16883	16	1	2561	Viruses	Duplodnaviria	Heunggongvirae	Uroviricota	Caudoviricetes
RGVC825	2022NBT-16884	12	1	2561	Viruses	Duplodnaviria	Heunggongvirae	Uroviricota	Caudoviricetes
RGVC826	2022NBT-169	108	0.9748	2561	Viruses	Duplodnaviria	Heunggongvirae	Uroviricota	Caudoviricetes
RGVC827	2022NBT-16903	10	1	2561	Viruses	Duplodnaviria	Heunggongvirae	Uroviricota	Caudoviricetes
RGVC828	2022NBT-1691	45	0.9825	2561	Viruses	Duplodnaviria	Heunggongvirae	Uroviricota	Caudoviricetes
RGVC829	2022NBT-16910	26	0.9703	2561	Viruses	Duplodnaviria	Heunggongvirae	Uroviricota	Caudoviricetes
RGVC830	2022NBT-1692	57	0.9845	2561	Viruses	Duplodnaviria	Heunggongvirae	Uroviricota	Caudoviricetes
RGVC831	2022NBT-16929	14	1	2561	Viruses	Duplodnaviria	Heunggongvirae	Uroviricota	Caudoviricetes
RGVC832	2022NBT-1696	72	0.9811	2561	Viruses	Duplodnaviria	Heunggongvirae	Uroviricota	Caudoviricetes
RGVC833	2022NBT-16962	15	1	2561	Viruses	Duplodnaviria	Heunggongvirae	Uroviricota	Caudoviricetes
RGVC834	2022NBT-16973	14	1	2561	Viruses	Duplodnaviria	Heunggongvirae	Uroviricota	Caudoviricetes
RGVC835	2022NBT-16980_1	37	0.987	2561	Viruses	Duplodnaviria	Heunggongvirae	Uroviricota	Caudoviricetes
RGVC836	2022NBT-16997	1	1	2561	Viruses	Duplodnaviria	Heunggongvirae	Uroviricota	Caudoviricetes
RGVC837	2022NBT-16998	5	0.9509	2561	Viruses	Duplodnaviria	Heunggongvirae	Uroviricota	Caudoviricetes
RGVC838	2022NBT-170	96	0.9899	2561	Viruses	Duplodnaviria	Heunggongvirae	Uroviricota	Caudoviricetes
RGVC839	2022NBT-17009	8	1	2561	Viruses	Duplodnaviria	Heunggongvirae	Uroviricota	Caudoviricetes
RGVC840	2022NBT-17014	12	1	2561	Viruses	Duplodnaviria	Heunggongvirae	Uroviricota	Caudoviricetes
RGVC841	2022NBT-17021_1	48	1	2561	Viruses	Duplodnaviria	Heunggongvirae	Uroviricota	Caudoviricetes
RGVC842	2022NBT-17027	78	0.9966	2561	Viruses	Duplodnaviria	Heunggongvirae	Uroviricota	Caudoviricetes
RGVC843	2022NBT-17028_1	27	1	2561	Viruses	Duplodnaviria	Heunggongvirae	Uroviricota	Caudoviricetes
RGVC844	2022NBT-17049	57	1	2561	Viruses	Duplodnaviria	Heunggongvirae	Uroviricota	Caudoviricetes
RGVC845	2022NBT-1705_1	29	1	2561	Viruses	Duplodnaviria	Heunggongvirae	Uroviricota	Caudoviricetes
RGVC846	2022NBT-17063_1	11	1	2561	Viruses	Duplodnaviria	Heunggongvirae	Uroviricota	Caudoviricetes
RGVC847	2022NBT-1709	58	0.9817	2561	Viruses	Duplodnaviria	Heunggongvirae	Uroviricota	Caudoviricetes
RGVC848	2022NBT-17107	16	0.9736	2561	Viruses	Duplodnaviria	Heunggongvirae	Uroviricota	Caudoviricetes
RGVC849	2022NBT-17110	81	1	2561	Viruses	Duplodnaviria	Heunggongvirae	Uroviricota	Caudoviricetes
RGVC850	2022NBT-17115	17	1	2561	Viruses	Duplodnaviria	Heunggongvirae	Uroviricota	Caudoviricetes
RGVC851	2022NBT-1717_1	42	1	2561	Viruses	Duplodnaviria	Heunggongvirae	Uroviricota	Caudoviricetes
RGVC852	2022NBT-17197	69	1	2561	Viruses	Duplodnaviria	Heunggongvirae	Uroviricota	Caudoviricetes
RGVC853	2022NBT-172	74	0.9957	2561	Viruses	Duplodnaviria	Heunggongvirae	Uroviricota	Caudoviricetes
RGVC854	2022NBT-1722	58	1	2561	Viruses	Duplodnaviria	Heunggongvirae	Uroviricota	Caudoviricetes
RGVC855	2022NBT-1726	66	1	2561	Viruses	Duplodnaviria	Heunggongvirae	Uroviricota	Caudoviricetes
RGVC856	2022NBT-1727	65	0.9863	2561	Viruses	Duplodnaviria	Heunggongvirae	Uroviricota	Caudoviricetes
RGVC857	2022NBT-17278	14	1	2561	Viruses	Duplodnaviria	Heunggongvirae	Uroviricota	Caudoviricetes
RGVC858	2022NBT-17288	7	0.8688	2561	Viruses	Duplodnaviria	Heunggongvirae	Uroviricota	Caudoviricetes
RGVC859	2022NBT-173	121	0.9813	2561	Viruses	Duplodnaviria	Heunggongvirae	Uroviricota	Caudoviricetes
RGVC860	2022NBT-17300	81	1	2561	Viruses	Duplodnaviria	Heunggongvirae	Uroviricota	Caudoviricetes
RGVC861	2022NBT-17309_1	27	1	2561	Viruses	Duplodnaviria	Heunggongvirae	Uroviricota	Caudoviricetes
RGVC862	2022NBT-17337	13	1	2561	Viruses	Duplodnaviria	Heunggongvirae	Uroviricota	Caudoviricetes
RGVC863	2022NBT-1734	34	0.9877	2561	Viruses	Duplodnaviria	Heunggongvirae	Uroviricota	Caudoviricetes
RGVC864	2022NBT-17340	18	0.9836	2561	Viruses	Duplodnaviria	Heunggongvirae	Uroviricota	Caudoviricetes
RGVC865	2022NBT-17355_1	16	1	2561	Viruses	Duplodnaviria	Heunggongvirae	Uroviricota	Caudoviricetes
RGVC866	2022NBT-1736_1	27	0.9586	2561	Viruses	Duplodnaviria	Heunggongvirae	Uroviricota	Caudoviricetes
RGVC867	2022NBT-17410	23	1	2561	Viruses	Duplodnaviria	Heunggongvirae	Uroviricota	Caudoviricetes
RGVC868	2022NBT-17414	5	1	2561	Viruses	Duplodnaviria	Heunggongvirae	Uroviricota	Caudoviricetes
RGVC869	2022NBT-1742_1	33	1	2561	Viruses	Duplodnaviria	Heunggongvirae	Uroviricota	Caudoviricetes
RGVC870	2022NBT-17428	16	0.9722	2561	Viruses	Duplodnaviria	Heunggongvirae	Uroviricota	Caudoviricetes
RGVC871	2022NBT-1746	55	0.9809	2561	Viruses	Duplodnaviria	Heunggongvirae	Uroviricota	Caudoviricetes
RGVC872	2022NBT-17468	58	1	2561	Viruses	Duplodnaviria	Heunggongvirae	Uroviricota	Caudoviricetes
RGVC873	2022NBT-1748	37	1	2561	Viruses	Duplodnaviria	Heunggongvirae	Uroviricota	Caudoviricetes
RGVC874	2022NBT-17490	17	1	2561	Viruses	Duplodnaviria	Heunggongvirae	Uroviricota	Caudoviricetes
RGVC875	2022NBT-1750	55	0.9928	2561	Viruses	Duplodnaviria	Heunggongvirae	Uroviricota	Caudoviricetes
RGVC876	2022NBT-17508	12	0.8002	2561	Viruses	Duplodnaviria	Heunggongvirae	Uroviricota	Caudoviricetes
RGVC877	2022NBT-1752	64	0.9832	2561	Viruses	Duplodnaviria	Heunggongvirae	Uroviricota	Caudoviricetes
RGVC878	2022NBT-1753	56	0.9886	2561	Viruses	Duplodnaviria	Heunggongvirae	Uroviricota	Caudoviricetes
RGVC879	2022NBT-1755	81	0.9897	2561	Viruses	Duplodnaviria	Heunggongvirae	Uroviricota	Caudoviricetes
RGVC880	2022NBT-17568	26	0.9371	2561	Viruses	Duplodnaviria	Heunggongvirae	Uroviricota	Caudoviricetes
RGVC881	2022NBT-17569	21	1	2561	Viruses	Duplodnaviria	Heunggongvirae	Uroviricota	Caudoviricetes
RGVC882	2022NBT-1758_1	18	1	2561	Viruses	Duplodnaviria	Heunggongvirae	Uroviricota	Caudoviricetes
RGVC883	2022NBT-17594	10	1	2561	Viruses	Duplodnaviria	Heunggongvirae	Uroviricota	Caudoviricetes
RGVC884	2022NBT-17623	15	1	2561	Viruses	Duplodnaviria	Heunggongvirae	Uroviricota	Caudoviricetes
RGVC885	2022NBT-17625	3	1	2561	Viruses	Duplodnaviria	Heunggongvirae	Uroviricota	Caudoviricetes
RGVC886	2022NBT-1763_1	45	1	2561	Viruses	Duplodnaviria	Heunggongvirae	Uroviricota	Caudoviricetes
RGVC887	2022NBT-17632	6	0.6238	2561	Viruses	Duplodnaviria	Heunggongvirae	Uroviricota	Caudoviricetes
RGVC888	2022NBT-1765	62	0.9013	2561	Viruses	Duplodnaviria	Heunggongvirae	Uroviricota	Caudoviricetes
RGVC889	2022NBT-17657	17	0.9397	2561	Viruses	Duplodnaviria	Heunggongvirae	Uroviricota	Caudoviricetes
RGVC890	2022NBT-1766	63	0.991	2561	Viruses	Duplodnaviria	Heunggongvirae	Uroviricota	Caudoviricetes
RGVC891	2022NBT-17667_1	43	1	2561	Viruses	Duplodnaviria	Heunggongvirae	Uroviricota	Caudoviricetes
RGVC892	2022NBT-17680	11	0.952	2561	Viruses	Duplodnaviria	Heunggongvirae	Uroviricota	Caudoviricetes
RGVC893	2022NBT-177	66	0.9799	2561	Viruses	Duplodnaviria	Heunggongvirae	Uroviricota	Caudoviricetes
RGVC894	2022NBT-17724	15	0.924	2561	Viruses	Duplodnaviria	Heunggongvirae	Uroviricota	Caudoviricetes
RGVC895	2022NBT-17733	10	1	2561	Viruses	Duplodnaviria	Heunggongvirae	Uroviricota	Caudoviricetes
RGVC896	2022NBT-1774	38	0.9628	2561	Viruses	Duplodnaviria	Heunggongvirae	Uroviricota	Caudoviricetes
RGVC897	2022NBT-17742	12	1	2561	Viruses	Duplodnaviria	Heunggongvirae	Uroviricota	Caudoviricetes
RGVC898	2022NBT-17747_1	46	1	2561	Viruses	Duplodnaviria	Heunggongvirae	Uroviricota	Caudoviricetes
RGVC899	2022NBT-17763_1	11	1	2561	Viruses	Duplodnaviria	Heunggongvirae	Uroviricota	Caudoviricetes
RGVC900	2022NBT-17764	9	1	2561	Viruses	Duplodnaviria	Heunggongvirae	Uroviricota	Caudoviricetes
RGVC901	2022NBT-1777	72	0.9899	2561	Viruses	Duplodnaviria	Heunggongvirae	Uroviricota	Caudoviricetes
RGVC902	2022NBT-17772	25	1	2561	Viruses	Duplodnaviria	Heunggongvirae	Uroviricota	Caudoviricetes
RGVC903	2022NBT-17776	18	1	2561	Viruses	Duplodnaviria	Heunggongvirae	Uroviricota	Caudoviricetes
RGVC904	2022NBT-17786	12	0.9466	2561	Viruses	Duplodnaviria	Heunggongvirae	Uroviricota	Caudoviricetes
RGVC905	2022NBT-17789_1	33	1	2561	Viruses	Duplodnaviria	Heunggongvirae	Uroviricota	Caudoviricetes
RGVC906	2022NBT-17796_1	28	1	2561	Viruses	Duplodnaviria	Heunggongvirae	Uroviricota	Caudoviricetes
RGVC907	2022NBT-17800	15	0.9641	2561	Viruses	Duplodnaviria	Heunggongvirae	Uroviricota	Caudoviricetes
RGVC908	2022NBT-17809	60	1	2561	Viruses	Duplodnaviria	Heunggongvirae	Uroviricota	Caudoviricetes
RGVC909	2022NBT-1781	66	0.9899	2561	Viruses	Duplodnaviria	Heunggongvirae	Uroviricota	Caudoviricetes
RGVC910	2022NBT-17845	7	1	2561	Viruses	Duplodnaviria	Heunggongvirae	Uroviricota	Caudoviricetes
RGVC911	2022NBT-1786	22	1	2561	Viruses	Duplodnaviria	Heunggongvirae	Uroviricota	Caudoviricetes
RGVC912	2022NBT-1788	52	0.9938	2561	Viruses	Duplodnaviria	Heunggongvirae	Uroviricota	Caudoviricetes
RGVC913	2022NBT-17886	17	1	2561	Viruses	Duplodnaviria	Heunggongvirae	Uroviricota	Caudoviricetes
RGVC914	2022NBT-1789	50	0.9925	2561	Viruses	Duplodnaviria	Heunggongvirae	Uroviricota	Caudoviricetes
RGVC915	2022NBT-17895_1	58	1	2561	Viruses	Duplodnaviria	Heunggongvirae	Uroviricota	Caudoviricetes
RGVC916	2022NBT-17897	14	1	2561	Viruses	Duplodnaviria	Heunggongvirae	Uroviricota	Caudoviricetes
RGVC917	2022NBT-179	71	0.9761	2561	Viruses	Duplodnaviria	Heunggongvirae	Uroviricota	Caudoviricetes
RGVC918	2022NBT-17901	73	1	2561	Viruses	Duplodnaviria	Heunggongvirae	Uroviricota	Caudoviricetes
RGVC919	2022NBT-17959	10	1	2561	Viruses	Duplodnaviria	Heunggongvirae	Uroviricota	Caudoviricetes
RGVC920	2022NBT-17961_1	70	1	2561	Viruses	Duplodnaviria	Heunggongvirae	Uroviricota	Caudoviricetes
RGVC921	2022NBT-1797	60	0.9139	2561	Viruses	Duplodnaviria	Heunggongvirae	Uroviricota	Caudoviricetes
RGVC922	2022NBT-17971	23	1	2561	Viruses	Duplodnaviria	Heunggongvirae	Uroviricota	Caudoviricetes
RGVC923	2022NBT-17973	66	1	2561	Viruses	Duplodnaviria	Heunggongvirae	Uroviricota	Caudoviricetes
RGVC924	2022NBT-18001	9	1	2561	Viruses	Duplodnaviria	Heunggongvirae	Uroviricota	Caudoviricetes
RGVC925	2022NBT-1801	47	0.9887	2561	Viruses	Duplodnaviria	Heunggongvirae	Uroviricota	Caudoviricetes
RGVC926	2022NBT-18012	78	0.7642	5797	Viruses	Duplodnaviria	Heunggongvirae	Uroviricota	Caudoviricetes	Crassvirales
RGVC927	2022NBT-1802_1	15	0.9609	2561	Viruses	Duplodnaviria	Heunggongvirae	Uroviricota	Caudoviricetes
RGVC928	2022NBT-18024_1	32	1	2561	Viruses	Duplodnaviria	Heunggongvirae	Uroviricota	Caudoviricetes
RGVC929	2022NBT-18037	22	1	2561	Viruses	Duplodnaviria	Heunggongvirae	Uroviricota	Caudoviricetes
RGVC930	2022NBT-18065	13	1	2561	Viruses	Duplodnaviria	Heunggongvirae	Uroviricota	Caudoviricetes
RGVC931	2022NBT-18075	18	1	2561	Viruses	Duplodnaviria	Heunggongvirae	Uroviricota	Caudoviricetes
RGVC932	2022NBT-18082	21	1	2561	Viruses	Duplodnaviria	Heunggongvirae	Uroviricota	Caudoviricetes
RGVC933	2022NBT-18093_1	35	1	2561	Viruses	Duplodnaviria	Heunggongvirae	Uroviricota	Caudoviricetes
RGVC934	2022NBT-1810_1	30	1	2561	Viruses	Duplodnaviria	Heunggongvirae	Uroviricota	Caudoviricetes
RGVC935	2022NBT-18118	14	0.9613	2561	Viruses	Duplodnaviria	Heunggongvirae	Uroviricota	Caudoviricetes
RGVC936	2022NBT-1813	35	0.981	2561	Viruses	Duplodnaviria	Heunggongvirae	Uroviricota	Caudoviricetes
RGVC937	2022NBT-1814	78	0.9906	2561	Viruses	Duplodnaviria	Heunggongvirae	Uroviricota	Caudoviricetes
RGVC938	2022NBT-18153	30	1	2561	Viruses	Duplodnaviria	Heunggongvirae	Uroviricota	Caudoviricetes
RGVC939	2022NBT-1820	48	0.9039	2561	Viruses	Duplodnaviria	Heunggongvirae	Uroviricota	Caudoviricetes
RGVC940	2022NBT-18207	30	1	2561	Viruses	Duplodnaviria	Heunggongvirae	Uroviricota	Caudoviricetes
RGVC941	2022NBT-18211	13	1	2561	Viruses	Duplodnaviria	Heunggongvirae	Uroviricota	Caudoviricetes
RGVC942	2022NBT-1822_1	30	1	2561	Viruses	Duplodnaviria	Heunggongvirae	Uroviricota	Caudoviricetes
RGVC943	2022NBT-18225	18	1	2561	Viruses	Duplodnaviria	Heunggongvirae	Uroviricota	Caudoviricetes
RGVC944	2022NBT-1823	79	0.9606	2561	Viruses	Duplodnaviria	Heunggongvirae	Uroviricota	Caudoviricetes
RGVC945	2022NBT-1824	57	1	2561	Viruses	Duplodnaviria	Heunggongvirae	Uroviricota	Caudoviricetes
RGVC946	2022NBT-1827	56	0.9917	2561	Viruses	Duplodnaviria	Heunggongvirae	Uroviricota	Caudoviricetes
RGVC947	2022NBT-18293	70	1	2561	Viruses	Duplodnaviria	Heunggongvirae	Uroviricota	Caudoviricetes
RGVC948	2022NBT-18296_1	30	1	2561	Viruses	Duplodnaviria	Heunggongvirae	Uroviricota	Caudoviricetes
RGVC949	2022NBT-18314	10	1	2561	Viruses	Duplodnaviria	Heunggongvirae	Uroviricota	Caudoviricetes
RGVC950	2022NBT-1832	50	0.981	2561	Viruses	Duplodnaviria	Heunggongvirae	Uroviricota	Caudoviricetes
RGVC951	2022NBT-18334	10	1	2561	Viruses	Duplodnaviria	Heunggongvirae	Uroviricota	Caudoviricetes
RGVC952	2022NBT-1836	46	0.9834	2561	Viruses	Duplodnaviria	Heunggongvirae	Uroviricota	Caudoviricetes
RGVC953	2022NBT-18366	77	1	2561	Viruses	Duplodnaviria	Heunggongvirae	Uroviricota	Caudoviricetes
RGVC954	2022NBT-1837_1	24	1	2561	Viruses	Duplodnaviria	Heunggongvirae	Uroviricota	Caudoviricetes
RGVC955	2022NBT-18370_1	14	1	2561	Viruses	Duplodnaviria	Heunggongvirae	Uroviricota	Caudoviricetes
RGVC956	2022NBT-1839	54	0.9825	2561	Viruses	Duplodnaviria	Heunggongvirae	Uroviricota	Caudoviricetes
RGVC957	2022NBT-18392	9	1	2561	Viruses	Duplodnaviria	Heunggongvirae	Uroviricota	Caudoviricetes
RGVC958	2022NBT-18396	84	0.7928	5797	Viruses	Duplodnaviria	Heunggongvirae	Uroviricota	Caudoviricetes	Crassvirales
RGVC959	2022NBT-1840_1	20	1	2561	Viruses	Duplodnaviria	Heunggongvirae	Uroviricota	Caudoviricetes
RGVC960	2022NBT-18403	21	1	2561	Viruses	Duplodnaviria	Heunggongvirae	Uroviricota	Caudoviricetes
RGVC961	2022NBT-18410_1	21	1	2561	Viruses	Duplodnaviria	Heunggongvirae	Uroviricota	Caudoviricetes
RGVC962	2022NBT-1844_1	16	1	2561	Viruses	Duplodnaviria	Heunggongvirae	Uroviricota	Caudoviricetes
RGVC963	2022NBT-18443	13	1	2561	Viruses	Duplodnaviria	Heunggongvirae	Uroviricota	Caudoviricetes
RGVC964	2022NBT-18452	16	0.9782	2561	Viruses	Duplodnaviria	Heunggongvirae	Uroviricota	Caudoviricetes
RGVC965	2022NBT-1847	57	0.9599	2561	Viruses	Duplodnaviria	Heunggongvirae	Uroviricota	Caudoviricetes
RGVC966	2022NBT-18476	3	1	2561	Viruses	Duplodnaviria	Heunggongvirae	Uroviricota	Caudoviricetes
RGVC967	2022NBT-1849	72	0.984	2561	Viruses	Duplodnaviria	Heunggongvirae	Uroviricota	Caudoviricetes
RGVC968	2022NBT-18491	6	1	2561	Viruses	Duplodnaviria	Heunggongvirae	Uroviricota	Caudoviricetes
RGVC969	2022NBT-18497	15	0.9508	2561	Viruses	Duplodnaviria	Heunggongvirae	Uroviricota	Caudoviricetes
RGVC970	2022NBT-1850	57	1	2561	Viruses	Duplodnaviria	Heunggongvirae	Uroviricota	Caudoviricetes
RGVC971	2022NBT-18510	10	1	2561	Viruses	Duplodnaviria	Heunggongvirae	Uroviricota	Caudoviricetes
RGVC972	2022NBT-18519_1	8	1	2561	Viruses	Duplodnaviria	Heunggongvirae	Uroviricota	Caudoviricetes
RGVC973	2022NBT-1852	47	0.9898	2561	Viruses	Duplodnaviria	Heunggongvirae	Uroviricota	Caudoviricetes
RGVC974	2022NBT-1854	39	0.9763	2561	Viruses	Duplodnaviria	Heunggongvirae	Uroviricota	Caudoviricetes
RGVC975	2022NBT-18540	10	1	2561	Viruses	Duplodnaviria	Heunggongvirae	Uroviricota	Caudoviricetes
RGVC976	2022NBT-18551	15	0.9348	2561	Viruses	Duplodnaviria	Heunggongvirae	Uroviricota	Caudoviricetes
RGVC977	2022NBT-18559	69	1	2561	Viruses	Duplodnaviria	Heunggongvirae	Uroviricota	Caudoviricetes
RGVC978	2022NBT-1856	43	0.9612	2561	Viruses	Duplodnaviria	Heunggongvirae	Uroviricota	Caudoviricetes
RGVC979	2022NBT-1857	68	0.9868	2561	Viruses	Duplodnaviria	Heunggongvirae	Uroviricota	Caudoviricetes
RGVC980	2022NBT-1858	58	0.9941	2561	Viruses	Duplodnaviria	Heunggongvirae	Uroviricota	Caudoviricetes
RGVC981	2022NBT-186	76	0.9864	2561	Viruses	Duplodnaviria	Heunggongvirae	Uroviricota	Caudoviricetes
RGVC982	2022NBT-1860	56	0.9851	2561	Viruses	Duplodnaviria	Heunggongvirae	Uroviricota	Caudoviricetes
RGVC983	2022NBT-18608	79	1	2561	Viruses	Duplodnaviria	Heunggongvirae	Uroviricota	Caudoviricetes
RGVC984	2022NBT-1862_1	20	1	2561	Viruses	Duplodnaviria	Heunggongvirae	Uroviricota	Caudoviricetes
RGVC985	2022NBT-18638	6	1	2561	Viruses	Duplodnaviria	Heunggongvirae	Uroviricota	Caudoviricetes
RGVC986	2022NBT-1864	80	0.9775	2561	Viruses	Duplodnaviria	Heunggongvirae	Uroviricota	Caudoviricetes
RGVC987	2022NBT-18649	81	1	2561	Viruses	Duplodnaviria	Heunggongvirae	Uroviricota	Caudoviricetes
RGVC988	2022NBT-18657_1	16	1	2561	Viruses	Duplodnaviria	Heunggongvirae	Uroviricota	Caudoviricetes
RGVC989	2022NBT-1866	70	0.978	2561	Viruses	Duplodnaviria	Heunggongvirae	Uroviricota	Caudoviricetes
RGVC990	2022NBT-18690_1	28	1	2561	Viruses	Duplodnaviria	Heunggongvirae	Uroviricota	Caudoviricetes
RGVC991	2022NBT-187	109	0.9921	2561	Viruses	Duplodnaviria	Heunggongvirae	Uroviricota	Caudoviricetes
RGVC992	2022NBT-1871	71	0.9898	2561	Viruses	Duplodnaviria	Heunggongvirae	Uroviricota	Caudoviricetes
RGVC993	2022NBT-1872_1	13	1	2561	Viruses	Duplodnaviria	Heunggongvirae	Uroviricota	Caudoviricetes
RGVC994	2022NBT-18720	17	0.9463	2561	Viruses	Duplodnaviria	Heunggongvirae	Uroviricota	Caudoviricetes
RGVC995	2022NBT-1874	74	0.9883	2561	Viruses	Duplodnaviria	Heunggongvirae	Uroviricota	Caudoviricetes
RGVC996	2022NBT-18741_1	34	1	2561	Viruses	Duplodnaviria	Heunggongvirae	Uroviricota	Caudoviricetes
RGVC997	2022NBT-18751	60	1	2561	Viruses	Duplodnaviria	Heunggongvirae	Uroviricota	Caudoviricetes
RGVC998	2022NBT-18754_1	24	1	2561	Viruses	Duplodnaviria	Heunggongvirae	Uroviricota	Caudoviricetes
RGVC999	2022NBT-1876	46	0.9742	2561	Viruses	Duplodnaviria	Heunggongvirae	Uroviricota	Caudoviricetes
RGVC1000	2022NBT-18762	19	1	2561	Viruses	Duplodnaviria	Heunggongvirae	Uroviricota	Caudoviricetes
RGVC1001	2022NBT-1877	44	0.9816	2561	Viruses	Duplodnaviria	Heunggongvirae	Uroviricota	Caudoviricetes
RGVC1002	2022NBT-18784_1	26	1	2561	Viruses	Duplodnaviria	Heunggongvirae	Uroviricota	Caudoviricetes
RGVC1003	2022NBT-18791	18	1	2561	Viruses	Duplodnaviria	Heunggongvirae	Uroviricota	Caudoviricetes
RGVC1004	2022NBT-188	104	0.9955	2561	Viruses	Duplodnaviria	Heunggongvirae	Uroviricota	Caudoviricetes
RGVC1005	2022NBT-1880	63	0.9791	2561	Viruses	Duplodnaviria	Heunggongvirae	Uroviricota	Caudoviricetes
RGVC1006	2022NBT-18801	58	1	2561	Viruses	Duplodnaviria	Heunggongvirae	Uroviricota	Caudoviricetes
RGVC1007	2022NBT-1884_1	37	1	2561	Viruses	Duplodnaviria	Heunggongvirae	Uroviricota	Caudoviricetes
RGVC1008	2022NBT-18845_1	16	1	2561	Viruses	Duplodnaviria	Heunggongvirae	Uroviricota	Caudoviricetes
RGVC1009	2022NBT-18849_1	62	1	2561	Viruses	Duplodnaviria	Heunggongvirae	Uroviricota	Caudoviricetes
RGVC1010	2022NBT-1885	64	0.9789	2561	Viruses	Duplodnaviria	Heunggongvirae	Uroviricota	Caudoviricetes
RGVC1011	2022NBT-18866	10	0.9383	2561	Viruses	Duplodnaviria	Heunggongvirae	Uroviricota	Caudoviricetes
RGVC1012	2022NBT-18885	6	1	2561	Viruses	Duplodnaviria	Heunggongvirae	Uroviricota	Caudoviricetes
RGVC1013	2022NBT-18889	12	1	2561	Viruses	Duplodnaviria	Heunggongvirae	Uroviricota	Caudoviricetes
RGVC1014	2022NBT-18926	55	1	2561	Viruses	Duplodnaviria	Heunggongvirae	Uroviricota	Caudoviricetes
RGVC1015	2022NBT-1895_1	43	1	2561	Viruses	Duplodnaviria	Heunggongvirae	Uroviricota	Caudoviricetes
RGVC1016	2022NBT-18952	71	1	2561	Viruses	Duplodnaviria	Heunggongvirae	Uroviricota	Caudoviricetes
RGVC1017	2022NBT-19012	13	1	2561	Viruses	Duplodnaviria	Heunggongvirae	Uroviricota	Caudoviricetes
RGVC1018	2022NBT-19013	33	1	2561	Viruses	Duplodnaviria	Heunggongvirae	Uroviricota	Caudoviricetes
RGVC1019	2022NBT-1903	62	0.9948	2561	Viruses	Duplodnaviria	Heunggongvirae	Uroviricota	Caudoviricetes
RGVC1020	2022NBT-19037	76	0.7554	5797	Viruses	Duplodnaviria	Heunggongvirae	Uroviricota	Caudoviricetes	Crassvirales
RGVC1021	2022NBT-1904_1	42	1	2561	Viruses	Duplodnaviria	Heunggongvirae	Uroviricota	Caudoviricetes
RGVC1022	2022NBT-19041_1	35	1	2561	Viruses	Duplodnaviria	Heunggongvirae	Uroviricota	Caudoviricetes
RGVC1023	2022NBT-19045	7	0.9291	2561	Viruses	Duplodnaviria	Heunggongvirae	Uroviricota	Caudoviricetes
RGVC1024	2022NBT-19061	9	1	2561	Viruses	Duplodnaviria	Heunggongvirae	Uroviricota	Caudoviricetes
RGVC1025	2022NBT-19062_1	10	1	2561	Viruses	Duplodnaviria	Heunggongvirae	Uroviricota	Caudoviricetes
RGVC1026	2022NBT-19066_1	38	1	2561	Viruses	Duplodnaviria	Heunggongvirae	Uroviricota	Caudoviricetes
RGVC1027	2022NBT-19067_1	25	1	2561	Viruses	Duplodnaviria	Heunggongvirae	Uroviricota	Caudoviricetes
RGVC1028	2022NBT-1907	70	0.9814	2561	Viruses	Duplodnaviria	Heunggongvirae	Uroviricota	Caudoviricetes
RGVC1029	2022NBT-19081	16	1	2561	Viruses	Duplodnaviria	Heunggongvirae	Uroviricota	Caudoviricetes
RGVC1030	2022NBT-19091	73	1	2561	Viruses	Duplodnaviria	Heunggongvirae	Uroviricota	Caudoviricetes
RGVC1031	2022NBT-191	89	0.9887	2561	Viruses	Duplodnaviria	Heunggongvirae	Uroviricota	Caudoviricetes
RGVC1032	2022NBT-1911	60	0.9947	2561	Viruses	Duplodnaviria	Heunggongvirae	Uroviricota	Caudoviricetes
RGVC1033	2022NBT-19120	4	1	2561	Viruses	Duplodnaviria	Heunggongvirae	Uroviricota	Caudoviricetes
RGVC1034	2022NBT-1914	60	0.9814	2561	Viruses	Duplodnaviria	Heunggongvirae	Uroviricota	Caudoviricetes
RGVC1035	2022NBT-19142	10	1	2561	Viruses	Duplodnaviria	Heunggongvirae	Uroviricota	Caudoviricetes
RGVC1036	2022NBT-19148_1	55	1	2561	Viruses	Duplodnaviria	Heunggongvirae	Uroviricota	Caudoviricetes
RGVC1037	2022NBT-19163	15	0.9453	2561	Viruses	Duplodnaviria	Heunggongvirae	Uroviricota	Caudoviricetes
RGVC1038	2022NBT-19177	14	1	2561	Viruses	Duplodnaviria	Heunggongvirae	Uroviricota	Caudoviricetes
RGVC1039	2022NBT-19191	11	1	2561	Viruses	Duplodnaviria	Heunggongvirae	Uroviricota	Caudoviricetes
RGVC1040	2022NBT-19193	9	1	2561	Viruses	Duplodnaviria	Heunggongvirae	Uroviricota	Caudoviricetes
RGVC1041	2022NBT-1921_1	17	1	2561	Viruses	Duplodnaviria	Heunggongvirae	Uroviricota	Caudoviricetes
RGVC1042	2022NBT-19216	10	1	2561	Viruses	Duplodnaviria	Heunggongvirae	Uroviricota	Caudoviricetes
RGVC1043	2022NBT-19217_1	29	1	2561	Viruses	Duplodnaviria	Heunggongvirae	Uroviricota	Caudoviricetes
RGVC1044	2022NBT-19230	9	1	2561	Viruses	Duplodnaviria	Heunggongvirae	Uroviricota	Caudoviricetes
RGVC1045	2022NBT-19250	9	1	2561	Viruses	Duplodnaviria	Heunggongvirae	Uroviricota	Caudoviricetes
RGVC1046	2022NBT-19257	5	1	2561	Viruses	Duplodnaviria	Heunggongvirae	Uroviricota	Caudoviricetes
RGVC1047	2022NBT-1926	78	0.9933	2561	Viruses	Duplodnaviria	Heunggongvirae	Uroviricota	Caudoviricetes
RGVC1048	2022NBT-19273	72	0.8392	5797	Viruses	Duplodnaviria	Heunggongvirae	Uroviricota	Caudoviricetes	Crassvirales
RGVC1049	2022NBT-1929	32	1	2561	Viruses	Duplodnaviria	Heunggongvirae	Uroviricota	Caudoviricetes
RGVC1050	2022NBT-19323_1	19	1	2561	Viruses	Duplodnaviria	Heunggongvirae	Uroviricota	Caudoviricetes
RGVC1051	2022NBT-19349	16	1	2561	Viruses	Duplodnaviria	Heunggongvirae	Uroviricota	Caudoviricetes
RGVC1052	2022NBT-19352	20	0.957	2561	Viruses	Duplodnaviria	Heunggongvirae	Uroviricota	Caudoviricetes
RGVC1053	2022NBT-19367	12	1	2561	Viruses	Duplodnaviria	Heunggongvirae	Uroviricota	Caudoviricetes
RGVC1054	2022NBT-19370	2	1	2561	Viruses	Duplodnaviria	Heunggongvirae	Uroviricota	Caudoviricetes
RGVC1055	2022NBT-19378	15	0.9415	2561	Viruses	Duplodnaviria	Heunggongvirae	Uroviricota	Caudoviricetes
RGVC1056	2022NBT-19395	11	1	2561	Viruses	Duplodnaviria	Heunggongvirae	Uroviricota	Caudoviricetes
RGVC1057	2022NBT-19426	7	1	2561	Viruses	Duplodnaviria	Heunggongvirae	Uroviricota	Caudoviricetes
RGVC1058	2022NBT-19431_1	79	1	2561	Viruses	Duplodnaviria	Heunggongvirae	Uroviricota	Caudoviricetes
RGVC1059	2022NBT-1944	41	1	2561	Viruses	Duplodnaviria	Heunggongvirae	Uroviricota	Caudoviricetes
RGVC1060	2022NBT-19471	9	1	2561	Viruses	Duplodnaviria	Heunggongvirae	Uroviricota	Caudoviricetes
RGVC1061	2022NBT-19495	43	1	2561	Viruses	Duplodnaviria	Heunggongvirae	Uroviricota	Caudoviricetes
RGVC1062	2022NBT-195	80	0.9756	2561	Viruses	Duplodnaviria	Heunggongvirae	Uroviricota	Caudoviricetes
RGVC1063	2022NBT-1951	55	1	2561	Viruses	Duplodnaviria	Heunggongvirae	Uroviricota	Caudoviricetes
RGVC1064	2022NBT-19521	14	0.9626	2561	Viruses	Duplodnaviria	Heunggongvirae	Uroviricota	Caudoviricetes
RGVC1065	2022NBT-19575	23	1	2561	Viruses	Duplodnaviria	Heunggongvirae	Uroviricota	Caudoviricetes
RGVC1066	2022NBT-1958	69	0.9662	2561	Viruses	Duplodnaviria	Heunggongvirae	Uroviricota	Caudoviricetes
RGVC1067	2022NBT-19589_1	24	1	2561	Viruses	Duplodnaviria	Heunggongvirae	Uroviricota	Caudoviricetes
RGVC1068	2022NBT-196	101	0.9901	2561	Viruses	Duplodnaviria	Heunggongvirae	Uroviricota	Caudoviricetes
RGVC1069	2022NBT-19606	8	1	2561	Viruses	Duplodnaviria	Heunggongvirae	Uroviricota	Caudoviricetes
RGVC1070	2022NBT-19628	9	0.9688	2561	Viruses	Duplodnaviria	Heunggongvirae	Uroviricota	Caudoviricetes
RGVC1071	2022NBT-19631_1	31	1	2561	Viruses	Duplodnaviria	Heunggongvirae	Uroviricota	Caudoviricetes
RGVC1072	2022NBT-19638	26	1	2561	Viruses	Duplodnaviria	Heunggongvirae	Uroviricota	Caudoviricetes
RGVC1073	2022NBT-19649	9	1	2561	Viruses	Duplodnaviria	Heunggongvirae	Uroviricota	Caudoviricetes
RGVC1074	2022NBT-19657	15	0.9326	2561	Viruses	Duplodnaviria	Heunggongvirae	Uroviricota	Caudoviricetes
RGVC1075	2022NBT-19659	16	0.9686	2561	Viruses	Duplodnaviria	Heunggongvirae	Uroviricota	Caudoviricetes
RGVC1076	2022NBT-19676	13	1	2561	Viruses	Duplodnaviria	Heunggongvirae	Uroviricota	Caudoviricetes
RGVC1077	2022NBT-1968_1	44	1	2561	Viruses	Duplodnaviria	Heunggongvirae	Uroviricota	Caudoviricetes
RGVC1078	2022NBT-19695	6	1	2561	Viruses	Duplodnaviria	Heunggongvirae	Uroviricota	Caudoviricetes
RGVC1079	2022NBT-1971	61	1	2561	Viruses	Duplodnaviria	Heunggongvirae	Uroviricota	Caudoviricetes
RGVC1080	2022NBT-1972	58	0.9943	2561	Viruses	Duplodnaviria	Heunggongvirae	Uroviricota	Caudoviricetes
RGVC1081	2022NBT-1973	56	0.9728	2561	Viruses	Duplodnaviria	Heunggongvirae	Uroviricota	Caudoviricetes
RGVC1082	2022NBT-19738	14	0.974	2561	Viruses	Duplodnaviria	Heunggongvirae	Uroviricota	Caudoviricetes
RGVC1083	2022NBT-19754	19	1	2561	Viruses	Duplodnaviria	Heunggongvirae	Uroviricota	Caudoviricetes
RGVC1084	2022NBT-19763	12	0.9208	2561	Viruses	Duplodnaviria	Heunggongvirae	Uroviricota	Caudoviricetes
RGVC1085	2022NBT-19773	20	1	2561	Viruses	Duplodnaviria	Heunggongvirae	Uroviricota	Caudoviricetes
RGVC1086	2022NBT-19780	8	1	2561	Viruses	Duplodnaviria	Heunggongvirae	Uroviricota	Caudoviricetes
RGVC1087	2022NBT-19796	19	1	2561	Viruses	Duplodnaviria	Heunggongvirae	Uroviricota	Caudoviricetes
RGVC1088	2022NBT-19827_1	26	1	2561	Viruses	Duplodnaviria	Heunggongvirae	Uroviricota	Caudoviricetes
RGVC1089	2022NBT-19850	10	1	2561	Viruses	Duplodnaviria	Heunggongvirae	Uroviricota	Caudoviricetes
RGVC1090	2022NBT-19853	12	0.9182	2561	Viruses	Duplodnaviria	Heunggongvirae	Uroviricota	Caudoviricetes
RGVC1091	2022NBT-19890	13	0.9213	2561	Viruses	Duplodnaviria	Heunggongvirae	Uroviricota	Caudoviricetes
RGVC1092	2022NBT-199_1	41	1	2561	Viruses	Duplodnaviria	Heunggongvirae	Uroviricota	Caudoviricetes
RGVC1093	2022NBT-1991	45	0.9726	2561	Viruses	Duplodnaviria	Heunggongvirae	Uroviricota	Caudoviricetes
RGVC1094	2022NBT-19910	12	0.7902	2561	Viruses	Duplodnaviria	Heunggongvirae	Uroviricota	Caudoviricetes
RGVC1095	2022NBT-1996	52	0.958	2561	Viruses	Duplodnaviria	Heunggongvirae	Uroviricota	Caudoviricetes
RGVC1096	2022NBT-1998	60	0.9848	2561	Viruses	Duplodnaviria	Heunggongvirae	Uroviricota	Caudoviricetes
RGVC1097	2022NBT-19991	44	1	2561	Viruses	Duplodnaviria	Heunggongvirae	Uroviricota	Caudoviricetes
RGVC1098	2022NBT-2	118	0.9887	2561	Viruses	Duplodnaviria	Heunggongvirae	Uroviricota	Caudoviricetes
RGVC1099	2022NBT-20	89	0.9887	2561	Viruses	Duplodnaviria	Heunggongvirae	Uroviricota	Caudoviricetes
RGVC1100	2022NBT-2000_1	20	1	2561	Viruses	Duplodnaviria	Heunggongvirae	Uroviricota	Caudoviricetes
RGVC1101	2022NBT-2002	48	0.9871	2561	Viruses	Duplodnaviria	Heunggongvirae	Uroviricota	Caudoviricetes
RGVC1102	2022NBT-20043	14	1	2561	Viruses	Duplodnaviria	Heunggongvirae	Uroviricota	Caudoviricetes
RGVC1103	2022NBT-20053	10	1	2561	Viruses	Duplodnaviria	Heunggongvirae	Uroviricota	Caudoviricetes
RGVC1104	2022NBT-2006_1	37	1	2561	Viruses	Duplodnaviria	Heunggongvirae	Uroviricota	Caudoviricetes
RGVC1105	2022NBT-20070	9	0.8292	2561	Viruses	Duplodnaviria	Heunggongvirae	Uroviricota	Caudoviricetes
RGVC1106	2022NBT-20095	77	1	2561	Viruses	Duplodnaviria	Heunggongvirae	Uroviricota	Caudoviricetes
RGVC1107	2022NBT-2010_2	21	1	2561	Viruses	Duplodnaviria	Heunggongvirae	Uroviricota	Caudoviricetes
RGVC1108	2022NBT-20104	21	1	2561	Viruses	Duplodnaviria	Heunggongvirae	Uroviricota	Caudoviricetes
RGVC1109	2022NBT-20114	39	1	2561	Viruses	Duplodnaviria	Heunggongvirae	Uroviricota	Caudoviricetes
RGVC1110	2022NBT-20125	17	1	2561	Viruses	Duplodnaviria	Heunggongvirae	Uroviricota	Caudoviricetes
RGVC1111	2022NBT-2014	50	1	2561	Viruses	Duplodnaviria	Heunggongvirae	Uroviricota	Caudoviricetes
RGVC1112	2022NBT-20146	12	1	2561	Viruses	Duplodnaviria	Heunggongvirae	Uroviricota	Caudoviricetes
RGVC1113	2022NBT-20147	10	1	2561	Viruses	Duplodnaviria	Heunggongvirae	Uroviricota	Caudoviricetes
RGVC1114	2022NBT-20151	7	1	2561	Viruses	Duplodnaviria	Heunggongvirae	Uroviricota	Caudoviricetes
RGVC1115	2022NBT-2016	51	0.9501	2561	Viruses	Duplodnaviria	Heunggongvirae	Uroviricota	Caudoviricetes
RGVC1116	2022NBT-20173	7	1	2561	Viruses	Duplodnaviria	Heunggongvirae	Uroviricota	Caudoviricetes
RGVC1117	2022NBT-202	92	0.9741	2561	Viruses	Duplodnaviria	Heunggongvirae	Uroviricota	Caudoviricetes
RGVC1118	2022NBT-20215	21	1	2561	Viruses	Duplodnaviria	Heunggongvirae	Uroviricota	Caudoviricetes
RGVC1119	2022NBT-20237_1	44	1	2561	Viruses	Duplodnaviria	Heunggongvirae	Uroviricota	Caudoviricetes
RGVC1120	2022NBT-2024	49	1	2561	Viruses	Duplodnaviria	Heunggongvirae	Uroviricota	Caudoviricetes
RGVC1121	2022NBT-20246	50	1	2561	Viruses	Duplodnaviria	Heunggongvirae	Uroviricota	Caudoviricetes
RGVC1122	2022NBT-20260	12	0.9458	2561	Viruses	Duplodnaviria	Heunggongvirae	Uroviricota	Caudoviricetes
RGVC1123	2022NBT-2028	69	0.991	2561	Viruses	Duplodnaviria	Heunggongvirae	Uroviricota	Caudoviricetes
RGVC1124	2022NBT-203	101	0.9919	2561	Viruses	Duplodnaviria	Heunggongvirae	Uroviricota	Caudoviricetes
RGVC1125	2022NBT-20300_1	49	1	2561	Viruses	Duplodnaviria	Heunggongvirae	Uroviricota	Caudoviricetes
RGVC1126	2022NBT-2031	37	0.9904	2561	Viruses	Duplodnaviria	Heunggongvirae	Uroviricota	Caudoviricetes
RGVC1127	2022NBT-20344	8	0.8925	2561	Viruses	Duplodnaviria	Heunggongvirae	Uroviricota	Caudoviricetes
RGVC1128	2022NBT-2036	49	0.988	2561	Viruses	Duplodnaviria	Heunggongvirae	Uroviricota	Caudoviricetes
RGVC1129	2022NBT-2037	57	0.9918	2561	Viruses	Duplodnaviria	Heunggongvirae	Uroviricota	Caudoviricetes
RGVC1130	2022NBT-20377	22	1	2561	Viruses	Duplodnaviria	Heunggongvirae	Uroviricota	Caudoviricetes
RGVC1131	2022NBT-2038	106	1	2561	Viruses	Duplodnaviria	Heunggongvirae	Uroviricota	Caudoviricetes
RGVC1132	2022NBT-20398	11	1	2561	Viruses	Duplodnaviria	Heunggongvirae	Uroviricota	Caudoviricetes
RGVC1133	2022NBT-204_2	24	1	2561	Viruses	Duplodnaviria	Heunggongvirae	Uroviricota	Caudoviricetes
RGVC1134	2022NBT-20405	8	1	2561	Viruses	Duplodnaviria	Heunggongvirae	Uroviricota	Caudoviricetes
RGVC1135	2022NBT-20407_2	24	1	2561	Viruses	Duplodnaviria	Heunggongvirae	Uroviricota	Caudoviricetes
RGVC1136	2022NBT-20453	16	1	2561	Viruses	Duplodnaviria	Heunggongvirae	Uroviricota	Caudoviricetes
RGVC1137	2022NBT-20463_1	43	1	2561	Viruses	Duplodnaviria	Heunggongvirae	Uroviricota	Caudoviricetes
RGVC1138	2022NBT-20464	20	0.963	2561	Viruses	Duplodnaviria	Heunggongvirae	Uroviricota	Caudoviricetes
RGVC1139	2022NBT-2047	35	1	2561	Viruses	Duplodnaviria	Heunggongvirae	Uroviricota	Caudoviricetes
RGVC1140	2022NBT-20473	30	1	2561	Viruses	Duplodnaviria	Heunggongvirae	Uroviricota	Caudoviricetes
RGVC1141	2022NBT-20479_1	27	1	2561	Viruses	Duplodnaviria	Heunggongvirae	Uroviricota	Caudoviricetes
RGVC1142	2022NBT-20483	27	0.8989	2561	Viruses	Duplodnaviria	Heunggongvirae	Uroviricota	Caudoviricetes
RGVC1143	2022NBT-205	43	0.969	2561	Viruses	Duplodnaviria	Heunggongvirae	Uroviricota	Caudoviricetes
RGVC1144	2022NBT-2050	44	1	2561	Viruses	Duplodnaviria	Heunggongvirae	Uroviricota	Caudoviricetes
RGVC1145	2022NBT-20521_1	28	0.9848	2561	Viruses	Duplodnaviria	Heunggongvirae	Uroviricota	Caudoviricetes
RGVC1146	2022NBT-2053	35	1	2561	Viruses	Duplodnaviria	Heunggongvirae	Uroviricota	Caudoviricetes
RGVC1147	2022NBT-2055	48	1	2561	Viruses	Duplodnaviria	Heunggongvirae	Uroviricota	Caudoviricetes
RGVC1148	2022NBT-20550	3	1	2561	Viruses	Duplodnaviria	Heunggongvirae	Uroviricota	Caudoviricetes
RGVC1149	2022NBT-2056	76	0.9962	2561	Viruses	Duplodnaviria	Heunggongvirae	Uroviricota	Caudoviricetes
RGVC1150	2022NBT-20567_1	27	1	2561	Viruses	Duplodnaviria	Heunggongvirae	Uroviricota	Caudoviricetes
RGVC1151	2022NBT-2057	52	1	2561	Viruses	Duplodnaviria	Heunggongvirae	Uroviricota	Caudoviricetes
RGVC1152	2022NBT-20570_1	22	1	2561	Viruses	Duplodnaviria	Heunggongvirae	Uroviricota	Caudoviricetes
RGVC1153	2022NBT-2058	50	0.9924	2561	Viruses	Duplodnaviria	Heunggongvirae	Uroviricota	Caudoviricetes
RGVC1154	2022NBT-20599	4	1	2561	Viruses	Duplodnaviria	Heunggongvirae	Uroviricota	Caudoviricetes
RGVC1155	2022NBT-20609	25	1	2561	Viruses	Duplodnaviria	Heunggongvirae	Uroviricota	Caudoviricetes
RGVC1156	2022NBT-2061	61	0.9864	2561	Viruses	Duplodnaviria	Heunggongvirae	Uroviricota	Caudoviricetes
RGVC1157	2022NBT-20611	14	1	2561	Viruses	Duplodnaviria	Heunggongvirae	Uroviricota	Caudoviricetes
RGVC1158	2022NBT-2062	74	0.9854	2561	Viruses	Duplodnaviria	Heunggongvirae	Uroviricota	Caudoviricetes
RGVC1159	2022NBT-20639	7	1	2561	Viruses	Duplodnaviria	Heunggongvirae	Uroviricota	Caudoviricetes
RGVC1160	2022NBT-2064	54	0.9684	2561	Viruses	Duplodnaviria	Heunggongvirae	Uroviricota	Caudoviricetes
RGVC1161	2022NBT-20666	74	1	2561	Viruses	Duplodnaviria	Heunggongvirae	Uroviricota	Caudoviricetes
RGVC1162	2022NBT-20668	10	1	2561	Viruses	Duplodnaviria	Heunggongvirae	Uroviricota	Caudoviricetes
RGVC1163	2022NBT-2067_1	132	1	2561	Viruses	Duplodnaviria	Heunggongvirae	Uroviricota	Caudoviricetes
RGVC1164	2022NBT-2068	58	0.9933	2561	Viruses	Duplodnaviria	Heunggongvirae	Uroviricota	Caudoviricetes
RGVC1165	2022NBT-20681	16	1	2561	Viruses	Duplodnaviria	Heunggongvirae	Uroviricota	Caudoviricetes
RGVC1166	2022NBT-2069	48	0.9835	2561	Viruses	Duplodnaviria	Heunggongvirae	Uroviricota	Caudoviricetes
RGVC1167	2022NBT-20693	62	1	2561	Viruses	Duplodnaviria	Heunggongvirae	Uroviricota	Caudoviricetes
RGVC1168	2022NBT-20699	71	1	2561	Viruses	Duplodnaviria	Heunggongvirae	Uroviricota	Caudoviricetes
RGVC1169	2022NBT-20720	76	1	2561	Viruses	Duplodnaviria	Heunggongvirae	Uroviricota	Caudoviricetes
RGVC1170	2022NBT-20725	80	1	2561	Viruses	Duplodnaviria	Heunggongvirae	Uroviricota	Caudoviricetes
RGVC1171	2022NBT-20729	11	1	2561	Viruses	Duplodnaviria	Heunggongvirae	Uroviricota	Caudoviricetes
RGVC1172	2022NBT-2073	78	0.9863	2561	Viruses	Duplodnaviria	Heunggongvirae	Uroviricota	Caudoviricetes
RGVC1173	2022NBT-20747	21	1	2561	Viruses	Duplodnaviria	Heunggongvirae	Uroviricota	Caudoviricetes
RGVC1174	2022NBT-2079	73	0.9793	2561	Viruses	Duplodnaviria	Heunggongvirae	Uroviricota	Caudoviricetes
RGVC1175	2022NBT-20792	18	1	2561	Viruses	Duplodnaviria	Heunggongvirae	Uroviricota	Caudoviricetes
RGVC1176	2022NBT-20794	9	1	2561	Viruses	Duplodnaviria	Heunggongvirae	Uroviricota	Caudoviricetes
RGVC1177	2022NBT-20804	24	1	2561	Viruses	Duplodnaviria	Heunggongvirae	Uroviricota	Caudoviricetes
RGVC1178	2022NBT-2087	35	1	2561	Viruses	Duplodnaviria	Heunggongvirae	Uroviricota	Caudoviricetes
RGVC1179	2022NBT-20877	24	1	2561	Viruses	Duplodnaviria	Heunggongvirae	Uroviricota	Caudoviricetes
RGVC1180	2022NBT-20892	8	1	2561	Viruses	Duplodnaviria	Heunggongvirae	Uroviricota	Caudoviricetes
RGVC1181	2022NBT-2092	50	0.9527	2561	Viruses	Duplodnaviria	Heunggongvirae	Uroviricota	Caudoviricetes
RGVC1182	2022NBT-20922	27	1	2561	Viruses	Duplodnaviria	Heunggongvirae	Uroviricota	Caudoviricetes
RGVC1183	2022NBT-20925_1	6	1	2561	Viruses	Duplodnaviria	Heunggongvirae	Uroviricota	Caudoviricetes
RGVC1184	2022NBT-20934	7	1	2561	Viruses	Duplodnaviria	Heunggongvirae	Uroviricota	Caudoviricetes
RGVC1185	2022NBT-20938	18	1	2561	Viruses	Duplodnaviria	Heunggongvirae	Uroviricota	Caudoviricetes
RGVC1186	2022NBT-20985_1	48	1	2561	Viruses	Duplodnaviria	Heunggongvirae	Uroviricota	Caudoviricetes
RGVC1187	2022NBT-20990	7	1	2561	Viruses	Duplodnaviria	Heunggongvirae	Uroviricota	Caudoviricetes
RGVC1188	2022NBT-21	115	0.9455	2561	Viruses	Duplodnaviria	Heunggongvirae	Uroviricota	Caudoviricetes
RGVC1189	2022NBT-210	85	0.9615	2561	Viruses	Duplodnaviria	Heunggongvirae	Uroviricota	Caudoviricetes
RGVC1190	2022NBT-21018	69	1	2561	Viruses	Duplodnaviria	Heunggongvirae	Uroviricota	Caudoviricetes
RGVC1191	2022NBT-21045	9	1	2561	Viruses	Duplodnaviria	Heunggongvirae	Uroviricota	Caudoviricetes
RGVC1192	2022NBT-2105_1	32	1	2561	Viruses	Duplodnaviria	Heunggongvirae	Uroviricota	Caudoviricetes
RGVC1193	2022NBT-2109	62	0.9905	2561	Viruses	Duplodnaviria	Heunggongvirae	Uroviricota	Caudoviricetes
RGVC1194	2022NBT-211	110	0.9533	2561	Viruses	Duplodnaviria	Heunggongvirae	Uroviricota	Caudoviricetes
RGVC1195	2022NBT-21125	16	1	2561	Viruses	Duplodnaviria	Heunggongvirae	Uroviricota	Caudoviricetes
RGVC1196	2022NBT-2113_1	18	1	2561	Viruses	Duplodnaviria	Heunggongvirae	Uroviricota	Caudoviricetes
RGVC1197	2022NBT-2114_1	21	1	2561	Viruses	Duplodnaviria	Heunggongvirae	Uroviricota	Caudoviricetes
RGVC1198	2022NBT-21145	35	1	2561	Viruses	Duplodnaviria	Heunggongvirae	Uroviricota	Caudoviricetes
RGVC1199	2022NBT-21174_1	38	1	2561	Viruses	Duplodnaviria	Heunggongvirae	Uroviricota	Caudoviricetes
RGVC1200	2022NBT-21179_1	49	1	2561	Viruses	Duplodnaviria	Heunggongvirae	Uroviricota	Caudoviricetes
RGVC1201	2022NBT-21186	23	0.9894	2561	Viruses	Duplodnaviria	Heunggongvirae	Uroviricota	Caudoviricetes
RGVC1202	2022NBT-21206	18	0.9311	2561	Viruses	Duplodnaviria	Heunggongvirae	Uroviricota	Caudoviricetes
RGVC1203	2022NBT-2121	74	0.9751	2561	Viruses	Duplodnaviria	Heunggongvirae	Uroviricota	Caudoviricetes
RGVC1204	2022NBT-21215	36	1	2561	Viruses	Duplodnaviria	Heunggongvirae	Uroviricota	Caudoviricetes
RGVC1205	2022NBT-2124	36	1	2561	Viruses	Duplodnaviria	Heunggongvirae	Uroviricota	Caudoviricetes
RGVC1206	2022NBT-21289	12	1	2561	Viruses	Duplodnaviria	Heunggongvirae	Uroviricota	Caudoviricetes
RGVC1207	2022NBT-21295	60	1	2561	Viruses	Duplodnaviria	Heunggongvirae	Uroviricota	Caudoviricetes
RGVC1208	2022NBT-21313_1	7	1	2561	Viruses	Duplodnaviria	Heunggongvirae	Uroviricota	Caudoviricetes
RGVC1209	2022NBT-2133	54	0.9727	2561	Viruses	Duplodnaviria	Heunggongvirae	Uroviricota	Caudoviricetes
RGVC1210	2022NBT-21354	19	1	2561	Viruses	Duplodnaviria	Heunggongvirae	Uroviricota	Caudoviricetes
RGVC1211	2022NBT-21362	14	0.9196	2561	Viruses	Duplodnaviria	Heunggongvirae	Uroviricota	Caudoviricetes
RGVC1212	2022NBT-214	112	0.9942	2561	Viruses	Duplodnaviria	Heunggongvirae	Uroviricota	Caudoviricetes
RGVC1213	2022NBT-2141	50	0.9808	2561	Viruses	Duplodnaviria	Heunggongvirae	Uroviricota	Caudoviricetes
RGVC1214	2022NBT-21419	18	1	2561	Viruses	Duplodnaviria	Heunggongvirae	Uroviricota	Caudoviricetes
RGVC1215	2022NBT-21424	74	0.8309	5797	Viruses	Duplodnaviria	Heunggongvirae	Uroviricota	Caudoviricetes	Crassvirales
RGVC1216	2022NBT-21437	10	1	2561	Viruses	Duplodnaviria	Heunggongvirae	Uroviricota	Caudoviricetes
RGVC1217	2022NBT-21464	15	1	2561	Viruses	Duplodnaviria	Heunggongvirae	Uroviricota	Caudoviricetes
RGVC1218	2022NBT-2147_1	23	1	2561	Viruses	Duplodnaviria	Heunggongvirae	Uroviricota	Caudoviricetes
RGVC1219	2022NBT-2148	44	0.991	2561	Viruses	Duplodnaviria	Heunggongvirae	Uroviricota	Caudoviricetes
RGVC1220	2022NBT-2151	36	1	2561	Viruses	Duplodnaviria	Heunggongvirae	Uroviricota	Caudoviricetes
RGVC1221	2022NBT-21516	27	1	2561	Viruses	Duplodnaviria	Heunggongvirae	Uroviricota	Caudoviricetes
RGVC1222	2022NBT-2152	90	0.9901	2561	Viruses	Duplodnaviria	Heunggongvirae	Uroviricota	Caudoviricetes
RGVC1223	2022NBT-21520	19	0.9308	2561	Viruses	Duplodnaviria	Heunggongvirae	Uroviricota	Caudoviricetes
RGVC1224	2022NBT-21527	12	0.9703	2561	Viruses	Duplodnaviria	Heunggongvirae	Uroviricota	Caudoviricetes
RGVC1225	2022NBT-21545	15	0.9453	2561	Viruses	Duplodnaviria	Heunggongvirae	Uroviricota	Caudoviricetes
RGVC1226	2022NBT-21548	32	1	2561	Viruses	Duplodnaviria	Heunggongvirae	Uroviricota	Caudoviricetes
RGVC1227	2022NBT-2155	46	1	2561	Viruses	Duplodnaviria	Heunggongvirae	Uroviricota	Caudoviricetes
RGVC1228	2022NBT-21556	19	0.9775	2561	Viruses	Duplodnaviria	Heunggongvirae	Uroviricota	Caudoviricetes
RGVC1229	2022NBT-21569	74	1	2561	Viruses	Duplodnaviria	Heunggongvirae	Uroviricota	Caudoviricetes
RGVC1230	2022NBT-21570	7	1	2561	Viruses	Duplodnaviria	Heunggongvirae	Uroviricota	Caudoviricetes
RGVC1231	2022NBT-21581	9	1	2561	Viruses	Duplodnaviria	Heunggongvirae	Uroviricota	Caudoviricetes
RGVC1232	2022NBT-21595_1	21	1	2561	Viruses	Duplodnaviria	Heunggongvirae	Uroviricota	Caudoviricetes
RGVC1233	2022NBT-21599_1	32	1	2561	Viruses	Duplodnaviria	Heunggongvirae	Uroviricota	Caudoviricetes
RGVC1234	2022NBT-216	81	0.9877	2561	Viruses	Duplodnaviria	Heunggongvirae	Uroviricota	Caudoviricetes
RGVC1235	2022NBT-21620	34	1	2561	Viruses	Duplodnaviria	Heunggongvirae	Uroviricota	Caudoviricetes
RGVC1236	2022NBT-2163_1	25	1	2561	Viruses	Duplodnaviria	Heunggongvirae	Uroviricota	Caudoviricetes
RGVC1237	2022NBT-21637	55	1	2561	Viruses	Duplodnaviria	Heunggongvirae	Uroviricota	Caudoviricetes
RGVC1238	2022NBT-21639	17	0.9452	2561	Viruses	Duplodnaviria	Heunggongvirae	Uroviricota	Caudoviricetes
RGVC1239	2022NBT-21665	7	1	2561	Viruses	Duplodnaviria	Heunggongvirae	Uroviricota	Caudoviricetes
RGVC1240	2022NBT-21680	12	1	2561	Viruses	Duplodnaviria	Heunggongvirae	Uroviricota	Caudoviricetes
RGVC1241	2022NBT-21755	11	1	2561	Viruses	Duplodnaviria	Heunggongvirae	Uroviricota	Caudoviricetes
RGVC1242	2022NBT-21762_1	12	1	2561	Viruses	Duplodnaviria	Heunggongvirae	Uroviricota	Caudoviricetes
RGVC1243	2022NBT-21780	83	0.8468	5797	Viruses	Duplodnaviria	Heunggongvirae	Uroviricota	Caudoviricetes	Crassvirales
RGVC1244	2022NBT-21793	57	1	2561	Viruses	Duplodnaviria	Heunggongvirae	Uroviricota	Caudoviricetes
RGVC1245	2022NBT-218	114	0.9772	2561	Viruses	Duplodnaviria	Heunggongvirae	Uroviricota	Caudoviricetes
RGVC1246	2022NBT-21822	53	0.841	5797	Viruses	Duplodnaviria	Heunggongvirae	Uroviricota	Caudoviricetes	Crassvirales
RGVC1247	2022NBT-21874	17	1	2561	Viruses	Duplodnaviria	Heunggongvirae	Uroviricota	Caudoviricetes
RGVC1248	2022NBT-21878	117	1	2561	Viruses	Duplodnaviria	Heunggongvirae	Uroviricota	Caudoviricetes
RGVC1249	2022NBT-21883	9	1	2561	Viruses	Duplodnaviria	Heunggongvirae	Uroviricota	Caudoviricetes
RGVC1250	2022NBT-219	97	0.9763	2561	Viruses	Duplodnaviria	Heunggongvirae	Uroviricota	Caudoviricetes
RGVC1251	2022NBT-21907	10	1	2561	Viruses	Duplodnaviria	Heunggongvirae	Uroviricota	Caudoviricetes
RGVC1252	2022NBT-21909	10	1	2561	Viruses	Duplodnaviria	Heunggongvirae	Uroviricota	Caudoviricetes
RGVC1253	2022NBT-21915	9	0.9383	2561	Viruses	Duplodnaviria	Heunggongvirae	Uroviricota	Caudoviricetes
RGVC1254	2022NBT-21922	13	1	2561	Viruses	Duplodnaviria	Heunggongvirae	Uroviricota	Caudoviricetes
RGVC1255	2022NBT-21928_1	38	1	2561	Viruses	Duplodnaviria	Heunggongvirae	Uroviricota	Caudoviricetes
RGVC1256	2022NBT-2194	50	0.9774	2561	Viruses	Duplodnaviria	Heunggongvirae	Uroviricota	Caudoviricetes
RGVC1257	2022NBT-21942	14	1	2561	Viruses	Duplodnaviria	Heunggongvirae	Uroviricota	Caudoviricetes
RGVC1258	2022NBT-2195_1	53	1	2561	Viruses	Duplodnaviria	Heunggongvirae	Uroviricota	Caudoviricetes
RGVC1259	2022NBT-21956_1	57	1	2561	Viruses	Duplodnaviria	Heunggongvirae	Uroviricota	Caudoviricetes
RGVC1260	2022NBT-21978	19	1	2561	Viruses	Duplodnaviria	Heunggongvirae	Uroviricota	Caudoviricetes
RGVC1261	2022NBT-21982_1	38	1	2561	Viruses	Duplodnaviria	Heunggongvirae	Uroviricota	Caudoviricetes
RGVC1262	2022NBT-21990	7	1	2561	Viruses	Duplodnaviria	Heunggongvirae	Uroviricota	Caudoviricetes
RGVC1263	2022NBT-21994	62	1	2561	Viruses	Duplodnaviria	Heunggongvirae	Uroviricota	Caudoviricetes
RGVC1264	2022NBT-22	85	0.9895	2561	Viruses	Duplodnaviria	Heunggongvirae	Uroviricota	Caudoviricetes
RGVC1265	2022NBT-2202	41	1	2561	Viruses	Duplodnaviria	Heunggongvirae	Uroviricota	Caudoviricetes
RGVC1266	2022NBT-22028_1	5	1	2561	Viruses	Duplodnaviria	Heunggongvirae	Uroviricota	Caudoviricetes
RGVC1267	2022NBT-22031	4	1	2561	Viruses	Duplodnaviria	Heunggongvirae	Uroviricota	Caudoviricetes
RGVC1268	2022NBT-22034	12	1	2561	Viruses	Duplodnaviria	Heunggongvirae	Uroviricota	Caudoviricetes
RGVC1269	2022NBT-22055	11	1	2561	Viruses	Duplodnaviria	Heunggongvirae	Uroviricota	Caudoviricetes
RGVC1270	2022NBT-22057_1	42	1	2561	Viruses	Duplodnaviria	Heunggongvirae	Uroviricota	Caudoviricetes
RGVC1271	2022NBT-2207	63	0.9925	2561	Viruses	Duplodnaviria	Heunggongvirae	Uroviricota	Caudoviricetes
RGVC1272	2022NBT-22092	16	1	2561	Viruses	Duplodnaviria	Heunggongvirae	Uroviricota	Caudoviricetes
RGVC1273	2022NBT-22097	69	0.7132	5797	Viruses	Duplodnaviria	Heunggongvirae	Uroviricota	Caudoviricetes	Crassvirales
RGVC1274	2022NBT-22106	12	1	2561	Viruses	Duplodnaviria	Heunggongvirae	Uroviricota	Caudoviricetes
RGVC1275	2022NBT-2211	30	1	2561	Viruses	Duplodnaviria	Heunggongvirae	Uroviricota	Caudoviricetes
RGVC1276	2022NBT-22111	17	1	2561	Viruses	Duplodnaviria	Heunggongvirae	Uroviricota	Caudoviricetes
RGVC1277	2022NBT-22118_1	32	1	2561	Viruses	Duplodnaviria	Heunggongvirae	Uroviricota	Caudoviricetes
RGVC1278	2022NBT-2214	40	0.991	2561	Viruses	Duplodnaviria	Heunggongvirae	Uroviricota	Caudoviricetes
RGVC1279	2022NBT-22141_1	15	1	2561	Viruses	Duplodnaviria	Heunggongvirae	Uroviricota	Caudoviricetes
RGVC1280	2022NBT-2218	37	0.9383	2561	Viruses	Duplodnaviria	Heunggongvirae	Uroviricota	Caudoviricetes
RGVC1281	2022NBT-222	79	0.9831	2561	Viruses	Duplodnaviria	Heunggongvirae	Uroviricota	Caudoviricetes
RGVC1282	2022NBT-2220	63	0.9849	2561	Viruses	Duplodnaviria	Heunggongvirae	Uroviricota	Caudoviricetes
RGVC1283	2022NBT-22201	7	1	2561	Viruses	Duplodnaviria	Heunggongvirae	Uroviricota	Caudoviricetes
RGVC1284	2022NBT-2224	58	0.9748	2561	Viruses	Duplodnaviria	Heunggongvirae	Uroviricota	Caudoviricetes
RGVC1285	2022NBT-22244_1	32	1	2561	Viruses	Duplodnaviria	Heunggongvirae	Uroviricota	Caudoviricetes
RGVC1286	2022NBT-22248	4	1	2561	Viruses	Duplodnaviria	Heunggongvirae	Uroviricota	Caudoviricetes
RGVC1287	2022NBT-2227	49	0.9842	2561	Viruses	Duplodnaviria	Heunggongvirae	Uroviricota	Caudoviricetes
RGVC1288	2022NBT-22280_1	14	1	2561	Viruses	Duplodnaviria	Heunggongvirae	Uroviricota	Caudoviricetes
RGVC1289	2022NBT-22297	11	1	2561	Viruses	Duplodnaviria	Heunggongvirae	Uroviricota	Caudoviricetes
RGVC1290	2022NBT-22300	66	0.8309	5797	Viruses	Duplodnaviria	Heunggongvirae	Uroviricota	Caudoviricetes	Crassvirales
RGVC1291	2022NBT-22306	60	1	2561	Viruses	Duplodnaviria	Heunggongvirae	Uroviricota	Caudoviricetes
RGVC1292	2022NBT-22311	51	1	2561	Viruses	Duplodnaviria	Heunggongvirae	Uroviricota	Caudoviricetes
RGVC1293	2022NBT-22314	11	1	2561	Viruses	Duplodnaviria	Heunggongvirae	Uroviricota	Caudoviricetes
RGVC1294	2022NBT-22319_1	34	1	2561	Viruses	Duplodnaviria	Heunggongvirae	Uroviricota	Caudoviricetes
RGVC1295	2022NBT-22323	10	1	2561	Viruses	Duplodnaviria	Heunggongvirae	Uroviricota	Caudoviricetes
RGVC1296	2022NBT-22341	17	1	2561	Viruses	Duplodnaviria	Heunggongvirae	Uroviricota	Caudoviricetes
RGVC1297	2022NBT-2235	71	0.9821	2561	Viruses	Duplodnaviria	Heunggongvirae	Uroviricota	Caudoviricetes
RGVC1298	2022NBT-22360	9	1	2561	Viruses	Duplodnaviria	Heunggongvirae	Uroviricota	Caudoviricetes
RGVC1299	2022NBT-22362	51	1	2561	Viruses	Duplodnaviria	Heunggongvirae	Uroviricota	Caudoviricetes
RGVC1300	2022NBT-2238	65	0.9942	2561	Viruses	Duplodnaviria	Heunggongvirae	Uroviricota	Caudoviricetes
RGVC1301	2022NBT-2239	53	0.9903	2561	Viruses	Duplodnaviria	Heunggongvirae	Uroviricota	Caudoviricetes
RGVC1302	2022NBT-224_1	22	1	2561	Viruses	Duplodnaviria	Heunggongvirae	Uroviricota	Caudoviricetes
RGVC1303	2022NBT-2242	46	0.9817	2561	Viruses	Duplodnaviria	Heunggongvirae	Uroviricota	Caudoviricetes
RGVC1304	2022NBT-22441	42	1	2561	Viruses	Duplodnaviria	Heunggongvirae	Uroviricota	Caudoviricetes
RGVC1305	2022NBT-22467	16	0.9357	2561	Viruses	Duplodnaviria	Heunggongvirae	Uroviricota	Caudoviricetes
RGVC1306	2022NBT-2247	70	0.9881	2561	Viruses	Duplodnaviria	Heunggongvirae	Uroviricota	Caudoviricetes
RGVC1307	2022NBT-22473	48	1	2561	Viruses	Duplodnaviria	Heunggongvirae	Uroviricota	Caudoviricetes
RGVC1308	2022NBT-2248	73	0.9883	2561	Viruses	Duplodnaviria	Heunggongvirae	Uroviricota	Caudoviricetes
RGVC1309	2022NBT-225	79	1	2561	Viruses	Duplodnaviria	Heunggongvirae	Uroviricota	Caudoviricetes
RGVC1310	2022NBT-22581	76	0.8484	5797	Viruses	Duplodnaviria	Heunggongvirae	Uroviricota	Caudoviricetes	Crassvirales
RGVC1311	2022NBT-2259	51	0.9941	2561	Viruses	Duplodnaviria	Heunggongvirae	Uroviricota	Caudoviricetes
RGVC1312	2022NBT-22593	45	0.9894	2561	Viruses	Duplodnaviria	Heunggongvirae	Uroviricota	Caudoviricetes
RGVC1313	2022NBT-226	82	1	2561	Viruses	Duplodnaviria	Heunggongvirae	Uroviricota	Caudoviricetes
RGVC1314	2022NBT-2260_1	13	0.9235	2561	Viruses	Duplodnaviria	Heunggongvirae	Uroviricota	Caudoviricetes
RGVC1315	2022NBT-22604	12	1	2561	Viruses	Duplodnaviria	Heunggongvirae	Uroviricota	Caudoviricetes
RGVC1316	2022NBT-2264	54	0.9923	2561	Viruses	Duplodnaviria	Heunggongvirae	Uroviricota	Caudoviricetes
RGVC1317	2022NBT-22640_1	31	1	2561	Viruses	Duplodnaviria	Heunggongvirae	Uroviricota	Caudoviricetes
RGVC1318	2022NBT-22662	14	1	2561	Viruses	Duplodnaviria	Heunggongvirae	Uroviricota	Caudoviricetes
RGVC1319	2022NBT-22677	10	1	2561	Viruses	Duplodnaviria	Heunggongvirae	Uroviricota	Caudoviricetes
RGVC1320	2022NBT-22693_1	40	1	2561	Viruses	Duplodnaviria	Heunggongvirae	Uroviricota	Caudoviricetes
RGVC1321	2022NBT-22709	51	1	2561	Viruses	Duplodnaviria	Heunggongvirae	Uroviricota	Caudoviricetes
RGVC1322	2022NBT-22732	58	1	2561	Viruses	Duplodnaviria	Heunggongvirae	Uroviricota	Caudoviricetes
RGVC1323	2022NBT-2274	46	0.9692	2561	Viruses	Duplodnaviria	Heunggongvirae	Uroviricota	Caudoviricetes
RGVC1324	2022NBT-22745_1	27	1	2561	Viruses	Duplodnaviria	Heunggongvirae	Uroviricota	Caudoviricetes
RGVC1325	2022NBT-22771	5	1	2561	Viruses	Duplodnaviria	Heunggongvirae	Uroviricota	Caudoviricetes
RGVC1326	2022NBT-22808	5	1	2561	Viruses	Duplodnaviria	Heunggongvirae	Uroviricota	Caudoviricetes
RGVC1327	2022NBT-22838	59	0.7853	5797	Viruses	Duplodnaviria	Heunggongvirae	Uroviricota	Caudoviricetes	Crassvirales
RGVC1328	2022NBT-22848	5	1	2561	Viruses	Duplodnaviria	Heunggongvirae	Uroviricota	Caudoviricetes
RGVC1329	2022NBT-22857	9	0.7771	2561	Viruses	Duplodnaviria	Heunggongvirae	Uroviricota	Caudoviricetes
RGVC1330	2022NBT-22859	50	1	2561	Viruses	Duplodnaviria	Heunggongvirae	Uroviricota	Caudoviricetes
RGVC1331	2022NBT-22879	57	1	2561	Viruses	Duplodnaviria	Heunggongvirae	Uroviricota	Caudoviricetes
RGVC1332	2022NBT-22910	13	0.9729	2561	Viruses	Duplodnaviria	Heunggongvirae	Uroviricota	Caudoviricetes
RGVC1333	2022NBT-22941	13	1	2561	Viruses	Duplodnaviria	Heunggongvirae	Uroviricota	Caudoviricetes
RGVC1334	2022NBT-22955	18	1	2561	Viruses	Duplodnaviria	Heunggongvirae	Uroviricota	Caudoviricetes
RGVC1335	2022NBT-2299	37	1	2561	Viruses	Duplodnaviria	Heunggongvirae	Uroviricota	Caudoviricetes
RGVC1336	2022NBT-23_1	24	1	2561	Viruses	Duplodnaviria	Heunggongvirae	Uroviricota	Caudoviricetes
RGVC1337	2022NBT-2301	59	1	2561	Viruses	Duplodnaviria	Heunggongvirae	Uroviricota	Caudoviricetes
RGVC1338	2022NBT-23015	14	1	2561	Viruses	Duplodnaviria	Heunggongvirae	Uroviricota	Caudoviricetes
RGVC1339	2022NBT-23022	47	0.8666	5797	Viruses	Duplodnaviria	Heunggongvirae	Uroviricota	Caudoviricetes	Crassvirales
RGVC1340	2022NBT-23026	2	1	2561	Viruses	Duplodnaviria	Heunggongvirae	Uroviricota	Caudoviricetes
RGVC1341	2022NBT-2304	56	0.9756	2561	Viruses	Duplodnaviria	Heunggongvirae	Uroviricota	Caudoviricetes
RGVC1342	2022NBT-23043_1	18	1	2561	Viruses	Duplodnaviria	Heunggongvirae	Uroviricota	Caudoviricetes
RGVC1343	2022NBT-2306	63	0.9844	2561	Viruses	Duplodnaviria	Heunggongvirae	Uroviricota	Caudoviricetes
RGVC1344	2022NBT-23065	37	1	2561	Viruses	Duplodnaviria	Heunggongvirae	Uroviricota	Caudoviricetes
RGVC1345	2022NBT-23089	15	1	2561	Viruses	Duplodnaviria	Heunggongvirae	Uroviricota	Caudoviricetes
RGVC1346	2022NBT-23092	66	0.901	5797	Viruses	Duplodnaviria	Heunggongvirae	Uroviricota	Caudoviricetes	Crassvirales
RGVC1347	2022NBT-231	90	0.9807	2561	Viruses	Duplodnaviria	Heunggongvirae	Uroviricota	Caudoviricetes
RGVC1348	2022NBT-23109	52	0.997	2561	Viruses	Duplodnaviria	Heunggongvirae	Uroviricota	Caudoviricetes
RGVC1349	2022NBT-23111	27	1	2561	Viruses	Duplodnaviria	Heunggongvirae	Uroviricota	Caudoviricetes
RGVC1350	2022NBT-2312	67	0.9666	2561	Viruses	Duplodnaviria	Heunggongvirae	Uroviricota	Caudoviricetes
RGVC1351	2022NBT-23130	24	1	2561	Viruses	Duplodnaviria	Heunggongvirae	Uroviricota	Caudoviricetes
RGVC1352	2022NBT-23151_1	34	1	2561	Viruses	Duplodnaviria	Heunggongvirae	Uroviricota	Caudoviricetes
RGVC1353	2022NBT-23169_1	36	1	2561	Viruses	Duplodnaviria	Heunggongvirae	Uroviricota	Caudoviricetes
RGVC1354	2022NBT-23172	6	0.9297	2561	Viruses	Duplodnaviria	Heunggongvirae	Uroviricota	Caudoviricetes
RGVC1355	2022NBT-23184	16	1	2561	Viruses	Duplodnaviria	Heunggongvirae	Uroviricota	Caudoviricetes
RGVC1356	2022NBT-23210	10	1	2561	Viruses	Duplodnaviria	Heunggongvirae	Uroviricota	Caudoviricetes
RGVC1357	2022NBT-23216	14	1	2561	Viruses	Duplodnaviria	Heunggongvirae	Uroviricota	Caudoviricetes
RGVC1358	2022NBT-23229	7	0.7956	2561	Viruses	Duplodnaviria	Heunggongvirae	Uroviricota	Caudoviricetes
RGVC1359	2022NBT-2326_2	38	1	2561	Viruses	Duplodnaviria	Heunggongvirae	Uroviricota	Caudoviricetes
RGVC1360	2022NBT-23265_1	41	1	2561	Viruses	Duplodnaviria	Heunggongvirae	Uroviricota	Caudoviricetes
RGVC1361	2022NBT-23268	33	1	2561	Viruses	Duplodnaviria	Heunggongvirae	Uroviricota	Caudoviricetes
RGVC1362	2022NBT-23277	13	1	2561	Viruses	Duplodnaviria	Heunggongvirae	Uroviricota	Caudoviricetes
RGVC1363	2022NBT-2328	50	0.9596	2561	Viruses	Duplodnaviria	Heunggongvirae	Uroviricota	Caudoviricetes
RGVC1364	2022NBT-23302_1	31	1	2561	Viruses	Duplodnaviria	Heunggongvirae	Uroviricota	Caudoviricetes
RGVC1365	2022NBT-23312	41	1	2561	Viruses	Duplodnaviria	Heunggongvirae	Uroviricota	Caudoviricetes
RGVC1366	2022NBT-23320	67	0.7537	5797	Viruses	Duplodnaviria	Heunggongvirae	Uroviricota	Caudoviricetes	Crassvirales
RGVC1367	2022NBT-23323	11	1	2561	Viruses	Duplodnaviria	Heunggongvirae	Uroviricota	Caudoviricetes
RGVC1368	2022NBT-23328_1	28	1	2561	Viruses	Duplodnaviria	Heunggongvirae	Uroviricota	Caudoviricetes
RGVC1369	2022NBT-23350_1	41	1	2561	Viruses	Duplodnaviria	Heunggongvirae	Uroviricota	Caudoviricetes
RGVC1370	2022NBT-23359	9	1	2561	Viruses	Duplodnaviria	Heunggongvirae	Uroviricota	Caudoviricetes
RGVC1371	2022NBT-2337	41	0.9927	2561	Viruses	Duplodnaviria	Heunggongvirae	Uroviricota	Caudoviricetes
RGVC1372	2022NBT-23376	15	0.9378	2561	Viruses	Duplodnaviria	Heunggongvirae	Uroviricota	Caudoviricetes
RGVC1373	2022NBT-2339	53	0.95	2561	Viruses	Duplodnaviria	Heunggongvirae	Uroviricota	Caudoviricetes
RGVC1374	2022NBT-23400	2	1	2561	Viruses	Duplodnaviria	Heunggongvirae	Uroviricota	Caudoviricetes
RGVC1375	2022NBT-23408	7	1	2561	Viruses	Duplodnaviria	Heunggongvirae	Uroviricota	Caudoviricetes
RGVC1376	2022NBT-23446	13	1	2561	Viruses	Duplodnaviria	Heunggongvirae	Uroviricota	Caudoviricetes
RGVC1377	2022NBT-23452	26	1	2561	Viruses	Duplodnaviria	Heunggongvirae	Uroviricota	Caudoviricetes
RGVC1378	2022NBT-2349	54	1	2561	Viruses	Duplodnaviria	Heunggongvirae	Uroviricota	Caudoviricetes
RGVC1379	2022NBT-23497_1	38	1	2561	Viruses	Duplodnaviria	Heunggongvirae	Uroviricota	Caudoviricetes
RGVC1380	2022NBT-2350	54	0.9818	2561	Viruses	Duplodnaviria	Heunggongvirae	Uroviricota	Caudoviricetes
RGVC1381	2022NBT-23506	15	1	2561	Viruses	Duplodnaviria	Heunggongvirae	Uroviricota	Caudoviricetes
RGVC1382	2022NBT-23521	68	1	2561	Viruses	Duplodnaviria	Heunggongvirae	Uroviricota	Caudoviricetes
RGVC1383	2022NBT-23522	87	0.9284	5797	Viruses	Duplodnaviria	Heunggongvirae	Uroviricota	Caudoviricetes	Crassvirales
RGVC1384	2022NBT-23531_1	27	1	2561	Viruses	Duplodnaviria	Heunggongvirae	Uroviricota	Caudoviricetes
RGVC1385	2022NBT-23532	11	1	2561	Viruses	Duplodnaviria	Heunggongvirae	Uroviricota	Caudoviricetes
RGVC1386	2022NBT-23567_1	29	1	2561	Viruses	Duplodnaviria	Heunggongvirae	Uroviricota	Caudoviricetes
RGVC1387	2022NBT-23595	7	1	2561	Viruses	Duplodnaviria	Heunggongvirae	Uroviricota	Caudoviricetes
RGVC1388	2022NBT-2360	62	0.9753	2561	Viruses	Duplodnaviria	Heunggongvirae	Uroviricota	Caudoviricetes
RGVC1389	2022NBT-23621_1	29	1	2561	Viruses	Duplodnaviria	Heunggongvirae	Uroviricota	Caudoviricetes
RGVC1390	2022NBT-23631	8	1	2561	Viruses	Duplodnaviria	Heunggongvirae	Uroviricota	Caudoviricetes
RGVC1391	2022NBT-23676	4	1	2561	Viruses	Duplodnaviria	Heunggongvirae	Uroviricota	Caudoviricetes
RGVC1392	2022NBT-2369	38	0.9917	2561	Viruses	Duplodnaviria	Heunggongvirae	Uroviricota	Caudoviricetes
RGVC1393	2022NBT-23693_1	16	1	2561	Viruses	Duplodnaviria	Heunggongvirae	Uroviricota	Caudoviricetes
RGVC1394	2022NBT-237_1	34	1	2561	Viruses	Duplodnaviria	Heunggongvirae	Uroviricota	Caudoviricetes
RGVC1395	2022NBT-2375	51	1	2561	Viruses	Duplodnaviria	Heunggongvirae	Uroviricota	Caudoviricetes
RGVC1396	2022NBT-23753	7	1	2561	Viruses	Duplodnaviria	Heunggongvirae	Uroviricota	Caudoviricetes
RGVC1397	2022NBT-23767	58	1	2561	Viruses	Duplodnaviria	Heunggongvirae	Uroviricota	Caudoviricetes
RGVC1398	2022NBT-23769	15	1	2561	Viruses	Duplodnaviria	Heunggongvirae	Uroviricota	Caudoviricetes
RGVC1399	2022NBT-23783	68	0.8719	5797	Viruses	Duplodnaviria	Heunggongvirae	Uroviricota	Caudoviricetes	Crassvirales
RGVC1400	2022NBT-238_1	29	1	2561	Viruses	Duplodnaviria	Heunggongvirae	Uroviricota	Caudoviricetes
RGVC1401	2022NBT-2382	39	1	2561	Viruses	Duplodnaviria	Heunggongvirae	Uroviricota	Caudoviricetes
RGVC1402	2022NBT-23849	45	1	2561	Viruses	Duplodnaviria	Heunggongvirae	Uroviricota	Caudoviricetes
RGVC1403	2022NBT-23866	19	0.9855	2561	Viruses	Duplodnaviria	Heunggongvirae	Uroviricota	Caudoviricetes
RGVC1404	2022NBT-23875	13	1	2561	Viruses	Duplodnaviria	Heunggongvirae	Uroviricota	Caudoviricetes
RGVC1405	2022NBT-2388	56	0.9639	2561	Viruses	Duplodnaviria	Heunggongvirae	Uroviricota	Caudoviricetes
RGVC1406	2022NBT-23913	9	1	2561	Viruses	Duplodnaviria	Heunggongvirae	Uroviricota	Caudoviricetes
RGVC1407	2022NBT-23919_1	33	1	2561	Viruses	Duplodnaviria	Heunggongvirae	Uroviricota	Caudoviricetes
RGVC1408	2022NBT-23920	15	1	2561	Viruses	Duplodnaviria	Heunggongvirae	Uroviricota	Caudoviricetes
RGVC1409	2022NBT-23925	14	0.9548	2561	Viruses	Duplodnaviria	Heunggongvirae	Uroviricota	Caudoviricetes
RGVC1410	2022NBT-2394	30	0.9783	2561	Viruses	Duplodnaviria	Heunggongvirae	Uroviricota	Caudoviricetes
RGVC1411	2022NBT-2395	42	1	2561	Viruses	Duplodnaviria	Heunggongvirae	Uroviricota	Caudoviricetes
RGVC1412	2022NBT-2396	55	0.9844	2561	Viruses	Duplodnaviria	Heunggongvirae	Uroviricota	Caudoviricetes
RGVC1413	2022NBT-23962_1	32	1	2561	Viruses	Duplodnaviria	Heunggongvirae	Uroviricota	Caudoviricetes
RGVC1414	2022NBT-23998	7	1	2561	Viruses	Duplodnaviria	Heunggongvirae	Uroviricota	Caudoviricetes
RGVC1415	2022NBT-24	96	0.9781	2561	Viruses	Duplodnaviria	Heunggongvirae	Uroviricota	Caudoviricetes
RGVC1416	2022NBT-24002	5	1	2561	Viruses	Duplodnaviria	Heunggongvirae	Uroviricota	Caudoviricetes
RGVC1417	2022NBT-2401	49	0.9731	2561	Viruses	Duplodnaviria	Heunggongvirae	Uroviricota	Caudoviricetes
RGVC1418	2022NBT-24010_1	26	1	2561	Viruses	Duplodnaviria	Heunggongvirae	Uroviricota	Caudoviricetes
RGVC1419	2022NBT-24049	23	1	2561	Viruses	Duplodnaviria	Heunggongvirae	Uroviricota	Caudoviricetes
RGVC1420	2022NBT-2405	57	0.9622	2561	Viruses	Duplodnaviria	Heunggongvirae	Uroviricota	Caudoviricetes
RGVC1421	2022NBT-24067	30	1	2561	Viruses	Duplodnaviria	Heunggongvirae	Uroviricota	Caudoviricetes
RGVC1422	2022NBT-24073	16	1	2561	Viruses	Duplodnaviria	Heunggongvirae	Uroviricota	Caudoviricetes
RGVC1423	2022NBT-24079	9	1	2561	Viruses	Duplodnaviria	Heunggongvirae	Uroviricota	Caudoviricetes
RGVC1424	2022NBT-24082	56	1	2561	Viruses	Duplodnaviria	Heunggongvirae	Uroviricota	Caudoviricetes
RGVC1425	2022NBT-2409_1	65	1	2561	Viruses	Duplodnaviria	Heunggongvirae	Uroviricota	Caudoviricetes
RGVC1426	2022NBT-24100	13	1	2561	Viruses	Duplodnaviria	Heunggongvirae	Uroviricota	Caudoviricetes
RGVC1427	2022NBT-2413	49	0.9432	2561	Viruses	Duplodnaviria	Heunggongvirae	Uroviricota	Caudoviricetes
RGVC1428	2022NBT-24147_1	64	1	2561	Viruses	Duplodnaviria	Heunggongvirae	Uroviricota	Caudoviricetes
RGVC1429	2022NBT-24166_1	6	1	2561	Viruses	Duplodnaviria	Heunggongvirae	Uroviricota	Caudoviricetes
RGVC1430	2022NBT-24182	9	1	2561	Viruses	Duplodnaviria	Heunggongvirae	Uroviricota	Caudoviricetes
RGVC1431	2022NBT-24187_1	23	1	2561	Viruses	Duplodnaviria	Heunggongvirae	Uroviricota	Caudoviricetes
RGVC1432	2022NBT-24198_1	17	0.9328	2561	Viruses	Duplodnaviria	Heunggongvirae	Uroviricota	Caudoviricetes
RGVC1433	2022NBT-24201_1	46	1	2561	Viruses	Duplodnaviria	Heunggongvirae	Uroviricota	Caudoviricetes
RGVC1434	2022NBT-24226	48	0.9075	5797	Viruses	Duplodnaviria	Heunggongvirae	Uroviricota	Caudoviricetes	Crassvirales
RGVC1435	2022NBT-24228	10	1	2561	Viruses	Duplodnaviria	Heunggongvirae	Uroviricota	Caudoviricetes
RGVC1436	2022NBT-24243	9	1	2561	Viruses	Duplodnaviria	Heunggongvirae	Uroviricota	Caudoviricetes
RGVC1437	2022NBT-24250	3	1	2561	Viruses	Duplodnaviria	Heunggongvirae	Uroviricota	Caudoviricetes
RGVC1438	2022NBT-24290	9	1	2561	Viruses	Duplodnaviria	Heunggongvirae	Uroviricota	Caudoviricetes
RGVC1439	2022NBT-2430	41	0.9865	2561	Viruses	Duplodnaviria	Heunggongvirae	Uroviricota	Caudoviricetes
RGVC1440	2022NBT-24322_1	37	1	2561	Viruses	Duplodnaviria	Heunggongvirae	Uroviricota	Caudoviricetes
RGVC1441	2022NBT-24347	16	1	2561	Viruses	Duplodnaviria	Heunggongvirae	Uroviricota	Caudoviricetes
RGVC1442	2022NBT-24358	5	0.8086	2561	Viruses	Duplodnaviria	Heunggongvirae	Uroviricota	Caudoviricetes
RGVC1443	2022NBT-24390	34	1	2561	Viruses	Duplodnaviria	Heunggongvirae	Uroviricota	Caudoviricetes
RGVC1444	2022NBT-24402	7	1	2561	Viruses	Duplodnaviria	Heunggongvirae	Uroviricota	Caudoviricetes
RGVC1445	2022NBT-24416	8	1	2561	Viruses	Duplodnaviria	Heunggongvirae	Uroviricota	Caudoviricetes
RGVC1446	2022NBT-24426	7	1	2561	Viruses	Duplodnaviria	Heunggongvirae	Uroviricota	Caudoviricetes
RGVC1447	2022NBT-24444_1	36	1	2561	Viruses	Duplodnaviria	Heunggongvirae	Uroviricota	Caudoviricetes
RGVC1448	2022NBT-24445_1	42	1	2561	Viruses	Duplodnaviria	Heunggongvirae	Uroviricota	Caudoviricetes
RGVC1449	2022NBT-24452_1	23	1	2561	Viruses	Duplodnaviria	Heunggongvirae	Uroviricota	Caudoviricetes
RGVC1450	2022NBT-24503	22	1	2561	Viruses	Duplodnaviria	Heunggongvirae	Uroviricota	Caudoviricetes
RGVC1451	2022NBT-2451	60	0.9926	2561	Viruses	Duplodnaviria	Heunggongvirae	Uroviricota	Caudoviricetes
RGVC1452	2022NBT-24529	12	0.8553	2561	Viruses	Duplodnaviria	Heunggongvirae	Uroviricota	Caudoviricetes
RGVC1453	2022NBT-2456	65	0.9617	2561	Viruses	Duplodnaviria	Heunggongvirae	Uroviricota	Caudoviricetes
RGVC1454	2022NBT-24562	54	1	2561	Viruses	Duplodnaviria	Heunggongvirae	Uroviricota	Caudoviricetes
RGVC1455	2022NBT-24579	11	0.9632	2561	Viruses	Duplodnaviria	Heunggongvirae	Uroviricota	Caudoviricetes
RGVC1456	2022NBT-24586_1	14	1	2561	Viruses	Duplodnaviria	Heunggongvirae	Uroviricota	Caudoviricetes
RGVC1457	2022NBT-24593_1	31	1	2561	Viruses	Duplodnaviria	Heunggongvirae	Uroviricota	Caudoviricetes
RGVC1458	2022NBT-246	109	0.9565	2561	Viruses	Duplodnaviria	Heunggongvirae	Uroviricota	Caudoviricetes
RGVC1459	2022NBT-24623	41	1	2561	Viruses	Duplodnaviria	Heunggongvirae	Uroviricota	Caudoviricetes
RGVC1460	2022NBT-24642	12	1	2561	Viruses	Duplodnaviria	Heunggongvirae	Uroviricota	Caudoviricetes
RGVC1461	2022NBT-24660_1	32	1	2561	Viruses	Duplodnaviria	Heunggongvirae	Uroviricota	Caudoviricetes
RGVC1462	2022NBT-24661	3	1	2561	Viruses	Duplodnaviria	Heunggongvirae	Uroviricota	Caudoviricetes
RGVC1463	2022NBT-2467_1	57	0.9838	2561	Viruses	Duplodnaviria	Heunggongvirae	Uroviricota	Caudoviricetes
RGVC1464	2022NBT-24682	6	1	2561	Viruses	Duplodnaviria	Heunggongvirae	Uroviricota	Caudoviricetes
RGVC1465	2022NBT-247_1	30	1	2561	Viruses	Duplodnaviria	Heunggongvirae	Uroviricota	Caudoviricetes
RGVC1466	2022NBT-24740	3	1	2561	Viruses	Duplodnaviria	Heunggongvirae	Uroviricota	Caudoviricetes
RGVC1467	2022NBT-24761	7	1	2561	Viruses	Duplodnaviria	Heunggongvirae	Uroviricota	Caudoviricetes
RGVC1468	2022NBT-24785	4	1	2561	Viruses	Duplodnaviria	Heunggongvirae	Uroviricota	Caudoviricetes
RGVC1469	2022NBT-24788	7	1	2561	Viruses	Duplodnaviria	Heunggongvirae	Uroviricota	Caudoviricetes
RGVC1470	2022NBT-248	79	0.9834	2561	Viruses	Duplodnaviria	Heunggongvirae	Uroviricota	Caudoviricetes
RGVC1471	2022NBT-24803	12	0.9629	2561	Viruses	Duplodnaviria	Heunggongvirae	Uroviricota	Caudoviricetes
RGVC1472	2022NBT-24804	12	1	2561	Viruses	Duplodnaviria	Heunggongvirae	Uroviricota	Caudoviricetes
RGVC1473	2022NBT-2481	47	0.9931	2561	Viruses	Duplodnaviria	Heunggongvirae	Uroviricota	Caudoviricetes
RGVC1474	2022NBT-24836	11	1	2561	Viruses	Duplodnaviria	Heunggongvirae	Uroviricota	Caudoviricetes
RGVC1475	2022NBT-2484	40	1	2561	Viruses	Duplodnaviria	Heunggongvirae	Uroviricota	Caudoviricetes
RGVC1476	2022NBT-24849_1	34	1	2561	Viruses	Duplodnaviria	Heunggongvirae	Uroviricota	Caudoviricetes
RGVC1477	2022NBT-24858_1	34	1	2561	Viruses	Duplodnaviria	Heunggongvirae	Uroviricota	Caudoviricetes
RGVC1478	2022NBT-24865_1	40	1	2561	Viruses	Duplodnaviria	Heunggongvirae	Uroviricota	Caudoviricetes
RGVC1479	2022NBT-249	103	0.9834	2561	Viruses	Duplodnaviria	Heunggongvirae	Uroviricota	Caudoviricetes
RGVC1480	2022NBT-2492	54	0.9385	2561	Viruses	Duplodnaviria	Heunggongvirae	Uroviricota	Caudoviricetes
RGVC1481	2022NBT-2494	29	0.9846	2561	Viruses	Duplodnaviria	Heunggongvirae	Uroviricota	Caudoviricetes
RGVC1482	2022NBT-24955	14	1	2561	Viruses	Duplodnaviria	Heunggongvirae	Uroviricota	Caudoviricetes
RGVC1483	2022NBT-24985	5	0.6422	2561	Viruses	Duplodnaviria	Heunggongvirae	Uroviricota	Caudoviricetes
RGVC1484	2022NBT-24986_1	27	1	2561	Viruses	Duplodnaviria	Heunggongvirae	Uroviricota	Caudoviricetes
RGVC1485	2022NBT-2499	51	0.9356	2561	Viruses	Duplodnaviria	Heunggongvirae	Uroviricota	Caudoviricetes
RGVC1486	2022NBT-25_1	39	1	2561	Viruses	Duplodnaviria	Heunggongvirae	Uroviricota	Caudoviricetes
RGVC1487	2022NBT-2500	54	0.9319	2561	Viruses	Duplodnaviria	Heunggongvirae	Uroviricota	Caudoviricetes
RGVC1488	2022NBT-25017_1	44	1	2561	Viruses	Duplodnaviria	Heunggongvirae	Uroviricota	Caudoviricetes
RGVC1489	2022NBT-25038	4	1	2561	Viruses	Duplodnaviria	Heunggongvirae	Uroviricota	Caudoviricetes
RGVC1490	2022NBT-2505_1	20	1	2561	Viruses	Duplodnaviria	Heunggongvirae	Uroviricota	Caudoviricetes
RGVC1491	2022NBT-25059	9	1	2561	Viruses	Duplodnaviria	Heunggongvirae	Uroviricota	Caudoviricetes
RGVC1492	2022NBT-25087_1	1	1	2561	Viruses	Duplodnaviria	Heunggongvirae	Uroviricota	Caudoviricetes
RGVC1493	2022NBT-2516	61	0.9934	2561	Viruses	Duplodnaviria	Heunggongvirae	Uroviricota	Caudoviricetes
RGVC1494	2022NBT-25172	57	0.8657	5797	Viruses	Duplodnaviria	Heunggongvirae	Uroviricota	Caudoviricetes	Crassvirales
RGVC1495	2022NBT-25185	60	0.8919	5797	Viruses	Duplodnaviria	Heunggongvirae	Uroviricota	Caudoviricetes	Crassvirales
RGVC1496	2022NBT-25228	53	0.8904	5797	Viruses	Duplodnaviria	Heunggongvirae	Uroviricota	Caudoviricetes	Crassvirales
RGVC1497	2022NBT-25232	24	1	2561	Viruses	Duplodnaviria	Heunggongvirae	Uroviricota	Caudoviricetes
RGVC1498	2022NBT-25240_1	35	1	2561	Viruses	Duplodnaviria	Heunggongvirae	Uroviricota	Caudoviricetes
RGVC1499	2022NBT-25241	4	1	2561	Viruses	Duplodnaviria	Heunggongvirae	Uroviricota	Caudoviricetes
RGVC1500	2022NBT-25248	11	1	2561	Viruses	Duplodnaviria	Heunggongvirae	Uroviricota	Caudoviricetes
RGVC1501	2022NBT-25253	9	1	2561	Viruses	Duplodnaviria	Heunggongvirae	Uroviricota	Caudoviricetes
RGVC1502	2022NBT-25257	3	1	2561	Viruses	Duplodnaviria	Heunggongvirae	Uroviricota	Caudoviricetes
RGVC1503	2022NBT-25259	6	1	2561	Viruses	Duplodnaviria	Heunggongvirae	Uroviricota	Caudoviricetes
RGVC1504	2022NBT-25266	15	1	2561	Viruses	Duplodnaviria	Heunggongvirae	Uroviricota	Caudoviricetes
RGVC1505	2022NBT-25267	51	0.9027	5797	Viruses	Duplodnaviria	Heunggongvirae	Uroviricota	Caudoviricetes	Crassvirales
RGVC1506	2022NBT-25276	29	1	2561	Viruses	Duplodnaviria	Heunggongvirae	Uroviricota	Caudoviricetes
RGVC1507	2022NBT-253	99	0.9823	2561	Viruses	Duplodnaviria	Heunggongvirae	Uroviricota	Caudoviricetes
RGVC1508	2022NBT-2531	52	0.982	2561	Viruses	Duplodnaviria	Heunggongvirae	Uroviricota	Caudoviricetes
RGVC1509	2022NBT-25336_1	30	1	2561	Viruses	Duplodnaviria	Heunggongvirae	Uroviricota	Caudoviricetes
RGVC1510	2022NBT-2535	91	0.9277	2561	Viruses	Duplodnaviria	Heunggongvirae	Uroviricota	Caudoviricetes
RGVC1511	2022NBT-25352_1	17	1	2561	Viruses	Duplodnaviria	Heunggongvirae	Uroviricota	Caudoviricetes
RGVC1512	2022NBT-25367	58	1	2561	Viruses	Duplodnaviria	Heunggongvirae	Uroviricota	Caudoviricetes
RGVC1513	2022NBT-2537	46	0.9738	2561	Viruses	Duplodnaviria	Heunggongvirae	Uroviricota	Caudoviricetes
RGVC1514	2022NBT-25383	30	1	2561	Viruses	Duplodnaviria	Heunggongvirae	Uroviricota	Caudoviricetes
RGVC1515	2022NBT-25384_2	29	1	2561	Viruses	Duplodnaviria	Heunggongvirae	Uroviricota	Caudoviricetes
RGVC1516	2022NBT-2539	53	0.9525	2561	Viruses	Duplodnaviria	Heunggongvirae	Uroviricota	Caudoviricetes
RGVC1517	2022NBT-254	53	0.9806	2561	Viruses	Duplodnaviria	Heunggongvirae	Uroviricota	Caudoviricetes
RGVC1518	2022NBT-2540	87	0.9867	2561	Viruses	Duplodnaviria	Heunggongvirae	Uroviricota	Caudoviricetes
RGVC1519	2022NBT-25414	5	1	2561	Viruses	Duplodnaviria	Heunggongvirae	Uroviricota	Caudoviricetes
RGVC1520	2022NBT-25466	6	1	2561	Viruses	Duplodnaviria	Heunggongvirae	Uroviricota	Caudoviricetes
RGVC1521	2022NBT-2547_1	43	1	2561	Viruses	Duplodnaviria	Heunggongvirae	Uroviricota	Caudoviricetes
RGVC1522	2022NBT-2548	53	0.9831	2561	Viruses	Duplodnaviria	Heunggongvirae	Uroviricota	Caudoviricetes
RGVC1523	2022NBT-255	106	0.9965	2561	Viruses	Duplodnaviria	Heunggongvirae	Uroviricota	Caudoviricetes
RGVC1524	2022NBT-25502	49	1	2561	Viruses	Duplodnaviria	Heunggongvirae	Uroviricota	Caudoviricetes
RGVC1525	2022NBT-25525_1	39	1	2561	Viruses	Duplodnaviria	Heunggongvirae	Uroviricota	Caudoviricetes
RGVC1526	2022NBT-25530	15	1	2561	Viruses	Duplodnaviria	Heunggongvirae	Uroviricota	Caudoviricetes
RGVC1527	2022NBT-25558	2	1	2561	Viruses	Duplodnaviria	Heunggongvirae	Uroviricota	Caudoviricetes
RGVC1528	2022NBT-25568	63	1	2561	Viruses	Duplodnaviria	Heunggongvirae	Uroviricota	Caudoviricetes
RGVC1529	2022NBT-2559	32	1	2561	Viruses	Duplodnaviria	Heunggongvirae	Uroviricota	Caudoviricetes
RGVC1530	2022NBT-256	100	0.9827	2561	Viruses	Duplodnaviria	Heunggongvirae	Uroviricota	Caudoviricetes
RGVC1531	2022NBT-25608	8	1	2561	Viruses	Duplodnaviria	Heunggongvirae	Uroviricota	Caudoviricetes
RGVC1532	2022NBT-25634	21	1	2561	Viruses	Duplodnaviria	Heunggongvirae	Uroviricota	Caudoviricetes
RGVC1533	2022NBT-2566	56	0.9734	2561	Viruses	Duplodnaviria	Heunggongvirae	Uroviricota	Caudoviricetes
RGVC1534	2022NBT-25669_1	44	1	2561	Viruses	Duplodnaviria	Heunggongvirae	Uroviricota	Caudoviricetes
RGVC1535	2022NBT-2567	56	0.9894	2561	Viruses	Duplodnaviria	Heunggongvirae	Uroviricota	Caudoviricetes
RGVC1536	2022NBT-25682	9	0.7848	2561	Viruses	Duplodnaviria	Heunggongvirae	Uroviricota	Caudoviricetes
RGVC1537	2022NBT-257	110	0.9782	2561	Viruses	Duplodnaviria	Heunggongvirae	Uroviricota	Caudoviricetes
RGVC1538	2022NBT-2572	46	0.8888	2561	Viruses	Duplodnaviria	Heunggongvirae	Uroviricota	Caudoviricetes
RGVC1539	2022NBT-25735	30	1	2561	Viruses	Duplodnaviria	Heunggongvirae	Uroviricota	Caudoviricetes
RGVC1540	2022NBT-25775	16	0.9372	2561	Viruses	Duplodnaviria	Heunggongvirae	Uroviricota	Caudoviricetes
RGVC1541	2022NBT-25819	28	0.9703	2561	Viruses	Duplodnaviria	Heunggongvirae	Uroviricota	Caudoviricetes
RGVC1542	2022NBT-2582	52	0.9804	2561	Viruses	Duplodnaviria	Heunggongvirae	Uroviricota	Caudoviricetes
RGVC1543	2022NBT-25820	55	0.879	5797	Viruses	Duplodnaviria	Heunggongvirae	Uroviricota	Caudoviricetes	Crassvirales
RGVC1544	2022NBT-25831	22	1	2561	Viruses	Duplodnaviria	Heunggongvirae	Uroviricota	Caudoviricetes
RGVC1545	2022NBT-25883_1	47	1	2561	Viruses	Duplodnaviria	Heunggongvirae	Uroviricota	Caudoviricetes
RGVC1546	2022NBT-25885	4	1	2561	Viruses	Duplodnaviria	Heunggongvirae	Uroviricota	Caudoviricetes
RGVC1547	2022NBT-25901	12	1	2561	Viruses	Duplodnaviria	Heunggongvirae	Uroviricota	Caudoviricetes
RGVC1548	2022NBT-25915	7	1	2561	Viruses	Duplodnaviria	Heunggongvirae	Uroviricota	Caudoviricetes
RGVC1549	2022NBT-25917	73	1	2561	Viruses	Duplodnaviria	Heunggongvirae	Uroviricota	Caudoviricetes
RGVC1550	2022NBT-25951	7	1	2561	Viruses	Duplodnaviria	Heunggongvirae	Uroviricota	Caudoviricetes
RGVC1551	2022NBT-25966_1	27	1	2561	Viruses	Duplodnaviria	Heunggongvirae	Uroviricota	Caudoviricetes
RGVC1552	2022NBT-25968	10	0.9116	2561	Viruses	Duplodnaviria	Heunggongvirae	Uroviricota	Caudoviricetes
RGVC1553	2022NBT-25976	7	1	2561	Viruses	Duplodnaviria	Heunggongvirae	Uroviricota	Caudoviricetes
RGVC1554	2022NBT-26	63	0.9841	2561	Viruses	Duplodnaviria	Heunggongvirae	Uroviricota	Caudoviricetes
RGVC1555	2022NBT-260	69	0.964	2561	Viruses	Duplodnaviria	Heunggongvirae	Uroviricota	Caudoviricetes
RGVC1556	2022NBT-2600_1	31	1	2561	Viruses	Duplodnaviria	Heunggongvirae	Uroviricota	Caudoviricetes
RGVC1557	2022NBT-2604	41	0.9615	2561	Viruses	Duplodnaviria	Heunggongvirae	Uroviricota	Caudoviricetes
RGVC1558	2022NBT-26046	60	1	2561	Viruses	Duplodnaviria	Heunggongvirae	Uroviricota	Caudoviricetes
RGVC1559	2022NBT-2606	31	0.9806	2561	Viruses	Duplodnaviria	Heunggongvirae	Uroviricota	Caudoviricetes
RGVC1560	2022NBT-2608	63	0.9898	2561	Viruses	Duplodnaviria	Heunggongvirae	Uroviricota	Caudoviricetes
RGVC1561	2022NBT-26083_1	25	1	2561	Viruses	Duplodnaviria	Heunggongvirae	Uroviricota	Caudoviricetes
RGVC1562	2022NBT-26097_1	5	0.9476	2561	Viruses	Duplodnaviria	Heunggongvirae	Uroviricota	Caudoviricetes
RGVC1563	2022NBT-26099	64	1	2561	Viruses	Duplodnaviria	Heunggongvirae	Uroviricota	Caudoviricetes
RGVC1564	2022NBT-261	83	1	2561	Viruses	Duplodnaviria	Heunggongvirae	Uroviricota	Caudoviricetes
RGVC1565	2022NBT-2610	47	0.9916	2561	Viruses	Duplodnaviria	Heunggongvirae	Uroviricota	Caudoviricetes
RGVC1566	2022NBT-2611	53	0.9379	2561	Viruses	Duplodnaviria	Heunggongvirae	Uroviricota	Caudoviricetes
RGVC1567	2022NBT-26121_1	34	1	2561	Viruses	Duplodnaviria	Heunggongvirae	Uroviricota	Caudoviricetes
RGVC1568	2022NBT-26123	7	1	2561	Viruses	Duplodnaviria	Heunggongvirae	Uroviricota	Caudoviricetes
RGVC1569	2022NBT-2614_1	53	1	2561	Viruses	Duplodnaviria	Heunggongvirae	Uroviricota	Caudoviricetes
RGVC1570	2022NBT-26146	78	1	2561	Viruses	Duplodnaviria	Heunggongvirae	Uroviricota	Caudoviricetes
RGVC1571	2022NBT-262_1	20	1	2561	Viruses	Duplodnaviria	Heunggongvirae	Uroviricota	Caudoviricetes
RGVC1572	2022NBT-2624	87	0.9865	2561	Viruses	Duplodnaviria	Heunggongvirae	Uroviricota	Caudoviricetes
RGVC1573	2022NBT-26242	58	1	2561	Viruses	Duplodnaviria	Heunggongvirae	Uroviricota	Caudoviricetes
RGVC1574	2022NBT-2627_1	11	1	2561	Viruses	Duplodnaviria	Heunggongvirae	Uroviricota	Caudoviricetes
RGVC1575	2022NBT-2629	54	0.9861	2561	Viruses	Duplodnaviria	Heunggongvirae	Uroviricota	Caudoviricetes
RGVC1576	2022NBT-263	92	0.9913	2561	Viruses	Duplodnaviria	Heunggongvirae	Uroviricota	Caudoviricetes
RGVC1577	2022NBT-26301	10	1	2561	Viruses	Duplodnaviria	Heunggongvirae	Uroviricota	Caudoviricetes
RGVC1578	2022NBT-2632	33	0.9769	2561	Viruses	Duplodnaviria	Heunggongvirae	Uroviricota	Caudoviricetes
RGVC1579	2022NBT-26327	16	0.9721	2561	Viruses	Duplodnaviria	Heunggongvirae	Uroviricota	Caudoviricetes
RGVC1580	2022NBT-2633	47	1	2561	Viruses	Duplodnaviria	Heunggongvirae	Uroviricota	Caudoviricetes
RGVC1581	2022NBT-26343	34	1	2561	Viruses	Duplodnaviria	Heunggongvirae	Uroviricota	Caudoviricetes
RGVC1582	2022NBT-26346	16	1	2561	Viruses	Duplodnaviria	Heunggongvirae	Uroviricota	Caudoviricetes
RGVC1583	2022NBT-26384	15	0.9237	2561	Viruses	Duplodnaviria	Heunggongvirae	Uroviricota	Caudoviricetes
RGVC1584	2022NBT-26397	5	0.9007	2561	Viruses	Duplodnaviria	Heunggongvirae	Uroviricota	Caudoviricetes
RGVC1585	2022NBT-264_1	22	1	2561	Viruses	Duplodnaviria	Heunggongvirae	Uroviricota	Caudoviricetes
RGVC1586	2022NBT-26402	19	1	2561	Viruses	Duplodnaviria	Heunggongvirae	Uroviricota	Caudoviricetes
RGVC1587	2022NBT-26414	20	1	2561	Viruses	Duplodnaviria	Heunggongvirae	Uroviricota	Caudoviricetes
RGVC1588	2022NBT-26423	4	1	2561	Viruses	Duplodnaviria	Heunggongvirae	Uroviricota	Caudoviricetes
RGVC1589	2022NBT-2646	74	0.9419	2561	Viruses	Duplodnaviria	Heunggongvirae	Uroviricota	Caudoviricetes
RGVC1590	2022NBT-26472	5	1	2561	Viruses	Duplodnaviria	Heunggongvirae	Uroviricota	Caudoviricetes
RGVC1591	2022NBT-26482_1	43	1	2561	Viruses	Duplodnaviria	Heunggongvirae	Uroviricota	Caudoviricetes
RGVC1592	2022NBT-265	99	0.9721	2561	Viruses	Duplodnaviria	Heunggongvirae	Uroviricota	Caudoviricetes
RGVC1593	2022NBT-26509	28	1	2561	Viruses	Duplodnaviria	Heunggongvirae	Uroviricota	Caudoviricetes
RGVC1594	2022NBT-26511	10	1	2561	Viruses	Duplodnaviria	Heunggongvirae	Uroviricota	Caudoviricetes
RGVC1595	2022NBT-26519	15	1	2561	Viruses	Duplodnaviria	Heunggongvirae	Uroviricota	Caudoviricetes
RGVC1596	2022NBT-2652	38	0.9907	2561	Viruses	Duplodnaviria	Heunggongvirae	Uroviricota	Caudoviricetes
RGVC1597	2022NBT-2653	48	1	2561	Viruses	Duplodnaviria	Heunggongvirae	Uroviricota	Caudoviricetes
RGVC1598	2022NBT-2655_1	30	1	2561	Viruses	Duplodnaviria	Heunggongvirae	Uroviricota	Caudoviricetes
RGVC1599	2022NBT-2658	47	0.9798	2561	Viruses	Duplodnaviria	Heunggongvirae	Uroviricota	Caudoviricetes
RGVC1600	2022NBT-2660	55	0.9577	2561	Viruses	Duplodnaviria	Heunggongvirae	Uroviricota	Caudoviricetes
RGVC1601	2022NBT-26607	12	0.937	2561	Viruses	Duplodnaviria	Heunggongvirae	Uroviricota	Caudoviricetes
RGVC1602	2022NBT-26613	10	1	2561	Viruses	Duplodnaviria	Heunggongvirae	Uroviricota	Caudoviricetes
RGVC1603	2022NBT-2663_1	23	1	2561	Viruses	Duplodnaviria	Heunggongvirae	Uroviricota	Caudoviricetes
RGVC1604	2022NBT-2664	41	0.9886	2561	Viruses	Duplodnaviria	Heunggongvirae	Uroviricota	Caudoviricetes
RGVC1605	2022NBT-26660	6	1	2561	Viruses	Duplodnaviria	Heunggongvirae	Uroviricota	Caudoviricetes
RGVC1606	2022NBT-2676	41	0.9523	2561	Viruses	Duplodnaviria	Heunggongvirae	Uroviricota	Caudoviricetes
RGVC1607	2022NBT-26775	22	1	2561	Viruses	Duplodnaviria	Heunggongvirae	Uroviricota	Caudoviricetes
RGVC1609	2022NBT-26782	11	0.9659	2561	Viruses	Duplodnaviria	Heunggongvirae	Uroviricota	Caudoviricetes
RGVC1610	2022NBT-26786	4	1	2561	Viruses	Duplodnaviria	Heunggongvirae	Uroviricota	Caudoviricetes
RGVC1611	2022NBT-2680	61	0.9749	2561	Viruses	Duplodnaviria	Heunggongvirae	Uroviricota	Caudoviricetes
RGVC1612	2022NBT-26807	14	0.9662	2561	Viruses	Duplodnaviria	Heunggongvirae	Uroviricota	Caudoviricetes
RGVC1613	2022NBT-26846	8	1	2561	Viruses	Duplodnaviria	Heunggongvirae	Uroviricota	Caudoviricetes
RGVC1614	2022NBT-26866	56	1	2561	Viruses	Duplodnaviria	Heunggongvirae	Uroviricota	Caudoviricetes
RGVC1615	2022NBT-26867_1	48	1	2561	Viruses	Duplodnaviria	Heunggongvirae	Uroviricota	Caudoviricetes
RGVC1616	2022NBT-26869_1	23	1	2561	Viruses	Duplodnaviria	Heunggongvirae	Uroviricota	Caudoviricetes
RGVC1617	2022NBT-26898	5	1	2561	Viruses	Duplodnaviria	Heunggongvirae	Uroviricota	Caudoviricetes
RGVC1618	2022NBT-269	117	0.982	2561	Viruses	Duplodnaviria	Heunggongvirae	Uroviricota	Caudoviricetes
RGVC1619	2022NBT-26919	10	1	2561	Viruses	Duplodnaviria	Heunggongvirae	Uroviricota	Caudoviricetes
RGVC1620	2022NBT-2694	66	0.9865	2561	Viruses	Duplodnaviria	Heunggongvirae	Uroviricota	Caudoviricetes
RGVC1621	2022NBT-2695	42	1	2561	Viruses	Duplodnaviria	Heunggongvirae	Uroviricota	Caudoviricetes
RGVC1622	2022NBT-26958	12	1	2561	Viruses	Duplodnaviria	Heunggongvirae	Uroviricota	Caudoviricetes
RGVC1623	2022NBT-26995	42	1	2561	Viruses	Duplodnaviria	Heunggongvirae	Uroviricota	Caudoviricetes
RGVC1624	2022NBT-27	63	0.9865	2561	Viruses	Duplodnaviria	Heunggongvirae	Uroviricota	Caudoviricetes
RGVC1625	2022NBT-27008	38	0.9278	5797	Viruses	Duplodnaviria	Heunggongvirae	Uroviricota	Caudoviricetes	Crassvirales
RGVC1626	2022NBT-27023	11	1	2561	Viruses	Duplodnaviria	Heunggongvirae	Uroviricota	Caudoviricetes
RGVC1627	2022NBT-27029	8	1	2561	Viruses	Duplodnaviria	Heunggongvirae	Uroviricota	Caudoviricetes
RGVC1628	2022NBT-27043_1	24	1	2561	Viruses	Duplodnaviria	Heunggongvirae	Uroviricota	Caudoviricetes
RGVC1629	2022NBT-27055	10	1	2561	Viruses	Duplodnaviria	Heunggongvirae	Uroviricota	Caudoviricetes
RGVC1630	2022NBT-27060	10	0.9752	2561	Viruses	Duplodnaviria	Heunggongvirae	Uroviricota	Caudoviricetes
RGVC1631	2022NBT-27068_1	18	1	2561	Viruses	Duplodnaviria	Heunggongvirae	Uroviricota	Caudoviricetes
RGVC1632	2022NBT-2708	58	1	2561	Viruses	Duplodnaviria	Heunggongvirae	Uroviricota	Caudoviricetes
RGVC1633	2022NBT-271	88	1	2561	Viruses	Duplodnaviria	Heunggongvirae	Uroviricota	Caudoviricetes
RGVC1634	2022NBT-2710	58	0.992	2561	Viruses	Duplodnaviria	Heunggongvirae	Uroviricota	Caudoviricetes
RGVC1635	2022NBT-27104	65	1	2561	Viruses	Duplodnaviria	Heunggongvirae	Uroviricota	Caudoviricetes
RGVC1636	2022NBT-272	77	0.9666	2561	Viruses	Duplodnaviria	Heunggongvirae	Uroviricota	Caudoviricetes
RGVC1637	2022NBT-27211	24	1	2561	Viruses	Duplodnaviria	Heunggongvirae	Uroviricota	Caudoviricetes
RGVC1638	2022NBT-27218	9	1	2561	Viruses	Duplodnaviria	Heunggongvirae	Uroviricota	Caudoviricetes
RGVC1639	2022NBT-27226	11	1	2561	Viruses	Duplodnaviria	Heunggongvirae	Uroviricota	Caudoviricetes
RGVC1640	2022NBT-27259_1	14	1	2561	Viruses	Duplodnaviria	Heunggongvirae	Uroviricota	Caudoviricetes
RGVC1641	2022NBT-27276	7	1	2561	Viruses	Duplodnaviria	Heunggongvirae	Uroviricota	Caudoviricetes
RGVC1642	2022NBT-2728	54	0.9931	2561	Viruses	Duplodnaviria	Heunggongvirae	Uroviricota	Caudoviricetes
RGVC1643	2022NBT-27291	11	1	2561	Viruses	Duplodnaviria	Heunggongvirae	Uroviricota	Caudoviricetes
RGVC1644	2022NBT-2733	62	0.9918	2561	Viruses	Duplodnaviria	Heunggongvirae	Uroviricota	Caudoviricetes
RGVC1645	2022NBT-27341	81	0.9953	2561	Viruses	Duplodnaviria	Heunggongvirae	Uroviricota	Caudoviricetes
RGVC1646	2022NBT-27434_1	22	1	2561	Viruses	Duplodnaviria	Heunggongvirae	Uroviricota	Caudoviricetes
RGVC1647	2022NBT-27435	8	1	2561	Viruses	Duplodnaviria	Heunggongvirae	Uroviricota	Caudoviricetes
RGVC1648	2022NBT-2744	62	0.9653	2561	Viruses	Duplodnaviria	Heunggongvirae	Uroviricota	Caudoviricetes
RGVC1649	2022NBT-27445	69	1	2561	Viruses	Duplodnaviria	Heunggongvirae	Uroviricota	Caudoviricetes
RGVC1650	2022NBT-27485_1	13	1	2561	Viruses	Duplodnaviria	Heunggongvirae	Uroviricota	Caudoviricetes
RGVC1651	2022NBT-2749	69	0.945	2561	Viruses	Duplodnaviria	Heunggongvirae	Uroviricota	Caudoviricetes
RGVC1652	2022NBT-27508_1	30	1	2561	Viruses	Duplodnaviria	Heunggongvirae	Uroviricota	Caudoviricetes
RGVC1653	2022NBT-27510	9	1	2561	Viruses	Duplodnaviria	Heunggongvirae	Uroviricota	Caudoviricetes
RGVC1654	2022NBT-27539	10	0.9343	2561	Viruses	Duplodnaviria	Heunggongvirae	Uroviricota	Caudoviricetes
RGVC1655	2022NBT-27550	18	1	2561	Viruses	Duplodnaviria	Heunggongvirae	Uroviricota	Caudoviricetes
RGVC1656	2022NBT-2756	58	1	2561	Viruses	Duplodnaviria	Heunggongvirae	Uroviricota	Caudoviricetes
RGVC1657	2022NBT-276	123	0.9845	2561	Viruses	Duplodnaviria	Heunggongvirae	Uroviricota	Caudoviricetes
RGVC1658	2022NBT-2760	34	1	2561	Viruses	Duplodnaviria	Heunggongvirae	Uroviricota	Caudoviricetes
RGVC1659	2022NBT-27615	4	1	2561	Viruses	Duplodnaviria	Heunggongvirae	Uroviricota	Caudoviricetes
RGVC1660	2022NBT-2762	67	0.9881	2561	Viruses	Duplodnaviria	Heunggongvirae	Uroviricota	Caudoviricetes
RGVC1661	2022NBT-2763	50	0.9808	2561	Viruses	Duplodnaviria	Heunggongvirae	Uroviricota	Caudoviricetes
RGVC1662	2022NBT-2764	30	1	2561	Viruses	Duplodnaviria	Heunggongvirae	Uroviricota	Caudoviricetes
RGVC1663	2022NBT-27648	16	1	2561	Viruses	Duplodnaviria	Heunggongvirae	Uroviricota	Caudoviricetes
RGVC1664	2022NBT-27656	3	1	2561	Viruses	Duplodnaviria	Heunggongvirae	Uroviricota	Caudoviricetes
RGVC1665	2022NBT-27677	85	1	2561	Viruses	Duplodnaviria	Heunggongvirae	Uroviricota	Caudoviricetes
RGVC1666	2022NBT-2768_1	76	1	2561	Viruses	Duplodnaviria	Heunggongvirae	Uroviricota	Caudoviricetes
RGVC1667	2022NBT-27734	5	0.7845	2561	Viruses	Duplodnaviria	Heunggongvirae	Uroviricota	Caudoviricetes
RGVC1668	2022NBT-27736_1	43	1	2561	Viruses	Duplodnaviria	Heunggongvirae	Uroviricota	Caudoviricetes
RGVC1669	2022NBT-27738_1	46	1	2561	Viruses	Duplodnaviria	Heunggongvirae	Uroviricota	Caudoviricetes
RGVC1670	2022NBT-27741	59	0.9917	2561	Viruses	Duplodnaviria	Heunggongvirae	Uroviricota	Caudoviricetes
RGVC1671	2022NBT-27748_1	24	1	2561	Viruses	Duplodnaviria	Heunggongvirae	Uroviricota	Caudoviricetes
RGVC1672	2022NBT-27803	17	0.9351	2561	Viruses	Duplodnaviria	Heunggongvirae	Uroviricota	Caudoviricetes
RGVC1673	2022NBT-2783	28	1	2561	Viruses	Duplodnaviria	Heunggongvirae	Uroviricota	Caudoviricetes
RGVC1674	2022NBT-27838	5	1	2561	Viruses	Duplodnaviria	Heunggongvirae	Uroviricota	Caudoviricetes
RGVC1675	2022NBT-2788	48	1	2561	Viruses	Duplodnaviria	Heunggongvirae	Uroviricota	Caudoviricetes
RGVC1676	2022NBT-279	69	1	2561	Viruses	Duplodnaviria	Heunggongvirae	Uroviricota	Caudoviricetes
RGVC1677	2022NBT-2792_1	37	1	2561	Viruses	Duplodnaviria	Heunggongvirae	Uroviricota	Caudoviricetes
RGVC1678	2022NBT-27926	6	1	2561	Viruses	Duplodnaviria	Heunggongvirae	Uroviricota	Caudoviricetes
RGVC1679	2022NBT-27930	56	1	2561	Viruses	Duplodnaviria	Heunggongvirae	Uroviricota	Caudoviricetes
RGVC1680	2022NBT-27932	9	1	2561	Viruses	Duplodnaviria	Heunggongvirae	Uroviricota	Caudoviricetes
RGVC1681	2022NBT-27964	11	1	2561	Viruses	Duplodnaviria	Heunggongvirae	Uroviricota	Caudoviricetes
RGVC1682	2022NBT-27982_1	49	1	2561	Viruses	Duplodnaviria	Heunggongvirae	Uroviricota	Caudoviricetes
RGVC1683	2022NBT-27992	57	1	2561	Viruses	Duplodnaviria	Heunggongvirae	Uroviricota	Caudoviricetes
RGVC1684	2022NBT-28_1	24	1	2561	Viruses	Duplodnaviria	Heunggongvirae	Uroviricota	Caudoviricetes
RGVC1685	2022NBT-280	62	1	2561	Viruses	Duplodnaviria	Heunggongvirae	Uroviricota	Caudoviricetes
RGVC1686	2022NBT-28002	27	1	2561	Viruses	Duplodnaviria	Heunggongvirae	Uroviricota	Caudoviricetes
RGVC1687	2022NBT-28006	13	1	2561	Viruses	Duplodnaviria	Heunggongvirae	Uroviricota	Caudoviricetes
RGVC1688	2022NBT-28029	15	1	2561	Viruses	Duplodnaviria	Heunggongvirae	Uroviricota	Caudoviricetes
RGVC1689	2022NBT-2803	33	0.9785	2561	Viruses	Duplodnaviria	Heunggongvirae	Uroviricota	Caudoviricetes
RGVC1690	2022NBT-2809	50	0.9356	2561	Viruses	Duplodnaviria	Heunggongvirae	Uroviricota	Caudoviricetes
RGVC1691	2022NBT-28091	9	1	2561	Viruses	Duplodnaviria	Heunggongvirae	Uroviricota	Caudoviricetes
RGVC1692	2022NBT-281	83	0.9714	2561	Viruses	Duplodnaviria	Heunggongvirae	Uroviricota	Caudoviricetes
RGVC1693	2022NBT-28100_1	62	1	2561	Viruses	Duplodnaviria	Heunggongvirae	Uroviricota	Caudoviricetes
RGVC1694	2022NBT-2813_1	8	1	2561	Viruses	Duplodnaviria	Heunggongvirae	Uroviricota	Caudoviricetes
RGVC1695	2022NBT-2815	51	0.992	2561	Viruses	Duplodnaviria	Heunggongvirae	Uroviricota	Caudoviricetes
RGVC1696	2022NBT-28154	9	1	2561	Viruses	Duplodnaviria	Heunggongvirae	Uroviricota	Caudoviricetes
RGVC1697	2022NBT-28160	15	1	2561	Viruses	Duplodnaviria	Heunggongvirae	Uroviricota	Caudoviricetes
RGVC1698	2022NBT-28165	34	1	2561	Viruses	Duplodnaviria	Heunggongvirae	Uroviricota	Caudoviricetes
RGVC1699	2022NBT-28207	13	1	2561	Viruses	Duplodnaviria	Heunggongvirae	Uroviricota	Caudoviricetes
RGVC1700	2022NBT-28219	5	1	2561	Viruses	Duplodnaviria	Heunggongvirae	Uroviricota	Caudoviricetes
RGVC1701	2022NBT-28228_2	23	1	2561	Viruses	Duplodnaviria	Heunggongvirae	Uroviricota	Caudoviricetes
RGVC1702	2022NBT-28272	6	1	2561	Viruses	Duplodnaviria	Heunggongvirae	Uroviricota	Caudoviricetes
RGVC1703	2022NBT-28274	2	1	2561	Viruses	Duplodnaviria	Heunggongvirae	Uroviricota	Caudoviricetes
RGVC1704	2022NBT-2829	45	0.9831	2561	Viruses	Duplodnaviria	Heunggongvirae	Uroviricota	Caudoviricetes
RGVC1705	2022NBT-28293	10	1	2561	Viruses	Duplodnaviria	Heunggongvirae	Uroviricota	Caudoviricetes
RGVC1706	2022NBT-283	66	0.9626	2561	Viruses	Duplodnaviria	Heunggongvirae	Uroviricota	Caudoviricetes
RGVC1707	2022NBT-28325_1	35	1	2561	Viruses	Duplodnaviria	Heunggongvirae	Uroviricota	Caudoviricetes
RGVC1708	2022NBT-28327	7	0.8078	2561	Viruses	Duplodnaviria	Heunggongvirae	Uroviricota	Caudoviricetes
RGVC1709	2022NBT-28374_1	28	1	2561	Viruses	Duplodnaviria	Heunggongvirae	Uroviricota	Caudoviricetes
RGVC1710	2022NBT-2841	60	0.9465	2561	Viruses	Duplodnaviria	Heunggongvirae	Uroviricota	Caudoviricetes
RGVC1711	2022NBT-28415	8	1	2561	Viruses	Duplodnaviria	Heunggongvirae	Uroviricota	Caudoviricetes
RGVC1712	2022NBT-28493_1	45	1	2561	Viruses	Duplodnaviria	Heunggongvirae	Uroviricota	Caudoviricetes
RGVC1713	2022NBT-28505	4	1	2561	Viruses	Duplodnaviria	Heunggongvirae	Uroviricota	Caudoviricetes
RGVC1714	2022NBT-28506	7	1	2561	Viruses	Duplodnaviria	Heunggongvirae	Uroviricota	Caudoviricetes
RGVC1715	2022NBT-2851	38	1	2561	Viruses	Duplodnaviria	Heunggongvirae	Uroviricota	Caudoviricetes
RGVC1716	2022NBT-2853	47	0.9573	2561	Viruses	Duplodnaviria	Heunggongvirae	Uroviricota	Caudoviricetes
RGVC1717	2022NBT-28537	19	1	2561	Viruses	Duplodnaviria	Heunggongvirae	Uroviricota	Caudoviricetes
RGVC1718	2022NBT-28540	30	0.9746	2561	Viruses	Duplodnaviria	Heunggongvirae	Uroviricota	Caudoviricetes
RGVC1719	2022NBT-28546	67	1	2561	Viruses	Duplodnaviria	Heunggongvirae	Uroviricota	Caudoviricetes
RGVC1720	2022NBT-2855_1	24	1	2561	Viruses	Duplodnaviria	Heunggongvirae	Uroviricota	Caudoviricetes
RGVC1721	2022NBT-28564	42	1	2561	Viruses	Duplodnaviria	Heunggongvirae	Uroviricota	Caudoviricetes
RGVC1722	2022NBT-2858_1	46	1	2561	Viruses	Duplodnaviria	Heunggongvirae	Uroviricota	Caudoviricetes
RGVC1723	2022NBT-286	48	0.984	2561	Viruses	Duplodnaviria	Heunggongvirae	Uroviricota	Caudoviricetes
RGVC1724	2022NBT-2862_1	19	1	2561	Viruses	Duplodnaviria	Heunggongvirae	Uroviricota	Caudoviricetes
RGVC1725	2022NBT-28621_1	20	1	2561	Viruses	Duplodnaviria	Heunggongvirae	Uroviricota	Caudoviricetes
RGVC1726	2022NBT-28623	45	1	2561	Viruses	Duplodnaviria	Heunggongvirae	Uroviricota	Caudoviricetes
RGVC1727	2022NBT-28659	36	0.9824	2561	Viruses	Duplodnaviria	Heunggongvirae	Uroviricota	Caudoviricetes
RGVC1728	2022NBT-28667	8	1	2561	Viruses	Duplodnaviria	Heunggongvirae	Uroviricota	Caudoviricetes
RGVC1729	2022NBT-28678	17	1	2561	Viruses	Duplodnaviria	Heunggongvirae	Uroviricota	Caudoviricetes
RGVC1730	2022NBT-2868	59	0.9053	2561	Viruses	Duplodnaviria	Heunggongvirae	Uroviricota	Caudoviricetes
RGVC1731	2022NBT-28682	50	1	2561	Viruses	Duplodnaviria	Heunggongvirae	Uroviricota	Caudoviricetes
RGVC1732	2022NBT-28694	52	1	2561	Viruses	Duplodnaviria	Heunggongvirae	Uroviricota	Caudoviricetes
RGVC1733	2022NBT-2873	50	0.9721	2561	Viruses	Duplodnaviria	Heunggongvirae	Uroviricota	Caudoviricetes
RGVC1734	2022NBT-28732	8	1	2561	Viruses	Duplodnaviria	Heunggongvirae	Uroviricota	Caudoviricetes
RGVC1735	2022NBT-28738	9	0.9281	2561	Viruses	Duplodnaviria	Heunggongvirae	Uroviricota	Caudoviricetes
RGVC1736	2022NBT-2878_1	27	1	2561	Viruses	Duplodnaviria	Heunggongvirae	Uroviricota	Caudoviricetes
RGVC1737	2022NBT-28787	25	1	2561	Viruses	Duplodnaviria	Heunggongvirae	Uroviricota	Caudoviricetes
RGVC1738	2022NBT-288	86	0.9864	2561	Viruses	Duplodnaviria	Heunggongvirae	Uroviricota	Caudoviricetes
RGVC1739	2022NBT-28813	7	1	2561	Viruses	Duplodnaviria	Heunggongvirae	Uroviricota	Caudoviricetes
RGVC1740	2022NBT-28815	13	1	2561	Viruses	Duplodnaviria	Heunggongvirae	Uroviricota	Caudoviricetes
RGVC1741	2022NBT-2883	41	0.9588	2561	Viruses	Duplodnaviria	Heunggongvirae	Uroviricota	Caudoviricetes
RGVC1742	2022NBT-2886_1	34	1	2561	Viruses	Duplodnaviria	Heunggongvirae	Uroviricota	Caudoviricetes
RGVC1743	2022NBT-28868_1	13	1	2561	Viruses	Duplodnaviria	Heunggongvirae	Uroviricota	Caudoviricetes
RGVC1744	2022NBT-28872	13	1	2561	Viruses	Duplodnaviria	Heunggongvirae	Uroviricota	Caudoviricetes
RGVC1745	2022NBT-28873	10	1	2561	Viruses	Duplodnaviria	Heunggongvirae	Uroviricota	Caudoviricetes
RGVC1746	2022NBT-2889	31	0.9894	2561	Viruses	Duplodnaviria	Heunggongvirae	Uroviricota	Caudoviricetes
RGVC1747	2022NBT-289	108	0.9788	2561	Viruses	Duplodnaviria	Heunggongvirae	Uroviricota	Caudoviricetes
RGVC1748	2022NBT-2893	49	0.9546	2561	Viruses	Duplodnaviria	Heunggongvirae	Uroviricota	Caudoviricetes
RGVC1749	2022NBT-2896	57	1	2561	Viruses	Duplodnaviria	Heunggongvirae	Uroviricota	Caudoviricetes
RGVC1750	2022NBT-2897	44	0.9565	2561	Viruses	Duplodnaviria	Heunggongvirae	Uroviricota	Caudoviricetes
RGVC1751	2022NBT-29_1	59	1	2561	Viruses	Duplodnaviria	Heunggongvirae	Uroviricota	Caudoviricetes
RGVC1752	2022NBT-29013	10	0.7559	2561	Viruses	Duplodnaviria	Heunggongvirae	Uroviricota	Caudoviricetes
RGVC1753	2022NBT-29085	10	0.9501	2561	Viruses	Duplodnaviria	Heunggongvirae	Uroviricota	Caudoviricetes
RGVC1754	2022NBT-2910_1	47	1	2561	Viruses	Duplodnaviria	Heunggongvirae	Uroviricota	Caudoviricetes
RGVC1755	2022NBT-29106	13	0.9774	2561	Viruses	Duplodnaviria	Heunggongvirae	Uroviricota	Caudoviricetes
RGVC1756	2022NBT-2912	44	0.9746	2561	Viruses	Duplodnaviria	Heunggongvirae	Uroviricota	Caudoviricetes
RGVC1758	2022NBT-2918_1	20	1	2561	Viruses	Duplodnaviria	Heunggongvirae	Uroviricota	Caudoviricetes
RGVC1759	2022NBT-29180	36	1	2561	Viruses	Duplodnaviria	Heunggongvirae	Uroviricota	Caudoviricetes
RGVC1760	2022NBT-29188_1	4	0.887	7220	Viruses	Monodnaviria	Shotokuvirae	Cressdnaviricota	Arfiviricetes	Cirlivirales	Circoviridae
RGVC1761	2022NBT-29196	45	0.9867	2561	Viruses	Duplodnaviria	Heunggongvirae	Uroviricota	Caudoviricetes
RGVC1762	2022NBT-29197	53	1	2561	Viruses	Duplodnaviria	Heunggongvirae	Uroviricota	Caudoviricetes
RGVC1763	2022NBT-292	76	0.9885	2561	Viruses	Duplodnaviria	Heunggongvirae	Uroviricota	Caudoviricetes
RGVC1764	2022NBT-29205	19	1	2561	Viruses	Duplodnaviria	Heunggongvirae	Uroviricota	Caudoviricetes
RGVC1765	2022NBT-29207	5	1	2561	Viruses	Duplodnaviria	Heunggongvirae	Uroviricota	Caudoviricetes
RGVC1766	2022NBT-29217	8	1	2561	Viruses	Duplodnaviria	Heunggongvirae	Uroviricota	Caudoviricetes
RGVC1767	2022NBT-29220	1	1	2561	Viruses	Duplodnaviria	Heunggongvirae	Uroviricota	Caudoviricetes
RGVC1768	2022NBT-29261	6	1	2561	Viruses	Duplodnaviria	Heunggongvirae	Uroviricota	Caudoviricetes
RGVC1769	2022NBT-29269_1	16	1	2561	Viruses	Duplodnaviria	Heunggongvirae	Uroviricota	Caudoviricetes
RGVC1770	2022NBT-29271_1	29	1	2561	Viruses	Duplodnaviria	Heunggongvirae	Uroviricota	Caudoviricetes
RGVC1771	2022NBT-2928_1	126	1	2561	Viruses	Duplodnaviria	Heunggongvirae	Uroviricota	Caudoviricetes
RGVC1772	2022NBT-29288_1	22	1	2561	Viruses	Duplodnaviria	Heunggongvirae	Uroviricota	Caudoviricetes
RGVC1773	2022NBT-293_1	16	1	2561	Viruses	Duplodnaviria	Heunggongvirae	Uroviricota	Caudoviricetes
RGVC1774	2022NBT-2936	33	0.9757	2561	Viruses	Duplodnaviria	Heunggongvirae	Uroviricota	Caudoviricetes
RGVC1775	2022NBT-294	80	0.9683	2561	Viruses	Duplodnaviria	Heunggongvirae	Uroviricota	Caudoviricetes
RGVC1776	2022NBT-2941	32	1	2561	Viruses	Duplodnaviria	Heunggongvirae	Uroviricota	Caudoviricetes
RGVC1777	2022NBT-2942	33	0.9725	2561	Viruses	Duplodnaviria	Heunggongvirae	Uroviricota	Caudoviricetes
RGVC1778	2022NBT-29428	5	1	2561	Viruses	Duplodnaviria	Heunggongvirae	Uroviricota	Caudoviricetes
RGVC1779	2022NBT-29467	11	0.9688	2561	Viruses	Duplodnaviria	Heunggongvirae	Uroviricota	Caudoviricetes
RGVC1780	2022NBT-295	90	0.96	2561	Viruses	Duplodnaviria	Heunggongvirae	Uroviricota	Caudoviricetes
RGVC1781	2022NBT-29528	31	1	2561	Viruses	Duplodnaviria	Heunggongvirae	Uroviricota	Caudoviricetes
RGVC1782	2022NBT-29536	10	1	2561	Viruses	Duplodnaviria	Heunggongvirae	Uroviricota	Caudoviricetes
RGVC1783	2022NBT-29561	19	1	2561	Viruses	Duplodnaviria	Heunggongvirae	Uroviricota	Caudoviricetes
RGVC1784	2022NBT-29566	4	1	2561	Viruses	Duplodnaviria	Heunggongvirae	Uroviricota	Caudoviricetes
RGVC1785	2022NBT-29568	4	1	2561	Viruses	Duplodnaviria	Heunggongvirae	Uroviricota	Caudoviricetes
RGVC1786	2022NBT-29588_1	37	1	2561	Viruses	Duplodnaviria	Heunggongvirae	Uroviricota	Caudoviricetes
RGVC1787	2022NBT-296	90	0.996	2561	Viruses	Duplodnaviria	Heunggongvirae	Uroviricota	Caudoviricetes
RGVC1788	2022NBT-29610	10	1	2561	Viruses	Duplodnaviria	Heunggongvirae	Uroviricota	Caudoviricetes
RGVC1789	2022NBT-29611	4	1	2561	Viruses	Duplodnaviria	Heunggongvirae	Uroviricota	Caudoviricetes
RGVC1790	2022NBT-29613	8	1	2561	Viruses	Duplodnaviria	Heunggongvirae	Uroviricota	Caudoviricetes
RGVC1791	2022NBT-29614	67	1	2561	Viruses	Duplodnaviria	Heunggongvirae	Uroviricota	Caudoviricetes
RGVC1792	2022NBT-2965_1	15	1	2561	Viruses	Duplodnaviria	Heunggongvirae	Uroviricota	Caudoviricetes
RGVC1793	2022NBT-29659	33	1	2561	Viruses	Duplodnaviria	Heunggongvirae	Uroviricota	Caudoviricetes
RGVC1794	2022NBT-2966_1	39	1	2561	Viruses	Duplodnaviria	Heunggongvirae	Uroviricota	Caudoviricetes
RGVC1795	2022NBT-2968	45	0.9731	2561	Viruses	Duplodnaviria	Heunggongvirae	Uroviricota	Caudoviricetes
RGVC1796	2022NBT-29683	8	0.9344	2561	Viruses	Duplodnaviria	Heunggongvirae	Uroviricota	Caudoviricetes
RGVC1797	2022NBT-29688	4	1	2561	Viruses	Duplodnaviria	Heunggongvirae	Uroviricota	Caudoviricetes
RGVC1798	2022NBT-29719	28	1	2561	Viruses	Duplodnaviria	Heunggongvirae	Uroviricota	Caudoviricetes
RGVC1799	2022NBT-2972	38	0.9872	2561	Viruses	Duplodnaviria	Heunggongvirae	Uroviricota	Caudoviricetes
RGVC1800	2022NBT-2973_1	11	1	2561	Viruses	Duplodnaviria	Heunggongvirae	Uroviricota	Caudoviricetes
RGVC1801	2022NBT-2973_2	14	1	2561	Viruses	Duplodnaviria	Heunggongvirae	Uroviricota	Caudoviricetes
RGVC1802	2022NBT-29760	17	1	2561	Viruses	Duplodnaviria	Heunggongvirae	Uroviricota	Caudoviricetes
RGVC1803	2022NBT-29774	60	1	2561	Viruses	Duplodnaviria	Heunggongvirae	Uroviricota	Caudoviricetes
RGVC1804	2022NBT-29784_1	33	1	2561	Viruses	Duplodnaviria	Heunggongvirae	Uroviricota	Caudoviricetes
RGVC1805	2022NBT-29797	4	1	2561	Viruses	Duplodnaviria	Heunggongvirae	Uroviricota	Caudoviricetes
RGVC1806	2022NBT-29801	6	1	2561	Viruses	Duplodnaviria	Heunggongvirae	Uroviricota	Caudoviricetes
RGVC1807	2022NBT-2984	34	0.9729	2561	Viruses	Duplodnaviria	Heunggongvirae	Uroviricota	Caudoviricetes
RGVC1808	2022NBT-29852	12	1	2561	Viruses	Duplodnaviria	Heunggongvirae	Uroviricota	Caudoviricetes
RGVC1809	2022NBT-29864_1	48	1	2561	Viruses	Duplodnaviria	Heunggongvirae	Uroviricota	Caudoviricetes
RGVC1810	2022NBT-2987	36	1	2561	Viruses	Duplodnaviria	Heunggongvirae	Uroviricota	Caudoviricetes
RGVC1811	2022NBT-29878	14	1	2561	Viruses	Duplodnaviria	Heunggongvirae	Uroviricota	Caudoviricetes
RGVC1812	2022NBT-299	85	0.9833	2561	Viruses	Duplodnaviria	Heunggongvirae	Uroviricota	Caudoviricetes
RGVC1813	2022NBT-2992	32	0.9854	2561	Viruses	Duplodnaviria	Heunggongvirae	Uroviricota	Caudoviricetes
RGVC1814	2022NBT-29938	11	1	2561	Viruses	Duplodnaviria	Heunggongvirae	Uroviricota	Caudoviricetes
RGVC1815	2022NBT-2994	48	0.9742	2561	Viruses	Duplodnaviria	Heunggongvirae	Uroviricota	Caudoviricetes
RGVC1816	2022NBT-2995_1	67	1	2561	Viruses	Duplodnaviria	Heunggongvirae	Uroviricota	Caudoviricetes
RGVC1817	2022NBT-2998_1	23	1	2561	Viruses	Duplodnaviria	Heunggongvirae	Uroviricota	Caudoviricetes
RGVC1818	2022NBT-30	95	0.955	2561	Viruses	Duplodnaviria	Heunggongvirae	Uroviricota	Caudoviricetes
RGVC1819	2022NBT-30019_1	36	1	2561	Viruses	Duplodnaviria	Heunggongvirae	Uroviricota	Caudoviricetes
RGVC1820	2022NBT-30048	5	1	2561	Viruses	Duplodnaviria	Heunggongvirae	Uroviricota	Caudoviricetes
RGVC1821	2022NBT-3005	55	1	2561	Viruses	Duplodnaviria	Heunggongvirae	Uroviricota	Caudoviricetes
RGVC1822	2022NBT-3006	49	0.9818	2561	Viruses	Duplodnaviria	Heunggongvirae	Uroviricota	Caudoviricetes
RGVC1823	2022NBT-30067	6	0.8134	2561	Viruses	Duplodnaviria	Heunggongvirae	Uroviricota	Caudoviricetes
RGVC1824	2022NBT-30078_1	36	1	2561	Viruses	Duplodnaviria	Heunggongvirae	Uroviricota	Caudoviricetes
RGVC1825	2022NBT-30090	104	1	2561	Viruses	Duplodnaviria	Heunggongvirae	Uroviricota	Caudoviricetes
RGVC1826	2022NBT-30099	47	1	2561	Viruses	Duplodnaviria	Heunggongvirae	Uroviricota	Caudoviricetes
RGVC1827	2022NBT-3010	41	0.9775	2561	Viruses	Duplodnaviria	Heunggongvirae	Uroviricota	Caudoviricetes
RGVC1828	2022NBT-30102	14	0.943	2561	Viruses	Duplodnaviria	Heunggongvirae	Uroviricota	Caudoviricetes
RGVC1829	2022NBT-3013	48	0.9461	2561	Viruses	Duplodnaviria	Heunggongvirae	Uroviricota	Caudoviricetes
RGVC1830	2022NBT-3014	63	0.9942	2561	Viruses	Duplodnaviria	Heunggongvirae	Uroviricota	Caudoviricetes
RGVC1831	2022NBT-3015_1	29	1	2561	Viruses	Duplodnaviria	Heunggongvirae	Uroviricota	Caudoviricetes
RGVC1832	2022NBT-30161	65	1	2561	Viruses	Duplodnaviria	Heunggongvirae	Uroviricota	Caudoviricetes
RGVC1833	2022NBT-3017	54	0.9924	2561	Viruses	Duplodnaviria	Heunggongvirae	Uroviricota	Caudoviricetes
RGVC1834	2022NBT-302_1	42	1	2561	Viruses	Duplodnaviria	Heunggongvirae	Uroviricota	Caudoviricetes
RGVC1835	2022NBT-30208	4	1	2561	Viruses	Duplodnaviria	Heunggongvirae	Uroviricota	Caudoviricetes
RGVC1836	2022NBT-30210_1	16	1	2561	Viruses	Duplodnaviria	Heunggongvirae	Uroviricota	Caudoviricetes
RGVC1837	2022NBT-30235	8	1	2561	Viruses	Duplodnaviria	Heunggongvirae	Uroviricota	Caudoviricetes
RGVC1838	2022NBT-30236	66	1	2561	Viruses	Duplodnaviria	Heunggongvirae	Uroviricota	Caudoviricetes
RGVC1839	2022NBT-3024	37	0.9885	2561	Viruses	Duplodnaviria	Heunggongvirae	Uroviricota	Caudoviricetes
RGVC1840	2022NBT-30295	5	1	2561	Viruses	Duplodnaviria	Heunggongvirae	Uroviricota	Caudoviricetes
RGVC1841	2022NBT-30311	4	1	2561	Viruses	Duplodnaviria	Heunggongvirae	Uroviricota	Caudoviricetes
RGVC1842	2022NBT-30316	6	1	2561	Viruses	Duplodnaviria	Heunggongvirae	Uroviricota	Caudoviricetes
RGVC1843	2022NBT-3033_1	20	1	2561	Viruses	Duplodnaviria	Heunggongvirae	Uroviricota	Caudoviricetes
RGVC1844	2022NBT-30332	17	1	2561	Viruses	Duplodnaviria	Heunggongvirae	Uroviricota	Caudoviricetes
RGVC1845	2022NBT-3042	55	0.9886	2561	Viruses	Duplodnaviria	Heunggongvirae	Uroviricota	Caudoviricetes
RGVC1846	2022NBT-3043	49	1	2561	Viruses	Duplodnaviria	Heunggongvirae	Uroviricota	Caudoviricetes
RGVC1847	2022NBT-30443	53	1	2561	Viruses	Duplodnaviria	Heunggongvirae	Uroviricota	Caudoviricetes
RGVC1848	2022NBT-30451	17	1	2561	Viruses	Duplodnaviria	Heunggongvirae	Uroviricota	Caudoviricetes
RGVC1849	2022NBT-30459_1	43	1	2561	Viruses	Duplodnaviria	Heunggongvirae	Uroviricota	Caudoviricetes
RGVC1850	2022NBT-3049	48	0.9422	2561	Viruses	Duplodnaviria	Heunggongvirae	Uroviricota	Caudoviricetes
RGVC1851	2022NBT-30494_1	5	1	2561	Viruses	Duplodnaviria	Heunggongvirae	Uroviricota	Caudoviricetes
RGVC1852	2022NBT-305	52	0.993	2561	Viruses	Duplodnaviria	Heunggongvirae	Uroviricota	Caudoviricetes
RGVC1853	2022NBT-30518_1	9	1	2561	Viruses	Duplodnaviria	Heunggongvirae	Uroviricota	Caudoviricetes
RGVC1854	2022NBT-3057	53	0.9933	2561	Viruses	Duplodnaviria	Heunggongvirae	Uroviricota	Caudoviricetes
RGVC1855	2022NBT-306	97	0.9832	2561	Viruses	Duplodnaviria	Heunggongvirae	Uroviricota	Caudoviricetes
RGVC1856	2022NBT-3060	45	0.9936	2561	Viruses	Duplodnaviria	Heunggongvirae	Uroviricota	Caudoviricetes
RGVC1858	2022NBT-30658	40	1	2561	Viruses	Duplodnaviria	Heunggongvirae	Uroviricota	Caudoviricetes
RGVC1859	2022NBT-3066	47	0.9819	2561	Viruses	Duplodnaviria	Heunggongvirae	Uroviricota	Caudoviricetes
RGVC1860	2022NBT-30664	8	1	2561	Viruses	Duplodnaviria	Heunggongvirae	Uroviricota	Caudoviricetes
RGVC1861	2022NBT-30667	15	1	2561	Viruses	Duplodnaviria	Heunggongvirae	Uroviricota	Caudoviricetes
RGVC1862	2022NBT-30670	28	1	2561	Viruses	Duplodnaviria	Heunggongvirae	Uroviricota	Caudoviricetes
RGVC1863	2022NBT-30676	4	1	2561	Viruses	Duplodnaviria	Heunggongvirae	Uroviricota	Caudoviricetes
RGVC1864	2022NBT-3071	38	0.9755	2561	Viruses	Duplodnaviria	Heunggongvirae	Uroviricota	Caudoviricetes
RGVC1865	2022NBT-30795	8	1	2561	Viruses	Duplodnaviria	Heunggongvirae	Uroviricota	Caudoviricetes
RGVC1866	2022NBT-3081	42	0.9769	2561	Viruses	Duplodnaviria	Heunggongvirae	Uroviricota	Caudoviricetes
RGVC1867	2022NBT-30833	13	1	2561	Viruses	Duplodnaviria	Heunggongvirae	Uroviricota	Caudoviricetes
RGVC1868	2022NBT-30841	6	1	2561	Viruses	Duplodnaviria	Heunggongvirae	Uroviricota	Caudoviricetes
RGVC1869	2022NBT-30874	38	1	2561	Viruses	Duplodnaviria	Heunggongvirae	Uroviricota	Caudoviricetes
RGVC1870	2022NBT-30890	13	1	2561	Viruses	Duplodnaviria	Heunggongvirae	Uroviricota	Caudoviricetes
RGVC1871	2022NBT-30903	7	1	2561	Viruses	Duplodnaviria	Heunggongvirae	Uroviricota	Caudoviricetes
RGVC1872	2022NBT-30910	2	1	2561	Viruses	Duplodnaviria	Heunggongvirae	Uroviricota	Caudoviricetes
RGVC1873	2022NBT-30913	13	1	2561	Viruses	Duplodnaviria	Heunggongvirae	Uroviricota	Caudoviricetes
RGVC1874	2022NBT-30917	9	1	2561	Viruses	Duplodnaviria	Heunggongvirae	Uroviricota	Caudoviricetes
RGVC1875	2022NBT-30949	27	1	2561	Viruses	Duplodnaviria	Heunggongvirae	Uroviricota	Caudoviricetes
RGVC1876	2022NBT-30959	6	0.5483	2561	Viruses	Duplodnaviria	Heunggongvirae	Uroviricota	Caudoviricetes
RGVC1877	2022NBT-30994	10	1	2561	Viruses	Duplodnaviria	Heunggongvirae	Uroviricota	Caudoviricetes
RGVC1878	2022NBT-31	84	0.9701	2561	Viruses	Duplodnaviria	Heunggongvirae	Uroviricota	Caudoviricetes
RGVC1879	2022NBT-310	82	0.9842	2561	Viruses	Duplodnaviria	Heunggongvirae	Uroviricota	Caudoviricetes
RGVC1880	2022NBT-31004	3	1	2561	Viruses	Duplodnaviria	Heunggongvirae	Uroviricota	Caudoviricetes
RGVC1881	2022NBT-31007	4	1	2561	Viruses	Duplodnaviria	Heunggongvirae	Uroviricota	Caudoviricetes
RGVC1882	2022NBT-3103	49	1	2561	Viruses	Duplodnaviria	Heunggongvirae	Uroviricota	Caudoviricetes
RGVC1883	2022NBT-31056	10	1	2561	Viruses	Duplodnaviria	Heunggongvirae	Uroviricota	Caudoviricetes
RGVC1884	2022NBT-3106_1	42	1	2561	Viruses	Duplodnaviria	Heunggongvirae	Uroviricota	Caudoviricetes
RGVC1885	2022NBT-31065	49	1	2561	Viruses	Duplodnaviria	Heunggongvirae	Uroviricota	Caudoviricetes
RGVC1886	2022NBT-31067	17	1	2561	Viruses	Duplodnaviria	Heunggongvirae	Uroviricota	Caudoviricetes
RGVC1887	2022NBT-31068	8	1	2561	Viruses	Duplodnaviria	Heunggongvirae	Uroviricota	Caudoviricetes
RGVC1888	2022NBT-3107	35	0.9849	2561	Viruses	Duplodnaviria	Heunggongvirae	Uroviricota	Caudoviricetes
RGVC1889	2022NBT-31084	9	1	2561	Viruses	Duplodnaviria	Heunggongvirae	Uroviricota	Caudoviricetes
RGVC1890	2022NBT-311	66	0.9843	2561	Viruses	Duplodnaviria	Heunggongvirae	Uroviricota	Caudoviricetes
RGVC1891	2022NBT-3110	60	0.9884	2561	Viruses	Duplodnaviria	Heunggongvirae	Uroviricota	Caudoviricetes
RGVC1892	2022NBT-31107	11	0.9446	2561	Viruses	Duplodnaviria	Heunggongvirae	Uroviricota	Caudoviricetes
RGVC1893	2022NBT-31110	22	0.9824	2561	Viruses	Duplodnaviria	Heunggongvirae	Uroviricota	Caudoviricetes
RGVC1894	2022NBT-3116	38	1	2561	Viruses	Duplodnaviria	Heunggongvirae	Uroviricota	Caudoviricetes
RGVC1895	2022NBT-31197	6	1	2561	Viruses	Duplodnaviria	Heunggongvirae	Uroviricota	Caudoviricetes
RGVC1896	2022NBT-312_1	46	1	2561	Viruses	Duplodnaviria	Heunggongvirae	Uroviricota	Caudoviricetes
RGVC1897	2022NBT-31205	19	1	2561	Viruses	Duplodnaviria	Heunggongvirae	Uroviricota	Caudoviricetes
RGVC1898	2022NBT-31209	10	1	2561	Viruses	Duplodnaviria	Heunggongvirae	Uroviricota	Caudoviricetes
RGVC1899	2022NBT-31216	14	0.9503	2561	Viruses	Duplodnaviria	Heunggongvirae	Uroviricota	Caudoviricetes
RGVC1900	2022NBT-3122_1	45	1	2561	Viruses	Duplodnaviria	Heunggongvirae	Uroviricota	Caudoviricetes
RGVC1901	2022NBT-31248_1	9	1	2561	Viruses	Duplodnaviria	Heunggongvirae	Uroviricota	Caudoviricetes
RGVC1902	2022NBT-3126_1	19	1	2561	Viruses	Duplodnaviria	Heunggongvirae	Uroviricota	Caudoviricetes
RGVC1903	2022NBT-31260	14	1	2561	Viruses	Duplodnaviria	Heunggongvirae	Uroviricota	Caudoviricetes
RGVC1904	2022NBT-3127_1	42	1	2561	Viruses	Duplodnaviria	Heunggongvirae	Uroviricota	Caudoviricetes
RGVC1905	2022NBT-31302	10	1	2561	Viruses	Duplodnaviria	Heunggongvirae	Uroviricota	Caudoviricetes
RGVC1906	2022NBT-31336_1	53	1	2561	Viruses	Duplodnaviria	Heunggongvirae	Uroviricota	Caudoviricetes
RGVC1907	2022NBT-31373	13	0.9076	2561	Viruses	Duplodnaviria	Heunggongvirae	Uroviricota	Caudoviricetes
RGVC1908	2022NBT-31382	12	1	2561	Viruses	Duplodnaviria	Heunggongvirae	Uroviricota	Caudoviricetes
RGVC1909	2022NBT-31390	5	1	2561	Viruses	Duplodnaviria	Heunggongvirae	Uroviricota	Caudoviricetes
RGVC1910	2022NBT-31448	10	1	2561	Viruses	Duplodnaviria	Heunggongvirae	Uroviricota	Caudoviricetes
RGVC1911	2022NBT-31450_1	18	1	2561	Viruses	Duplodnaviria	Heunggongvirae	Uroviricota	Caudoviricetes
RGVC1912	2022NBT-31452	2	0.7304	7220	Viruses	Monodnaviria	Shotokuvirae	Cressdnaviricota	Arfiviricetes	Cirlivirales	Circoviridae
RGVC1913	2022NBT-31464	47	1	2561	Viruses	Duplodnaviria	Heunggongvirae	Uroviricota	Caudoviricetes
RGVC1914	2022NBT-3148	40	0.9882	2561	Viruses	Duplodnaviria	Heunggongvirae	Uroviricota	Caudoviricetes
RGVC1915	2022NBT-31519	51	1	2561	Viruses	Duplodnaviria	Heunggongvirae	Uroviricota	Caudoviricetes
RGVC1916	2022NBT-3152	75	1	2561	Viruses	Duplodnaviria	Heunggongvirae	Uroviricota	Caudoviricetes
RGVC1917	2022NBT-31549_1	17	1	2561	Viruses	Duplodnaviria	Heunggongvirae	Uroviricota	Caudoviricetes
RGVC1918	2022NBT-31554	8	1	2561	Viruses	Duplodnaviria	Heunggongvirae	Uroviricota	Caudoviricetes
RGVC1919	2022NBT-31573	11	1	2561	Viruses	Duplodnaviria	Heunggongvirae	Uroviricota	Caudoviricetes
RGVC1920	2022NBT-31616	12	1	2561	Viruses	Duplodnaviria	Heunggongvirae	Uroviricota	Caudoviricetes
RGVC1921	2022NBT-31634_1	24	1	2561	Viruses	Duplodnaviria	Heunggongvirae	Uroviricota	Caudoviricetes
RGVC1922	2022NBT-31653_1	34	1	2561	Viruses	Duplodnaviria	Heunggongvirae	Uroviricota	Caudoviricetes
RGVC1923	2022NBT-31665	4	1	2561	Viruses	Duplodnaviria	Heunggongvirae	Uroviricota	Caudoviricetes
RGVC1924	2022NBT-31676	35	1	2561	Viruses	Duplodnaviria	Heunggongvirae	Uroviricota	Caudoviricetes
RGVC1925	2022NBT-3168	42	0.9695	2561	Viruses	Duplodnaviria	Heunggongvirae	Uroviricota	Caudoviricetes
RGVC1926	2022NBT-31682	9	0.9711	2561	Viruses	Duplodnaviria	Heunggongvirae	Uroviricota	Caudoviricetes
RGVC1927	2022NBT-31719	2	1	2561	Viruses	Duplodnaviria	Heunggongvirae	Uroviricota	Caudoviricetes
RGVC1928	2022NBT-31721	68	1	2561	Viruses	Duplodnaviria	Heunggongvirae	Uroviricota	Caudoviricetes
RGVC1929	2022NBT-31726_1	36	1	2561	Viruses	Duplodnaviria	Heunggongvirae	Uroviricota	Caudoviricetes
RGVC1930	2022NBT-3174	39	0.9891	2561	Viruses	Duplodnaviria	Heunggongvirae	Uroviricota	Caudoviricetes
RGVC1931	2022NBT-3175	27	0.9498	2561	Viruses	Duplodnaviria	Heunggongvirae	Uroviricota	Caudoviricetes
RGVC1932	2022NBT-3176_1	19	0.9646	2561	Viruses	Duplodnaviria	Heunggongvirae	Uroviricota	Caudoviricetes
RGVC1933	2022NBT-31765	12	1	2561	Viruses	Duplodnaviria	Heunggongvirae	Uroviricota	Caudoviricetes
RGVC1934	2022NBT-31767	12	1	2561	Viruses	Duplodnaviria	Heunggongvirae	Uroviricota	Caudoviricetes
RGVC1935	2022NBT-3179	39	0.9775	2561	Viruses	Duplodnaviria	Heunggongvirae	Uroviricota	Caudoviricetes
RGVC1936	2022NBT-31801	20	1	2561	Viruses	Duplodnaviria	Heunggongvirae	Uroviricota	Caudoviricetes
RGVC1937	2022NBT-31812	8	0.9456	2561	Viruses	Duplodnaviria	Heunggongvirae	Uroviricota	Caudoviricetes
RGVC1938	2022NBT-31836	30	1	2561	Viruses	Duplodnaviria	Heunggongvirae	Uroviricota	Caudoviricetes
RGVC1939	2022NBT-3184	45	0.9717	2561	Viruses	Duplodnaviria	Heunggongvirae	Uroviricota	Caudoviricetes
RGVC1940	2022NBT-3185	41	0.9898	2561	Viruses	Duplodnaviria	Heunggongvirae	Uroviricota	Caudoviricetes
RGVC1941	2022NBT-3192	55	0.9536	2561	Viruses	Duplodnaviria	Heunggongvirae	Uroviricota	Caudoviricetes
RGVC1942	2022NBT-31973	76	1	2561	Viruses	Duplodnaviria	Heunggongvirae	Uroviricota	Caudoviricetes
RGVC1943	2022NBT-31979	3	1	2561	Viruses	Duplodnaviria	Heunggongvirae	Uroviricota	Caudoviricetes
RGVC1945	2022NBT-320	117	0.9889	2561	Viruses	Duplodnaviria	Heunggongvirae	Uroviricota	Caudoviricetes
RGVC1946	2022NBT-32004	16	1	2561	Viruses	Duplodnaviria	Heunggongvirae	Uroviricota	Caudoviricetes
RGVC1947	2022NBT-32019_1	43	1	2561	Viruses	Duplodnaviria	Heunggongvirae	Uroviricota	Caudoviricetes
RGVC1948	2022NBT-32027_1	29	1	2561	Viruses	Duplodnaviria	Heunggongvirae	Uroviricota	Caudoviricetes
RGVC1949	2022NBT-32033_1	45	1	2561	Viruses	Duplodnaviria	Heunggongvirae	Uroviricota	Caudoviricetes
RGVC1950	2022NBT-3205	27	1	2561	Viruses	Duplodnaviria	Heunggongvirae	Uroviricota	Caudoviricetes
RGVC1951	2022NBT-3206_1	43	1	2561	Viruses	Duplodnaviria	Heunggongvirae	Uroviricota	Caudoviricetes
RGVC1952	2022NBT-32069	44	1	2561	Viruses	Duplodnaviria	Heunggongvirae	Uroviricota	Caudoviricetes
RGVC1953	2022NBT-32071	7	0.7939	2561	Viruses	Duplodnaviria	Heunggongvirae	Uroviricota	Caudoviricetes
RGVC1954	2022NBT-32097	23	1	2561	Viruses	Duplodnaviria	Heunggongvirae	Uroviricota	Caudoviricetes
RGVC1955	2022NBT-3211	64	0.9693	2561	Viruses	Duplodnaviria	Heunggongvirae	Uroviricota	Caudoviricetes
RGVC1956	2022NBT-32128	61	1	2561	Viruses	Duplodnaviria	Heunggongvirae	Uroviricota	Caudoviricetes
RGVC1957	2022NBT-3214_1	23	1	2561	Viruses	Duplodnaviria	Heunggongvirae	Uroviricota	Caudoviricetes
RGVC1958	2022NBT-3216	28	1	2561	Viruses	Duplodnaviria	Heunggongvirae	Uroviricota	Caudoviricetes
RGVC1959	2022NBT-3218	45	0.9634	2561	Viruses	Duplodnaviria	Heunggongvirae	Uroviricota	Caudoviricetes
RGVC1960	2022NBT-32199	10	1	2561	Viruses	Duplodnaviria	Heunggongvirae	Uroviricota	Caudoviricetes
RGVC1961	2022NBT-322	101	0.9628	2561	Viruses	Duplodnaviria	Heunggongvirae	Uroviricota	Caudoviricetes
RGVC1962	2022NBT-32212_1	8	1	2561	Viruses	Duplodnaviria	Heunggongvirae	Uroviricota	Caudoviricetes
RGVC1963	2022NBT-32244	17	1	2561	Viruses	Duplodnaviria	Heunggongvirae	Uroviricota	Caudoviricetes
RGVC1964	2022NBT-3225	42	0.9872	2561	Viruses	Duplodnaviria	Heunggongvirae	Uroviricota	Caudoviricetes
RGVC1965	2022NBT-3226_1	45	1	2561	Viruses	Duplodnaviria	Heunggongvirae	Uroviricota	Caudoviricetes
RGVC1966	2022NBT-32271	5	1	2561	Viruses	Duplodnaviria	Heunggongvirae	Uroviricota	Caudoviricetes
RGVC1967	2022NBT-32273	14	1	2561	Viruses	Duplodnaviria	Heunggongvirae	Uroviricota	Caudoviricetes
RGVC1968	2022NBT-32292	39	1	2561	Viruses	Duplodnaviria	Heunggongvirae	Uroviricota	Caudoviricetes
RGVC1969	2022NBT-32319	7	1	2561	Viruses	Duplodnaviria	Heunggongvirae	Uroviricota	Caudoviricetes
RGVC1970	2022NBT-32379	6	1	2561	Viruses	Duplodnaviria	Heunggongvirae	Uroviricota	Caudoviricetes
RGVC1971	2022NBT-3239_1	24	1	2561	Viruses	Duplodnaviria	Heunggongvirae	Uroviricota	Caudoviricetes
RGVC1972	2022NBT-32392_1	25	1	2561	Viruses	Duplodnaviria	Heunggongvirae	Uroviricota	Caudoviricetes
RGVC1973	2022NBT-324	89	1	2561	Viruses	Duplodnaviria	Heunggongvirae	Uroviricota	Caudoviricetes
RGVC1974	2022NBT-32431	46	1	2561	Viruses	Duplodnaviria	Heunggongvirae	Uroviricota	Caudoviricetes
RGVC1975	2022NBT-32443_1	40	1	2561	Viruses	Duplodnaviria	Heunggongvirae	Uroviricota	Caudoviricetes
RGVC1976	2022NBT-32464	44	1	2561	Viruses	Duplodnaviria	Heunggongvirae	Uroviricota	Caudoviricetes
RGVC1977	2022NBT-32489	33	1	2561	Viruses	Duplodnaviria	Heunggongvirae	Uroviricota	Caudoviricetes
RGVC1978	2022NBT-32503_1	33	1	2561	Viruses	Duplodnaviria	Heunggongvirae	Uroviricota	Caudoviricetes
RGVC1979	2022NBT-32504	6	1	2561	Viruses	Duplodnaviria	Heunggongvirae	Uroviricota	Caudoviricetes
RGVC1980	2022NBT-32566	7	1	2561	Viruses	Duplodnaviria	Heunggongvirae	Uroviricota	Caudoviricetes
RGVC1981	2022NBT-32569	5	1	1	Viruses
RGVC1982	2022NBT-3258	32	1	2561	Viruses	Duplodnaviria	Heunggongvirae	Uroviricota	Caudoviricetes
RGVC1983	2022NBT-32597	10	1	2561	Viruses	Duplodnaviria	Heunggongvirae	Uroviricota	Caudoviricetes
RGVC1984	2022NBT-32638	28	1	2561	Viruses	Duplodnaviria	Heunggongvirae	Uroviricota	Caudoviricetes
RGVC1985	2022NBT-3265	43	0.9549	2561	Viruses	Duplodnaviria	Heunggongvirae	Uroviricota	Caudoviricetes
RGVC1986	2022NBT-32673	20	0.9498	2561	Viruses	Duplodnaviria	Heunggongvirae	Uroviricota	Caudoviricetes
RGVC1987	2022NBT-32682_1	22	1	2561	Viruses	Duplodnaviria	Heunggongvirae	Uroviricota	Caudoviricetes
RGVC1988	2022NBT-32690	37	1	2561	Viruses	Duplodnaviria	Heunggongvirae	Uroviricota	Caudoviricetes
RGVC1989	2022NBT-32703_1	36	1	2561	Viruses	Duplodnaviria	Heunggongvirae	Uroviricota	Caudoviricetes
RGVC1990	2022NBT-32711_1	45	1	2561	Viruses	Duplodnaviria	Heunggongvirae	Uroviricota	Caudoviricetes
RGVC1991	2022NBT-32716	63	1	2561	Viruses	Duplodnaviria	Heunggongvirae	Uroviricota	Caudoviricetes
RGVC1992	2022NBT-3272	32	0.9343	2561	Viruses	Duplodnaviria	Heunggongvirae	Uroviricota	Caudoviricetes
RGVC1993	2022NBT-32736	20	1	2561	Viruses	Duplodnaviria	Heunggongvirae	Uroviricota	Caudoviricetes
RGVC1994	2022NBT-32741	13	1	2561	Viruses	Duplodnaviria	Heunggongvirae	Uroviricota	Caudoviricetes
RGVC1995	2022NBT-32751	9	1	2561	Viruses	Duplodnaviria	Heunggongvirae	Uroviricota	Caudoviricetes
RGVC1996	2022NBT-32806	15	1	2561	Viruses	Duplodnaviria	Heunggongvirae	Uroviricota	Caudoviricetes
RGVC1997	2022NBT-3286_1	31	1	2561	Viruses	Duplodnaviria	Heunggongvirae	Uroviricota	Caudoviricetes
RGVC1998	2022NBT-3287	32	0.977	2561	Viruses	Duplodnaviria	Heunggongvirae	Uroviricota	Caudoviricetes
RGVC1999	2022NBT-329	85	0.989	2561	Viruses	Duplodnaviria	Heunggongvirae	Uroviricota	Caudoviricetes
RGVC2000	2022NBT-32906	12	1	2561	Viruses	Duplodnaviria	Heunggongvirae	Uroviricota	Caudoviricetes
RGVC2001	2022NBT-32959	11	1	2561	Viruses	Duplodnaviria	Heunggongvirae	Uroviricota	Caudoviricetes
RGVC2002	2022NBT-32972	38	1	2561	Viruses	Duplodnaviria	Heunggongvirae	Uroviricota	Caudoviricetes
RGVC2003	2022NBT-33	117	0.9658	2561	Viruses	Duplodnaviria	Heunggongvirae	Uroviricota	Caudoviricetes
RGVC2004	2022NBT-33001_1	45	1	2561	Viruses	Duplodnaviria	Heunggongvirae	Uroviricota	Caudoviricetes
RGVC2005	2022NBT-3301	27	1	2561	Viruses	Duplodnaviria	Heunggongvirae	Uroviricota	Caudoviricetes
RGVC2006	2022NBT-3304	44	0.9816	2561	Viruses	Duplodnaviria	Heunggongvirae	Uroviricota	Caudoviricetes
RGVC2007	2022NBT-33042_1	16	0.9273	2561	Viruses	Duplodnaviria	Heunggongvirae	Uroviricota	Caudoviricetes
RGVC2008	2022NBT-33053	8	1	2561	Viruses	Duplodnaviria	Heunggongvirae	Uroviricota	Caudoviricetes
RGVC2009	2022NBT-33056	55	1	2561	Viruses	Duplodnaviria	Heunggongvirae	Uroviricota	Caudoviricetes
RGVC2010	2022NBT-3307	67	0.9756	2561	Viruses	Duplodnaviria	Heunggongvirae	Uroviricota	Caudoviricetes
RGVC2011	2022NBT-3308	56	0.9639	2561	Viruses	Duplodnaviria	Heunggongvirae	Uroviricota	Caudoviricetes
RGVC2012	2022NBT-3309_1	26	1	2561	Viruses	Duplodnaviria	Heunggongvirae	Uroviricota	Caudoviricetes
RGVC2013	2022NBT-33129	34	1	2561	Viruses	Duplodnaviria	Heunggongvirae	Uroviricota	Caudoviricetes
RGVC2014	2022NBT-3313_2	59	1	2561	Viruses	Duplodnaviria	Heunggongvirae	Uroviricota	Caudoviricetes
RGVC2015	2022NBT-3315	44	0.9875	2561	Viruses	Duplodnaviria	Heunggongvirae	Uroviricota	Caudoviricetes
RGVC2016	2022NBT-33172_1	30	1	2561	Viruses	Duplodnaviria	Heunggongvirae	Uroviricota	Caudoviricetes
RGVC2017	2022NBT-33186_1	34	1	2561	Viruses	Duplodnaviria	Heunggongvirae	Uroviricota	Caudoviricetes
[truncated: 41,395 more rows]
