# Supplementary material for: Spatial heterogeneity of viral communities across the gastrointestinal tracts of ruminants
Source: Research Square preprint supplement (doi:10.21203/rs.3.rs-4244627/v1), 2024-04-10
Supplement: Supplementary file 12 [file a1bc9f228d43cdcf058dc58f.xlsx]

## Sheet: Table S10 
Table S10. Quality reports of 659 MAGs from HiFi and Nanopore sequencings
Name	Completeness	Contamination	Completeness_Model_Used	Translation_Table_Used	Coding_Density	Contig_N50	Average_Gene_Length	Genome_Size	GC_Content	Total_Coding_Sequences	Additional_Notes	Origin
Bin.1075	84.28	0.01	Gradient Boost (General Model)	11	0.909	323814	382.402	1903496	0.56	1511	None	Nanopore
Bin.1092	66.51	0.16	Neural Network (Specific Model)	11	0.928	342249	361.143	1445953	0.56	1241	None	Nanopore
Bin.1138	60.67	1.36	Gradient Boost (General Model)	11	0.919	196226	336.963	928695	0.35	846	None	Nanopore
Bin.1154	86.92	3.03	Gradient Boost (General Model)	11	0.875	361647	311.946	1624498	0.6	1520	None	Nanopore
Bin.1321	53.03	1.42	Neural Network (Specific Model)	11	0.907	111624	359.106	1715402	0.47	1447	None	Nanopore
Bin.1367	71.35	0.3	Gradient Boost (General Model)	11	0.888	275405	363.358	2341672	0.46	1909	None	Nanopore
Bin.1446	91.34	0.31	Gradient Boost (General Model)	11	0.933	347648	372.11	2178895	0.49	1824	None	Nanopore
Bin.1473	68.93	1.12	Gradient Boost (General Model)	11	0.858	401317	330.842	1512713	0.39	1309	None	Nanopore
Bin.1475	62.96	1.46	Gradient Boost (General Model)	11	0.875	116124	307.643	1161701	0.54	1104	None	Nanopore
Bin.1526	88.02	8.1	Gradient Boost (General Model)	11	0.866	79564	312.853	1998436	0.45	1848	None	Nanopore
Bin.1679	69.83	0.78	Neural Network (Specific Model)	11	0.891	199053	389.359	2487646	0.52	1900	None	Nanopore
Bin.1732	71.28	0.12	Gradient Boost (General Model)	11	0.91	199156	318.949	1262081	0.55	1203	None	Nanopore
Bin.1736	75.91	0.6	Neural Network (Specific Model)	11	0.899	123497	325.718	2169999	0.41	1999	None	Nanopore
Bin.1751	57.45	4.21	Neural Network (Specific Model)	11	0.855	104768	298.529	2058559	0.39	1970	None	Nanopore
Bin.1768	74.59	4.97	Gradient Boost (General Model)	11	0.862	80700	360.931	4061926	0.35	3238	None	Nanopore
Bin.1800	59.61	2.92	Neural Network (Specific Model)	11	0.894	130884	340.415	1605835	0.48	1408	None	Nanopore
Bin.1841	74.26	2.93	Gradient Boost (General Model)	11	0.872	202638	322.162	2621334	0.49	2370	None	Nanopore
Bin.1856	72.02	1.43	Neural Network (Specific Model)	11	0.899	133207	338.42	1894160	0.48	1682	None	Nanopore
Bin.1895	66.06	0.04	Gradient Boost (General Model)	11	0.915	231799	340.611	696417	0.48	625	None	Nanopore
Bin.1913	89.38	4.32	Neural Network (Specific Model)	11	0.867	187547	317.692	3491852	0.33	3182	None	Nanopore
Bin.203	65.24	2.68	Neural Network (Specific Model)	11	0.928	214705	349.147	1637411	0.49	1454	None	Nanopore
Bin.2033	79.45	0.21	Neural Network (Specific Model)	11	0.907	239104	391.122	3093473	0.48	2394	None	Nanopore
Bin.2074	70.59	0.33	Gradient Boost (General Model)	11	0.879	231295	359.602	1918232	0.52	1564	None	Nanopore
Bin.2092	56.48	0	Gradient Boost (General Model)	11	0.88	217659	367.994	1387973	0.54	1107	None	Nanopore
Bin.2165	58.43	4.26	Neural Network (Specific Model)	11	0.938	188086	394.414	1851100	0.62	1470	None	Nanopore
Bin.2167	64.14	1.45	Gradient Boost (General Model)	11	0.897	138328	369.166	1721381	0.55	1397	None	Nanopore
Bin.2369	70.38	4.42	Gradient Boost (General Model)	11	0.885	86008	335.693	1796480	0.42	1582	None	Nanopore
Bin.2415	92.23	0.45	Neural Network (Specific Model)	11	0.906	278423	314.909	1509987	0.59	1451	None	Nanopore
Bin.2608	57.39	0.4	Gradient Boost (General Model)	11	0.857	63088	295.807	1874452	0.37	1816	None	Nanopore
Bin.2615	56.59	2.7	Neural Network (Specific Model)	11	0.881	161430	362.937	2244120	0.47	1821	None	Nanopore
Bin.2676	78.67	0.97	Gradient Boost (General Model)	11	0.891	125610	351.667	1470755	0.44	1244	None	Nanopore
Bin.2697	74.41	3.6	Neural Network (Specific Model)	11	0.882	153183	348.308	2433293	0.48	2058	None	Nanopore
Bin.270	95.25	0.88	Gradient Boost (General Model)	11	0.864	227333	338.918	3214038	0.52	2735	None	Nanopore
Bin.2726	53.71	0.1	Neural Network (Specific Model)	11	0.909	353420	379.715	1647508	0.57	1317	None	Nanopore
Bin.2969	65.73	3.47	Gradient Boost (General Model)	11	0.938	211875	375.024	1613277	0.57	1348	None	Nanopore
Bin.3017	65.33	5.73	Gradient Boost (General Model)	11	0.921	119779	380.707	1919701	0.63	1552	None	Nanopore
Bin.305	70.37	2.54	Neural Network (Specific Model)	11	0.873	514182	329.114	1759366	0.6	1558	None	Nanopore
Bin.3053	57.78	0.16	Neural Network (Specific Model)	11	0.91	143219	370.97	1798968	0.47	1475	None	Nanopore
Bin.3099	74.85	3.25	Gradient Boost (General Model)	11	0.866	358072	308.486	1302672	0.32	1221	None	Nanopore
Bin.3245	60.76	0.64	Neural Network (Specific Model)	11	0.893	197069	344.976	2175329	0.5	1879	None	Nanopore
Bin.3293	57.57	0.11	Neural Network (Specific Model)	11	0.933	202006	373.598	1385203	0.55	1155	None	Nanopore
Bin.3387	76.74	0.69	Neural Network (Specific Model)	11	0.893	128062	381.262	2781796	0.5	2175	None	Nanopore
Bin.3490	95.58	0.25	Neural Network (Specific Model)	11	0.894	567592	306.238	779629	0.45	761	None	Nanopore
Bin.3492	71.75	1.14	Gradient Boost (General Model)	11	0.913	194805	342.07	1614446	0.47	1438	None	Nanopore
Bin.3502	65.95	0.59	Neural Network (Specific Model)	11	0.86	78700	310.194	1969141	0.46	1826	None	Nanopore
Bin.3521	75.79	0.45	Neural Network (Specific Model)	11	0.894	144818	371.079	2531773	0.46	2036	None	Nanopore
Bin.3578	57.01	0.02	Neural Network (Specific Model)	11	0.889	127130	352.022	1458440	0.57	1230	None	Nanopore
Bin.3641	67.88	0	Gradient Boost (General Model)	11	0.867	103351	331.202	1496898	0.32	1309	None	Nanopore
Bin.3717	51.44	0.42	Neural Network (Specific Model)	11	0.881	156921	300.972	1067613	0.34	1043	None	Nanopore
Bin.3736	53.3	2.17	Gradient Boost (General Model)	11	0.905	229004	366.474	1354386	0.48	1118	None	Nanopore
Bin.3775	99.28	0.06	Neural Network (Specific Model)	11	0.907	487089	370.11	2819848	0.42	2306	None	Nanopore
Bin.378	75.75	0.11	Neural Network (Specific Model)	11	0.886	268842	309.363	795666	0.44	761	None	Nanopore
Bin.3963	91.81	2.54	Gradient Boost (General Model)	11	0.893	589353	340.245	1482693	0.49	1300	None	Nanopore
Bin.4020	57.27	3.46	Gradient Boost (General Model)	11	0.914	493184	324.363	921052	0.45	868	None	Nanopore
Bin.4065	92.85	1.05	Gradient Boost (General Model)	11	0.9	235744	316.634	1493441	0.44	1417	None	Nanopore
Bin.413	90.67	0.84	Neural Network (Specific Model)	11	0.871	146876	332.424	2844364	0.4	2487	None	Nanopore
Bin.4304	55.54	0.01	Gradient Boost (General Model)	11	0.788	297383	341.726	1249778	0.4	962	None	Nanopore
Bin.4309	67.46	0.37	Neural Network (Specific Model)	11	0.931	778185	362.381	1399194	0.45	1201	None	Nanopore
Bin.437	71.5	0.17	Gradient Boost (General Model)	11	0.892	348469	368.225	1752305	0.42	1416	None	Nanopore
Bin.527	54.41	7.93	Gradient Boost (General Model)	11	0.852	217959	309.929	1635790	0.49	1502	None	Nanopore
Bin.529	73.61	1.3	Gradient Boost (General Model)	11	0.93	292834	318.696	1324264	0.5	1292	None	Nanopore
Bin.567	56.85	0.06	Neural Network (Specific Model)	11	0.915	145285	299.922	877112	0.57	893	None	Nanopore
Bin.569	73.46	3.26	Gradient Boost (General Model)	11	0.857	113932	311.6	764330	0.35	703	None	Nanopore
Bin.685	70.78	0.57	Gradient Boost (General Model)	11	0.929	426299	367.499	1454881	0.6	1228	None	Nanopore
Bin.707	99.6	1.26	Neural Network (Specific Model)	11	0.822	3213864	322.989	3213864	0.37	2730	None	Nanopore
Bin.723	72.16	0.02	Gradient Boost (General Model)	11	0.904	282165	353.75	1568757	0.56	1338	None	Nanopore
Bin.819	69.86	0.65	Gradient Boost (General Model)	11	0.886	130595	326.416	1432007	0.54	1299	None	Nanopore
Bin.977	62.26	4.08	Neural Network (Specific Model)	11	0.897	211306	367.884	2273442	0.49	1850	None	Nanopore
dairy-flye.maxbin.024.contigs	79.98	7.82	Gradient Boost (General Model)	11	0.876	65497	258.025	2659671	0.5	3024	None	HiFi
dairy-flye.maxbin.112.contigs	92.78	1.06	Gradient Boost (General Model)	11	0.872	1187025	321.762	1871120	0.45	1694	None	HiFi
dairy-flye.metabat2.293.contigs	59.95	0.84	Gradient Boost (General Model)	11	0.857	250108	291.324	3104294	0.59	3057	None	HiFi
dairy-flye.metabat2.388_sub.contigs	58	6.39	Neural Network (Specific Model)	11	0.856	1883683	243.376	2874428	0.53	3393	None	HiFi
dairy-flye.metabat2.405.contigs	59.78	2.3	Gradient Boost (General Model)	11	0.855	602735	220.141	2667499	0.56	3478	None	HiFi
dairy-flye.metabat2.477.contigs	61.18	1.98	Gradient Boost (General Model)	11	0.858	96459	256.684	2065813	0.55	2318	None	HiFi
dairy-flye.metabat2.794.contigs	88.46	1.02	Gradient Boost (General Model)	11	0.889	908333	262.871	908333	0.38	1027	None	HiFi
dairy-flye.metabat2.803.contigs	71.45	7.43	Gradient Boost (General Model)	11	0.809	54687	223.587	1764222	0.29	2135	None	HiFi
dairy-flye.metabat2.827.contigs	63.42	0.6	Gradient Boost (General Model)	11	0.895	98436	310.784	941246	0.4	906	None	HiFi
dairy-hifi.metabat2.247.contigs	64.65	7.15	Gradient Boost (General Model)	11	0.915	92759	277.32	955987	0.3	1054	None	HiFi
dairy-hifi.metabat2.491.contigs	73.41	1.25	Gradient Boost (General Model)	11	0.921	87580	318.93	2029636	0.57	1959	None	HiFi
dairy-hifi.metabat2.770.contigs	59.61	0.09	Gradient Boost (General Model)	11	0.893	66806	294.778	789638	0.3	799	None	HiFi
goat-flye.concoct.078.contigs	81.71	2.66	Gradient Boost (General Model)	11	0.661	67568	279.672	5545129	0.37	4383	None	HiFi
goat-flye.concoct.093_sub.contigs	62.16	0.22	Gradient Boost (General Model)	11	0.882	49934	317.486	1370158	0.29	1272	None	HiFi
goat-flye.concoct.108.contigs	77.73	0.31	Gradient Boost (General Model)	11	0.895	66835	328.617	2414685	0.56	2198	None	HiFi
goat-flye.maxbin.017.contigs	96.95	1.39	Gradient Boost (General Model)	11	0.924	2771882	373.553	2876129	0.48	2374	None	HiFi
goat-flye.maxbin.018.contigs	98.79	0.05	Gradient Boost (General Model)	11	0.88	2537546	347.466	2554786	0.56	2159	None	HiFi
goat-flye.maxbin.021.contigs	100	0.67	Gradient Boost (General Model)	11	0.926	2685090	344.192	2735384	0.48	2462	None	HiFi
goat-flye.maxbin.031.contigs	97.56	0.57	Gradient Boost (General Model)	11	0.872	1592400	322.516	2483380	0.6	2242	None	HiFi
goat-flye.maxbin.044.contigs	97.25	0.34	Gradient Boost (General Model)	11	0.943	2234811	375.876	2234811	0.54	1871	None	HiFi
goat-flye.maxbin.050.contigs	85.76	0.93	Neural Network (Specific Model)	4	0.929	562157	313.872	562157	0.28	556	None	HiFi
goat-flye.maxbin.051.contigs	98.18	0.01	Gradient Boost (General Model)	11	0.899	984940	294.099	1134678	0.34	1158	None	HiFi
goat-flye.maxbin.054.contigs	97.6	0.67	Gradient Boost (General Model)	11	0.928	1905163	360.015	3305557	0.56	2845	None	HiFi
goat-flye.maxbin.065.contigs	98.15	0.16	Neural Network (Specific Model)	11	0.904	742201	332.159	742201	0.52	675	None	HiFi
goat-flye.maxbin.072.contigs	97.79	0.39	Gradient Boost (General Model)	11	0.872	3022060	368.085	3056578	0.35	2416	None	HiFi
goat-flye.maxbin.074.contigs	93.41	0.16	Gradient Boost (General Model)	11	0.874	2136141	358.838	2968347	0.55	2412	None	HiFi
goat-flye.maxbin.075.contigs	99.84	0.98	Gradient Boost (General Model)	11	0.936	2736024	365.015	2810860	0.57	2407	None	HiFi
goat-flye.maxbin.080.contigs	95.67	0.32	Gradient Boost (General Model)	11	0.894	945524	305.66	952534	0.36	930	None	HiFi
goat-flye.maxbin.085.contigs	93.39	1.54	Gradient Boost (General Model)	11	0.934	2006595	306.288	2542265	0.46	2590	None	HiFi
goat-flye.maxbin.090.contigs	94.05	5.41	Gradient Boost (General Model)	11	0.876	268424	318.898	4336508	0.48	3981	None	HiFi
goat-flye.maxbin.109.contigs	97.97	0.05	Neural Network (Specific Model)	11	0.918	422890	314.334	639829	0.51	625	None	HiFi
goat-flye.maxbin.110.contigs	91.15	7.04	Gradient Boost (General Model)	11	0.892	744248	282.899	841618	0.45	887	None	HiFi
goat-flye.maxbin.126.contigs	92.87	0.03	Gradient Boost (General Model)	11	0.739	750954	288.11	1040372	0.27	891	None	HiFi
goat-flye.maxbin.130.contigs	90.68	2.1	Gradient Boost (General Model)	11	0.9	307829	324.681	2691244	0.45	2493	None	HiFi
goat-flye.maxbin.179.contigs	73.49	0.47	Gradient Boost (General Model)	11	0.894	50604	324.058	788647	0.33	727	None	HiFi
goat-flye.metabat2.022_sub.contigs	99.5	0.52	Gradient Boost (General Model)	11	0.921	1809364	344.386	3010275	0.49	2694	None	HiFi
goat-flye.metabat2.025.contigs	98.93	0.03	Gradient Boost (General Model)	11	0.938	2083888	370.372	2083888	0.47	1765	None	HiFi
goat-flye.metabat2.059.contigs	97.61	0.09	Gradient Boost (General Model)	11	0.937	1790118	372.794	2251296	0.53	1889	None	HiFi
goat-flye.metabat2.061.contigs	85.62	1.01	Neural Network (Specific Model)	11	0.9	609375	320.075	3197655	0.47	3008	None	HiFi
goat-flye.metabat2.073.contigs	87.67	8.38	Neural Network (Specific Model)	11	0.922	344731	344.454	3186934	0.49	2848	None	HiFi
goat-flye.metabat2.086.contigs	99.96	0.81	Neural Network (Specific Model)	11	0.922	790828	367.396	4254734	0.48	3567	None	HiFi
goat-flye.metabat2.090.contigs	89.61	0.82	Gradient Boost (General Model)	11	0.923	415500	333.72	1465184	0.36	1353	None	HiFi
goat-flye.metabat2.095.contigs	82.98	0.24	Neural Network (Specific Model)	11	0.918	2929850	365.307	3242889	0.5	2720	None	HiFi
goat-flye.metabat2.107.contigs	87.34	1.18	Gradient Boost (General Model)	11	0.899	196331	265.383	926986	0.29	1051	None	HiFi
goat-flye.metabat2.108.contigs	99.49	0.3	Gradient Boost (General Model)	11	0.911	1452772	355.2	2629500	0.53	2252	None	HiFi
goat-flye.metabat2.119.contigs	97.79	0.2	Neural Network (Specific Model)	11	0.918	632535	315.164	632535	0.47	616	None	HiFi
goat-flye.metabat2.128.contigs	95.49	4.84	Gradient Boost (General Model)	11	0.89	1538399	314.781	2721979	0.6	2571	None	HiFi
goat-flye.metabat2.138.contigs	88.5	0.36	Neural Network (Specific Model)	11	0.906	231771	365.727	4191879	0.48	3469	None	HiFi
goat-flye.metabat2.143.contigs	75.2	3.59	Gradient Boost (General Model)	11	0.86	164813	290.752	2654834	0.54	2624	None	HiFi
goat-flye.metabat2.163.contigs	77.96	2.63	Neural Network (Specific Model)	11	0.916	344867	337.325	3107423	0.46	2819	None	HiFi
goat-flye.metabat2.182.contigs	65.36	0.09	Gradient Boost (General Model)	11	0.851	126270	266.885	1584865	0.54	1690	None	HiFi
goat-flye.metabat2.207.contigs	71.49	5.21	Gradient Boost (General Model)	11	0.907	492639	295.692	2695256	0.42	2764	None	HiFi
goat-flye.metabat2.209.contigs	78.35	1.63	Gradient Boost (General Model)	11	0.897	113924	336.389	2115505	0.5	1884	None	HiFi
goat-flye.metabat2.227.contigs	92.79	0.79	Gradient Boost (General Model)	11	0.917	180616	342.575	2845846	0.51	2547	None	HiFi
goat-flye.metabat2.259.contigs	82.77	0.65	Gradient Boost (General Model)	11	0.941	79734	311.264	1064601	0.47	1076	None	HiFi
goat-flye.metabat2.266.contigs	78.93	2.26	Gradient Boost (General Model)	11	0.87	139673	298.01	2673032	0.47	2610	None	HiFi
goat-flye.metabat2.304.contigs	82.96	0.17	Gradient Boost (General Model)	11	0.915	1385968	329.406	1668374	0.44	1548	None	HiFi
goat-flye.metabat2.319.contigs	54.06	0.09	Neural Network (Specific Model)	11	0.878	249546	408.211	2295619	0.53	1648	None	HiFi
goat-flye.metabat2.334.contigs	69.63	5.72	Gradient Boost (General Model)	11	0.87	94078	282.339	2387227	0.53	2463	None	HiFi
goat-flye.metabat2.345.contigs	87.59	3.29	Neural Network (Specific Model)	4	0.888	292008	345.108	1399152	0.31	1201	None	HiFi
goat-flye.metabat2.348.contigs	79.17	1.97	Gradient Boost (General Model)	11	0.902	80910	325.541	2840770	0.53	2632	None	HiFi
goat-flye.metabat2.366.contigs	90.46	0.27	Neural Network (Specific Model)	11	0.885	1073590	370.77	3662412	0.51	2918	None	HiFi
goat-flye.metabat2.373.contigs	73.9	0.25	Neural Network (Specific Model)	11	0.936	99969	322.912	1683554	0.49	1630	None	HiFi
goat-flye.metabat2.378.contigs	66.99	0.46	Gradient Boost (General Model)	11	0.874	478531	325.804	2259010	0.57	2024	None	HiFi
goat-flye.metabat2.388_sub.contigs	64.19	1.71	Neural Network (Specific Model)	11	0.922	167347	349.249	2222559	0.45	1962	None	HiFi
goat-flye.metabat2.391.contigs	96.32	6.79	Gradient Boost (General Model)	11	0.881	3180702	317.127	4554574	0.57	4227	None	HiFi
goat-flye.metabat2.396.contigs	63.95	2.71	Gradient Boost (General Model)	11	0.839	183964	272.494	2878728	0.58	2964	None	HiFi
goat-flye.metabat2.402.contigs	96.75	9.51	Gradient Boost (General Model)	11	0.902	457897	304.418	2569440	0.57	2545	None	HiFi
goat-flye.metabat2.418.contigs	98.36	7.21	Gradient Boost (General Model)	11	0.896	3425952	357.694	4172795	0.45	3490	None	HiFi
goat-flye.metabat2.425.contigs	73.29	0.96	Gradient Boost (General Model)	11	0.857	87107	306.19	2207257	0.51	2066	None	HiFi
goat-flye.metabat2.447.contigs	69.28	1.01	Gradient Boost (General Model)	11	0.857	75455	258.677	1315903	0.56	1458	None	HiFi
goat-flye.metabat2.451.contigs	79.29	0.51	Gradient Boost (General Model)	11	0.884	1579764	311.52	1579764	0.57	1497	None	HiFi
goat-flye.metabat2.461.contigs	93.37	0.05	Gradient Boost (General Model)	11	0.894	329492	338.672	2707289	0.5	2387	None	HiFi
goat-flye.metabat2.464.contigs	64.91	0	Neural Network (Specific Model)	11	0.902	349511	326.929	2305493	0.46	2127	None	HiFi
goat-flye.metabat2.482.contigs	95.34	0.27	Neural Network (Specific Model)	11	0.898	1173009	369.589	4373445	0.46	3546	None	HiFi
goat-flye.metabat2.491.contigs	78.06	0.11	Gradient Boost (General Model)	11	0.922	204847	328.041	1559498	0.44	1466	None	HiFi
goat-flye.metabat2.499.contigs	74.11	0.21	Gradient Boost (General Model)	11	0.904	92271	295.71	1432452	0.5	1464	None	HiFi
goat-flye.metabat2.506.contigs	99.16	0.78	Neural Network (Specific Model)	11	0.894	3640849	363.611	4282491	0.5	3515	None	HiFi
goat-flye.metabat2.511.contigs	74.9	0.83	Neural Network (Specific Model)	11	0.886	1076700	360.435	4133530	0.52	3394	None	HiFi
goat-flye.metabat2.512.contigs	94.92	0.18	Gradient Boost (General Model)	11	0.926	830495	337.78	1229567	0.34	1125	None	HiFi
goat-flye.metabat2.521.contigs	91.79	0.17	Neural Network (Specific Model)	11	0.905	698401	375.058	3448908	0.46	2779	None	HiFi
goat-flye.metabat2.526.contigs	82.81	0.18	Gradient Boost (General Model)	11	0.917	1237549	334.639	1893537	0.48	1735	None	HiFi
goat-flye.metabat2.532.contigs	55.88	2.18	Gradient Boost (General Model)	11	0.838	756528	209.886	2601608	0.52	3488	None	HiFi
goat-hifi.concoct.006.contigs	61.82	3.33	Gradient Boost (General Model)	11	0.885	27798	231.175	2293122	0.42	2946	None	HiFi
goat-hifi.concoct.168_sub.contigs	99.87	1.15	Gradient Boost (General Model)	11	0.869	1982029	351.449	2636365	0.53	2175	None	HiFi
goat-hifi.maxbin.016.contigs	99.28	2.75	Gradient Boost (General Model)	11	0.926	1812705	339.633	2968560	0.44	2703	None	HiFi
goat-hifi.maxbin.018.contigs	92.84	4.49	Gradient Boost (General Model)	11	0.851	1310333	403.688	4965540	0.49	3495	None	HiFi
goat-hifi.maxbin.023.contigs	97.54	0.6	Gradient Boost (General Model)	11	0.926	943150	312.424	1259392	0.36	1246	None	HiFi
goat-hifi.maxbin.025.contigs	98.89	3.75	Neural Network (Specific Model)	4	0.895	1364052	308.304	1523355	0.3	1477	None	HiFi
goat-hifi.maxbin.028.contigs	92.78	4.28	Gradient Boost (General Model)	11	0.914	2383783	309.968	2628702	0.42	2590	None	HiFi
goat-hifi.maxbin.029.contigs	84.79	0.03	Neural Network (Specific Model)	4	0.886	470680	299.364	477555	0.26	473	None	HiFi
goat-hifi.maxbin.031.contigs	99.37	0.58	Gradient Boost (General Model)	11	0.926	2626787	359.317	3216063	0.55	2767	None	HiFi
goat-hifi.maxbin.036.contigs	86.04	0.93	Neural Network (Specific Model)	4	0.928	586226	310.87	586226	0.28	585	None	HiFi
goat-hifi.maxbin.042.contigs	98	6.49	Gradient Boost (General Model)	11	0.898	3464364	360.3	3817970	0.45	3179	None	HiFi
goat-hifi.maxbin.046.contigs	87.39	4.8	Gradient Boost (General Model)	11	0.861	489426	401.896	4727779	0.49	3380	None	HiFi
goat-hifi.maxbin.058.contigs	88.39	0.44	Gradient Boost (General Model)	11	0.938	2072378	314.464	2072378	0.46	2065	None	HiFi
goat-hifi.maxbin.062.contigs	97.29	0.37	Neural Network (Specific Model)	11	0.916	632540	308.384	652339	0.47	648	None	HiFi
goat-hifi.maxbin.069.contigs	97.72	3.16	Gradient Boost (General Model)	11	0.911	1843650	309.144	2646151	0.54	2605	None	HiFi
goat-hifi.maxbin.070.contigs	98.43	0.22	Gradient Boost (General Model)	11	0.877	2822980	333.511	3320012	0.46	2916	None	HiFi
goat-hifi.maxbin.071.contigs	100	1.47	Neural Network (Specific Model)	11	0.895	2470015	306.596	2998807	0.34	2924	None	HiFi
goat-hifi.maxbin.077.contigs	84.26	0.04	Neural Network (Specific Model)	4	0.894	463466	306.181	463466	0.26	453	None	HiFi
goat-hifi.maxbin.083.contigs	53.27	3.04	Gradient Boost (General Model)	11	0.902	230479	315.566	1388471	0.57	1325	None	HiFi
goat-hifi.maxbin.091.contigs	98.35	3.38	Gradient Boost (General Model)	11	0.917	441760	312.558	683271	0.51	670	None	HiFi
goat-hifi.maxbin.103.contigs	93.99	6.09	Gradient Boost (General Model)	11	0.742	1039334	280.357	1141171	0.27	1009	None	HiFi
goat-hifi.maxbin.124_sub.contigs	75.02	0.6	Neural Network (Specific Model)	11	0.88	114556	281.636	579077	0.43	605	None	HiFi
goat-hifi.maxbin.135_sub.contigs	58.37	7.83	Gradient Boost (General Model)	11	0.868	102604	299	2641165	0.3	2565	None	HiFi
goat-hifi.maxbin.138.contigs	77.64	1.56	Neural Network (Specific Model)	11	0.888	189365	284.871	618756	0.5	645	None	HiFi
goat-hifi.maxbin.144.contigs	86.28	7.47	Gradient Boost (General Model)	11	0.858	96029	264.986	1086833	0.32	1178	None	HiFi
goat-hifi.maxbin.266.contigs	62.95	0.25	Gradient Boost (General Model)	11	0.844	38238	254.523	852359	0.46	948	None	HiFi
goat-hifi.metabat2.001.contigs	70.36	1.81	Gradient Boost (General Model)	11	0.856	45114	243.032	731401	0.39	864	None	HiFi
goat-hifi.metabat2.006.contigs	56.57	2.06	Gradient Boost (General Model)	11	0.814	27989	227.106	1267231	0.4	1523	None	HiFi
goat-hifi.metabat2.047.contigs	67.14	0.89	Gradient Boost (General Model)	11	0.901	649074	336.456	2114275	0.57	1891	None	HiFi
goat-hifi.metabat2.059.contigs	98.93	0.02	Gradient Boost (General Model)	11	0.94	2025320	374.983	2025320	0.47	1697	None	HiFi
goat-hifi.metabat2.061.contigs	56.67	0.56	Gradient Boost (General Model)	11	0.908	358439	292.966	1247341	0.48	1294	None	HiFi
goat-hifi.metabat2.136.contigs	75.16	0.54	Neural Network (Specific Model)	11	0.899	84776	306.332	2295947	0.51	2252	None	HiFi
goat-hifi.metabat2.152.contigs	97.18	0.33	Gradient Boost (General Model)	11	0.863	220370	282.762	852631	0.42	871	None	HiFi
goat-hifi.metabat2.179.contigs	57.35	0	Gradient Boost (General Model)	11	0.911	86875	279.232	882822	0.5	963	None	HiFi
goat-hifi.metabat2.192.contigs	80.09	4.91	Gradient Boost (General Model)	11	0.861	307221	307.159	1055548	0.45	990	None	HiFi
goat-hifi.metabat2.199.contigs	71.71	0.16	Gradient Boost (General Model)	11	0.866	212212	319.548	2329382	0.51	2110	None	HiFi
goat-hifi.metabat2.209.contigs	91.59	2.31	Neural Network (Specific Model)	11	0.907	2437479	380.451	3481860	0.46	2772	None	HiFi
goat-hifi.metabat2.215.contigs	97.63	1.19	Gradient Boost (General Model)	11	0.904	4064614	386.135	4064614	0.51	3176	None	HiFi
goat-hifi.metabat2.246.contigs	93.75	0.53	Gradient Boost (General Model)	11	0.899	1045564	339.786	1532053	0.36	1354	None	HiFi
goat-hifi.metabat2.251.contigs	63.15	0.33	Neural Network (Specific Model)	11	0.887	85070	310.198	3003636	0.53	2873	None	HiFi
goat-hifi.metabat2.260.contigs	96.23	0.1	Neural Network (Specific Model)	11	0.931	657699	312.655	657699	0.46	655	None	HiFi
goat-hifi.metabat2.287.contigs	95.53	4.08	Gradient Boost (General Model)	11	0.891	1296612	322.931	4885024	0.54	4500	None	HiFi
goat-hifi.metabat2.341.contigs	97.31	0.06	Gradient Boost (General Model)	11	0.938	2131701	375.934	2250178	0.53	1874	None	HiFi
goat-hifi.metabat2.359.contigs	73.53	3.12	Gradient Boost (General Model)	11	0.902	31897	252.933	1708228	0.46	2041	None	HiFi
goat-hifi.metabat2.449.contigs	85.44	1.94	Gradient Boost (General Model)	11	0.891	1556975	331.174	3034833	0.57	2728	None	HiFi
goat-hifi.metabat2.459.contigs	79.04	0.43	Neural Network (Specific Model)	11	0.889	110728	313.951	1687556	0.44	1598	None	HiFi
goat-hifi.metabat2.463.contigs	94.79	1.58	Gradient Boost (General Model)	11	0.907	3220453	369.943	3321141	0.47	2718	None	HiFi
goat-hifi.metabat2.472.contigs	51.98	0.08	Gradient Boost (General Model)	11	0.935	132371	329.717	999624	0.49	947	None	HiFi
goat-hifi.metabat2.492.contigs	87.86	1.29	Gradient Boost (General Model)	11	0.881	63499	301.476	2000691	0.34	1954	None	HiFi
goat-hifi.metabat2.493.contigs	87.29	0.24	Gradient Boost (General Model)	11	0.903	276510	306.427	2196559	0.4	2164	None	HiFi
goat-hifi.metabat2.494.contigs	99.14	0.58	Gradient Boost (General Model)	11	0.916	785105	363.023	3264080	0.51	2748	None	HiFi
goat-hifi.metabat2.525.contigs	72.84	0.19	Gradient Boost (General Model)	11	0.875	77652	285.987	1569458	0.53	1605	None	HiFi
goat-hifi.metabat2.545.contigs	91.04	1.49	Gradient Boost (General Model)	11	0.93	1086489	327.968	1679628	0.44	1591	None	HiFi
goat-hifi.metabat2.553.contigs	88.68	2.83	Gradient Boost (General Model)	11	0.913	1996303	307.386	2437778	0.42	2420	None	HiFi
goat-hifi.metabat2.570.contigs	68.6	1.14	Gradient Boost (General Model)	11	0.868	62579	279.412	2308786	0.57	2399	None	HiFi
goat-hifi.metabat2.575.contigs	97.97	0.51	Gradient Boost (General Model)	11	0.934	1541369	378.369	2830971	0.53	2334	None	HiFi
goat-hifi.metabat2.583.contigs	95.92	0.54	Gradient Boost (General Model)	11	0.929	1444231	364.871	2738528	0.53	2329	None	HiFi
goat-hifi.metabat2.586.contigs	82.15	2.27	Gradient Boost (General Model)	11	0.892	229019	322.338	2890506	0.57	2674	None	HiFi
goat-hifi.metabat2.600.contigs	99.21	0.83	Gradient Boost (General Model)	11	0.906	2213981	334.578	2213981	0.5	2001	None	HiFi
goat-hifi.metabat2.609.contigs	55.98	0.86	Gradient Boost (General Model)	11	0.758	26722	227.262	1684008	0.42	1886	None	HiFi
goat-hifi.metabat2.620.contigs	65.12	0.65	Gradient Boost (General Model)	11	0.867	60237	281.165	2169181	0.46	2237	None	HiFi
goat-hifi.metabat2.624.contigs	57.8	0.18	Gradient Boost (General Model)	11	0.889	1111748	350.996	1789718	0.5	1513	None	HiFi
goat-hifi.metabat2.645.contigs	83.01	0.19	Gradient Boost (General Model)	11	0.893	279198	339.499	2135844	0.5	1877	None	HiFi
goat-hifi.metabat2.654_sub.contigs	60.15	1.87	Gradient Boost (General Model)	11	0.868	69692	268.468	1619848	0.46	1752	None	HiFi
goat-hifi.metabat2.666.contigs	69.4	2.27	Gradient Boost (General Model)	11	0.869	49708	261.687	2419253	0.49	2694	None	HiFi
goat-hifi.metabat2.693.contigs	54.94	0.16	Gradient Boost (General Model)	11	0.916	67631	323.363	1416950	0.54	1343	None	HiFi
goat-hifi.metabat2.778.contigs	79.82	0.1	Neural Network (Specific Model)	11	0.887	660872	337.752	2217484	0.51	1947	None	HiFi
goat-hifi.metabat2.802.contigs	55.99	4.14	Neural Network (Specific Model)	11	0.813	53077	274.033	2223493	0.61	2207	None	HiFi
goat-hifi.metabat2.828.contigs	94.02	2.09	Gradient Boost (General Model)	11	0.892	2231297	317.524	2231297	0.58	2093	None	HiFi
goat-hifi.metabat2.836.contigs	77.98	6.6	Gradient Boost (General Model)	11	0.893	34415	262.875	1274076	0.31	1451	None	HiFi
goat-hifi.metabat2.853.contigs	75.75	2.63	Gradient Boost (General Model)	11	0.919	142923	337.903	2187270	0.51	1988	None	HiFi
goat-hifi.metabat2.859.contigs	73.79	0.31	Gradient Boost (General Model)	11	0.88	1992531	358.077	1992531	0.49	1635	None	HiFi
goat-hifi.metabat2.882.contigs	55.61	0.17	Neural Network (Specific Model)	11	0.886	955053	313.03	1696436	0.52	1606	None	HiFi
goat-hifi.metabat2.897.contigs	99.07	0.08	Gradient Boost (General Model)	11	0.892	329456	339.63	2538374	0.5	2228	None	HiFi
goat-hifi.metabat2.898.contigs	92.65	0.08	Gradient Boost (General Model)	11	0.897	1072532	377.994	2632379	0.54	2084	None	HiFi
Bin.102	50.45	0.05	Neural Network (Specific Model)	11	0.867	153650	311.39	1129000	0.35	1050	None	HiFi
Bin.1039	61.3	0.1	Neural Network (Specific Model)	11	0.948	336308	379.622	1809652	0.54	1509	None	HiFi
Bin.1118	75	2.66	Neural Network (Specific Model)	11	0.885	154259	328.296	1736407	0.53	1563	None	HiFi
Bin.1199	55.94	2.62	Gradient Boost (General Model)	11	0.889	105705	336.825	1861660	0.44	1642	None	HiFi
Bin.1344	57.85	0.61	Neural Network (Specific Model)	11	0.898	278066	413.181	1962332	0.5	1423	None	HiFi
Bin.1349	71.19	3.59	Gradient Boost (General Model)	11	0.894	222865	370.279	1965324	0.49	1585	None	HiFi
Bin.1373	72.84	4.49	Gradient Boost (General Model)	11	0.904	253094	336.402	2303545	0.44	2068	None	HiFi
Bin.139	92.21	0.13	Gradient Boost (General Model)	11	0.883	366824	308.363	1721912	0.6	1647	None	HiFi
Bin.1424	56.27	0.5	Neural Network (Specific Model)	11	0.8	57159	281.487	1221318	0.4	1159	None	HiFi
Bin.144	57.92	0.01	Gradient Boost (General Model)	11	0.851	139117	320.122	932934	0.5	828	None	HiFi
Bin.1488	70.29	1.11	Neural Network (Specific Model)	11	0.919	319971	344.67	1600045	0.38	1423	None	HiFi
Bin.1517	63.66	2.83	Neural Network (Specific Model)	11	0.865	151529	368.49	2095367	0.41	1643	None	HiFi
Bin.1544	63.89	2.17	Gradient Boost (General Model)	11	0.897	253371	336.949	1992506	0.51	1771	None	HiFi
Bin.1922	85.11	0.27	Neural Network (Specific Model)	11	0.928	375927	386.062	2413756	0.62	1937	None	HiFi
Bin.1985	54.58	1.77	Neural Network (Specific Model)	11	0.875	88517	357.46	2195918	0.48	1796	None	HiFi
Bin.2080	51.44	5.05	Neural Network (Specific Model)	11	0.904	219860	356.146	1460912	0.48	1239	None	HiFi
Bin.2081	93.03	6.59	Gradient Boost (General Model)	11	0.857	235318	411.047	5010760	0.52	3487	None	HiFi
Bin.2119	57.26	2.01	Gradient Boost (General Model)	11	0.869	89729	323.529	1315055	0.52	1181	None	HiFi
Bin.2132	57.33	7	Gradient Boost (General Model)	11	0.879	121309	337.153	1980559	0.63	1725	None	HiFi
Bin.2149	87.95	2.12	Gradient Boost (General Model)	11	0.929	200992	386.637	1906671	0.57	1530	None	HiFi
Bin.2153	65.01	3.72	Neural Network (Specific Model)	11	0.858	137164	368.174	2629530	0.53	2046	None	HiFi
Bin.2176	55.97	4.41	Gradient Boost (General Model)	11	0.837	71484	313.183	1783174	0.41	1592	None	HiFi
Bin.2305	87.42	0.18	Gradient Boost (General Model)	11	0.912	127805	309.871	829135	0.44	815	None	HiFi
Bin.2317	73.64	2.09	Gradient Boost (General Model)	11	0.871	118843	326.949	1705657	0.52	1517	None	HiFi
Bin.2376	82.31	0.87	Gradient Boost (General Model)	11	0.894	83719	315.779	1510953	0.43	1429	None	HiFi
Bin.2401	61.81	4.23	Neural Network (Specific Model)	11	0.858	61907	309.692	2210450	0.38	2046	None	HiFi
Bin.2416	50.49	0.41	Gradient Boost (General Model)	11	0.876	293550	331.195	1104499	0.4	976	None	HiFi
Bin.2425	64.05	4.04	Neural Network (Specific Model)	11	0.89	107075	339.384	1481933	0.47	1298	None	HiFi
Bin.2533	92.23	0.16	Gradient Boost (General Model)	11	0.878	620216	281.548	949034	0.36	989	None	HiFi
Bin.2845	93.41	2.75	Gradient Boost (General Model)	11	0.742	1010111	278.324	1154573	0.36	1028	None	HiFi
Bin.2856	96.59	8.62	Gradient Boost (General Model)	11	0.9	172399	325.777	3216888	0.5	2970	None	HiFi
Bin.2906	55.83	0.77	Neural Network (Specific Model)	11	0.901	118850	321.03	1141960	0.35	1071	None	HiFi
Bin.2917	53.4	0.04	Neural Network (Specific Model)	11	0.88	265440	382.503	1680932	0.53	1291	None	HiFi
Bin.3022	58.13	0.16	Neural Network (Specific Model)	11	0.874	160811	347.687	2549315	0.47	2141	None	HiFi
Bin.3055	71.78	4.08	Neural Network (Specific Model)	11	0.862	198562	349.445	2134193	0.51	1757	None	HiFi
Bin.3348	79	0.7	Neural Network (Specific Model)	11	0.9	566617	348.148	1742224	0.4	1504	None	HiFi
Bin.3418	78.12	1.66	Gradient Boost (General Model)	11	0.875	84980	319.243	1973834	0.44	1807	None	HiFi
Bin.347	60.39	0.23	Neural Network (Specific Model)	11	0.895	175762	362.994	1490046	0.57	1227	None	HiFi
Bin.3496	89.19	8.88	Gradient Boost (General Model)	11	0.896	139622	341.625	2447263	0.45	2144	None	HiFi
Bin.3509	65.12	2.19	Neural Network (Specific Model)	11	0.92	242034	366.584	1684913	0.54	1412	None	HiFi
Bin.3539	84.66	9	Gradient Boost (General Model)	11	0.933	229464	383.638	2280694	0.57	1851	None	HiFi
Bin.3745	98.72	0.25	Gradient Boost (General Model)	11	0.903	582330	329.872	826269	0.44	755	None	HiFi
Bin.3899	69.09	3.73	Gradient Boost (General Model)	11	0.911	1146223	337.33	1563466	0.48	1410	None	HiFi
Bin.3916	70.44	6.4	Gradient Boost (General Model)	11	0.85	55038	288.765	1288961	0.38	1268	None	HiFi
Bin.3956	67.75	8.96	Gradient Boost (General Model)	11	0.913	132111	358.575	2433378	0.44	2070	None	HiFi
Bin.3957	63.19	7.64	Neural Network (Specific Model)	11	0.867	69504	301.394	2356385	0.41	2264	None	HiFi
Bin.396	80.22	0.39	Neural Network (Specific Model)	11	0.878	288817	329.515	2477121	0.49	2204	None	HiFi
Bin.3961	83.08	0.3	Gradient Boost (General Model)	11	0.903	613554	340.814	2610881	0.51	2311	None	HiFi
Bin.3977	63.53	0.04	Gradient Boost (General Model)	11	0.936	181415	376.467	1487014	0.54	1236	None	HiFi
Bin.402	57.3	1.23	Gradient Boost (General Model)	11	0.874	185440	327.986	1186627	0.63	1056	None	HiFi
Bin.4032	94.15	1.45	Gradient Boost (General Model)	11	0.864	435711	287.404	1286152	0.3	1291	None	HiFi
Bin.404	79.2	0.24	Gradient Boost (General Model)	11	0.9	298164	372.998	1509097	0.59	1215	None	HiFi
Bin.4210	64.78	0.4	Gradient Boost (General Model)	11	0.891	247966	362.036	2074533	0.61	1704	None	HiFi
Bin.4268	61.15	0.77	Gradient Boost (General Model)	11	0.891	146899	346.217	1515839	0.52	1304	None	HiFi
Bin.4366	97.9	0.34	Gradient Boost (General Model)	11	0.909	312219	324.655	1992112	0.5	1863	None	HiFi
Bin.615	99.62	0.38	Neural Network (Specific Model)	11	0.905	534229	359.02	2611508	0.45	2198	None	HiFi
Bin.691	63.3	3.32	Gradient Boost (General Model)	11	0.907	62056	356.549	836937	0.28	711	None	HiFi
Bin.708	67.4	4.06	Gradient Boost (General Model)	11	0.886	239145	334.704	1969849	0.44	1741	None	HiFi
Bin.86	57.12	0.13	Neural Network (Specific Model)	11	0.849	134712	353.726	1818994	0.55	1458	None	HiFi
dairy-flye.maxbin.044.contigs	98	0.62	Gradient Boost (General Model)	11	0.869	810417	257.938	1036841	0.42	1168	None	HiFi
dairy-flye.maxbin.118.contigs	71.86	4.72	Gradient Boost (General Model)	11	0.827	73956	252.163	4162573	0.53	4574	None	HiFi
dairy-flye.metabat2.067.contigs	89.94	3.19	Gradient Boost (General Model)	11	0.892	1841274	277.071	3145749	0.46	3389	None	HiFi
dairy-flye.metabat2.085.contigs	56.27	1.36	Neural Network (Specific Model)	11	0.882	406078	303.9	2235983	0.53	2174	None	HiFi
dairy-flye.metabat2.108.contigs	81.5	0.73	Gradient Boost (General Model)	11	0.852	2473485	285.159	3303256	0.5	3304	None	HiFi
dairy-flye.metabat2.155.contigs	89.77	1.18	Gradient Boost (General Model)	11	0.878	1601520	310.657	2723323	0.38	2572	None	HiFi
dairy-flye.metabat2.210.contigs	87.03	4.68	Gradient Boost (General Model)	11	0.823	353050	244.049	1247893	0.43	1409	None	HiFi
dairy-flye.metabat2.211.contigs	67.68	0.44	Gradient Boost (General Model)	11	0.901	117737	322.12	1064074	0.49	995	None	HiFi
dairy-flye.metabat2.212.contigs	56.45	2.24	Gradient Boost (General Model)	11	0.817	99315	195.511	1039832	0.29	1457	None	HiFi
dairy-flye.metabat2.220.contigs	94.36	0.52	Gradient Boost (General Model)	11	0.914	456676	298.331	1701207	0.5	1743	None	HiFi
dairy-flye.metabat2.251.contigs	50.63	0.18	Neural Network (Specific Model)	11	0.904	117889	325.81	1685858	0.46	1563	None	HiFi
dairy-flye.metabat2.280.contigs	88.97	3.27	Gradient Boost (General Model)	11	0.857	200462	276.424	1972530	0.58	2045	None	HiFi
dairy-flye.metabat2.343.contigs	83.62	4.48	Neural Network (Specific Model)	11	0.917	129399	340.3	2823972	0.48	2544	None	HiFi
dairy-flye.metabat2.366.contigs	71.21	2.59	Gradient Boost (General Model)	11	0.907	129807	297.025	2243647	0.54	2294	None	HiFi
dairy-flye.metabat2.444.contigs	55.68	1.96	Gradient Boost (General Model)	11	0.867	75754	269.561	1893405	0.58	2038	None	HiFi
dairy-flye.metabat2.512.contigs	78.88	3.98	Neural Network (Specific Model)	11	0.91	135560	320.254	2990274	0.49	2845	None	HiFi
dairy-flye.metabat2.514.contigs	95.39	3.92	Gradient Boost (General Model)	11	0.895	463977	312.869	1775911	0.52	1698	None	HiFi
dairy-flye.metabat2.574.contigs	67.12	6.18	Gradient Boost (General Model)	11	0.881	95955	239.078	1798562	0.46	2227	None	HiFi
dairy-flye.metabat2.589.contigs	70.94	2.28	Gradient Boost (General Model)	11	0.878	170632	262.332	2117752	0.46	2377	None	HiFi
dairy-hifi.maxbin.064.contigs	97.22	0.75	Gradient Boost (General Model)	11	0.912	994355	312.855	994355	0.38	967	None	HiFi
dairy-hifi.metabat2.1190.contigs	53.54	2.87	Gradient Boost (General Model)	11	0.862	36781	267.177	1457282	0.52	1574	None	HiFi
dairy-hifi.metabat2.1416.contigs	70.26	8.13	Gradient Boost (General Model)	11	0.902	89149	322.449	2409044	0.46	2254	None	HiFi
dairy-hifi.metabat2.361.contigs	99.94	0.7	Neural Network (Specific Model)	11	0.903	1748110	353.27	3634232	0.53	3100	None	HiFi
dairy-hifi.metabat2.444.contigs	86.66	2.94	Gradient Boost (General Model)	11	0.891	218179	360.459	3348609	0.58	2766	None	HiFi
dairy-hifi.metabat2.564.contigs	65.02	4.35	Gradient Boost (General Model)	11	0.886	132944	326.788	2411110	0.46	2185	None	HiFi
dairy-hifi.metabat2.612_sub.contigs	75.61	7.19	Gradient Boost (General Model)	11	0.875	52780	223.37	852921	0.41	1120	None	HiFi
dairy-hifi.metabat2.640.contigs	57.09	0.37	Neural Network (Specific Model)	11	0.811	49278	243.607	1480800	0.46	1652	None	HiFi
dairy-hifi.metabat2.790.contigs	70.18	2.62	Gradient Boost (General Model)	11	0.913	149421	341.213	2218986	0.58	1985	None	HiFi
goat-flye.concoct.024_sub.contigs	77.53	4.76	Neural Network (Specific Model)	4	0.858	316058	294.892	568771	0.26	554	None	HiFi
goat-flye.concoct.039_sub.contigs	90.14	3.28	Gradient Boost (General Model)	11	0.887	4684166	433.429	5062117	0.55	3453	None	HiFi
goat-flye.concoct.046_sub.contigs	75.77	3.12	Gradient Boost (General Model)	11	0.875	52672	289.683	1483507	0.53	1500	None	HiFi
goat-flye.concoct.063.contigs	61.57	4.39	Neural Network (Specific Model)	11	0.834	58242	269.857	4917117	0.57	5087	None	HiFi
goat-flye.maxbin.002.contigs	96.08	3.45	Neural Network (Specific Model)	4	0.915	699198	311.059	728119	0.27	716	None	HiFi
goat-flye.maxbin.004.contigs	99.84	0.48	Gradient Boost (General Model)	11	0.923	2751202	345.983	3146383	0.44	2804	None	HiFi
goat-flye.maxbin.008_sub.contigs	73.46	8.09	Neural Network (Specific Model)	11	0.912	2899872	322.688	3562551	0.48	3363	None	HiFi
goat-flye.maxbin.014.contigs	97.1	0.7	Gradient Boost (General Model)	11	0.897	2746374	332.273	2746374	0.59	2476	None	HiFi
goat-flye.maxbin.015.contigs	92.92	0.35	Gradient Boost (General Model)	11	0.876	900667	385.035	3532760	0.65	2682	None	HiFi
goat-flye.maxbin.020.contigs	96.73	0.8	Gradient Boost (General Model)	11	0.88	3559017	350.729	4027006	0.57	3374	None	HiFi
goat-flye.maxbin.025.contigs	99.65	0.1	Gradient Boost (General Model)	11	0.924	2765818	371.016	2765818	0.49	2298	None	HiFi
goat-flye.maxbin.026.contigs	98.98	0.13	Neural Network (Specific Model)	11	0.927	653594	313.823	675312	0.46	667	None	HiFi
goat-flye.maxbin.027.contigs	97.35	2.13	Gradient Boost (General Model)	11	0.869	3022524	332.595	3022524	0.59	2636	None	HiFi
goat-flye.maxbin.029.contigs	91.65	1.96	Gradient Boost (General Model)	11	0.85	1795078	411.631	4883170	0.49	3365	None	HiFi
goat-flye.maxbin.034.contigs	97.9	1.95	Gradient Boost (General Model)	11	0.886	753702	306.827	844381	0.41	814	None	HiFi
goat-flye.maxbin.036.contigs	94.38	2.93	Gradient Boost (General Model)	11	0.914	1397433	341.73	2689215	0.51	2403	None	HiFi
goat-flye.maxbin.038.contigs	98.55	0.34	Neural Network (Specific Model)	11	0.913	830753	292.698	1055725	0.39	1101	None	HiFi
goat-flye.maxbin.041.contigs	92.88	3.48	Gradient Boost (General Model)	11	0.914	2440224	313.354	2650427	0.42	2582	None	HiFi
goat-flye.maxbin.046.contigs	99.37	1.41	Gradient Boost (General Model)	11	0.905	1543866	327.601	2366875	0.49	2183	None	HiFi
goat-flye.maxbin.047.contigs	100	3.72	Gradient Boost (General Model)	11	0.875	1702766	287.201	2103451	0.27	2141	None	HiFi
goat-flye.maxbin.060.contigs	98.3	0.82	Gradient Boost (General Model)	11	0.933	1522467	373.813	2925998	0.53	2439	None	HiFi
goat-flye.maxbin.062.contigs	92.04	3.63	Gradient Boost (General Model)	11	0.86	1027057	398.609	5136538	0.49	3700	None	HiFi
goat-flye.maxbin.063.contigs	95.66	3.84	Gradient Boost (General Model)	11	0.925	1034869	314.499	2526990	0.44	2484	None	HiFi
goat-flye.maxbin.064.contigs	93.78	0	Neural Network (Specific Model)	4	0.91	632541	313.035	757879	0.28	736	None	HiFi
goat-flye.maxbin.067.contigs	90.93	5.04	Gradient Boost (General Model)	11	0.922	2366915	303.13	2656037	0.52	2704	None	HiFi
goat-flye.maxbin.068.contigs	92.83	4.52	Gradient Boost (General Model)	11	0.922	1332673	300.491	1712294	0.27	1755	None	HiFi
goat-flye.maxbin.069.contigs	99.92	3.49	Neural Network (Specific Model)	11	0.854	477041	326.179	3748283	0.3	3277	None	HiFi
goat-flye.maxbin.081.contigs	97.58	2.3	Gradient Boost (General Model)	11	0.911	2291497	323.712	2426554	0.54	2281	None	HiFi
goat-flye.maxbin.093.contigs	93.33	2.52	Gradient Boost (General Model)	11	0.911	944703	334.835	3129322	0.47	2846	None	HiFi
goat-flye.maxbin.094.contigs	96.11	0.05	Gradient Boost (General Model)	11	0.925	1763107	361.169	1763107	0.32	1507	None	HiFi
goat-flye.maxbin.101.contigs	95.62	3.25	Gradient Boost (General Model)	11	0.899	765078	303.228	945620	0.47	938	None	HiFi
goat-flye.maxbin.117.contigs	91.57	2.54	Gradient Boost (General Model)	11	0.923	1086487	311.39	2123833	0.44	2102	None	HiFi
goat-flye.maxbin.118.contigs	95.44	1.86	Gradient Boost (General Model)	11	0.87	402602	317.992	1219006	0.45	1114	None	HiFi
goat-flye.maxbin.129.contigs	78.75	2.14	Gradient Boost (General Model)	4	0.894	776646	339.749	908149	0.29	797	None	HiFi
goat-flye.maxbin.190.contigs	62.55	0.33	Neural Network (Specific Model)	11	0.873	94026	285.259	1257777	0.44	1287	None	HiFi
goat-flye.maxbin.203_sub.contigs	61.81	3.35	Neural Network (Specific Model)	11	0.873	279745	271.898	530028	0.43	570	None	HiFi
goat-flye.maxbin.222.contigs	72.29	0.66	Gradient Boost (General Model)	11	0.828	46473	305.712	2539941	0.51	2299	None	HiFi
goat-flye.maxbin.233_sub.contigs	52.04	0.18	Neural Network (Specific Model)	11	0.879	48733	311.747	1305470	0.34	1230	None	HiFi
goat-flye.maxbin.237.contigs	52.84	0.01	Neural Network (Specific Model)	11	0.829	45954	245.194	1264267	0.3	1430	None	HiFi
goat-flye.metabat2.001.contigs	97.63	1.18	Gradient Boost (General Model)	11	0.903	4053886	385.265	4053886	0.51	3172	None	HiFi
goat-flye.metabat2.010.contigs	97.42	2.02	Gradient Boost (General Model)	11	0.907	2688692	344.879	3243802	0.51	2851	None	HiFi
goat-flye.metabat2.013.contigs	99.97	1.04	Gradient Boost (General Model)	11	0.895	1214154	382.056	2308096	0.54	1804	None	HiFi
goat-flye.metabat2.056.contigs	77.37	3.12	Gradient Boost (General Model)	11	0.893	181623	301.24	3479946	0.48	3447	None	HiFi
goat-flye.metabat2.062.contigs	95.98	0.17	Gradient Boost (General Model)	11	0.893	165673	316.822	2205626	0.43	2077	None	HiFi
goat-flye.metabat2.077.contigs	85.65	3.8	Neural Network (Specific Model)	11	0.916	407117	335.173	3278174	0.47	2994	None	HiFi
goat-flye.metabat2.080.contigs	96.62	1.5	Gradient Boost (General Model)	11	0.93	1465188	330.244	2664843	0.47	2509	None	HiFi
goat-flye.metabat2.083.contigs	94.79	0.15	Gradient Boost (General Model)	11	0.907	3219940	370.114	3227446	0.47	2642	None	HiFi
goat-flye.metabat2.089.contigs	69.88	0.31	Gradient Boost (General Model)	11	0.849	549031	287.216	2009130	0.6	1985	None	HiFi
goat-flye.metabat2.100.contigs	97.13	0.18	Gradient Boost (General Model)	11	0.891	1544870	355.108	2727257	0.54	2284	None	HiFi
goat-flye.metabat2.109.contigs	91.22	0.85	Neural Network (Specific Model)	11	0.908	874050	338.965	3364663	0.46	3008	None	HiFi
goat-flye.metabat2.140.contigs	91.12	0.26	Gradient Boost (General Model)	11	0.879	203657	281.594	2545380	0.41	2657	None	HiFi
goat-flye.metabat2.144.contigs	50.22	2.49	Gradient Boost (General Model)	11	0.88	49255	300.957	1744576	0.46	1707	None	HiFi
goat-flye.metabat2.147.contigs	95.61	0.5	Gradient Boost (General Model)	11	0.92	197791	279.399	1801648	0.48	1987	None	HiFi
goat-flye.metabat2.161.contigs	93.75	0.54	Gradient Boost (General Model)	11	0.898	1038661	335.298	1490898	0.36	1334	None	HiFi
goat-flye.metabat2.173_sub.contigs	57.62	1.6	Gradient Boost (General Model)	11	0.808	60887	266.847	1174419	0.34	1190	None	HiFi
goat-flye.metabat2.180.contigs	84.82	4.81	Gradient Boost (General Model)	11	0.909	171371	312.246	1820952	0.36	1771	None	HiFi
goat-flye.metabat2.203.contigs	72.07	3.11	Gradient Boost (General Model)	11	0.816	70791	276.793	4565287	0.52	4505	None	HiFi
goat-flye.metabat2.212.contigs	96.12	1.48	Gradient Boost (General Model)	11	0.888	1939901	341.901	3126804	0.56	2711	None	HiFi
goat-flye.metabat2.276.contigs	90.65	1.81	Gradient Boost (General Model)	11	0.894	289760	302.237	1712776	0.52	1694	None	HiFi
goat-flye.metabat2.300.contigs	90.4	7.69	Neural Network (Specific Model)	11	0.917	354967	342.119	3481323	0.48	3119	None	HiFi
goat-flye.metabat2.306.contigs	63.5	2.77	Gradient Boost (General Model)	11	0.87	57616	278.937	2102522	0.54	2195	None	HiFi
goat-flye.metabat2.321.contigs	83.91	1.96	Gradient Boost (General Model)	11	0.896	132197	314.953	1621631	0.32	1542	None	HiFi
goat-flye.metabat2.337.contigs	81.58	3.64	Gradient Boost (General Model)	11	0.853	70018	247.957	2432487	0.59	2803	None	HiFi
goat-flye.metabat2.357.contigs	51.31	1.65	Gradient Boost (General Model)	11	0.907	91553	304.668	1353295	0.52	1349	None	HiFi
goat-flye.metabat2.374.contigs	79.11	3.07	Gradient Boost (General Model)	11	0.862	84256	276.875	2723478	0.58	2837	None	HiFi
goat-flye.metabat2.419.contigs	97.21	4.78	Gradient Boost (General Model)	11	0.924	190903	302.925	2146385	0.39	2192	None	HiFi
goat-flye.metabat2.454.contigs	78.19	0.55	Gradient Boost (General Model)	11	0.878	278428	324.468	1910134	0.57	1726	None	HiFi
goat-hifi.concoct.029_sub.contigs	88.64	7.56	Gradient Boost (General Model)	11	0.883	210059	328.46	2888494	0.58	2594	None	HiFi
goat-hifi.concoct.114.contigs	57.1	4.44	Neural Network (Specific Model)	11	0.878	26949	255.924	2431499	0.46	2798	None	HiFi
goat-hifi.concoct.145.contigs	77.71	2.23	Gradient Boost (General Model)	11	0.877	76060	266.82	2010587	0.49	2214	None	HiFi
goat-hifi.maxbin.003.contigs	79.45	0.35	Gradient Boost (General Model)	11	0.926	499217	354.704	2416313	0.49	2111	None	HiFi
goat-hifi.maxbin.013.contigs	93.36	0.62	Gradient Boost (General Model)	11	0.883	872288	351.578	3545210	0.57	2974	None	HiFi
goat-hifi.maxbin.020.contigs	97.77	0.89	Gradient Boost (General Model)	11	0.868	1053178	319.241	2424578	0.6	2202	None	HiFi
goat-hifi.maxbin.035.contigs	100	3.25	Gradient Boost (General Model)	11	0.875	1481804	288.551	2203543	0.27	2234	None	HiFi
goat-hifi.maxbin.040_sub.contigs	80.66	1.67	Gradient Boost (General Model)	11	0.902	938501	323.382	2134421	0.61	1988	None	HiFi
goat-hifi.maxbin.053.contigs	98.64	0.2	Neural Network (Specific Model)	11	0.906	802556	316.356	830014	0.52	794	None	HiFi
goat-hifi.maxbin.054_sub.contigs	95.88	0.32	Gradient Boost (General Model)	11	0.919	1591738	329.312	1673030	0.44	1559	None	HiFi
goat-hifi.maxbin.060.contigs	100	0.82	Gradient Boost (General Model)	11	0.936	2830604	364.256	2840595	0.57	2439	None	HiFi
goat-hifi.maxbin.068.contigs	98.27	0.21	Gradient Boost (General Model)	11	0.912	2293895	341.807	2418858	0.45	2154	None	HiFi
goat-hifi.maxbin.078.contigs	77.49	0.12	Gradient Boost (General Model)	11	0.912	1082648	308.258	1164992	0.46	1152	None	HiFi
goat-hifi.maxbin.080.contigs	69.89	2.73	Gradient Boost (General Model)	11	0.929	614952	364.489	2060656	0.55	1755	None	HiFi
goat-hifi.maxbin.081.contigs	91.9	3.61	Gradient Boost (General Model)	11	0.872	585700	364.901	3410975	0.56	2721	None	HiFi
goat-hifi.maxbin.089.contigs	100	9.96	Gradient Boost (General Model)	11	0.9	753392	297.776	832935	0.45	842	None	HiFi
goat-hifi.maxbin.105.contigs	83.23	5.29	Gradient Boost (General Model)	11	0.905	324416	287.066	2847688	0.52	2999	None	HiFi
goat-hifi.maxbin.130.contigs	83.08	3.73	Gradient Boost (General Model)	11	0.866	67879	243.489	885217	0.44	1054	None	HiFi
goat-hifi.maxbin.162.contigs	75.1	1.32	Gradient Boost (General Model)	11	0.818	61434	287.873	3024922	0.51	2875	None	HiFi
goat-hifi.maxbin.230.contigs	58.44	2.54	Gradient Boost (General Model)	11	0.875	27246	235.232	1245160	0.47	1555	None	HiFi
goat-hifi.metabat2.058.contigs	73.66	3.54	Gradient Boost (General Model)	11	0.89	53981	257.222	2107948	0.44	2445	None	HiFi
goat-hifi.metabat2.095.contigs	50.31	0.87	Neural Network (Specific Model)	11	0.93	97554	332.179	1157067	0.52	1083	None	HiFi
goat-hifi.metabat2.096.contigs	82.63	0.7	Gradient Boost (General Model)	11	0.91	352396	327.42	1475099	0.36	1369	None	HiFi
goat-hifi.metabat2.117.contigs	79.03	3.13	Gradient Boost (General Model)	11	0.854	64971	256.253	2369133	0.44	2642	None	HiFi
goat-hifi.metabat2.125_sub.contigs	77.99	1.4	Gradient Boost (General Model)	11	0.891	105786	284.81	1260060	0.55	1318	None	HiFi
goat-hifi.metabat2.126.contigs	99.03	2.92	Gradient Boost (General Model)	11	0.888	2058058	345.23	3112198	0.56	2674	None	HiFi
goat-hifi.metabat2.133.contigs	51.58	8.72	Neural Network (Specific Model)	11	0.854	41528	278.772	2615914	0.55	2684	None	HiFi
goat-hifi.metabat2.195.contigs	84.85	0.14	Gradient Boost (General Model)	11	0.879	1949677	359.803	2669902	0.55	2176	None	HiFi
goat-hifi.metabat2.235.contigs	68.6	0.23	Neural Network (Specific Model)	11	0.911	181917	327.853	2583867	0.45	2401	None	HiFi
goat-hifi.metabat2.264.contigs	99.62	0.02	Gradient Boost (General Model)	11	0.918	1521099	361.566	2580891	0.53	2189	None	HiFi
goat-hifi.metabat2.271.contigs	73.64	2.39	Gradient Boost (General Model)	11	0.875	82277	292.293	1511185	0.29	1513	None	HiFi
goat-hifi.metabat2.275.contigs	97.1	0.37	Gradient Boost (General Model)	11	0.922	1994940	352.423	2276660	0.32	1990	None	HiFi
goat-hifi.metabat2.277_sub.contigs	72.77	2.49	Gradient Boost (General Model)	11	0.904	205428	306.407	1970182	0.43	1945	None	HiFi
goat-hifi.metabat2.330.contigs	99.13	0.61	Gradient Boost (General Model)	11	0.899	2952520	347.856	2952520	0.49	2549	None	HiFi
goat-hifi.metabat2.350.contigs	75.64	2.62	Gradient Boost (General Model)	11	0.886	605513	436.008	4179111	0.56	2833	None	HiFi
goat-hifi.metabat2.356.contigs	92.03	0.95	Gradient Boost (General Model)	11	0.926	1200649	302.82	1327890	0.29	1356	None	HiFi
goat-hifi.metabat2.390.contigs	57.96	0.01	Gradient Boost (General Model)	11	0.855	28914	218.506	813553	0.33	1068	None	HiFi
goat-hifi.metabat2.397.contigs	97.58	0.33	Gradient Boost (General Model)	11	0.871	3022048	369.313	3022048	0.35	2378	None	HiFi
goat-hifi.metabat2.403.contigs	72.56	0.83	Gradient Boost (General Model)	11	0.879	1156038	322.232	1864628	0.6	1697	None	HiFi
goat-hifi.metabat2.410.contigs	92.62	0.24	Gradient Boost (General Model)	11	0.923	1290806	345.542	1728728	0.34	1542	None	HiFi
goat-hifi.metabat2.413.contigs	91.33	1.21	Neural Network (Specific Model)	11	0.905	2681883	337.627	3374963	0.46	3020	None	HiFi
goat-hifi.metabat2.416.contigs	64.08	2.32	Gradient Boost (General Model)	11	0.892	101990	292.273	2344789	0.53	2395	None	HiFi
goat-hifi.metabat2.427.contigs	63.28	0.23	Neural Network (Specific Model)	11	0.903	511120	361.163	2855325	0.47	2384	None	HiFi
goat-hifi.metabat2.437.contigs	93.05	0.05	Neural Network (Specific Model)	11	0.885	753702	308.651	753702	0.41	722	None	HiFi
goat-hifi.metabat2.453.contigs	83.03	1.5	Neural Network (Specific Model)	11	0.895	2668142	326.907	3397380	0.43	3109	None	HiFi
goat-hifi.metabat2.461.contigs	96.52	2.36	Gradient Boost (General Model)	11	0.914	1656092	312.799	2716797	0.52	2656	None	HiFi
goat-hifi.metabat2.544_sub.contigs	70.2	9.42	Neural Network (Specific Model)	11	0.912	158085	350.347	3055119	0.49	2655	None	HiFi
goat-hifi.metabat2.547.contigs	98.88	0.9	Gradient Boost (General Model)	11	0.909	3812562	361.442	3812562	0.48	3202	None	HiFi
goat-hifi.metabat2.550.contigs	57	2.58	Gradient Boost (General Model)	11	0.853	34541	259.305	1347698	0.6	1485	None	HiFi
goat-hifi.metabat2.563.contigs	97.43	0.09	Neural Network (Specific Model)	11	0.92	840688	330.477	840688	0.4	782	None	HiFi
goat-hifi.metabat2.566.contigs	55.53	0.2	Gradient Boost (General Model)	11	0.874	71649	372.235	2206946	0.67	1729	None	HiFi
goat-hifi.metabat2.568.contigs	71.73	0.9	Gradient Boost (General Model)	11	0.909	192454	330.426	2054332	0.44	1889	None	HiFi
goat-hifi.metabat2.640.contigs	67.46	0.42	Gradient Boost (General Model)	11	0.897	41718	260.782	1822530	0.42	2100	None	HiFi
goat-hifi.metabat2.670.contigs	83.44	0.18	Gradient Boost (General Model)	11	0.894	223023	314.245	1664796	0.53	1582	None	HiFi
goat-hifi.metabat2.676.contigs	53.96	0.05	Gradient Boost (General Model)	11	0.879	144541	290.299	1184321	0.54	1198	None	HiFi
goat-hifi.metabat2.685.contigs	84.01	0.61	Gradient Boost (General Model)	11	0.924	241332	330.295	1670545	0.44	1564	None	HiFi
goat-hifi.metabat2.701.contigs	96.99	3.69	Gradient Boost (General Model)	11	0.915	1370173	332.701	1624014	0.34	1492	None	HiFi
goat-hifi.metabat2.720.contigs	74.52	1.18	Neural Network (Specific Model)	11	0.933	100011	312.358	1232810	0.47	1233	None	HiFi
goat-hifi.metabat2.724.contigs	97.39	0.1	Gradient Boost (General Model)	11	0.895	1408861	312.153	2440103	0.41	2340	None	HiFi
goat-hifi.metabat2.736.contigs	78.47	1.02	Neural Network (Specific Model)	11	0.89	822004	353.114	4083907	0.52	3435	None	HiFi
goat-hifi.metabat2.753.contigs	94.53	0.05	Gradient Boost (General Model)	11	0.93	1013019	339.102	1265992	0.34	1159	None	HiFi
goat-hifi.metabat2.768.contigs	99.54	6.69	Neural Network (Specific Model)	11	0.873	2794969	383.187	4834771	0.52	3677	None	HiFi
goat-hifi.metabat2.779.contigs	59.98	0.39	Gradient Boost (General Model)	11	0.86	53466	287.198	1269240	0.6	1271	None	HiFi
goat-hifi.metabat2.814.contigs	73.98	0.13	Gradient Boost (General Model)	11	0.693	46590	230.7	1108255	0.29	1116	None	HiFi
goat-hifi.metabat2.843.contigs	67.52	2.62	Gradient Boost (General Model)	11	0.853	39498	270.415	2194252	0.51	2318	None	HiFi
goat-hifi.metabat2.848.contigs	100	0.38	Neural Network (Specific Model)	11	0.899	2340786	325.712	2340786	0.35	2156	None	HiFi
goat-hifi.metabat2.864.contigs	72.56	1.33	Gradient Boost (General Model)	11	0.866	153338	281.375	1622279	0.48	1668	None	HiFi
goat-hifi.metabat2.885.contigs	60.72	8.75	Gradient Boost (General Model)	11	0.884	336527	287.046	3681656	0.46	3793	None	HiFi
goat-hifi.metabat2.900.contigs	100	0.13	Gradient Boost (General Model)	11	0.89	2609499	364.101	2609499	0.51	2128	None	HiFi
Bin.1267	67.78	8.8	Neural Network (Specific Model)	11	0.873	144242	340.183	2083754	0.5	1787	None	HiFi
Bin.1283	78.8	0.86	Gradient Boost (General Model)	11	0.877	212561	338.693	2198032	0.38	1901	None	HiFi
Bin.1310	61.96	1.93	Neural Network (Specific Model)	11	0.862	59281	300.185	1626157	0.48	1562	None	HiFi
Bin.1405	57.97	0	Gradient Boost (General Model)	11	0.908	191736	316.486	459132	0.54	440	None	HiFi
Bin.1443	91.26	4.31	Gradient Boost (General Model)	11	0.916	314534	309.892	1810721	0.46	1787	None	HiFi
Bin.153	96	1.55	Neural Network (Specific Model)	11	0.866	210919	354.799	3283308	0.52	2675	None	HiFi
Bin.1536	75.14	0.18	Gradient Boost (General Model)	11	0.879	277367	313.942	1084533	0.47	1014	None	HiFi
Bin.1539	57.37	0.31	Neural Network (Specific Model)	11	0.935	234655	380.166	1859290	0.56	1527	None	HiFi
Bin.1545	75.44	0.73	Gradient Boost (General Model)	11	0.899	151523	343.011	2207280	0.46	1933	None	HiFi
Bin.1567	85.14	0.29	Gradient Boost (General Model)	11	0.864	317319	376.045	2578876	0.54	1977	None	HiFi
Bin.1653	81.67	1.55	Gradient Boost (General Model)	11	0.881	145274	354.644	2368275	0.42	1965	None	HiFi
Bin.1655	84.68	1.66	Neural Network (Specific Model)	11	0.901	193380	378.533	2809176	0.47	2232	None	HiFi
Bin.1773	63.77	3.11	Gradient Boost (General Model)	11	0.913	229156	363.576	1536867	0.52	1289	None	HiFi
Bin.1933	65.95	0.59	Neural Network (Specific Model)	11	0.916	144525	379.552	2173424	0.48	1753	None	HiFi
Bin.194	57.37	0.51	Neural Network (Specific Model)	11	0.858	134480	339.397	1817361	0.49	1535	None	HiFi
Bin.1958	68.26	1.39	Gradient Boost (General Model)	11	0.913	293458	322.571	963989	0.35	912	None	HiFi
Bin.198	68.56	0.28	Neural Network (Specific Model)	11	0.883	215434	341.502	1441986	0.44	1244	None	HiFi
Bin.2051	68.26	0.08	Gradient Boost (General Model)	11	0.901	471472	329.217	1661517	0.51	1520	None	HiFi
Bin.2190	86.61	1.02	Gradient Boost (General Model)	11	0.934	126457	365.611	2028802	0.61	1730	None	HiFi
Bin.2203	66.81	2.66	Gradient Boost (General Model)	11	0.906	157464	338.078	1021257	0.34	914	None	HiFi
Bin.2270	61.26	3.67	Neural Network (Specific Model)	11	0.904	292147	370.691	2314698	0.38	1885	None	HiFi
Bin.2337	81.77	1.29	Gradient Boost (General Model)	11	0.892	289411	355.031	2184490	0.5	1832	None	HiFi
Bin.2365	87.18	0.04	Neural Network (Specific Model)	4	0.91	142165	313.209	423703	0.26	412	None	HiFi
Bin.2420	57.32	0.44	Neural Network (Specific Model)	11	0.89	170426	326.518	1382950	0.5	1260	None	HiFi
Bin.244	51.99	0.25	Neural Network (Specific Model)	11	0.88	200606	385.287	2125492	0.54	1621	None	HiFi
Bin.2457	62.73	2.33	Gradient Boost (General Model)	11	0.922	125152	326.453	1340600	0.51	1267	None	HiFi
Bin.2511	93.72	0.39	Gradient Boost (General Model)	11	0.901	386423	310.12	1061992	0.28	1030	None	HiFi
Bin.2563	94.89	1.35	Gradient Boost (General Model)	11	0.944	421028	371.528	2354602	0.52	1997	None	HiFi
Bin.2682	68.39	1.72	Gradient Boost (General Model)	11	0.891	320801	338.474	1826542	0.53	1607	None	HiFi
Bin.2703	92.85	0.06	Neural Network (Specific Model)	11	0.903	263767	306.537	1526600	0.34	1502	None	HiFi
Bin.2725	67.17	0.56	Gradient Boost (General Model)	11	0.883	206582	370.941	2021948	0.54	1606	None	HiFi
Bin.2735	79.41	4.06	Gradient Boost (General Model)	11	0.88	546049	316.678	1383803	0.29	1284	None	HiFi
Bin.2819	59.51	5.83	Gradient Boost (General Model)	11	0.917	58200	308.882	1263141	0.48	1255	None	HiFi
Bin.2972	78.6	4.88	Neural Network (Specific Model)	11	0.911	255929	344.28	2266926	0.46	2004	None	HiFi
Bin.2996	61.55	0.63	Neural Network (Specific Model)	11	0.922	153948	332.052	1460931	0.52	1355	None	HiFi
Bin.3003	91.47	0.78	Gradient Boost (General Model)	11	0.906	273383	364.531	2469921	0.4	2049	None	HiFi
Bin.3063	97.21	0.18	Gradient Boost (General Model)	11	0.902	250685	351.545	2450970	0.46	2100	None	HiFi
Bin.3084	58.06	5.48	Gradient Boost (General Model)	11	0.856	91268	330.613	1718317	0.61	1486	None	HiFi
Bin.3086	78.46	0.09	Neural Network (Specific Model)	11	0.88	373649	348.059	2759117	0.46	2329	None	HiFi
Bin.3097	90.65	0.45	Gradient Boost (General Model)	11	0.878	236414	355.354	2159047	0.56	1781	None	HiFi
Bin.3150	90.51	9.27	Gradient Boost (General Model)	11	0.896	342553	362.87	2874068	0.44	2369	None	HiFi
Bin.3233	50.3	5.31	Neural Network (Specific Model)	11	0.887	168125	359.565	2144138	0.49	1766	None	HiFi
Bin.3265	90.2	0.34	Gradient Boost (General Model)	11	0.934	217554	375.734	2096147	0.58	1740	None	HiFi
Bin.3503	95.9	0.11	Gradient Boost (General Model)	11	0.864	364744	385.6	2424353	0.54	1813	None	HiFi
Bin.3531	78.93	4.32	Gradient Boost (General Model)	11	0.902	303037	419.558	3685342	0.56	2642	None	HiFi
Bin.3543	63.01	0.29	Neural Network (Specific Model)	11	0.884	357122	378.249	1658406	0.54	1294	None	HiFi
Bin.3570	68.01	2.84	Gradient Boost (General Model)	11	0.911	312767	356.978	1724129	0.5	1472	None	HiFi
Bin.3623	78.44	0.52	Neural Network (Specific Model)	11	0.887	142675	390.039	2800924	0.5	2126	None	HiFi
Bin.3630	80.49	0.43	Neural Network (Specific Model)	11	0.785	115396	292.286	1587679	0.35	1422	None	HiFi
Bin.3685	71.15	0.22	Gradient Boost (General Model)	11	0.94	238989	389.412	1647579	0.59	1329	None	HiFi
Bin.3746	52.17	0.38	Gradient Boost (General Model)	11	0.933	172071	341.028	1079032	0.52	987	None	HiFi
Bin.3877	93.54	0.86	Gradient Boost (General Model)	11	0.788	1040047	291.955	1040047	0.26	937	None	HiFi
Bin.3915	50.49	0.21	Neural Network (Specific Model)	11	0.933	745849	403.165	1399864	0.5	1082	None	HiFi
Bin.4095	73.94	0.06	Neural Network (Specific Model)	11	0.857	607630	332.559	1782869	0.36	1534	None	HiFi
Bin.4136	66.64	0.82	Neural Network (Specific Model)	11	0.906	492349	328.588	1859275	0.39	1714	None	HiFi
Bin.4145	77.31	0.01	Gradient Boost (General Model)	11	0.825	240847	350.437	2341680	0.51	1840	None	HiFi
Bin.4150	93.11	2.15	Gradient Boost (General Model)	11	0.92	364992	316.908	1067702	0.28	1035	None	HiFi
Bin.4211	51.74	0.09	Neural Network (Specific Model)	11	0.919	203835	364.122	1513625	0.44	1276	None	HiFi
Bin.4219	55.31	1.77	Neural Network (Specific Model)	11	0.872	228091	391.07	2480283	0.54	1847	None	HiFi
Bin.4228	70.79	0.38	Neural Network (Specific Model)	11	0.872	342414	278.881	628108	0.46	656	None	HiFi
Bin.455	93.86	1.25	Gradient Boost (General Model)	11	0.896	144798	348.397	2758502	0.46	2369	None	HiFi
Bin.603	84.54	3.68	Gradient Boost (General Model)	11	0.915	185059	310.948	1516835	0.45	1491	None	HiFi
Bin.71	99.92	0.5	Gradient Boost (General Model)	11	0.89	1615768	354.261	2892322	0.51	2425	None	HiFi
Bin.781	62.18	0.95	Neural Network (Specific Model)	11	0.946	266579	383.01	1897468	0.51	1566	None	HiFi
Bin.784	84.18	0.32	Gradient Boost (General Model)	11	0.908	208814	370.514	2695282	0.5	2205	None	HiFi
Bin.791	81.74	0.09	Gradient Boost (General Model)	11	0.909	189588	353.574	1368943	0.3	1175	None	HiFi
Bin.797	60.83	3.8	Gradient Boost (General Model)	11	0.921	93722	345.859	1040255	0.54	927	None	HiFi
Bin.872	69.93	0.08	Gradient Boost (General Model)	11	0.842	335989	351.027	2011072	0.57	1611	None	HiFi
Bin.895	71.06	0.38	Neural Network (Specific Model)	11	0.914	285908	350.356	2080900	0.51	1812	None	HiFi
Bin.907	69.33	0.56	Gradient Boost (General Model)	11	0.908	311628	326.171	1593200	0.48	1482	None	HiFi
Bin.950	78.57	2.11	Gradient Boost (General Model)	11	0.849	92913	350.924	2246151	0.43	1814	None	HiFi
Bin.951	65.72	0.07	Gradient Boost (General Model)	11	0.891	198530	355.895	1750663	0.57	1462	None	HiFi
dairy-flye.maxbin.055.contigs	95.94	0.22	Gradient Boost (General Model)	11	0.896	900587	284.341	924026	0.45	974	None	HiFi
dairy-flye.metabat2.150.contigs	78.43	1.37	Gradient Boost (General Model)	11	0.885	703135	274.153	2295406	0.57	2483	None	HiFi
dairy-flye.metabat2.206.contigs	72.27	8.62	Gradient Boost (General Model)	11	0.866	132311	272.417	2950216	0.47	3143	None	HiFi
dairy-flye.metabat2.288.contigs	91.66	1.82	Gradient Boost (General Model)	11	0.913	104537	326.66	2555764	0.46	2389	None	HiFi
dairy-flye.metabat2.353.contigs	86.66	0.71	Gradient Boost (General Model)	11	0.875	647610	280.639	1014361	0.46	1058	None	HiFi
dairy-flye.metabat2.448.contigs	66.53	4.49	Gradient Boost (General Model)	11	0.818	2593662	192.757	3047849	0.46	4353	None	HiFi
dairy-flye.metabat2.472.contigs	57.31	4.2	Gradient Boost (General Model)	11	0.818	114988	210.336	2746097	0.49	3589	None	HiFi
dairy-flye.metabat2.486.contigs	85.43	4.2	Gradient Boost (General Model)	11	0.88	260852	261.344	3505125	0.41	3950	None	HiFi
dairy-flye.metabat2.551.contigs	75.35	3.93	Gradient Boost (General Model)	11	0.882	253231	323.898	2827519	0.46	2574	None	HiFi
dairy-flye.metabat2.580.contigs	66.35	1.6	Gradient Boost (General Model)	11	0.87	1210367	266.408	2237207	0.6	2448	None	HiFi
dairy-hifi.maxbin.137.contigs	58.2	1.45	Neural Network (Specific Model)	11	0.879	91255	273.967	1770354	0.45	1900	None	HiFi
dairy-hifi.metabat2.1126.contigs	75.69	2.92	Gradient Boost (General Model)	11	0.864	481572	294.524	873999	0.43	857	None	HiFi
dairy-hifi.metabat2.1285.contigs	75.91	6.7	Gradient Boost (General Model)	11	0.888	77467	275.146	2568639	0.42	2774	None	HiFi
dairy-hifi.metabat2.727.contigs	64.67	1.82	Neural Network (Specific Model)	11	0.854	75309	292.073	2310160	0.5	2262	None	HiFi
dairy-hifi.metabat2.924.contigs	63.92	2.13	Gradient Boost (General Model)	11	0.879	36143	263.839	1756738	0.5	1961	None	HiFi
goat-flye.concoct.004_sub.contigs	95.93	4.36	Gradient Boost (General Model)	11	0.888	2385530	323.023	4029926	0.56	3703	None	HiFi
goat-flye.concoct.032.contigs	94.97	9.47	Gradient Boost (General Model)	11	0.909	153070	316.397	2990370	0.43	2874	None	HiFi
goat-flye.maxbin.001.contigs	99.85	0.59	Neural Network (Specific Model)	11	0.912	4045018	351.355	4142293	0.49	3590	None	HiFi
goat-flye.maxbin.003.contigs	98.05	2.62	Gradient Boost (General Model)	11	0.853	4457385	339.848	4484910	0.51	3759	None	HiFi
goat-flye.maxbin.006.contigs	93.28	0.4	Neural Network (Specific Model)	11	0.934	2588380	360.356	2665210	0.57	2308	None	HiFi
goat-flye.maxbin.007.contigs	90.15	0.22	Neural Network (Specific Model)	11	0.889	2842399	316.421	2952838	0.44	2772	None	HiFi
goat-flye.maxbin.028.contigs	99.46	0.55	Gradient Boost (General Model)	11	0.931	2649651	338.775	2811084	0.44	2579	None	HiFi
goat-flye.maxbin.030.contigs	97.42	3.13	Gradient Boost (General Model)	11	0.88	3928792	321.075	4790711	0.56	4386	None	HiFi
goat-flye.maxbin.037.contigs	94.35	6.85	Gradient Boost (General Model)	4	0.897	1323666	304.264	1744550	0.3	1719	None	HiFi
goat-flye.maxbin.042.contigs	85.36	2.97	Neural Network (Specific Model)	4	0.89	313731	297.164	485920	0.26	487	None	HiFi
goat-flye.maxbin.045.contigs	91.93	0.33	Gradient Boost (General Model)	11	0.931	2442764	370.619	2442764	0.56	2048	None	HiFi
goat-flye.maxbin.049.contigs	99.66	1.85	Gradient Boost (General Model)	11	0.869	3164388	330.061	3224177	0.5	2833	None	HiFi
goat-flye.maxbin.052.contigs	100	1.13	Neural Network (Specific Model)	11	0.899	2342187	313.348	2506404	0.35	2402	None	HiFi
goat-flye.maxbin.053.contigs	92.84	9.05	Gradient Boost (General Model)	11	0.917	1877690	334.655	2225755	0.34	2037	None	HiFi
goat-flye.maxbin.058.contigs	96.04	0.21	Gradient Boost (General Model)	11	0.905	1579825	340.154	2581687	0.54	2293	None	HiFi
goat-flye.maxbin.070.contigs	95.24	2.03	Gradient Boost (General Model)	11	0.875	2297463	340.181	3571195	0.58	3068	None	HiFi
goat-flye.maxbin.077.contigs	98.58	0.12	Gradient Boost (General Model)	11	0.912	2390890	363.819	2390890	0.54	2001	None	HiFi
goat-flye.maxbin.084.contigs	98.05	0.22	Gradient Boost (General Model)	11	0.912	1485888	342.019	2376465	0.45	2116	None	HiFi
goat-flye.maxbin.091.contigs	97.57	0.21	Gradient Boost (General Model)	11	0.877	3218434	330.648	3371969	0.46	2987	None	HiFi
goat-flye.maxbin.095.contigs	96.85	4.68	Neural Network (Specific Model)	11	0.884	1978410	288.582	2974618	0.34	3043	None	HiFi
goat-flye.maxbin.103.contigs	89.04	1.4	Gradient Boost (General Model)	11	0.89	1392495	318.121	2640452	0.58	2468	None	HiFi
goat-flye.maxbin.104.contigs	96.84	1.17	Gradient Boost (General Model)	11	0.876	495166	361.668	3804987	0.56	3075	None	HiFi
goat-flye.maxbin.108.contigs	98.07	1	Gradient Boost (General Model)	11	0.886	1337854	388.007	2669528	0.45	2036	None	HiFi
goat-flye.maxbin.122.contigs	85.82	3.96	Gradient Boost (General Model)	11	0.81	295248	402.884	4238084	0.57	2843	None	HiFi
goat-flye.maxbin.134.contigs	54.81	3.03	Gradient Boost (General Model)	11	0.842	229692	263.524	3258606	0.61	3484	None	HiFi
goat-flye.maxbin.146_sub.contigs	72.63	1.22	Gradient Boost (General Model)	11	0.865	83277	282.1	2457870	0.6	2522	None	HiFi
goat-flye.maxbin.244.contigs	54.59	0.26	Gradient Boost (General Model)	11	0.839	57650	257.764	1169260	0.53	1274	None	HiFi
goat-flye.metabat2.002.contigs	60.53	0.08	Gradient Boost (General Model)	11	0.931	873123	362.209	1345022	0.54	1156	None	HiFi
goat-flye.metabat2.004.contigs	100	0.19	Gradient Boost (General Model)	11	0.889	2345416	361.71	2617568	0.51	2146	None	HiFi
goat-flye.metabat2.011.contigs	99.88	0.61	Neural Network (Specific Model)	11	0.894	1084014	351.702	3903974	0.49	3314	None	HiFi
goat-flye.metabat2.057_sub.contigs	94.48	0	Gradient Boost (General Model)	11	0.933	1057793	346.446	1057793	0.34	951	None	HiFi
goat-flye.metabat2.069.contigs	99.18	0.61	Gradient Boost (General Model)	11	0.899	2948548	348.058	2948548	0.49	2544	None	HiFi
goat-flye.metabat2.096.contigs	90.68	2.21	Gradient Boost (General Model)	11	0.933	796398	320.631	1576435	0.3	1533	None	HiFi
goat-flye.metabat2.110.contigs	96.95	1.28	Gradient Boost (General Model)	11	0.906	639686	337.952	2582546	0.52	2313	None	HiFi
goat-flye.metabat2.112_sub.contigs	97.15	1.15	Gradient Boost (General Model)	11	0.928	1424018	313.723	1424018	0.27	1407	None	HiFi
goat-flye.metabat2.133.contigs	94.82	0.79	Gradient Boost (General Model)	11	0.934	940439	361.592	2776837	0.55	2395	None	HiFi
goat-flye.metabat2.136.contigs	60.17	2.39	Gradient Boost (General Model)	11	0.857	192474	280.161	1607454	0.6	1643	None	HiFi
goat-flye.metabat2.166.contigs	75.6	2.45	Gradient Boost (General Model)	11	0.871	2908615	355.302	3453947	0.47	2828	None	HiFi
goat-flye.metabat2.197.contigs	61.44	0.02	Neural Network (Specific Model)	11	0.876	64033	321.037	2689330	0.5	2453	None	HiFi
goat-flye.metabat2.210.contigs	56.49	2.81	Gradient Boost (General Model)	11	0.874	76513	230.445	2343072	0.5	2981	None	HiFi
goat-flye.metabat2.236.contigs	94.71	0.07	Gradient Boost (General Model)	11	0.919	158648	332.758	1865813	0.48	1724	None	HiFi
goat-flye.metabat2.244.contigs	64.39	0.03	Gradient Boost (General Model)	11	0.911	46839	315.937	1339392	0.48	1293	None	HiFi
goat-flye.metabat2.247.contigs	90.14	1.71	Gradient Boost (General Model)	11	0.892	98776	337.781	3735064	0.43	3296	None	HiFi
goat-flye.metabat2.248_sub.contigs	96.34	1.53	Gradient Boost (General Model)	11	0.922	1029889	331.632	1236974	0.36	1149	None	HiFi
goat-flye.metabat2.278.contigs	69.82	5.68	Gradient Boost (General Model)	11	0.898	331339	320.08	2540703	0.6	2382	None	HiFi
goat-flye.metabat2.280.contigs	81.7	0.5	Neural Network (Specific Model)	11	0.861	1909705	317.98	2102402	0.51	1903	None	HiFi
goat-flye.metabat2.295.contigs	96.44	0.29	Gradient Boost (General Model)	11	0.888	1311160	346.625	2522412	0.52	2158	None	HiFi
goat-flye.metabat2.339.contigs	51.23	0.63	Neural Network (Specific Model)	11	0.874	78258	316.376	2275092	0.57	2101	None	HiFi
goat-flye.metabat2.340.contigs	98.94	2.41	Neural Network (Specific Model)	11	0.887	4901448	380.027	4964369	0.54	3870	None	HiFi
goat-flye.metabat2.347.contigs	73.12	0.44	Gradient Boost (General Model)	11	0.866	126544	267.417	2345656	0.4	2544	None	HiFi
goat-flye.metabat2.358.contigs	95.27	7.75	Gradient Boost (General Model)	11	0.91	408090	323.339	1791661	0.44	1684	None	HiFi
goat-flye.metabat2.370.contigs	98	0.26	Gradient Boost (General Model)	11	0.931	1874199	367.471	2646481	0.53	2240	None	HiFi
goat-flye.metabat2.397.contigs	61.16	0.75	Gradient Boost (General Model)	11	0.84	142994	277.78	2701379	0.51	2735	None	HiFi
goat-flye.metabat2.409.contigs	63.87	0.39	Gradient Boost (General Model)	11	0.853	309786	269.105	1653322	0.58	1752	None	HiFi
goat-flye.metabat2.414.contigs	87.4	0.23	Neural Network (Specific Model)	11	0.898	1852071	356.587	3301605	0.53	2776	None	HiFi
goat-flye.metabat2.415.contigs	83.76	2.69	Gradient Boost (General Model)	11	0.875	125699	312.223	2809070	0.3	2632	None	HiFi
goat-flye.metabat2.437.contigs	70.08	1.32	Gradient Boost (General Model)	11	0.904	716233	388.879	2445831	0.49	1897	None	HiFi
goat-flye.metabat2.459.contigs	96.42	0.06	Gradient Boost (General Model)	11	0.917	2525264	380.796	3013626	0.51	2422	None	HiFi
goat-flye.metabat2.493.contigs	97.91	1.14	Gradient Boost (General Model)	11	0.902	217101	314.564	1007104	0.32	965	None	HiFi
goat-hifi.concoct.039_sub.contigs	59.03	1.84	Gradient Boost (General Model)	11	0.827	27705	249.018	1676795	0.59	1864	None	HiFi
goat-hifi.maxbin.005.contigs	91.22	0.38	Gradient Boost (General Model)	11	0.912	347842	333.09	1989624	0.61	1819	None	HiFi
goat-hifi.maxbin.006_sub.contigs	81.58	4.76	Gradient Boost (General Model)	11	0.882	329653	325.302	3331770	0.59	3017	None	HiFi
goat-hifi.maxbin.007.contigs	96.25	0.22	Gradient Boost (General Model)	11	0.92	2318052	371.797	2901943	0.48	2397	None	HiFi
goat-hifi.maxbin.011.contigs	100	6.18	Gradient Boost (General Model)	11	0.925	2675344	344.543	2791186	0.48	2505	None	HiFi
goat-hifi.maxbin.015.contigs	98.06	0.38	Gradient Boost (General Model)	11	0.921	2754133	364.158	2878595	0.49	2430	None	HiFi
goat-hifi.maxbin.019.contigs	97.55	8.15	Gradient Boost (General Model)	11	0.88	1346457	315.288	4979641	0.56	4643	None	HiFi
goat-hifi.maxbin.024.contigs	94.38	5.98	Gradient Boost (General Model)	11	0.913	1676024	340.845	2786089	0.51	2493	None	HiFi
goat-hifi.maxbin.033.contigs	97.25	0.46	Gradient Boost (General Model)	11	0.939	1772466	374.904	2259578	0.54	1890	None	HiFi
goat-hifi.maxbin.039.contigs	98.27	0	Gradient Boost (General Model)	11	0.898	984940	310.026	984940	0.34	952	None	HiFi
goat-hifi.maxbin.043.contigs	94.59	0.11	Gradient Boost (General Model)	11	0.909	1596339	343.503	2519144	0.54	2225	None	HiFi
goat-hifi.maxbin.055.contigs	95.66	3.91	Gradient Boost (General Model)	11	0.926	2317927	316.569	2509557	0.44	2453	None	HiFi
goat-hifi.maxbin.061.contigs	54.5	1.41	Neural Network (Specific Model)	11	0.937	1357741	363.447	1421535	0.56	1224	None	HiFi
goat-hifi.maxbin.065_sub.contigs	73.61	3.98	Neural Network (Specific Model)	11	0.883	1892995	348.936	2643886	0.59	2234	None	HiFi
goat-hifi.maxbin.066.contigs	95.07	0.39	Gradient Boost (General Model)	11	0.898	945385	309.749	979539	0.36	948	None	HiFi
goat-hifi.maxbin.075.contigs	89.21	7.04	Gradient Boost (General Model)	11	0.929	484002	314.116	2218321	0.52	2193	None	HiFi
goat-hifi.maxbin.079.contigs	83.73	0.43	Neural Network (Specific Model)	11	0.851	1870244	302.644	2877052	0.5	2707	None	HiFi
goat-hifi.maxbin.086.contigs	93.08	1.07	Gradient Boost (General Model)	11	0.882	2580220	392.717	2665108	0.45	1998	None	HiFi
goat-hifi.maxbin.092.contigs	94.69	4.04	Gradient Boost (General Model)	11	0.895	774667	347.141	3303355	0.58	2845	None	HiFi
goat-hifi.maxbin.160.contigs	81.22	3.05	Gradient Boost (General Model)	11	0.878	65824	334.999	1571444	0.54	1378	None	HiFi
goat-hifi.maxbin.236.contigs	55.38	5.35	Gradient Boost (General Model)	11	0.842	30781	254.64	1535676	0.48	1699	None	HiFi
goat-hifi.maxbin.289.contigs	59.24	0.66	Gradient Boost (General Model)	11	0.849	31378	297.794	2609061	0.6	2489	None	HiFi
goat-hifi.metabat2.035.contigs	59.5	1.59	Neural Network (Specific Model)	11	0.891	97917	272.958	503283	0.46	550	None	HiFi
goat-hifi.metabat2.112.contigs	62.55	6.33	Gradient Boost (General Model)	11	0.866	34186	239.606	1369735	0.53	1660	None	HiFi
goat-hifi.metabat2.173.contigs	99.6	0.8	Gradient Boost (General Model)	11	0.866	572569	337.496	3000708	0.51	2570	None	HiFi
goat-hifi.metabat2.190.contigs	66.35	7.64	Gradient Boost (General Model)	11	0.812	72112	269.041	4551474	0.51	4599	None	HiFi
goat-hifi.metabat2.267.contigs	54.31	3.89	Neural Network (Specific Model)	11	0.878	43274	267.316	1460408	0.47	1606	None	HiFi
goat-hifi.metabat2.272.contigs	98.03	0.11	Gradient Boost (General Model)	11	0.913	187349	324.013	2134693	0.48	2012	None	HiFi
goat-hifi.metabat2.274.contigs	72.48	2.21	Neural Network (Specific Model)	11	0.909	1844840	320.866	3104864	0.46	2940	None	HiFi
goat-hifi.metabat2.276.contigs	69.05	0.3	Gradient Boost (General Model)	11	0.916	173324	336.813	2512029	0.57	2285	None	HiFi
goat-hifi.metabat2.288.contigs	73.56	1.45	Gradient Boost (General Model)	11	0.862	95554	309.906	2281231	0.51	2122	None	HiFi
goat-hifi.metabat2.332.contigs	98.89	2.46	Gradient Boost (General Model)	11	0.878	2725178	339.217	4113614	0.48	3554	None	HiFi
goat-hifi.metabat2.334.contigs	69.37	0.36	Gradient Boost (General Model)	11	0.906	988015	328.538	1814285	0.54	1671	None	HiFi
goat-hifi.metabat2.395.contigs	96.69	4.21	Gradient Boost (General Model)	11	0.926	2170243	340.707	2671007	0.49	2429	None	HiFi
goat-hifi.metabat2.399.contigs	92.5	5.67	Neural Network (Specific Model)	11	0.887	2775519	378.993	4892647	0.54	3823	None	HiFi
goat-hifi.metabat2.420.contigs	94.81	0.74	Gradient Boost (General Model)	11	0.916	2564697	330.757	2607712	0.45	2412	None	HiFi
goat-hifi.metabat2.432.contigs	95.1	3.03	Neural Network (Specific Model)	11	0.898	2481540	368.217	4429046	0.46	3607	None	HiFi
goat-hifi.metabat2.435.contigs	96.89	1.72	Gradient Boost (General Model)	11	0.929	2818932	326.17	2818932	0.47	2683	None	HiFi
goat-hifi.metabat2.436.contigs	80.37	2.58	Gradient Boost (General Model)	11	0.913	58312	313.309	2056346	0.54	2004	None	HiFi
goat-hifi.metabat2.452.contigs	75.22	0.77	Gradient Boost (General Model)	11	0.883	82939	308.695	2361689	0.56	2259	None	HiFi
goat-hifi.metabat2.469.contigs	93.28	0.37	Gradient Boost (General Model)	11	0.909	2107775	333.06	3124724	0.47	2850	None	HiFi
goat-hifi.metabat2.474.contigs	95.76	0.09	Gradient Boost (General Model)	11	0.913	2390038	365.231	2390038	0.54	1994	None	HiFi
goat-hifi.metabat2.477.contigs	67.06	1.53	Gradient Boost (General Model)	11	0.876	45778	264.751	2159744	0.48	2393	None	HiFi
goat-hifi.metabat2.501.contigs	80.3	0.06	Gradient Boost (General Model)	11	0.911	143989	325.773	1484086	0.31	1387	None	HiFi
goat-hifi.metabat2.509.contigs	56.2	0.35	Gradient Boost (General Model)	11	0.853	34888	253.41	1777488	0.55	2005	None	HiFi
goat-hifi.metabat2.510.contigs	92.38	8.68	Gradient Boost (General Model)	11	0.874	322067	328.241	5216369	0.59	4636	None	HiFi
goat-hifi.metabat2.515_sub.contigs	53.13	3.05	Neural Network (Specific Model)	11	0.879	99902	315.604	2555961	0.49	2382	None	HiFi
goat-hifi.metabat2.530.contigs	98.16	0.06	Gradient Boost (General Model)	11	0.919	2091003	382.753	3029625	0.51	2427	None	HiFi
goat-hifi.metabat2.531.contigs	75.76	4.37	Neural Network (Specific Model)	11	0.875	351366	361.627	3350677	0.52	2707	None	HiFi
goat-hifi.metabat2.538.contigs	85.16	4.36	Gradient Boost (General Model)	11	0.811	672648	404.598	3886893	0.57	2599	None	HiFi
goat-hifi.metabat2.543.contigs	100	2.04	Gradient Boost (General Model)	11	0.902	2925188	351.287	3979467	0.51	3411	None	HiFi
goat-hifi.metabat2.554.contigs	98.39	0.71	Gradient Boost (General Model)	11	0.902	587480	314.941	1026147	0.32	982	None	HiFi
goat-hifi.metabat2.557.contigs	92.96	1.45	Gradient Boost (General Model)	11	0.899	557144	312.993	3076646	0.48	2954	None	HiFi
goat-hifi.metabat2.672.contigs	50.15	3.17	Neural Network (Specific Model)	11	0.9	37245	303.622	2060073	0.52	2045	None	HiFi
goat-hifi.metabat2.742.contigs	78.86	4.5	Gradient Boost (General Model)	11	0.832	41935	254.461	1505165	0.54	1647	None	HiFi
goat-hifi.metabat2.755.contigs	83.57	0.02	Gradient Boost (General Model)	11	0.924	1509459	363.019	1602622	0.32	1362	None	HiFi
goat-hifi.metabat2.756.contigs	97.38	2.24	Gradient Boost (General Model)	11	0.869	3022521	332.527	3022521	0.59	2637	None	HiFi
goat-hifi.metabat2.761.contigs	74.44	0.09	Gradient Boost (General Model)	11	0.931	1238930	378.763	1813827	0.6	1489	None	HiFi
goat-hifi.metabat2.770.contigs	86.75	5.73	Neural Network (Specific Model)	4	0.888	424431	339.454	1368789	0.31	1195	None	HiFi
goat-hifi.metabat2.773.contigs	66.31	1.02	Gradient Boost (General Model)	11	0.889	28457	269.855	1279564	0.53	1413	None	HiFi
goat-hifi.metabat2.775.contigs	53.88	2.12	Gradient Boost (General Model)	11	0.895	716229	378.846	1932959	0.5	1524	None	HiFi
goat-hifi.metabat2.794.contigs	99.85	1.94	Neural Network (Specific Model)	11	0.896	734012	353.757	3871600	0.49	3273	None	HiFi
goat-hifi.metabat2.809.contigs	93.06	1.22	Gradient Boost (General Model)	11	0.913	142516	291.676	2601276	0.49	2725	None	HiFi
goat-hifi.metabat2.826.contigs	86.49	1.9	Gradient Boost (General Model)	11	0.889	157479	338.357	3446341	0.43	3027	None	HiFi

## Sheet: Table S11
Table S11. Classification reports of 659 MAGs
MAGs	Classification	Origin
Bin.102	d__Bacteria;p__Bacillota_A;c__Clostridia;o__Lachnospirales;f__Lachnospiraceae;g__CAG-603;s__CAG-603 sp900315425	Nanopore
Bin.1039	d__Bacteria;p__Bacteroidota;c__Bacteroidia;o__Bacteroidales;f__UBA932;g__Cryptobacteroides;s__Cryptobacteroides sp902789395	Nanopore
Bin.1075	d__Bacteria;p__Bacteroidota;c__Bacteroidia;o__Bacteroidales;f__UBA932;g__Cryptobacteroides;s__Cryptobacteroides sp016287875	Nanopore
Bin.1092	d__Bacteria;p__Bacteroidota;c__Bacteroidia;o__Bacteroidales;f__UBA932;g__Bact-11;s__	Nanopore
Bin.1118	d__Bacteria;p__Bacillota_A;c__Clostridia;o__Oscillospirales;f__Acutalibacteraceae;g__Ruminococcus_E;s__Ruminococcus_E sp900100595	Nanopore
Bin.1138	d__Bacteria;p__Bacillota;c__Bacilli;o__RFN20;f__CAG-826;g__UBA2450;s__UBA2450 sp002373085	Nanopore
Bin.1154	d__Bacteria;p__Bacillota_A;c__Clostridia;o__Oscillospirales;f__Oscillospiraceae;g__ER4;s__	Nanopore
Bin.1199	d__Bacteria;p__Bacillota_A;c__Clostridia;o__Lachnospirales;f__Lachnospiraceae;g__UBA3766;s__UBA3766 sp902789265	Nanopore
Bin.1267	d__Bacteria;p__Bacteroidota;c__Bacteroidia;o__Bacteroidales;f__Bacteroidaceae;g__Prevotella;s__Prevotella sp017478025	Nanopore
Bin.1283	d__Bacteria;p__Bacillota_A;c__Clostridia;o__Lachnospirales;f__Lachnospiraceae;g__Eubacterium_Q;s__Eubacterium_Q ruminantium	Nanopore
Bin.1310	d__Bacteria;p__Bacteroidota;c__Bacteroidia;o__Bacteroidales;f__Bacteroidaceae;g__Prevotella;s__Prevotella sp900319895	Nanopore
Bin.1321	d__Bacteria;p__Bacillota_A;c__Clostridia;o__Lachnospirales;f__Lachnospiraceae;g__Weimeria;s__	Nanopore
Bin.1344	d__Bacteria;p__Bacteroidota;c__Bacteroidia;o__Bacteroidales;f__Bacteroidaceae;g__UBA4372;s__UBA4372 sp902801325	Nanopore
Bin.1349	d__Bacteria;p__Bacteroidota;c__Bacteroidia;o__Bacteroidales;f__WCHB1-69;g__UBA1756;s__UBA1756 sp900321845	Nanopore
Bin.1367	d__Bacteria;p__Bacteroidota;c__Bacteroidia;o__Bacteroidales;f__Paludibacteraceae;g__UBA4345;s__UBA4345 sp002362105	Nanopore
Bin.1373	d__Bacteria;p__Bacillota_A;c__Clostridia;o__Lachnospirales;f__Lachnospiraceae;g__NK4A136;s__NK4A136 sp000421045	Nanopore
Bin.139	d__Bacteria;p__Bacillota_A;c__Clostridia;o__Oscillospirales;f__Butyricicoccaceae;g__UBA4644;s__UBA4644 sp017394205	Nanopore
Bin.1405	d__Bacteria;p__Bacillota;c__Bacilli;o__RFN20;f__CAG-826;g__Enteromonas;s__Enteromonas sp900317295	Nanopore
Bin.1424	d__Bacteria;p__Pseudomonadota;c__Gammaproteobacteria;o__Burkholderiales;f__Neisseriaceae;g__RGIG3394;s__RGIG3394 sp017446355	Nanopore
Bin.144	d__Bacteria;p__Bacillota_A;c__Clostridia;o__Oscillospirales;f__Acutalibacteraceae;g__RUG592;s__RUG592 sp900317815	Nanopore
Bin.1443	d__Bacteria;p__Bacillota;c__Bacilli;o__Erysipelotrichales;f__Erysipelotrichaceae;g__RUG521;s__RUG521 sp900319675	Nanopore
Bin.1446	d__Bacteria;p__Bacteroidota;c__Bacteroidia;o__Bacteroidales;f__UBA932;g__Cryptobacteroides;s__Cryptobacteroides sp900318955	Nanopore
Bin.1473	d__Bacteria;p__Pseudomonadota;c__Gammaproteobacteria;o__Enterobacterales_A;f__Succinivibrionaceae;g__Succinivibrio;s__Succinivibrio sp900316175	Nanopore
Bin.1475	d__Bacteria;p__Bacillota_A;c__Clostridia;o__Peptostreptococcales;f__Anaerovoracaceae;g__RUG13409;s__	Nanopore
Bin.1488	d__Bacteria;p__Bacillota_A;c__Clostridia;o__Lachnospirales;f__Lachnospiraceae;g__UBA3766;s__UBA3766 sp902789665	Nanopore
Bin.1517	d__Bacteria;p__Bacteroidota;c__Bacteroidia;o__Bacteroidales;f__Bacteroidaceae;g__Prevotella;s__Prevotella sp002391185	Nanopore
Bin.1526	d__Bacteria;p__Bacillota_C;c__Negativicutes;o__Selenomonadales;f__Selenomonadaceae;g__Anaerovibrio;s__Anaerovibrio lipolyticus_A	Nanopore
Bin.153	d__Bacteria;p__Bacteroidota;c__Bacteroidia;o__Bacteroidales;f__Bacteroidaceae;g__Prevotella;s__Prevotella sp900315565	Nanopore
Bin.1536	d__Bacteria;p__Bacillota_A;c__Clostridia;o__Christensenellales;f__Christensenellaceae;g__QANA01;s__QANA01 sp017439085	Nanopore
Bin.1539	d__Bacteria;p__Bacteroidota;c__Bacteroidia;o__Bacteroidales;f__UBA932;g__Cryptobacteroides;s__Cryptobacteroides sp900318565	Nanopore
Bin.1544	d__Bacteria;p__Bacillota_A;c__Clostridia;o__Lachnospirales;f__Lachnospiraceae;g__Acetatifactor;s__Acetatifactor sp017400965	Nanopore
Bin.1545	d__Bacteria;p__Bacillota_A;c__Clostridia;o__Lachnospirales;f__Lachnospiraceae;g__UBA3766;s__UBA3766 sp902803015	Nanopore
Bin.1567	d__Bacteria;p__Bacillota_A;c__Clostridia;o__UBA1212;f__UBA1212;g__UBA1212;s__UBA1212 sp902792515	Nanopore
Bin.1653	d__Bacteria;p__Bacillota_A;c__Clostridia;o__Lachnospirales;f__Lachnospiraceae;g__Eubacterium_Q;s__Eubacterium_Q sp900321215	Nanopore
Bin.1655	d__Bacteria;p__Bacillota_A;c__Clostridia;o__Lachnospirales;f__Lachnospiraceae;g__UBA1753;s__	Nanopore
Bin.1679	d__Bacteria;p__Bacteroidota;c__Bacteroidia;o__Bacteroidales;f__Bacteroidaceae;g__Prevotella;s__Prevotella sp902774815	Nanopore
Bin.1732	d__Bacteria;p__Bacillota_A;c__Clostridia;o__Oscillospirales;f__Oscillospiraceae;g__RUG626;s__	Nanopore
Bin.1736	d__Bacteria;p__Bacillota_A;c__Clostridia;o__Lachnospirales;f__Lachnospiraceae;g__NK4A136;s__	Nanopore
Bin.1751	d__Bacteria;p__Bacillota_A;c__Clostridia;o__Lachnospirales;f__Lachnospiraceae;g__CAG-590;s__	Nanopore
Bin.1768	d__Bacteria;p__Riflebacteria;c__Ozemobacteria;o__Ozemobacterales;f__Ozemobacteraceae;g__RUG334;s__RUG334 sp900317935	Nanopore
Bin.1773	d__Bacteria;p__Bacteroidota;c__Bacteroidia;o__Bacteroidales;f__Paludibacteraceae;g__RF16;s__	Nanopore
Bin.1800	d__Bacteria;p__Bacteroidota;c__Bacteroidia;o__Bacteroidales;f__Bacteroidaceae;g__Prevotella;s__Prevotella sp017442825	Nanopore
Bin.1841	d__Bacteria;p__Bacillota_A;c__Clostridia;o__Oscillospirales;f__Ruminococcaceae;g__CAG-353;s__CAG-353 sp017394475	Nanopore
Bin.1856	d__Bacteria;p__Bacteroidota;c__Bacteroidia;o__Bacteroidales;f__Bacteroidaceae;g__Prevotella;s__Prevotella sp900315775	Nanopore
Bin.1895	d__Bacteria;p__Bacillota;c__Bacilli;o__RFN20;f__CAG-826;g__UBA4951;s__UBA4951 sp017540455	Nanopore
Bin.1913	d__Bacteria;p__Bacillota_A;c__Clostridia;o__Lachnospirales;f__Lachnospiraceae;g__JAILNW01;s__	Nanopore
Bin.1922	d__Bacteria;p__Bacteroidota;c__Bacteroidia;o__Bacteroidales;f__UBA932;g__Cryptobacteroides;s__	Nanopore
Bin.1933	d__Bacteria;p__Bacteroidota;c__Bacteroidia;o__Bacteroidales;f__Bacteroidaceae;g__Prevotella;s__Prevotella sp900115435	Nanopore
Bin.194	d__Bacteria;p__Bacteroidota;c__Bacteroidia;o__Bacteroidales;f__Bacteroidaceae;g__Prevotella;s__Prevotella sp902783625	Nanopore
Bin.1958	d__Bacteria;p__Bacillota;c__Bacilli;o__RFN20;f__CAG-826;g__RUG13091;s__RUG13091 sp016280685	Nanopore
Bin.198	d__Bacteria;p__Bacteroidota;c__Bacteroidia;o__Bacteroidales;f__Bacteroidaceae;g__Prevotella;s__	Nanopore
Bin.1985	d__Bacteria;p__Bacteroidota;c__Bacteroidia;o__Bacteroidales;f__Bacteroidaceae;g__Prevotella;s__Prevotella sp900315075	Nanopore
Bin.203	d__Bacteria;p__Bacteroidota;c__Bacteroidia;o__Bacteroidales;f__F082;g__Limimorpha;s__	Nanopore
Bin.2033	d__Bacteria;p__Bacteroidota;c__Bacteroidia;o__Bacteroidales;f__Bacteroidaceae;g__UBA4372;s__UBA4372 sp017427185	Nanopore
Bin.2051	d__Bacteria;p__Bacillota_A;c__Clostridia;o__Saccharofermentanales;f__Saccharofermentanaceae;g__Saccharofermentans;s__Saccharofermentans sp902782125	Nanopore
Bin.2074	d__Bacteria;p__Bacteroidota;c__Bacteroidia;o__Bacteroidales;f__P3;g__CAJOQB01;s__CAJOQB01 sp905236405	Nanopore
Bin.2080	d__Bacteria;p__Bacteroidota;c__Bacteroidia;o__Bacteroidales;f__Bacteroidaceae;g__Prevotella;s__Prevotella sp900316295	Nanopore
Bin.2081	d__Bacteria;p__Myxococcota;c__Bradymonadia;o__UBA4248;f__UBA4248;g__UBA4248;s__	Nanopore
Bin.2092	d__Bacteria;p__Bacteroidota;c__Bacteroidia;o__Bacteroidales;f__P3;g__UBA1217;s__UBA1217 sp902793295	Nanopore
Bin.2119	d__Bacteria;p__Bacillota_A;c__Clostridia;o__Oscillospirales;f__Acutalibacteraceae;g__CAG-177;s__	Nanopore
Bin.2132	d__Bacteria;p__Bacillota_A;c__Clostridia;o__Oscillospirales;f__Oscillospiraceae;g__UBA1774;s__UBA1774 sp902795345	Nanopore
Bin.2149	d__Bacteria;p__Bacteroidota;c__Bacteroidia;o__Bacteroidales;f__UBA932;g__Cryptobacteroides;s__Cryptobacteroides sp900317925	Nanopore
Bin.2153	d__Bacteria;p__Bacteroidota;c__Bacteroidia;o__Bacteroidales;f__Bacteroidaceae;g__Prevotella;s__Prevotella sp900316285	Nanopore
Bin.2165	d__Bacteria;p__Bacteroidota;c__Bacteroidia;o__Bacteroidales;f__UBA932;g__Cryptobacteroides;s__Cryptobacteroides sp900318015	Nanopore
Bin.2167	d__Bacteria;p__Bacteroidota;c__Bacteroidia;o__Bacteroidales;f__UBA932;g__Cryptobacteroides;s__	Nanopore
Bin.2176	d__Bacteria;p__Bacillota_A;c__Clostridia;o__Oscillospirales;f__Acutalibacteraceae;g__UBA1213;s__UBA1213 sp902766305	Nanopore
Bin.2190	d__Bacteria;p__Bacteroidota;c__Bacteroidia;o__Bacteroidales;f__UBA932;g__Cryptobacteroides;s__	Nanopore
Bin.2203	d__Bacteria;p__Bacillota;c__Bacilli;o__RFN20;f__CAG-826;g__RGIG3315;s__	Nanopore
Bin.2270	d__Bacteria;p__Bacteroidota;c__Bacteroidia;o__Bacteroidales;f__UBA3824;g__UBA3824;s__UBA3824 sp017544805	Nanopore
Bin.2305	d__Bacteria;p__Pseudomonadota;c__Alphaproteobacteria;o__Rs-D84;f__Rs-D84;g__Enterousia;s__	Nanopore
Bin.2317	d__Bacteria;p__Bacillota_A;c__Clostridia;o__Oscillospirales;f__Ruminococcaceae;g__CAG-353;s__CAG-353 sp002395525	Nanopore
Bin.2337	d__Bacteria;p__Bacteroidota;c__Bacteroidia;o__Bacteroidales;f__P3;g__UBA1217;s__UBA1217 sp017522065	Nanopore
Bin.2365	d__Bacteria;p__Bacillota;c__Bacilli;o__Mycoplasmatales;f__Mycoplasmoidaceae;g__RUG11194;s__	Nanopore
Bin.2369	d__Bacteria;p__Bacillota_A;c__Clostridia;o__Lachnospirales;f__Lachnospiraceae;g__RUG11200;s__	Nanopore
Bin.2376	d__Bacteria;p__Bacillota_A;c__Clostridia;o__Oscillospirales;f__Acutalibacteraceae;g__Fimenecus;s__Fimenecus sp900315985	Nanopore
Bin.2401	d__Bacteria;p__Bacillota_A;c__Clostridia;o__Lachnospirales;f__Lachnospiraceae;g__Wujia;s__	Nanopore
Bin.2415	d__Archaea;p__Thermoplasmatota;c__Thermoplasmata;o__Methanomassiliicoccales;f__Methanomethylophilaceae;g__Methanomethylophilus;s__Methanomethylophilus sp902787415	Nanopore
Bin.2416	d__Bacteria;p__Bacillota;c__Bacilli;o__RFN20;f__CAG-288;g__Enterosoma;s__Enterosoma sp902771745	Nanopore
Bin.2420	d__Bacteria;p__Bacteroidota;c__Bacteroidia;o__Bacteroidales;f__Paludibacteraceae;g__RF16;s__RF16 sp900316005	Nanopore
Bin.2425	d__Bacteria;p__Bacteroidota;c__Bacteroidia;o__Bacteroidales;f__Bacteroidaceae;g__Prevotella;s__Prevotella sp002353585	Nanopore
Bin.244	d__Bacteria;p__Bacteroidota;c__Bacteroidia;o__Bacteroidales;f__Bacteroidaceae;g__UBA4372;s__UBA4372 sp016280855	Nanopore
Bin.2457	d__Bacteria;p__Bacteroidota;c__Bacteroidia;o__Bacteroidales;f__Paludibacteraceae;g__RF16;s__	Nanopore
Bin.2511	d__Bacteria;p__Bacillota_A;c__Clostridia;o__TANB77;f__CAG-508;g__CAG-793;s__	Nanopore
Bin.2533	d__Bacteria;p__Pseudomonadota;c__Alphaproteobacteria;o__Rs-D84;f__Rs-D84;g__Enterousia;s__	Nanopore
Bin.2563	d__Bacteria;p__Bacteroidota;c__Bacteroidia;o__Bacteroidales;f__UBA932;g__Cryptobacteroides;s__Cryptobacteroides sp902801885	Nanopore
Bin.2608	d__Bacteria;p__Bacillota_A;c__Clostridia;o__Lachnospirales;f__Lachnospiraceae;g__CAG-603;s__CAG-603 sp902773095	Nanopore
Bin.2615	d__Bacteria;p__Bacteroidota;c__Bacteroidia;o__Bacteroidales;f__Bacteroidaceae;g__Prevotella;s__Prevotella sp900315745	Nanopore
Bin.2676	d__Bacteria;p__Bacillota_A;c__Clostridia;o__Lachnospirales;f__Lachnospiraceae;g__UBA3775;s__UBA3775 sp902772565	Nanopore
Bin.2682	d__Bacteria;p__Bacteroidota;c__Bacteroidia;o__Bacteroidales;f__P3;g__UBA1711;s__	Nanopore
Bin.2697	d__Bacteria;p__Bacteroidota;c__Bacteroidia;o__Bacteroidales;f__Bacteroidaceae;g__UBA4334;s__UBA4334 sp900316505	Nanopore
Bin.270	d__Bacteria;p__Bacteroidota;c__Bacteroidia;o__Bacteroidales;f__P3;g__UBA1711;s__UBA1711 sp002368955	Nanopore
Bin.2703	d__Bacteria;p__Cyanobacteriota;c__Vampirovibrionia;o__Gastranaerophilales;f__Gastranaerophilaceae;g__RUG14219;s__	Nanopore
Bin.2725	d__Bacteria;p__Bacteroidota;c__Bacteroidia;o__Bacteroidales;f__P3;g__UBA1711;s__UBA1711 sp900318175	Nanopore
Bin.2726	d__Bacteria;p__Bacteroidota;c__Bacteroidia;o__Bacteroidales;f__UBA932;g__Cryptobacteroides;s__Cryptobacteroides sp900320185	Nanopore
Bin.2735	d__Bacteria;p__Bacillota_A;c__Clostridia;o__TANB77;f__CAG-508;g__UMGS1994;s__	Nanopore
Bin.2819	d__Bacteria;p__Spirochaetota;c__Spirochaetia;o__CADAEX01;f__CADAEX01;g__CADAEX01;s__CADAEX01 sp902787125	Nanopore
Bin.2845	d__Bacteria;p__Verrucomicrobiota;c__Verrucomicrobiae;o__Opitutales;f__LL51;g__;s__	Nanopore
Bin.2856	d__Bacteria;p__Bacillota_A;c__Clostridia;o__Oscillospirales;f__Oscillospiraceae;g__Limivicinus;s__	Nanopore
Bin.2906	d__Bacteria;p__Cyanobacteriota;c__Vampirovibrionia;o__Gastranaerophilales;f__Gastranaerophilaceae;g__Zag111;s__	Nanopore
Bin.2917	d__Bacteria;p__Bacteroidota;c__Bacteroidia;o__Bacteroidales;f__Bacteroidaceae;g__Prevotella;s__	Nanopore
Bin.2969	d__Bacteria;p__Bacteroidota;c__Bacteroidia;o__Bacteroidales;f__UBA932;g__Cryptobacteroides;s__Cryptobacteroides sp002396335	Nanopore
Bin.2972	d__Bacteria;p__Bacillota_A;c__Clostridia;o__Lachnospirales;f__Lachnospiraceae;g__Weimeria;s__Weimeria sp016288825	Nanopore
Bin.2996	d__Bacteria;p__Spirochaetota;c__Spirochaetia;o__Sphaerochaetales;f__Sphaerochaetaceae;g__UBA9732;s__UBA9732 sp902781545	Nanopore
Bin.3003	d__Bacteria;p__Bacillota_A;c__Clostridia;o__Lachnospirales;f__Lachnospiraceae;g__NC2004;s__NC2004 sp000621905	Nanopore
Bin.3017	d__Bacteria;p__Verrucomicrobiota;c__Kiritimatiellia;o__RFP12;f__UBA1067;g__UBA1067;s__UBA1067 sp017418445	Nanopore
Bin.3022	d__Bacteria;p__Bacillota_A;c__Clostridia;o__Lachnospirales;f__Lachnospiraceae;g__Acetatifactor;s__	Nanopore
Bin.305	d__Bacteria;p__Pseudomonadota;c__Gammaproteobacteria;o__Burkholderiales;f__Burkholderiaceae_A;g__Duodenibacillus;s__Duodenibacillus sp900315045	Nanopore
Bin.3053	d__Bacteria;p__Bacteroidota;c__Bacteroidia;o__Bacteroidales;f__Bacteroidaceae;g__Prevotella;s__Prevotella sp900320445	Nanopore
Bin.3055	d__Bacteria;p__Bacteroidota;c__Bacteroidia;o__Bacteroidales;f__Muribaculaceae;g__Sodaliphilus;s__Sodaliphilus sp900318065	Nanopore
Bin.3063	d__Bacteria;p__Bacillota_A;c__Clostridia;o__Lachnospirales;f__Lachnospiraceae;g__UBA4292;s__UBA4292 sp902790095	Nanopore
Bin.3084	d__Bacteria;p__Bacillota_A;c__Clostridia;o__Oscillospirales;f__Oscillospiraceae;g__Limivicinus;s__	Nanopore
Bin.3086	d__Bacteria;p__Bacteroidota;c__Bacteroidia;o__Bacteroidales;f__Bacteroidaceae;g__Ga6A1;s__Ga6A1 sp900102385	Nanopore
Bin.3097	d__Bacteria;p__Bacteroidota;c__Bacteroidia;o__Bacteroidales;f__Muribaculaceae;g__Sodaliphilus;s__Sodaliphilus sp902761475	Nanopore
Bin.3099	d__Bacteria;p__Bacillota_A;c__Clostridia;o__TANB77;f__UBA1234;g__RGIG6105;s__	Nanopore
Bin.3150	d__Bacteria;p__Bacteroidota;c__Bacteroidia;o__Bacteroidales;f__ML635J-15;g__Bact-19;s__Bact-19 sp902800045	Nanopore
Bin.3233	d__Bacteria;p__Fibrobacterota;c__Fibrobacteria;o__Fibrobacterales;f__Fibrobacteraceae;g__Fibrobacter;s__	Nanopore
Bin.3245	d__Bacteria;p__Spirochaetota;c__Spirochaetia;o__Treponematales;f__Treponemataceae;g__Treponema_D;s__	Nanopore
Bin.3265	d__Bacteria;p__Bacteroidota;c__Bacteroidia;o__Bacteroidales;f__UBA932;g__Cryptobacteroides;s__Cryptobacteroides sp902782225	Nanopore
Bin.3293	d__Bacteria;p__Bacteroidota;c__Bacteroidia;o__Bacteroidales;f__UBA932;g__Cryptobacteroides;s__Cryptobacteroides sp902766985	Nanopore
Bin.3348	d__Bacteria;p__Bacillota_A;c__Clostridia;o__Lachnospirales;f__Lachnospiraceae;g__;s__	Nanopore
Bin.3387	d__Bacteria;p__Bacteroidota;c__Bacteroidia;o__Bacteroidales;f__Bacteroidaceae;g__UBA4372;s__UBA4372 sp902775385	Nanopore
Bin.3418	d__Bacteria;p__Bacillota_A;c__Clostridia;o__Lachnospirales;f__Lachnospiraceae;g__Agathobacter;s__Agathobacter ruminis	Nanopore
Bin.347	d__Bacteria;p__Bacteroidota;c__Bacteroidia;o__Bacteroidales;f__P3;g__UBA1711;s__UBA1711 sp902778925	Nanopore
Bin.3490	d__Bacteria;p__Patescibacteria;c__Saccharimonadia;o__Saccharimonadales;f__Nanosyncoccaceae;g__UBA2834;s__UBA2834 sp020626475	Nanopore
Bin.3492	d__Bacteria;p__Bacillota_A;c__Clostridia;o__Lachnospirales;f__Lachnospiraceae;g__RGIG5612;s__RGIG5612 sp017536965	Nanopore
Bin.3496	d__Bacteria;p__Bacillota_A;c__Clostridia;o__Lachnospirales;f__Lachnospiraceae;g__UBA3766;s__UBA3766 sp017518735	Nanopore
Bin.3502	d__Bacteria;p__Bacillota_A;c__Clostridia;o__Oscillospirales;f__Ruminococcaceae;g__Ruminococcus;s__Ruminococcus flavefaciens_L	Nanopore
Bin.3503	d__Bacteria;p__Bacteroidota;c__Bacteroidia;o__Bacteroidales;f__Bacteroidaceae;g__UBA6382;s__UBA6382 sp902792555	Nanopore
Bin.3509	d__Bacteria;p__Bacteroidota;c__Bacteroidia;o__Bacteroidales;f__P3;g__UBA1711;s__UBA1711 sp900321975	Nanopore
Bin.3521	d__Bacteria;p__Bacteroidota;c__Bacteroidia;o__Bacteroidales;f__Bacteroidaceae;g__Prevotella;s__Prevotella sp017959365	Nanopore
Bin.3531	d__Bacteria;p__Verrucomicrobiota;c__Lentisphaeria;o__UBA1407;f__UBA1407;g__UBA1407;s__UBA1407 sp902776645	Nanopore
Bin.3539	d__Bacteria;p__Bacteroidota;c__Bacteroidia;o__Bacteroidales;f__UBA932;g__Cryptobacteroides;s__Cryptobacteroides sp017519865	Nanopore
Bin.3543	d__Bacteria;p__Bacteroidota;c__Bacteroidia;o__Bacteroidales;f__Bacteroidaceae;g__Alloprevotella;s__Alloprevotella sp900321445	Nanopore
Bin.3570	d__Bacteria;p__Bacteroidota;c__Bacteroidia;o__Bacteroidales;f__Paludibacteraceae;g__RF16;s__RF16 sp017448985	Nanopore
Bin.3578	d__Bacteria;p__Bacillota_A;c__Clostridia;o__Oscillospirales;f__CAG-272;g__RUG11130;s__RUG11130 sp017545225	Nanopore
Bin.3623	d__Bacteria;p__Bacteroidota;c__Bacteroidia;o__Bacteroidales;f__UBA3663;g__UBA3663;s__UBA3663 sp017632695	Nanopore
Bin.3630	d__Archaea;p__Methanobacteriota;c__Methanobacteria;o__Methanobacteriales;f__Methanobacteriaceae;g__Methanobrevibacter;s__Methanobrevibacter sp900314635	Nanopore
Bin.3641	d__Bacteria;p__Bacillota_A;c__Clostridia;o__Lachnospirales;f__Lachnospiraceae;g__CAG-603;s__CAG-603 sp900110975	Nanopore
Bin.3685	d__Bacteria;p__Bacteroidota;c__Bacteroidia;o__Bacteroidales;f__UBA932;g__Cryptobacteroides;s__Cryptobacteroides sp902787295	Nanopore
Bin.3717	d__Bacteria;p__Bacillota_A;c__Clostridia;o__Lachnospirales;f__Lachnospiraceae;g__CAG-603;s__CAG-603 sp900314525	Nanopore
Bin.3736	d__Bacteria;p__Bacteroidota;c__Bacteroidia;o__Bacteroidales;f__Paludibacteraceae;g__RF16;s__RF16 sp902785805	Nanopore
Bin.3745	d__Bacteria;p__Patescibacteria;c__Saccharimonadia;o__Saccharimonadales;f__Nanosyncoccaceae;g__Nanosyncoccus;s__	Nanopore
Bin.3746	d__Bacteria;p__Bacteroidota;c__Bacteroidia;o__Bacteroidales;f__Paludibacteraceae;g__RF16;s__RF16 sp902785605	Nanopore
Bin.3775	d__Bacteria;p__Bacteroidota;c__Bacteroidia;o__Bacteroidales;f__Bacteroidaceae;g__Phocaeicola;s__	Nanopore
Bin.378	d__Bacteria;p__Patescibacteria;c__Saccharimonadia;o__Saccharimonadales;f__Nanosyncoccaceae;g__UBA2834;s__UBA2834 sp017418275	Nanopore
Bin.3877	d__Bacteria;p__Pseudomonadota;c__Alphaproteobacteria;o__RUG11792;f__RUG11792;g__RUG11792;s__RUG11792 sp017475965	Nanopore
Bin.3899	d__Bacteria;p__Bacillota_A;c__Clostridia;o__Saccharofermentanales;f__Saccharofermentanaceae;g__Firm-16;s__Firm-16 sp017428545	Nanopore
Bin.3915	d__Bacteria;p__Bacteroidota;c__Bacteroidia;o__Bacteroidales;f__F082;g__Limimorpha;s__Limimorpha sp016284305	Nanopore
Bin.3916	d__Bacteria;p__Pseudomonadota;c__Alphaproteobacteria;o__RF32;f__CAG-239;g__Scatocola;s__	Nanopore
Bin.3956	d__Bacteria;p__Bacillota_A;c__Clostridia;o__Lachnospirales;f__Lachnospiraceae;g__UBA3775;s__UBA3775 sp017437965	Nanopore
Bin.3957	d__Bacteria;p__Bacillota_A;c__Clostridia;o__Lachnospirales;f__Lachnospiraceae;g__Butyrivibrio;s__Butyrivibrio hungatei_B	Nanopore
Bin.396	d__Bacteria;p__Bacillota_A;c__Clostridia;o__Oscillospirales;f__Ruminococcaceae;g__Ruminiclostridium_E;s__	Nanopore
Bin.3961	d__Bacteria;p__Bacillota_A;c__Clostridia;o__Christensenellales;f__CAG-74;g__SFMI01;s__SFMI01 sp017544935	Nanopore
Bin.3963	d__Bacteria;p__Bacillota;c__Bacilli;o__RFN20;f__CAG-826;g__Enteromonas;s__Enteromonas sp900316365	Nanopore
Bin.3977	d__Bacteria;p__Bacteroidota;c__Bacteroidia;o__Bacteroidales;f__UBA932;g__Cryptobacteroides;s__Cryptobacteroides sp017458265	Nanopore
Bin.402	d__Bacteria;p__Desulfobacterota;c__Desulfovibrionia;o__Desulfovibrionales;f__Desulfovibrionaceae;g__Mailhella;s__Mailhella sp902783285	Nanopore
Bin.4020	d__Bacteria;p__Bacillota;c__Bacilli;o__Erysipelotrichales;f__Erysipelotrichaceae;g__UBA636;s__	Nanopore
Bin.4032	d__Bacteria;p__Bacillota_A;c__Clostridia;o__TANB77;f__CAG-508;g__HGM13634;s__	Nanopore
Bin.404	d__Bacteria;p__Bacillota_A;c__Clostridia;o__Oscillospirales;f__CAG-272;g__CAG-390;s__CAG-390 sp902803255	Nanopore
Bin.4065	d__Bacteria;p__Bacillota;c__Bacilli;o__Erysipelotrichales;f__Erysipelotrichaceae;g__RUG521;s__	Nanopore
Bin.4095	d__Bacteria;p__Bacillota_A;c__Clostridia;o__Lachnospirales;f__Lachnospiraceae;g__Lachnospira;s__Lachnospira multipara	Nanopore
Bin.413	d__Bacteria;p__Bacillota_A;c__Clostridia;o__Lachnospirales;f__Lachnospiraceae;g__CAG-590;s__CAG-590 sp900313855	Nanopore
Bin.4136	d__Bacteria;p__Spirochaetota;c__Spirochaetia;o__Treponematales;f__Treponemataceae;g__Treponema_D;s__Treponema_D sp017386165	Nanopore
Bin.4145	d__Bacteria;p__Pseudomonadota;c__Gammaproteobacteria;o__Enterobacterales_A;f__Succinivibrionaceae;g__Succinimonas;s__Succinimonas sp002372325	Nanopore
Bin.4150	d__Bacteria;p__Bacillota;c__Bacilli;o__RF39;f__UBA660;g__Coprovivens;s__Coprovivens sp902795675	Nanopore
Bin.4210	d__Bacteria;p__Verrucomicrobiota;c__Lentisphaeria;o__UBA1407;f__UBA1407;g__RGIG1601;s__	Nanopore
Bin.4211	d__Bacteria;p__Bacteroidota;c__Bacteroidia;o__Bacteroidales;f__Bacteroidaceae;g__UBA4293;s__UBA4293 sp002395835	Nanopore
Bin.4219	d__Bacteria;p__Bacteroidota;c__Bacteroidia;o__Bacteroidales;f__Bacteroidaceae;g__UBA4372;s__UBA4372 sp024693505	Nanopore
Bin.4228	d__Bacteria;p__Patescibacteria;c__Saccharimonadia;o__Saccharimonadales;f__Nanosyncoccaceae;g__UBA2834;s__	Nanopore
Bin.4268	d__Bacteria;p__Bacillota_A;c__Clostridia;o__Oscillospirales;f__CAG-272;g__UBA1248;s__UBA1248 sp902784545	Nanopore
Bin.4304	d__Bacteria;p__Pseudomonadota;c__Gammaproteobacteria;o__Enterobacterales_A;f__Succinivibrionaceae;g__Ruminobacter;s__Ruminobacter sp900315145	Nanopore
Bin.4309	d__Bacteria;p__Bacteroidota;c__Bacteroidia;o__Bacteroidales;f__Paludibacteraceae;g__Enterocola;s__Enterocola sp900316125	Nanopore
Bin.4366	d__Bacteria;p__Bacillota_A;c__Clostridia;o__Oscillospirales;f__Oscillospiraceae;g__Limivicinus;s__Limivicinus sp902802045	Nanopore
Bin.437	d__Bacteria;p__Bacillota_A;c__Clostridia;o__Lachnospirales;f__Lachnospiraceae;g__RUG11977;s__RUG11977 sp016287095	Nanopore
Bin.455	d__Bacteria;p__Bacillota_A;c__Clostridia;o__Lachnospirales;f__Lachnospiraceae;g__RGIG6904;s__	Nanopore
Bin.527	d__Bacteria;p__Bacillota_C;c__Negativicutes;o__Acidaminococcales;f__Acidaminococcaceae;g__Succiniclasticum;s__Succiniclasticum sp900315345	Nanopore
Bin.529	d__Bacteria;p__Bacillota;c__Bacilli;o__Erysipelotrichales;f__Erysipelotrichaceae;g__UBA636;s__	Nanopore
Bin.567	d__Archaea;p__Thermoplasmatota;c__Thermoplasmata;o__Methanomassiliicoccales;f__Methanomethylophilaceae;g__Methanomethylophilus;s__	Nanopore
Bin.569	d__Bacteria;p__Pseudomonadota;c__Alphaproteobacteria;o__RUG11792;f__RUG11792;g__RUG14087;s__	Nanopore
Bin.603	d__Bacteria;p__Bacillota;c__Bacilli;o__Erysipelotrichales;f__Erysipelotrichaceae;g__RUG521;s__	Nanopore
Bin.615	d__Bacteria;p__Bacteroidota;c__Bacteroidia;o__Bacteroidales;f__Bacteroidaceae;g__UBA6382;s__UBA6382 sp002372095	Nanopore
Bin.685	d__Bacteria;p__Bacteroidota;c__Bacteroidia;o__Bacteroidales;f__UBA932;g__Cryptobacteroides;s__Cryptobacteroides sp902768665	Nanopore
Bin.691	d__Bacteria;p__Bacillota;c__Bacilli;o__ML615J-28;f__CAG-313;g__UBA1231;s__	Nanopore
Bin.707	d__Bacteria;p__Bacillota_A;c__Clostridia;o__Lachnospirales;f__Lachnospiraceae;g__CAG-411;s__CAG-411 sp017393285	Nanopore
Bin.708	d__Bacteria;p__Bacillota_A;c__Clostridia;o__Lachnospirales;f__Lachnospiraceae;g__RUG11977;s__	Nanopore
Bin.71	d__Bacteria;p__Bacillota_A;c__Clostridia;o__Lachnospirales;f__Lachnospiraceae;g__UBA1201;s__UBA1201 sp900319565	Nanopore
Bin.723	d__Bacteria;p__Bacteroidota;c__Bacteroidia;o__Bacteroidales;f__P3;g__UBA1711;s__UBA1711 sp017501495	Nanopore
Bin.781	d__Bacteria;p__Bacteroidota;c__Bacteroidia;o__Bacteroidales;f__UBA932;g__Cryptobacteroides;s__Cryptobacteroides sp902785575	Nanopore
Bin.784	d__Bacteria;p__Bacteroidota;c__Bacteroidia;o__Bacteroidales;f__UBA932;g__Cryptobacteroides;s__Cryptobacteroides sp002308935	Nanopore
Bin.791	d__Bacteria;p__Bacillota;c__Bacilli;o__ML615J-28;f__CAG-698;g__RGIG3506;s__	Nanopore
Bin.797	d__Bacteria;p__Bacteroidota;c__Bacteroidia;o__Bacteroidales;f__UBA932;g__Cryptobacteroides;s__Cryptobacteroides sp900319375	Nanopore
Bin.819	d__Bacteria;p__Bacillota_A;c__Clostridia;o__Peptostreptococcales;f__Anaerovoracaceae;g__RGIG7041;s__RGIG7041 sp017543805	Nanopore
Bin.86	d__Bacteria;p__Bacteroidota;c__Bacteroidia;o__Bacteroidales;f__Muribaculaceae;g__Sodaliphilus;s__Sodaliphilus sp902776835	Nanopore
Bin.872	d__Bacteria;p__Pseudomonadota;c__Gammaproteobacteria;o__Enterobacterales_A;f__Succinivibrionaceae;g__UBA2810;s__UBA2810 sp900317945	Nanopore
Bin.895	d__Bacteria;p__Bacteroidota;c__Bacteroidia;o__Bacteroidales;f__Bacteroidaceae;g__Prevotella;s__Prevotella sp900313805	Nanopore
Bin.907	d__Bacteria;p__Bacillota;c__Bacilli;o__Erysipelotrichales;f__Erysipelotrichaceae;g__RUG14871;s__	Nanopore
Bin.950	d__Bacteria;p__Bacillota_A;c__Clostridia;o__Oscillospirales;f__Ruminococcaceae;g__HUN007;s__HUN007 sp017438745	Nanopore
Bin.951	d__Bacteria;p__Bacillota_A;c__Clostridia;o__Peptostreptococcales;f__Anaerovoracaceae;g__RGIG2707;s__RGIG2707 sp017428655	Nanopore
Bin.977	d__Bacteria;p__Bacteroidota;c__Bacteroidia;o__Bacteroidales;f__Bacteroidaceae;g__Prevotella;s__Prevotella sp902768785	Nanopore
dairy-flye.maxbin.024.contigs	d__Bacteria;p__Bacillota_C;c__Negativicutes;o__Acidaminococcales;f__Acidaminococcaceae;g__Succiniclasticum;s__Succiniclasticum sp900315925	HiFi
dairy-flye.maxbin.044.contigs	d__Bacteria;p__Patescibacteria;c__Saccharimonadia;o__Saccharimonadales;f__Nanosyncoccaceae;g__Nanosyncoccus;s__	HiFi
dairy-flye.maxbin.055.contigs	d__Bacteria;p__Patescibacteria;c__Saccharimonadia;o__Saccharimonadales;f__Nanosyncoccaceae;g__UBA2834;s__	HiFi
dairy-flye.maxbin.112.contigs	d__Bacteria;p__Bacillota;c__Bacilli;o__RFN20;f__CAG-288;g__Scatoplasma;s__	HiFi
dairy-flye.maxbin.118.contigs	d__Bacteria;p__Bacillota_A;c__Clostridia;o__Lachnospirales;f__Lachnospiraceae;g__CAG-791;s__	HiFi
dairy-flye.metabat2.067.contigs	d__Bacteria;p__Bacillota_A;c__Clostridia;o__Saccharofermentanales;f__Saccharofermentanaceae;g__Saccharofermentans;s__	HiFi
dairy-flye.metabat2.085.contigs	d__Bacteria;p__Bacteroidota;c__Bacteroidia;o__Bacteroidales;f__Bacteroidaceae;g__UBA4372;s__	HiFi
dairy-flye.metabat2.108.contigs	d__Bacteria;p__Bacteroidota;c__Bacteroidia;o__Bacteroidales;f__P3;g__UBA1711;s__UBA1711 sp002309955	HiFi
dairy-flye.metabat2.150.contigs	d__Bacteria;p__Bacteroidota;c__Bacteroidia;o__Bacteroidales;f__UBA932;g__Cryptobacteroides;s__Cryptobacteroides sp016288775	HiFi
dairy-flye.metabat2.155.contigs	d__Bacteria;p__Bacillota_A;c__Clostridia;o__Lachnospirales;f__Lachnospiraceae;g__Eubacterium_Q;s__Eubacterium_Q ruminantium	HiFi
dairy-flye.metabat2.206.contigs	d__Bacteria;p__Bacteroidota;c__Bacteroidia;o__Bacteroidales;f__P3;g__UBA1217;s__UBA1217 sp902796265	HiFi
dairy-flye.metabat2.210.contigs	d__Bacteria;p__Patescibacteria;c__Saccharimonadia;o__Saccharimonadales;f__Nanosyncoccaceae;g__Nanosyncoccus;s__	HiFi
dairy-flye.metabat2.211.contigs	d__Bacteria;p__Bacillota;c__Bacilli;o__RFN20;f__CAG-826;g__Enteromonas;s__Enteromonas sp900316365	HiFi
dairy-flye.metabat2.212.contigs	d__Bacteria;p__Bacillota;c__Bacilli;o__RF39;f__UBA660;g__UBA3789;s__	HiFi
dairy-flye.metabat2.220.contigs	d__Bacteria;p__Bacillota_A;c__Clostridia;o__Oscillospirales;f__Acutalibacteraceae;g__UBA1227;s__	HiFi
dairy-flye.metabat2.251.contigs	d__Bacteria;p__Bacteroidota;c__Bacteroidia;o__Bacteroidales;f__Bacteroidaceae;g__Prevotella;s__Prevotella sp902761605	HiFi
dairy-flye.metabat2.280.contigs	d__Bacteria;p__Bacillota_A;c__Clostridia;o__Oscillospirales;f__Acutalibacteraceae;g__RUG420;s__RUG420 sp017433225	HiFi
dairy-flye.metabat2.288.contigs	d__Bacteria;p__Bacteroidota;c__Bacteroidia;o__Bacteroidales;f__F082;g__Limimorpha;s__Limimorpha sp902787095	HiFi
dairy-flye.metabat2.293.contigs	d__Bacteria;p__Verrucomicrobiota;c__Kiritimatiellia;o__RFP12;f__UBA1067;g__UBA1067;s__	HiFi
dairy-flye.metabat2.343.contigs	d__Bacteria;p__Bacteroidota;c__Bacteroidia;o__Bacteroidales;f__Bacteroidaceae;g__Prevotella;s__Prevotella sp900316645	HiFi
dairy-flye.metabat2.353.contigs	d__Bacteria;p__Patescibacteria;c__Saccharimonadia;o__Saccharimonadales;f__Nanosyncoccaceae;g__UBA2834;s__	HiFi
dairy-flye.metabat2.366.contigs	d__Bacteria;p__Bacteroidota;c__Bacteroidia;o__Bacteroidales;f__UBA932;g__Cryptobacteroides;s__Cryptobacteroides sp900319685	HiFi
dairy-flye.metabat2.388_sub.contigs	d__Bacteria;p__Fibrobacterota;c__Fibrobacteria;o__Fibrobacterales;f__Fibrobacteraceae;g__Fibrobacter;s__Fibrobacter succinogenes_C	HiFi
dairy-flye.metabat2.405.contigs	d__Bacteria;p__Bacillota_A;c__Clostridia;o__Christensenellales;f__CAG-74;g__RUG740;s__RUG740 sp017447185	HiFi
dairy-flye.metabat2.444.contigs	d__Bacteria;p__Bacillota_A;c__Clostridia;o__Oscillospirales;f__Oscillospiraceae;g__Limivicinus;s__Limivicinus sp900317375	HiFi
dairy-flye.metabat2.448.contigs	d__Bacteria;p__Bacillota_A;c__Clostridia;o__Saccharofermentanales;f__Saccharofermentanaceae;g__Saccharofermentans;s__Saccharofermentans sp001604135	HiFi
dairy-flye.metabat2.472.contigs	d__Bacteria;p__Bacillota_A;c__Clostridia;o__Saccharofermentanales;f__Saccharofermentanaceae;g__Firm-16;s__Firm-16 sp017428545	HiFi
dairy-flye.metabat2.477.contigs	d__Bacteria;p__Bacteroidota;c__Bacteroidia;o__Bacteroidales;f__Bacteroidaceae;g__UBA4372;s__UBA4372 sp902779845	HiFi
dairy-flye.metabat2.486.contigs	d__Bacteria;p__Bacillota_A;c__Clostridia;o__Lachnospirales;f__Lachnospiraceae;g__Eubacterium_Q;s__Eubacterium_Q sp900316715	HiFi
dairy-flye.metabat2.512.contigs	d__Bacteria;p__Bacteroidota;c__Bacteroidia;o__Bacteroidales;f__Bacteroidaceae;g__Prevotella;s__Prevotella ruminicola	HiFi
dairy-flye.metabat2.514.contigs	d__Bacteria;p__Bacillota_A;c__Clostridia;o__Oscillospirales;f__Oscillospiraceae;g__UBA2922;s__UBA2922 sp902802565	HiFi
dairy-flye.metabat2.551.contigs	d__Bacteria;p__Bacteroidota;c__Bacteroidia;o__Bacteroidales;f__WCHB1-69;g__RUG11690;s__RUG11690 sp017525505	HiFi
dairy-flye.metabat2.574.contigs	d__Bacteria;p__Bacteroidota;c__Bacteroidia;o__Bacteroidales;f__Bacteroidaceae;g__Prevotella;s__Prevotella sp902800585	HiFi
dairy-flye.metabat2.580.contigs	d__Bacteria;p__Bacteroidota;c__Bacteroidia;o__Bacteroidales;f__UBA932;g__Cryptobacteroides;s__Cryptobacteroides sp902790635	HiFi
dairy-flye.metabat2.589.contigs	d__Bacteria;p__Bacillota_A;c__Clostridia;o__Lachnospirales;f__Lachnospiraceae;g__UBA3766;s__UBA3766 sp902803015	HiFi
dairy-flye.metabat2.794.contigs	d__Bacteria;p__Pseudomonadota;c__Alphaproteobacteria;o__Rs-D84;f__Rs-D84;g__Enterousia;s__	HiFi
dairy-flye.metabat2.803.contigs	d__Bacteria;p__Bacillota;c__Bacilli;o__RF39;f__UBA660;g__UBA3789;s__	HiFi
dairy-flye.metabat2.827.contigs	d__Bacteria;p__Bacillota;c__Bacilli;o__RFN20;f__CAG-288;g__Enterosoma;s__Enterosoma sp900313465	HiFi
dairy-hifi.maxbin.064.contigs	d__Bacteria;p__Pseudomonadota;c__Alphaproteobacteria;o__Rs-D84;f__Rs-D84;g__Enterousia;s__	HiFi
dairy-hifi.maxbin.137.contigs	d__Bacteria;p__Bacillota_A;c__Clostridia;o__Lachnospirales;f__Lachnospiraceae;g__UBA1258;s__	HiFi
dairy-hifi.metabat2.1126.contigs	d__Bacteria;p__Patescibacteria;c__Saccharimonadia;o__Saccharimonadales;f__Nanosyncoccaceae;g__Nanosyncoccus;s__	HiFi
dairy-hifi.metabat2.1190.contigs	d__Bacteria;p__Bacteroidota;c__Bacteroidia;o__Bacteroidales;f__P3;g__CAJOQB01;s__CAJOQB01 sp905236405	HiFi
dairy-hifi.metabat2.1285.contigs	d__Bacteria;p__Bacillota_A;c__Clostridia;o__Lachnospirales;f__Lachnospiraceae;g__Eubacterium_Q;s__	HiFi
dairy-hifi.metabat2.1416.contigs	d__Bacteria;p__Bacteroidota;c__Bacteroidia;o__Bacteroidales;f__F082;g__Limimorpha;s__Limimorpha sp902787095	HiFi
dairy-hifi.metabat2.247.contigs	d__Bacteria;p__Bacillota;c__Bacilli;o__RF39;f__UBA660;g__UBA3789;s__	HiFi
dairy-hifi.metabat2.361.contigs	d__Bacteria;p__Fibrobacterota;c__Fibrobacteria;o__Fibrobacterales;f__Fibrobacteraceae;g__Fibrobacter;s__Fibrobacter succinogenes_C	HiFi
dairy-hifi.metabat2.444.contigs	d__Bacteria;p__Verrucomicrobiota;c__Kiritimatiellia;o__RFP12;f__UBA1067;g__UBA1067;s__	HiFi
dairy-hifi.metabat2.491.contigs	d__Bacteria;p__Bacteroidota;c__Bacteroidia;o__Bacteroidales;f__UBA932;g__Cryptobacteroides;s__	HiFi
dairy-hifi.metabat2.564.contigs	d__Bacteria;p__Bacteroidota;c__Bacteroidia;o__Bacteroidales;f__WCHB1-69;g__RUG11690;s__RUG11690 sp017525505	HiFi
dairy-hifi.metabat2.612_sub.contigs	d__Bacteria;p__Pseudomonadota;c__Alphaproteobacteria;o__Rs-D84;f__Rs-D84;g__Enterousia;s__	HiFi
dairy-hifi.metabat2.640.contigs	d__Bacteria;p__Bacillota_A;c__Clostridia;o__Oscillospirales;f__Acutalibacteraceae;g__Ruminococcus_E;s__	HiFi
dairy-hifi.metabat2.727.contigs	d__Bacteria;p__Bacteroidota;c__Bacteroidia;o__Bacteroidales;f__Bacteroidaceae;g__Prevotella;s__Prevotella sp017478025	HiFi
dairy-hifi.metabat2.770.contigs	d__Bacteria;p__Bacillota;c__Bacilli;o__RF39;f__UBA660;g__UBA3789;s__	HiFi
dairy-hifi.metabat2.790.contigs	d__Bacteria;p__Bacteroidota;c__Bacteroidia;o__Bacteroidales;f__UBA932;g__Cryptobacteroides;s__	HiFi
dairy-hifi.metabat2.924.contigs	d__Bacteria;p__Bacteroidota;c__Bacteroidia;o__Bacteroidales;f__WCHB1-69;g__UBA1756;s__UBA1756 sp017535665	HiFi
goat-flye.concoct.004_sub.contigs	d__Bacteria;p__Bacillota_A;c__Clostridia;o__Oscillospirales;f__Oscillospiraceae;g__Dysosmobacter;s__Dysosmobacter sp017446225	HiFi
goat-flye.concoct.024_sub.contigs	d__Bacteria;p__Bacillota;c__Bacilli;o__Mycoplasmatales;f__Mycoplasmoidaceae;g__RUG11194;s__RUG11194 sp017445805	HiFi
goat-flye.concoct.032.contigs	d__Bacteria;p__Bacteroidota;c__Bacteroidia;o__Bacteroidales;f__Paludibacteraceae;g__Enterocola;s__Enterocola sp900316995	HiFi
goat-flye.concoct.039_sub.contigs	d__Bacteria;p__Planctomycetota;c__Planctomycetia;o__Pirellulales;f__Thermoguttaceae;g__RGIG3701;s__RGIG3701 sp017447865	HiFi
goat-flye.concoct.046_sub.contigs	d__Bacteria;p__Bacillota_A;c__Clostridia;o__Christensenellales;f__CAG-1252;g__CAG-1252;s__CAG-1252 sp017455385	HiFi
goat-flye.concoct.063.contigs	d__Bacteria;p__Bacillota_A;c__Clostridia;o__Oscillospirales;f__Oscillospiraceae;g__Dysosmobacter;s__	HiFi
goat-flye.concoct.078.contigs	d__Bacteria;p__Desulfobacterota;c__Desulfovibrionia;o__Desulfovibrionales;f__Desulfovibrionaceae;g__Desulfovibrio;s__Desulfovibrio sp017454005	HiFi
goat-flye.concoct.093_sub.contigs	d__Bacteria;p__Bacteroidota;c__Kapabacteria;o__Kapabacteriales;f__UBA2268;g__JAAYTD01;s__JAAYTD01 sp017428585	HiFi
goat-flye.concoct.108.contigs	d__Bacteria;p__Armatimonadota;c__UBA5829;o__UBA5829;f__UBA5829;g__RGIG7931;s__	HiFi
goat-flye.maxbin.001.contigs	d__Bacteria;p__Bacteroidota;c__Bacteroidia;o__Bacteroidales;f__Bacteroidaceae;g__Prevotella;s__Prevotella sp900318555	HiFi
goat-flye.maxbin.002.contigs	d__Bacteria;p__Bacillota;c__Bacilli;o__Mycoplasmatales;f__Mycoplasmoidaceae;g__Malacoplasma_A;s__Malacoplasma_A sp902800015	HiFi
goat-flye.maxbin.003.contigs	d__Bacteria;p__Bacteroidota;c__Bacteroidia;o__Bacteroidales;f__P3;g__UBA1217;s__UBA1217 sp017446745	HiFi
goat-flye.maxbin.004.contigs	d__Bacteria;p__Bacteroidota;c__Bacteroidia;o__Bacteroidales;f__F082;g__Limimorpha;s__Limimorpha sp017427985	HiFi
goat-flye.maxbin.006.contigs	d__Bacteria;p__Bacteroidota;c__Bacteroidia;o__Bacteroidales;f__UBA932;g__Bact-11;s__Bact-11 sp017447265	HiFi
goat-flye.maxbin.007.contigs	d__Bacteria;p__Bacillota_C;c__Negativicutes;o__Selenomonadales;f__Selenomonadaceae;g__Quinella;s__Quinella sp017428215	HiFi
goat-flye.maxbin.008_sub.contigs	d__Bacteria;p__Bacteroidota;c__Bacteroidia;o__Bacteroidales;f__Bacteroidaceae;g__Prevotella;s__	HiFi
goat-flye.maxbin.014.contigs	d__Bacteria;p__Bacillota_A;c__Clostridia;o__Christensenellales;f__CAG-138;g__RUG472;s__RUG472 sp902802575	HiFi
goat-flye.maxbin.015.contigs	d__Bacteria;p__Verrucomicrobiota;c__Kiritimatiellia;o__LD1-PB3_B;f__Lenti-01;g__RGIG3636;s__RGIG3636 sp017458625	HiFi
goat-flye.maxbin.017.contigs	d__Bacteria;p__Bacteroidota;c__Bacteroidia;o__Bacteroidales;f__WCHB1-69;g__F23-D06;s__F23-D06 sp002392325	HiFi
goat-flye.maxbin.018.contigs	d__Bacteria;p__Bacillota_A;c__Clostridia;o__Oscillospirales;f__Oscillospiraceae;g__Faecousia;s__Faecousia sp017405865	HiFi
goat-flye.maxbin.020.contigs	d__Bacteria;p__Bacillota_A;c__Clostridia;o__Christensenellales;f__CAG-74;g__RUG563;s__	HiFi
goat-flye.maxbin.021.contigs	d__Bacteria;p__Bacteroidota;c__Bacteroidia;o__Bacteroidales;f__Paludibacteraceae;g__RF16;s__RF16 sp902774185	HiFi
goat-flye.maxbin.025.contigs	d__Bacteria;p__Bacteroidota;c__Bacteroidia;o__Bacteroidales;f__F082;g__Limimorpha;s__Limimorpha sp002310075	HiFi
goat-flye.maxbin.026.contigs	d__Bacteria;p__Patescibacteria;c__Saccharimonadia;o__Saccharimonadales;f__Nanosyncoccaceae;g__Nanosyncoccus;s__Nanosyncoccus sp017447485	HiFi
goat-flye.maxbin.027.contigs	d__Bacteria;p__Bacillota_A;c__Clostridia;o__Oscillospirales;f__Oscillospiraceae;g__Limivicinus;s__Limivicinus sp900316255	HiFi
goat-flye.maxbin.028.contigs	d__Bacteria;p__Bacteroidota;c__Bacteroidia;o__Bacteroidales;f__F082;g__Limimorpha;s__Limimorpha sp017649945	HiFi
goat-flye.maxbin.029.contigs	d__Bacteria;p__Planctomycetota;c__Planctomycetia;o__Pirellulales;f__Thermoguttaceae;g__RUG11551;s__RUG11551 sp017447745	HiFi
goat-flye.maxbin.030.contigs	d__Bacteria;p__Bacillota_A;c__Clostridia;o__Oscillospirales;f__Oscillospiraceae;g__Limivicinus;s__	HiFi
goat-flye.maxbin.031.contigs	d__Bacteria;p__Bacillota_A;c__Clostridia;o__Oscillospirales;f__Oscillospiraceae;g__Vescimonas;s__Vescimonas sp017412585	HiFi
goat-flye.maxbin.034.contigs	d__Bacteria;p__Patescibacteria;c__Saccharimonadia;o__Saccharimonadales;f__Nanosyncoccaceae;g__Nanosyncoccus;s__Nanosyncoccus sp017432305	HiFi
goat-flye.maxbin.036.contigs	d__Bacteria;p__Verrucomicrobiota;c__Kiritimatiellia;o__RFP12;f__UBA1067;g__UBA1067;s__UBA1067 sp017447805	HiFi
goat-flye.maxbin.037.contigs	d__Bacteria;p__Patescibacteria;c__JAEDAM01;o__Absconditabacterales;f__Absconditicoccaceae;g__HOT-345;s__	HiFi
goat-flye.maxbin.038.contigs	d__Bacteria;p__Patescibacteria;c__Saccharimonadia;o__Saccharimonadales;f__Nanosyncoccaceae;g__Nanosyncoccus;s__Nanosyncoccus sp017406565	HiFi
goat-flye.maxbin.041.contigs	d__Bacteria;p__Bacillota;c__Bacilli;o__Erysipelotrichales;f__Erysipelotrichaceae;g__UBA636;s__UBA636 sp017404785	HiFi
goat-flye.maxbin.042.contigs	d__Bacteria;p__Bacillota;c__Bacilli;o__Mycoplasmatales;f__Mycoplasmoidaceae;g__RUG11194;s__RUG11194 sp017445805	HiFi
goat-flye.maxbin.044.contigs	d__Bacteria;p__Bacteroidota;c__Bacteroidia;o__Bacteroidales;f__UBA932;g__RUG11257;s__RUG11257 sp017446775	HiFi
goat-flye.maxbin.045.contigs	d__Bacteria;p__Bacteroidota;c__Bacteroidia;o__Bacteroidales;f__UBA932;g__Cryptobacteroides;s__Cryptobacteroides sp017447815	HiFi
goat-flye.maxbin.046.contigs	d__Bacteria;p__Bacillota_A;c__Clostridia;o__Oscillospirales;f__CAG-272;g__RGIG6816;s__RGIG6816 sp017447775	HiFi
goat-flye.maxbin.047.contigs	d__Bacteria;p__Bacillota_A;c__Clostridia;o__TANB77;f__CAG-508;g__CAG-269;s__CAG-269 sp017404025	HiFi
goat-flye.maxbin.049.contigs	d__Bacteria;p__Bacillota_A;c__Clostridia;o__Oscillospirales;f__Acutalibacteraceae;g__Ruminococcus_E;s__Ruminococcus_E sp017403985	HiFi
goat-flye.maxbin.050.contigs	d__Bacteria;p__Bacillota;c__Bacilli;o__Mycoplasmatales;f__Mycoplasmoidaceae;g__RUG11194;s__RUG11194 sp017448105	HiFi
goat-flye.maxbin.051.contigs	d__Bacteria;p__Bacillota_A;c__Clostridia;o__Oscillospirales;f__Ruminococcaceae;g__RGIG1955;s__RGIG1955 sp017414435	HiFi
goat-flye.maxbin.052.contigs	d__Archaea;p__Methanobacteriota;c__Methanobacteria;o__Methanobacteriales;f__Methanobacteriaceae;g__Methanobrevibacter_A;s__Methanobrevibacter_A sp017409525	HiFi
goat-flye.maxbin.053.contigs	d__Bacteria;p__Bacillota;c__Bacilli;o__RFN20;f__CAG-826;g__RUG13091;s__	HiFi
goat-flye.maxbin.054.contigs	d__Bacteria;p__Bacteroidota;c__Bacteroidia;o__Bacteroidales;f__UBA932;g__Bact-11;s__Bact-11 sp017509755	HiFi
goat-flye.maxbin.058.contigs	d__Bacteria;p__Bacillota_A;c__Clostridia;o__Oscillospirales;f__CAG-382;g__UBA1752;s__UBA1752 sp017447445	HiFi
goat-flye.maxbin.060.contigs	d__Bacteria;p__Bacteroidota;c__Bacteroidia;o__Bacteroidales;f__UBA932;g__Cryptobacteroides;s__Cryptobacteroides sp900319685	HiFi
goat-flye.maxbin.062.contigs	d__Bacteria;p__Planctomycetota;c__Planctomycetia;o__Pirellulales;f__Thermoguttaceae;g__RUG11551;s__RUG11551 sp017407125	HiFi
goat-flye.maxbin.063.contigs	d__Bacteria;p__Bacillota;c__Bacilli;o__Erysipelotrichales;f__Erysipelotrichaceae;g__UBA636;s__UBA636 sp017432005	HiFi
goat-flye.maxbin.064.contigs	d__Bacteria;p__Bacillota;c__Bacilli;o__Mycoplasmatales;f__Mycoplasmoidaceae;g__Malacoplasma_A;s__Malacoplasma_A sp902791895	HiFi
goat-flye.maxbin.065.contigs	d__Bacteria;p__Patescibacteria;c__Saccharimonadia;o__Saccharimonadales;f__Nanosyncoccaceae;g__Nanosyncoccus;s__	HiFi
goat-flye.maxbin.067.contigs	d__Bacteria;p__Synergistota;c__Synergistia;o__Synergistales;f__Aminobacteriaceae;g__JAFUXM01;s__JAFUXM01 sp017405525	HiFi
goat-flye.maxbin.068.contigs	d__Bacteria;p__Bacillota;c__Bacilli;o__RF39;f__UBA660;g__RUG12783;s__	HiFi
goat-flye.maxbin.069.contigs	d__Archaea;p__Methanobacteriota;c__Methanobacteria;o__Methanobacteriales;f__Methanobacteriaceae;g__Methanobrevibacter_A;s__Methanobrevibacter_A sp900319535	HiFi
goat-flye.maxbin.070.contigs	d__Bacteria;p__Bacillota_A;c__Clostridia;o__Oscillospirales;f__Oscillospiraceae;g__Faecousia;s__Faecousia sp017429325	HiFi
goat-flye.maxbin.072.contigs	d__Bacteria;p__Armatimonadota;c__UBA5829;o__UBA5829;f__UBA5829;g__RGIG7931;s__RGIG7931 sp017445025	HiFi
goat-flye.maxbin.074.contigs	d__Bacteria;p__Bacillota_A;c__Clostridia;o__Oscillospirales;f__CAG-272;g__UBA11512;s__UBA11512 sp017454525	HiFi
goat-flye.maxbin.075.contigs	d__Bacteria;p__Bacteroidota;c__Bacteroidia;o__Bacteroidales;f__UBA932;g__Bact-11;s__Bact-11 sp017428245	HiFi
goat-flye.maxbin.077.contigs	d__Bacteria;p__Bacillota_A;c__Clostridia;o__Oscillospirales;f__CAG-272;g__RUG11130;s__RUG11130 sp017428635	HiFi
goat-flye.maxbin.080.contigs	d__Bacteria;p__Pseudomonadota;c__Alphaproteobacteria;o__Rs-D84;f__Rs-D84;g__Enterousia;s__Enterousia sp017427715	HiFi
goat-flye.maxbin.081.contigs	d__Bacteria;p__Bacillota_A;c__Clostridia;o__Christensenellales;f__CAG-138;g__UBA3792;s__UBA3792 sp900318765	HiFi
goat-flye.maxbin.084.contigs	d__Bacteria;p__Bacillota_A;c__Clostridia;o__Oscillospirales;f__Acutalibacteraceae;g__Eubacterium_R;s__Eubacterium_R sp017450645	HiFi
goat-flye.maxbin.085.contigs	d__Bacteria;p__Bacillota;c__Bacilli;o__Erysipelotrichales;f__Erysipelotrichaceae;g__UBA636;s__UBA636 sp017454765	HiFi
goat-flye.maxbin.090.contigs	d__Bacteria;p__Chloroflexota;c__Anaerolineae;o__Anaerolineales;f__Anaerolineaceae;g__Flexilinea;s__Flexilinea sp017432685	HiFi
goat-flye.maxbin.091.contigs	d__Bacteria;p__Bacillota_A;c__Clostridia;o__UBA1381;f__UBA1381;g__Ornithomonoglobus;s__Ornithomonoglobus sp017404065	HiFi
goat-flye.maxbin.093.contigs	d__Bacteria;p__Bacillota_A;c__Clostridia;o__Lachnospirales;f__Lachnospiraceae;g__RUG306;s__RUG306 sp902772635	HiFi
goat-flye.maxbin.094.contigs	d__Bacteria;p__Bacillota;c__Bacilli;o__ML615J-28;f__CAG-698;g__CAG-698;s__	HiFi
goat-flye.maxbin.095.contigs	d__Archaea;p__Methanobacteriota;c__Methanobacteria;o__Methanobacteriales;f__Methanobacteriaceae;g__Methanobrevibacter_A;s__Methanobrevibacter_A sp017427765	HiFi
goat-flye.maxbin.101.contigs	d__Bacteria;p__Patescibacteria;c__Saccharimonadia;o__Saccharimonadales;f__Nanosyncoccaceae;g__Nanosyncoccus;s__	HiFi
goat-flye.maxbin.103.contigs	d__Bacteria;p__Bacillota_A;c__Clostridia;o__Christensenellales;f__CAG-138;g__UBA3792;s__UBA3792 sp017428025	HiFi
goat-flye.maxbin.104.contigs	d__Bacteria;p__Bacteroidota;c__Bacteroidia;o__Bacteroidales;f__Muribaculaceae;g__Sodaliphilus;s__Sodaliphilus sp017443765	HiFi
goat-flye.maxbin.108.contigs	d__Bacteria;p__Bacillota_A;c__Clostridia;o__Christensenellales;f__CAG-1252;g__RUG14300;s__RUG14300 sp017444385	HiFi
goat-flye.maxbin.109.contigs	d__Bacteria;p__Patescibacteria;c__Saccharimonadia;o__Saccharimonadales;f__Nanosyncoccaceae;g__Nanosyncoccus;s__Nanosyncoccus sp017405265	HiFi
goat-flye.maxbin.110.contigs	d__Bacteria;p__Patescibacteria;c__Saccharimonadia;o__Saccharimonadales;f__Nanosyncoccaceae;g__Nanosyncoccus;s__Nanosyncoccus sp017432425	HiFi
goat-flye.maxbin.117.contigs	d__Bacteria;p__Bacillota;c__Bacilli;o__Erysipelotrichales;f__Erysipelotrichaceae;g__RUG521;s__RUG521 sp017405785	HiFi
goat-flye.maxbin.118.contigs	d__Bacteria;p__Patescibacteria;c__Microgenomatia;o__UBA1400;f__PJMF01;g__RGIG2560;s__RGIG2560 sp017431625	HiFi
goat-flye.maxbin.122.contigs	d__Bacteria;p__Planctomycetota;c__Planctomycetia;o__Pirellulales;f__Thermoguttaceae;g__RGIG3701;s__	HiFi
goat-flye.maxbin.126.contigs	d__Bacteria;p__Pseudomonadota;c__Alphaproteobacteria;o__RUG11792;f__RUG11792;g__RUG11792;s__RUG11792 sp902772645	HiFi
goat-flye.maxbin.129.contigs	d__Bacteria;p__Patescibacteria;c__JAEDAM01;o__Absconditabacterales;f__Absconditicoccaceae;g__UBA3291;s__	HiFi
goat-flye.maxbin.130.contigs	d__Bacteria;p__Bacillota_A;c__Clostridia;o__Oscillospirales;f__Acutalibacteraceae;g__CAG-177;s__CAG-177 sp017428625	HiFi
goat-flye.maxbin.134.contigs	d__Bacteria;p__Bacillota_A;c__Clostridia;o__Christensenellales;f__CAG-74;g__UBA2862;s__UBA2862 sp017432405	HiFi
goat-flye.maxbin.146_sub.contigs	d__Bacteria;p__Bacillota_A;c__Clostridia;o__Oscillospirales;f__Oscillospiraceae;g__Dysosmobacter;s__	HiFi
goat-flye.maxbin.179.contigs	d__Bacteria;p__Bacillota_A;c__Clostridia;o__Christensenellales;f__UBA1242;g__UMGS2070;s__UMGS2070 sp017443885	HiFi
goat-flye.maxbin.190.contigs	d__Bacteria;p__Bacillota_A;c__Clostridia;o__Peptostreptococcales;f__Anaerovoracaceae;g__Eubacterium_B;s__Eubacterium_B sp017445315	HiFi
goat-flye.maxbin.203_sub.contigs	d__Bacteria;p__Patescibacteria;c__Saccharimonadia;o__Saccharimonadales;f__Nanosyncoccaceae;g__Nanosyncoccus;s__	HiFi
goat-flye.maxbin.222.contigs	d__Bacteria;p__Eremiobacterota;c__Xenobia;o__Xenobiales;f__Xenobiaceae;g__RGIG3641;s__RGIG3641 sp017458675	HiFi
goat-flye.maxbin.233_sub.contigs	d__Bacteria;p__Bacteroidota;c__Bacteroidia;o__Bacteroidales;f__P3;g__Phil12;s__Phil12 sp900314725	HiFi
goat-flye.maxbin.237.contigs	d__Archaea;p__Methanobacteriota;c__Methanobacteria;o__Methanobacteriales;f__Methanobacteriaceae;g__UBA412;s__	HiFi
goat-flye.maxbin.244.contigs	d__Bacteria;p__Bacillota_A;c__Clostridia;o__Oscillospirales;f__CAG-272;g__UMGS1865;s__UMGS1865 sp017450945	HiFi
goat-flye.metabat2.001.contigs	d__Bacteria;p__Bacteroidota;c__Bacteroidia;o__Bacteroidales;f__WCHB1-69;g__F23-D06;s__F23-D06 sp905235135	HiFi
goat-flye.metabat2.002.contigs	d__Bacteria;p__Bacteroidota;c__Bacteroidia;o__Bacteroidales;f__UBA932;g__Cryptobacteroides;s__Cryptobacteroides sp017454265	HiFi
goat-flye.metabat2.004.contigs	d__Bacteria;p__Bacteroidota;c__Bacteroidia;o__Bacteroidales;f__P3;g__UBA1711;s__UBA1711 sp902774845	HiFi
goat-flye.metabat2.010.contigs	d__Bacteria;p__Bacteroidota;c__Bacteroidia;o__Bacteroidales;f__F082;g__Limimorpha;s__	HiFi
goat-flye.metabat2.011.contigs	d__Bacteria;p__Bacteroidota;c__Bacteroidia;o__Bacteroidales;f__Bacteroidaceae;g__UBA4334;s__UBA4334 sp017448965	HiFi
goat-flye.metabat2.013.contigs	d__Bacteria;p__Bacillota_A;c__Clostridia;o__Christensenellales;f__CAG-1252;g__RUG14300;s__RUG14300 sp017394805	HiFi
goat-flye.metabat2.022_sub.contigs	d__Bacteria;p__Bacteroidota;c__Bacteroidia;o__Bacteroidales;f__Paludibacteraceae;g__RF16;s__RF16 sp017447875	HiFi
goat-flye.metabat2.025.contigs	d__Bacteria;p__Bacteroidota;c__Bacteroidia;o__Bacteroidales;f__Paludibacteraceae;g__RF16;s__RF16 sp017964045	HiFi
goat-flye.metabat2.056.contigs	d__Bacteria;p__Bacillota;c__Bacilli;o__Erysipelotrichales;f__Erysipelotrichaceae;g__Bulleidia;s__Bulleidia sp017432325	HiFi
goat-flye.metabat2.057_sub.contigs	d__Bacteria;p__Bacillota;c__Bacilli;o__RFN20;f__CAG-826;g__RUG13091;s__RUG13091 sp017429285	HiFi
goat-flye.metabat2.059.contigs	d__Bacteria;p__Bacteroidota;c__Bacteroidia;o__Bacteroidales;f__UBA932;g__RUG11257;s__RUG11257 sp017429475	HiFi
goat-flye.metabat2.061.contigs	d__Bacteria;p__Bacillota_A;c__Clostridia;o__Lachnospirales;f__Lachnospiraceae;g__NK4A144;s__NK4A144 sp017448845	HiFi
goat-flye.metabat2.062.contigs	d__Bacteria;p__Bacillota_A;c__Clostridia;o__Oscillospirales;f__Acutalibacteraceae;g__SIG575;s__SIG575 sp017445685	HiFi
goat-flye.metabat2.069.contigs	d__Bacteria;p__Bacteroidota;c__Bacteroidia;o__Bacteroidales;f__Paludibacteraceae;g__RF16;s__RF16 sp900316005	HiFi
goat-flye.metabat2.073.contigs	d__Bacteria;p__Bacteroidota;c__Bacteroidia;o__Bacteroidales;f__Bacteroidaceae;g__Prevotella;s__Prevotella sp900319305	HiFi
goat-flye.metabat2.077.contigs	d__Bacteria;p__Bacteroidota;c__Bacteroidia;o__Bacteroidales;f__Bacteroidaceae;g__Prevotella;s__	HiFi
goat-flye.metabat2.080.contigs	d__Bacteria;p__Bacillota_A;c__Clostridia;o__Saccharofermentanales;f__Saccharofermentanaceae;g__Saccharofermentans;s__Saccharofermentans sp017451265	HiFi
goat-flye.metabat2.083.contigs	d__Bacteria;p__Bacteroidota;c__Bacteroidia;o__Bacteroidales;f__Paludibacteraceae;g__RF16;s__RF16 sp017450435	HiFi
goat-flye.metabat2.086.contigs	d__Bacteria;p__Bacteroidota;c__Bacteroidia;o__Bacteroidales;f__Bacteroidaceae;g__Prevotella;s__Prevotella ruminicola_D	HiFi
goat-flye.metabat2.089.contigs	d__Bacteria;p__Bacillota_A;c__Clostridia;o__Oscillospirales;f__Oscillospiraceae;g__Limivicinus;s__Limivicinus sp017428565	HiFi
goat-flye.metabat2.090.contigs	d__Bacteria;p__Bacillota;c__Bacilli;o__RFN20;f__CAG-826;g__RUG14515;s__RUG14515 sp017442875	HiFi
goat-flye.metabat2.095.contigs	d__Bacteria;p__Bacteroidota;c__Bacteroidia;o__Bacteroidales;f__Bacteroidaceae;g__Prevotella;s__Prevotella sp017447515	HiFi
goat-flye.metabat2.096.contigs	d__Bacteria;p__Bacillota;c__Bacilli;o__Erysipelotrichales;f__Erysipelotrichaceae;g__UBA636;s__UBA636 sp017404205	HiFi
goat-flye.metabat2.100.contigs	d__Bacteria;p__Bacteroidota;c__Bacteroidia;o__Bacteroidales;f__P3;g__RGIG10147;s__RGIG10147 sp017454015	HiFi
goat-flye.metabat2.107.contigs	d__Bacteria;p__Bacillota;c__Bacilli;o__RF39;f__UBA660;g__RGIG2361;s__	HiFi
goat-flye.metabat2.108.contigs	d__Bacteria;p__Bacteroidota;c__Bacteroidia;o__Bacteroidales;f__P3;g__UBA1711;s__UBA1711 sp900316235	HiFi
goat-flye.metabat2.109.contigs	d__Bacteria;p__Bacteroidota;c__Bacteroidia;o__Bacteroidales;f__Bacteroidaceae;g__UBA2918;s__UBA2918 sp017442855	HiFi
goat-flye.metabat2.110.contigs	d__Bacteria;p__Bacteroidota;c__Bacteroidia;o__Bacteroidales;f__P3;g__UBA1711;s__UBA1711 sp017448185	HiFi
goat-flye.metabat2.112_sub.contigs	d__Bacteria;p__Bacillota;c__Bacilli;o__RF39;f__UBA660;g__UBA3789;s__UBA3789 sp902793315	HiFi
goat-flye.metabat2.119.contigs	d__Bacteria;p__Patescibacteria;c__Saccharimonadia;o__Saccharimonadales;f__Nanosyncoccaceae;g__Nanosyncoccus;s__	HiFi
goat-flye.metabat2.128.contigs	d__Bacteria;p__Bacillota_A;c__Clostridia;o__Oscillospirales;f__Oscillospiraceae;g__Limivicinus;s__Limivicinus sp017447645	HiFi
goat-flye.metabat2.133.contigs	d__Bacteria;p__Bacteroidota;c__Bacteroidia;o__Bacteroidales;f__UBA932;g__Bact-11;s__Bact-11 sp017430365	HiFi
goat-flye.metabat2.136.contigs	d__Bacteria;p__Bacillota_A;c__Clostridia;o__Oscillospirales;f__Oscillospiraceae;g__Limivicinus;s__Limivicinus sp017403885	HiFi
goat-flye.metabat2.138.contigs	d__Bacteria;p__Bacteroidota;c__Bacteroidia;o__Bacteroidales;f__Bacteroidaceae;g__UBA4372;s__UBA4372 sp017427185	HiFi
goat-flye.metabat2.140.contigs	d__Bacteria;p__Synergistota;c__Synergistia;o__Synergistales;f__Aminobacteriaceae;g__JAFUXM01;s__JAFUXM01 sp017443945	HiFi
goat-flye.metabat2.143.contigs	d__Bacteria;p__Bacillota_A;c__Clostridia;o__Oscillospirales;f__Acutalibacteraceae;g__RUG806;s__RUG806 sp017443805	HiFi
goat-flye.metabat2.144.contigs	d__Bacteria;p__Bacillota_A;c__Clostridia;o__Saccharofermentanales;f__Saccharofermentanaceae;g__Saccharofermentans;s__Saccharofermentans sp017428155	HiFi
goat-flye.metabat2.147.contigs	d__Bacteria;p__Synergistota;c__Synergistia;o__Synergistales;f__Aminobacteriaceae;g__JAFUXM01;s__JAFUXM01 sp905233215	HiFi
goat-flye.metabat2.161.contigs	d__Bacteria;p__Pseudomonadota;c__Alphaproteobacteria;o__UBA3830;f__UBA3830;g__;s__	HiFi
goat-flye.metabat2.163.contigs	d__Bacteria;p__Bacteroidota;c__Bacteroidia;o__Bacteroidales;f__Bacteroidaceae;g__Prevotella;s__	HiFi
goat-flye.metabat2.166.contigs	d__Bacteria;p__Chloroflexota;c__Anaerolineae;o__Anaerolineales;f__Anaerolineaceae;g__Flexilinea;s__Flexilinea sp017417055	HiFi
goat-flye.metabat2.173_sub.contigs	d__Bacteria;p__Pseudomonadota;c__Alphaproteobacteria;o__UBA3830;f__UBA3830;g__CADBNZ01;s__CADBNZ01 sp905233775	HiFi
goat-flye.metabat2.180.contigs	d__Bacteria;p__Bacillota_A;c__Clostridia;o__Lachnospirales;f__Lachnospiraceae;g__Eubacterium_G;s__	HiFi
goat-flye.metabat2.182.contigs	d__Bacteria;p__Bacillota_A;c__Clostridia;o__Peptostreptococcales;f__Anaerovoracaceae;g__RUG13409;s__RUG13409 sp017437745	HiFi
goat-flye.metabat2.197.contigs	d__Bacteria;p__Bacteroidota;c__Bacteroidia;o__Bacteroidales;f__Bacteroidaceae;g__UBA4334;s__UBA4334 sp902800305	HiFi
goat-flye.metabat2.203.contigs	d__Bacteria;p__Bacillota_A;c__Clostridia;o__Christensenellales;f__CAG-74;g__Ventricola;s__Ventricola sp017458865	HiFi
goat-flye.metabat2.207.contigs	d__Bacteria;p__Bacillota;c__Bacilli;o__Erysipelotrichales;f__Erysipelotrichaceae;g__UBA636;s__UBA636 sp017432545	HiFi
goat-flye.metabat2.209.contigs	d__Bacteria;p__Bacteroidota;c__Bacteroidia;o__Bacteroidales;f__P3;g__UBA1711;s__UBA1711 sp900318665	HiFi
goat-flye.metabat2.210.contigs	d__Bacteria;p__Synergistota;c__Synergistia;o__Synergistales;f__Aminobacteriaceae;g__JAFUXM01;s__JAFUXM01 sp017427625	HiFi
goat-flye.metabat2.212.contigs	d__Bacteria;p__Bacteroidota;c__Bacteroidia;o__Bacteroidales;f__P3;g__UBA1711;s__UBA1711 sp002372855	HiFi
goat-flye.metabat2.227.contigs	d__Bacteria;p__Bacteroidota;c__Bacteroidia;o__Bacteroidales;f__WCHB1-69;g__UBA1195;s__UBA1195 sp902774175	HiFi
goat-flye.metabat2.236.contigs	d__Bacteria;p__Bacteroidota;c__Bacteroidia;o__Bacteroidales;f__Paludibacteraceae;g__RF16;s__RF16 sp017443145	HiFi
goat-flye.metabat2.244.contigs	d__Bacteria;p__Bacteroidota;c__Bacteroidia;o__Bacteroidales;f__Paludibacteraceae;g__RF16;s__	HiFi
goat-flye.metabat2.247.contigs	d__Bacteria;p__Bacteroidota;c__Bacteroidia;o__Bacteroidales;f__ML635J-15;g__Bact-19;s__Bact-19 sp902762455	HiFi
goat-flye.metabat2.248_sub.contigs	d__Bacteria;p__Bacillota;c__Bacilli;o__RFN20;f__CAG-826;g__UBA3207;s__UBA3207 sp017447725	HiFi
goat-flye.metabat2.259.contigs	d__Bacteria;p__Bacteroidota;c__Bacteroidia;o__Bacteroidales;f__UBA932;g__RUG11257;s__RUG11257 sp017450655	HiFi
goat-flye.metabat2.266.contigs	d__Bacteria;p__Bacillota_A;c__Clostridia;o__Oscillospirales;f__CAG-272;g__UBA1248;s__UBA1248 sp017443595	HiFi
goat-flye.metabat2.276.contigs	d__Bacteria;p__Bacillota_A;c__Clostridia;o__Peptostreptococcales;f__Anaerovoracaceae;g__RUG754;s__	HiFi
goat-flye.metabat2.278.contigs	d__Bacteria;p__Bacteroidota;c__Bacteroidia;o__Bacteroidales;f__UBA932;g__Cryptobacteroides;s__Cryptobacteroides sp017454905	HiFi
goat-flye.metabat2.280.contigs	d__Bacteria;p__Desulfobacterota;c__Desulfovibrionia;o__Desulfovibrionales;f__Desulfovibrionaceae;g__Desulfovibrio;s__Desulfovibrio sp017528345	HiFi
goat-flye.metabat2.295.contigs	d__Bacteria;p__Bacteroidota;c__Bacteroidia;o__Bacteroidales;f__Paludibacteraceae;g__RF16;s__RF16 sp017417025	HiFi
goat-flye.metabat2.300.contigs	d__Bacteria;p__Bacteroidota;c__Bacteroidia;o__Bacteroidales;f__Bacteroidaceae;g__Prevotella;s__Prevotella ruminicola	HiFi
goat-flye.metabat2.304.contigs	d__Bacteria;p__Bacillota_A;c__Clostridia;o__Oscillospirales;f__Ruminococcaceae;g__RUG11783;s__RUG11783 sp017432285	HiFi
goat-flye.metabat2.306.contigs	d__Bacteria;p__Bacillota_A;c__Clostridia;o__Lachnospirales;f__Bianqueaceae;g__RUG12817;s__RUG12817 sp017441925	HiFi
goat-flye.metabat2.319.contigs	d__Bacteria;p__Bacteroidota;c__Bacteroidia;o__Bacteroidales;f__Bacteroidaceae;g__Prevotella;s__Prevotella sp900316285	HiFi
goat-flye.metabat2.321.contigs	d__Bacteria;p__Bacillota;c__Bacilli;o__RFN20;f__CAG-826;g__SIG220;s__	HiFi
goat-flye.metabat2.334.contigs	d__Bacteria;p__Bacillota_A;c__Clostridia;o__Lachnospirales;f__Lachnospiraceae;g__Avilachnospira;s__Avilachnospira sp017446045	HiFi
goat-flye.metabat2.337.contigs	d__Bacteria;p__Synergistota;c__Synergistia;o__Synergistales;f__Aminobacteriaceae;g__JAFUYV01;s__JAFUYV01 sp016280565	HiFi
goat-flye.metabat2.339.contigs	d__Bacteria;p__Bacteroidota;c__Bacteroidia;o__Bacteroidales;f__Bacteroidaceae;g__UBA4372;s__UBA4372 sp017444005	HiFi
goat-flye.metabat2.340.contigs	d__Bacteria;p__Bacteroidota;c__Bacteroidia;o__Bacteroidales;f__Bacteroidaceae;g__UBA4372;s__UBA4372 sp900318115	HiFi
goat-flye.metabat2.345.contigs	d__Bacteria;p__Patescibacteria;c__JAEDAM01;o__Absconditabacterales;f__Absconditicoccaceae;g__HOT-345;s__HOT-345 sp017453665	HiFi
goat-flye.metabat2.347.contigs	d__Bacteria;p__Synergistota;c__Synergistia;o__Synergistales;f__Aminobacteriaceae;g__JAFUXM01;s__JAFUXM01 sp017444345	HiFi
goat-flye.metabat2.348.contigs	d__Bacteria;p__Bacteroidota;c__Bacteroidia;o__Bacteroidales;f__UBA932;g__Cryptobacteroides;s__Cryptobacteroides sp902787255	HiFi
goat-flye.metabat2.357.contigs	d__Bacteria;p__Bacteroidota;c__Bacteroidia;o__Bacteroidales;f__UBA932;g__Cryptobacteroides;s__Cryptobacteroides sp017443025	HiFi
goat-flye.metabat2.358.contigs	d__Bacteria;p__Bacillota_A;c__Clostridia;o__Christensenellales;f__Borkfalkiaceae;g__UBA1259;s__	HiFi
goat-flye.metabat2.366.contigs	d__Bacteria;p__Bacteroidota;c__Bacteroidia;o__Bacteroidales;f__Bacteroidaceae;g__UBA4372;s__	HiFi
goat-flye.metabat2.370.contigs	d__Bacteria;p__Bacteroidota;c__Bacteroidia;o__Bacteroidales;f__UBA932;g__Cryptobacteroides;s__Cryptobacteroides sp017428945	HiFi
goat-flye.metabat2.373.contigs	d__Bacteria;p__Bacteroidota;c__Bacteroidia;o__Bacteroidales;f__UBA932;g__Egerieousia;s__Egerieousia sp017428325	HiFi
goat-flye.metabat2.374.contigs	d__Bacteria;p__Bacillota_A;c__Clostridia;o__Oscillospirales;f__Acutalibacteraceae;g__UBA1425;s__UBA1425 sp017449935	HiFi
goat-flye.metabat2.378.contigs	d__Bacteria;p__Bacillota_A;c__Clostridia;o__Oscillospirales;f__Acutalibacteraceae;g__CAG-177;s__CAG-177 sp017428525	HiFi
goat-flye.metabat2.388_sub.contigs	d__Bacteria;p__Bacillota_A;c__Clostridia;o__Lachnospirales;f__Lachnospiraceae;g__UBA2868;s__UBA2868 sp017458765	HiFi
goat-flye.metabat2.391.contigs	d__Bacteria;p__Bacillota_A;c__Clostridia;o__Oscillospirales;f__Oscillospiraceae;g__Limivicinus;s__	HiFi
goat-flye.metabat2.396.contigs	d__Bacteria;p__Bacillota_A;c__Clostridia;o__Oscillospirales;f__Oscillospiraceae;g__CAG-103;s__CAG-103 sp017411225	HiFi
goat-flye.metabat2.397.contigs	d__Bacteria;p__Bacillota_A;c__Clostridia;o__Oscillospirales;f__CAG-272;g__RGIG3438;s__	HiFi
goat-flye.metabat2.402.contigs	d__Bacteria;p__Bacillota_A;c__Clostridia;o__Peptostreptococcales;f__Anaerovoracaceae;g__RUG11894;s__RUG11894 sp017412505	HiFi
goat-flye.metabat2.409.contigs	d__Bacteria;p__Bacillota_A;c__Clostridia;o__Oscillospirales;f__Butyricicoccaceae;g__UBA4644;s__UBA4644 sp017455565	HiFi
goat-flye.metabat2.414.contigs	d__Bacteria;p__Bacteroidota;c__Bacteroidia;o__Bacteroidales;f__Bacteroidaceae;g__UBA4372;s__	HiFi
goat-flye.metabat2.415.contigs	d__Bacteria;p__Eremiobacterota;c__CADAWZ01;o__CADAWZ01;f__CADAWZ01;g__CADAWZ01;s__	HiFi
goat-flye.metabat2.418.contigs	d__Bacteria;p__Bacteroidota;c__Bacteroidia;o__Bacteroidales;f__WCHB1-69;g__RUG11690;s__RUG11690 sp902771655	HiFi
goat-flye.metabat2.419.contigs	d__Bacteria;p__Synergistota;c__Synergistia;o__Synergistales;f__Aminobacteriaceae;g__JAFUXM01;s__JAFUXM01 sp017449135	HiFi
goat-flye.metabat2.425.contigs	d__Bacteria;p__Bacillota_A;c__Clostridia;o__UBA1212;f__UBA1255;g__UBA1255;s__	HiFi
goat-flye.metabat2.437.contigs	d__Bacteria;p__Verrucomicrobiota;c__Verrucomicrobiae;o__Pedosphaerales;f__UBA1412;g__UBA1412;s__UBA1412 sp002308515	HiFi
goat-flye.metabat2.447.contigs	d__Bacteria;p__Bacillota_A;c__Clostridia;o__Oscillospirales;f__Oscillospiraceae;g__RGIG3566;s__RGIG3566 sp017445385	HiFi
goat-flye.metabat2.451.contigs	d__Bacteria;p__Bacillota_B;c__Dehalobacteriia;o__UBA4068;f__UBA4068;g__;s__	HiFi
goat-flye.metabat2.454.contigs	d__Bacteria;p__Bacillota_A;c__Clostridia;o__Oscillospirales;f__RGIG8002;g__RGIG8002;s__RGIG8002 sp017438525	HiFi
goat-flye.metabat2.459.contigs	d__Bacteria;p__Bacteroidota;c__Bacteroidia;o__Bacteroidales;f__WCHB1-69;g__F23-D06;s__F23-D06 sp017540505	HiFi
goat-flye.metabat2.461.contigs	d__Bacteria;p__Bacteroidota;c__Bacteroidia;o__Bacteroidales;f__Paludibacteraceae;g__RF16;s__RF16 sp900321775	HiFi
goat-flye.metabat2.464.contigs	d__Bacteria;p__Bacillota_A;c__Clostridia;o__Lachnospirales;f__Lachnospiraceae;g__NK4A144;s__NK4A144 sp017417105	HiFi
goat-flye.metabat2.482.contigs	d__Bacteria;p__Bacteroidota;c__Bacteroidia;o__Bacteroidales;f__Bacteroidaceae;g__UBA4372;s__UBA4372 sp017445925	HiFi
goat-flye.metabat2.491.contigs	d__Bacteria;p__Bacteroidota;c__Bacteroidia;o__Bacteroidales;f__Paludibacteraceae;g__RF16;s__	HiFi
goat-flye.metabat2.493.contigs	d__Bacteria;p__Bacillota_A;c__Clostridia;o__Christensenellales;f__UBA1242;g__Onthoplasma;s__	HiFi
goat-flye.metabat2.499.contigs	d__Bacteria;p__Bacillota_A;c__Clostridia;o__Oscillospirales;f__Acutalibacteraceae;g__UBA1227;s__UBA1227 sp017451425	HiFi
goat-flye.metabat2.506.contigs	d__Bacteria;p__Bacteroidota;c__Bacteroidia;o__Bacteroidales;f__Bacteroidaceae;g__UBA4372;s__UBA4372 sp017447625	HiFi
goat-flye.metabat2.511.contigs	d__Bacteria;p__Bacteroidota;c__Bacteroidia;o__Bacteroidales;f__Bacteroidaceae;g__Prevotella;s__Prevotella sp017449025	HiFi
goat-flye.metabat2.512.contigs	d__Bacteria;p__Bacillota;c__Bacilli;o__RFN20;f__CAG-826;g__UBA2450;s__UBA2450 sp017447165	HiFi
goat-flye.metabat2.521.contigs	d__Bacteria;p__Bacteroidota;c__Bacteroidia;o__Bacteroidales;f__Bacteroidaceae;g__UBA4372;s__	HiFi
goat-flye.metabat2.526.contigs	d__Bacteria;p__Bacteroidota;c__Bacteroidia;o__Bacteroidales;f__Paludibacteraceae;g__RF16;s__RF16 sp017394705	HiFi
goat-flye.metabat2.532.contigs	d__Bacteria;p__Synergistota;c__Synergistia;o__Synergistales;f__Aminobacteriaceae;g__JAFUXM01;s__JAFUXM01 sp017446055	HiFi
goat-hifi.concoct.006.contigs	d__Bacteria;p__Bacteroidota;c__Bacteroidia;o__Bacteroidales;f__Paludibacteraceae;g__RF16;s__	HiFi
goat-hifi.concoct.029_sub.contigs	d__Bacteria;p__Bacillota_A;c__Clostridia;o__Oscillospirales;f__Oscillospiraceae;g__Faecousia;s__Faecousia sp017405865	HiFi
goat-hifi.concoct.039_sub.contigs	d__Bacteria;p__Bacillota_A;c__Clostridia;o__Oscillospirales;f__QAMX01;g__RUG11797;s__RUG11797 sp017441705	HiFi
goat-hifi.concoct.114.contigs	d__Bacteria;p__Spirochaetota;c__Spirochaetia;o__Treponematales;f__Treponemataceae;g__Treponema_D;s__Treponema_D sp017449285	HiFi
goat-hifi.concoct.145.contigs	d__Bacteria;p__Bacillota_A;c__Clostridia;o__Oscillospirales;f__Acutalibacteraceae;g__UBA737;s__	HiFi
goat-hifi.concoct.168_sub.contigs	d__Bacteria;p__Bacillota_A;c__Clostridia;o__Christensenellales;f__CAG-1252;g__RUG14300;s__RUG14300 sp017394805	HiFi
goat-hifi.maxbin.003.contigs	d__Bacteria;p__Bacteroidota;c__Bacteroidia;o__Bacteroidales;f__Paludibacteraceae;g__RF16;s__RF16 sp017447875	HiFi
goat-hifi.maxbin.005.contigs	d__Bacteria;p__Bacillota_A;c__Clostridia;o__Christensenellales;f__CAG-138;g__RUG472;s__RUG472 sp902802575	HiFi
goat-hifi.maxbin.006_sub.contigs	d__Bacteria;p__Bacillota_A;c__Clostridia;o__Oscillospirales;f__Oscillospiraceae;g__Limivicinus;s__	HiFi
goat-hifi.maxbin.007.contigs	d__Bacteria;p__Bacteroidota;c__Bacteroidia;o__Bacteroidales;f__WCHB1-69;g__F23-D06;s__F23-D06 sp002392325	HiFi
goat-hifi.maxbin.011.contigs	d__Bacteria;p__Bacteroidota;c__Bacteroidia;o__Bacteroidales;f__Paludibacteraceae;g__RF16;s__RF16 sp902774185	HiFi
goat-hifi.maxbin.013.contigs	d__Bacteria;p__Bacillota_A;c__Clostridia;o__Christensenellales;f__CAG-74;g__RUG563;s__	HiFi
goat-hifi.maxbin.015.contigs	d__Bacteria;p__Bacteroidota;c__Bacteroidia;o__Bacteroidales;f__F082;g__Limimorpha;s__Limimorpha sp002310075	HiFi
goat-hifi.maxbin.016.contigs	d__Bacteria;p__Bacteroidota;c__Bacteroidia;o__Bacteroidales;f__F082;g__Limimorpha;s__Limimorpha sp017649945	HiFi
goat-hifi.maxbin.018.contigs	d__Bacteria;p__Planctomycetota;c__Planctomycetia;o__Pirellulales;f__Thermoguttaceae;g__RUG11551;s__RUG11551 sp017447745	HiFi
goat-hifi.maxbin.019.contigs	d__Bacteria;p__Bacillota_A;c__Clostridia;o__Oscillospirales;f__Oscillospiraceae;g__Limivicinus;s__	HiFi
goat-hifi.maxbin.020.contigs	d__Bacteria;p__Bacillota_A;c__Clostridia;o__Oscillospirales;f__Oscillospiraceae;g__Vescimonas;s__Vescimonas sp017412585	HiFi
goat-hifi.maxbin.023.contigs	d__Bacteria;p__Bacillota;c__Bacilli;o__RFN20;f__CAG-826;g__UBA3207;s__UBA3207 sp017447725	HiFi
goat-hifi.maxbin.024.contigs	d__Bacteria;p__Verrucomicrobiota;c__Kiritimatiellia;o__RFP12;f__UBA1067;g__UBA1067;s__UBA1067 sp017447805	HiFi
goat-hifi.maxbin.025.contigs	d__Bacteria;p__Patescibacteria;c__JAEDAM01;o__Absconditabacterales;f__Absconditicoccaceae;g__HOT-345;s__	HiFi
goat-hifi.maxbin.028.contigs	d__Bacteria;p__Bacillota;c__Bacilli;o__Erysipelotrichales;f__Erysipelotrichaceae;g__UBA636;s__UBA636 sp017404785	HiFi
goat-hifi.maxbin.029.contigs	d__Bacteria;p__Bacillota;c__Bacilli;o__Mycoplasmatales;f__Mycoplasmoidaceae;g__RUG11194;s__RUG11194 sp017445805	HiFi
goat-hifi.maxbin.031.contigs	d__Bacteria;p__Bacteroidota;c__Bacteroidia;o__Bacteroidales;f__UBA932;g__Cryptobacteroides;s__Cryptobacteroides sp017447815	HiFi
goat-hifi.maxbin.033.contigs	d__Bacteria;p__Bacteroidota;c__Bacteroidia;o__Bacteroidales;f__UBA932;g__RUG11257;s__RUG11257 sp017446775	HiFi
goat-hifi.maxbin.035.contigs	d__Bacteria;p__Bacillota_A;c__Clostridia;o__TANB77;f__CAG-508;g__CAG-269;s__CAG-269 sp017404025	HiFi
goat-hifi.maxbin.036.contigs	d__Bacteria;p__Bacillota;c__Bacilli;o__Mycoplasmatales;f__Mycoplasmoidaceae;g__RUG11194;s__RUG11194 sp017448105	HiFi
goat-hifi.maxbin.039.contigs	d__Bacteria;p__Bacillota_A;c__Clostridia;o__Oscillospirales;f__Ruminococcaceae;g__RGIG1955;s__RGIG1955 sp017414435	HiFi
goat-hifi.maxbin.040_sub.contigs	d__Bacteria;p__Bacillota_A;c__Clostridia;o__Oscillospirales;f__Oscillospiraceae;g__Limivicinus;s__Limivicinus sp017447645	HiFi
goat-hifi.maxbin.042.contigs	d__Bacteria;p__Bacteroidota;c__Bacteroidia;o__Bacteroidales;f__WCHB1-69;g__RUG11690;s__RUG11690 sp902771655	HiFi
goat-hifi.maxbin.043.contigs	d__Bacteria;p__Bacillota_A;c__Clostridia;o__Oscillospirales;f__CAG-382;g__UBA1752;s__UBA1752 sp017447445	HiFi
goat-hifi.maxbin.046.contigs	d__Bacteria;p__Planctomycetota;c__Planctomycetia;o__Pirellulales;f__Thermoguttaceae;g__RUG11551;s__RUG11551 sp017407125	HiFi
goat-hifi.maxbin.053.contigs	d__Bacteria;p__Patescibacteria;c__Saccharimonadia;o__Saccharimonadales;f__Nanosyncoccaceae;g__Nanosyncoccus;s__	HiFi
goat-hifi.maxbin.054_sub.contigs	d__Bacteria;p__Bacillota_A;c__Clostridia;o__Christensenellales;f__Borkfalkiaceae;g__UBA1259;s__	HiFi
goat-hifi.maxbin.055.contigs	d__Bacteria;p__Bacillota;c__Bacilli;o__Erysipelotrichales;f__Erysipelotrichaceae;g__UBA636;s__UBA636 sp017432005	HiFi
goat-hifi.maxbin.058.contigs	d__Bacteria;p__Bacillota;c__Bacilli;o__Erysipelotrichales;f__Erysipelotrichaceae;g__UBA636;s__UBA636 sp017454765	HiFi
goat-hifi.maxbin.060.contigs	d__Bacteria;p__Bacteroidota;c__Bacteroidia;o__Bacteroidales;f__UBA932;g__Bact-11;s__Bact-11 sp017428245	HiFi
goat-hifi.maxbin.061.contigs	d__Bacteria;p__Bacteroidota;c__Bacteroidia;o__Bacteroidales;f__UBA932;g__Bact-11;s__Bact-11 sp017430365	HiFi
goat-hifi.maxbin.062.contigs	d__Bacteria;p__Patescibacteria;c__Saccharimonadia;o__Saccharimonadales;f__Nanosyncoccaceae;g__Nanosyncoccus;s__	HiFi
goat-hifi.maxbin.065_sub.contigs	d__Bacteria;p__Bacillota_A;c__Clostridia;o__Oscillospirales;f__Oscillospiraceae;g__Faecousia;s__Faecousia sp017429325	HiFi
goat-hifi.maxbin.066.contigs	d__Bacteria;p__Pseudomonadota;c__Alphaproteobacteria;o__Rs-D84;f__Rs-D84;g__Enterousia;s__Enterousia sp017427715	HiFi
goat-hifi.maxbin.068.contigs	d__Bacteria;p__Bacillota_A;c__Clostridia;o__Oscillospirales;f__Acutalibacteraceae;g__Eubacterium_R;s__Eubacterium_R sp017450645	HiFi
goat-hifi.maxbin.069.contigs	d__Bacteria;p__Bacillota_A;c__Clostridia;o__Christensenellales;f__CAG-138;g__UBA3792;s__UBA3792 sp900318765	HiFi
goat-hifi.maxbin.070.contigs	d__Bacteria;p__Bacillota_A;c__Clostridia;o__UBA1381;f__UBA1381;g__Ornithomonoglobus;s__Ornithomonoglobus sp017404065	HiFi
goat-hifi.maxbin.071.contigs	d__Archaea;p__Methanobacteriota;c__Methanobacteria;o__Methanobacteriales;f__Methanobacteriaceae;g__Methanobrevibacter_A;s__Methanobrevibacter_A sp017427765	HiFi
goat-hifi.maxbin.075.contigs	d__Bacteria;p__Synergistota;c__Synergistia;o__Synergistales;f__Aminobacteriaceae;g__JAFUXM01;s__JAFUXM01 sp017405525	HiFi
goat-hifi.maxbin.077.contigs	d__Bacteria;p__Bacillota;c__Bacilli;o__Mycoplasmatales;f__Mycoplasmoidaceae;g__RUG11194;s__RUG11194 sp017445805	HiFi
goat-hifi.maxbin.078.contigs	d__Bacteria;p__Bacillota_A;c__Clostridia;o__Christensenellales;f__Christensenellaceae;g__QANA01;s__QANA01 sp017439085	HiFi
goat-hifi.maxbin.079.contigs	d__Bacteria;p__Desulfobacterota;c__Desulfovibrionia;o__Desulfovibrionales;f__Desulfovibrionaceae;g__Desulfovibrio;s__Desulfovibrio sp017528345	HiFi
goat-hifi.maxbin.080.contigs	d__Bacteria;p__Bacteroidota;c__Bacteroidia;o__Bacteroidales;f__UBA932;g__Cryptobacteroides;s__	HiFi
goat-hifi.maxbin.081.contigs	d__Bacteria;p__Bacteroidota;c__Bacteroidia;o__Bacteroidales;f__Muribaculaceae;g__Sodaliphilus;s__Sodaliphilus sp017443765	HiFi
goat-hifi.maxbin.083.contigs	d__Bacteria;p__Bacillota_A;c__Clostridia;o__Peptostreptococcales;f__Anaerovoracaceae;g__RUG11894;s__RUG11894 sp017412505	HiFi
goat-hifi.maxbin.086.contigs	d__Bacteria;p__Bacillota_A;c__Clostridia;o__Christensenellales;f__CAG-1252;g__RUG14300;s__RUG14300 sp017444385	HiFi
goat-hifi.maxbin.089.contigs	d__Bacteria;p__Patescibacteria;c__Saccharimonadia;o__Saccharimonadales;f__Nanosyncoccaceae;g__Nanosyncoccus;s__Nanosyncoccus sp017432425	HiFi
goat-hifi.maxbin.091.contigs	d__Bacteria;p__Patescibacteria;c__Saccharimonadia;o__Saccharimonadales;f__Nanosyncoccaceae;g__Nanosyncoccus;s__Nanosyncoccus sp017405265	HiFi
goat-hifi.maxbin.092.contigs	d__Bacteria;p__Bacillota_A;c__Clostridia;o__Oscillospirales;f__Acutalibacteraceae;g__CAG-177;s__CAG-177 sp017428525	HiFi
goat-hifi.maxbin.103.contigs	d__Bacteria;p__Pseudomonadota;c__Alphaproteobacteria;o__RUG11792;f__RUG11792;g__RUG11792;s__RUG11792 sp902772645	HiFi
goat-hifi.maxbin.105.contigs	d__Bacteria;p__Bacillota_A;c__Clostridia;o__Peptostreptococcales;f__Anaerovoracaceae;g__RUG754;s__	HiFi
goat-hifi.maxbin.124_sub.contigs	d__Bacteria;p__Patescibacteria;c__Saccharimonadia;o__Saccharimonadales;f__Nanosyncoccaceae;g__Nanosyncoccus;s__	HiFi
goat-hifi.maxbin.130.contigs	d__Bacteria;p__Pseudomonadota;c__Alphaproteobacteria;o__Rs-D84;f__Rs-D84;g__Enterousia;s__Enterousia sp017443235	HiFi
goat-hifi.maxbin.135_sub.contigs	d__Bacteria;p__Eremiobacterota;c__CADAWZ01;o__CADAWZ01;f__CADAWZ01;g__CADAWZ01;s__	HiFi
goat-hifi.maxbin.138.contigs	d__Bacteria;p__Patescibacteria;c__Saccharimonadia;o__Saccharimonadales;f__Nanosyncoccaceae;g__Nanosyncoccus;s__Nanosyncoccus sp017432365	HiFi
goat-hifi.maxbin.144.contigs	d__Bacteria;p__Bacillota_A;c__Clostridia;o__Christensenellales;f__UBA1242;g__UMGS2070;s__UMGS2070 sp017443885	HiFi
goat-hifi.maxbin.160.contigs	d__Bacteria;p__Bacillota_A;c__Clostridia;o__Christensenellales;f__CAG-1252;g__CAG-1252;s__CAG-1252 sp017455385	HiFi
goat-hifi.maxbin.162.contigs	d__Bacteria;p__Eremiobacterota;c__Xenobia;o__Xenobiales;f__Xenobiaceae;g__RGIG3641;s__RGIG3641 sp017458675	HiFi
goat-hifi.maxbin.230.contigs	d__Bacteria;p__Spirochaetota;c__Spirochaetia;o__CADAEX01;f__CADAEX01;g__CADAEX01;s__CADAEX01 sp017446885	HiFi
goat-hifi.maxbin.236.contigs	d__Bacteria;p__Bacillota_A;c__Clostridia;o__Christensenellales;f__Borkfalkiaceae;g__RGIG3732;s__RGIG3732 sp017453885	HiFi
goat-hifi.maxbin.266.contigs	d__Bacteria;p__Pseudomonadota;c__Gammaproteobacteria;o__UBA9339;f__UBA9339;g__;s__	HiFi
goat-hifi.maxbin.289.contigs	d__Bacteria;p__Planctomycetota;c__Planctomycetia;o__Pirellulales;f__Thermoguttaceae;g__RUG695;s__RUG695 sp017434455	HiFi
goat-hifi.metabat2.001.contigs	d__Bacteria;p__Pseudomonadota;c__Alphaproteobacteria;o__Rs-D84;f__Rs-D84;g__Enterousia;s__Enterousia sp902802115	HiFi
goat-hifi.metabat2.006.contigs	d__Bacteria;p__Bacillota_A;c__Clostridia;o__Oscillospirales;f__Acutalibacteraceae;g__;s__	HiFi
goat-hifi.metabat2.035.contigs	d__Bacteria;p__Patescibacteria;c__Saccharimonadia;o__Saccharimonadales;f__Nanosyncoccaceae;g__Nanosyncoccus;s__Nanosyncoccus sp017432225	HiFi
goat-hifi.metabat2.047.contigs	d__Bacteria;p__Bacillota_A;c__Clostridia;o__Christensenellales;f__CAG-138;g__UBA3792;s__UBA3792 sp017428025	HiFi
goat-hifi.metabat2.058.contigs	d__Bacteria;p__Bacillota_A;c__Clostridia;o__Lachnospirales;f__Lachnospiraceae;g__UBA2868;s__UBA2868 sp002350465	HiFi
goat-hifi.metabat2.059.contigs	d__Bacteria;p__Bacteroidota;c__Bacteroidia;o__Bacteroidales;f__Paludibacteraceae;g__RF16;s__RF16 sp017964045	HiFi
goat-hifi.metabat2.061.contigs	d__Bacteria;p__Synergistota;c__Synergistia;o__Synergistales;f__Aminobacteriaceae;g__JAFUXM01;s__	HiFi
goat-hifi.metabat2.095.contigs	d__Bacteria;p__Bacteroidota;c__Bacteroidia;o__Bacteroidales;f__UBA932;g__Cryptobacteroides;s__Cryptobacteroides sp017443025	HiFi
goat-hifi.metabat2.096.contigs	d__Bacteria;p__Bacillota_A;c__Clostridia;o__Lachnospirales;f__Lachnospiraceae;g__Eubacterium_G;s__	HiFi
goat-hifi.metabat2.112.contigs	d__Bacteria;p__Bacillota_A;c__Clostridia;o__Peptostreptococcales;f__Anaerovoracaceae;g__RUG099;s__	HiFi
goat-hifi.metabat2.117.contigs	d__Bacteria;p__Bacillota_C;c__Negativicutes;o__Selenomonadales;f__Selenomonadaceae;g__Quinella;s__Quinella sp017453765	HiFi
goat-hifi.metabat2.125_sub.contigs	d__Bacteria;p__Bacillota_A;c__Clostridia;o__Oscillospirales;f__Oscillospiraceae;g__RGIG3566;s__RGIG3566 sp017445385	HiFi
goat-hifi.metabat2.126.contigs	d__Bacteria;p__Bacteroidota;c__Bacteroidia;o__Bacteroidales;f__P3;g__UBA1711;s__UBA1711 sp002372855	HiFi
goat-hifi.metabat2.133.contigs	d__Bacteria;p__Bacteroidota;c__Bacteroidia;o__Bacteroidales;f__Bacteroidaceae;g__UBA4372;s__UBA4372 sp017455585	HiFi
goat-hifi.metabat2.136.contigs	d__Bacteria;p__Bacteroidota;c__Bacteroidia;o__Bacteroidales;f__Bacteroidaceae;g__Prevotella;s__	HiFi
goat-hifi.metabat2.152.contigs	d__Bacteria;p__Patescibacteria;c__Saccharimonadia;o__Saccharimonadales;f__Nanosyncoccaceae;g__Nanosyncoccus;s__	HiFi
goat-hifi.metabat2.173.contigs	d__Bacteria;p__Bacillota_A;c__Clostridia;o__Oscillospirales;f__Acutalibacteraceae;g__Ruminococcus_E;s__Ruminococcus_E sp017403985	HiFi
goat-hifi.metabat2.179.contigs	d__Bacteria;p__Bacillota_A;c__Clostridia;o__Oscillospirales;f__Acutalibacteraceae;g__UBA1227;s__UBA1227 sp017451425	HiFi
goat-hifi.metabat2.190.contigs	d__Bacteria;p__Bacillota_A;c__Clostridia;o__Christensenellales;f__CAG-74;g__Ventricola;s__Ventricola sp017458865	HiFi
goat-hifi.metabat2.192.contigs	d__Bacteria;p__Patescibacteria;c__Microgenomatia;o__UBA1400;f__PJMF01;g__RGIG2560;s__RGIG2560 sp017431625	HiFi
goat-hifi.metabat2.195.contigs	d__Bacteria;p__Bacillota_A;c__Clostridia;o__Oscillospirales;f__CAG-272;g__UBA11512;s__UBA11512 sp017454525	HiFi
goat-hifi.metabat2.199.contigs	d__Bacteria;p__Bacillota_A;c__Clostridia;o__Oscillospirales;f__CAG-272;g__RGIG3438;s__	HiFi
goat-hifi.metabat2.209.contigs	d__Bacteria;p__Bacteroidota;c__Bacteroidia;o__Bacteroidales;f__Bacteroidaceae;g__UBA4372;s__	HiFi
goat-hifi.metabat2.215.contigs	d__Bacteria;p__Bacteroidota;c__Bacteroidia;o__Bacteroidales;f__WCHB1-69;g__F23-D06;s__F23-D06 sp905235135	HiFi
goat-hifi.metabat2.235.contigs	d__Bacteria;p__Bacillota_A;c__Clostridia;o__Lachnospirales;f__Lachnospiraceae;g__UBA2868;s__UBA2868 sp017458765	HiFi
goat-hifi.metabat2.246.contigs	d__Bacteria;p__Pseudomonadota;c__Alphaproteobacteria;o__UBA3830;f__UBA3830;g__;s__	HiFi
goat-hifi.metabat2.251.contigs	d__Bacteria;p__Bacteroidota;c__Bacteroidia;o__Bacteroidales;f__Bacteroidaceae;g__Prevotella;s__Prevotella sp017455495	HiFi
goat-hifi.metabat2.260.contigs	d__Bacteria;p__Patescibacteria;c__Saccharimonadia;o__Saccharimonadales;f__Nanosyncoccaceae;g__Nanosyncoccus;s__Nanosyncoccus sp017447485	HiFi
goat-hifi.metabat2.264.contigs	d__Bacteria;p__Bacteroidota;c__Bacteroidia;o__Bacteroidales;f__P3;g__UBA1711;s__UBA1711 sp900316235	HiFi
goat-hifi.metabat2.267.contigs	d__Bacteria;p__Bacillota_A;c__Clostridia;o__Peptostreptococcales;f__Anaerovoracaceae;g__RUG754;s__RUG754 sp017394515	HiFi
goat-hifi.metabat2.271.contigs	d__Bacteria;p__Bacteroidota;c__Kapabacteria;o__Kapabacteriales;f__UBA2268;g__JAAYTD01;s__JAAYTD01 sp017428585	HiFi
goat-hifi.metabat2.272.contigs	d__Bacteria;p__Bacteroidota;c__Bacteroidia;o__Bacteroidales;f__Paludibacteraceae;g__RF16;s__RF16 sp017443145	HiFi
goat-hifi.metabat2.274.contigs	d__Bacteria;p__Bacillota_A;c__Clostridia;o__Lachnospirales;f__Lachnospiraceae;g__NK4A144;s__NK4A144 sp017448845	HiFi
goat-hifi.metabat2.275.contigs	d__Bacteria;p__Bacillota_A;c__Clostridia;o__Lachnospirales;f__Lachnospiraceae;g__UBA3633;s__	HiFi
goat-hifi.metabat2.276.contigs	d__Bacteria;p__Bacteroidota;c__Bacteroidia;o__Bacteroidales;f__UBA932;g__Cryptobacteroides;s__Cryptobacteroides sp017438975	HiFi
goat-hifi.metabat2.277_sub.contigs	d__Bacteria;p__Bacteroidota;c__Bacteroidia;o__Bacteroidales;f__Paludibacteraceae;g__Enterocola;s__Enterocola sp900316995	HiFi
goat-hifi.metabat2.287.contigs	d__Bacteria;p__Bacillota_A;c__Clostridia;o__Christensenellales;f__CAG-74;g__RUG740;s__RUG740 sp017404985	HiFi
goat-hifi.metabat2.288.contigs	d__Bacteria;p__Bacillota_A;c__Clostridia;o__UBA1212;f__UBA1255;g__UBA1255;s__	HiFi
goat-hifi.metabat2.330.contigs	d__Bacteria;p__Bacteroidota;c__Bacteroidia;o__Bacteroidales;f__Paludibacteraceae;g__RF16;s__RF16 sp900316005	HiFi
goat-hifi.metabat2.332.contigs	d__Bacteria;p__Chloroflexota;c__Anaerolineae;o__Anaerolineales;f__Anaerolineaceae;g__Flexilinea;s__Flexilinea sp017432685	HiFi
goat-hifi.metabat2.334.contigs	d__Bacteria;p__Bacillota_A;c__Clostridia;o__Christensenellales;f__CAG-74;g__RUG740;s__RUG740 sp017431005	HiFi
goat-hifi.metabat2.341.contigs	d__Bacteria;p__Bacteroidota;c__Bacteroidia;o__Bacteroidales;f__UBA932;g__RUG11257;s__RUG11257 sp017429475	HiFi
goat-hifi.metabat2.350.contigs	d__Bacteria;p__Planctomycetota;c__Planctomycetia;o__Pirellulales;f__Thermoguttaceae;g__RGIG3701;s__RGIG3701 sp017447865	HiFi
goat-hifi.metabat2.356.contigs	d__Bacteria;p__Bacillota;c__Bacilli;o__RF39;f__UBA660;g__RUG705;s__	HiFi
goat-hifi.metabat2.359.contigs	d__Bacteria;p__Bacillota;c__Bacilli;o__Erysipelotrichales;f__Erysipelotrichaceae;g__UBA636;s__UBA636 sp017441765	HiFi
goat-hifi.metabat2.390.contigs	d__Bacteria;p__Elusimicrobiota;c__Endomicrobia;o__Endomicrobiales;f__Endomicrobiaceae;g__RUG658;s__	HiFi
goat-hifi.metabat2.395.contigs	d__Bacteria;p__Bacteroidota;c__Bacteroidia;o__Bacteroidales;f__Paludibacteraceae;g__RF16;s__RF16 sp902799875	HiFi
goat-hifi.metabat2.397.contigs	d__Bacteria;p__Armatimonadota;c__UBA5829;o__UBA5829;f__UBA5829;g__RGIG7931;s__RGIG7931 sp017445025	HiFi
goat-hifi.metabat2.399.contigs	d__Bacteria;p__Bacteroidota;c__Bacteroidia;o__Bacteroidales;f__Bacteroidaceae;g__UBA4372;s__UBA4372 sp900318115	HiFi
goat-hifi.metabat2.403.contigs	d__Bacteria;p__Bacillota_A;c__Clostridia;o__Oscillospirales;f__Oscillospiraceae;g__Limivicinus;s__Limivicinus sp017428565	HiFi
goat-hifi.metabat2.410.contigs	d__Bacteria;p__Bacillota;c__Bacilli;o__RFN20;f__CAG-826;g__RUG13091;s__	HiFi
goat-hifi.metabat2.413.contigs	d__Bacteria;p__Bacteroidota;c__Bacteroidia;o__Bacteroidales;f__Bacteroidaceae;g__UBA2918;s__UBA2918 sp017442855	HiFi
goat-hifi.metabat2.416.contigs	d__Bacteria;p__Bacillota_A;c__Clostridia;o__Lachnospirales;f__Bianqueaceae;g__RUG12817;s__RUG12817 sp017441925	HiFi
goat-hifi.metabat2.420.contigs	d__Bacteria;p__Bacillota_A;c__Clostridia;o__Oscillospirales;f__Ruminococcaceae;g__RUG11783;s__RUG11783 sp017432285	HiFi
goat-hifi.metabat2.427.contigs	d__Bacteria;p__Bacteroidota;c__Bacteroidia;o__Bacteroidales;f__Bacteroidaceae;g__UBA4372;s__UBA4372 sp017427185	HiFi
goat-hifi.metabat2.432.contigs	d__Bacteria;p__Bacteroidota;c__Bacteroidia;o__Bacteroidales;f__Bacteroidaceae;g__UBA4372;s__UBA4372 sp017445925	HiFi
goat-hifi.metabat2.435.contigs	d__Bacteria;p__Bacillota_A;c__Clostridia;o__Saccharofermentanales;f__Saccharofermentanaceae;g__Saccharofermentans;s__Saccharofermentans sp017451265	HiFi
goat-hifi.metabat2.436.contigs	d__Bacteria;p__Bacteroidota;c__Bacteroidia;o__Bacteroidales;f__UBA932;g__RUG11257;s__RUG11257 sp017428035	HiFi
goat-hifi.metabat2.437.contigs	d__Bacteria;p__Patescibacteria;c__Saccharimonadia;o__Saccharimonadales;f__Nanosyncoccaceae;g__Nanosyncoccus;s__Nanosyncoccus sp017432305	HiFi
goat-hifi.metabat2.449.contigs	d__Bacteria;p__Bacillota_A;c__Clostridia;o__Oscillospirales;f__Oscillospiraceae;g__Dysosmobacter;s__Dysosmobacter sp017446225	HiFi
goat-hifi.metabat2.452.contigs	d__Bacteria;p__Armatimonadota;c__UBA5829;o__UBA5829;f__UBA5829;g__RGIG7931;s__	HiFi
goat-hifi.metabat2.453.contigs	d__Bacteria;p__Bacillota_A;c__Clostridia;o__Lachnospirales;f__Lachnospiraceae;g__UBA2868;s__UBA2868 sp017450065	HiFi
goat-hifi.metabat2.459.contigs	d__Bacteria;p__Bacillota_A;c__Clostridia;o__Peptostreptococcales;f__Anaerovoracaceae;g__Eubacterium_B;s__Eubacterium_B sp017445315	HiFi
goat-hifi.metabat2.461.contigs	d__Bacteria;p__Synergistota;c__Synergistia;o__Synergistales;f__Aminobacteriaceae;g__JAFUXM01;s__JAFUXM01 sp017446055	HiFi
goat-hifi.metabat2.463.contigs	d__Bacteria;p__Bacteroidota;c__Bacteroidia;o__Bacteroidales;f__Paludibacteraceae;g__RF16;s__RF16 sp017450435	HiFi
goat-hifi.metabat2.469.contigs	d__Bacteria;p__Bacillota_A;c__Clostridia;o__Lachnospirales;f__Lachnospiraceae;g__RUG306;s__RUG306 sp902772635	HiFi
goat-hifi.metabat2.472.contigs	d__Bacteria;p__Bacteroidota;c__Bacteroidia;o__Bacteroidales;f__UBA932;g__Egerieousia;s__Egerieousia sp017428325	HiFi
goat-hifi.metabat2.474.contigs	d__Bacteria;p__Bacillota_A;c__Clostridia;o__Oscillospirales;f__CAG-272;g__RUG11130;s__RUG11130 sp017428635	HiFi
goat-hifi.metabat2.477.contigs	d__Bacteria;p__Bacillota_A;c__Clostridia;o__Saccharofermentanales;f__Saccharofermentanaceae;g__Firm-16;s__Firm-16 sp017428545	HiFi
goat-hifi.metabat2.492.contigs	d__Bacteria;p__Bacteroidota;c__Bacteroidia;o__Bacteroidales;f__P3;g__Phil12;s__Phil12 sp900314725	HiFi
goat-hifi.metabat2.493.contigs	d__Bacteria;p__Synergistota;c__Synergistia;o__Synergistales;f__Aminobacteriaceae;g__JAFUXM01;s__JAFUXM01 sp017444345	HiFi
goat-hifi.metabat2.494.contigs	d__Bacteria;p__Bacteroidota;c__Bacteroidia;o__Bacteroidales;f__F082;g__Limimorpha;s__	HiFi
goat-hifi.metabat2.501.contigs	d__Bacteria;p__Bacillota;c__Bacilli;o__RFN20;f__CAG-826;g__SIG220;s__	HiFi
goat-hifi.metabat2.509.contigs	d__Bacteria;p__Bacillota_A;c__Clostridia;o__Oscillospirales;f__Acutalibacteraceae;g__UBA6857;s__	HiFi
goat-hifi.metabat2.510.contigs	d__Bacteria;p__Bacillota_A;c__Clostridia;o__Christensenellales;f__CAG-74;g__UBA2862;s__UBA2862 sp017432405	HiFi
goat-hifi.metabat2.515_sub.contigs	d__Bacteria;p__Bacteroidota;c__Bacteroidia;o__Bacteroidales;f__Bacteroidaceae;g__UBA4334;s__UBA4334 sp902800305	HiFi
goat-hifi.metabat2.525.contigs	d__Bacteria;p__Bacillota_A;c__Clostridia;o__Oscillospirales;f__CAG-272;g__UMGS1865;s__UMGS1865 sp017450945	HiFi
goat-hifi.metabat2.530.contigs	d__Bacteria;p__Bacteroidota;c__Bacteroidia;o__Bacteroidales;f__WCHB1-69;g__F23-D06;s__F23-D06 sp017540505	HiFi
goat-hifi.metabat2.531.contigs	d__Bacteria;p__Bacteroidota;c__Bacteroidia;o__Bacteroidales;f__Bacteroidaceae;g__UBA4372;s__UBA4372 sp902779165	HiFi
goat-hifi.metabat2.538.contigs	d__Bacteria;p__Planctomycetota;c__Planctomycetia;o__Pirellulales;f__Thermoguttaceae;g__RGIG3701;s__	HiFi
goat-hifi.metabat2.543.contigs	d__Bacteria;p__Bacteroidota;c__Bacteroidia;o__Bacteroidales;f__F082;g__Limimorpha;s__Limimorpha sp017439405	HiFi
goat-hifi.metabat2.544_sub.contigs	d__Bacteria;p__Bacteroidota;c__Bacteroidia;o__Bacteroidales;f__Bacteroidaceae;g__Prevotella;s__Prevotella sp017443345	HiFi
goat-hifi.metabat2.545.contigs	d__Bacteria;p__Bacillota;c__Bacilli;o__Erysipelotrichales;f__Erysipelotrichaceae;g__RUG521;s__RUG521 sp017405785	HiFi
goat-hifi.metabat2.547.contigs	d__Bacteria;p__Bacteroidota;c__Bacteroidia;o__Bacteroidales;f__F082;g__Limimorpha;s__Limimorpha sp017428285	HiFi
goat-hifi.metabat2.550.contigs	d__Bacteria;p__Bacillota_A;c__Clostridia;o__Lachnospirales;f__Lachnospiraceae;g__UBA6987;s__UBA6987 sp017428105	HiFi
goat-hifi.metabat2.553.contigs	d__Bacteria;p__Bacillota;c__Bacilli;o__Erysipelotrichales;f__Erysipelotrichaceae;g__UBA636;s__UBA636 sp017432545	HiFi
goat-hifi.metabat2.554.contigs	d__Bacteria;p__Bacillota_A;c__Clostridia;o__Christensenellales;f__UBA1242;g__Onthoplasma;s__	HiFi
goat-hifi.metabat2.557.contigs	d__Bacteria;p__Bacillota;c__Bacilli;o__Erysipelotrichales;f__Erysipelotrichaceae;g__Bulleidia;s__Bulleidia sp017432325	HiFi
goat-hifi.metabat2.563.contigs	d__Bacteria;p__Patescibacteria;c__Saccharimonadia;o__Saccharimonadales;f__Nanosyncoccaceae;g__Nanosyncoccus;s__Nanosyncoccus sp017406565	HiFi
goat-hifi.metabat2.566.contigs	d__Bacteria;p__Verrucomicrobiota;c__Kiritimatiellia;o__LD1-PB3_B;f__Lenti-01;g__RGIG3636;s__RGIG3636 sp017458625	HiFi
goat-hifi.metabat2.568.contigs	d__Bacteria;p__Bacteroidota;c__Bacteroidia;o__Bacteroidales;f__WCHB1-69;g__RUG11942;s__RUG11942 sp017964755	HiFi
goat-hifi.metabat2.570.contigs	d__Bacteria;p__Bacillota_A;c__Clostridia;o__Christensenellales;f__CAG-74;g__UBA4246;s__UBA4246 sp017430225	HiFi
goat-hifi.metabat2.575.contigs	d__Bacteria;p__Bacteroidota;c__Bacteroidia;o__Bacteroidales;f__UBA932;g__Cryptobacteroides;s__Cryptobacteroides sp900319685	HiFi
goat-hifi.metabat2.583.contigs	d__Bacteria;p__Bacteroidota;c__Bacteroidia;o__Bacteroidales;f__UBA932;g__Cryptobacteroides;s__Cryptobacteroides sp017428945	HiFi
goat-hifi.metabat2.586.contigs	d__Bacteria;p__Bacillota_A;c__Clostridia;o__Oscillospirales;f__Acutalibacteraceae;g__UBA1425;s__UBA1425 sp017449935	HiFi
goat-hifi.metabat2.600.contigs	d__Bacteria;p__Bacillota_A;c__Clostridia;o__Oscillospirales;f__CAG-272;g__RGIG6816;s__RGIG6816 sp017447775	HiFi
goat-hifi.metabat2.609.contigs	d__Bacteria;p__Desulfobacterota;c__Desulfovibrionia;o__Desulfovibrionales;f__Desulfovibrionaceae;g__Desulfovibrio;s__	HiFi
goat-hifi.metabat2.620.contigs	d__Bacteria;p__Bacillota_A;c__Clostridia;o__Saccharofermentanales;f__Saccharofermentanaceae;g__Saccharofermentans;s__Saccharofermentans sp017428155	HiFi
goat-hifi.metabat2.624.contigs	d__Bacteria;p__Bacillota_A;c__Clostridia;o__Oscillospirales;f__CAG-272;g__RUG14199;s__RUG14199 sp017445115	HiFi
goat-hifi.metabat2.640.contigs	d__Bacteria;p__Synergistota;c__Synergistia;o__Synergistales;f__Aminobacteriaceae;g__JAFUXM01;s__JAFUXM01 sp017439345	HiFi
goat-hifi.metabat2.645.contigs	d__Bacteria;p__Bacteroidota;c__Bacteroidia;o__Bacteroidales;f__P3;g__UBA1711;s__UBA1711 sp900318665	HiFi
goat-hifi.metabat2.654_sub.contigs	d__Bacteria;p__Bacillota_A;c__Clostridia;o__Oscillospirales;f__UBA644;g__HGM12619;s__HGM12619 sp017427285	HiFi
goat-hifi.metabat2.666.contigs	d__Bacteria;p__Bacillota_A;c__Clostridia;o__Lachnospirales;f__Lachnospiraceae;g__RGIG5612;s__RGIG5612 sp017431485	HiFi
goat-hifi.metabat2.670.contigs	d__Bacteria;p__Bacillota_A;c__Clostridia;o__Peptostreptococcales;f__Anaerovoracaceae;g__RUG13409;s__RUG13409 sp017437745	HiFi
goat-hifi.metabat2.672.contigs	d__Bacteria;p__Bacteroidota;c__Bacteroidia;o__Bacteroidales;f__Bacteroidaceae;g__Prevotella;s__Prevotella sp017430675	HiFi
goat-hifi.metabat2.676.contigs	d__Bacteria;p__Bacillota_A;c__Clostridia;o__Christensenellales;f__CAG-138;g__CAG-1024;s__CAG-1024 sp017429985	HiFi
goat-hifi.metabat2.685.contigs	d__Bacteria;p__Bacteroidota;c__Bacteroidia;o__Bacteroidales;f__Paludibacteraceae;g__RF16;s__	HiFi
goat-hifi.metabat2.693.contigs	d__Bacteria;p__Bacteroidota;c__Bacteroidia;o__Bacteroidales;f__UBA932;g__Cryptobacteroides;s__Cryptobacteroides sp017445755	HiFi
goat-hifi.metabat2.701.contigs	d__Bacteria;p__Bacillota;c__Bacilli;o__RFN20;f__CAG-826;g__UBA2450;s__UBA2450 sp017447165	HiFi
goat-hifi.metabat2.720.contigs	d__Bacteria;p__Bacteroidota;c__Bacteroidia;o__Bacteroidales;f__UBA932;g__RUG11257;s__RUG11257 sp017450655	HiFi
goat-hifi.metabat2.724.contigs	d__Bacteria;p__Synergistota;c__Synergistia;o__Synergistales;f__Aminobacteriaceae;g__JAFUXM01;s__JAFUXM01 sp017443945	HiFi
goat-hifi.metabat2.736.contigs	d__Bacteria;p__Bacteroidota;c__Bacteroidia;o__Bacteroidales;f__Bacteroidaceae;g__Prevotella;s__Prevotella sp017449025	HiFi
goat-hifi.metabat2.742.contigs	d__Bacteria;p__Bacillota_A;c__Clostridia;o__Oscillospirales;f__Acutalibacteraceae;g__Ruminococcus_E;s__Ruminococcus_E sp017446165	HiFi
goat-hifi.metabat2.753.contigs	d__Bacteria;p__Bacillota;c__Bacilli;o__RFN20;f__CAG-826;g__RUG13091;s__RUG13091 sp017429285	HiFi
goat-hifi.metabat2.755.contigs	d__Bacteria;p__Bacillota;c__Bacilli;o__ML615J-28;f__CAG-698;g__CAG-698;s__	HiFi
goat-hifi.metabat2.756.contigs	d__Bacteria;p__Bacillota_A;c__Clostridia;o__Oscillospirales;f__Oscillospiraceae;g__Limivicinus;s__Limivicinus sp900316255	HiFi
goat-hifi.metabat2.761.contigs	d__Bacteria;p__Bacteroidota;c__Bacteroidia;o__Bacteroidales;f__UBA932;g__Cryptobacteroides;s__Cryptobacteroides sp017454905	HiFi
goat-hifi.metabat2.768.contigs	d__Bacteria;p__Bacteroidota;c__Bacteroidia;o__Bacteroidales;f__Bacteroidaceae;g__Prevotella;s__Prevotella sp900316285	HiFi
goat-hifi.metabat2.770.contigs	d__Bacteria;p__Patescibacteria;c__JAEDAM01;o__Absconditabacterales;f__Absconditicoccaceae;g__HOT-345;s__HOT-345 sp017453665	HiFi
goat-hifi.metabat2.773.contigs	d__Bacteria;p__Bacteroidota;c__Bacteroidia;o__Bacteroidales;f__UBA932;g__Cryptobacteroides;s__Cryptobacteroides sp900319375	HiFi
goat-hifi.metabat2.775.contigs	d__Bacteria;p__Verrucomicrobiota;c__Verrucomicrobiae;o__Pedosphaerales;f__UBA1412;g__UBA1412;s__UBA1412 sp002308515	HiFi
goat-hifi.metabat2.778.contigs	d__Bacteria;p__Bacteroidota;c__Bacteroidia;o__Bacteroidales;f__Paludibacteraceae;g__RF16;s__RF16 sp017417025	HiFi
goat-hifi.metabat2.779.contigs	d__Bacteria;p__Bacillota_A;c__Clostridia;o__Oscillospirales;f__CAG-272;g__RUG12395;s__RUG12395 sp017450965	HiFi
goat-hifi.metabat2.794.contigs	d__Bacteria;p__Bacteroidota;c__Bacteroidia;o__Bacteroidales;f__Bacteroidaceae;g__UBA4334;s__UBA4334 sp017448965	HiFi
goat-hifi.metabat2.802.contigs	d__Bacteria;p__Bacillota_A;c__Clostridia;o__Oscillospirales;f__Oscillospiraceae;g__Dysosmobacter;s__	HiFi
goat-hifi.metabat2.809.contigs	d__Bacteria;p__Synergistota;c__Synergistia;o__Synergistales;f__Aminobacteriaceae;g__JAFUXM01;s__JAFUXM01 sp017448685	HiFi
goat-hifi.metabat2.814.contigs	d__Bacteria;p__Bacillota_A;c__Clostridia;o__Oscillospirales;f__Ruminococcaceae;g__RUG12519;s__	HiFi
goat-hifi.metabat2.826.contigs	d__Bacteria;p__Bacteroidota;c__Bacteroidia;o__Bacteroidales;f__ML635J-15;g__Bact-19;s__Bact-19 sp902762455	HiFi
goat-hifi.metabat2.828.contigs	d__Bacteria;p__Bacillota_B;c__Dehalobacteriia;o__UBA4068;f__UBA4068;g__;s__	HiFi
goat-hifi.metabat2.836.contigs	d__Bacteria;p__Bacillota;c__Bacilli;o__Izemoplasmatales;f__UBA1188;g__UBA1188;s__	HiFi
goat-hifi.metabat2.843.contigs	d__Bacteria;p__Bacteroidota;c__Bacteroidia;o__Bacteroidales;f__P3;g__UBA1711;s__UBA1711 sp017428115	HiFi
goat-hifi.metabat2.848.contigs	d__Archaea;p__Methanobacteriota;c__Methanobacteria;o__Methanobacteriales;f__Methanobacteriaceae;g__Methanobrevibacter_A;s__Methanobrevibacter_A sp017409525	HiFi
goat-hifi.metabat2.853.contigs	d__Bacteria;p__Bacteroidota;c__Bacteroidia;o__Bacteroidales;f__WCHB1-69;g__UBA1195;s__UBA1195 sp902774175	HiFi
goat-hifi.metabat2.859.contigs	d__Bacteria;p__Bacteroidota;c__Bacteroidia;o__Bacteroidales;f__P3;g__UBA1711;s__UBA1711 sp017451385	HiFi
goat-hifi.metabat2.864.contigs	d__Bacteria;p__Bacillota_A;c__Clostridia;o__Oscillospirales;f__Acutalibacteraceae;g__Ruminococcus_E;s__Ruminococcus_E sp017433905	HiFi
goat-hifi.metabat2.882.contigs	d__Bacteria;p__Desulfobacterota;c__Desulfovibrionia;o__Desulfovibrionales;f__Desulfovibrionaceae;g__Desulfovibrio;s__Desulfovibrio sp017454855	HiFi
goat-hifi.metabat2.885.contigs	d__Bacteria;p__Bacillota_A;c__Clostridia;o__Lachnospirales;f__Lachnospiraceae;g__NK4A144;s__NK4A144 sp017417105	HiFi
goat-hifi.metabat2.897.contigs	d__Bacteria;p__Bacteroidota;c__Bacteroidia;o__Bacteroidales;f__Paludibacteraceae;g__RF16;s__RF16 sp900321775	HiFi
goat-hifi.metabat2.898.contigs	d__Bacteria;p__Bacteroidota;c__Bacteroidia;o__Bacteroidales;f__P3;g__RGIG10147;s__RGIG10147 sp017454015	HiFi
goat-hifi.metabat2.900.contigs	d__Bacteria;p__Bacteroidota;c__Bacteroidia;o__Bacteroidales;f__P3;g__UBA1711;s__UBA1711 sp902774845	HiFi
