# Supplementary material for: Spatial heterogeneity of viral communities across the gastrointestinal tracts of ruminants
Source: Research Square preprint supplement (doi:10.21203/rs.3.rs-4244627/v1), 2024-04-10
Supplement: Supplementary file 13 [file b2452cef5590385f173498f3.xlsx]

## Sheet: Table S3
Table S3. Overview and origin of vOTUs
vOTU	Contigs	Length	Data-origin	Sequencing	Species	Regions
RGVC1	2022NBT-1	999413	NBT	HiFi	sheep	feces
RGVC2	2022NBT-10	992972	NBT	HiFi	sheep	feces
RGVC3	2022NBT-100485	20271	NBT	HiFi	sheep	feces
RGVC4	2022NBT-100608	20217	NBT	HiFi	sheep	feces
RGVC5	2022NBT-10062	206229	NBT	HiFi	sheep	feces
RGVC6	2022NBT-10064	206215	NBT	HiFi	sheep	feces
RGVC7	2022NBT-10065	206209	NBT	HiFi	sheep	feces
RGVC8	2022NBT-10069	206125	NBT	HiFi	sheep	feces
RGVC9	2022NBT-10081	205920	NBT	HiFi	sheep	feces
RGVC10	2022NBT-100944	20078	NBT	HiFi	sheep	feces
RGVC11	2022NBT-10096	205666	NBT	HiFi	sheep	feces
RGVC12	2022NBT-10107_1	45776	NBT	HiFi	sheep	feces
RGVC13	2022NBT-1011	699039	NBT	HiFi	sheep	feces
RGVC14	2022NBT-10122	205302	NBT	HiFi	sheep	feces
RGVC15	2022NBT-101271	19936	NBT	HiFi	sheep	feces
RGVC16	2022NBT-1013	698852	NBT	HiFi	sheep	feces
RGVC17	2022NBT-1014_1	42967	NBT	HiFi	sheep	feces
RGVC18	2022NBT-101408	19879	NBT	HiFi	sheep	feces
RGVC19	2022NBT-1015_1	80748	NBT	HiFi	sheep	feces
RGVC20	2022NBT-101566	19821	NBT	HiFi	sheep	feces
RGVC21	2022NBT-10157_1	41803	NBT	HiFi	sheep	feces
RGVC22	2022NBT-101582	19815	NBT	HiFi	sheep	feces
RGVC23	2022NBT-101640_1	18522	NBT	HiFi	sheep	feces
RGVC24	2022NBT-101643	19785	NBT	HiFi	sheep	feces
RGVC25	2022NBT-1017_1	44756	NBT	HiFi	sheep	feces
RGVC26	2022NBT-10175	204439	NBT	HiFi	sheep	feces
RGVC27	2022NBT-10182_1	37478	NBT	HiFi	sheep	feces
RGVC28	2022NBT-10182_2	32381	NBT	HiFi	sheep	feces
RGVC29	2022NBT-101864	19690	NBT	HiFi	sheep	feces
RGVC30	2022NBT-10190_1	41668	NBT	HiFi	sheep	feces
RGVC31	2022NBT-10209	203923	NBT	HiFi	sheep	feces
RGVC32	2022NBT-1021	697585	NBT	HiFi	sheep	feces
RGVC33	2022NBT-10218	203704	NBT	HiFi	sheep	feces
RGVC34	2022NBT-10219_1	44128	NBT	HiFi	sheep	feces
RGVC35	2022NBT-102322	19524	NBT	HiFi	sheep	feces
RGVC36	2022NBT-10237_1	41586	NBT	HiFi	sheep	feces
RGVC37	2022NBT-1024	697392	NBT	HiFi	sheep	feces
RGVC38	2022NBT-1025_1	34457	NBT	HiFi	sheep	feces
RGVC39	2022NBT-10253	203011	NBT	HiFi	sheep	feces
RGVC40	2022NBT-10257	202840	NBT	HiFi	sheep	feces
RGVC41	2022NBT-10258_1	52416	NBT	HiFi	sheep	feces
RGVC42	2022NBT-1026	696492	NBT	HiFi	sheep	feces
RGVC43	2022NBT-10261	202741	NBT	HiFi	sheep	feces
RGVC44	2022NBT-102619	19394	NBT	HiFi	sheep	feces
RGVC45	2022NBT-10278	202459	NBT	HiFi	sheep	feces
RGVC46	2022NBT-10281	202450	NBT	HiFi	sheep	feces
RGVC47	2022NBT-102869	19295	NBT	HiFi	sheep	feces
RGVC48	2022NBT-10288	202393	NBT	HiFi	sheep	feces
RGVC49	2022NBT-10295	202291	NBT	HiFi	sheep	feces
RGVC50	2022NBT-103107	19197	NBT	HiFi	sheep	feces
RGVC51	2022NBT-1032	694999	NBT	HiFi	sheep	feces
RGVC52	2022NBT-10321	201968	NBT	HiFi	sheep	feces
RGVC53	2022NBT-10329	201855	NBT	HiFi	sheep	feces
RGVC54	2022NBT-10336	201676	NBT	HiFi	sheep	feces
RGVC55	2022NBT-10345	201523	NBT	HiFi	sheep	feces
RGVC56	2022NBT-1035	694584	NBT	HiFi	sheep	feces
RGVC57	2022NBT-10354_1	54006	NBT	HiFi	sheep	feces
RGVC58	2022NBT-103617	18964	NBT	HiFi	sheep	feces
RGVC59	2022NBT-1037_1	38674	NBT	HiFi	sheep	feces
RGVC60	2022NBT-10374	201151	NBT	HiFi	sheep	feces
RGVC61	2022NBT-10376	201148	NBT	HiFi	sheep	feces
RGVC62	2022NBT-1039	694038	NBT	HiFi	sheep	feces
RGVC63	2022NBT-10395	200919	NBT	HiFi	sheep	feces
RGVC64	2022NBT-104	957180	NBT	HiFi	sheep	feces
RGVC65	2022NBT-1040	693814	NBT	HiFi	sheep	feces
RGVC66	2022NBT-10402	200797	NBT	HiFi	sheep	feces
RGVC67	2022NBT-104037	18796	NBT	HiFi	sheep	feces
RGVC68	2022NBT-10404_1	41866	NBT	HiFi	sheep	feces
RGVC69	2022NBT-10411	200637	NBT	HiFi	sheep	feces
RGVC70	2022NBT-10415	200628	NBT	HiFi	sheep	feces
RGVC71	2022NBT-104156	18750	NBT	HiFi	sheep	feces
RGVC72	2022NBT-104186	18738	NBT	HiFi	sheep	feces
RGVC73	2022NBT-10419_1	46462	NBT	HiFi	sheep	feces
RGVC74	2022NBT-1042	693728	NBT	HiFi	sheep	feces
RGVC75	2022NBT-10442	200147	NBT	HiFi	sheep	feces
RGVC76	2022NBT-10445	200086	NBT	HiFi	sheep	feces
RGVC77	2022NBT-10449_1	135606	NBT	HiFi	sheep	feces
RGVC78	2022NBT-10456	199828	NBT	HiFi	sheep	feces
RGVC79	2022NBT-10459	199803	NBT	HiFi	sheep	feces
RGVC80	2022NBT-104610	18567	NBT	HiFi	sheep	feces
RGVC81	2022NBT-10464	199749	NBT	HiFi	sheep	feces
RGVC82	2022NBT-1047	692560	NBT	HiFi	sheep	feces
RGVC83	2022NBT-10476	199489	NBT	HiFi	sheep	feces
RGVC84	2022NBT-1048	692530	NBT	HiFi	sheep	feces
RGVC85	2022NBT-10488	199352	NBT	HiFi	sheep	feces
RGVC86	2022NBT-104890	18459	NBT	HiFi	sheep	feces
RGVC87	2022NBT-10492	199296	NBT	HiFi	sheep	feces
RGVC88	2022NBT-104978	18426	NBT	HiFi	sheep	feces
RGVC89	2022NBT-1050	692364	NBT	HiFi	sheep	feces
RGVC90	2022NBT-10500	199061	NBT	HiFi	sheep	feces
RGVC91	2022NBT-105064	18399	NBT	HiFi	sheep	feces
RGVC92	2022NBT-1053	692061	NBT	HiFi	sheep	feces
RGVC93	2022NBT-10535	198593	NBT	HiFi	sheep	feces
RGVC94	2022NBT-10537	198586	NBT	HiFi	sheep	feces
RGVC95	2022NBT-10592_1	53076	NBT	HiFi	sheep	feces
RGVC96	2022NBT-10596	197779	NBT	HiFi	sheep	feces
RGVC97	2022NBT-106	956194	NBT	HiFi	sheep	feces
RGVC98	2022NBT-10600	197670	NBT	HiFi	sheep	feces
RGVC99	2022NBT-106159	18006	NBT	HiFi	sheep	feces
RGVC100	2022NBT-1062	690494	NBT	HiFi	sheep	feces
RGVC101	2022NBT-106276	17963	NBT	HiFi	sheep	feces
RGVC102	2022NBT-10639	197044	NBT	HiFi	sheep	feces
RGVC103	2022NBT-10641	197012	NBT	HiFi	sheep	feces
RGVC104	2022NBT-10648_1	62489	NBT	HiFi	sheep	feces
RGVC105	2022NBT-1065	689786	NBT	HiFi	sheep	feces
RGVC106	2022NBT-10655_1	34543	NBT	HiFi	sheep	feces
RGVC107	2022NBT-1066	689408	NBT	HiFi	sheep	feces
RGVC108	2022NBT-106640	17828	NBT	HiFi	sheep	feces
RGVC109	2022NBT-106648	17826	NBT	HiFi	sheep	feces
RGVC110	2022NBT-10666_1	37648	NBT	HiFi	sheep	feces
RGVC111	2022NBT-106663	17821	NBT	HiFi	sheep	feces
RGVC112	2022NBT-1067	689153	NBT	HiFi	sheep	feces
RGVC113	2022NBT-10676	196499	NBT	HiFi	sheep	feces
RGVC114	2022NBT-10680	196453	NBT	HiFi	sheep	feces
RGVC115	2022NBT-10695	196186	NBT	HiFi	sheep	feces
RGVC116	2022NBT-1070	688516	NBT	HiFi	sheep	feces
RGVC117	2022NBT-10710_1	52229	NBT	HiFi	sheep	feces
RGVC118	2022NBT-10714	195911	NBT	HiFi	sheep	feces
RGVC119	2022NBT-1072	688236	NBT	HiFi	sheep	feces
RGVC120	2022NBT-107229	17611	NBT	HiFi	sheep	feces
RGVC121	2022NBT-107253	17600	NBT	HiFi	sheep	feces
RGVC122	2022NBT-10734	195641	NBT	HiFi	sheep	feces
RGVC123	2022NBT-107346	17574	NBT	HiFi	sheep	feces
RGVC124	2022NBT-10736	195633	NBT	HiFi	sheep	feces
RGVC125	2022NBT-1074	687727	NBT	HiFi	sheep	feces
RGVC126	2022NBT-107528	17507	NBT	HiFi	sheep	feces
RGVC127	2022NBT-10759	195356	NBT	HiFi	sheep	feces
RGVC128	2022NBT-1076	687427	NBT	HiFi	sheep	feces
RGVC129	2022NBT-10764_1	68064	NBT	HiFi	sheep	feces
RGVC130	2022NBT-10779	195054	NBT	HiFi	sheep	feces
RGVC131	2022NBT-107805	17413	NBT	HiFi	sheep	feces
RGVC132	2022NBT-10783	194995	NBT	HiFi	sheep	feces
RGVC133	2022NBT-1079	686813	NBT	HiFi	sheep	feces
RGVC134	2022NBT-10790	194951	NBT	HiFi	sheep	feces
RGVC135	2022NBT-10791	194947	NBT	HiFi	sheep	feces
RGVC136	2022NBT-10793	194900	NBT	HiFi	sheep	feces
RGVC137	2022NBT-107951	17359	NBT	HiFi	sheep	feces
RGVC138	2022NBT-10799	194842	NBT	HiFi	sheep	feces
RGVC139	2022NBT-1080_1	41621	NBT	HiFi	sheep	feces
RGVC140	2022NBT-10800_1	133692	NBT	HiFi	sheep	feces
RGVC141	2022NBT-108006	17339	NBT	HiFi	sheep	feces
RGVC142	2022NBT-108135	17295	NBT	HiFi	sheep	feces
RGVC143	2022NBT-10853	194081	NBT	HiFi	sheep	feces
RGVC144	2022NBT-108591	17119	NBT	HiFi	sheep	feces
RGVC145	2022NBT-10861	193839	NBT	HiFi	sheep	feces
RGVC146	2022NBT-108708	17071	NBT	HiFi	sheep	feces
RGVC147	2022NBT-108818	17034	NBT	HiFi	sheep	feces
RGVC148	2022NBT-10885	193614	NBT	HiFi	sheep	feces
RGVC149	2022NBT-109202	16901	NBT	HiFi	sheep	feces
RGVC150	2022NBT-10921_1	51687	NBT	HiFi	sheep	feces
RGVC151	2022NBT-1093_1	122382	NBT	HiFi	sheep	feces
RGVC152	2022NBT-1094	684217	NBT	HiFi	sheep	feces
RGVC153	2022NBT-109537	16777	NBT	HiFi	sheep	feces
RGVC154	2022NBT-109576	16761	NBT	HiFi	sheep	feces
RGVC155	2022NBT-1096	683258	NBT	HiFi	sheep	feces
RGVC156	2022NBT-109608	16749	NBT	HiFi	sheep	feces
RGVC157	2022NBT-1099	682812	NBT	HiFi	sheep	feces
RGVC158	2022NBT-109932	16641	NBT	HiFi	sheep	feces
RGVC159	2022NBT-110_1	38547	NBT	HiFi	sheep	feces
RGVC160	2022NBT-11003	191643	NBT	HiFi	sheep	feces
RGVC161	2022NBT-11004_1	53747	NBT	HiFi	sheep	feces
RGVC162	2022NBT-11012	191515	NBT	HiFi	sheep	feces
RGVC163	2022NBT-110186	16551	NBT	HiFi	sheep	feces
RGVC164	2022NBT-11035	191136	NBT	HiFi	sheep	feces
RGVC165	2022NBT-1104	681581	NBT	HiFi	sheep	feces
RGVC166	2022NBT-11040	191010	NBT	HiFi	sheep	feces
RGVC167	2022NBT-110460	16440	NBT	HiFi	sheep	feces
RGVC168	2022NBT-11047_1	35464	NBT	HiFi	sheep	feces
RGVC169	2022NBT-11053	190777	NBT	HiFi	sheep	feces
RGVC170	2022NBT-110639	16372	NBT	HiFi	sheep	feces
RGVC171	2022NBT-11077	190429	NBT	HiFi	sheep	feces
RGVC172	2022NBT-110861	16292	NBT	HiFi	sheep	feces
RGVC173	2022NBT-11106_1	44616	NBT	HiFi	sheep	feces
RGVC174	2022NBT-11110	190068	NBT	HiFi	sheep	feces
RGVC175	2022NBT-11116	190003	NBT	HiFi	sheep	feces
RGVC176	2022NBT-111227	16149	NBT	HiFi	sheep	feces
RGVC177	2022NBT-11126_1	39009	NBT	HiFi	sheep	feces
RGVC178	2022NBT-11127	189880	NBT	HiFi	sheep	feces
RGVC179	2022NBT-11144	189577	NBT	HiFi	sheep	feces
RGVC180	2022NBT-11157	189413	NBT	HiFi	sheep	feces
RGVC181	2022NBT-11158_1	183093	NBT	HiFi	sheep	feces
RGVC182	2022NBT-11160	189344	NBT	HiFi	sheep	feces
RGVC183	2022NBT-11165	189299	NBT	HiFi	sheep	feces
RGVC184	2022NBT-11167	189263	NBT	HiFi	sheep	feces
RGVC185	2022NBT-11169	189253	NBT	HiFi	sheep	feces
RGVC186	2022NBT-1117	679367	NBT	HiFi	sheep	feces
RGVC187	2022NBT-111741	15971	NBT	HiFi	sheep	feces
RGVC188	2022NBT-11175_1	60180	NBT	HiFi	sheep	feces
RGVC189	2022NBT-1118	678525	NBT	HiFi	sheep	feces
RGVC190	2022NBT-111830	15944	NBT	HiFi	sheep	feces
RGVC191	2022NBT-1119	678461	NBT	HiFi	sheep	feces
RGVC192	2022NBT-111949	15902	NBT	HiFi	sheep	feces
RGVC193	2022NBT-11195	188964	NBT	HiFi	sheep	feces
RGVC194	2022NBT-112	954306	NBT	HiFi	sheep	feces
RGVC195	2022NBT-1120_1	50880	NBT	HiFi	sheep	feces
RGVC196	2022NBT-11201	188849	NBT	HiFi	sheep	feces
RGVC197	2022NBT-1121	677625	NBT	HiFi	sheep	feces
RGVC198	2022NBT-11223	188553	NBT	HiFi	sheep	feces
RGVC199	2022NBT-11225	188510	NBT	HiFi	sheep	feces
RGVC200	2022NBT-112465	15717	NBT	HiFi	sheep	feces
RGVC201	2022NBT-11249	188162	NBT	HiFi	sheep	feces
RGVC202	2022NBT-11259_1	38663	NBT	HiFi	sheep	feces
RGVC203	2022NBT-11263	187961	NBT	HiFi	sheep	feces
RGVC204	2022NBT-11287	187610	NBT	HiFi	sheep	feces
RGVC205	2022NBT-1129	676139	NBT	HiFi	sheep	feces
RGVC206	2022NBT-11294	187535	NBT	HiFi	sheep	feces
RGVC207	2022NBT-11296_1	78795	NBT	HiFi	sheep	feces
RGVC208	2022NBT-11310	187311	NBT	HiFi	sheep	feces
RGVC209	2022NBT-1132	675640	NBT	HiFi	sheep	feces
RGVC210	2022NBT-11327_1	55020	NBT	HiFi	sheep	feces
RGVC211	2022NBT-11332	187071	NBT	HiFi	sheep	feces
RGVC212	2022NBT-11334	187054	NBT	HiFi	sheep	feces
RGVC213	2022NBT-11339	186990	NBT	HiFi	sheep	feces
RGVC214	2022NBT-11348	186889	NBT	HiFi	sheep	feces
RGVC215	2022NBT-1136_1	40525	NBT	HiFi	sheep	feces
RGVC216	2022NBT-11391	186251	NBT	HiFi	sheep	feces
RGVC217	2022NBT-11406	186090	NBT	HiFi	sheep	feces
RGVC218	2022NBT-1141_1	52434	NBT	HiFi	sheep	feces
RGVC219	2022NBT-114144	15135	NBT	HiFi	sheep	feces
RGVC220	2022NBT-11426	185714	NBT	HiFi	sheep	feces
RGVC221	2022NBT-11437	185528	NBT	HiFi	sheep	feces
RGVC222	2022NBT-114386	15059	NBT	HiFi	sheep	feces
RGVC223	2022NBT-1144	673718	NBT	HiFi	sheep	feces
RGVC224	2022NBT-114425	15047	NBT	HiFi	sheep	feces
RGVC225	2022NBT-114508	15015	NBT	HiFi	sheep	feces
RGVC226	2022NBT-11459	185205	NBT	HiFi	sheep	feces
RGVC227	2022NBT-11465_1	45622	NBT	HiFi	sheep	feces
RGVC228	2022NBT-11479	185024	NBT	HiFi	sheep	feces
RGVC229	2022NBT-11485	184953	NBT	HiFi	sheep	feces
RGVC230	2022NBT-1149	673250	NBT	HiFi	sheep	feces
RGVC231	2022NBT-11498_1	36221	NBT	HiFi	sheep	feces
RGVC232	2022NBT-1150_1	65693	NBT	HiFi	sheep	feces
RGVC233	2022NBT-11506	184666	NBT	HiFi	sheep	feces
RGVC234	2022NBT-1151	672889	NBT	HiFi	sheep	feces
RGVC235	2022NBT-1152	672545	NBT	HiFi	sheep	feces
RGVC236	2022NBT-11525	184400	NBT	HiFi	sheep	feces
RGVC237	2022NBT-115430	14726	NBT	HiFi	sheep	feces
RGVC238	2022NBT-11548	184131	NBT	HiFi	sheep	feces
RGVC239	2022NBT-11553_1	36804	NBT	HiFi	sheep	feces
RGVC240	2022NBT-1157	671321	NBT	HiFi	sheep	feces
RGVC241	2022NBT-11574_1	105988	NBT	HiFi	sheep	feces
RGVC242	2022NBT-11585	183697	NBT	HiFi	sheep	feces
RGVC243	2022NBT-11591_1	45959	NBT	HiFi	sheep	feces
RGVC244	2022NBT-115912	14564	NBT	HiFi	sheep	feces
RGVC245	2022NBT-11592_1	31628	NBT	HiFi	sheep	feces
RGVC246	2022NBT-116019	14523	NBT	HiFi	sheep	feces
RGVC247	2022NBT-11606	183403	NBT	HiFi	sheep	feces
RGVC248	2022NBT-11609	183368	NBT	HiFi	sheep	feces
RGVC249	2022NBT-1162	670898	NBT	HiFi	sheep	feces
RGVC250	2022NBT-11621	183252	NBT	HiFi	sheep	feces
RGVC251	2022NBT-116234	14458	NBT	HiFi	sheep	feces
RGVC252	2022NBT-11624	183208	NBT	HiFi	sheep	feces
RGVC253	2022NBT-11625_1	64533	NBT	HiFi	sheep	feces
RGVC254	2022NBT-11627	183197	NBT	HiFi	sheep	feces
RGVC255	2022NBT-1163_1	41923	NBT	HiFi	sheep	feces
RGVC256	2022NBT-11637	183092	NBT	HiFi	sheep	feces
RGVC257	2022NBT-1165	670347	NBT	HiFi	sheep	feces
RGVC258	2022NBT-116770	14291	NBT	HiFi	sheep	feces
RGVC259	2022NBT-116825	14271	NBT	HiFi	sheep	feces
RGVC260	2022NBT-1169	669870	NBT	HiFi	sheep	feces
RGVC261	2022NBT-11699	182318	NBT	HiFi	sheep	feces
RGVC262	2022NBT-117	951688	NBT	HiFi	sheep	feces
RGVC263	2022NBT-1171	669167	NBT	HiFi	sheep	feces
RGVC264	2022NBT-11721	182076	NBT	HiFi	sheep	feces
RGVC265	2022NBT-117247	14141	NBT	HiFi	sheep	feces
RGVC266	2022NBT-117428	14079	NBT	HiFi	sheep	feces
RGVC267	2022NBT-11744	181851	NBT	HiFi	sheep	feces
RGVC268	2022NBT-11746_1	60062	NBT	HiFi	sheep	feces
RGVC269	2022NBT-11747	181847	NBT	HiFi	sheep	feces
RGVC270	2022NBT-11749	181836	NBT	HiFi	sheep	feces
RGVC271	2022NBT-1175	668548	NBT	HiFi	sheep	feces
RGVC272	2022NBT-11750	181814	NBT	HiFi	sheep	feces
RGVC273	2022NBT-1176	668111	NBT	HiFi	sheep	feces
RGVC274	2022NBT-11774	181487	NBT	HiFi	sheep	feces
RGVC275	2022NBT-117764	13971	NBT	HiFi	sheep	feces
RGVC276	2022NBT-1178	667480	NBT	HiFi	sheep	feces
RGVC277	2022NBT-11823	180910	NBT	HiFi	sheep	feces
RGVC278	2022NBT-11825_1	32835	NBT	HiFi	sheep	feces
RGVC279	2022NBT-118291	13797	NBT	HiFi	sheep	feces
RGVC280	2022NBT-1183	666817	NBT	HiFi	sheep	feces
RGVC281	2022NBT-1185	666704	NBT	HiFi	sheep	feces
RGVC282	2022NBT-1187	665705	NBT	HiFi	sheep	feces
RGVC283	2022NBT-118829	13638	NBT	HiFi	sheep	feces
RGVC284	2022NBT-11885	180242	NBT	HiFi	sheep	feces
RGVC285	2022NBT-1189	665359	NBT	HiFi	sheep	feces
RGVC286	2022NBT-118909	13609	NBT	HiFi	sheep	feces
RGVC287	2022NBT-119_1	50222	NBT	HiFi	sheep	feces
RGVC288	2022NBT-1191	665195	NBT	HiFi	sheep	feces
RGVC289	2022NBT-11911	179970	NBT	HiFi	sheep	feces
RGVC290	2022NBT-1192	664866	NBT	HiFi	sheep	feces
RGVC291	2022NBT-11929	179635	NBT	HiFi	sheep	feces
RGVC292	2022NBT-11933_1	61453	NBT	HiFi	sheep	feces
RGVC293	2022NBT-119334	13489	NBT	HiFi	sheep	feces
RGVC294	2022NBT-1195	664411	NBT	HiFi	sheep	feces
RGVC295	2022NBT-1196_1	34237	NBT	HiFi	sheep	feces
RGVC296	2022NBT-119606	13396	NBT	HiFi	sheep	feces
RGVC297	2022NBT-11966	179240	NBT	HiFi	sheep	feces
RGVC298	2022NBT-1197	663783	NBT	HiFi	sheep	feces
RGVC299	2022NBT-119795	13337	NBT	HiFi	sheep	feces
RGVC300	2022NBT-1199	663237	NBT	HiFi	sheep	feces
RGVC301	2022NBT-119922	13296	NBT	HiFi	sheep	feces
RGVC302	2022NBT-11996	178924	NBT	HiFi	sheep	feces
RGVC303	2022NBT-12	990766	NBT	HiFi	sheep	feces
RGVC304	2022NBT-1200	663158	NBT	HiFi	sheep	feces
RGVC305	2022NBT-1201_1	34295	NBT	HiFi	sheep	feces
RGVC306	2022NBT-1202	662662	NBT	HiFi	sheep	feces
RGVC307	2022NBT-1203	662233	NBT	HiFi	sheep	feces
RGVC308	2022NBT-120311	13174	NBT	HiFi	sheep	feces
RGVC309	2022NBT-12040	178377	NBT	HiFi	sheep	feces
RGVC310	2022NBT-120427	13142	NBT	HiFi	sheep	feces
RGVC311	2022NBT-1205	661613	NBT	HiFi	sheep	feces
RGVC312	2022NBT-12050	178230	NBT	HiFi	sheep	feces
RGVC313	2022NBT-12054	178181	NBT	HiFi	sheep	feces
RGVC314	2022NBT-120573	13101	NBT	HiFi	sheep	feces
RGVC315	2022NBT-120799	13040	NBT	HiFi	sheep	feces
RGVC316	2022NBT-120838	13028	NBT	HiFi	sheep	feces
RGVC317	2022NBT-1209	661226	NBT	HiFi	sheep	feces
RGVC318	2022NBT-12115_1	101489	NBT	HiFi	sheep	feces
RGVC319	2022NBT-12126_1	81452	NBT	HiFi	sheep	feces
RGVC320	2022NBT-121262	12895	NBT	HiFi	sheep	feces
RGVC321	2022NBT-12130	177378	NBT	HiFi	sheep	feces
RGVC322	2022NBT-12133	177266	NBT	HiFi	sheep	feces
RGVC323	2022NBT-121624_1	7661	NBT	HiFi	sheep	feces
RGVC324	2022NBT-1217	659995	NBT	HiFi	sheep	feces
RGVC325	2022NBT-122	947495	NBT	HiFi	sheep	feces
RGVC326	2022NBT-1220	659383	NBT	HiFi	sheep	feces
RGVC327	2022NBT-12206	176199	NBT	HiFi	sheep	feces
RGVC328	2022NBT-12207	176186	NBT	HiFi	sheep	feces
RGVC329	2022NBT-12228	175952	NBT	HiFi	sheep	feces
RGVC330	2022NBT-1224	658819	NBT	HiFi	sheep	feces
RGVC331	2022NBT-122577	12489	NBT	HiFi	sheep	feces
RGVC332	2022NBT-12259	175653	NBT	HiFi	sheep	feces
RGVC333	2022NBT-1226_1	50770	NBT	HiFi	sheep	feces
RGVC334	2022NBT-122969	12363	NBT	HiFi	sheep	feces
RGVC335	2022NBT-1231	657910	NBT	HiFi	sheep	feces
RGVC336	2022NBT-12330_1	42048	NBT	HiFi	sheep	feces
RGVC337	2022NBT-12352_1	29651	NBT	HiFi	sheep	feces
RGVC338	2022NBT-12369	174197	NBT	HiFi	sheep	feces
RGVC339	2022NBT-1237_1	33998	NBT	HiFi	sheep	feces
RGVC340	2022NBT-123730	12147	NBT	HiFi	sheep	feces
RGVC341	2022NBT-12387	174004	NBT	HiFi	sheep	feces
RGVC342	2022NBT-12393_1	30731	NBT	HiFi	sheep	feces
RGVC343	2022NBT-12410	173744	NBT	HiFi	sheep	feces
RGVC344	2022NBT-12423	173660	NBT	HiFi	sheep	feces
RGVC345	2022NBT-1243	656474	NBT	HiFi	sheep	feces
RGVC346	2022NBT-124319	11980	NBT	HiFi	sheep	feces
RGVC347	2022NBT-124324	11979	NBT	HiFi	sheep	feces
RGVC348	2022NBT-12436	173501	NBT	HiFi	sheep	feces
RGVC349	2022NBT-124426	11954	NBT	HiFi	sheep	feces
RGVC350	2022NBT-12445_1	41106	NBT	HiFi	sheep	feces
RGVC351	2022NBT-124538	11922	NBT	HiFi	sheep	feces
RGVC352	2022NBT-12455	173317	NBT	HiFi	sheep	feces
RGVC353	2022NBT-12457	173285	NBT	HiFi	sheep	feces
RGVC354	2022NBT-1246	655926	NBT	HiFi	sheep	feces
RGVC355	2022NBT-124601	11908	NBT	HiFi	sheep	feces
RGVC356	2022NBT-12468	173134	NBT	HiFi	sheep	feces
RGVC357	2022NBT-12475	173015	NBT	HiFi	sheep	feces
RGVC358	2022NBT-12483	172942	NBT	HiFi	sheep	feces
RGVC359	2022NBT-12495	172754	NBT	HiFi	sheep	feces
RGVC360	2022NBT-125_1	59756	NBT	HiFi	sheep	feces
RGVC361	2022NBT-12516_1	51234	NBT	HiFi	sheep	feces
RGVC362	2022NBT-125356	11698	NBT	HiFi	sheep	feces
RGVC363	2022NBT-12539	172230	NBT	HiFi	sheep	feces
RGVC364	2022NBT-1254	654200	NBT	HiFi	sheep	feces
RGVC365	2022NBT-1255	654098	NBT	HiFi	sheep	feces
RGVC366	2022NBT-12563	171995	NBT	HiFi	sheep	feces
RGVC367	2022NBT-12564	171988	NBT	HiFi	sheep	feces
RGVC368	2022NBT-12566	171977	NBT	HiFi	sheep	feces
RGVC369	2022NBT-125666	11618	NBT	HiFi	sheep	feces
RGVC370	2022NBT-1257	654022	NBT	HiFi	sheep	feces
RGVC371	2022NBT-12577_1	44379	NBT	HiFi	sheep	feces
RGVC372	2022NBT-1258	653489	NBT	HiFi	sheep	feces
RGVC373	2022NBT-12587_1	39943	NBT	HiFi	sheep	feces
RGVC374	2022NBT-12589_1	168648	NBT	HiFi	sheep	feces
RGVC375	2022NBT-126	945784	NBT	HiFi	sheep	feces
RGVC376	2022NBT-126266	11463	NBT	HiFi	sheep	feces
RGVC377	2022NBT-12628	171334	NBT	HiFi	sheep	feces
RGVC378	2022NBT-126358	11430	NBT	HiFi	sheep	feces
RGVC379	2022NBT-12636	171253	NBT	HiFi	sheep	feces
RGVC380	2022NBT-126475	11400	NBT	HiFi	sheep	feces
RGVC381	2022NBT-1266	651142	NBT	HiFi	sheep	feces
RGVC382	2022NBT-126696	11342	NBT	HiFi	sheep	feces
RGVC383	2022NBT-1267	651116	NBT	HiFi	sheep	feces
RGVC384	2022NBT-12672	170866	NBT	HiFi	sheep	feces
RGVC385	2022NBT-126720	11335	NBT	HiFi	sheep	feces
RGVC386	2022NBT-12676	170818	NBT	HiFi	sheep	feces
RGVC387	2022NBT-126760	11324	NBT	HiFi	sheep	feces
RGVC388	2022NBT-12716	170378	NBT	HiFi	sheep	feces
RGVC389	2022NBT-12724	170303	NBT	HiFi	sheep	feces
RGVC390	2022NBT-12727	170285	NBT	HiFi	sheep	feces
RGVC391	2022NBT-12743	170111	NBT	HiFi	sheep	feces
RGVC392	2022NBT-12745	170092	NBT	HiFi	sheep	feces
RGVC393	2022NBT-1275	649876	NBT	HiFi	sheep	feces
RGVC394	2022NBT-12757	169936	NBT	HiFi	sheep	feces
RGVC395	2022NBT-12761	169920	NBT	HiFi	sheep	feces
RGVC396	2022NBT-1278	649228	NBT	HiFi	sheep	feces
RGVC397	2022NBT-12781_1	63816	NBT	HiFi	sheep	feces
RGVC398	2022NBT-12783	169670	NBT	HiFi	sheep	feces
RGVC399	2022NBT-12792_1	53902	NBT	HiFi	sheep	feces
RGVC400	2022NBT-127995	11008	NBT	HiFi	sheep	feces
RGVC401	2022NBT-128	945231	NBT	HiFi	sheep	feces
RGVC402	2022NBT-1282	648246	NBT	HiFi	sheep	feces
RGVC403	2022NBT-12839	169058	NBT	HiFi	sheep	feces
RGVC404	2022NBT-12844	169033	NBT	HiFi	sheep	feces
RGVC405	2022NBT-12848	168960	NBT	HiFi	sheep	feces
RGVC406	2022NBT-12899	168439	NBT	HiFi	sheep	feces
RGVC407	2022NBT-1292	647353	NBT	HiFi	sheep	feces
RGVC408	2022NBT-12923	168149	NBT	HiFi	sheep	feces
RGVC409	2022NBT-12928_1	35587	NBT	HiFi	sheep	feces
RGVC410	2022NBT-12945	167886	NBT	HiFi	sheep	feces
RGVC411	2022NBT-1296	646780	NBT	HiFi	sheep	feces
RGVC412	2022NBT-12972	167646	NBT	HiFi	sheep	feces
RGVC413	2022NBT-12977	167600	NBT	HiFi	sheep	feces
RGVC414	2022NBT-1298	645928	NBT	HiFi	sheep	feces
RGVC415	2022NBT-12980	167577	NBT	HiFi	sheep	feces
RGVC416	2022NBT-12987	167534	NBT	HiFi	sheep	feces
RGVC417	2022NBT-12989	167518	NBT	HiFi	sheep	feces
RGVC418	2022NBT-12992	167490	NBT	HiFi	sheep	feces
RGVC419	2022NBT-129957	10501	NBT	HiFi	sheep	feces
RGVC420	2022NBT-13	989924	NBT	HiFi	sheep	feces
RGVC421	2022NBT-130	943745	NBT	HiFi	sheep	feces
RGVC422	2022NBT-1300_1	30516	NBT	HiFi	sheep	feces
RGVC423	2022NBT-1304	644292	NBT	HiFi	sheep	feces
RGVC424	2022NBT-130422	10376	NBT	HiFi	sheep	feces
RGVC425	2022NBT-13046	166976	NBT	HiFi	sheep	feces
RGVC426	2022NBT-130892	10248	NBT	HiFi	sheep	feces
RGVC427	2022NBT-1309	643615	NBT	HiFi	sheep	feces
RGVC428	2022NBT-13104	166283	NBT	HiFi	sheep	feces
RGVC429	2022NBT-13113	166188	NBT	HiFi	sheep	feces
RGVC430	2022NBT-13114	166184	NBT	HiFi	sheep	feces
RGVC431	2022NBT-1312_1	54111	NBT	HiFi	sheep	feces
RGVC432	2022NBT-13126_1	48223	NBT	HiFi	sheep	feces
RGVC433	2022NBT-13132	165970	NBT	HiFi	sheep	feces
RGVC434	2022NBT-13141	165835	NBT	HiFi	sheep	feces
RGVC435	2022NBT-13142	165833	NBT	HiFi	sheep	feces
RGVC436	2022NBT-13144	165827	NBT	HiFi	sheep	feces
RGVC437	2022NBT-132015	9967	NBT	HiFi	sheep	feces
RGVC438	2022NBT-13209	165154	NBT	HiFi	sheep	feces
RGVC439	2022NBT-132348	9882	NBT	HiFi	sheep	feces
RGVC440	2022NBT-132384	9874	NBT	HiFi	sheep	feces
RGVC441	2022NBT-13240	164793	NBT	HiFi	sheep	feces
RGVC442	2022NBT-132490	9848	NBT	HiFi	sheep	feces
RGVC443	2022NBT-1325	639946	NBT	HiFi	sheep	feces
RGVC444	2022NBT-13255	164647	NBT	HiFi	sheep	feces
RGVC445	2022NBT-13298	164191	NBT	HiFi	sheep	feces
RGVC446	2022NBT-133	942114	NBT	HiFi	sheep	feces
RGVC447	2022NBT-13309	164107	NBT	HiFi	sheep	feces
RGVC448	2022NBT-1332_1	92930	NBT	HiFi	sheep	feces
RGVC449	2022NBT-13323_1	69698	NBT	HiFi	sheep	feces
RGVC450	2022NBT-13336	163861	NBT	HiFi	sheep	feces
RGVC451	2022NBT-13340	163816	NBT	HiFi	sheep	feces
RGVC452	2022NBT-13346_1	50949	NBT	HiFi	sheep	feces
RGVC453	2022NBT-1335	638056	NBT	HiFi	sheep	feces
RGVC454	2022NBT-13355_1	40125	NBT	HiFi	sheep	feces
RGVC455	2022NBT-13367	163540	NBT	HiFi	sheep	feces
RGVC456	2022NBT-1338	637672	NBT	HiFi	sheep	feces
RGVC457	2022NBT-13403	163106	NBT	HiFi	sheep	feces
RGVC458	2022NBT-13408_1	47190	NBT	HiFi	sheep	feces
RGVC459	2022NBT-13418_1	51745	NBT	HiFi	sheep	feces
RGVC460	2022NBT-1342	636522	NBT	HiFi	sheep	feces
RGVC461	2022NBT-13420	162947	NBT	HiFi	sheep	feces
RGVC462	2022NBT-13424_1	43593	NBT	HiFi	sheep	feces
RGVC463	2022NBT-1343	636493	NBT	HiFi	sheep	feces
RGVC464	2022NBT-1344	636206	NBT	HiFi	sheep	feces
RGVC465	2022NBT-13442	162710	NBT	HiFi	sheep	feces
RGVC466	2022NBT-13448	162695	NBT	HiFi	sheep	feces
RGVC467	2022NBT-13476	162381	NBT	HiFi	sheep	feces
RGVC468	2022NBT-13493	162255	NBT	HiFi	sheep	feces
RGVC469	2022NBT-13495	162229	NBT	HiFi	sheep	feces
RGVC470	2022NBT-1350	635185	NBT	HiFi	sheep	feces
RGVC471	2022NBT-135192	9234	NBT	HiFi	sheep	feces
RGVC472	2022NBT-1352	634972	NBT	HiFi	sheep	feces
RGVC473	2022NBT-13523	161955	NBT	HiFi	sheep	feces
RGVC474	2022NBT-13529	161862	NBT	HiFi	sheep	feces
RGVC475	2022NBT-135456	9172	NBT	HiFi	sheep	feces
RGVC476	2022NBT-13547_1	62180	NBT	HiFi	sheep	feces
RGVC477	2022NBT-1356	634293	NBT	HiFi	sheep	feces
RGVC478	2022NBT-13564	161391	NBT	HiFi	sheep	feces
RGVC479	2022NBT-1357	634204	NBT	HiFi	sheep	feces
RGVC480	2022NBT-13570	161364	NBT	HiFi	sheep	feces
RGVC481	2022NBT-13590	161179	NBT	HiFi	sheep	feces
RGVC482	2022NBT-136000	9053	NBT	HiFi	sheep	feces
RGVC483	2022NBT-136045	9041	NBT	HiFi	sheep	feces
RGVC484	2022NBT-13613_1	90675	NBT	HiFi	sheep	feces
RGVC485	2022NBT-13636	160677	NBT	HiFi	sheep	feces
RGVC486	2022NBT-1364	632988	NBT	HiFi	sheep	feces
RGVC487	2022NBT-13640	160634	NBT	HiFi	sheep	feces
RGVC488	2022NBT-136434	8952	NBT	HiFi	sheep	feces
RGVC489	2022NBT-13647	160552	NBT	HiFi	sheep	feces
RGVC490	2022NBT-136485	8940	NBT	HiFi	sheep	feces
RGVC491	2022NBT-1365	632721	NBT	HiFi	sheep	feces
RGVC492	2022NBT-13667	160309	NBT	HiFi	sheep	feces
RGVC493	2022NBT-13671	160279	NBT	HiFi	sheep	feces
RGVC494	2022NBT-13675	160260	NBT	HiFi	sheep	feces
RGVC495	2022NBT-1368	632022	NBT	HiFi	sheep	feces
RGVC496	2022NBT-13683_1	42728	NBT	HiFi	sheep	feces
RGVC497	2022NBT-13693	160140	NBT	HiFi	sheep	feces
RGVC498	2022NBT-13721	159913	NBT	HiFi	sheep	feces
RGVC499	2022NBT-1373	631343	NBT	HiFi	sheep	feces
RGVC500	2022NBT-1375_2	33667	NBT	HiFi	sheep	feces
RGVC501	2022NBT-13755	159706	NBT	HiFi	sheep	feces
RGVC502	2022NBT-13760	159647	NBT	HiFi	sheep	feces
RGVC503	2022NBT-13766_1	54780	NBT	HiFi	sheep	feces
RGVC504	2022NBT-1377	630611	NBT	HiFi	sheep	feces
RGVC505	2022NBT-13783	159456	NBT	HiFi	sheep	feces
RGVC506	2022NBT-1379	630217	NBT	HiFi	sheep	feces
RGVC507	2022NBT-13802	159264	NBT	HiFi	sheep	feces
RGVC508	2022NBT-13807_1	37965	NBT	HiFi	sheep	feces
RGVC509	2022NBT-13808	159219	NBT	HiFi	sheep	feces
RGVC510	2022NBT-1382_1	36848	NBT	HiFi	sheep	feces
RGVC511	2022NBT-1384	628781	NBT	HiFi	sheep	feces
RGVC512	2022NBT-13844	158827	NBT	HiFi	sheep	feces
RGVC513	2022NBT-1385	628667	NBT	HiFi	sheep	feces
RGVC514	2022NBT-13866	158647	NBT	HiFi	sheep	feces
RGVC515	2022NBT-13868	158639	NBT	HiFi	sheep	feces
RGVC516	2022NBT-1390	626813	NBT	HiFi	sheep	feces
RGVC517	2022NBT-139054	8375	NBT	HiFi	sheep	feces
RGVC518	2022NBT-13925	158087	NBT	HiFi	sheep	feces
RGVC519	2022NBT-13927	158073	NBT	HiFi	sheep	feces
RGVC520	2022NBT-139282	8328	NBT	HiFi	sheep	feces
RGVC521	2022NBT-1393	626341	NBT	HiFi	sheep	feces
RGVC522	2022NBT-13931	158052	NBT	HiFi	sheep	feces
RGVC523	2022NBT-13953	157899	NBT	HiFi	sheep	feces
RGVC524	2022NBT-1396	626161	NBT	HiFi	sheep	feces
RGVC525	2022NBT-139702	8240	NBT	HiFi	sheep	feces
RGVC526	2022NBT-14	989803	NBT	HiFi	sheep	feces
RGVC527	2022NBT-14002	157454	NBT	HiFi	sheep	feces
RGVC528	2022NBT-14009_1	133350	NBT	HiFi	sheep	feces
RGVC529	2022NBT-14014	157298	NBT	HiFi	sheep	feces
RGVC530	2022NBT-1403	625486	NBT	HiFi	sheep	feces
RGVC531	2022NBT-14036_1	43920	NBT	HiFi	sheep	feces
RGVC532	2022NBT-14039	157089	NBT	HiFi	sheep	feces
RGVC533	2022NBT-1404	625311	NBT	HiFi	sheep	feces
RGVC534	2022NBT-14044_1	52865	NBT	HiFi	sheep	feces
RGVC535	2022NBT-1405	624999	NBT	HiFi	sheep	feces
RGVC536	2022NBT-14067	156823	NBT	HiFi	sheep	feces
RGVC537	2022NBT-14074_1	34819	NBT	HiFi	sheep	feces
RGVC538	2022NBT-140830	8025	NBT	HiFi	sheep	feces
RGVC539	2022NBT-141	938744	NBT	HiFi	sheep	feces
RGVC540	2022NBT-14100_1	48456	NBT	HiFi	sheep	feces
RGVC541	2022NBT-141140	7972	NBT	HiFi	sheep	feces
RGVC542	2022NBT-14118_1	51685	NBT	HiFi	sheep	feces
RGVC543	2022NBT-14118_2	44665	NBT	HiFi	sheep	feces
RGVC544	2022NBT-14124	156251	NBT	HiFi	sheep	feces
RGVC545	2022NBT-14127_1	48309	NBT	HiFi	sheep	feces
RGVC546	2022NBT-1413	623498	NBT	HiFi	sheep	feces
RGVC547	2022NBT-14138	156139	NBT	HiFi	sheep	feces
RGVC548	2022NBT-14139_1	130519	NBT	HiFi	sheep	feces
RGVC549	2022NBT-141522	7905	NBT	HiFi	sheep	feces
RGVC550	2022NBT-1416	622653	NBT	HiFi	sheep	feces
RGVC551	2022NBT-14169_1	149108	NBT	HiFi	sheep	feces
RGVC552	2022NBT-14183	155773	NBT	HiFi	sheep	feces
RGVC553	2022NBT-14204	155530	NBT	HiFi	sheep	feces
RGVC554	2022NBT-14229	155311	NBT	HiFi	sheep	feces
RGVC555	2022NBT-14235_1	32433	NBT	HiFi	sheep	feces
RGVC556	2022NBT-14244	155172	NBT	HiFi	sheep	feces
RGVC557	2022NBT-1425	620882	NBT	HiFi	sheep	feces
RGVC558	2022NBT-14262_1	34605	NBT	HiFi	sheep	feces
RGVC559	2022NBT-14263_1	46701	NBT	HiFi	sheep	feces
RGVC560	2022NBT-14268	154994	NBT	HiFi	sheep	feces
RGVC561	2022NBT-142929	7635	NBT	HiFi	sheep	feces
RGVC562	2022NBT-143009	7618	NBT	HiFi	sheep	feces
RGVC563	2022NBT-14305	154667	NBT	HiFi	sheep	feces
RGVC564	2022NBT-1431	619858	NBT	HiFi	sheep	feces
RGVC565	2022NBT-14314	154614	NBT	HiFi	sheep	feces
RGVC566	2022NBT-143185	7584	NBT	HiFi	sheep	feces
RGVC567	2022NBT-14328	154424	NBT	HiFi	sheep	feces
RGVC568	2022NBT-14330	154412	NBT	HiFi	sheep	feces
RGVC569	2022NBT-1434	619508	NBT	HiFi	sheep	feces
RGVC570	2022NBT-14343	154254	NBT	HiFi	sheep	feces
RGVC571	2022NBT-14380	153906	NBT	HiFi	sheep	feces
RGVC572	2022NBT-14396	153752	NBT	HiFi	sheep	feces
RGVC573	2022NBT-14419	153570	NBT	HiFi	sheep	feces
RGVC574	2022NBT-14430	153480	NBT	HiFi	sheep	feces
RGVC575	2022NBT-14445	153317	NBT	HiFi	sheep	feces
RGVC576	2022NBT-14455	153256	NBT	HiFi	sheep	feces
RGVC577	2022NBT-1446_1	41725	NBT	HiFi	sheep	feces
RGVC578	2022NBT-14463_1	41416	NBT	HiFi	sheep	feces
RGVC579	2022NBT-1447	617339	NBT	HiFi	sheep	feces
RGVC580	2022NBT-144765	7281	NBT	HiFi	sheep	feces
RGVC581	2022NBT-14510	152762	NBT	HiFi	sheep	feces
RGVC582	2022NBT-1452	616056	NBT	HiFi	sheep	feces
RGVC583	2022NBT-14521	152709	NBT	HiFi	sheep	feces
RGVC584	2022NBT-14529	152664	NBT	HiFi	sheep	feces
RGVC585	2022NBT-1453	616011	NBT	HiFi	sheep	feces
RGVC586	2022NBT-14536	152631	NBT	HiFi	sheep	feces
RGVC587	2022NBT-14539	152582	NBT	HiFi	sheep	feces
RGVC588	2022NBT-14547	152532	NBT	HiFi	sheep	feces
RGVC589	2022NBT-14552	152485	NBT	HiFi	sheep	feces
RGVC590	2022NBT-14564	152404	NBT	HiFi	sheep	feces
RGVC591	2022NBT-1459_1	40985	NBT	HiFi	sheep	feces
RGVC592	2022NBT-14590	152077	NBT	HiFi	sheep	feces
RGVC593	2022NBT-14602	151992	NBT	HiFi	sheep	feces
RGVC594	2022NBT-14611	151937	NBT	HiFi	sheep	feces
RGVC595	2022NBT-1462	615103	NBT	HiFi	sheep	feces
RGVC596	2022NBT-14639_1	39454	NBT	HiFi	sheep	feces
RGVC597	2022NBT-14641	151658	NBT	HiFi	sheep	feces
RGVC598	2022NBT-1465	614643	NBT	HiFi	sheep	feces
RGVC599	2022NBT-1466	614575	NBT	HiFi	sheep	feces
RGVC600	2022NBT-14667	151439	NBT	HiFi	sheep	feces
RGVC601	2022NBT-14678	151343	NBT	HiFi	sheep	feces
RGVC602	2022NBT-1468	614011	NBT	HiFi	sheep	feces
RGVC603	2022NBT-1469	613920	NBT	HiFi	sheep	feces
RGVC604	2022NBT-147	936429	NBT	HiFi	sheep	feces
RGVC605	2022NBT-14724	150906	NBT	HiFi	sheep	feces
RGVC606	2022NBT-14730	150837	NBT	HiFi	sheep	feces
RGVC607	2022NBT-14738_1	35359	NBT	HiFi	sheep	feces
RGVC608	2022NBT-1474	613659	NBT	HiFi	sheep	feces
RGVC609	2022NBT-14746	150643	NBT	HiFi	sheep	feces
RGVC610	2022NBT-1476	613154	NBT	HiFi	sheep	feces
RGVC611	2022NBT-14784_1	134765	NBT	HiFi	sheep	feces
RGVC612	2022NBT-14796	150180	NBT	HiFi	sheep	feces
RGVC613	2022NBT-14799	150129	NBT	HiFi	sheep	feces
RGVC614	2022NBT-148	935313	NBT	HiFi	sheep	feces
RGVC615	2022NBT-1481	612835	NBT	HiFi	sheep	feces
RGVC616	2022NBT-14812	150035	NBT	HiFi	sheep	feces
RGVC617	2022NBT-14815_1	39787	NBT	HiFi	sheep	feces
RGVC618	2022NBT-14831	149845	NBT	HiFi	sheep	feces
RGVC619	2022NBT-14849	149649	NBT	HiFi	sheep	feces
RGVC620	2022NBT-14852	149608	NBT	HiFi	sheep	feces
RGVC621	2022NBT-14895	149309	NBT	HiFi	sheep	feces
RGVC622	2022NBT-149	935141	NBT	HiFi	sheep	feces
RGVC623	2022NBT-14905	149161	NBT	HiFi	sheep	feces
RGVC624	2022NBT-14906	149155	NBT	HiFi	sheep	feces
RGVC625	2022NBT-14909	149121	NBT	HiFi	sheep	feces
RGVC626	2022NBT-1493	611477	NBT	HiFi	sheep	feces
RGVC627	2022NBT-14941_1	35196	NBT	HiFi	sheep	feces
RGVC628	2022NBT-149510	6444	NBT	HiFi	sheep	feces
RGVC629	2022NBT-14967	148551	NBT	HiFi	sheep	feces
RGVC630	2022NBT-14971	148517	NBT	HiFi	sheep	feces
RGVC631	2022NBT-1498	611207	NBT	HiFi	sheep	feces
RGVC632	2022NBT-1499	611052	NBT	HiFi	sheep	feces
RGVC633	2022NBT-15	989495	NBT	HiFi	sheep	feces
RGVC634	2022NBT-150	934833	NBT	HiFi	sheep	feces
RGVC635	2022NBT-1500	610781	NBT	HiFi	sheep	feces
RGVC636	2022NBT-15003	148237	NBT	HiFi	sheep	feces
RGVC637	2022NBT-15029	148026	NBT	HiFi	sheep	feces
RGVC638	2022NBT-15055	147808	NBT	HiFi	sheep	feces
RGVC639	2022NBT-15077	147627	NBT	HiFi	sheep	feces
RGVC640	2022NBT-15086	147528	NBT	HiFi	sheep	feces
RGVC641	2022NBT-15089	147502	NBT	HiFi	sheep	feces
RGVC642	2022NBT-15092	147448	NBT	HiFi	sheep	feces
RGVC643	2022NBT-15095_1	61693	NBT	HiFi	sheep	feces
RGVC644	2022NBT-151	934519	NBT	HiFi	sheep	feces
RGVC645	2022NBT-1511_1	52046	NBT	HiFi	sheep	feces
RGVC646	2022NBT-1512	608286	NBT	HiFi	sheep	feces
RGVC647	2022NBT-1513	608190	NBT	HiFi	sheep	feces
RGVC648	2022NBT-15144_1	89576	NBT	HiFi	sheep	feces
RGVC649	2022NBT-15149	146985	NBT	HiFi	sheep	feces
RGVC650	2022NBT-15157_1	28506	NBT	HiFi	sheep	feces
RGVC651	2022NBT-1516	607883	NBT	HiFi	sheep	feces
RGVC652	2022NBT-15172	146784	NBT	HiFi	sheep	feces
RGVC653	2022NBT-151772	6094	NBT	HiFi	sheep	feces
RGVC654	2022NBT-1518	607526	NBT	HiFi	sheep	feces
RGVC655	2022NBT-15181	146723	NBT	HiFi	sheep	feces
RGVC656	2022NBT-15184	146692	NBT	HiFi	sheep	feces
RGVC657	2022NBT-15187	146667	NBT	HiFi	sheep	feces
RGVC658	2022NBT-15192	146594	NBT	HiFi	sheep	feces
RGVC659	2022NBT-15196_1	53929	NBT	HiFi	sheep	feces
RGVC660	2022NBT-15198	146559	NBT	HiFi	sheep	feces
RGVC661	2022NBT-152	934133	NBT	HiFi	sheep	feces
RGVC662	2022NBT-15209_1	44058	NBT	HiFi	sheep	feces
RGVC663	2022NBT-15224	146314	NBT	HiFi	sheep	feces
RGVC664	2022NBT-15227	146259	NBT	HiFi	sheep	feces
RGVC665	2022NBT-15228	146259	NBT	HiFi	sheep	feces
RGVC666	2022NBT-15236_1	127821	NBT	HiFi	sheep	feces
RGVC667	2022NBT-15248	146123	NBT	HiFi	sheep	feces
RGVC668	2022NBT-15260_1	66561	NBT	HiFi	sheep	feces
RGVC669	2022NBT-1528	606692	NBT	HiFi	sheep	feces
RGVC670	2022NBT-1529	606369	NBT	HiFi	sheep	feces
RGVC671	2022NBT-15293	145692	NBT	HiFi	sheep	feces
RGVC672	2022NBT-153_1	33502	NBT	HiFi	sheep	feces
RGVC673	2022NBT-1531_1	33533	NBT	HiFi	sheep	feces
RGVC674	2022NBT-15321	145477	NBT	HiFi	sheep	feces
RGVC675	2022NBT-15340_1	36320	NBT	HiFi	sheep	feces
RGVC676	2022NBT-15366	145103	NBT	HiFi	sheep	feces
RGVC677	2022NBT-15394	144955	NBT	HiFi	sheep	feces
RGVC678	2022NBT-154	933941	NBT	HiFi	sheep	feces
RGVC679	2022NBT-1540	605473	NBT	HiFi	sheep	feces
RGVC680	2022NBT-15406_1	42119	NBT	HiFi	sheep	feces
RGVC681	2022NBT-15412_2	46788	NBT	HiFi	sheep	feces
RGVC682	2022NBT-15413	144866	NBT	HiFi	sheep	feces
RGVC683	2022NBT-15415	144861	NBT	HiFi	sheep	feces
RGVC684	2022NBT-1542	604990	NBT	HiFi	sheep	feces
RGVC685	2022NBT-15423	144818	NBT	HiFi	sheep	feces
RGVC686	2022NBT-15429_1	87146	NBT	HiFi	sheep	feces
RGVC687	2022NBT-15447	144672	NBT	HiFi	sheep	feces
RGVC688	2022NBT-15453	144632	NBT	HiFi	sheep	feces
RGVC689	2022NBT-15457	144622	NBT	HiFi	sheep	feces
RGVC690	2022NBT-15462_1	45992	NBT	HiFi	sheep	feces
RGVC691	2022NBT-154697	5660	NBT	HiFi	sheep	feces
RGVC692	2022NBT-1547	604203	NBT	HiFi	sheep	feces
RGVC693	2022NBT-15476	144462	NBT	HiFi	sheep	feces
RGVC694	2022NBT-154770	5650	NBT	HiFi	sheep	feces
RGVC695	2022NBT-154948	5626	NBT	HiFi	sheep	feces
RGVC696	2022NBT-15495	144321	NBT	HiFi	sheep	feces
RGVC697	2022NBT-15500_1	46604	NBT	HiFi	sheep	feces
RGVC698	2022NBT-155221	5593	NBT	HiFi	sheep	feces
RGVC699	2022NBT-15523_1	40609	NBT	HiFi	sheep	feces
RGVC700	2022NBT-15526	144097	NBT	HiFi	sheep	feces
RGVC701	2022NBT-15555_1	31431	NBT	HiFi	sheep	feces
RGVC702	2022NBT-1556_1	68186	NBT	HiFi	sheep	feces
RGVC703	2022NBT-155747	5515	NBT	HiFi	sheep	feces
RGVC704	2022NBT-1558	602568	NBT	HiFi	sheep	feces
RGVC705	2022NBT-15592	143576	NBT	HiFi	sheep	feces
RGVC706	2022NBT-15593	143567	NBT	HiFi	sheep	feces
RGVC707	2022NBT-156_1	37038	NBT	HiFi	sheep	feces
RGVC708	2022NBT-1563	601921	NBT	HiFi	sheep	feces
RGVC709	2022NBT-156353	5437	NBT	HiFi	sheep	feces
RGVC710	2022NBT-15644	143262	NBT	HiFi	sheep	feces
RGVC711	2022NBT-15657	143151	NBT	HiFi	sheep	feces
RGVC712	2022NBT-15662	143108	NBT	HiFi	sheep	feces
RGVC713	2022NBT-15687_1	72844	NBT	HiFi	sheep	feces
RGVC714	2022NBT-1571	601086	NBT	HiFi	sheep	feces
RGVC715	2022NBT-1572	601027	NBT	HiFi	sheep	feces
RGVC716	2022NBT-15723	142541	NBT	HiFi	sheep	feces
RGVC717	2022NBT-1573_1	48353	NBT	HiFi	sheep	feces
RGVC718	2022NBT-15732	142456	NBT	HiFi	sheep	feces
RGVC719	2022NBT-15733	142455	NBT	HiFi	sheep	feces
RGVC720	2022NBT-1574_1	38736	NBT	HiFi	sheep	feces
RGVC721	2022NBT-15744	142357	NBT	HiFi	sheep	feces
RGVC722	2022NBT-15747	142331	NBT	HiFi	sheep	feces
RGVC723	2022NBT-15767_1	30860	NBT	HiFi	sheep	feces
RGVC724	2022NBT-15768	142127	NBT	HiFi	sheep	feces
RGVC725	2022NBT-1577	600129	NBT	HiFi	sheep	feces
RGVC726	2022NBT-15770	142121	NBT	HiFi	sheep	feces
RGVC727	2022NBT-15774	142085	NBT	HiFi	sheep	feces
RGVC728	2022NBT-1578_1	44536	NBT	HiFi	sheep	feces
RGVC729	2022NBT-1579	599896	NBT	HiFi	sheep	feces
RGVC730	2022NBT-15812	141726	NBT	HiFi	sheep	feces
RGVC731	2022NBT-15816	141695	NBT	HiFi	sheep	feces
RGVC732	2022NBT-1584	599370	NBT	HiFi	sheep	feces
RGVC733	2022NBT-15855	141396	NBT	HiFi	sheep	feces
RGVC734	2022NBT-15860	141374	NBT	HiFi	sheep	feces
RGVC735	2022NBT-15888	141169	NBT	HiFi	sheep	feces
RGVC736	2022NBT-1589	598527	NBT	HiFi	sheep	feces
RGVC737	2022NBT-15910_1	124792	NBT	HiFi	sheep	feces
RGVC738	2022NBT-15911	140995	NBT	HiFi	sheep	feces
RGVC739	2022NBT-15913	140989	NBT	HiFi	sheep	feces
RGVC740	2022NBT-1593	598253	NBT	HiFi	sheep	feces
RGVC741	2022NBT-15934	140753	NBT	HiFi	sheep	feces
RGVC742	2022NBT-1594	598234	NBT	HiFi	sheep	feces
RGVC743	2022NBT-15951	140670	NBT	HiFi	sheep	feces
RGVC744	2022NBT-15953	140659	NBT	HiFi	sheep	feces
RGVC745	2022NBT-15955	140639	NBT	HiFi	sheep	feces
RGVC746	2022NBT-15959	140550	NBT	HiFi	sheep	feces
RGVC747	2022NBT-1597	597244	NBT	HiFi	sheep	feces
RGVC748	2022NBT-15977	140401	NBT	HiFi	sheep	feces
RGVC749	2022NBT-15986_1	83112	NBT	HiFi	sheep	feces
RGVC750	2022NBT-1601	595460	NBT	HiFi	sheep	feces
RGVC751	2022NBT-1602	595456	NBT	HiFi	sheep	feces
RGVC752	2022NBT-16026	140039	NBT	HiFi	sheep	feces
RGVC753	2022NBT-16047	139934	NBT	HiFi	sheep	feces
RGVC754	2022NBT-16055	139897	NBT	HiFi	sheep	feces
RGVC755	2022NBT-16058_1	42363	NBT	HiFi	sheep	feces
RGVC756	2022NBT-1606	594986	NBT	HiFi	sheep	feces
RGVC757	2022NBT-16064_1	36767	NBT	HiFi	sheep	feces
RGVC758	2022NBT-1607	594943	NBT	HiFi	sheep	feces
RGVC759	2022NBT-1609	594831	NBT	HiFi	sheep	feces
RGVC760	2022NBT-161	930316	NBT	HiFi	sheep	feces
RGVC761	2022NBT-16100	139461	NBT	HiFi	sheep	feces
RGVC762	2022NBT-16120_1	41266	NBT	HiFi	sheep	feces
RGVC763	2022NBT-1613	594406	NBT	HiFi	sheep	feces
RGVC764	2022NBT-16137	139188	NBT	HiFi	sheep	feces
RGVC765	2022NBT-162	929908	NBT	HiFi	sheep	feces
RGVC766	2022NBT-16200_1	33039	NBT	HiFi	sheep	feces
RGVC767	2022NBT-16206	138651	NBT	HiFi	sheep	feces
RGVC768	2022NBT-16210	138602	NBT	HiFi	sheep	feces
RGVC769	2022NBT-1622	593150	NBT	HiFi	sheep	feces
RGVC770	2022NBT-16243	138315	NBT	HiFi	sheep	feces
RGVC771	2022NBT-16251	138278	NBT	HiFi	sheep	feces
RGVC772	2022NBT-16276	138111	NBT	HiFi	sheep	feces
RGVC773	2022NBT-16281_1	43860	NBT	HiFi	sheep	feces
RGVC774	2022NBT-163	929873	NBT	HiFi	sheep	feces
RGVC775	2022NBT-16307	137880	NBT	HiFi	sheep	feces
RGVC776	2022NBT-16326_1	60559	NBT	HiFi	sheep	feces
RGVC777	2022NBT-1633_1	31426	NBT	HiFi	sheep	feces
RGVC778	2022NBT-16350	137616	NBT	HiFi	sheep	feces
RGVC779	2022NBT-16374_1	37709	NBT	HiFi	sheep	feces
RGVC780	2022NBT-1642	590206	NBT	HiFi	sheep	feces
RGVC781	2022NBT-16434	137066	NBT	HiFi	sheep	feces
RGVC782	2022NBT-16438_1	39240	NBT	HiFi	sheep	feces
RGVC783	2022NBT-1645_1	28435	NBT	HiFi	sheep	feces
RGVC784	2022NBT-1646	589438	NBT	HiFi	sheep	feces
RGVC785	2022NBT-16471_1	63361	NBT	HiFi	sheep	feces
RGVC786	2022NBT-1649	588529	NBT	HiFi	sheep	feces
RGVC787	2022NBT-16492	136495	NBT	HiFi	sheep	feces
RGVC788	2022NBT-16499	136455	NBT	HiFi	sheep	feces
RGVC789	2022NBT-165	928998	NBT	HiFi	sheep	feces
RGVC790	2022NBT-1650	588492	NBT	HiFi	sheep	feces
RGVC791	2022NBT-16502_1	41571	NBT	HiFi	sheep	feces
RGVC792	2022NBT-16519	136350	NBT	HiFi	sheep	feces
RGVC793	2022NBT-1652_1	63799	NBT	HiFi	sheep	feces
RGVC794	2022NBT-16525	136304	NBT	HiFi	sheep	feces
RGVC795	2022NBT-16535	136228	NBT	HiFi	sheep	feces
RGVC796	2022NBT-1654_1	82015	NBT	HiFi	sheep	feces
RGVC797	2022NBT-16543	136130	NBT	HiFi	sheep	feces
RGVC798	2022NBT-16547	136095	NBT	HiFi	sheep	feces
RGVC799	2022NBT-16557	136071	NBT	HiFi	sheep	feces
RGVC800	2022NBT-1659	586661	NBT	HiFi	sheep	feces
RGVC801	2022NBT-1660	586577	NBT	HiFi	sheep	feces
RGVC802	2022NBT-16619	135546	NBT	HiFi	sheep	feces
RGVC803	2022NBT-16653	135306	NBT	HiFi	sheep	feces
RGVC804	2022NBT-16669	135229	NBT	HiFi	sheep	feces
RGVC805	2022NBT-16673	135199	NBT	HiFi	sheep	feces
RGVC806	2022NBT-16674	135195	NBT	HiFi	sheep	feces
RGVC807	2022NBT-16676_2	45769	NBT	HiFi	sheep	feces
RGVC808	2022NBT-167	928617	NBT	HiFi	sheep	feces
RGVC809	2022NBT-1670	585442	NBT	HiFi	sheep	feces
RGVC810	2022NBT-16707	134993	NBT	HiFi	sheep	feces
RGVC811	2022NBT-16712	134954	NBT	HiFi	sheep	feces
RGVC812	2022NBT-16715_1	55572	NBT	HiFi	sheep	feces
RGVC813	2022NBT-16721	134907	NBT	HiFi	sheep	feces
RGVC814	2022NBT-16722	134905	NBT	HiFi	sheep	feces
RGVC815	2022NBT-1673	585149	NBT	HiFi	sheep	feces
RGVC816	2022NBT-16739	134813	NBT	HiFi	sheep	feces
RGVC817	2022NBT-1674	584982	NBT	HiFi	sheep	feces
RGVC818	2022NBT-16768_1	37337	NBT	HiFi	sheep	feces
RGVC819	2022NBT-1678	584087	NBT	HiFi	sheep	feces
RGVC820	2022NBT-16844	134171	NBT	HiFi	sheep	feces
RGVC821	2022NBT-1687	581925	NBT	HiFi	sheep	feces
RGVC822	2022NBT-16870_1	84156	NBT	HiFi	sheep	feces
RGVC823	2022NBT-1688	581828	NBT	HiFi	sheep	feces
RGVC824	2022NBT-16883	133880	NBT	HiFi	sheep	feces
RGVC825	2022NBT-16884	133871	NBT	HiFi	sheep	feces
RGVC826	2022NBT-169	928275	NBT	HiFi	sheep	feces
RGVC827	2022NBT-16903	133674	NBT	HiFi	sheep	feces
RGVC828	2022NBT-1691	581592	NBT	HiFi	sheep	feces
RGVC829	2022NBT-16910	133612	NBT	HiFi	sheep	feces
RGVC830	2022NBT-1692	581502	NBT	HiFi	sheep	feces
RGVC831	2022NBT-16929	133446	NBT	HiFi	sheep	feces
RGVC832	2022NBT-1696	580994	NBT	HiFi	sheep	feces
RGVC833	2022NBT-16962	133190	NBT	HiFi	sheep	feces
RGVC834	2022NBT-16973	133099	NBT	HiFi	sheep	feces
RGVC835	2022NBT-16980_1	50165	NBT	HiFi	sheep	feces
RGVC836	2022NBT-16997	132956	NBT	HiFi	sheep	feces
RGVC837	2022NBT-16998	132953	NBT	HiFi	sheep	feces
RGVC838	2022NBT-170	928238	NBT	HiFi	sheep	feces
RGVC839	2022NBT-17009	132899	NBT	HiFi	sheep	feces
RGVC840	2022NBT-17014	132873	NBT	HiFi	sheep	feces
RGVC841	2022NBT-17021_1	119100	NBT	HiFi	sheep	feces
RGVC842	2022NBT-17027	132819	NBT	HiFi	sheep	feces
RGVC843	2022NBT-17028_1	35002	NBT	HiFi	sheep	feces
RGVC844	2022NBT-17049	132662	NBT	HiFi	sheep	feces
RGVC845	2022NBT-1705_1	38594	NBT	HiFi	sheep	feces
RGVC846	2022NBT-17063_1	54656	NBT	HiFi	sheep	feces
RGVC847	2022NBT-1709	579775	NBT	HiFi	sheep	feces
RGVC848	2022NBT-17107	132322	NBT	HiFi	sheep	feces
RGVC849	2022NBT-17110	132297	NBT	HiFi	sheep	feces
RGVC850	2022NBT-17115	132282	NBT	HiFi	sheep	feces
RGVC851	2022NBT-1717_1	37719	NBT	HiFi	sheep	feces
RGVC852	2022NBT-17197	131757	NBT	HiFi	sheep	feces
RGVC853	2022NBT-172	927999	NBT	HiFi	sheep	feces
RGVC854	2022NBT-1722	576578	NBT	HiFi	sheep	feces
RGVC855	2022NBT-1726	576177	NBT	HiFi	sheep	feces
RGVC856	2022NBT-1727	576042	NBT	HiFi	sheep	feces
RGVC857	2022NBT-17278	131206	NBT	HiFi	sheep	feces
RGVC858	2022NBT-17288	131117	NBT	HiFi	sheep	feces
RGVC859	2022NBT-173	927804	NBT	HiFi	sheep	feces
RGVC860	2022NBT-17300	131070	NBT	HiFi	sheep	feces
RGVC861	2022NBT-17309_1	81696	NBT	HiFi	sheep	feces
RGVC862	2022NBT-17337	130885	NBT	HiFi	sheep	feces
RGVC863	2022NBT-1734	574582	NBT	HiFi	sheep	feces
RGVC864	2022NBT-17340	130875	NBT	HiFi	sheep	feces
RGVC865	2022NBT-17355_1	36543	NBT	HiFi	sheep	feces
RGVC866	2022NBT-1736_1	56666	NBT	HiFi	sheep	feces
RGVC867	2022NBT-17410	130433	NBT	HiFi	sheep	feces
RGVC868	2022NBT-17414	130417	NBT	HiFi	sheep	feces
RGVC869	2022NBT-1742_1	42328	NBT	HiFi	sheep	feces
RGVC870	2022NBT-17428	130336	NBT	HiFi	sheep	feces
RGVC871	2022NBT-1746	572770	NBT	HiFi	sheep	feces
RGVC872	2022NBT-17468	129984	NBT	HiFi	sheep	feces
RGVC873	2022NBT-1748	572674	NBT	HiFi	sheep	feces
RGVC874	2022NBT-17490	129896	NBT	HiFi	sheep	feces
RGVC875	2022NBT-1750	572555	NBT	HiFi	sheep	feces
RGVC876	2022NBT-17508	129732	NBT	HiFi	sheep	feces
RGVC877	2022NBT-1752	571988	NBT	HiFi	sheep	feces
RGVC878	2022NBT-1753	571687	NBT	HiFi	sheep	feces
RGVC879	2022NBT-1755	571576	NBT	HiFi	sheep	feces
RGVC880	2022NBT-17568	129358	NBT	HiFi	sheep	feces
RGVC881	2022NBT-17569	129351	NBT	HiFi	sheep	feces
RGVC882	2022NBT-1758_1	37745	NBT	HiFi	sheep	feces
RGVC883	2022NBT-17594	129104	NBT	HiFi	sheep	feces
RGVC884	2022NBT-17623	128921	NBT	HiFi	sheep	feces
RGVC885	2022NBT-17625	128914	NBT	HiFi	sheep	feces
RGVC886	2022NBT-1763_1	81171	NBT	HiFi	sheep	feces
RGVC887	2022NBT-17632	128877	NBT	HiFi	sheep	feces
RGVC888	2022NBT-1765	569619	NBT	HiFi	sheep	feces
RGVC889	2022NBT-17657	128740	NBT	HiFi	sheep	feces
RGVC890	2022NBT-1766	569586	NBT	HiFi	sheep	feces
RGVC891	2022NBT-17667_1	42791	NBT	HiFi	sheep	feces
RGVC892	2022NBT-17680	128611	NBT	HiFi	sheep	feces
RGVC893	2022NBT-177	927243	NBT	HiFi	sheep	feces
RGVC894	2022NBT-17724	128368	NBT	HiFi	sheep	feces
RGVC895	2022NBT-17733	128326	NBT	HiFi	sheep	feces
RGVC896	2022NBT-1774	568786	NBT	HiFi	sheep	feces
RGVC897	2022NBT-17742	128221	NBT	HiFi	sheep	feces
RGVC898	2022NBT-17747_1	91361	NBT	HiFi	sheep	feces
RGVC899	2022NBT-17763_1	36523	NBT	HiFi	sheep	feces
RGVC900	2022NBT-17764	128073	NBT	HiFi	sheep	feces
RGVC901	2022NBT-1777	568085	NBT	HiFi	sheep	feces
RGVC902	2022NBT-17772	127984	NBT	HiFi	sheep	feces
RGVC903	2022NBT-17776	127938	NBT	HiFi	sheep	feces
RGVC904	2022NBT-17786	127801	NBT	HiFi	sheep	feces
RGVC905	2022NBT-17789_1	79410	NBT	HiFi	sheep	feces
RGVC906	2022NBT-17796_1	54309	NBT	HiFi	sheep	feces
RGVC907	2022NBT-17800	127708	NBT	HiFi	sheep	feces
RGVC908	2022NBT-17809	127646	NBT	HiFi	sheep	feces
RGVC909	2022NBT-1781	567307	NBT	HiFi	sheep	feces
RGVC910	2022NBT-17845	127404	NBT	HiFi	sheep	feces
RGVC911	2022NBT-1786	566112	NBT	HiFi	sheep	feces
RGVC912	2022NBT-1788	565591	NBT	HiFi	sheep	feces
RGVC913	2022NBT-17886	127096	NBT	HiFi	sheep	feces
RGVC914	2022NBT-1789	565548	NBT	HiFi	sheep	feces
RGVC915	2022NBT-17895_1	87552	NBT	HiFi	sheep	feces
RGVC916	2022NBT-17897	127012	NBT	HiFi	sheep	feces
RGVC917	2022NBT-179	926506	NBT	HiFi	sheep	feces
RGVC918	2022NBT-17901	126990	NBT	HiFi	sheep	feces
RGVC919	2022NBT-17959	126650	NBT	HiFi	sheep	feces
RGVC920	2022NBT-17961_1	97162	NBT	HiFi	sheep	feces
RGVC921	2022NBT-1797	564297	NBT	HiFi	sheep	feces
RGVC922	2022NBT-17971	126599	NBT	HiFi	sheep	feces
RGVC923	2022NBT-17973	126593	NBT	HiFi	sheep	feces
RGVC924	2022NBT-18001	126378	NBT	HiFi	sheep	feces
RGVC925	2022NBT-1801	563436	NBT	HiFi	sheep	feces
RGVC926	2022NBT-18012	126311	NBT	HiFi	sheep	feces
RGVC927	2022NBT-1802_1	44258	NBT	HiFi	sheep	feces
RGVC928	2022NBT-18024_1	40692	NBT	HiFi	sheep	feces
RGVC929	2022NBT-18037	126141	NBT	HiFi	sheep	feces
RGVC930	2022NBT-18065	126001	NBT	HiFi	sheep	feces
RGVC931	2022NBT-18075	125947	NBT	HiFi	sheep	feces
RGVC932	2022NBT-18082	125872	NBT	HiFi	sheep	feces
RGVC933	2022NBT-18093_1	37633	NBT	HiFi	sheep	feces
RGVC934	2022NBT-1810_1	36518	NBT	HiFi	sheep	feces
RGVC935	2022NBT-18118	125654	NBT	HiFi	sheep	feces
RGVC936	2022NBT-1813	561995	NBT	HiFi	sheep	feces
RGVC937	2022NBT-1814	561812	NBT	HiFi	sheep	feces
RGVC938	2022NBT-18153	125371	NBT	HiFi	sheep	feces
RGVC939	2022NBT-1820	560532	NBT	HiFi	sheep	feces
RGVC940	2022NBT-18207	124963	NBT	HiFi	sheep	feces
RGVC941	2022NBT-18211	124948	NBT	HiFi	sheep	feces
RGVC942	2022NBT-1822_1	50210	NBT	HiFi	sheep	feces
RGVC943	2022NBT-18225	124848	NBT	HiFi	sheep	feces
RGVC944	2022NBT-1823	560460	NBT	HiFi	sheep	feces
RGVC945	2022NBT-1824	560421	NBT	HiFi	sheep	feces
RGVC946	2022NBT-1827	560222	NBT	HiFi	sheep	feces
RGVC947	2022NBT-18293	124346	NBT	HiFi	sheep	feces
RGVC948	2022NBT-18296_1	63211	NBT	HiFi	sheep	feces
RGVC949	2022NBT-18314	124246	NBT	HiFi	sheep	feces
RGVC950	2022NBT-1832	559489	NBT	HiFi	sheep	feces
RGVC951	2022NBT-18334	124114	NBT	HiFi	sheep	feces
RGVC952	2022NBT-1836	559029	NBT	HiFi	sheep	feces
RGVC953	2022NBT-18366	123889	NBT	HiFi	sheep	feces
RGVC954	2022NBT-1837_1	32711	NBT	HiFi	sheep	feces
RGVC955	2022NBT-18370_1	78678	NBT	HiFi	sheep	feces
RGVC956	2022NBT-1839	558787	NBT	HiFi	sheep	feces
RGVC957	2022NBT-18392	123700	NBT	HiFi	sheep	feces
RGVC958	2022NBT-18396	123681	NBT	HiFi	sheep	feces
RGVC959	2022NBT-1840_1	43269	NBT	HiFi	sheep	feces
RGVC960	2022NBT-18403	123615	NBT	HiFi	sheep	feces
RGVC961	2022NBT-18410_1	33225	NBT	HiFi	sheep	feces
RGVC962	2022NBT-1844_1	19735	NBT	HiFi	sheep	feces
RGVC963	2022NBT-18443	123349	NBT	HiFi	sheep	feces
RGVC964	2022NBT-18452	123294	NBT	HiFi	sheep	feces
RGVC965	2022NBT-1847	557616	NBT	HiFi	sheep	feces
RGVC966	2022NBT-18476	123130	NBT	HiFi	sheep	feces
RGVC967	2022NBT-1849	557548	NBT	HiFi	sheep	feces
RGVC968	2022NBT-18491	123059	NBT	HiFi	sheep	feces
RGVC969	2022NBT-18497	123011	NBT	HiFi	sheep	feces
RGVC970	2022NBT-1850	557520	NBT	HiFi	sheep	feces
RGVC971	2022NBT-18510	122908	NBT	HiFi	sheep	feces
RGVC972	2022NBT-18519_1	36017	NBT	HiFi	sheep	feces
RGVC973	2022NBT-1852	557280	NBT	HiFi	sheep	feces
RGVC974	2022NBT-1854	556813	NBT	HiFi	sheep	feces
RGVC975	2022NBT-18540	122696	NBT	HiFi	sheep	feces
RGVC976	2022NBT-18551	122640	NBT	HiFi	sheep	feces
RGVC977	2022NBT-18559	122584	NBT	HiFi	sheep	feces
RGVC978	2022NBT-1856	556718	NBT	HiFi	sheep	feces
RGVC979	2022NBT-1857	556657	NBT	HiFi	sheep	feces
RGVC980	2022NBT-1858	556639	NBT	HiFi	sheep	feces
RGVC981	2022NBT-186	924488	NBT	HiFi	sheep	feces
RGVC982	2022NBT-1860	556439	NBT	HiFi	sheep	feces
RGVC983	2022NBT-18608	122254	NBT	HiFi	sheep	feces
RGVC984	2022NBT-1862_1	50901	NBT	HiFi	sheep	feces
RGVC985	2022NBT-18638	122091	NBT	HiFi	sheep	feces
RGVC986	2022NBT-1864	556145	NBT	HiFi	sheep	feces
RGVC987	2022NBT-18649	122017	NBT	HiFi	sheep	feces
RGVC988	2022NBT-18657_1	39920	NBT	HiFi	sheep	feces
RGVC989	2022NBT-1866	555831	NBT	HiFi	sheep	feces
RGVC990	2022NBT-18690_1	50025	NBT	HiFi	sheep	feces
RGVC991	2022NBT-187	924401	NBT	HiFi	sheep	feces
RGVC992	2022NBT-1871	554992	NBT	HiFi	sheep	feces
RGVC993	2022NBT-1872_1	39878	NBT	HiFi	sheep	feces
RGVC994	2022NBT-18720	121598	NBT	HiFi	sheep	feces
RGVC995	2022NBT-1874	554705	NBT	HiFi	sheep	feces
RGVC996	2022NBT-18741_1	58741	NBT	HiFi	sheep	feces
RGVC997	2022NBT-18751	121452	NBT	HiFi	sheep	feces
RGVC998	2022NBT-18754_1	26949	NBT	HiFi	sheep	feces
RGVC999	2022NBT-1876	554567	NBT	HiFi	sheep	feces
RGVC1000	2022NBT-18762	121377	NBT	HiFi	sheep	feces
RGVC1001	2022NBT-1877	554296	NBT	HiFi	sheep	feces
RGVC1002	2022NBT-18784_1	28768	NBT	HiFi	sheep	feces
RGVC1003	2022NBT-18791	121178	NBT	HiFi	sheep	feces
RGVC1004	2022NBT-188	924324	NBT	HiFi	sheep	feces
RGVC1005	2022NBT-1880	554258	NBT	HiFi	sheep	feces
RGVC1006	2022NBT-18801	121095	NBT	HiFi	sheep	feces
RGVC1007	2022NBT-1884_1	44877	NBT	HiFi	sheep	feces
RGVC1008	2022NBT-18845_1	59835	NBT	HiFi	sheep	feces
RGVC1009	2022NBT-18849_1	116436	NBT	HiFi	sheep	feces
RGVC1010	2022NBT-1885	553202	NBT	HiFi	sheep	feces
RGVC1011	2022NBT-18866	120678	NBT	HiFi	sheep	feces
RGVC1012	2022NBT-18885	120558	NBT	HiFi	sheep	feces
RGVC1013	2022NBT-18889	120555	NBT	HiFi	sheep	feces
RGVC1014	2022NBT-18926	120390	NBT	HiFi	sheep	feces
RGVC1015	2022NBT-1895_1	37936	NBT	HiFi	sheep	feces
RGVC1016	2022NBT-18952	120250	NBT	HiFi	sheep	feces
RGVC1017	2022NBT-19012	119898	NBT	HiFi	sheep	feces
RGVC1018	2022NBT-19013	119891	NBT	HiFi	sheep	feces
RGVC1019	2022NBT-1903	550879	NBT	HiFi	sheep	feces
RGVC1020	2022NBT-19037	119758	NBT	HiFi	sheep	feces
RGVC1021	2022NBT-1904_1	63482	NBT	HiFi	sheep	feces
RGVC1022	2022NBT-19041_1	40090	NBT	HiFi	sheep	feces
RGVC1023	2022NBT-19045	119737	NBT	HiFi	sheep	feces
RGVC1024	2022NBT-19061	119630	NBT	HiFi	sheep	feces
RGVC1025	2022NBT-19062_1	55666	NBT	HiFi	sheep	feces
RGVC1026	2022NBT-19066_1	80057	NBT	HiFi	sheep	feces
RGVC1027	2022NBT-19067_1	81639	NBT	HiFi	sheep	feces
RGVC1028	2022NBT-1907	550262	NBT	HiFi	sheep	feces
RGVC1029	2022NBT-19081	119518	NBT	HiFi	sheep	feces
RGVC1030	2022NBT-19091	119466	NBT	HiFi	sheep	feces
RGVC1031	2022NBT-191	923672	NBT	HiFi	sheep	feces
RGVC1032	2022NBT-1911	549716	NBT	HiFi	sheep	feces
RGVC1033	2022NBT-19120	119314	NBT	HiFi	sheep	feces
RGVC1034	2022NBT-1914	549285	NBT	HiFi	sheep	feces
RGVC1035	2022NBT-19142	119177	NBT	HiFi	sheep	feces
RGVC1036	2022NBT-19148_1	67222	NBT	HiFi	sheep	feces
RGVC1037	2022NBT-19163	119065	NBT	HiFi	sheep	feces
RGVC1038	2022NBT-19177	118994	NBT	HiFi	sheep	feces
RGVC1039	2022NBT-19191	118870	NBT	HiFi	sheep	feces
RGVC1040	2022NBT-19193	118863	NBT	HiFi	sheep	feces
RGVC1041	2022NBT-1921_1	38194	NBT	HiFi	sheep	feces
RGVC1042	2022NBT-19216	118722	NBT	HiFi	sheep	feces
RGVC1043	2022NBT-19217_1	39827	NBT	HiFi	sheep	feces
RGVC1044	2022NBT-19230	118625	NBT	HiFi	sheep	feces
RGVC1045	2022NBT-19250	118518	NBT	HiFi	sheep	feces
RGVC1046	2022NBT-19257	118483	NBT	HiFi	sheep	feces
RGVC1047	2022NBT-1926	547918	NBT	HiFi	sheep	feces
RGVC1048	2022NBT-19273	118415	NBT	HiFi	sheep	feces
RGVC1049	2022NBT-1929	547813	NBT	HiFi	sheep	feces
RGVC1050	2022NBT-19323_1	47770	NBT	HiFi	sheep	feces
RGVC1051	2022NBT-19349	118113	NBT	HiFi	sheep	feces
RGVC1052	2022NBT-19352	118094	NBT	HiFi	sheep	feces
RGVC1053	2022NBT-19367	118023	NBT	HiFi	sheep	feces
RGVC1054	2022NBT-19370	118019	NBT	HiFi	sheep	feces
RGVC1055	2022NBT-19378	117984	NBT	HiFi	sheep	feces
RGVC1056	2022NBT-19395	117876	NBT	HiFi	sheep	feces
RGVC1057	2022NBT-19426	117673	NBT	HiFi	sheep	feces
RGVC1058	2022NBT-19431_1	80035	NBT	HiFi	sheep	feces
RGVC1059	2022NBT-1944	546604	NBT	HiFi	sheep	feces
RGVC1060	2022NBT-19471	117477	NBT	HiFi	sheep	feces
RGVC1061	2022NBT-19495	117358	NBT	HiFi	sheep	feces
RGVC1062	2022NBT-195	920285	NBT	HiFi	sheep	feces
RGVC1063	2022NBT-1951	545692	NBT	HiFi	sheep	feces
RGVC1064	2022NBT-19521	117178	NBT	HiFi	sheep	feces
RGVC1065	2022NBT-19575	116872	NBT	HiFi	sheep	feces
RGVC1066	2022NBT-1958	544849	NBT	HiFi	sheep	feces
RGVC1067	2022NBT-19589_1	27647	NBT	HiFi	sheep	feces
RGVC1068	2022NBT-196	919700	NBT	HiFi	sheep	feces
RGVC1069	2022NBT-19606	116691	NBT	HiFi	sheep	feces
RGVC1070	2022NBT-19628	116565	NBT	HiFi	sheep	feces
RGVC1071	2022NBT-19631_1	25251	NBT	HiFi	sheep	feces
RGVC1072	2022NBT-19638	116524	NBT	HiFi	sheep	feces
RGVC1073	2022NBT-19649	116495	NBT	HiFi	sheep	feces
RGVC1074	2022NBT-19657	116474	NBT	HiFi	sheep	feces
RGVC1075	2022NBT-19659	116468	NBT	HiFi	sheep	feces
RGVC1076	2022NBT-19676	116364	NBT	HiFi	sheep	feces
RGVC1077	2022NBT-1968_1	67885	NBT	HiFi	sheep	feces
RGVC1078	2022NBT-19695	116284	NBT	HiFi	sheep	feces
RGVC1079	2022NBT-1971	543529	NBT	HiFi	sheep	feces
RGVC1080	2022NBT-1972	543127	NBT	HiFi	sheep	feces
RGVC1081	2022NBT-1973	543119	NBT	HiFi	sheep	feces
RGVC1082	2022NBT-19738	116075	NBT	HiFi	sheep	feces
RGVC1083	2022NBT-19754	115984	NBT	HiFi	sheep	feces
RGVC1084	2022NBT-19763	115917	NBT	HiFi	sheep	feces
RGVC1085	2022NBT-19773	115841	NBT	HiFi	sheep	feces
RGVC1086	2022NBT-19780	115788	NBT	HiFi	sheep	feces
RGVC1087	2022NBT-19796	115693	NBT	HiFi	sheep	feces
RGVC1088	2022NBT-19827_1	65952	NBT	HiFi	sheep	feces
RGVC1089	2022NBT-19850	115386	NBT	HiFi	sheep	feces
RGVC1090	2022NBT-19853	115371	NBT	HiFi	sheep	feces
RGVC1091	2022NBT-19890	115097	NBT	HiFi	sheep	feces
RGVC1092	2022NBT-199_1	36130	NBT	HiFi	sheep	feces
RGVC1093	2022NBT-1991	540594	NBT	HiFi	sheep	feces
RGVC1094	2022NBT-19910	114978	NBT	HiFi	sheep	feces
RGVC1095	2022NBT-1996	539872	NBT	HiFi	sheep	feces
RGVC1096	2022NBT-1998	539682	NBT	HiFi	sheep	feces
RGVC1097	2022NBT-19991	114584	NBT	HiFi	sheep	feces
RGVC1098	2022NBT-2	996576	NBT	HiFi	sheep	feces
RGVC1099	2022NBT-20	988620	NBT	HiFi	sheep	feces
RGVC1100	2022NBT-2000_1	75240	NBT	HiFi	sheep	feces
RGVC1101	2022NBT-2002	539295	NBT	HiFi	sheep	feces
RGVC1102	2022NBT-20043	114285	NBT	HiFi	sheep	feces
RGVC1103	2022NBT-20053	114255	NBT	HiFi	sheep	feces
RGVC1104	2022NBT-2006_1	43801	NBT	HiFi	sheep	feces
RGVC1105	2022NBT-20070	114128	NBT	HiFi	sheep	feces
RGVC1106	2022NBT-20095	113995	NBT	HiFi	sheep	feces
RGVC1107	2022NBT-2010_2	40106	NBT	HiFi	sheep	feces
RGVC1108	2022NBT-20104	113920	NBT	HiFi	sheep	feces
RGVC1109	2022NBT-20114	113870	NBT	HiFi	sheep	feces
RGVC1110	2022NBT-20125	113811	NBT	HiFi	sheep	feces
RGVC1111	2022NBT-2014	538163	NBT	HiFi	sheep	feces
RGVC1112	2022NBT-20146	113710	NBT	HiFi	sheep	feces
RGVC1113	2022NBT-20147	113703	NBT	HiFi	sheep	feces
RGVC1114	2022NBT-20151	113691	NBT	HiFi	sheep	feces
RGVC1115	2022NBT-2016	538054	NBT	HiFi	sheep	feces
RGVC1116	2022NBT-20173	113628	NBT	HiFi	sheep	feces
RGVC1117	2022NBT-202	915450	NBT	HiFi	sheep	feces
RGVC1118	2022NBT-20215	113458	NBT	HiFi	sheep	feces
RGVC1119	2022NBT-20237_1	72985	NBT	HiFi	sheep	feces
RGVC1120	2022NBT-2024	537364	NBT	HiFi	sheep	feces
RGVC1121	2022NBT-20246	113315	NBT	HiFi	sheep	feces
RGVC1122	2022NBT-20260	113251	NBT	HiFi	sheep	feces
RGVC1123	2022NBT-2028	537226	NBT	HiFi	sheep	feces
RGVC1124	2022NBT-203	914781	NBT	HiFi	sheep	feces
RGVC1125	2022NBT-20300_1	76745	NBT	HiFi	sheep	feces
RGVC1126	2022NBT-2031	536831	NBT	HiFi	sheep	feces
RGVC1127	2022NBT-20344	112843	NBT	HiFi	sheep	feces
RGVC1128	2022NBT-2036	536060	NBT	HiFi	sheep	feces
RGVC1129	2022NBT-2037	535766	NBT	HiFi	sheep	feces
RGVC1130	2022NBT-20377	112639	NBT	HiFi	sheep	feces
RGVC1131	2022NBT-2038	535541	NBT	HiFi	sheep	feces
RGVC1132	2022NBT-20398	112540	NBT	HiFi	sheep	feces
RGVC1133	2022NBT-204_2	28828	NBT	HiFi	sheep	feces
RGVC1134	2022NBT-20405	112518	NBT	HiFi	sheep	feces
RGVC1135	2022NBT-20407_2	20233	NBT	HiFi	sheep	feces
RGVC1136	2022NBT-20453	112249	NBT	HiFi	sheep	feces
RGVC1137	2022NBT-20463_1	77930	NBT	HiFi	sheep	feces
RGVC1138	2022NBT-20464	112195	NBT	HiFi	sheep	feces
RGVC1139	2022NBT-2047	535004	NBT	HiFi	sheep	feces
RGVC1140	2022NBT-20473	112148	NBT	HiFi	sheep	feces
RGVC1141	2022NBT-20479_1	54255	NBT	HiFi	sheep	feces
RGVC1142	2022NBT-20483	112103	NBT	HiFi	sheep	feces
RGVC1143	2022NBT-205	914486	NBT	HiFi	sheep	feces
RGVC1144	2022NBT-2050	534864	NBT	HiFi	sheep	feces
RGVC1145	2022NBT-20521_1	92645	NBT	HiFi	sheep	feces
RGVC1146	2022NBT-2053	534119	NBT	HiFi	sheep	feces
RGVC1147	2022NBT-2055	534041	NBT	HiFi	sheep	feces
RGVC1148	2022NBT-20550	111834	NBT	HiFi	sheep	feces
RGVC1149	2022NBT-2056	533904	NBT	HiFi	sheep	feces
RGVC1150	2022NBT-20567_1	76449	NBT	HiFi	sheep	feces
RGVC1151	2022NBT-2057	533771	NBT	HiFi	sheep	feces
RGVC1152	2022NBT-20570_1	32978	NBT	HiFi	sheep	feces
RGVC1153	2022NBT-2058	533738	NBT	HiFi	sheep	feces
RGVC1154	2022NBT-20599	111598	NBT	HiFi	sheep	feces
RGVC1155	2022NBT-20609	111526	NBT	HiFi	sheep	feces
RGVC1156	2022NBT-2061	533568	NBT	HiFi	sheep	feces
RGVC1157	2022NBT-20611	111525	NBT	HiFi	sheep	feces
RGVC1158	2022NBT-2062	533559	NBT	HiFi	sheep	feces
RGVC1159	2022NBT-20639	111347	NBT	HiFi	sheep	feces
RGVC1160	2022NBT-2064	533347	NBT	HiFi	sheep	feces
RGVC1161	2022NBT-20666	111250	NBT	HiFi	sheep	feces
RGVC1162	2022NBT-20668	111245	NBT	HiFi	sheep	feces
RGVC1163	2022NBT-2067_1	238613	NBT	HiFi	sheep	feces
RGVC1164	2022NBT-2068	532505	NBT	HiFi	sheep	feces
RGVC1165	2022NBT-20681	111208	NBT	HiFi	sheep	feces
RGVC1166	2022NBT-2069	532499	NBT	HiFi	sheep	feces
RGVC1167	2022NBT-20693	111170	NBT	HiFi	sheep	feces
RGVC1168	2022NBT-20699	111156	NBT	HiFi	sheep	feces
RGVC1169	2022NBT-20720	111042	NBT	HiFi	sheep	feces
RGVC1170	2022NBT-20725	111034	NBT	HiFi	sheep	feces
RGVC1171	2022NBT-20729	111018	NBT	HiFi	sheep	feces
RGVC1172	2022NBT-2073	532214	NBT	HiFi	sheep	feces
RGVC1173	2022NBT-20747	110948	NBT	HiFi	sheep	feces
RGVC1174	2022NBT-2079	531891	NBT	HiFi	sheep	feces
RGVC1175	2022NBT-20792	110729	NBT	HiFi	sheep	feces
RGVC1176	2022NBT-20794	110710	NBT	HiFi	sheep	feces
RGVC1177	2022NBT-20804	110651	NBT	HiFi	sheep	feces
RGVC1178	2022NBT-2087	531271	NBT	HiFi	sheep	feces
RGVC1179	2022NBT-20877	110300	NBT	HiFi	sheep	feces
RGVC1180	2022NBT-20892	110244	NBT	HiFi	sheep	feces
RGVC1181	2022NBT-2092	530449	NBT	HiFi	sheep	feces
RGVC1182	2022NBT-20922	110094	NBT	HiFi	sheep	feces
RGVC1183	2022NBT-20925_1	43045	NBT	HiFi	sheep	feces
RGVC1184	2022NBT-20934	110046	NBT	HiFi	sheep	feces
RGVC1185	2022NBT-20938	110028	NBT	HiFi	sheep	feces
RGVC1186	2022NBT-20985_1	67878	NBT	HiFi	sheep	feces
RGVC1187	2022NBT-20990	109831	NBT	HiFi	sheep	feces
RGVC1188	2022NBT-21	988187	NBT	HiFi	sheep	feces
RGVC1189	2022NBT-210	913381	NBT	HiFi	sheep	feces
RGVC1190	2022NBT-21018	109751	NBT	HiFi	sheep	feces
RGVC1191	2022NBT-21045	109637	NBT	HiFi	sheep	feces
RGVC1192	2022NBT-2105_1	39877	NBT	HiFi	sheep	feces
RGVC1193	2022NBT-2109	529277	NBT	HiFi	sheep	feces
RGVC1194	2022NBT-211	912603	NBT	HiFi	sheep	feces
RGVC1195	2022NBT-21125	109253	NBT	HiFi	sheep	feces
RGVC1196	2022NBT-2113_1	47047	NBT	HiFi	sheep	feces
RGVC1197	2022NBT-2114_1	44663	NBT	HiFi	sheep	feces
RGVC1198	2022NBT-21145	109158	NBT	HiFi	sheep	feces
RGVC1199	2022NBT-21174_1	39516	NBT	HiFi	sheep	feces
RGVC1200	2022NBT-21179_1	45523	NBT	HiFi	sheep	feces
RGVC1201	2022NBT-21186	108968	NBT	HiFi	sheep	feces
RGVC1202	2022NBT-21206	108900	NBT	HiFi	sheep	feces
RGVC1203	2022NBT-2121	527881	NBT	HiFi	sheep	feces
RGVC1204	2022NBT-21215	108859	NBT	HiFi	sheep	feces
RGVC1205	2022NBT-2124	527762	NBT	HiFi	sheep	feces
RGVC1206	2022NBT-21289	108572	NBT	HiFi	sheep	feces
RGVC1207	2022NBT-21295	108560	NBT	HiFi	sheep	feces
RGVC1208	2022NBT-21313_1	41398	NBT	HiFi	sheep	feces
RGVC1209	2022NBT-2133	526900	NBT	HiFi	sheep	feces
RGVC1210	2022NBT-21354	108292	NBT	HiFi	sheep	feces
RGVC1211	2022NBT-21362	108255	NBT	HiFi	sheep	feces
RGVC1212	2022NBT-214	911811	NBT	HiFi	sheep	feces
RGVC1213	2022NBT-2141	526322	NBT	HiFi	sheep	feces
RGVC1214	2022NBT-21419	107936	NBT	HiFi	sheep	feces
RGVC1215	2022NBT-21424	107910	NBT	HiFi	sheep	feces
RGVC1216	2022NBT-21437	107882	NBT	HiFi	sheep	feces
RGVC1217	2022NBT-21464	107734	NBT	HiFi	sheep	feces
RGVC1218	2022NBT-2147_1	33650	NBT	HiFi	sheep	feces
RGVC1219	2022NBT-2148	525573	NBT	HiFi	sheep	feces
RGVC1220	2022NBT-2151	525180	NBT	HiFi	sheep	feces
RGVC1221	2022NBT-21516	107571	NBT	HiFi	sheep	feces
RGVC1222	2022NBT-2152	525126	NBT	HiFi	sheep	feces
RGVC1223	2022NBT-21520	107552	NBT	HiFi	sheep	feces
RGVC1224	2022NBT-21527	107527	NBT	HiFi	sheep	feces
RGVC1225	2022NBT-21545	107440	NBT	HiFi	sheep	feces
RGVC1226	2022NBT-21548	107428	NBT	HiFi	sheep	feces
RGVC1227	2022NBT-2155	524810	NBT	HiFi	sheep	feces
RGVC1228	2022NBT-21556	107400	NBT	HiFi	sheep	feces
RGVC1229	2022NBT-21569	107342	NBT	HiFi	sheep	feces
RGVC1230	2022NBT-21570	107331	NBT	HiFi	sheep	feces
RGVC1231	2022NBT-21581	107286	NBT	HiFi	sheep	feces
RGVC1232	2022NBT-21595_1	27686	NBT	HiFi	sheep	feces
RGVC1233	2022NBT-21599_1	42549	NBT	HiFi	sheep	feces
RGVC1234	2022NBT-216	911563	NBT	HiFi	sheep	feces
RGVC1235	2022NBT-21620	107131	NBT	HiFi	sheep	feces
RGVC1236	2022NBT-2163_1	42777	NBT	HiFi	sheep	feces
RGVC1237	2022NBT-21637	107022	NBT	HiFi	sheep	feces
RGVC1238	2022NBT-21639	107009	NBT	HiFi	sheep	feces
RGVC1239	2022NBT-21665	106884	NBT	HiFi	sheep	feces
RGVC1240	2022NBT-21680	106805	NBT	HiFi	sheep	feces
RGVC1241	2022NBT-21755	106448	NBT	HiFi	sheep	feces
RGVC1242	2022NBT-21762_1	36782	NBT	HiFi	sheep	feces
RGVC1243	2022NBT-21780	106339	NBT	HiFi	sheep	feces
RGVC1244	2022NBT-21793	106266	NBT	HiFi	sheep	feces
RGVC1245	2022NBT-218	910998	NBT	HiFi	sheep	feces
RGVC1246	2022NBT-21822	106142	NBT	HiFi	sheep	feces
RGVC1247	2022NBT-21874	105895	NBT	HiFi	sheep	feces
RGVC1248	2022NBT-21878	105882	NBT	HiFi	sheep	feces
RGVC1249	2022NBT-21883	105861	NBT	HiFi	sheep	feces
RGVC1250	2022NBT-219	910906	NBT	HiFi	sheep	feces
RGVC1251	2022NBT-21907	105764	NBT	HiFi	sheep	feces
RGVC1252	2022NBT-21909	105759	NBT	HiFi	sheep	feces
RGVC1253	2022NBT-21915	105729	NBT	HiFi	sheep	feces
RGVC1254	2022NBT-21922	105691	NBT	HiFi	sheep	feces
RGVC1255	2022NBT-21928_1	33790	NBT	HiFi	sheep	feces
RGVC1256	2022NBT-2194	521177	NBT	HiFi	sheep	feces
RGVC1257	2022NBT-21942	105584	NBT	HiFi	sheep	feces
RGVC1258	2022NBT-2195_1	68907	NBT	HiFi	sheep	feces
RGVC1259	2022NBT-21956_1	89139	NBT	HiFi	sheep	feces
RGVC1260	2022NBT-21978	105455	NBT	HiFi	sheep	feces
RGVC1261	2022NBT-21982_1	55854	NBT	HiFi	sheep	feces
RGVC1262	2022NBT-21990	105411	NBT	HiFi	sheep	feces
RGVC1263	2022NBT-21994	105402	NBT	HiFi	sheep	feces
RGVC1264	2022NBT-22	988070	NBT	HiFi	sheep	feces
RGVC1265	2022NBT-2202	520622	NBT	HiFi	sheep	feces
RGVC1266	2022NBT-22028_1	43155	NBT	HiFi	sheep	feces
RGVC1267	2022NBT-22031	105218	NBT	HiFi	sheep	feces
RGVC1268	2022NBT-22034	105209	NBT	HiFi	sheep	feces
RGVC1269	2022NBT-22055	105138	NBT	HiFi	sheep	feces
RGVC1270	2022NBT-22057_1	38263	NBT	HiFi	sheep	feces
RGVC1271	2022NBT-2207	520020	NBT	HiFi	sheep	feces
RGVC1272	2022NBT-22092	104996	NBT	HiFi	sheep	feces
RGVC1273	2022NBT-22097	104983	NBT	HiFi	sheep	feces
RGVC1274	2022NBT-22106	104938	NBT	HiFi	sheep	feces
RGVC1275	2022NBT-2211	519538	NBT	HiFi	sheep	feces
RGVC1276	2022NBT-22111	104919	NBT	HiFi	sheep	feces
RGVC1277	2022NBT-22118_1	84839	NBT	HiFi	sheep	feces
RGVC1278	2022NBT-2214	519285	NBT	HiFi	sheep	feces
RGVC1279	2022NBT-22141_1	66532	NBT	HiFi	sheep	feces
RGVC1280	2022NBT-2218	518665	NBT	HiFi	sheep	feces
RGVC1281	2022NBT-222	910004	NBT	HiFi	sheep	feces
RGVC1282	2022NBT-2220	518351	NBT	HiFi	sheep	feces
RGVC1283	2022NBT-22201	104487	NBT	HiFi	sheep	feces
RGVC1284	2022NBT-2224	518038	NBT	HiFi	sheep	feces
RGVC1285	2022NBT-22244_1	68672	NBT	HiFi	sheep	feces
RGVC1286	2022NBT-22248	104253	NBT	HiFi	sheep	feces
RGVC1287	2022NBT-2227	517689	NBT	HiFi	sheep	feces
RGVC1288	2022NBT-22280_1	97422	NBT	HiFi	sheep	feces
RGVC1289	2022NBT-22297	104035	NBT	HiFi	sheep	feces
RGVC1290	2022NBT-22300	104021	NBT	HiFi	sheep	feces
RGVC1291	2022NBT-22306	104004	NBT	HiFi	sheep	feces
RGVC1292	2022NBT-22311	103962	NBT	HiFi	sheep	feces
RGVC1293	2022NBT-22314	103954	NBT	HiFi	sheep	feces
RGVC1294	2022NBT-22319_1	54415	NBT	HiFi	sheep	feces
RGVC1295	2022NBT-22323	103915	NBT	HiFi	sheep	feces
RGVC1296	2022NBT-22341	103840	NBT	HiFi	sheep	feces
RGVC1297	2022NBT-2235	516950	NBT	HiFi	sheep	feces
RGVC1298	2022NBT-22360	103744	NBT	HiFi	sheep	feces
RGVC1299	2022NBT-22362	103741	NBT	HiFi	sheep	feces
RGVC1300	2022NBT-2238	516412	NBT	HiFi	sheep	feces
RGVC1301	2022NBT-2239	516303	NBT	HiFi	sheep	feces
RGVC1302	2022NBT-224_1	41844	NBT	HiFi	sheep	feces
RGVC1303	2022NBT-2242	515965	NBT	HiFi	sheep	feces
RGVC1304	2022NBT-22441	103426	NBT	HiFi	sheep	feces
RGVC1305	2022NBT-22467	103360	NBT	HiFi	sheep	feces
RGVC1306	2022NBT-2247	515653	NBT	HiFi	sheep	feces
RGVC1307	2022NBT-22473	103345	NBT	HiFi	sheep	feces
RGVC1308	2022NBT-2248	515648	NBT	HiFi	sheep	feces
RGVC1309	2022NBT-225	909660	NBT	HiFi	sheep	feces
RGVC1310	2022NBT-22581	102917	NBT	HiFi	sheep	feces
RGVC1311	2022NBT-2259	514424	NBT	HiFi	sheep	feces
RGVC1312	2022NBT-22593	102874	NBT	HiFi	sheep	feces
RGVC1313	2022NBT-226	909402	NBT	HiFi	sheep	feces
RGVC1314	2022NBT-2260_1	52770	NBT	HiFi	sheep	feces
RGVC1315	2022NBT-22604	102818	NBT	HiFi	sheep	feces
RGVC1316	2022NBT-2264	514057	NBT	HiFi	sheep	feces
RGVC1317	2022NBT-22640_1	33925	NBT	HiFi	sheep	feces
RGVC1318	2022NBT-22662	102548	NBT	HiFi	sheep	feces
RGVC1319	2022NBT-22677	102464	NBT	HiFi	sheep	feces
RGVC1320	2022NBT-22693_1	45186	NBT	HiFi	sheep	feces
RGVC1321	2022NBT-22709	102343	NBT	HiFi	sheep	feces
RGVC1322	2022NBT-22732	102256	NBT	HiFi	sheep	feces
RGVC1323	2022NBT-2274	512918	NBT	HiFi	sheep	feces
RGVC1324	2022NBT-22745_1	88929	NBT	HiFi	sheep	feces
RGVC1325	2022NBT-22771	102120	NBT	HiFi	sheep	feces
RGVC1326	2022NBT-22808	101943	NBT	HiFi	sheep	feces
RGVC1327	2022NBT-22838	101875	NBT	HiFi	sheep	feces
RGVC1328	2022NBT-22848	101841	NBT	HiFi	sheep	feces
RGVC1329	2022NBT-22857	101811	NBT	HiFi	sheep	feces
RGVC1330	2022NBT-22859	101806	NBT	HiFi	sheep	feces
RGVC1331	2022NBT-22879	101730	NBT	HiFi	sheep	feces
RGVC1332	2022NBT-22910	101587	NBT	HiFi	sheep	feces
RGVC1333	2022NBT-22941	101482	NBT	HiFi	sheep	feces
RGVC1334	2022NBT-22955	101422	NBT	HiFi	sheep	feces
RGVC1335	2022NBT-2299	510062	NBT	HiFi	sheep	feces
RGVC1336	2022NBT-23_1	42885	NBT	HiFi	sheep	feces
RGVC1337	2022NBT-2301	509942	NBT	HiFi	sheep	feces
RGVC1338	2022NBT-23015	101200	NBT	HiFi	sheep	feces
RGVC1339	2022NBT-23022	101181	NBT	HiFi	sheep	feces
RGVC1340	2022NBT-23026	101177	NBT	HiFi	sheep	feces
RGVC1341	2022NBT-2304	509802	NBT	HiFi	sheep	feces
RGVC1342	2022NBT-23043_1	48755	NBT	HiFi	sheep	feces
RGVC1343	2022NBT-2306	509633	NBT	HiFi	sheep	feces
RGVC1344	2022NBT-23065	101001	NBT	HiFi	sheep	feces
RGVC1345	2022NBT-23089	100938	NBT	HiFi	sheep	feces
RGVC1346	2022NBT-23092	100925	NBT	HiFi	sheep	feces
RGVC1347	2022NBT-231	908407	NBT	HiFi	sheep	feces
RGVC1348	2022NBT-23109	100846	NBT	HiFi	sheep	feces
RGVC1349	2022NBT-23111	100844	NBT	HiFi	sheep	feces
RGVC1350	2022NBT-2312	509268	NBT	HiFi	sheep	feces
RGVC1351	2022NBT-23130	100759	NBT	HiFi	sheep	feces
RGVC1352	2022NBT-23151_1	31813	NBT	HiFi	sheep	feces
RGVC1353	2022NBT-23169_1	43448	NBT	HiFi	sheep	feces
RGVC1354	2022NBT-23172	100646	NBT	HiFi	sheep	feces
RGVC1355	2022NBT-23184	100589	NBT	HiFi	sheep	feces
RGVC1356	2022NBT-23210	100513	NBT	HiFi	sheep	feces
RGVC1357	2022NBT-23216	100492	NBT	HiFi	sheep	feces
RGVC1358	2022NBT-23229	100438	NBT	HiFi	sheep	feces
RGVC1359	2022NBT-2326_2	41812	NBT	HiFi	sheep	feces
RGVC1360	2022NBT-23265_1	83264	NBT	HiFi	sheep	feces
RGVC1361	2022NBT-23268	100291	NBT	HiFi	sheep	feces
RGVC1362	2022NBT-23277	100275	NBT	HiFi	sheep	feces
RGVC1363	2022NBT-2328	508035	NBT	HiFi	sheep	feces
RGVC1364	2022NBT-23302_1	57240	NBT	HiFi	sheep	feces
RGVC1365	2022NBT-23312	100125	NBT	HiFi	sheep	feces
RGVC1366	2022NBT-23320	100089	NBT	HiFi	sheep	feces
RGVC1367	2022NBT-23323	100077	NBT	HiFi	sheep	feces
RGVC1368	2022NBT-23328_1	32961	NBT	HiFi	sheep	feces
RGVC1369	2022NBT-23350_1	62954	NBT	HiFi	sheep	feces
RGVC1370	2022NBT-23359	99975	NBT	HiFi	sheep	feces
RGVC1371	2022NBT-2337	507569	NBT	HiFi	sheep	feces
RGVC1372	2022NBT-23376	99931	NBT	HiFi	sheep	feces
RGVC1373	2022NBT-2339	507494	NBT	HiFi	sheep	feces
RGVC1374	2022NBT-23400	99843	NBT	HiFi	sheep	feces
RGVC1375	2022NBT-23408	99818	NBT	HiFi	sheep	feces
RGVC1376	2022NBT-23446	99667	NBT	HiFi	sheep	feces
RGVC1377	2022NBT-23452	99656	NBT	HiFi	sheep	feces
RGVC1378	2022NBT-2349	506695	NBT	HiFi	sheep	feces
RGVC1379	2022NBT-23497_1	39587	NBT	HiFi	sheep	feces
RGVC1380	2022NBT-2350	506692	NBT	HiFi	sheep	feces
RGVC1381	2022NBT-23506	99444	NBT	HiFi	sheep	feces
RGVC1382	2022NBT-23521	99382	NBT	HiFi	sheep	feces
RGVC1383	2022NBT-23522	99376	NBT	HiFi	sheep	feces
RGVC1384	2022NBT-23531_1	31920	NBT	HiFi	sheep	feces
RGVC1385	2022NBT-23532	99362	NBT	HiFi	sheep	feces
RGVC1386	2022NBT-23567_1	29395	NBT	HiFi	sheep	feces
RGVC1387	2022NBT-23595	99141	NBT	HiFi	sheep	feces
RGVC1388	2022NBT-2360	505337	NBT	HiFi	sheep	feces
RGVC1389	2022NBT-23621_1	29322	NBT	HiFi	sheep	feces
RGVC1390	2022NBT-23631	99041	NBT	HiFi	sheep	feces
RGVC1391	2022NBT-23676	98842	NBT	HiFi	sheep	feces
RGVC1392	2022NBT-2369	504597	NBT	HiFi	sheep	feces
RGVC1393	2022NBT-23693_1	49824	NBT	HiFi	sheep	feces
RGVC1394	2022NBT-237_1	44738	NBT	HiFi	sheep	feces
RGVC1395	2022NBT-2375	504186	NBT	HiFi	sheep	feces
RGVC1396	2022NBT-23753	98509	NBT	HiFi	sheep	feces
RGVC1397	2022NBT-23767	98468	NBT	HiFi	sheep	feces
RGVC1398	2022NBT-23769	98461	NBT	HiFi	sheep	feces
RGVC1399	2022NBT-23783	98408	NBT	HiFi	sheep	feces
RGVC1400	2022NBT-238_1	36946	NBT	HiFi	sheep	feces
RGVC1401	2022NBT-2382	503536	NBT	HiFi	sheep	feces
RGVC1402	2022NBT-23849	98235	NBT	HiFi	sheep	feces
RGVC1403	2022NBT-23866	98177	NBT	HiFi	sheep	feces
RGVC1404	2022NBT-23875	98141	NBT	HiFi	sheep	feces
RGVC1405	2022NBT-2388	503227	NBT	HiFi	sheep	feces
RGVC1406	2022NBT-23913	97985	NBT	HiFi	sheep	feces
RGVC1407	2022NBT-23919_1	38961	NBT	HiFi	sheep	feces
RGVC1408	2022NBT-23920	97969	NBT	HiFi	sheep	feces
RGVC1409	2022NBT-23925	97960	NBT	HiFi	sheep	feces
RGVC1410	2022NBT-2394	502738	NBT	HiFi	sheep	feces
RGVC1411	2022NBT-2395	502736	NBT	HiFi	sheep	feces
RGVC1412	2022NBT-2396	502695	NBT	HiFi	sheep	feces
RGVC1413	2022NBT-23962_1	36317	NBT	HiFi	sheep	feces
RGVC1414	2022NBT-23998	97702	NBT	HiFi	sheep	feces
RGVC1415	2022NBT-24	987023	NBT	HiFi	sheep	feces
RGVC1416	2022NBT-24002	97688	NBT	HiFi	sheep	feces
RGVC1417	2022NBT-2401	502415	NBT	HiFi	sheep	feces
RGVC1418	2022NBT-24010_1	33730	NBT	HiFi	sheep	feces
RGVC1419	2022NBT-24049	97513	NBT	HiFi	sheep	feces
RGVC1420	2022NBT-2405	502216	NBT	HiFi	sheep	feces
RGVC1421	2022NBT-24067	97437	NBT	HiFi	sheep	feces
RGVC1422	2022NBT-24073	97428	NBT	HiFi	sheep	feces
RGVC1423	2022NBT-24079	97415	NBT	HiFi	sheep	feces
RGVC1424	2022NBT-24082	97409	NBT	HiFi	sheep	feces
RGVC1425	2022NBT-2409_1	121095	NBT	HiFi	sheep	feces
RGVC1426	2022NBT-24100	97363	NBT	HiFi	sheep	feces
RGVC1427	2022NBT-2413	501368	NBT	HiFi	sheep	feces
RGVC1428	2022NBT-24147_1	95877	NBT	HiFi	sheep	feces
RGVC1429	2022NBT-24166_1	56378	NBT	HiFi	sheep	feces
RGVC1430	2022NBT-24182	97042	NBT	HiFi	sheep	feces
RGVC1431	2022NBT-24187_1	50340	NBT	HiFi	sheep	feces
RGVC1432	2022NBT-24198_1	48228	NBT	HiFi	sheep	feces
RGVC1433	2022NBT-24201_1	63596	NBT	HiFi	sheep	feces
RGVC1434	2022NBT-24226	96910	NBT	HiFi	sheep	feces
RGVC1435	2022NBT-24228	96906	NBT	HiFi	sheep	feces
RGVC1436	2022NBT-24243	96826	NBT	HiFi	sheep	feces
RGVC1437	2022NBT-24250	96804	NBT	HiFi	sheep	feces
RGVC1438	2022NBT-24290	96654	NBT	HiFi	sheep	feces
RGVC1439	2022NBT-2430	499536	NBT	HiFi	sheep	feces
RGVC1440	2022NBT-24322_1	46363	NBT	HiFi	sheep	feces
RGVC1441	2022NBT-24347	96486	NBT	HiFi	sheep	feces
RGVC1442	2022NBT-24358	96457	NBT	HiFi	sheep	feces
RGVC1443	2022NBT-24390	96373	NBT	HiFi	sheep	feces
RGVC1444	2022NBT-24402	96320	NBT	HiFi	sheep	feces
RGVC1445	2022NBT-24416	96269	NBT	HiFi	sheep	feces
RGVC1446	2022NBT-24426	96241	NBT	HiFi	sheep	feces
RGVC1447	2022NBT-24444_1	43727	NBT	HiFi	sheep	feces
RGVC1448	2022NBT-24445_1	38898	NBT	HiFi	sheep	feces
RGVC1449	2022NBT-24452_1	71740	NBT	HiFi	sheep	feces
RGVC1450	2022NBT-24503	95971	NBT	HiFi	sheep	feces
RGVC1451	2022NBT-2451	498081	NBT	HiFi	sheep	feces
RGVC1452	2022NBT-24529	95862	NBT	HiFi	sheep	feces
RGVC1453	2022NBT-2456	497535	NBT	HiFi	sheep	feces
RGVC1454	2022NBT-24562	95753	NBT	HiFi	sheep	feces
RGVC1455	2022NBT-24579	95720	NBT	HiFi	sheep	feces
RGVC1456	2022NBT-24586_1	29071	NBT	HiFi	sheep	feces
RGVC1457	2022NBT-24593_1	35342	NBT	HiFi	sheep	feces
RGVC1458	2022NBT-246	901900	NBT	HiFi	sheep	feces
RGVC1459	2022NBT-24623	95586	NBT	HiFi	sheep	feces
RGVC1460	2022NBT-24642	95507	NBT	HiFi	sheep	feces
RGVC1461	2022NBT-24660_1	53995	NBT	HiFi	sheep	feces
RGVC1462	2022NBT-24661	95419	NBT	HiFi	sheep	feces
RGVC1463	2022NBT-2467_1	492074	NBT	HiFi	sheep	feces
RGVC1464	2022NBT-24682	95349	NBT	HiFi	sheep	feces
RGVC1465	2022NBT-247_1	40679	NBT	HiFi	sheep	feces
RGVC1466	2022NBT-24740	95162	NBT	HiFi	sheep	feces
RGVC1467	2022NBT-24761	95101	NBT	HiFi	sheep	feces
RGVC1468	2022NBT-24785	95004	NBT	HiFi	sheep	feces
RGVC1469	2022NBT-24788	94995	NBT	HiFi	sheep	feces
RGVC1470	2022NBT-248	901737	NBT	HiFi	sheep	feces
RGVC1471	2022NBT-24803	94939	NBT	HiFi	sheep	feces
RGVC1472	2022NBT-24804	94937	NBT	HiFi	sheep	feces
RGVC1473	2022NBT-2481	495841	NBT	HiFi	sheep	feces
RGVC1474	2022NBT-24836	94835	NBT	HiFi	sheep	feces
RGVC1475	2022NBT-2484	495614	NBT	HiFi	sheep	feces
RGVC1476	2022NBT-24849_1	54764	NBT	HiFi	sheep	feces
RGVC1477	2022NBT-24858_1	48737	NBT	HiFi	sheep	feces
RGVC1478	2022NBT-24865_1	55902	NBT	HiFi	sheep	feces
RGVC1479	2022NBT-249	901667	NBT	HiFi	sheep	feces
RGVC1480	2022NBT-2492	494727	NBT	HiFi	sheep	feces
RGVC1481	2022NBT-2494	494677	NBT	HiFi	sheep	feces
RGVC1482	2022NBT-24955	94399	NBT	HiFi	sheep	feces
RGVC1483	2022NBT-24985	94284	NBT	HiFi	sheep	feces
RGVC1484	2022NBT-24986_1	35105	NBT	HiFi	sheep	feces
RGVC1485	2022NBT-2499	494308	NBT	HiFi	sheep	feces
RGVC1486	2022NBT-25_1	43041	NBT	HiFi	sheep	feces
RGVC1487	2022NBT-2500	494303	NBT	HiFi	sheep	feces
RGVC1488	2022NBT-25017_1	64528	NBT	HiFi	sheep	feces
RGVC1489	2022NBT-25038	94089	NBT	HiFi	sheep	feces
RGVC1490	2022NBT-2505_1	87112	NBT	HiFi	sheep	feces
RGVC1491	2022NBT-25059	93999	NBT	HiFi	sheep	feces
RGVC1492	2022NBT-25087_1	30822	NBT	HiFi	sheep	feces
RGVC1493	2022NBT-2516	492640	NBT	HiFi	sheep	feces
RGVC1494	2022NBT-25172	93630	NBT	HiFi	sheep	feces
RGVC1495	2022NBT-25185	93603	NBT	HiFi	sheep	feces
RGVC1496	2022NBT-25228	93409	NBT	HiFi	sheep	feces
RGVC1497	2022NBT-25232	93402	NBT	HiFi	sheep	feces
RGVC1498	2022NBT-25240_1	63951	NBT	HiFi	sheep	feces
RGVC1499	2022NBT-25241	93372	NBT	HiFi	sheep	feces
RGVC1500	2022NBT-25248	93342	NBT	HiFi	sheep	feces
RGVC1501	2022NBT-25253	93316	NBT	HiFi	sheep	feces
RGVC1502	2022NBT-25257	93303	NBT	HiFi	sheep	feces
RGVC1503	2022NBT-25259	93291	NBT	HiFi	sheep	feces
RGVC1504	2022NBT-25266	93261	NBT	HiFi	sheep	feces
RGVC1505	2022NBT-25267	93258	NBT	HiFi	sheep	feces
RGVC1506	2022NBT-25276	93205	NBT	HiFi	sheep	feces
RGVC1507	2022NBT-253	900002	NBT	HiFi	sheep	feces
RGVC1508	2022NBT-2531	491496	NBT	HiFi	sheep	feces
RGVC1509	2022NBT-25336_1	78512	NBT	HiFi	sheep	feces
RGVC1510	2022NBT-2535	491117	NBT	HiFi	sheep	feces
RGVC1511	2022NBT-25352_1	29488	NBT	HiFi	sheep	feces
RGVC1512	2022NBT-25367	92895	NBT	HiFi	sheep	feces
RGVC1513	2022NBT-2537	490677	NBT	HiFi	sheep	feces
RGVC1514	2022NBT-25383	92846	NBT	HiFi	sheep	feces
RGVC1515	2022NBT-25384_2	41752	NBT	HiFi	sheep	feces
RGVC1516	2022NBT-2539	490537	NBT	HiFi	sheep	feces
RGVC1517	2022NBT-254	899500	NBT	HiFi	sheep	feces
RGVC1518	2022NBT-2540	490327	NBT	HiFi	sheep	feces
RGVC1519	2022NBT-25414	92742	NBT	HiFi	sheep	feces
RGVC1520	2022NBT-25466	92582	NBT	HiFi	sheep	feces
RGVC1521	2022NBT-2547_1	40909	NBT	HiFi	sheep	feces
RGVC1522	2022NBT-2548	489554	NBT	HiFi	sheep	feces
RGVC1523	2022NBT-255	899461	NBT	HiFi	sheep	feces
RGVC1524	2022NBT-25502	92469	NBT	HiFi	sheep	feces
RGVC1525	2022NBT-25525_1	44950	NBT	HiFi	sheep	feces
RGVC1526	2022NBT-25530	92349	NBT	HiFi	sheep	feces
RGVC1527	2022NBT-25558	92279	NBT	HiFi	sheep	feces
RGVC1528	2022NBT-25568	92262	NBT	HiFi	sheep	feces
RGVC1529	2022NBT-2559	488654	NBT	HiFi	sheep	feces
RGVC1530	2022NBT-256	899404	NBT	HiFi	sheep	feces
RGVC1531	2022NBT-25608	92148	NBT	HiFi	sheep	feces
RGVC1532	2022NBT-25634	92065	NBT	HiFi	sheep	feces
RGVC1533	2022NBT-2566	488161	NBT	HiFi	sheep	feces
RGVC1534	2022NBT-25669_1	43472	NBT	HiFi	sheep	feces
RGVC1535	2022NBT-2567	488154	NBT	HiFi	sheep	feces
RGVC1536	2022NBT-25682	91920	NBT	HiFi	sheep	feces
RGVC1537	2022NBT-257	899325	NBT	HiFi	sheep	feces
RGVC1538	2022NBT-2572	487829	NBT	HiFi	sheep	feces
RGVC1539	2022NBT-25735	91730	NBT	HiFi	sheep	feces
RGVC1540	2022NBT-25775	91556	NBT	HiFi	sheep	feces
RGVC1541	2022NBT-25819	91402	NBT	HiFi	sheep	feces
RGVC1542	2022NBT-2582	486724	NBT	HiFi	sheep	feces
RGVC1543	2022NBT-25820	91401	NBT	HiFi	sheep	feces
RGVC1544	2022NBT-25831	91355	NBT	HiFi	sheep	feces
RGVC1545	2022NBT-25883_1	60810	NBT	HiFi	sheep	feces
RGVC1546	2022NBT-25885	91166	NBT	HiFi	sheep	feces
RGVC1547	2022NBT-25901	91130	NBT	HiFi	sheep	feces
RGVC1548	2022NBT-25915	91093	NBT	HiFi	sheep	feces
RGVC1549	2022NBT-25917	91087	NBT	HiFi	sheep	feces
RGVC1550	2022NBT-25951	90957	NBT	HiFi	sheep	feces
RGVC1551	2022NBT-25966_1	63438	NBT	HiFi	sheep	feces
RGVC1552	2022NBT-25968	90873	NBT	HiFi	sheep	feces
RGVC1553	2022NBT-25976	90857	NBT	HiFi	sheep	feces
RGVC1554	2022NBT-26	985888	NBT	HiFi	sheep	feces
RGVC1555	2022NBT-260	898208	NBT	HiFi	sheep	feces
RGVC1556	2022NBT-2600_1	37917	NBT	HiFi	sheep	feces
RGVC1557	2022NBT-2604	484063	NBT	HiFi	sheep	feces
RGVC1558	2022NBT-26046	90630	NBT	HiFi	sheep	feces
RGVC1559	2022NBT-2606	484019	NBT	HiFi	sheep	feces
RGVC1560	2022NBT-2608	483862	NBT	HiFi	sheep	feces
RGVC1561	2022NBT-26083_1	74229	NBT	HiFi	sheep	feces
RGVC1562	2022NBT-26097_1	49697	NBT	HiFi	sheep	feces
RGVC1563	2022NBT-26099	90456	NBT	HiFi	sheep	feces
RGVC1564	2022NBT-261	898204	NBT	HiFi	sheep	feces
RGVC1565	2022NBT-2610	483764	NBT	HiFi	sheep	feces
RGVC1566	2022NBT-2611	483760	NBT	HiFi	sheep	feces
RGVC1567	2022NBT-26121_1	72070	NBT	HiFi	sheep	feces
RGVC1568	2022NBT-26123	90383	NBT	HiFi	sheep	feces
RGVC1569	2022NBT-2614_1	123107	NBT	HiFi	sheep	feces
RGVC1570	2022NBT-26146	90345	NBT	HiFi	sheep	feces
RGVC1571	2022NBT-262_1	45216	NBT	HiFi	sheep	feces
RGVC1572	2022NBT-2624	482217	NBT	HiFi	sheep	feces
RGVC1573	2022NBT-26242	90055	NBT	HiFi	sheep	feces
RGVC1574	2022NBT-2627_1	45937	NBT	HiFi	sheep	feces
RGVC1575	2022NBT-2629	482023	NBT	HiFi	sheep	feces
RGVC1576	2022NBT-263	897725	NBT	HiFi	sheep	feces
RGVC1577	2022NBT-26301	89915	NBT	HiFi	sheep	feces
RGVC1578	2022NBT-2632	481610	NBT	HiFi	sheep	feces
RGVC1579	2022NBT-26327	89841	NBT	HiFi	sheep	feces
RGVC1580	2022NBT-2633	481584	NBT	HiFi	sheep	feces
RGVC1581	2022NBT-26343	89781	NBT	HiFi	sheep	feces
RGVC1582	2022NBT-26346	89778	NBT	HiFi	sheep	feces
RGVC1583	2022NBT-26384	89671	NBT	HiFi	sheep	feces
RGVC1584	2022NBT-26397	89627	NBT	HiFi	sheep	feces
RGVC1585	2022NBT-264_1	33526	NBT	HiFi	sheep	feces
RGVC1586	2022NBT-26402	89615	NBT	HiFi	sheep	feces
RGVC1587	2022NBT-26414	89565	NBT	HiFi	sheep	feces
RGVC1588	2022NBT-26423	89544	NBT	HiFi	sheep	feces
RGVC1589	2022NBT-2646	480234	NBT	HiFi	sheep	feces
RGVC1590	2022NBT-26472	89391	NBT	HiFi	sheep	feces
RGVC1591	2022NBT-26482_1	80871	NBT	HiFi	sheep	feces
RGVC1592	2022NBT-265	896863	NBT	HiFi	sheep	feces
RGVC1593	2022NBT-26509	89278	NBT	HiFi	sheep	feces
RGVC1594	2022NBT-26511	89274	NBT	HiFi	sheep	feces
RGVC1595	2022NBT-26519	89252	NBT	HiFi	sheep	feces
RGVC1596	2022NBT-2652	479816	NBT	HiFi	sheep	feces
RGVC1597	2022NBT-2653	479763	NBT	HiFi	sheep	feces
RGVC1598	2022NBT-2655_1	36936	NBT	HiFi	sheep	feces
RGVC1599	2022NBT-2658	478630	NBT	HiFi	sheep	feces
RGVC1600	2022NBT-2660	478443	NBT	HiFi	sheep	feces
RGVC1601	2022NBT-26607	88933	NBT	HiFi	sheep	feces
RGVC1602	2022NBT-26613	88911	NBT	HiFi	sheep	feces
RGVC1603	2022NBT-2663_1	35351	NBT	HiFi	sheep	feces
RGVC1604	2022NBT-2664	478195	NBT	HiFi	sheep	feces
RGVC1605	2022NBT-26660	88726	NBT	HiFi	sheep	feces
RGVC1606	2022NBT-2676	477313	NBT	HiFi	sheep	feces
RGVC1607	2022NBT-26775	88395	NBT	HiFi	sheep	feces
RGVC1608	2022NBT-26778	88389	NBT	HiFi	sheep	feces
RGVC1609	2022NBT-26782	88377	NBT	HiFi	sheep	feces
RGVC1610	2022NBT-26786	88367	NBT	HiFi	sheep	feces
RGVC1611	2022NBT-2680	476694	NBT	HiFi	sheep	feces
RGVC1612	2022NBT-26807	88333	NBT	HiFi	sheep	feces
RGVC1613	2022NBT-26846	88201	NBT	HiFi	sheep	feces
RGVC1614	2022NBT-26866	88147	NBT	HiFi	sheep	feces
RGVC1615	2022NBT-26867_1	59887	NBT	HiFi	sheep	feces
RGVC1616	2022NBT-26869_1	49915	NBT	HiFi	sheep	feces
RGVC1617	2022NBT-26898	88038	NBT	HiFi	sheep	feces
RGVC1618	2022NBT-269	896245	NBT	HiFi	sheep	feces
RGVC1619	2022NBT-26919	87980	NBT	HiFi	sheep	feces
RGVC1620	2022NBT-2694	475681	NBT	HiFi	sheep	feces
RGVC1621	2022NBT-2695	475650	NBT	HiFi	sheep	feces
RGVC1622	2022NBT-26958	87877	NBT	HiFi	sheep	feces
RGVC1623	2022NBT-26995	87780	NBT	HiFi	sheep	feces
RGVC1624	2022NBT-27	985415	NBT	HiFi	sheep	feces
RGVC1625	2022NBT-27008	87729	NBT	HiFi	sheep	feces
RGVC1626	2022NBT-27023	87674	NBT	HiFi	sheep	feces
RGVC1627	2022NBT-27029	87656	NBT	HiFi	sheep	feces
RGVC1628	2022NBT-27043_1	58218	NBT	HiFi	sheep	feces
RGVC1629	2022NBT-27055	87572	NBT	HiFi	sheep	feces
RGVC1630	2022NBT-27060	87550	NBT	HiFi	sheep	feces
RGVC1631	2022NBT-27068_1	63702	NBT	HiFi	sheep	feces
RGVC1632	2022NBT-2708	474358	NBT	HiFi	sheep	feces
RGVC1633	2022NBT-271	895063	NBT	HiFi	sheep	feces
RGVC1634	2022NBT-2710	474256	NBT	HiFi	sheep	feces
RGVC1635	2022NBT-27104	87452	NBT	HiFi	sheep	feces
RGVC1636	2022NBT-272	894913	NBT	HiFi	sheep	feces
RGVC1637	2022NBT-27211	87144	NBT	HiFi	sheep	feces
RGVC1638	2022NBT-27218	87122	NBT	HiFi	sheep	feces
RGVC1639	2022NBT-27226	87097	NBT	HiFi	sheep	feces
RGVC1640	2022NBT-27259_1	71176	NBT	HiFi	sheep	feces
RGVC1641	2022NBT-27276	86923	NBT	HiFi	sheep	feces
RGVC1642	2022NBT-2728	472468	NBT	HiFi	sheep	feces
RGVC1643	2022NBT-27291	86874	NBT	HiFi	sheep	feces
RGVC1644	2022NBT-2733	472038	NBT	HiFi	sheep	feces
RGVC1645	2022NBT-27341	86707	NBT	HiFi	sheep	feces
RGVC1646	2022NBT-27434_1	36019	NBT	HiFi	sheep	feces
RGVC1647	2022NBT-27435	86445	NBT	HiFi	sheep	feces
RGVC1648	2022NBT-2744	471289	NBT	HiFi	sheep	feces
RGVC1649	2022NBT-27445	86420	NBT	HiFi	sheep	feces
RGVC1650	2022NBT-27485_1	72759	NBT	HiFi	sheep	feces
RGVC1651	2022NBT-2749	471109	NBT	HiFi	sheep	feces
RGVC1652	2022NBT-27508_1	39064	NBT	HiFi	sheep	feces
RGVC1653	2022NBT-27510	86279	NBT	HiFi	sheep	feces
RGVC1654	2022NBT-27539	86196	NBT	HiFi	sheep	feces
RGVC1655	2022NBT-27550	86158	NBT	HiFi	sheep	feces
RGVC1656	2022NBT-2756	470800	NBT	HiFi	sheep	feces
RGVC1657	2022NBT-276	894323	NBT	HiFi	sheep	feces
RGVC1658	2022NBT-2760	470397	NBT	HiFi	sheep	feces
RGVC1659	2022NBT-27615	85991	NBT	HiFi	sheep	feces
RGVC1660	2022NBT-2762	470043	NBT	HiFi	sheep	feces
RGVC1661	2022NBT-2763	469785	NBT	HiFi	sheep	feces
RGVC1662	2022NBT-2764	469750	NBT	HiFi	sheep	feces
RGVC1663	2022NBT-27648	85916	NBT	HiFi	sheep	feces
RGVC1664	2022NBT-27656	85900	NBT	HiFi	sheep	feces
RGVC1665	2022NBT-27677	85846	NBT	HiFi	sheep	feces
RGVC1666	2022NBT-2768_1	103270	NBT	HiFi	sheep	feces
RGVC1667	2022NBT-27734	85653	NBT	HiFi	sheep	feces
RGVC1668	2022NBT-27736_1	39469	NBT	HiFi	sheep	feces
RGVC1669	2022NBT-27738_1	74679	NBT	HiFi	sheep	feces
RGVC1670	2022NBT-27741	85633	NBT	HiFi	sheep	feces
RGVC1671	2022NBT-27748_1	26037	NBT	HiFi	sheep	feces
RGVC1672	2022NBT-27803	85441	NBT	HiFi	sheep	feces
RGVC1673	2022NBT-2783	467477	NBT	HiFi	sheep	feces
RGVC1674	2022NBT-27838	85347	NBT	HiFi	sheep	feces
RGVC1675	2022NBT-2788	467142	NBT	HiFi	sheep	feces
RGVC1676	2022NBT-279	893449	NBT	HiFi	sheep	feces
RGVC1677	2022NBT-2792_1	44207	NBT	HiFi	sheep	feces
RGVC1678	2022NBT-27926	85095	NBT	HiFi	sheep	feces
RGVC1679	2022NBT-27930	85085	NBT	HiFi	sheep	feces
RGVC1680	2022NBT-27932	85083	NBT	HiFi	sheep	feces
RGVC1681	2022NBT-27964	85007	NBT	HiFi	sheep	feces
RGVC1682	2022NBT-27982_1	78613	NBT	HiFi	sheep	feces
RGVC1683	2022NBT-27992	84917	NBT	HiFi	sheep	feces
RGVC1684	2022NBT-28_1	40628	NBT	HiFi	sheep	feces
RGVC1685	2022NBT-280	892963	NBT	HiFi	sheep	feces
RGVC1686	2022NBT-28002	84894	NBT	HiFi	sheep	feces
RGVC1687	2022NBT-28006	84893	NBT	HiFi	sheep	feces
RGVC1688	2022NBT-28029	84841	NBT	HiFi	sheep	feces
RGVC1689	2022NBT-2803	465703	NBT	HiFi	sheep	feces
RGVC1690	2022NBT-2809	465254	NBT	HiFi	sheep	feces
RGVC1691	2022NBT-28091	84653	NBT	HiFi	sheep	feces
RGVC1692	2022NBT-281	892854	NBT	HiFi	sheep	feces
RGVC1693	2022NBT-28100_1	70569	NBT	HiFi	sheep	feces
RGVC1694	2022NBT-2813_1	41346	NBT	HiFi	sheep	feces
RGVC1695	2022NBT-2815	464608	NBT	HiFi	sheep	feces
RGVC1696	2022NBT-28154	84463	NBT	HiFi	sheep	feces
RGVC1697	2022NBT-28160	84434	NBT	HiFi	sheep	feces
RGVC1698	2022NBT-28165	84414	NBT	HiFi	sheep	feces
RGVC1699	2022NBT-28207	84320	NBT	HiFi	sheep	feces
RGVC1700	2022NBT-28219	84289	NBT	HiFi	sheep	feces
RGVC1701	2022NBT-28228_2	29124	NBT	HiFi	sheep	feces
RGVC1702	2022NBT-28272	84133	NBT	HiFi	sheep	feces
RGVC1703	2022NBT-28274	84126	NBT	HiFi	sheep	feces
RGVC1704	2022NBT-2829	463446	NBT	HiFi	sheep	feces
RGVC1705	2022NBT-28293	84077	NBT	HiFi	sheep	feces
RGVC1706	2022NBT-283	892414	NBT	HiFi	sheep	feces
RGVC1707	2022NBT-28325_1	65065	NBT	HiFi	sheep	feces
RGVC1708	2022NBT-28327	83978	NBT	HiFi	sheep	feces
RGVC1709	2022NBT-28374_1	43333	NBT	HiFi	sheep	feces
RGVC1710	2022NBT-2841	462463	NBT	HiFi	sheep	feces
RGVC1711	2022NBT-28415	83741	NBT	HiFi	sheep	feces
RGVC1712	2022NBT-28493_1	46817	NBT	HiFi	sheep	feces
RGVC1713	2022NBT-28505	83517	NBT	HiFi	sheep	feces
RGVC1714	2022NBT-28506	83514	NBT	HiFi	sheep	feces
RGVC1715	2022NBT-2851	461929	NBT	HiFi	sheep	feces
RGVC1716	2022NBT-2853	461689	NBT	HiFi	sheep	feces
RGVC1717	2022NBT-28537	83437	NBT	HiFi	sheep	feces
RGVC1718	2022NBT-28540	83434	NBT	HiFi	sheep	feces
RGVC1719	2022NBT-28546	83420	NBT	HiFi	sheep	feces
RGVC1720	2022NBT-2855_1	38064	NBT	HiFi	sheep	feces
RGVC1721	2022NBT-28564	83353	NBT	HiFi	sheep	feces
RGVC1722	2022NBT-2858_1	64597	NBT	HiFi	sheep	feces
RGVC1723	2022NBT-286	891603	NBT	HiFi	sheep	feces
RGVC1724	2022NBT-2862_1	36456	NBT	HiFi	sheep	feces
RGVC1725	2022NBT-28621_1	55054	NBT	HiFi	sheep	feces
RGVC1726	2022NBT-28623	83212	NBT	HiFi	sheep	feces
RGVC1727	2022NBT-28659	83134	NBT	HiFi	sheep	feces
RGVC1728	2022NBT-28667	83110	NBT	HiFi	sheep	feces
RGVC1729	2022NBT-28678	83092	NBT	HiFi	sheep	feces
RGVC1730	2022NBT-2868	460551	NBT	HiFi	sheep	feces
RGVC1731	2022NBT-28682	83077	NBT	HiFi	sheep	feces
RGVC1732	2022NBT-28694	83051	NBT	HiFi	sheep	feces
RGVC1733	2022NBT-2873	459797	NBT	HiFi	sheep	feces
RGVC1734	2022NBT-28732	82947	NBT	HiFi	sheep	feces
RGVC1735	2022NBT-28738	82935	NBT	HiFi	sheep	feces
RGVC1736	2022NBT-2878_1	44976	NBT	HiFi	sheep	feces
RGVC1737	2022NBT-28787	82805	NBT	HiFi	sheep	feces
RGVC1738	2022NBT-288	891143	NBT	HiFi	sheep	feces
RGVC1739	2022NBT-28813	82727	NBT	HiFi	sheep	feces
RGVC1740	2022NBT-28815	82725	NBT	HiFi	sheep	feces
RGVC1741	2022NBT-2883	459046	NBT	HiFi	sheep	feces
RGVC1742	2022NBT-2886_1	44069	NBT	HiFi	sheep	feces
RGVC1743	2022NBT-28868_1	25321	NBT	HiFi	sheep	feces
RGVC1744	2022NBT-28872	82591	NBT	HiFi	sheep	feces
RGVC1745	2022NBT-28873	82588	NBT	HiFi	sheep	feces
RGVC1746	2022NBT-2889	457938	NBT	HiFi	sheep	feces
RGVC1747	2022NBT-289	890800	NBT	HiFi	sheep	feces
RGVC1748	2022NBT-2893	457613	NBT	HiFi	sheep	feces
RGVC1749	2022NBT-2896	457284	NBT	HiFi	sheep	feces
RGVC1750	2022NBT-2897	457191	NBT	HiFi	sheep	feces
RGVC1751	2022NBT-29_1	69354	NBT	HiFi	sheep	feces
RGVC1752	2022NBT-29013	82204	NBT	HiFi	sheep	feces
RGVC1753	2022NBT-29085	82029	NBT	HiFi	sheep	feces
RGVC1754	2022NBT-2910_1	33818	NBT	HiFi	sheep	feces
RGVC1755	2022NBT-29106	81983	NBT	HiFi	sheep	feces
RGVC1756	2022NBT-2912	455861	NBT	HiFi	sheep	feces
RGVC1757	2022NBT-29176	81822	NBT	HiFi	sheep	feces
RGVC1758	2022NBT-2918_1	41586	NBT	HiFi	sheep	feces
RGVC1759	2022NBT-29180	81820	NBT	HiFi	sheep	feces
RGVC1760	2022NBT-29188_1	18072	NBT	HiFi	sheep	feces
RGVC1761	2022NBT-29196	81790	NBT	HiFi	sheep	feces
RGVC1762	2022NBT-29197	81790	NBT	HiFi	sheep	feces
RGVC1763	2022NBT-292	890531	NBT	HiFi	sheep	feces
RGVC1764	2022NBT-29205	81753	NBT	HiFi	sheep	feces
RGVC1765	2022NBT-29207	81751	NBT	HiFi	sheep	feces
RGVC1766	2022NBT-29217	81728	NBT	HiFi	sheep	feces
RGVC1767	2022NBT-29220	81724	NBT	HiFi	sheep	feces
RGVC1768	2022NBT-29261	81621	NBT	HiFi	sheep	feces
RGVC1769	2022NBT-29269_1	34055	NBT	HiFi	sheep	feces
RGVC1770	2022NBT-29271_1	44431	NBT	HiFi	sheep	feces
RGVC1771	2022NBT-2928_1	191916	NBT	HiFi	sheep	feces
RGVC1772	2022NBT-29288_1	30329	NBT	HiFi	sheep	feces
RGVC1773	2022NBT-293_1	51798	NBT	HiFi	sheep	feces
RGVC1774	2022NBT-2936	454699	NBT	HiFi	sheep	feces
RGVC1775	2022NBT-294	889570	NBT	HiFi	sheep	feces
RGVC1776	2022NBT-2941	454453	NBT	HiFi	sheep	feces
RGVC1777	2022NBT-2942	454333	NBT	HiFi	sheep	feces
RGVC1778	2022NBT-29428	81233	NBT	HiFi	sheep	feces
RGVC1779	2022NBT-29467	81102	NBT	HiFi	sheep	feces
RGVC1780	2022NBT-295	889334	NBT	HiFi	sheep	feces
RGVC1781	2022NBT-29528	80933	NBT	HiFi	sheep	feces
RGVC1782	2022NBT-29536	80917	NBT	HiFi	sheep	feces
RGVC1783	2022NBT-29561	80841	NBT	HiFi	sheep	feces
RGVC1784	2022NBT-29566	80830	NBT	HiFi	sheep	feces
RGVC1785	2022NBT-29568	80829	NBT	HiFi	sheep	feces
RGVC1786	2022NBT-29588_1	33170	NBT	HiFi	sheep	feces
RGVC1787	2022NBT-296	889204	NBT	HiFi	sheep	feces
RGVC1788	2022NBT-29610	80695	NBT	HiFi	sheep	feces
RGVC1789	2022NBT-29611	80693	NBT	HiFi	sheep	feces
RGVC1790	2022NBT-29613	80688	NBT	HiFi	sheep	feces
RGVC1791	2022NBT-29614	80686	NBT	HiFi	sheep	feces
RGVC1792	2022NBT-2965_1	41776	NBT	HiFi	sheep	feces
RGVC1793	2022NBT-29659	80584	NBT	HiFi	sheep	feces
RGVC1794	2022NBT-2966_1	56706	NBT	HiFi	sheep	feces
RGVC1795	2022NBT-2968	451898	NBT	HiFi	sheep	feces
RGVC1796	2022NBT-29683	80529	NBT	HiFi	sheep	feces
RGVC1797	2022NBT-29688	80521	NBT	HiFi	sheep	feces
RGVC1798	2022NBT-29719	80442	NBT	HiFi	sheep	feces
RGVC1799	2022NBT-2972	451564	NBT	HiFi	sheep	feces
RGVC1800	2022NBT-2973_1	34946	NBT	HiFi	sheep	feces
RGVC1801	2022NBT-2973_2	34708	NBT	HiFi	sheep	feces
RGVC1802	2022NBT-29760	80335	NBT	HiFi	sheep	feces
RGVC1803	2022NBT-29774	80312	NBT	HiFi	sheep	feces
RGVC1804	2022NBT-29784_1	45119	NBT	HiFi	sheep	feces
RGVC1805	2022NBT-29797	80260	NBT	HiFi	sheep	feces
RGVC1806	2022NBT-29801	80253	NBT	HiFi	sheep	feces
RGVC1807	2022NBT-2984	450722	NBT	HiFi	sheep	feces
RGVC1808	2022NBT-29852	80114	NBT	HiFi	sheep	feces
RGVC1809	2022NBT-29864_1	69035	NBT	HiFi	sheep	feces
RGVC1810	2022NBT-2987	450261	NBT	HiFi	sheep	feces
RGVC1811	2022NBT-29878	80054	NBT	HiFi	sheep	feces
RGVC1812	2022NBT-299	887382	NBT	HiFi	sheep	feces
RGVC1813	2022NBT-2992	450070	NBT	HiFi	sheep	feces
RGVC1814	2022NBT-29938	79897	NBT	HiFi	sheep	feces
RGVC1815	2022NBT-2994	449974	NBT	HiFi	sheep	feces
RGVC1816	2022NBT-2995_1	114633	NBT	HiFi	sheep	feces
RGVC1817	2022NBT-2998_1	37996	NBT	HiFi	sheep	feces
RGVC1818	2022NBT-30	984187	NBT	HiFi	sheep	feces
RGVC1819	2022NBT-30019_1	74981	NBT	HiFi	sheep	feces
RGVC1820	2022NBT-30048	79645	NBT	HiFi	sheep	feces
RGVC1821	2022NBT-3005	448734	NBT	HiFi	sheep	feces
RGVC1822	2022NBT-3006	448732	NBT	HiFi	sheep	feces
RGVC1823	2022NBT-30067	79597	NBT	HiFi	sheep	feces
RGVC1824	2022NBT-30078_1	69360	NBT	HiFi	sheep	feces
RGVC1825	2022NBT-30090	79531	NBT	HiFi	sheep	feces
RGVC1826	2022NBT-30099	79515	NBT	HiFi	sheep	feces
RGVC1827	2022NBT-3010	448131	NBT	HiFi	sheep	feces
RGVC1828	2022NBT-30102	79510	NBT	HiFi	sheep	feces
RGVC1829	2022NBT-3013	447882	NBT	HiFi	sheep	feces
RGVC1830	2022NBT-3014	447589	NBT	HiFi	sheep	feces
RGVC1831	2022NBT-3015_1	34392	NBT	HiFi	sheep	feces
RGVC1832	2022NBT-30161	79387	NBT	HiFi	sheep	feces
RGVC1833	2022NBT-3017	447388	NBT	HiFi	sheep	feces
RGVC1834	2022NBT-302_1	37255	NBT	HiFi	sheep	feces
RGVC1835	2022NBT-30208	79282	NBT	HiFi	sheep	feces
RGVC1836	2022NBT-30210_1	22896	NBT	HiFi	sheep	feces
RGVC1837	2022NBT-30235	79219	NBT	HiFi	sheep	feces
RGVC1838	2022NBT-30236	79218	NBT	HiFi	sheep	feces
RGVC1839	2022NBT-3024	446515	NBT	HiFi	sheep	feces
RGVC1840	2022NBT-30295	79085	NBT	HiFi	sheep	feces
RGVC1841	2022NBT-30311	79045	NBT	HiFi	sheep	feces
RGVC1842	2022NBT-30316	79038	NBT	HiFi	sheep	feces
RGVC1843	2022NBT-3033_1	36955	NBT	HiFi	sheep	feces
RGVC1844	2022NBT-30332	79007	NBT	HiFi	sheep	feces
RGVC1845	2022NBT-3042	444589	NBT	HiFi	sheep	feces
RGVC1846	2022NBT-3043	444522	NBT	HiFi	sheep	feces
RGVC1847	2022NBT-30443	78736	NBT	HiFi	sheep	feces
RGVC1848	2022NBT-30451	78721	NBT	HiFi	sheep	feces
RGVC1849	2022NBT-30459_1	63834	NBT	HiFi	sheep	feces
RGVC1850	2022NBT-3049	444331	NBT	HiFi	sheep	feces
RGVC1851	2022NBT-30494_1	31295	NBT	HiFi	sheep	feces
RGVC1852	2022NBT-305	885349	NBT	HiFi	sheep	feces
RGVC1853	2022NBT-30518_1	61046	NBT	HiFi	sheep	feces
RGVC1854	2022NBT-3057	443699	NBT	HiFi	sheep	feces
RGVC1855	2022NBT-306	885036	NBT	HiFi	sheep	feces
RGVC1856	2022NBT-3060	443590	NBT	HiFi	sheep	feces
RGVC1857	2022NBT-30630	78306	NBT	HiFi	sheep	feces
RGVC1858	2022NBT-30658	78268	NBT	HiFi	sheep	feces
RGVC1859	2022NBT-3066	443392	NBT	HiFi	sheep	feces
RGVC1860	2022NBT-30664	78258	NBT	HiFi	sheep	feces
RGVC1861	2022NBT-30667	78251	NBT	HiFi	sheep	feces
RGVC1862	2022NBT-30670	78242	NBT	HiFi	sheep	feces
RGVC1863	2022NBT-30676	78235	NBT	HiFi	sheep	feces
RGVC1864	2022NBT-3071	442921	NBT	HiFi	sheep	feces
RGVC1865	2022NBT-30795	77920	NBT	HiFi	sheep	feces
RGVC1866	2022NBT-3081	442295	NBT	HiFi	sheep	feces
RGVC1867	2022NBT-30833	77840	NBT	HiFi	sheep	feces
RGVC1868	2022NBT-30841	77831	NBT	HiFi	sheep	feces
RGVC1869	2022NBT-30874	77738	NBT	HiFi	sheep	feces
RGVC1870	2022NBT-30890	77716	NBT	HiFi	sheep	feces
RGVC1871	2022NBT-30903	77673	NBT	HiFi	sheep	feces
RGVC1872	2022NBT-30910	77659	NBT	HiFi	sheep	feces
RGVC1873	2022NBT-30913	77654	NBT	HiFi	sheep	feces
RGVC1874	2022NBT-30917	77648	NBT	HiFi	sheep	feces
RGVC1875	2022NBT-30949	77563	NBT	HiFi	sheep	feces
RGVC1876	2022NBT-30959	77539	NBT	HiFi	sheep	feces
RGVC1877	2022NBT-30994	77473	NBT	HiFi	sheep	feces
RGVC1878	2022NBT-31	984009	NBT	HiFi	sheep	feces
RGVC1879	2022NBT-310	884203	NBT	HiFi	sheep	feces
RGVC1880	2022NBT-31004	77456	NBT	HiFi	sheep	feces
RGVC1881	2022NBT-31007	77450	NBT	HiFi	sheep	feces
RGVC1882	2022NBT-3103	441148	NBT	HiFi	sheep	feces
RGVC1883	2022NBT-31056	77343	NBT	HiFi	sheep	feces
RGVC1884	2022NBT-3106_1	45758	NBT	HiFi	sheep	feces
RGVC1885	2022NBT-31065	77323	NBT	HiFi	sheep	feces
RGVC1886	2022NBT-31067	77321	NBT	HiFi	sheep	feces
RGVC1887	2022NBT-31068	77319	NBT	HiFi	sheep	feces
RGVC1888	2022NBT-3107	440860	NBT	HiFi	sheep	feces
RGVC1889	2022NBT-31084	77276	NBT	HiFi	sheep	feces
RGVC1890	2022NBT-311	884030	NBT	HiFi	sheep	feces
RGVC1891	2022NBT-3110	440486	NBT	HiFi	sheep	feces
RGVC1892	2022NBT-31107	77235	NBT	HiFi	sheep	feces
RGVC1893	2022NBT-31110	77232	NBT	HiFi	sheep	feces
RGVC1894	2022NBT-3116	439972	NBT	HiFi	sheep	feces
RGVC1895	2022NBT-31197	77065	NBT	HiFi	sheep	feces
RGVC1896	2022NBT-312_1	52055	NBT	HiFi	sheep	feces
RGVC1897	2022NBT-31205	77046	NBT	HiFi	sheep	feces
RGVC1898	2022NBT-31209	77037	NBT	HiFi	sheep	feces
RGVC1899	2022NBT-31216	77023	NBT	HiFi	sheep	feces
RGVC1900	2022NBT-3122_1	47322	NBT	HiFi	sheep	feces
RGVC1901	2022NBT-31248_1	63404	NBT	HiFi	sheep	feces
RGVC1902	2022NBT-3126_1	42492	NBT	HiFi	sheep	feces
RGVC1903	2022NBT-31260	76901	NBT	HiFi	sheep	feces
RGVC1904	2022NBT-3127_1	38776	NBT	HiFi	sheep	feces
RGVC1905	2022NBT-31302	76810	NBT	HiFi	sheep	feces
RGVC1906	2022NBT-31336_1	53862	NBT	HiFi	sheep	feces
RGVC1907	2022NBT-31373	76659	NBT	HiFi	sheep	feces
RGVC1908	2022NBT-31382	76646	NBT	HiFi	sheep	feces
RGVC1909	2022NBT-31390	76628	NBT	HiFi	sheep	feces
RGVC1910	2022NBT-31448	76484	NBT	HiFi	sheep	feces
RGVC1911	2022NBT-31450_1	22881	NBT	HiFi	sheep	feces
RGVC1912	2022NBT-31452	76475	NBT	HiFi	sheep	feces
RGVC1913	2022NBT-31464	76447	NBT	HiFi	sheep	feces
RGVC1914	2022NBT-3148	437569	NBT	HiFi	sheep	feces
RGVC1915	2022NBT-31519	76332	NBT	HiFi	sheep	feces
RGVC1916	2022NBT-3152	437298	NBT	HiFi	sheep	feces
RGVC1917	2022NBT-31549_1	22670	NBT	HiFi	sheep	feces
RGVC1918	2022NBT-31554	76267	NBT	HiFi	sheep	feces
RGVC1919	2022NBT-31573	76227	NBT	HiFi	sheep	feces
RGVC1920	2022NBT-31616	76106	NBT	HiFi	sheep	feces
RGVC1921	2022NBT-31634_1	66056	NBT	HiFi	sheep	feces
RGVC1922	2022NBT-31653_1	57783	NBT	HiFi	sheep	feces
RGVC1923	2022NBT-31665	76018	NBT	HiFi	sheep	feces
RGVC1924	2022NBT-31676	76002	NBT	HiFi	sheep	feces
RGVC1925	2022NBT-3168	435979	NBT	HiFi	sheep	feces
RGVC1926	2022NBT-31682	75993	NBT	HiFi	sheep	feces
RGVC1927	2022NBT-31719	75903	NBT	HiFi	sheep	feces
RGVC1928	2022NBT-31721	75900	NBT	HiFi	sheep	feces
RGVC1929	2022NBT-31726_1	34764	NBT	HiFi	sheep	feces
RGVC1930	2022NBT-3174	435513	NBT	HiFi	sheep	feces
RGVC1931	2022NBT-3175	435503	NBT	HiFi	sheep	feces
RGVC1932	2022NBT-3176_1	125524	NBT	HiFi	sheep	feces
RGVC1933	2022NBT-31765	75799	NBT	HiFi	sheep	feces
RGVC1934	2022NBT-31767	75793	NBT	HiFi	sheep	feces
RGVC1935	2022NBT-3179	435142	NBT	HiFi	sheep	feces
RGVC1936	2022NBT-31801	75709	NBT	HiFi	sheep	feces
RGVC1937	2022NBT-31812	75683	NBT	HiFi	sheep	feces
RGVC1938	2022NBT-31836	75630	NBT	HiFi	sheep	feces
RGVC1939	2022NBT-3184	434624	NBT	HiFi	sheep	feces
RGVC1940	2022NBT-3185	434547	NBT	HiFi	sheep	feces
RGVC1941	2022NBT-3192	434061	NBT	HiFi	sheep	feces
RGVC1942	2022NBT-31973	75325	NBT	HiFi	sheep	feces
RGVC1943	2022NBT-31979	75313	NBT	HiFi	sheep	feces
RGVC1944	2022NBT-31983	75306	NBT	HiFi	sheep	feces
RGVC1945	2022NBT-320	882211	NBT	HiFi	sheep	feces
RGVC1946	2022NBT-32004	75261	NBT	HiFi	sheep	feces
RGVC1947	2022NBT-32019_1	67009	NBT	HiFi	sheep	feces
RGVC1948	2022NBT-32027_1	38871	NBT	HiFi	sheep	feces
RGVC1949	2022NBT-32033_1	67009	NBT	HiFi	sheep	feces
RGVC1950	2022NBT-3205	433353	NBT	HiFi	sheep	feces
RGVC1951	2022NBT-3206_1	54598	NBT	HiFi	sheep	feces
RGVC1952	2022NBT-32069	75123	NBT	HiFi	sheep	feces
RGVC1953	2022NBT-32071	75121	NBT	HiFi	sheep	feces
RGVC1954	2022NBT-32097	75071	NBT	HiFi	sheep	feces
RGVC1955	2022NBT-3211	432743	NBT	HiFi	sheep	feces
RGVC1956	2022NBT-32128	75021	NBT	HiFi	sheep	feces
RGVC1957	2022NBT-3214_1	46789	NBT	HiFi	sheep	feces
RGVC1958	2022NBT-3216	432010	NBT	HiFi	sheep	feces
RGVC1959	2022NBT-3218	431834	NBT	HiFi	sheep	feces
RGVC1960	2022NBT-32199	74849	NBT	HiFi	sheep	feces
RGVC1961	2022NBT-322	881915	NBT	HiFi	sheep	feces
RGVC1962	2022NBT-32212_1	62860	NBT	HiFi	sheep	feces
RGVC1963	2022NBT-32244	74744	NBT	HiFi	sheep	feces
RGVC1964	2022NBT-3225	431347	NBT	HiFi	sheep	feces
RGVC1965	2022NBT-3226_1	54768	NBT	HiFi	sheep	feces
RGVC1966	2022NBT-32271	74672	NBT	HiFi	sheep	feces
RGVC1967	2022NBT-32273	74662	NBT	HiFi	sheep	feces
RGVC1968	2022NBT-32292	74612	NBT	HiFi	sheep	feces
RGVC1969	2022NBT-32319	74549	NBT	HiFi	sheep	feces
RGVC1970	2022NBT-32379	74422	NBT	HiFi	sheep	feces
RGVC1971	2022NBT-3239_1	38467	NBT	HiFi	sheep	feces
RGVC1972	2022NBT-32392_1	35877	NBT	HiFi	sheep	feces
RGVC1973	2022NBT-324	880590	NBT	HiFi	sheep	feces
RGVC1974	2022NBT-32431	74316	NBT	HiFi	sheep	feces
RGVC1975	2022NBT-32443_1	73081	NBT	HiFi	sheep	feces
RGVC1976	2022NBT-32464	74246	NBT	HiFi	sheep	feces
RGVC1977	2022NBT-32489	74191	NBT	HiFi	sheep	feces
RGVC1978	2022NBT-32503_1	33766	NBT	HiFi	sheep	feces
RGVC1979	2022NBT-32504	74162	NBT	HiFi	sheep	feces
RGVC1980	2022NBT-32566	74058	NBT	HiFi	sheep	feces
RGVC1981	2022NBT-32569	74052	NBT	HiFi	sheep	feces
RGVC1982	2022NBT-3258	429774	NBT	HiFi	sheep	feces
RGVC1983	2022NBT-32597	74005	NBT	HiFi	sheep	feces
RGVC1984	2022NBT-32638	73928	NBT	HiFi	sheep	feces
RGVC1985	2022NBT-3265	429052	NBT	HiFi	sheep	feces
RGVC1986	2022NBT-32673	73868	NBT	HiFi	sheep	feces
RGVC1987	2022NBT-32682_1	37034	NBT	HiFi	sheep	feces
RGVC1988	2022NBT-32690	73838	NBT	HiFi	sheep	feces
RGVC1989	2022NBT-32703_1	70128	NBT	HiFi	sheep	feces
RGVC1990	2022NBT-32711_1	44871	NBT	HiFi	sheep	feces
RGVC1991	2022NBT-32716	73776	NBT	HiFi	sheep	feces
RGVC1992	2022NBT-3272	428684	NBT	HiFi	sheep	feces
RGVC1993	2022NBT-32736	73736	NBT	HiFi	sheep	feces
RGVC1994	2022NBT-32741	73725	NBT	HiFi	sheep	feces
RGVC1995	2022NBT-32751	73712	NBT	HiFi	sheep	feces
RGVC1996	2022NBT-32806	73598	NBT	HiFi	sheep	feces
RGVC1997	2022NBT-3286_1	33545	NBT	HiFi	sheep	feces
RGVC1998	2022NBT-3287	428020	NBT	HiFi	sheep	feces
[truncated: 41,983 more rows]

## Sheet: Table S4
Table S4. Genomic estimation of vOTUs
vOTU	Contig	Length	Provirus	Gene_count	Viral_genes	Host_genes	Checkv_quality	Miuvig_quality	Completeness	Completeness_method	Kmer_freq
RGVC1	2022NBT-1	999413	No	874	2	510	High-quality	High-quality	100	HMM-based (lower-bound)	1
RGVC2	2022NBT-10	992972	No	1055	20	746	High-quality	High-quality	100	HMM-based (lower-bound)	1
RGVC3	2022NBT-100485	20271	No	43	0	0	Medium-quality	Genome-fragment	56.24	AAI-based (medium-confidence)	1
RGVC4	2022NBT-100608	20217	No	35	4	0	High-quality	High-quality	100	AAI-based (medium-confidence)	1.1
RGVC5	2022NBT-10062	206229	No	235	5	144	High-quality	High-quality	97.62	HMM-based (lower-bound)	1
RGVC6	2022NBT-10064	206215	No	266	3	125	Medium-quality	Genome-fragment	83.08	HMM-based (lower-bound)	1
RGVC7	2022NBT-10065	206209	No	197	4	136	High-quality	High-quality	100	HMM-based (lower-bound)	1
RGVC8	2022NBT-10069	206125	No	202	7	114	High-quality	High-quality	99.18	HMM-based (lower-bound)	1
RGVC9	2022NBT-10081	205920	No	294	5	56	High-quality	High-quality	100	HMM-based (lower-bound)	1.27
RGVC10	2022NBT-100944	20078	No	20	15	0	Medium-quality	Genome-fragment	62.82	AAI-based (high-confidence)	1
RGVC11	2022NBT-10096	205666	No	194	1	123	High-quality	High-quality	100	HMM-based (lower-bound)	1
RGVC12	2022NBT-10107_1	45776	Yes	224	6	144	Medium-quality	Genome-fragment	58.42	HMM-based (lower-bound)	1
RGVC13	2022NBT-1011	699039	No	625	7	373	High-quality	High-quality	100	HMM-based (lower-bound)	1
RGVC14	2022NBT-10122	205302	No	192	2	101	High-quality	High-quality	100	HMM-based (lower-bound)	1
RGVC15	2022NBT-101271	19936	No	25	11	1	Medium-quality	Genome-fragment	54.85	AAI-based (medium-confidence)	1
RGVC16	2022NBT-1013	698852	No	966	11	386	High-quality	High-quality	100	HMM-based (lower-bound)	1
RGVC17	2022NBT-1014_1	42967	Yes	734	13	458	Complete	High-quality	100	Provirus (medium-confidence)	1
RGVC18	2022NBT-101408	19879	No	24	0	1	High-quality	High-quality	100	AAI-based (medium-confidence)	1.15
RGVC19	2022NBT-1015_1	80748	Yes	621	25	338	High-quality	High-quality	92.96	HMM-based (lower-bound)	1
RGVC20	2022NBT-101566	19821	No	21	0	0	Medium-quality	Genome-fragment	50.49	AAI-based (high-confidence)	1
RGVC21	2022NBT-10157_1	41803	Yes	282	7	138	Medium-quality	Genome-fragment	54.57	HMM-based (lower-bound)	1
RGVC22	2022NBT-101582	19815	No	20	1	4	Medium-quality	Genome-fragment	78.06	AAI-based (high-confidence)	1
RGVC23	2022NBT-101640_1	18522	Yes	32	9	3	Medium-quality	Genome-fragment	51.1	AAI-based (high-confidence)	1
RGVC24	2022NBT-101643	19785	No	34	11	0	Medium-quality	Genome-fragment	50.83	AAI-based (high-confidence)	1
RGVC25	2022NBT-1017_1	44756	Yes	685	24	384	Medium-quality	Genome-fragment	76.02	HMM-based (lower-bound)	1
RGVC26	2022NBT-10175	204439	No	302	4	18	High-quality	High-quality	91.81	HMM-based (lower-bound)	1
RGVC27	2022NBT-10182_1	37478	Yes	55	14	1	High-quality	High-quality	100	AAI-based (high-confidence)	1
RGVC28	2022NBT-10182_2	32381	Yes	56	12	3	Medium-quality	Genome-fragment	50.75	AAI-based (high-confidence)	1
RGVC29	2022NBT-101864	19690	No	26	1	11	High-quality	High-quality	100	HMM-based (lower-bound)	1
RGVC30	2022NBT-10190_1	41668	Yes	276	11	104	Medium-quality	Genome-fragment	72.6	HMM-based (lower-bound)	1
RGVC31	2022NBT-10209	203923	No	224	10	80	High-quality	High-quality	100	HMM-based (lower-bound)	1
RGVC32	2022NBT-1021	697585	No	599	5	364	High-quality	High-quality	100	HMM-based (lower-bound)	1
RGVC33	2022NBT-10218	203704	No	225	2	86	High-quality	High-quality	100	HMM-based (lower-bound)	1
RGVC34	2022NBT-10219_1	44128	Yes	255	25	91	High-quality	High-quality	100	AAI-based (high-confidence)	1
RGVC35	2022NBT-102322	19524	No	27	10	0	Medium-quality	Genome-fragment	89.16	AAI-based (medium-confidence)	1
RGVC36	2022NBT-10237_1	41586	Yes	180	11	109	Medium-quality	Genome-fragment	62.71	HMM-based (lower-bound)	1
RGVC37	2022NBT-1024	697392	No	832	1	351	High-quality	High-quality	100	HMM-based (lower-bound)	1
RGVC38	2022NBT-1025_1	34457	Yes	726	19	456	Medium-quality	Genome-fragment	57.1	HMM-based (lower-bound)	1
RGVC39	2022NBT-10253	203011	No	179	1	96	High-quality	High-quality	100	HMM-based (lower-bound)	1
RGVC40	2022NBT-10257	202840	No	183	6	106	High-quality	High-quality	100	HMM-based (lower-bound)	1
RGVC41	2022NBT-10258_1	52416	Yes	188	40	100	Medium-quality	Genome-fragment	75	HMM-based (lower-bound)	1
RGVC42	2022NBT-1026	696492	No	642	2	395	High-quality	High-quality	100	HMM-based (lower-bound)	1
RGVC43	2022NBT-10261	202741	No	333	41	11	High-quality	High-quality	100	AAI-based (medium-confidence)	1
RGVC44	2022NBT-102619	19394	No	44	6	0	Medium-quality	Genome-fragment	62.2	AAI-based (high-confidence)	1
RGVC45	2022NBT-10278	202459	No	176	1	124	High-quality	High-quality	100	HMM-based (lower-bound)	1
RGVC46	2022NBT-10281	202450	No	303	44	14	High-quality	High-quality	100	AAI-based (medium-confidence)	1
RGVC47	2022NBT-102869	19295	No	25	17	0	Medium-quality	Genome-fragment	54.69	AAI-based (high-confidence)	1
RGVC48	2022NBT-10288	202393	No	165	3	72	Medium-quality	Genome-fragment	86.09	HMM-based (lower-bound)	1
RGVC49	2022NBT-10295	202291	No	303	3	117	High-quality	High-quality	100	HMM-based (lower-bound)	1
RGVC50	2022NBT-103107	19197	No	39	12	0	Medium-quality	Genome-fragment	83.01	AAI-based (medium-confidence)	1
RGVC51	2022NBT-1032	694999	No	754	1	499	High-quality	High-quality	100	HMM-based (lower-bound)	1
RGVC52	2022NBT-10321	201968	No	301	39	7	High-quality	High-quality	97.19	HMM-based (lower-bound)	1
RGVC53	2022NBT-10329	201855	No	200	6	102	High-quality	High-quality	100	HMM-based (lower-bound)	1
RGVC54	2022NBT-10336	201676	No	293	40	6	High-quality	High-quality	100	AAI-based (high-confidence)	1
RGVC55	2022NBT-10345	201523	No	190	2	136	High-quality	High-quality	100	HMM-based (lower-bound)	1
RGVC56	2022NBT-1035	694584	No	669	1	459	High-quality	High-quality	100	HMM-based (lower-bound)	1
RGVC57	2022NBT-10354_1	54006	Yes	182	10	60	Complete	High-quality	100	Provirus (high-confidence)	1
RGVC58	2022NBT-103617	18964	No	38	5	0	Medium-quality	Genome-fragment	52.06	AAI-based (high-confidence)	1
RGVC59	2022NBT-1037_1	38674	Yes	685	11	466	Medium-quality	Genome-fragment	65.68	HMM-based (lower-bound)	1
RGVC60	2022NBT-10374	201151	No	287	3	90	High-quality	High-quality	100	HMM-based (lower-bound)	1
RGVC61	2022NBT-10376	201148	No	234	2	115	High-quality	High-quality	100	HMM-based (lower-bound)	1
RGVC62	2022NBT-1039	694038	No	690	2	354	High-quality	High-quality	100	HMM-based (lower-bound)	1
RGVC63	2022NBT-10395	200919	No	208	5	92	High-quality	High-quality	100	HMM-based (lower-bound)	1
RGVC64	2022NBT-104	957180	No	830	6	597	High-quality	High-quality	100	HMM-based (lower-bound)	1
RGVC65	2022NBT-1040	693814	No	714	15	497	High-quality	High-quality	100	HMM-based (lower-bound)	1
RGVC66	2022NBT-10402	200797	No	164	2	102	High-quality	High-quality	100	HMM-based (lower-bound)	1
RGVC67	2022NBT-104037	18796	No	23	0	8	Medium-quality	Genome-fragment	53.09	AAI-based (medium-confidence)	1
RGVC68	2022NBT-10404_1	41866	Yes	222	11	112	Medium-quality	Genome-fragment	60.53	HMM-based (lower-bound)	1
RGVC69	2022NBT-10411	200637	No	226	42	3	High-quality	High-quality	92.43	AAI-based (medium-confidence)	1
RGVC70	2022NBT-10415	200628	No	288	40	7	High-quality	High-quality	93.96	HMM-based (lower-bound)	1
RGVC71	2022NBT-104156	18750	No	20	2	9	High-quality	High-quality	100	HMM-based (lower-bound)	1
RGVC72	2022NBT-104186	18738	No	19	1	6	High-quality	High-quality	100	HMM-based (lower-bound)	1
RGVC73	2022NBT-10419_1	46462	Yes	236	8	66	Medium-quality	Genome-fragment	64.21	HMM-based (lower-bound)	1
RGVC74	2022NBT-1042	693728	No	605	2	404	High-quality	High-quality	100	HMM-based (lower-bound)	1
RGVC75	2022NBT-10442	200147	No	313	3	84	High-quality	High-quality	100	HMM-based (lower-bound)	1
RGVC76	2022NBT-10445	200086	No	179	2	106	High-quality	High-quality	93.04	HMM-based (lower-bound)	1
RGVC77	2022NBT-10449_1	135606	Yes	270	33	34	High-quality	High-quality	100	AAI-based (medium-confidence)	1
RGVC78	2022NBT-10456	199828	No	294	58	6	High-quality	High-quality	100	AAI-based (medium-confidence)	1
RGVC79	2022NBT-10459	199803	No	325	2	155	High-quality	High-quality	100	HMM-based (lower-bound)	1
RGVC80	2022NBT-104610	18567	No	29	8	0	High-quality	High-quality	98.73	AAI-based (medium-confidence)	1
RGVC81	2022NBT-10464	199749	No	256	1	72	High-quality	High-quality	100	HMM-based (lower-bound)	1
RGVC82	2022NBT-1047	692560	No	628	1	432	High-quality	High-quality	100	HMM-based (lower-bound)	1
RGVC83	2022NBT-10476	199489	No	218	6	135	High-quality	High-quality	100	HMM-based (lower-bound)	1
RGVC84	2022NBT-1048	692530	No	817	4	456	High-quality	High-quality	100	HMM-based (lower-bound)	1
RGVC85	2022NBT-10488	199352	No	213	4	113	High-quality	High-quality	100	HMM-based (lower-bound)	1
RGVC86	2022NBT-104890	18459	No	26	7	0	High-quality	High-quality	97.28	AAI-based (medium-confidence)	1
RGVC87	2022NBT-10492	199296	No	210	1	146	Medium-quality	Genome-fragment	80.95	HMM-based (lower-bound)	1
RGVC88	2022NBT-104978	18426	No	29	16	0	Medium-quality	Genome-fragment	51.58	AAI-based (high-confidence)	1
RGVC89	2022NBT-1050	692364	No	683	7	322	High-quality	High-quality	100	HMM-based (lower-bound)	1.01
RGVC90	2022NBT-10500	199061	No	262	1	107	High-quality	High-quality	100	HMM-based (lower-bound)	1.01
RGVC91	2022NBT-105064	18399	No	26	5	0	Medium-quality	Genome-fragment	58.17	HMM-based (lower-bound)	1
RGVC92	2022NBT-1053	692061	No	618	1	426	High-quality	High-quality	100	HMM-based (lower-bound)	1
RGVC93	2022NBT-10535	198593	No	308	44	14	High-quality	High-quality	100	AAI-based (high-confidence)	1
RGVC94	2022NBT-10537	198586	No	253	1	128	High-quality	High-quality	100	HMM-based (lower-bound)	1
RGVC95	2022NBT-10592_1	53076	Yes	206	15	90	Medium-quality	Genome-fragment	79.36	HMM-based (lower-bound)	1
RGVC96	2022NBT-10596	197779	No	366	9	87	High-quality	High-quality	100	HMM-based (lower-bound)	1
RGVC97	2022NBT-106	956194	No	917	14	513	High-quality	High-quality	100	HMM-based (lower-bound)	1
RGVC98	2022NBT-10600	197670	No	275	2	136	High-quality	High-quality	100	HMM-based (lower-bound)	1
RGVC99	2022NBT-106159	18006	No	21	6	0	Medium-quality	Genome-fragment	60.61	HMM-based (lower-bound)	1
RGVC100	2022NBT-1062	690494	No	1070	2	446	High-quality	High-quality	100	HMM-based (lower-bound)	1
RGVC101	2022NBT-106276	17963	No	24	6	0	Medium-quality	Genome-fragment	60.46	HMM-based (lower-bound)	1
RGVC102	2022NBT-10639	197044	No	170	1	71	Medium-quality	Genome-fragment	58.04	HMM-based (lower-bound)	1
RGVC103	2022NBT-10641	197012	No	347	29	1	High-quality	High-quality	100	AAI-based (high-confidence)	1
RGVC104	2022NBT-10648_1	62489	Yes	280	9	100	Complete	High-quality	100	Provirus (high-confidence)	1
RGVC105	2022NBT-1065	689786	No	675	1	282	High-quality	High-quality	100	HMM-based (lower-bound)	1
RGVC106	2022NBT-10655_1	34543	Yes	228	22	119	Complete	High-quality	100	Provirus (medium-confidence)	1
RGVC107	2022NBT-1066	689408	No	787	3	329	High-quality	High-quality	100	HMM-based (lower-bound)	1
RGVC108	2022NBT-106640	17828	No	32	4	0	Medium-quality	Genome-fragment	54.71	HMM-based (lower-bound)	1
RGVC109	2022NBT-106648	17826	No	25	7	0	Medium-quality	Genome-fragment	89.67	AAI-based (medium-confidence)	1
RGVC110	2022NBT-10666_1	37648	Yes	301	8	123	Medium-quality	Genome-fragment	62.75	HMM-based (lower-bound)	1
RGVC111	2022NBT-106663	17821	No	27	2	0	High-quality	High-quality	100	AAI-based (medium-confidence)	1
RGVC112	2022NBT-1067	689153	No	654	4	479	High-quality	High-quality	100	HMM-based (lower-bound)	1
RGVC113	2022NBT-10676	196499	No	208	1	133	Medium-quality	Genome-fragment	58.95	HMM-based (lower-bound)	1
RGVC114	2022NBT-10680	196453	No	268	8	77	High-quality	High-quality	100	HMM-based (lower-bound)	1
RGVC115	2022NBT-10695	196186	No	188	2	112	High-quality	High-quality	100	HMM-based (lower-bound)	1
RGVC116	2022NBT-1070	688516	No	562	4	366	High-quality	High-quality	90.14	HMM-based (lower-bound)	1
RGVC117	2022NBT-10710_1	52229	Yes	229	22	65	Complete	High-quality	100	Provirus (high-confidence)	1
RGVC118	2022NBT-10714	195911	No	211	5	92	High-quality	High-quality	100	HMM-based (lower-bound)	1
RGVC119	2022NBT-1072	688236	No	703	2	419	High-quality	High-quality	100	HMM-based (lower-bound)	1
RGVC120	2022NBT-107229	17611	No	22	6	0	Medium-quality	Genome-fragment	61.47	HMM-based (lower-bound)	1
RGVC121	2022NBT-107253	17600	No	21	5	0	Medium-quality	Genome-fragment	50.62	AAI-based (high-confidence)	1
RGVC122	2022NBT-10734	195641	No	222	7	18	High-quality	High-quality	95.93	AAI-based (medium-confidence)	1
RGVC123	2022NBT-107346	17574	No	26	8	0	Medium-quality	Genome-fragment	81.05	AAI-based (medium-confidence)	1
RGVC124	2022NBT-10736	195633	No	296	3	137	High-quality	High-quality	100	HMM-based (lower-bound)	1
RGVC125	2022NBT-1074	687727	No	609	8	346	High-quality	High-quality	100	HMM-based (lower-bound)	1
RGVC126	2022NBT-107528	17507	No	31	2	0	Medium-quality	Genome-fragment	75.45	AAI-based (medium-confidence)	1
RGVC127	2022NBT-10759	195356	No	209	4	86	High-quality	High-quality	90.88	HMM-based (lower-bound)	1
RGVC128	2022NBT-1076	687427	No	651	6	435	High-quality	High-quality	100	HMM-based (lower-bound)	1
RGVC129	2022NBT-10764_1	68064	Yes	228	25	73	Complete	High-quality	100	Provirus (high-confidence)	1
RGVC130	2022NBT-10779	195054	No	197	3	99	High-quality	High-quality	100	HMM-based (lower-bound)	1
RGVC131	2022NBT-107805	17413	No	21	7	0	Medium-quality	Genome-fragment	52.34	HMM-based (lower-bound)	1
RGVC132	2022NBT-10783	194995	No	198	11	107	High-quality	High-quality	100	HMM-based (lower-bound)	1
RGVC133	2022NBT-1079	686813	No	662	1	426	High-quality	High-quality	100	HMM-based (lower-bound)	1
RGVC134	2022NBT-10790	194951	No	262	1	84	High-quality	High-quality	100	HMM-based (lower-bound)	1
RGVC135	2022NBT-10791	194947	No	163	7	83	High-quality	High-quality	100	HMM-based (lower-bound)	1
RGVC136	2022NBT-10793	194900	No	222	27	33	High-quality	High-quality	95.1	HMM-based (lower-bound)	1
RGVC137	2022NBT-107951	17359	No	22	8	0	Medium-quality	Genome-fragment	80.07	AAI-based (medium-confidence)	1
RGVC138	2022NBT-10799	194842	No	227	3	99	High-quality	High-quality	100	HMM-based (lower-bound)	1
RGVC139	2022NBT-1080_1	41621	Yes	677	19	429	Medium-quality	Genome-fragment	55.43	HMM-based (lower-bound)	1
RGVC140	2022NBT-10800_1	133692	Yes	338	28	53	Complete	High-quality	100	Provirus (medium-confidence)	1
RGVC141	2022NBT-108006	17339	No	20	1	1	High-quality	High-quality	100	AAI-based (medium-confidence)	1
RGVC142	2022NBT-108135	17295	No	23	1	2	High-quality	High-quality	100	HMM-based (lower-bound)	1
RGVC143	2022NBT-10853	194081	No	191	11	108	High-quality	High-quality	98.3	HMM-based (lower-bound)	1
RGVC144	2022NBT-108591	17119	No	26	7	0	High-quality	High-quality	90.09	AAI-based (medium-confidence)	1
RGVC145	2022NBT-10861	193839	No	243	2	128	High-quality	High-quality	100	HMM-based (lower-bound)	1
RGVC146	2022NBT-108708	17071	No	25	5	0	Medium-quality	Genome-fragment	59.58	HMM-based (lower-bound)	1
RGVC147	2022NBT-108818	17034	No	22	2	1	High-quality	High-quality	100	HMM-based (lower-bound)	1
RGVC148	2022NBT-10885	193614	No	190	2	146	High-quality	High-quality	100	HMM-based (lower-bound)	1
RGVC149	2022NBT-109202	16901	No	23	0	0	Medium-quality	Genome-fragment	58.42	AAI-based (medium-confidence)	1
RGVC150	2022NBT-10921_1	51687	Yes	219	9	61	Medium-quality	Genome-fragment	69.72	HMM-based (lower-bound)	1
RGVC151	2022NBT-1093_1	122382	Yes	707	38	391	Medium-quality	Genome-fragment	74.14	HMM-based (lower-bound)	1
RGVC152	2022NBT-1094	684217	No	974	3	500	High-quality	High-quality	100	HMM-based (lower-bound)	1
RGVC153	2022NBT-109537	16777	No	25	1	1	High-quality	High-quality	100	HMM-based (lower-bound)	1
RGVC154	2022NBT-109576	16761	No	21	7	0	Medium-quality	Genome-fragment	62.22	AAI-based (high-confidence)	1
RGVC155	2022NBT-1096	683258	No	604	3	412	High-quality	High-quality	100	HMM-based (lower-bound)	1
RGVC156	2022NBT-109608	16749	No	30	11	0	Medium-quality	Genome-fragment	53.58	AAI-based (high-confidence)	1
RGVC157	2022NBT-1099	682812	No	625	4	433	High-quality	High-quality	100	HMM-based (lower-bound)	1
RGVC158	2022NBT-109932	16641	No	23	4	0	High-quality	High-quality	100	AAI-based (medium-confidence)	1
RGVC159	2022NBT-110_1	38547	Yes	851	25	591	Medium-quality	Genome-fragment	62.12	HMM-based (lower-bound)	1
RGVC160	2022NBT-11003	191643	No	203	2	89	High-quality	High-quality	100	HMM-based (lower-bound)	1
RGVC161	2022NBT-11004_1	53747	Yes	223	18	86	Medium-quality	Genome-fragment	71.88	HMM-based (lower-bound)	1
RGVC162	2022NBT-11012	191515	No	158	9	87	High-quality	High-quality	100	HMM-based (lower-bound)	1
RGVC163	2022NBT-110186	16551	No	23	1	0	High-quality	High-quality	99.6	AAI-based (high-confidence)	1
RGVC164	2022NBT-11035	191136	No	203	5	122	High-quality	High-quality	100	HMM-based (lower-bound)	1
RGVC165	2022NBT-1104	681581	No	621	4	387	High-quality	High-quality	100	HMM-based (lower-bound)	1
RGVC166	2022NBT-11040	191010	No	263	2	103	High-quality	High-quality	100	HMM-based (lower-bound)	1
RGVC167	2022NBT-110460	16440	No	17	5	0	High-quality	High-quality	100	AAI-based (medium-confidence)	1
RGVC168	2022NBT-11047_1	35464	Yes	301	2	142	Medium-quality	Genome-fragment	54.17	HMM-based (lower-bound)	1
RGVC169	2022NBT-11053	190777	No	172	4	83	High-quality	High-quality	100	HMM-based (lower-bound)	1
RGVC170	2022NBT-110639	16372	No	19	1	0	High-quality	High-quality	98.53	AAI-based (high-confidence)	1
RGVC171	2022NBT-11077	190429	No	294	35	2	High-quality	High-quality	100	AAI-based (medium-confidence)	1
RGVC172	2022NBT-110861	16292	No	20	7	0	Medium-quality	Genome-fragment	83.48	AAI-based (medium-confidence)	1
RGVC173	2022NBT-11106_1	44616	Yes	211	21	77	Complete	High-quality	100	Provirus (high-confidence)	1
RGVC174	2022NBT-11110	190068	No	184	1	124	High-quality	High-quality	100	HMM-based (lower-bound)	1
RGVC175	2022NBT-11116	190003	No	164	11	91	High-quality	High-quality	100	HMM-based (lower-bound)	1
RGVC176	2022NBT-111227	16149	No	25	1	1	High-quality	High-quality	100	AAI-based (medium-confidence)	1
RGVC177	2022NBT-11126_1	39009	Yes	221	13	93	Medium-quality	Genome-fragment	54.72	HMM-based (lower-bound)	1
RGVC178	2022NBT-11127	189880	No	172	1	94	High-quality	High-quality	100	HMM-based (lower-bound)	1
RGVC179	2022NBT-11144	189577	No	176	3	96	High-quality	High-quality	100	HMM-based (lower-bound)	1
RGVC180	2022NBT-11157	189413	No	198	3	50	High-quality	High-quality	90.59	HMM-based (lower-bound)	1
RGVC181	2022NBT-11158_1	183093	Yes	160	4	13	High-quality	High-quality	94.4	HMM-based (lower-bound)	1.02
RGVC182	2022NBT-11160	189344	No	181	2	81	High-quality	High-quality	100	HMM-based (lower-bound)	1
RGVC183	2022NBT-11165	189299	No	169	9	88	High-quality	High-quality	100	HMM-based (lower-bound)	1
RGVC184	2022NBT-11167	189263	No	199	4	121	High-quality	High-quality	100	HMM-based (lower-bound)	1
RGVC185	2022NBT-11169	189253	No	149	2	97	High-quality	High-quality	100	HMM-based (lower-bound)	1
RGVC186	2022NBT-1117	679367	No	609	2	426	High-quality	High-quality	100	HMM-based (lower-bound)	1
RGVC187	2022NBT-111741	15971	No	26	3	0	Medium-quality	Genome-fragment	57.5	AAI-based (medium-confidence)	1
RGVC188	2022NBT-11175_1	60180	Yes	239	16	85	Complete	High-quality	100	Provirus (high-confidence)	1
RGVC189	2022NBT-1118	678525	No	710	1	498	High-quality	High-quality	100	HMM-based (lower-bound)	1
RGVC190	2022NBT-111830	15944	No	20	0	0	Medium-quality	Genome-fragment	87.65	AAI-based (medium-confidence)	1
RGVC191	2022NBT-1119	678461	No	723	3	396	High-quality	High-quality	90.53	HMM-based (lower-bound)	1
RGVC192	2022NBT-111949	15902	No	20	6	0	Medium-quality	Genome-fragment	85.09	AAI-based (medium-confidence)	1
RGVC193	2022NBT-11195	188964	No	238	1	97	High-quality	High-quality	100	HMM-based (lower-bound)	1
RGVC194	2022NBT-112	954306	No	955	4	672	High-quality	High-quality	100	HMM-based (lower-bound)	1
RGVC195	2022NBT-1120_1	50880	Yes	568	23	351	Complete	High-quality	100	Provirus (medium-confidence)	1
RGVC196	2022NBT-11201	188849	No	176	8	99	High-quality	High-quality	100	HMM-based (lower-bound)	1
RGVC197	2022NBT-1121	677625	No	623	1	387	High-quality	High-quality	100	HMM-based (lower-bound)	1
RGVC198	2022NBT-11223	188553	No	257	2	74	High-quality	High-quality	100	HMM-based (lower-bound)	1
RGVC199	2022NBT-11225	188510	No	207	2	106	High-quality	High-quality	100	HMM-based (lower-bound)	1
RGVC200	2022NBT-112465	15717	No	23	1	1	High-quality	High-quality	100	HMM-based (lower-bound)	1
RGVC201	2022NBT-11249	188162	No	179	5	92	High-quality	High-quality	100	HMM-based (lower-bound)	1
RGVC202	2022NBT-11259_1	38663	Yes	187	16	98	Medium-quality	Genome-fragment	68.75	HMM-based (lower-bound)	1
RGVC203	2022NBT-11263	187961	No	295	1	81	High-quality	High-quality	100	HMM-based (lower-bound)	1
RGVC204	2022NBT-11287	187610	No	208	4	115	High-quality	High-quality	100	HMM-based (lower-bound)	1
RGVC205	2022NBT-1129	676139	No	603	10	420	High-quality	High-quality	100	HMM-based (lower-bound)	1
RGVC206	2022NBT-11294	187535	No	201	6	130	High-quality	High-quality	100	HMM-based (lower-bound)	1
RGVC207	2022NBT-11296_1	78795	Yes	245	11	62	Medium-quality	Genome-fragment	79.66	HMM-based (lower-bound)	1
RGVC208	2022NBT-11310	187311	No	197	4	98	High-quality	High-quality	98.69	HMM-based (lower-bound)	1
RGVC209	2022NBT-1132	675640	No	590	2	372	High-quality	High-quality	100	HMM-based (lower-bound)	1
RGVC210	2022NBT-11327_1	55020	Yes	248	7	90	Medium-quality	Genome-fragment	76.15	HMM-based (lower-bound)	1
RGVC211	2022NBT-11332	187071	No	300	2	99	High-quality	High-quality	100	HMM-based (lower-bound)	1
RGVC212	2022NBT-11334	187054	No	194	3	122	High-quality	High-quality	100	HMM-based (lower-bound)	1
RGVC213	2022NBT-11339	186990	No	275	4	142	High-quality	High-quality	100	HMM-based (lower-bound)	1
RGVC214	2022NBT-11348	186889	No	144	1	90	High-quality	High-quality	100	HMM-based (lower-bound)	1
RGVC215	2022NBT-1136_1	40525	Yes	573	17	342	Medium-quality	Genome-fragment	57.88	HMM-based (lower-bound)	1
RGVC216	2022NBT-11391	186251	No	174	2	105	High-quality	High-quality	100	HMM-based (lower-bound)	1
RGVC217	2022NBT-11406	186090	No	190	1	110	Medium-quality	Genome-fragment	52.68	HMM-based (lower-bound)	1
RGVC218	2022NBT-1141_1	52434	Yes	917	31	407	Medium-quality	Genome-fragment	68.32	HMM-based (lower-bound)	1
RGVC219	2022NBT-114144	15135	No	13	6	0	Medium-quality	Genome-fragment	77.29	AAI-based (high-confidence)	1
RGVC220	2022NBT-11426	185714	No	208	9	2	High-quality	High-quality	94.5	AAI-based (medium-confidence)	1
RGVC221	2022NBT-11437	185528	No	202	1	134	Medium-quality	Genome-fragment	54.65	HMM-based (lower-bound)	1
RGVC222	2022NBT-114386	15059	No	16	1	4	High-quality	High-quality	100	HMM-based (lower-bound)	1
RGVC223	2022NBT-1144	673718	No	714	6	429	High-quality	High-quality	100	HMM-based (lower-bound)	1
RGVC224	2022NBT-114425	15047	No	26	1	1	High-quality	High-quality	100	AAI-based (medium-confidence)	1
RGVC225	2022NBT-114508	15015	No	19	0	0	High-quality	High-quality	92.78	AAI-based (medium-confidence)	1
RGVC226	2022NBT-11459	185205	No	194	2	94	High-quality	High-quality	100	HMM-based (lower-bound)	1
RGVC227	2022NBT-11465_1	45622	Yes	224	12	128	Medium-quality	Genome-fragment	61.86	HMM-based (lower-bound)	1
RGVC228	2022NBT-11479	185024	No	173	1	116	High-quality	High-quality	96.98	HMM-based (lower-bound)	1
RGVC229	2022NBT-11485	184953	No	196	1	110	Medium-quality	Genome-fragment	85.52	HMM-based (lower-bound)	1
RGVC230	2022NBT-1149	673250	No	695	6	373	High-quality	High-quality	100	HMM-based (lower-bound)	1
RGVC231	2022NBT-11498_1	36221	Yes	205	21	104	Medium-quality	Genome-fragment	61.56	HMM-based (lower-bound)	1
RGVC232	2022NBT-1150_1	65693	Yes	583	21	312	Complete	High-quality	100	Provirus (high-confidence)	1
RGVC233	2022NBT-11506	184666	No	292	3	107	High-quality	High-quality	100	HMM-based (lower-bound)	1
RGVC234	2022NBT-1151	672889	No	651	3	389	Medium-quality	Genome-fragment	62.17	HMM-based (lower-bound)	1
RGVC235	2022NBT-1152	672545	No	858	2	562	High-quality	High-quality	100	HMM-based (lower-bound)	1
RGVC236	2022NBT-11525	184400	No	174	5	108	High-quality	High-quality	100	HMM-based (lower-bound)	1
RGVC237	2022NBT-115430	14726	No	19	4	1	High-quality	High-quality	100	AAI-based (high-confidence)	1
RGVC238	2022NBT-11548	184131	No	197	1	130	High-quality	High-quality	99.87	HMM-based (lower-bound)	1
RGVC239	2022NBT-11553_1	36804	Yes	213	23	126	Medium-quality	Genome-fragment	75.74	HMM-based (lower-bound)	1
RGVC240	2022NBT-1157	671321	No	632	1	419	High-quality	High-quality	100	HMM-based (lower-bound)	1
RGVC241	2022NBT-11574_1	105988	Yes	323	5	92	High-quality	High-quality	97.32	HMM-based (lower-bound)	1
RGVC242	2022NBT-11585	183697	No	245	12	3	High-quality	High-quality	100	AAI-based (medium-confidence)	1
RGVC243	2022NBT-11591_1	45959	Yes	164	5	72	Medium-quality	Genome-fragment	80.27	HMM-based (lower-bound)	1
RGVC244	2022NBT-115912	14564	No	23	4	0	Medium-quality	Genome-fragment	64.27	AAI-based (high-confidence)	1
RGVC245	2022NBT-11592_1	31628	Yes	221	5	105	Medium-quality	Genome-fragment	61.26	HMM-based (lower-bound)	1
RGVC246	2022NBT-116019	14523	No	23	2	0	High-quality	High-quality	94.6	AAI-based (high-confidence)	1
RGVC247	2022NBT-11606	183403	No	257	48	2	High-quality	High-quality	100	AAI-based (medium-confidence)	1
RGVC248	2022NBT-11609	183368	No	259	1	130	High-quality	High-quality	100	HMM-based (lower-bound)	1
RGVC249	2022NBT-1162	670898	No	741	5	437	High-quality	High-quality	100	HMM-based (lower-bound)	1
RGVC250	2022NBT-11621	183252	No	169	4	88	High-quality	High-quality	100	HMM-based (lower-bound)	1
RGVC251	2022NBT-116234	14458	No	22	2	0	Complete	High-quality	100	DTR (high-confidence)	1
RGVC252	2022NBT-11624	183208	No	163	1	110	High-quality	High-quality	100	HMM-based (lower-bound)	1
RGVC253	2022NBT-11625_1	64533	Yes	307	17	81	Complete	High-quality	100	Provirus (medium-confidence)	1
RGVC254	2022NBT-11627	183197	No	231	1	134	High-quality	High-quality	100	HMM-based (lower-bound)	1
RGVC255	2022NBT-1163_1	41923	Yes	775	8	478	Medium-quality	Genome-fragment	54.62	HMM-based (lower-bound)	1
RGVC256	2022NBT-11637	183092	No	303	1	96	Medium-quality	Genome-fragment	66.04	HMM-based (lower-bound)	1
RGVC257	2022NBT-1165	670347	No	551	5	330	High-quality	High-quality	100	HMM-based (lower-bound)	1
RGVC258	2022NBT-116770	14291	No	19	5	0	Medium-quality	Genome-fragment	50.05	HMM-based (lower-bound)	1
RGVC259	2022NBT-116825	14271	No	24	0	0	High-quality	High-quality	100	AAI-based (medium-confidence)	1.15
RGVC260	2022NBT-1169	669870	No	708	1	510	High-quality	High-quality	100	HMM-based (lower-bound)	1
RGVC261	2022NBT-11699	182318	No	310	42	8	High-quality	High-quality	100	AAI-based (high-confidence)	1
RGVC262	2022NBT-117	951688	No	831	6	535	High-quality	High-quality	100	HMM-based (lower-bound)	1
RGVC263	2022NBT-1171	669167	No	668	4	362	High-quality	High-quality	100	HMM-based (lower-bound)	1.02
RGVC264	2022NBT-11721	182076	No	182	1	109	High-quality	High-quality	100	HMM-based (lower-bound)	1
RGVC265	2022NBT-117247	14141	No	25	8	0	High-quality	High-quality	100	AAI-based (high-confidence)	1
RGVC266	2022NBT-117428	14079	No	16	1	1	Medium-quality	Genome-fragment	86.88	AAI-based (medium-confidence)	1
RGVC267	2022NBT-11744	181851	No	181	7	117	High-quality	High-quality	100	HMM-based (lower-bound)	1
RGVC268	2022NBT-11746_1	60062	Yes	254	9	57	High-quality	High-quality	92.49	AAI-based (medium-confidence)	1
RGVC269	2022NBT-11747	181847	No	144	2	98	High-quality	High-quality	95.75	HMM-based (lower-bound)	1
RGVC270	2022NBT-11749	181836	No	289	4	98	High-quality	High-quality	100	HMM-based (lower-bound)	1
RGVC271	2022NBT-1175	668548	No	813	4	441	High-quality	High-quality	100	HMM-based (lower-bound)	1
RGVC272	2022NBT-11750	181814	No	245	1	97	High-quality	High-quality	100	HMM-based (lower-bound)	1
RGVC273	2022NBT-1176	668111	No	571	1	393	High-quality	High-quality	100	HMM-based (lower-bound)	1.01
RGVC274	2022NBT-11774	181487	No	208	8	1	High-quality	High-quality	92.35	AAI-based (medium-confidence)	1
RGVC275	2022NBT-117764	13971	No	19	8	1	Complete	High-quality	100	DTR (high-confidence)	1
RGVC276	2022NBT-1178	667480	No	584	1	392	High-quality	High-quality	100	HMM-based (lower-bound)	1
RGVC277	2022NBT-11823	180910	No	171	2	103	High-quality	High-quality	91.81	HMM-based (lower-bound)	1
RGVC278	2022NBT-11825_1	32835	Yes	214	13	81	Medium-quality	Genome-fragment	50.08	HMM-based (lower-bound)	1
RGVC279	2022NBT-118291	13797	No	18	1	2	High-quality	High-quality	100	HMM-based (lower-bound)	1
RGVC280	2022NBT-1183	666817	No	584	2	362	High-quality	High-quality	100	HMM-based (lower-bound)	1
RGVC281	2022NBT-1185	666704	No	682	2	476	High-quality	High-quality	100	HMM-based (lower-bound)	1
RGVC282	2022NBT-1187	665705	No	644	7	378	High-quality	High-quality	100	HMM-based (lower-bound)	1
RGVC283	2022NBT-118829	13638	No	16	5	0	High-quality	High-quality	100	AAI-based (medium-confidence)	1
RGVC284	2022NBT-11885	180242	No	166	1	94	Medium-quality	Genome-fragment	73.26	HMM-based (lower-bound)	1
RGVC285	2022NBT-1189	665359	No	655	5	397	High-quality	High-quality	100	HMM-based (lower-bound)	1
RGVC286	2022NBT-118909	13609	No	12	1	0	High-quality	High-quality	100	HMM-based (lower-bound)	1
RGVC287	2022NBT-119_1	50222	Yes	787	12	568	Medium-quality	Genome-fragment	61.6	HMM-based (lower-bound)	1
RGVC288	2022NBT-1191	665195	No	615	5	294	High-quality	High-quality	100	HMM-based (lower-bound)	1
RGVC289	2022NBT-11911	179970	No	222	26	98	High-quality	High-quality	98.88	HMM-based (lower-bound)	1
RGVC290	2022NBT-1192	664866	No	838	1	520	High-quality	High-quality	100	HMM-based (lower-bound)	1
RGVC291	2022NBT-11929	179635	No	282	7	49	High-quality	High-quality	98.21	HMM-based (lower-bound)	1
RGVC292	2022NBT-11933_1	61453	Yes	244	12	102	Complete	High-quality	100	Provirus (medium-confidence)	1
RGVC293	2022NBT-119334	13489	No	19	4	0	High-quality	High-quality	99.2	AAI-based (medium-confidence)	1
RGVC294	2022NBT-1195	664411	No	652	4	428	High-quality	High-quality	100	HMM-based (lower-bound)	1
RGVC295	2022NBT-1196_1	34237	Yes	752	24	398	Medium-quality	Genome-fragment	50.37	HMM-based (lower-bound)	1
RGVC296	2022NBT-119606	13396	No	12	1	2	Medium-quality	Genome-fragment	86.51	AAI-based (high-confidence)	1
RGVC297	2022NBT-11966	179240	No	239	26	3	High-quality	High-quality	92.89	HMM-based (lower-bound)	1
RGVC298	2022NBT-1197	663783	No	607	23	423	High-quality	High-quality	100	HMM-based (lower-bound)	1
RGVC299	2022NBT-119795	13337	No	11	1	2	Medium-quality	Genome-fragment	86.22	AAI-based (medium-confidence)	1
RGVC300	2022NBT-1199	663237	No	715	11	523	High-quality	High-quality	100	HMM-based (lower-bound)	1
RGVC301	2022NBT-119922	13296	No	19	4	0	High-quality	High-quality	97.63	AAI-based (medium-confidence)	1
RGVC302	2022NBT-11996	178924	No	173	2	104	Medium-quality	Genome-fragment	77.61	HMM-based (lower-bound)	1
RGVC303	2022NBT-12	990766	No	946	3	591	High-quality	High-quality	100	HMM-based (lower-bound)	1
RGVC304	2022NBT-1200	663158	No	1029	2	482	High-quality	High-quality	100	HMM-based (lower-bound)	1
RGVC305	2022NBT-1201_1	34295	Yes	683	18	427	Medium-quality	Genome-fragment	60.02	HMM-based (lower-bound)	1
RGVC306	2022NBT-1202	662662	No	697	2	357	High-quality	High-quality	100	HMM-based (lower-bound)	1.02
RGVC307	2022NBT-1203	662233	No	577	8	313	High-quality	High-quality	100	HMM-based (lower-bound)	1
RGVC308	2022NBT-120311	13174	No	23	0	3	High-quality	High-quality	100	AAI-based (medium-confidence)	1
RGVC309	2022NBT-12040	178377	No	156	2	95	High-quality	High-quality	100	HMM-based (lower-bound)	1
RGVC310	2022NBT-120427	13142	No	15	0	0	Medium-quality	Genome-fragment	72.25	AAI-based (medium-confidence)	1
RGVC311	2022NBT-1205	661613	No	576	4	319	High-quality	High-quality	100	HMM-based (lower-bound)	1
RGVC312	2022NBT-12050	178230	No	211	11	129	High-quality	High-quality	100	HMM-based (lower-bound)	1
RGVC313	2022NBT-12054	178181	No	317	2	63	High-quality	High-quality	100	HMM-based (lower-bound)	1
RGVC314	2022NBT-120573	13101	No	18	0	0	Medium-quality	Genome-fragment	81.33	AAI-based (medium-confidence)	1
RGVC315	2022NBT-120799	13040	No	25	10	0	Medium-quality	Genome-fragment	57.68	AAI-based (medium-confidence)	1
RGVC316	2022NBT-120838	13028	No	11	1	1	Medium-quality	Genome-fragment	83.87	AAI-based (high-confidence)	1
RGVC317	2022NBT-1209	661226	No	829	5	555	High-quality	High-quality	100	HMM-based (lower-bound)	1
RGVC318	2022NBT-12115_1	101489	Yes	260	4	101	Medium-quality	Genome-fragment	79.87	HMM-based (lower-bound)	1
RGVC319	2022NBT-12126_1	81452	Yes	264	32	57	High-quality	High-quality	96.44	HMM-based (lower-bound)	1
RGVC320	2022NBT-121262	12895	No	17	5	0	High-quality	High-quality	100	AAI-based (medium-confidence)	1
RGVC321	2022NBT-12130	177378	No	252	4	112	High-quality	High-quality	100	HMM-based (lower-bound)	1
RGVC322	2022NBT-12133	177266	No	206	1	110	High-quality	High-quality	100	HMM-based (lower-bound)	1
RGVC323	2022NBT-121624_1	7661	Yes	15	4	3	High-quality	High-quality	98.76	HMM-based (lower-bound)	1
RGVC324	2022NBT-1217	659995	No	574	4	365	High-quality	High-quality	100	HMM-based (lower-bound)	1
RGVC325	2022NBT-122	947495	No	812	2	585	High-quality	High-quality	100	HMM-based (lower-bound)	1
RGVC326	2022NBT-1220	659383	No	684	2	468	High-quality	High-quality	100	HMM-based (lower-bound)	1
RGVC327	2022NBT-12206	176199	No	205	3	129	High-quality	High-quality	100	HMM-based (lower-bound)	1
RGVC328	2022NBT-12207	176186	No	237	27	3	High-quality	High-quality	93.8	HMM-based (lower-bound)	1
RGVC329	2022NBT-12228	175952	No	175	2	100	High-quality	High-quality	100	HMM-based (lower-bound)	1
RGVC330	2022NBT-1224	658819	No	443	2	250	High-quality	High-quality	100	HMM-based (lower-bound)	1
RGVC331	2022NBT-122577	12489	No	26	0	0	Medium-quality	Genome-fragment	64.09	AAI-based (medium-confidence)	1.85
RGVC332	2022NBT-12259	175653	No	339	14	54	High-quality	High-quality	99.42	HMM-based (lower-bound)	1
RGVC333	2022NBT-1226_1	50770	Yes	624	15	422	Medium-quality	Genome-fragment	76.31	HMM-based (lower-bound)	1
RGVC334	2022NBT-122969	12363	No	19	4	0	High-quality	High-quality	96.12	AAI-based (medium-confidence)	1
RGVC335	2022NBT-1231	657910	No	542	1	351	High-quality	High-quality	100	HMM-based (lower-bound)	1
RGVC336	2022NBT-12330_1	42048	Yes	169	4	75	Medium-quality	Genome-fragment	72.78	HMM-based (lower-bound)	1
RGVC337	2022NBT-12352_1	29651	Yes	212	11	51	Medium-quality	Genome-fragment	51.1	HMM-based (lower-bound)	1
RGVC338	2022NBT-12369	174197	No	173	5	100	High-quality	High-quality	100	HMM-based (lower-bound)	1
RGVC339	2022NBT-1237_1	33998	Yes	649	20	409	Medium-quality	Genome-fragment	61.19	HMM-based (lower-bound)	1
RGVC340	2022NBT-123730	12147	No	14	1	1	High-quality	High-quality	91.68	AAI-based (medium-confidence)	1
RGVC341	2022NBT-12387	174004	No	146	1	89	High-quality	High-quality	100	HMM-based (lower-bound)	1
RGVC342	2022NBT-12393_1	30731	Yes	263	9	99	Medium-quality	Genome-fragment	53.06	HMM-based (lower-bound)	1
RGVC343	2022NBT-12410	173744	No	158	2	100	High-quality	High-quality	100	HMM-based (lower-bound)	1
RGVC344	2022NBT-12423	173660	No	149	2	104	High-quality	High-quality	100	HMM-based (lower-bound)	1
RGVC345	2022NBT-1243	656474	No	572	2	332	High-quality	High-quality	100	HMM-based (lower-bound)	1
RGVC346	2022NBT-124319	11980	No	13	0	0	High-quality	High-quality	100	AAI-based (high-confidence)	2.75
RGVC347	2022NBT-124324	11979	No	17	1	0	High-quality	High-quality	93.1	AAI-based (medium-confidence)	1
RGVC348	2022NBT-12436	173501	No	227	1	136	High-quality	High-quality	100	HMM-based (lower-bound)	1
RGVC349	2022NBT-124426	11954	No	16	0	0	Medium-quality	Genome-fragment	65.72	AAI-based (medium-confidence)	1
RGVC350	2022NBT-12445_1	41106	Yes	199	10	80	Medium-quality	Genome-fragment	63.86	HMM-based (lower-bound)	1
RGVC351	2022NBT-124538	11922	No	19	2	0	Medium-quality	Genome-fragment	89.67	AAI-based (high-confidence)	1
RGVC352	2022NBT-12455	173317	No	153	2	70	High-quality	High-quality	100	HMM-based (lower-bound)	1
RGVC353	2022NBT-12457	173285	No	177	11	114	High-quality	High-quality	100	HMM-based (lower-bound)	1
RGVC354	2022NBT-1246	655926	No	628	2	467	High-quality	High-quality	100	HMM-based (lower-bound)	1
RGVC355	2022NBT-124601	11908	No	14	1	2	High-quality	High-quality	100	HMM-based (lower-bound)	1
RGVC356	2022NBT-12468	173134	No	211	4	76	High-quality	High-quality	100	HMM-based (lower-bound)	1
RGVC357	2022NBT-12475	173015	No	225	1	137	High-quality	High-quality	100	HMM-based (lower-bound)	1
RGVC358	2022NBT-12483	172942	No	191	10	106	High-quality	High-quality	100	HMM-based (lower-bound)	1
RGVC359	2022NBT-12495	172754	No	197	23	28	High-quality	High-quality	98.13	HMM-based (lower-bound)	1
RGVC360	2022NBT-125_1	59756	Yes	848	31	427	Complete	High-quality	100	Provirus (medium-confidence)	1
RGVC361	2022NBT-12516_1	51234	Yes	198	11	81	Medium-quality	Genome-fragment	66.88	HMM-based (lower-bound)	1
RGVC362	2022NBT-125356	11698	No	22	1	0	Medium-quality	Genome-fragment	80.01	AAI-based (medium-confidence)	1
RGVC363	2022NBT-12539	172230	No	193	3	59	High-quality	High-quality	99.64	HMM-based (lower-bound)	1
RGVC364	2022NBT-1254	654200	No	577	3	347	High-quality	High-quality	100	HMM-based (lower-bound)	1
RGVC365	2022NBT-1255	654098	No	641	4	443	High-quality	High-quality	100	HMM-based (lower-bound)	1
RGVC366	2022NBT-12563	171995	No	226	3	77	High-quality	High-quality	100	HMM-based (lower-bound)	1
RGVC367	2022NBT-12564	171988	No	245	1	83	High-quality	High-quality	100	HMM-based (lower-bound)	1
RGVC368	2022NBT-12566	171977	No	150	3	73	High-quality	High-quality	100	HMM-based (lower-bound)	1
RGVC369	2022NBT-125666	11618	No	18	1	0	High-quality	High-quality	100	AAI-based (medium-confidence)	1
RGVC370	2022NBT-1257	654022	No	623	1	370	High-quality	High-quality	100	HMM-based (lower-bound)	1
RGVC371	2022NBT-12577_1	44379	Yes	169	13	93	High-quality	High-quality	94.61	AAI-based (medium-confidence)	1
RGVC372	2022NBT-1258	653489	No	523	5	398	High-quality	High-quality	100	HMM-based (lower-bound)	1
RGVC373	2022NBT-12587_1	39943	Yes	207	12	105	Medium-quality	Genome-fragment	55.57	HMM-based (lower-bound)	1
RGVC374	2022NBT-12589_1	168648	Yes	192	9	119	High-quality	High-quality	100	HMM-based (lower-bound)	1
RGVC375	2022NBT-126	945784	No	1222	5	667	High-quality	High-quality	100	HMM-based (lower-bound)	1
RGVC376	2022NBT-126266	11463	No	19	5	0	High-quality	High-quality	97.39	AAI-based (high-confidence)	1
RGVC377	2022NBT-12628	171334	No	214	5	80	High-quality	High-quality	90.28	HMM-based (lower-bound)	1
RGVC378	2022NBT-126358	11430	No	19	4	0	High-quality	High-quality	97.11	AAI-based (high-confidence)	1
RGVC379	2022NBT-12636	171253	No	203	2	104	Medium-quality	Genome-fragment	88.92	HMM-based (lower-bound)	1
RGVC380	2022NBT-126475	11400	No	15	0	0	Medium-quality	Genome-fragment	68.6	AAI-based (medium-confidence)	1
RGVC381	2022NBT-1266	651142	No	499	1	336	High-quality	High-quality	100	HMM-based (lower-bound)	1
RGVC382	2022NBT-126696	11342	No	16	1	0	Medium-quality	Genome-fragment	70.02	AAI-based (medium-confidence)	1
RGVC383	2022NBT-1267	651116	No	673	2	423	High-quality	High-quality	100	HMM-based (lower-bound)	1
RGVC384	2022NBT-12672	170866	No	170	1	58	High-quality	High-quality	100	HMM-based (lower-bound)	1
RGVC385	2022NBT-126720	11335	No	12	0	0	Medium-quality	Genome-fragment	70.38	AAI-based (medium-confidence)	1
RGVC386	2022NBT-12676	170818	No	267	1	107	High-quality	High-quality	100	HMM-based (lower-bound)	1
RGVC387	2022NBT-126760	11324	No	12	2	0	High-quality	High-quality	100	HMM-based (lower-bound)	1
RGVC388	2022NBT-12716	170378	No	161	3	102	Medium-quality	Genome-fragment	64.4	HMM-based (lower-bound)	1
RGVC389	2022NBT-12724	170303	No	212	1	112	Medium-quality	Genome-fragment	78.54	HMM-based (lower-bound)	1
RGVC390	2022NBT-12727	170285	No	178	4	104	High-quality	High-quality	100	HMM-based (lower-bound)	1
RGVC391	2022NBT-12743	170111	No	277	17	55	High-quality	High-quality	99.82	HMM-based (lower-bound)	1
RGVC392	2022NBT-12745	170092	No	173	3	121	High-quality	High-quality	100	HMM-based (lower-bound)	1
RGVC393	2022NBT-1275	649876	No	568	2	388	High-quality	High-quality	100	HMM-based (lower-bound)	1
RGVC394	2022NBT-12757	169936	No	182	2	124	High-quality	High-quality	98.28	HMM-based (lower-bound)	1
RGVC395	2022NBT-12761	169920	No	148	5	88	High-quality	High-quality	98.46	HMM-based (lower-bound)	1
RGVC396	2022NBT-1278	649228	No	595	1	379	High-quality	High-quality	100	HMM-based (lower-bound)	1.01
RGVC397	2022NBT-12781_1	63816	Yes	214	4	62	Medium-quality	Genome-fragment	78.46	HMM-based (lower-bound)	1
RGVC398	2022NBT-12783	169670	No	249	29	2	Medium-quality	Genome-fragment	83.14	HMM-based (lower-bound)	1
RGVC399	2022NBT-12792_1	53902	Yes	236	13	72	Complete	High-quality	100	Provirus (high-confidence)	1
RGVC400	2022NBT-127995	11008	No	12	2	0	High-quality	High-quality	94.7	AAI-based (high-confidence)	1
RGVC401	2022NBT-128	945231	No	893	1	658	High-quality	High-quality	100	HMM-based (lower-bound)	1
RGVC402	2022NBT-1282	648246	No	595	5	364	High-quality	High-quality	100	HMM-based (lower-bound)	1
RGVC403	2022NBT-12839	169058	No	264	1	74	High-quality	High-quality	100	HMM-based (lower-bound)	1
RGVC404	2022NBT-12844	169033	No	179	5	20	High-quality	High-quality	100	HMM-based (lower-bound)	1
RGVC405	2022NBT-12848	168960	No	168	4	110	High-quality	High-quality	100	HMM-based (lower-bound)	1
RGVC406	2022NBT-12899	168439	No	160	2	59	High-quality	High-quality	98.01	HMM-based (lower-bound)	1
RGVC407	2022NBT-1292	647353	No	648	2	457	High-quality	High-quality	100	HMM-based (lower-bound)	1
RGVC408	2022NBT-12923	168149	No	162	2	81	High-quality	High-quality	98.35	HMM-based (lower-bound)	1
RGVC409	2022NBT-12928_1	35587	Yes	180	15	80	Medium-quality	Genome-fragment	55.02	HMM-based (lower-bound)	1
RGVC410	2022NBT-12945	167886	No	178	1	116	High-quality	High-quality	100	HMM-based (lower-bound)	1.01
RGVC411	2022NBT-1296	646780	No	978	5	396	High-quality	High-quality	100	HMM-based (lower-bound)	1
RGVC412	2022NBT-12972	167646	No	164	2	86	High-quality	High-quality	100	HMM-based (lower-bound)	1
RGVC413	2022NBT-12977	167600	No	191	2	74	High-quality	High-quality	100	HMM-based (lower-bound)	1
RGVC414	2022NBT-1298	645928	No	604	5	386	High-quality	High-quality	100	HMM-based (lower-bound)	1
RGVC415	2022NBT-12980	167577	No	223	36	7	High-quality	High-quality	100	AAI-based (medium-confidence)	1
RGVC416	2022NBT-12987	167534	No	197	1	69	High-quality	High-quality	100	HMM-based (lower-bound)	1
RGVC417	2022NBT-12989	167518	No	230	1	107	High-quality	High-quality	100	HMM-based (lower-bound)	1
RGVC418	2022NBT-12992	167490	No	176	2	110	High-quality	High-quality	100	HMM-based (lower-bound)	1
RGVC419	2022NBT-129957	10501	No	19	1	0	High-quality	High-quality	100	HMM-based (lower-bound)	1
RGVC420	2022NBT-13	989924	No	899	6	466	High-quality	High-quality	100	HMM-based (lower-bound)	1
RGVC421	2022NBT-130	943745	No	797	6	525	High-quality	High-quality	100	HMM-based (lower-bound)	1
RGVC422	2022NBT-1300_1	30516	Yes	664	21	353	Medium-quality	Genome-fragment	60	HMM-based (lower-bound)	1
RGVC423	2022NBT-1304	644292	No	695	6	504	High-quality	High-quality	100	HMM-based (lower-bound)	1
RGVC424	2022NBT-130422	10376	No	20	1	0	Medium-quality	Genome-fragment	78.15	AAI-based (medium-confidence)	1
RGVC425	2022NBT-13046	166976	No	208	3	101	High-quality	High-quality	97.44	HMM-based (lower-bound)	1
RGVC426	2022NBT-130892	10248	No	20	1	0	High-quality	High-quality	100	AAI-based (medium-confidence)	1
RGVC427	2022NBT-1309	643615	No	686	11	446	High-quality	High-quality	100	HMM-based (lower-bound)	1
RGVC428	2022NBT-13104	166283	No	119	4	52	High-quality	High-quality	97.85	HMM-based (lower-bound)	1
RGVC429	2022NBT-13113	166188	No	177	2	90	High-quality	High-quality	100	HMM-based (lower-bound)	1
RGVC430	2022NBT-13114	166184	No	286	1	75	High-quality	High-quality	100	HMM-based (lower-bound)	1
RGVC431	2022NBT-1312_1	54111	Yes	522	11	266	Medium-quality	Genome-fragment	71.91	HMM-based (lower-bound)	1
RGVC432	2022NBT-13126_1	48223	Yes	160	3	70	Complete	High-quality	100	Provirus (high-confidence)	1
RGVC433	2022NBT-13132	165970	No	163	2	100	Medium-quality	Genome-fragment	88.24	HMM-based (lower-bound)	1
RGVC434	2022NBT-13141	165835	No	167	2	90	High-quality	High-quality	100	HMM-based (lower-bound)	1
RGVC435	2022NBT-13142	165833	No	241	38	6	High-quality	High-quality	100	AAI-based (medium-confidence)	1
RGVC436	2022NBT-13144	165827	No	149	4	92	High-quality	High-quality	100	HMM-based (lower-bound)	1
RGVC437	2022NBT-132015	9967	No	16	0	0	High-quality	High-quality	100	AAI-based (medium-confidence)	1
RGVC438	2022NBT-13209	165154	No	183	6	100	High-quality	High-quality	99.79	HMM-based (lower-bound)	1
RGVC439	2022NBT-132348	9882	No	14	0	0	High-quality	High-quality	100	AAI-based (medium-confidence)	1
RGVC440	2022NBT-132384	9874	No	17	0	0	High-quality	High-quality	100	AAI-based (medium-confidence)	1
RGVC441	2022NBT-13240	164793	No	237	42	4	High-quality	High-quality	100	AAI-based (high-confidence)	1
RGVC442	2022NBT-132490	9848	No	14	1	0	High-quality	High-quality	100	HMM-based (lower-bound)	1
RGVC443	2022NBT-1325	639946	No	605	3	357	High-quality	High-quality	100	HMM-based (lower-bound)	1
RGVC444	2022NBT-13255	164647	No	170	4	73	High-quality	High-quality	100	HMM-based (lower-bound)	1
RGVC445	2022NBT-13298	164191	No	155	1	99	Medium-quality	Genome-fragment	69.8	HMM-based (lower-bound)	1
RGVC446	2022NBT-133	942114	No	809	2	563	High-quality	High-quality	100	HMM-based (lower-bound)	1
RGVC447	2022NBT-13309	164107	No	154	1	99	High-quality	High-quality	100	HMM-based (lower-bound)	1
RGVC448	2022NBT-1332_1	92930	Yes	665	49	311	Complete	High-quality	100	Provirus (high-confidence)	1
RGVC449	2022NBT-13323_1	69698	Yes	169	10	61	High-quality	High-quality	96.08	HMM-based (lower-bound)	1
RGVC450	2022NBT-13336	163861	No	180	3	86	High-quality	High-quality	99.86	HMM-based (lower-bound)	1
RGVC451	2022NBT-13340	163816	No	257	13	3	High-quality	High-quality	100	AAI-based (high-confidence)	1
RGVC452	2022NBT-13346_1	50949	Yes	141	27	43	Medium-quality	Genome-fragment	69.11	HMM-based (lower-bound)	1
RGVC453	2022NBT-1335	638056	No	652	5	465	High-quality	High-quality	100	HMM-based (lower-bound)	1
RGVC454	2022NBT-13355_1	40125	Yes	173	57	77	Medium-quality	Genome-fragment	57.76	HMM-based (lower-bound)	1
RGVC455	2022NBT-13367	163540	No	123	2	76	High-quality	High-quality	99.99	HMM-based (lower-bound)	1
RGVC456	2022NBT-1338	637672	No	584	3	413	High-quality	High-quality	100	HMM-based (lower-bound)	1
RGVC457	2022NBT-13403	163106	No	159	3	81	High-quality	High-quality	100	HMM-based (lower-bound)	1
RGVC458	2022NBT-13408_1	47190	Yes	245	12	58	Medium-quality	Genome-fragment	70.65	HMM-based (lower-bound)	1
RGVC459	2022NBT-13418_1	51745	Yes	171	14	58	Medium-quality	Genome-fragment	61.17	HMM-based (lower-bound)	1
RGVC460	2022NBT-1342	636522	No	621	2	380	High-quality	High-quality	100	HMM-based (lower-bound)	1
RGVC461	2022NBT-13420	162947	No	225	4	105	High-quality	High-quality	100	HMM-based (lower-bound)	1
RGVC462	2022NBT-13424_1	43593	Yes	168	8	84	Medium-quality	Genome-fragment	57.69	HMM-based (lower-bound)	1
RGVC463	2022NBT-1343	636493	No	502	5	304	High-quality	High-quality	100	HMM-based (lower-bound)	1
RGVC464	2022NBT-1344	636206	No	540	2	382	High-quality	High-quality	100	HMM-based (lower-bound)	1
RGVC465	2022NBT-13442	162710	No	241	49	4	High-quality	High-quality	100	AAI-based (medium-confidence)	1
RGVC466	2022NBT-13448	162695	No	168	5	77	Medium-quality	Genome-fragment	83.63	HMM-based (lower-bound)	1
RGVC467	2022NBT-13476	162381	No	215	1	80	High-quality	High-quality	91.74	HMM-based (lower-bound)	1
RGVC468	2022NBT-13493	162255	No	159	5	73	High-quality	High-quality	100	HMM-based (lower-bound)	1
RGVC469	2022NBT-13495	162229	No	179	6	95	High-quality	High-quality	100	HMM-based (lower-bound)	1
RGVC470	2022NBT-1350	635185	No	632	10	437	High-quality	High-quality	100	HMM-based (lower-bound)	1
RGVC471	2022NBT-135192	9234	No	16	1	0	High-quality	High-quality	100	AAI-based (medium-confidence)	1
RGVC472	2022NBT-1352	634972	No	600	4	372	High-quality	High-quality	100	HMM-based (lower-bound)	1
RGVC473	2022NBT-13523	161955	No	250	37	3	High-quality	High-quality	91.91	AAI-based (medium-confidence)	1
RGVC474	2022NBT-13529	161862	No	161	2	52	High-quality	High-quality	96.55	HMM-based (lower-bound)	1
RGVC475	2022NBT-135456	9172	No	14	0	0	High-quality	High-quality	100	AAI-based (medium-confidence)	1
RGVC476	2022NBT-13547_1	62180	Yes	170	14	100	Medium-quality	Genome-fragment	86.1	HMM-based (lower-bound)	1
RGVC477	2022NBT-1356	634293	No	944	5	460	High-quality	High-quality	100	HMM-based (lower-bound)	1
RGVC478	2022NBT-13564	161391	No	227	12	11	High-quality	High-quality	94.15	HMM-based (lower-bound)	1
RGVC479	2022NBT-1357	634204	No	716	4	413	High-quality	High-quality	100	HMM-based (lower-bound)	1
RGVC480	2022NBT-13570	161364	No	253	3	95	High-quality	High-quality	100	HMM-based (lower-bound)	1
RGVC481	2022NBT-13590	161179	No	176	4	56	High-quality	High-quality	100	AAI-based (medium-confidence)	1
RGVC482	2022NBT-136000	9053	No	24	0	0	Medium-quality	Genome-fragment	65.62	AAI-based (high-confidence)	1
RGVC483	2022NBT-136045	9041	No	9	1	1	High-quality	High-quality	100	AAI-based (medium-confidence)	1
RGVC484	2022NBT-13613_1	90675	Yes	245	16	83	High-quality	High-quality	97.09	HMM-based (lower-bound)	1
RGVC485	2022NBT-13636	160677	No	162	4	54	Medium-quality	Genome-fragment	88.3	HMM-based (lower-bound)	1
RGVC486	2022NBT-1364	632988	No	538	6	338	High-quality	High-quality	100	HMM-based (lower-bound)	1
RGVC487	2022NBT-13640	160634	No	214	2	88	High-quality	High-quality	100	HMM-based (lower-bound)	1
RGVC488	2022NBT-136434	8952	No	14	0	0	High-quality	High-quality	100	AAI-based (high-confidence)	1
RGVC489	2022NBT-13647	160552	No	301	1	62	High-quality	High-quality	100	HMM-based (lower-bound)	1
RGVC490	2022NBT-136485	8940	No	18	1	1	High-quality	High-quality	100	HMM-based (lower-bound)	1
RGVC491	2022NBT-1365	632721	No	501	2	302	High-quality	High-quality	100	HMM-based (lower-bound)	1
RGVC492	2022NBT-13667	160309	No	164	1	86	High-quality	High-quality	100	HMM-based (lower-bound)	1
RGVC493	2022NBT-13671	160279	No	130	4	80	High-quality	High-quality	100	HMM-based (lower-bound)	1
RGVC494	2022NBT-13675	160260	No	216	30	35	High-quality	High-quality	100	AAI-based (medium-confidence)	1
RGVC495	2022NBT-1368	632022	No	647	1	389	High-quality	High-quality	100	HMM-based (lower-bound)	1
RGVC496	2022NBT-13683_1	42728	Yes	182	20	66	Medium-quality	Genome-fragment	74.51	HMM-based (lower-bound)	1
RGVC497	2022NBT-13693	160140	No	132	3	87	High-quality	High-quality	100	HMM-based (lower-bound)	1
RGVC498	2022NBT-13721	159913	No	281	39	3	Complete	High-quality	100	DTR (medium-confidence)	1
RGVC499	2022NBT-1373	631343	No	584	6	405	High-quality	High-quality	100	HMM-based (lower-bound)	1
RGVC500	2022NBT-1375_2	33667	Yes	51	18	0	Medium-quality	Genome-fragment	83.27	AAI-based (medium-confidence)	1
RGVC501	2022NBT-13755	159706	No	185	3	92	High-quality	High-quality	100	HMM-based (lower-bound)	1
RGVC502	2022NBT-13760	159647	No	280	2	100	High-quality	High-quality	100	HMM-based (lower-bound)	1
RGVC503	2022NBT-13766_1	54780	Yes	181	27	87	Complete	High-quality	100	Provirus (high-confidence)	1
RGVC504	2022NBT-1377	630611	No	449	2	249	High-quality	High-quality	100	HMM-based (lower-bound)	1
RGVC505	2022NBT-13783	159456	No	277	38	1	High-quality	High-quality	90.85	AAI-based (high-confidence)	1
RGVC506	2022NBT-1379	630217	No	663	9	334	High-quality	High-quality	100	HMM-based (lower-bound)	1
RGVC507	2022NBT-13802	159264	No	152	2	94	High-quality	High-quality	95.55	HMM-based (lower-bound)	1
RGVC508	2022NBT-13807_1	37965	Yes	151	19	84	Medium-quality	Genome-fragment	82.03	AAI-based (high-confidence)	1
RGVC509	2022NBT-13808	159219	No	187	2	88	High-quality	High-quality	100	HMM-based (lower-bound)	1.08
RGVC510	2022NBT-1382_1	36848	Yes	611	21	381	Medium-quality	Genome-fragment	61.56	HMM-based (lower-bound)	1
RGVC511	2022NBT-1384	628781	No	587	2	399	Medium-quality	Genome-fragment	52.69	HMM-based (lower-bound)	1
RGVC512	2022NBT-13844	158827	No	210	13	13	High-quality	High-quality	98.35	HMM-based (lower-bound)	1
RGVC513	2022NBT-1385	628667	No	581	5	362	High-quality	High-quality	100	HMM-based (lower-bound)	1
RGVC514	2022NBT-13866	158647	No	135	4	65	High-quality	High-quality	100	HMM-based (lower-bound)	1
RGVC515	2022NBT-13868	158639	No	152	4	107	High-quality	High-quality	100	HMM-based (lower-bound)	1
RGVC516	2022NBT-1390	626813	No	608	2	336	High-quality	High-quality	100	HMM-based (lower-bound)	1
RGVC517	2022NBT-139054	8375	No	12	1	8	High-quality	High-quality	100	HMM-based (lower-bound)	1
RGVC518	2022NBT-13925	158087	No	249	41	14	Medium-quality	Genome-fragment	87.36	AAI-based (high-confidence)	1
RGVC519	2022NBT-13927	158073	No	226	22	2	High-quality	High-quality	92.19	AAI-based (medium-confidence)	1
RGVC520	2022NBT-139282	8328	No	10	1	0	Medium-quality	Genome-fragment	53.77	AAI-based (high-confidence)	1
RGVC521	2022NBT-1393	626341	No	587	7	355	High-quality	High-quality	100	HMM-based (lower-bound)	1
RGVC522	2022NBT-13931	158052	No	191	19	0	High-quality	High-quality	96.95	AAI-based (high-confidence)	1
RGVC523	2022NBT-13953	157899	No	185	15	3	High-quality	High-quality	93.23	HMM-based (lower-bound)	1
RGVC524	2022NBT-1396	626161	No	582	1	401	Medium-quality	Genome-fragment	52.49	HMM-based (lower-bound)	1
RGVC525	2022NBT-139702	8240	No	11	1	0	High-quality	High-quality	100	HMM-based (lower-bound)	1
RGVC526	2022NBT-14	989803	No	1032	9	559	High-quality	High-quality	100	HMM-based (lower-bound)	1
RGVC527	2022NBT-14002	157454	No	157	3	89	Medium-quality	Genome-fragment	88.01	HMM-based (lower-bound)	1
RGVC528	2022NBT-14009_1	133350	Yes	241	29	22	Complete	High-quality	100	Provirus (medium-confidence)	1
RGVC529	2022NBT-14014	157298	No	148	4	63	High-quality	High-quality	98.96	HMM-based (lower-bound)	1
RGVC530	2022NBT-1403	625486	No	612	4	337	High-quality	High-quality	100	HMM-based (lower-bound)	1
RGVC531	2022NBT-14036_1	43920	Yes	198	6	81	Complete	High-quality	100	Provirus (high-confidence)	1
RGVC532	2022NBT-14039	157089	No	132	5	82	High-quality	High-quality	97.85	HMM-based (lower-bound)	1
RGVC533	2022NBT-1404	625311	No	608	1	322	High-quality	High-quality	100	HMM-based (lower-bound)	1.01
RGVC534	2022NBT-14044_1	52865	Yes	248	14	68	Medium-quality	Genome-fragment	68.13	HMM-based (lower-bound)	1
RGVC535	2022NBT-1405	624999	No	581	4	373	High-quality	High-quality	100	HMM-based (lower-bound)	1
RGVC536	2022NBT-14067	156823	No	227	1	70	High-quality	High-quality	100	HMM-based (lower-bound)	1
RGVC537	2022NBT-14074_1	34819	Yes	184	30	83	Medium-quality	Genome-fragment	57.85	HMM-based (lower-bound)	1
RGVC538	2022NBT-140830	8025	No	17	1	0	High-quality	High-quality	100	AAI-based (medium-confidence)	1
RGVC539	2022NBT-141	938744	No	797	6	483	Medium-quality	Genome-fragment	82.5	HMM-based (lower-bound)	1
RGVC540	2022NBT-14100_1	48456	Yes	265	15	75	Medium-quality	Genome-fragment	63.19	HMM-based (lower-bound)	1
RGVC541	2022NBT-141140	7972	No	8	0	0	High-quality	High-quality	100	AAI-based (medium-confidence)	3.85
RGVC542	2022NBT-14118_1	51685	Yes	64	14	2	High-quality	High-quality	100	AAI-based (medium-confidence)	1
RGVC543	2022NBT-14118_2	44665	Yes	56	26	0	High-quality	High-quality	97.17	AAI-based (medium-confidence)	1
RGVC544	2022NBT-14124	156251	No	132	2	99	High-quality	High-quality	100	HMM-based (lower-bound)	1
RGVC545	2022NBT-14127_1	48309	Yes	281	16	75	Medium-quality	Genome-fragment	68.09	HMM-based (lower-bound)	1
RGVC546	2022NBT-1413	623498	No	551	3	339	High-quality	High-quality	100	HMM-based (lower-bound)	1
RGVC547	2022NBT-14138	156139	No	146	1	50	High-quality	High-quality	100	HMM-based (lower-bound)	1
RGVC548	2022NBT-14139_1	130519	Yes	168	38	16	High-quality	High-quality	100	AAI-based (high-confidence)	1
RGVC549	2022NBT-141522	7905	No	12	5	0	Medium-quality	Genome-fragment	67.29	AAI-based (medium-confidence)	1
RGVC550	2022NBT-1416	622653	No	575	5	384	High-quality	High-quality	100	HMM-based (lower-bound)	1
RGVC551	2022NBT-14169_1	149108	Yes	184	29	23	High-quality	High-quality	100	AAI-based (medium-confidence)	1
RGVC552	2022NBT-14183	155773	No	197	2	103	High-quality	High-quality	100	HMM-based (lower-bound)	1
RGVC553	2022NBT-14204	155530	No	157	1	94	High-quality	High-quality	100	HMM-based (lower-bound)	1
RGVC554	2022NBT-14229	155311	No	149	2	100	High-quality	High-quality	100	HMM-based (lower-bound)	1
RGVC555	2022NBT-14235_1	32433	Yes	174	17	52	Medium-quality	Genome-fragment	52.2	HMM-based (lower-bound)	1
RGVC556	2022NBT-14244	155172	No	109	1	49	High-quality	High-quality	100	HMM-based (lower-bound)	1
RGVC557	2022NBT-1425	620882	No	701	3	377	High-quality	High-quality	100	HMM-based (lower-bound)	1
RGVC558	2022NBT-14262_1	34605	Yes	144	36	68	Medium-quality	Genome-fragment	74.66	HMM-based (lower-bound)	1
RGVC559	2022NBT-14263_1	46701	Yes	180	9	94	Complete	High-quality	100	Provirus (high-confidence)	1
RGVC560	2022NBT-14268	154994	No	185	38	7	High-quality	High-quality	99.2	AAI-based (medium-confidence)	1
RGVC561	2022NBT-142929	7635	No	13	1	0	Medium-quality	Genome-fragment	59.41	AAI-based (high-confidence)	1
RGVC562	2022NBT-143009	7618	No	11	0	0	High-quality	High-quality	100	AAI-based (medium-confidence)	1
RGVC563	2022NBT-14305	154667	No	159	5	69	Medium-quality	Genome-fragment	65.21	HMM-based (lower-bound)	1
RGVC564	2022NBT-1431	619858	No	524	2	312	High-quality	High-quality	100	HMM-based (lower-bound)	1
RGVC565	2022NBT-14314	154614	No	213	3	72	High-quality	High-quality	93.86	HMM-based (lower-bound)	1
RGVC566	2022NBT-143185	7584	No	20	0	0	High-quality	High-quality	100	AAI-based (medium-confidence)	1
RGVC567	2022NBT-14328	154424	No	184	1	51	High-quality	High-quality	100	HMM-based (lower-bound)	1
RGVC568	2022NBT-14330	154412	No	152	3	71	High-quality	High-quality	92.64	HMM-based (lower-bound)	1.03
RGVC569	2022NBT-1434	619508	No	704	6	289	High-quality	High-quality	100	HMM-based (lower-bound)	1
RGVC570	2022NBT-14343	154254	No	147	1	92	High-quality	High-quality	100	HMM-based (lower-bound)	1
RGVC571	2022NBT-14380	153906	No	144	2	65	High-quality	High-quality	99.49	HMM-based (lower-bound)	1
RGVC572	2022NBT-14396	153752	No	263	19	43	High-quality	High-quality	99.74	HMM-based (lower-bound)	1
RGVC573	2022NBT-14419	153570	No	234	36	7	Medium-quality	Genome-fragment	89.93	AAI-based (medium-confidence)	1
RGVC574	2022NBT-14430	153480	No	197	7	85	High-quality	High-quality	99.93	HMM-based (lower-bound)	1
RGVC575	2022NBT-14445	153317	No	163	1	86	Medium-quality	Genome-fragment	82.07	HMM-based (lower-bound)	1
RGVC576	2022NBT-14455	153256	No	247	1	56	High-quality	High-quality	100	HMM-based (lower-bound)	1
RGVC577	2022NBT-1446_1	41725	Yes	687	9	390	Medium-quality	Genome-fragment	61.79	HMM-based (lower-bound)	1
RGVC578	2022NBT-14463_1	41416	Yes	217	17	65	Medium-quality	Genome-fragment	68.05	HMM-based (lower-bound)	1
RGVC579	2022NBT-1447	617339	No	643	5	355	High-quality	High-quality	100	HMM-based (lower-bound)	1
RGVC580	2022NBT-144765	7281	No	11	1	0	Medium-quality	Genome-fragment	56.37	AAI-based (medium-confidence)	1
RGVC581	2022NBT-14510	152762	No	178	1	116	High-quality	High-quality	100	HMM-based (lower-bound)	1
RGVC582	2022NBT-1452	616056	No	987	1	369	High-quality	High-quality	100	HMM-based (lower-bound)	1
RGVC583	2022NBT-14521	152709	No	293	2	58	High-quality	High-quality	100	HMM-based (lower-bound)	1
RGVC584	2022NBT-14529	152664	No	215	44	4	Complete	High-quality	100	DTR (high-confidence)	1
RGVC585	2022NBT-1453	616011	No	610	2	340	High-quality	High-quality	100	HMM-based (lower-bound)	1
RGVC586	2022NBT-14536	152631	No	142	2	74	High-quality	High-quality	100	HMM-based (lower-bound)	1
RGVC587	2022NBT-14539	152582	No	173	2	102	Medium-quality	Genome-fragment	79.44	HMM-based (lower-bound)	1
RGVC588	2022NBT-14547	152532	No	181	1	111	High-quality	High-quality	100	HMM-based (lower-bound)	1
RGVC589	2022NBT-14552	152485	No	222	4	90	High-quality	High-quality	100	HMM-based (lower-bound)	1
RGVC590	2022NBT-14564	152404	No	145	2	94	Medium-quality	Genome-fragment	87.44	HMM-based (lower-bound)	1
RGVC591	2022NBT-1459_1	40985	Yes	585	22	350	Medium-quality	Genome-fragment	62.44	HMM-based (lower-bound)	1
RGVC592	2022NBT-14590	152077	No	180	2	68	High-quality	High-quality	100	HMM-based (lower-bound)	1
RGVC593	2022NBT-14602	151992	No	224	35	2	High-quality	High-quality	95.08	AAI-based (high-confidence)	1
RGVC594	2022NBT-14611	151937	No	227	2	94	High-quality	High-quality	100	HMM-based (lower-bound)	1
RGVC595	2022NBT-1462	615103	No	592	9	404	High-quality	High-quality	100	HMM-based (lower-bound)	1
RGVC596	2022NBT-14639_1	39454	Yes	165	15	70	Complete	High-quality	100	Provirus (high-confidence)	1
RGVC597	2022NBT-14641	151658	No	138	3	92	High-quality	High-quality	100	HMM-based (lower-bound)	1
RGVC598	2022NBT-1465	614643	No	588	7	389	High-quality	High-quality	100	HMM-based (lower-bound)	1
RGVC599	2022NBT-1466	614575	No	507	4	351	High-quality	High-quality	100	HMM-based (lower-bound)	1
RGVC600	2022NBT-14667	151439	No	161	2	69	Medium-quality	Genome-fragment	55.84	HMM-based (lower-bound)	1
RGVC601	2022NBT-14678	151343	No	162	10	76	High-quality	High-quality	100	HMM-based (lower-bound)	1.12
RGVC602	2022NBT-1468	614011	No	523	1	359	High-quality	High-quality	100	HMM-based (lower-bound)	1
RGVC603	2022NBT-1469	613920	No	508	3	296	High-quality	High-quality	100	HMM-based (lower-bound)	1
RGVC604	2022NBT-147	936429	No	840	5	623	High-quality	High-quality	100	HMM-based (lower-bound)	1
RGVC605	2022NBT-14724	150906	No	148	3	82	High-quality	High-quality	95.22	HMM-based (lower-bound)	1
RGVC606	2022NBT-14730	150837	No	168	3	41	Medium-quality	Genome-fragment	83.4	HMM-based (lower-bound)	1
RGVC607	2022NBT-14738_1	35359	Yes	132	17	53	Medium-quality	Genome-fragment	51.21	HMM-based (lower-bound)	1
RGVC608	2022NBT-1474	613659	No	541	7	306	High-quality	High-quality	100	HMM-based (lower-bound)	1
RGVC609	2022NBT-14746	150643	No	150	1	101	High-quality	High-quality	100	HMM-based (lower-bound)	1.01
RGVC610	2022NBT-1476	613154	No	946	1	518	High-quality	High-quality	100	HMM-based (lower-bound)	1
RGVC611	2022NBT-14784_1	134765	Yes	184	49	13	Complete	High-quality	100	Provirus (high-confidence)	1
RGVC612	2022NBT-14796	150180	No	191	1	86	High-quality	High-quality	100	HMM-based (lower-bound)	1
RGVC613	2022NBT-14799	150129	No	134	3	87	Medium-quality	Genome-fragment	85.97	HMM-based (lower-bound)	1
RGVC614	2022NBT-148	935313	No	844	6	467	High-quality	High-quality	100	HMM-based (lower-bound)	1
RGVC615	2022NBT-1481	612835	No	478	3	302	High-quality	High-quality	100	HMM-based (lower-bound)	1
RGVC616	2022NBT-14812	150035	No	194	40	5	High-quality	High-quality	97.73	AAI-based (medium-confidence)	1
RGVC617	2022NBT-14815_1	39787	Yes	186	18	86	Complete	High-quality	100	Provirus (high-confidence)	1
RGVC618	2022NBT-14831	149845	No	156	8	68	High-quality	High-quality	90.57	HMM-based (lower-bound)	1
RGVC619	2022NBT-14849	149649	No	187	40	6	Complete	High-quality	100	DTR (high-confidence)	1
RGVC620	2022NBT-14852	149608	No	166	5	58	High-quality	High-quality	94.71	HMM-based (lower-bound)	1
RGVC621	2022NBT-14895	149309	No	181	3	101	High-quality	High-quality	100	HMM-based (lower-bound)	1
RGVC622	2022NBT-149	935141	No	828	5	598	High-quality	High-quality	100	HMM-based (lower-bound)	1
RGVC623	2022NBT-14905	149161	No	276	3	52	High-quality	High-quality	98.35	HMM-based (lower-bound)	1
RGVC624	2022NBT-14906	149155	No	251	28	0	Medium-quality	Genome-fragment	79.74	AAI-based (high-confidence)	1
RGVC625	2022NBT-14909	149121	No	146	3	39	High-quality	High-quality	94.69	HMM-based (lower-bound)	1
RGVC626	2022NBT-1493	611477	No	689	5	354	Medium-quality	Genome-fragment	57.63	HMM-based (lower-bound)	1
RGVC627	2022NBT-14941_1	35196	Yes	204	17	60	Medium-quality	Genome-fragment	63.73	HMM-based (lower-bound)	1
RGVC628	2022NBT-149510	6444	No	8	1	0	High-quality	High-quality	100	HMM-based (lower-bound)	1
RGVC629	2022NBT-14967	148551	No	147	1	90	Medium-quality	Genome-fragment	82.89	HMM-based (lower-bound)	1
RGVC630	2022NBT-14971	148517	No	165	5	69	Medium-quality	Genome-fragment	87.15	HMM-based (lower-bound)	1
RGVC631	2022NBT-1498	611207	No	570	4	355	High-quality	High-quality	100	HMM-based (lower-bound)	1
RGVC632	2022NBT-1499	611052	No	563	8	347	High-quality	High-quality	100	HMM-based (lower-bound)	1
RGVC633	2022NBT-15	989495	No	831	3	546	High-quality	High-quality	100	HMM-based (lower-bound)	1
RGVC634	2022NBT-150	934833	No	1112	7	746	High-quality	High-quality	100	HMM-based (lower-bound)	1
RGVC635	2022NBT-1500	610781	No	623	2	290	High-quality	High-quality	100	HMM-based (lower-bound)	1
RGVC636	2022NBT-15003	148237	No	140	3	101	High-quality	High-quality	100	HMM-based (lower-bound)	1
RGVC637	2022NBT-15029	148026	No	149	1	95	High-quality	High-quality	100	HMM-based (lower-bound)	1
RGVC638	2022NBT-15055	147808	No	142	2	97	High-quality	High-quality	95.65	HMM-based (lower-bound)	1
RGVC639	2022NBT-15077	147627	No	235	3	87	High-quality	High-quality	100	HMM-based (lower-bound)	1
RGVC640	2022NBT-15086	147528	No	157	2	101	High-quality	High-quality	99.43	HMM-based (lower-bound)	1
RGVC641	2022NBT-15089	147502	No	212	52	1	High-quality	High-quality	100	AAI-based (medium-confidence)	1
RGVC642	2022NBT-15092	147448	No	221	35	3	High-quality	High-quality	96.43	AAI-based (medium-confidence)	1
RGVC643	2022NBT-15095_1	61693	Yes	140	17	36	Medium-quality	Genome-fragment	73.43	HMM-based (lower-bound)	1
RGVC644	2022NBT-151	934519	No	854	11	505	High-quality	High-quality	100	HMM-based (lower-bound)	1
RGVC645	2022NBT-1511_1	52046	Yes	418	4	229	Complete	High-quality	100	Provirus (medium-confidence)	1
RGVC646	2022NBT-1512	608286	No	751	12	284	High-quality	High-quality	100	HMM-based (lower-bound)	1
RGVC647	2022NBT-1513	608190	No	555	1	407	High-quality	High-quality	100	HMM-based (lower-bound)	1
RGVC648	2022NBT-15144_1	89576	Yes	255	20	43	High-quality	High-quality	100	AAI-based (high-confidence)	1
RGVC649	2022NBT-15149	146985	No	208	2	103	High-quality	High-quality	98.97	HMM-based (lower-bound)	1
RGVC650	2022NBT-15157_1	28506	Yes	160	23	85	Medium-quality	Genome-fragment	50.72	HMM-based (lower-bound)	1
RGVC651	2022NBT-1516	607883	No	456	1	251	High-quality	High-quality	100	HMM-based (lower-bound)	1
RGVC652	2022NBT-15172	146784	No	140	2	79	High-quality	High-quality	100	HMM-based (lower-bound)	1
RGVC653	2022NBT-151772	6094	No	5	1	0	High-quality	High-quality	100	HMM-based (lower-bound)	1
RGVC654	2022NBT-1518	607526	No	570	2	407	High-quality	High-quality	100	HMM-based (lower-bound)	1
RGVC655	2022NBT-15181	146723	No	144	5	53	High-quality	High-quality	98.31	HMM-based (lower-bound)	1
RGVC656	2022NBT-15184	146692	No	266	7	33	High-quality	High-quality	98.86	HMM-based (lower-bound)	1
RGVC657	2022NBT-15187	146667	No	294	1	63	High-quality	High-quality	100	HMM-based (lower-bound)	1
RGVC658	2022NBT-15192	146594	No	243	2	88	High-quality	High-quality	100	HMM-based (lower-bound)	1
RGVC659	2022NBT-15196_1	53929	Yes	91	22	0	High-quality	High-quality	100	AAI-based (high-confidence)	1
RGVC660	2022NBT-15198	146559	No	156	3	62	Medium-quality	Genome-fragment	73.57	HMM-based (lower-bound)	1
RGVC661	2022NBT-152	934133	No	974	6	606	High-quality	High-quality	100	HMM-based (lower-bound)	1
RGVC662	2022NBT-15209_1	44058	Yes	185	11	61	Medium-quality	Genome-fragment	55.38	HMM-based (lower-bound)	1
RGVC663	2022NBT-15224	146314	No	144	11	78	High-quality	High-quality	99.03	HMM-based (lower-bound)	1
RGVC664	2022NBT-15227	146259	No	192	1	100	High-quality	High-quality	100	HMM-based (lower-bound)	1
RGVC665	2022NBT-15228	146259	No	207	15	2	High-quality	High-quality	100	AAI-based (high-confidence)	1
RGVC666	2022NBT-15236_1	127821	Yes	220	44	17	Complete	High-quality	100	Provirus (high-confidence)	1
RGVC667	2022NBT-15248	146123	No	244	34	3	High-quality	High-quality	100	AAI-based (high-confidence)	1
RGVC668	2022NBT-15260_1	66561	Yes	161	8	42	Medium-quality	Genome-fragment	82.85	HMM-based (lower-bound)	1
RGVC669	2022NBT-1528	606692	No	590	4	293	High-quality	High-quality	100	HMM-based (lower-bound)	1
RGVC670	2022NBT-1529	606369	No	565	4	311	High-quality	High-quality	100	HMM-based (lower-bound)	1
RGVC671	2022NBT-15293	145692	No	153	8	79	High-quality	High-quality	99.25	HMM-based (lower-bound)	1
RGVC672	2022NBT-153_1	33502	Yes	1184	23	620	Medium-quality	Genome-fragment	54.49	HMM-based (lower-bound)	1
RGVC673	2022NBT-1531_1	33533	Yes	623	16	339	Medium-quality	Genome-fragment	59.32	HMM-based (lower-bound)	1
RGVC674	2022NBT-15321	145477	No	207	2	66	High-quality	High-quality	99.33	HMM-based (lower-bound)	1
RGVC675	2022NBT-15340_1	36320	Yes	258	22	64	Complete	High-quality	100	Provirus (medium-confidence)	1
RGVC676	2022NBT-15366	145103	No	251	6	29	High-quality	High-quality	100	HMM-based (lower-bound)	1
RGVC677	2022NBT-15394	144955	No	187	42	5	High-quality	High-quality	93	AAI-based (medium-confidence)	1
RGVC678	2022NBT-154	933941	No	909	2	594	High-quality	High-quality	100	HMM-based (lower-bound)	1
RGVC679	2022NBT-1540	605473	No	629	4	360	High-quality	High-quality	94.8	HMM-based (lower-bound)	1
RGVC680	2022NBT-15406_1	42119	Yes	173	19	72	Complete	High-quality	100	Provirus (high-confidence)	1
RGVC681	2022NBT-15412_2	46788	Yes	66	25	3	High-quality	High-quality	100	AAI-based (high-confidence)	1
RGVC682	2022NBT-15413	144866	No	167	7	73	High-quality	High-quality	97.48	HMM-based (lower-bound)	1
RGVC683	2022NBT-15415	144861	No	192	24	21	High-quality	High-quality	99.18	HMM-based (lower-bound)	1
RGVC684	2022NBT-1542	604990	No	591	7	361	High-quality	High-quality	100	HMM-based (lower-bound)	1
RGVC685	2022NBT-15423	144818	No	136	1	82	High-quality	High-quality	100	HMM-based (lower-bound)	1
RGVC686	2022NBT-15429_1	87146	Yes	131	4	40	Medium-quality	Genome-fragment	88.77	HMM-based (lower-bound)	1
RGVC687	2022NBT-15447	144672	No	228	5	47	High-quality	High-quality	99.04	HMM-based (lower-bound)	1
RGVC688	2022NBT-15453	144632	No	155	1	74	High-quality	High-quality	100	HMM-based (lower-bound)	1
RGVC689	2022NBT-15457	144622	No	192	1	99	High-quality	High-quality	100	HMM-based (lower-bound)	1
RGVC690	2022NBT-15462_1	45992	Yes	143	9	50	Medium-quality	Genome-fragment	58	HMM-based (lower-bound)	1
RGVC691	2022NBT-154697	5660	No	11	0	0	High-quality	High-quality	100	AAI-based (medium-confidence)	1
RGVC692	2022NBT-1547	604203	No	565	3	346	High-quality	High-quality	100	HMM-based (lower-bound)	1
RGVC693	2022NBT-15476	144462	No	151	2	73	High-quality	High-quality	100	HMM-based (lower-bound)	1
RGVC694	2022NBT-154770	5650	No	7	0	0	High-quality	High-quality	99.94	AAI-based (medium-confidence)	1.1
RGVC695	2022NBT-154948	5626	No	12	0	0	High-quality	High-quality	98.7	AAI-based (medium-confidence)	1
RGVC696	2022NBT-15495	144321	No	204	3	41	Medium-quality	Genome-fragment	78.95	HMM-based (lower-bound)	1
RGVC697	2022NBT-15500_1	46604	Yes	197	16	50	Medium-quality	Genome-fragment	76.82	HMM-based (lower-bound)	1
RGVC698	2022NBT-155221	5593	No	10	0	0	High-quality	High-quality	95.64	AAI-based (medium-confidence)	1
RGVC699	2022NBT-15523_1	40609	Yes	144	16	60	Medium-quality	Genome-fragment	50.05	HMM-based (lower-bound)	1
RGVC700	2022NBT-15526	144097	No	176	2	74	Medium-quality	Genome-fragment	84.37	HMM-based (lower-bound)	1
RGVC701	2022NBT-15555_1	31431	Yes	195	20	83	Medium-quality	Genome-fragment	53.5	HMM-based (lower-bound)	1
RGVC702	2022NBT-1556_1	68186	Yes	525	11	271	High-quality	High-quality	91.82	HMM-based (lower-bound)	1
RGVC703	2022NBT-155747	5515	No	11	1	0	High-quality	High-quality	100	HMM-based (lower-bound)	1
RGVC704	2022NBT-1558	602568	No	560	8	335	High-quality	High-quality	100	HMM-based (lower-bound)	1
RGVC705	2022NBT-15592	143576	No	249	6	88	High-quality	High-quality	96.44	HMM-based (lower-bound)	1
RGVC706	2022NBT-15593	143567	No	167	38	5	High-quality	High-quality	92.33	AAI-based (medium-confidence)	1
RGVC707	2022NBT-156_1	37038	Yes	939	28	545	Medium-quality	Genome-fragment	67.83	HMM-based (lower-bound)	1
RGVC708	2022NBT-1563	601921	No	550	1	264	High-quality	High-quality	100	HMM-based (lower-bound)	1
RGVC709	2022NBT-156353	5437	No	10	7	0	High-quality	High-quality	100	AAI-based (medium-confidence)	1
RGVC710	2022NBT-15644	143262	No	159	33	3	High-quality	High-quality	100	AAI-based (medium-confidence)	1
RGVC711	2022NBT-15657	143151	No	118	3	72	High-quality	High-quality	93.04	HMM-based (lower-bound)	1
RGVC712	2022NBT-15662	143108	No	209	3	0	Medium-quality	Genome-fragment	73.99	HMM-based (lower-bound)	1
RGVC713	2022NBT-15687_1	72844	Yes	130	25	35	Complete	High-quality	100	Provirus (high-confidence)	1
RGVC714	2022NBT-1571	601086	No	617	1	433	High-quality	High-quality	100	HMM-based (lower-bound)	1
RGVC715	2022NBT-1572	601027	No	884	2	499	High-quality	High-quality	100	HMM-based (lower-bound)	1
RGVC716	2022NBT-15723	142541	No	145	2	105	High-quality	High-quality	100	HMM-based (lower-bound)	1
RGVC717	2022NBT-1573_1	48353	Yes	593	24	348	Medium-quality	Genome-fragment	73.67	HMM-based (lower-bound)	1
RGVC718	2022NBT-15732	142456	No	145	4	61	High-quality	High-quality	93.19	HMM-based (lower-bound)	1
RGVC719	2022NBT-15733	142455	No	147	5	58	High-quality	High-quality	100	HMM-based (lower-bound)	1
RGVC720	2022NBT-1574_1	38736	Yes	555	13	356	Medium-quality	Genome-fragment	63.39	HMM-based (lower-bound)	1
RGVC721	2022NBT-15744	142357	No	157	5	97	High-quality	High-quality	100	HMM-based (lower-bound)	1
RGVC722	2022NBT-15747	142331	No	208	7	85	High-quality	High-quality	98.44	HMM-based (lower-bound)	1
RGVC723	2022NBT-15767_1	30860	Yes	135	36	69	Medium-quality	Genome-fragment	65.35	HMM-based (lower-bound)	1
RGVC724	2022NBT-15768	142127	No	151	2	58	High-quality	High-quality	100	HMM-based (lower-bound)	1
RGVC725	2022NBT-1577	600129	No	885	4	491	High-quality	High-quality	100	HMM-based (lower-bound)	1
RGVC726	2022NBT-15770	142121	No	179	13	85	High-quality	High-quality	98.8	HMM-based (lower-bound)	1
RGVC727	2022NBT-15774	142085	No	190	39	3	Complete	High-quality	100	DTR (high-confidence)	1
RGVC728	2022NBT-1578_1	44536	Yes	586	6	361	Medium-quality	Genome-fragment	69.37	HMM-based (lower-bound)	1
RGVC729	2022NBT-1579	599896	No	648	6	382	High-quality	High-quality	100	HMM-based (lower-bound)	1
RGVC730	2022NBT-15812	141726	No	136	2	53	High-quality	High-quality	98.48	HMM-based (lower-bound)	1
RGVC731	2022NBT-15816	141695	No	147	5	97	Medium-quality	Genome-fragment	80.69	HMM-based (lower-bound)	1
RGVC732	2022NBT-1584	599370	No	590	2	268	High-quality	High-quality	100	HMM-based (lower-bound)	1
RGVC733	2022NBT-15855	141396	No	172	1	100	High-quality	High-quality	100	HMM-based (lower-bound)	1
RGVC734	2022NBT-15860	141374	No	230	1	103	High-quality	High-quality	100	HMM-based (lower-bound)	1
RGVC735	2022NBT-15888	141169	No	159	2	72	Medium-quality	Genome-fragment	85.58	HMM-based (lower-bound)	1
RGVC736	2022NBT-1589	598527	No	536	4	335	High-quality	High-quality	100	HMM-based (lower-bound)	1
RGVC737	2022NBT-15910_1	124792	Yes	170	11	24	Medium-quality	Genome-fragment	88.01	HMM-based (lower-bound)	1
RGVC738	2022NBT-15911	140995	No	149	2	86	High-quality	High-quality	100	HMM-based (lower-bound)	1
RGVC739	2022NBT-15913	140989	No	152	2	75	High-quality	High-quality	91.38	HMM-based (lower-bound)	1
RGVC740	2022NBT-1593	598253	No	722	4	398	High-quality	High-quality	100	HMM-based (lower-bound)	1
RGVC741	2022NBT-15934	140753	No	131	2	98	High-quality	High-quality	97.99	HMM-based (lower-bound)	1
RGVC742	2022NBT-1594	598234	No	555	1	318	High-quality	High-quality	100	HMM-based (lower-bound)	1
RGVC743	2022NBT-15951	140670	No	219	5	77	High-quality	High-quality	93.43	HMM-based (lower-bound)	1
RGVC744	2022NBT-15953	140659	No	136	4	51	Medium-quality	Genome-fragment	89.45	HMM-based (lower-bound)	1
RGVC745	2022NBT-15955	140639	No	164	6	82	High-quality	High-quality	100	HMM-based (lower-bound)	1
RGVC746	2022NBT-15959	140550	No	198	2	34	High-quality	High-quality	100	HMM-based (lower-bound)	1
RGVC747	2022NBT-1597	597244	No	789	6	493	High-quality	High-quality	100	HMM-based (lower-bound)	1
RGVC748	2022NBT-15977	140401	No	170	3	82	High-quality	High-quality	100	HMM-based (lower-bound)	1
RGVC749	2022NBT-15986_1	83112	Yes	187	15	53	High-quality	High-quality	100	AAI-based (medium-confidence)	1
RGVC750	2022NBT-1601	595460	No	570	7	223	High-quality	High-quality	100	HMM-based (lower-bound)	1
RGVC751	2022NBT-1602	595456	No	589	4	391	High-quality	High-quality	100	HMM-based (lower-bound)	1
RGVC752	2022NBT-16026	140039	No	130	1	84	High-quality	High-quality	100	HMM-based (lower-bound)	1
RGVC753	2022NBT-16047	139934	No	217	30	2	Complete	High-quality	100	DTR (high-confidence)	1
RGVC754	2022NBT-16055	139897	No	189	48	3	High-quality	High-quality	100	AAI-based (high-confidence)	1
RGVC755	2022NBT-16058_1	42363	Yes	138	37	75	Complete	High-quality	100	Provirus (high-confidence)	1
RGVC756	2022NBT-1606	594986	No	489	4	329	High-quality	High-quality	100	HMM-based (lower-bound)	1
RGVC757	2022NBT-16064_1	36767	Yes	255	7	41	Medium-quality	Genome-fragment	64.89	HMM-based (lower-bound)	1
RGVC758	2022NBT-1607	594943	No	591	1	331	High-quality	High-quality	100	HMM-based (lower-bound)	1
RGVC759	2022NBT-1609	594831	No	573	5	319	High-quality	High-quality	100	HMM-based (lower-bound)	1
RGVC760	2022NBT-161	930316	No	888	3	615	High-quality	High-quality	100	HMM-based (lower-bound)	1
RGVC761	2022NBT-16100	139461	No	199	37	2	High-quality	High-quality	100	AAI-based (high-confidence)	1
RGVC762	2022NBT-16120_1	41266	Yes	172	13	83	Medium-quality	Genome-fragment	52.8	HMM-based (lower-bound)	1
RGVC763	2022NBT-1613	594406	No	620	3	416	High-quality	High-quality	100	HMM-based (lower-bound)	1
RGVC764	2022NBT-16137	139188	No	155	42	4	High-quality	High-quality	90.16	AAI-based (medium-confidence)	1
RGVC765	2022NBT-162	929908	No	1174	4	555	High-quality	High-quality	100	HMM-based (lower-bound)	1
RGVC766	2022NBT-16200_1	33039	Yes	218	18	50	High-quality	High-quality	100	AAI-based (high-confidence)	1
RGVC767	2022NBT-16206	138651	No	218	2	70	High-quality	High-quality	100	HMM-based (lower-bound)	1
RGVC768	2022NBT-16210	138602	No	141	4	82	High-quality	High-quality	100	AAI-based (medium-confidence)	1
RGVC769	2022NBT-1622	593150	No	691	3	370	High-quality	High-quality	100	HMM-based (lower-bound)	1
RGVC770	2022NBT-16243	138315	No	120	4	57	Medium-quality	Genome-fragment	88.55	HMM-based (lower-bound)	1
RGVC771	2022NBT-16251	138278	No	201	30	4	Medium-quality	Genome-fragment	75.6	AAI-based (medium-confidence)	1
RGVC772	2022NBT-16276	138111	No	145	3	107	High-quality	High-quality	100	HMM-based (lower-bound)	1
RGVC773	2022NBT-16281_1	43860	Yes	139	24	41	Medium-quality	Genome-fragment	70.39	HMM-based (lower-bound)	1
RGVC774	2022NBT-163	929873	No	719	3	439	High-quality	High-quality	100	HMM-based (lower-bound)	1
RGVC775	2022NBT-16307	137880	No	206	33	4	Medium-quality	Genome-fragment	85.04	AAI-based (medium-confidence)	1
RGVC776	2022NBT-16326_1	60559	Yes	155	12	33	Medium-quality	Genome-fragment	54.65	AAI-based (medium-confidence)	1
RGVC777	2022NBT-1633_1	31426	Yes	734	11	473	Medium-quality	Genome-fragment	65.51	HMM-based (lower-bound)	1
RGVC778	2022NBT-16350	137616	No	167	34	2	High-quality	High-quality	100	AAI-based (high-confidence)	1
RGVC779	2022NBT-16374_1	37709	Yes	150	8	62	Medium-quality	Genome-fragment	59.28	HMM-based (lower-bound)	1
RGVC780	2022NBT-1642	590206	No	537	4	351	High-quality	High-quality	100	HMM-based (lower-bound)	1
RGVC781	2022NBT-16434	137066	No	224	12	0	High-quality	High-quality	100	AAI-based (medium-confidence)	1
RGVC782	2022NBT-16438_1	39240	Yes	155	13	72	Medium-quality	Genome-fragment	52.66	HMM-based (lower-bound)	1
RGVC783	2022NBT-1645_1	28435	Yes	693	13	432	Medium-quality	Genome-fragment	60.14	HMM-based (lower-bound)	1
RGVC784	2022NBT-1646	589438	No	593	5	336	High-quality	High-quality	100	HMM-based (lower-bound)	1
RGVC785	2022NBT-16471_1	63361	Yes	138	52	52	Complete	High-quality	100	Provirus (high-confidence)	1
RGVC786	2022NBT-1649	588529	No	527	10	305	High-quality	High-quality	100	HMM-based (lower-bound)	1
RGVC787	2022NBT-16492	136495	No	232	1	91	High-quality	High-quality	100	HMM-based (lower-bound)	1
RGVC788	2022NBT-16499	136455	No	187	26	1	High-quality	High-quality	100	AAI-based (medium-confidence)	1
RGVC789	2022NBT-165	928998	No	785	14	562	High-quality	High-quality	100	HMM-based (lower-bound)	1
RGVC790	2022NBT-1650	588492	No	497	3	309	High-quality	High-quality	100	HMM-based (lower-bound)	1
RGVC791	2022NBT-16502_1	41571	Yes	194	8	60	Medium-quality	Genome-fragment	63.22	HMM-based (lower-bound)	1
RGVC792	2022NBT-16519	136350	No	118	2	66	Medium-quality	Genome-fragment	63.28	HMM-based (lower-bound)	1
RGVC793	2022NBT-1652_1	63799	Yes	772	24	375	High-quality	High-quality	100	AAI-based (medium-confidence)	1
RGVC794	2022NBT-16525	136304	No	148	2	92	Medium-quality	Genome-fragment	78.96	HMM-based (lower-bound)	1
RGVC795	2022NBT-16535	136228	No	182	1	62	High-quality	High-quality	100	HMM-based (lower-bound)	1
RGVC796	2022NBT-1654_1	82015	Yes	682	36	363	Complete	High-quality	100	Provirus (high-confidence)	1.05
RGVC797	2022NBT-16543	136130	No	153	1	71	Medium-quality	Genome-fragment	86.24	HMM-based (lower-bound)	1
RGVC798	2022NBT-16547	136095	No	145	14	8	Medium-quality	Genome-fragment	89.24	AAI-based (medium-confidence)	1
RGVC799	2022NBT-16557	136071	No	122	2	39	High-quality	High-quality	100	HMM-based (lower-bound)	1
RGVC800	2022NBT-1659	586661	No	553	6	296	High-quality	High-quality	100	HMM-based (lower-bound)	1
RGVC801	2022NBT-1660	586577	No	508	8	311	High-quality	High-quality	100	HMM-based (lower-bound)	1
RGVC802	2022NBT-16619	135546	No	140	1	79	Medium-quality	Genome-fragment	55.09	HMM-based (lower-bound)	1
RGVC803	2022NBT-16653	135306	No	191	4	55	High-quality	High-quality	100	HMM-based (lower-bound)	1
RGVC804	2022NBT-16669	135229	No	160	2	51	Medium-quality	Genome-fragment	52.72	HMM-based (lower-bound)	1
RGVC805	2022NBT-16673	135199	No	117	2	64	High-quality	High-quality	100	HMM-based (lower-bound)	1
RGVC806	2022NBT-16674	135195	No	130	1	85	Medium-quality	Genome-fragment	87.01	HMM-based (lower-bound)	1
RGVC807	2022NBT-16676_2	45769	Yes	84	13	4	Medium-quality	Genome-fragment	71.02	HMM-based (lower-bound)	1
RGVC808	2022NBT-167	928617	No	713	3	440	High-quality	High-quality	100	HMM-based (lower-bound)	1
RGVC809	2022NBT-1670	585442	No	604	2	370	High-quality	High-quality	100	HMM-based (lower-bound)	1
RGVC810	2022NBT-16707	134993	No	179	1	77	High-quality	High-quality	100	HMM-based (lower-bound)	1
RGVC811	2022NBT-16712	134954	No	152	5	43	Medium-quality	Genome-fragment	87.4	HMM-based (lower-bound)	1
RGVC812	2022NBT-16715_1	55572	Yes	206	18	42	High-quality	High-quality	100	AAI-based (medium-confidence)	1
RGVC813	2022NBT-16721	134907	No	167	33	1	High-quality	High-quality	94.33	AAI-based (medium-confidence)	1
RGVC814	2022NBT-16722	134905	No	130	3	70	High-quality	High-quality	100	HMM-based (lower-bound)	1
RGVC815	2022NBT-1673	585149	No	444	2	323	High-quality	High-quality	100	HMM-based (lower-bound)	1
RGVC816	2022NBT-16739	134813	No	129	1	71	High-quality	High-quality	100	HMM-based (lower-bound)	1
RGVC817	2022NBT-1674	584982	No	556	1	272	High-quality	High-quality	100	HMM-based (lower-bound)	1
RGVC818	2022NBT-16768_1	37337	Yes	143	5	79	Medium-quality	Genome-fragment	56.27	HMM-based (lower-bound)	1
RGVC819	2022NBT-1678	584087	No	631	4	421	High-quality	High-quality	100	HMM-based (lower-bound)	1
RGVC820	2022NBT-16844	134171	No	209	3	82	High-quality	High-quality	96.76	HMM-based (lower-bound)	1
RGVC821	2022NBT-1687	581925	No	603	4	298	High-quality	High-quality	100	HMM-based (lower-bound)	1
RGVC822	2022NBT-16870_1	84156	Yes	139	21	48	High-quality	High-quality	100	AAI-based (high-confidence)	1
RGVC823	2022NBT-1688	581828	No	563	5	364	High-quality	High-quality	100	HMM-based (lower-bound)	1
RGVC824	2022NBT-16883	133880	No	187	4	84	High-quality	High-quality	100	HMM-based (lower-bound)	1
RGVC825	2022NBT-16884	133871	No	190	1	89	High-quality	High-quality	100	HMM-based (lower-bound)	1
RGVC826	2022NBT-169	928275	No	779	9	540	High-quality	High-quality	100	HMM-based (lower-bound)	1
RGVC827	2022NBT-16903	133674	No	225	2	75	High-quality	High-quality	100	HMM-based (lower-bound)	1
RGVC828	2022NBT-1691	581592	No	491	5	293	Medium-quality	Genome-fragment	84.89	HMM-based (lower-bound)	1
RGVC829	2022NBT-16910	133612	No	155	7	79	High-quality	High-quality	100	HMM-based (lower-bound)	1
RGVC830	2022NBT-1692	581502	No	530	8	344	High-quality	High-quality	100	HMM-based (lower-bound)	1
RGVC831	2022NBT-16929	133446	No	109	1	86	High-quality	High-quality	90.49	HMM-based (lower-bound)	1
RGVC832	2022NBT-1696	580994	No	514	16	363	High-quality	High-quality	100	HMM-based (lower-bound)	1
RGVC833	2022NBT-16962	133190	No	139	5	25	High-quality	High-quality	91.58	HMM-based (lower-bound)	1
RGVC834	2022NBT-16973	133099	No	138	3	43	High-quality	High-quality	96.15	HMM-based (lower-bound)	1
RGVC835	2022NBT-16980_1	50165	Yes	162	18	52	Medium-quality	Genome-fragment	78.01	HMM-based (lower-bound)	1
RGVC836	2022NBT-16997	132956	No	171	4	47	Medium-quality	Genome-fragment	71.47	HMM-based (lower-bound)	1
RGVC837	2022NBT-16998	132953	No	114	2	53	High-quality	High-quality	95.15	HMM-based (lower-bound)	1
RGVC838	2022NBT-170	928238	No	978	1	538	High-quality	High-quality	100	HMM-based (lower-bound)	1.01
RGVC839	2022NBT-17009	132899	No	224	1	35	High-quality	High-quality	100	HMM-based (lower-bound)	1
RGVC840	2022NBT-17014	132873	No	175	14	25	High-quality	High-quality	98.57	HMM-based (lower-bound)	1
RGVC841	2022NBT-17021_1	119100	Yes	224	24	10	Medium-quality	Genome-fragment	68.04	HMM-based (lower-bound)	1
RGVC842	2022NBT-17027	132819	No	213	21	2	Medium-quality	Genome-fragment	82.2	AAI-based (medium-confidence)	1
RGVC843	2022NBT-17028_1	35002	Yes	176	16	75	Medium-quality	Genome-fragment	56.82	HMM-based (lower-bound)	1
RGVC844	2022NBT-17049	132662	No	179	22	27	High-quality	High-quality	98.12	HMM-based (lower-bound)	1
RGVC845	2022NBT-1705_1	38594	Yes	564	8	340	Medium-quality	Genome-fragment	57.08	HMM-based (lower-bound)	1
RGVC846	2022NBT-17063_1	54656	Yes	185	5	52	Medium-quality	Genome-fragment	75.31	HMM-based (lower-bound)	1
RGVC847	2022NBT-1709	579775	No	548	4	356	High-quality	High-quality	100	HMM-based (lower-bound)	1
RGVC848	2022NBT-17107	132322	No	127	2	53	High-quality	High-quality	100	HMM-based (lower-bound)	1
RGVC849	2022NBT-17110	132297	No	158	29	2	Medium-quality	Genome-fragment	84.13	AAI-based (medium-confidence)	1
RGVC850	2022NBT-17115	132282	No	135	2	64	High-quality	High-quality	100	HMM-based (lower-bound)	1
RGVC851	2022NBT-1717_1	37719	Yes	564	14	358	Medium-quality	Genome-fragment	63.01	HMM-based (lower-bound)	1
RGVC852	2022NBT-17197	131757	No	210	53	7	Medium-quality	Genome-fragment	79.34	HMM-based (lower-bound)	1
RGVC853	2022NBT-172	927999	No	851	2	518	High-quality	High-quality	100	HMM-based (lower-bound)	1
RGVC854	2022NBT-1722	576578	No	524	6	367	High-quality	High-quality	100	HMM-based (lower-bound)	1
RGVC855	2022NBT-1726	576177	No	561	3	380	High-quality	High-quality	100	HMM-based (lower-bound)	1
RGVC856	2022NBT-1727	576042	No	628	2	334	High-quality	High-quality	100	HMM-based (lower-bound)	1
RGVC857	2022NBT-17278	131206	No	137	2	77	Medium-quality	Genome-fragment	86.55	HMM-based (lower-bound)	1
RGVC858	2022NBT-17288	131117	No	252	2	36	High-quality	High-quality	100	HMM-based (lower-bound)	1
RGVC859	2022NBT-173	927804	No	850	6	504	High-quality	High-quality	100	HMM-based (lower-bound)	1
RGVC860	2022NBT-17300	131070	No	183	32	3	High-quality	High-quality	100	AAI-based (medium-confidence)	1
RGVC861	2022NBT-17309_1	81696	Yes	198	16	38	High-quality	High-quality	90.54	HMM-based (lower-bound)	1
RGVC862	2022NBT-17337	130885	No	134	2	29	Medium-quality	Genome-fragment	86.39	HMM-based (lower-bound)	1
RGVC863	2022NBT-1734	574582	No	461	2	216	High-quality	High-quality	100	HMM-based (lower-bound)	1.01
RGVC864	2022NBT-17340	130875	No	112	6	47	High-quality	High-quality	99.16	HMM-based (lower-bound)	1
RGVC865	2022NBT-17355_1	36543	Yes	235	8	37	Medium-quality	Genome-fragment	62.38	HMM-based (lower-bound)	1
RGVC866	2022NBT-1736_1	56666	Yes	540	11	320	Medium-quality	Genome-fragment	78.64	HMM-based (lower-bound)	1
RGVC867	2022NBT-17410	130433	No	181	1	110	Medium-quality	Genome-fragment	73.78	HMM-based (lower-bound)	1
RGVC868	2022NBT-17414	130417	No	171	3	45	High-quality	High-quality	100	HMM-based (lower-bound)	1
RGVC869	2022NBT-1742_1	42328	Yes	496	22	309	Medium-quality	Genome-fragment	61.3	HMM-based (lower-bound)	1
RGVC870	2022NBT-17428	130336	No	142	2	78	Medium-quality	Genome-fragment	60.1	HMM-based (lower-bound)	1
RGVC871	2022NBT-1746	572770	No	574	2	395	High-quality	High-quality	100	HMM-based (lower-bound)	1
RGVC872	2022NBT-17468	129984	No	236	29	0	High-quality	High-quality	96.7	AAI-based (medium-confidence)	1
RGVC873	2022NBT-1748	572674	No	575	3	315	High-quality	High-quality	100	HMM-based (lower-bound)	1
RGVC874	2022NBT-17490	129896	No	188	1	90	High-quality	High-quality	100	HMM-based (lower-bound)	1
RGVC875	2022NBT-1750	572555	No	477	3	274	Medium-quality	Genome-fragment	76.54	HMM-based (lower-bound)	1
RGVC876	2022NBT-17508	129732	No	134	2	58	High-quality	High-quality	94.27	HMM-based (lower-bound)	1
RGVC877	2022NBT-1752	571988	No	492	6	342	High-quality	High-quality	99	HMM-based (lower-bound)	1
RGVC878	2022NBT-1753	571687	No	502	3	324	High-quality	High-quality	100	HMM-based (lower-bound)	1
RGVC879	2022NBT-1755	571576	No	505	1	332	High-quality	High-quality	100	HMM-based (lower-bound)	1.01
RGVC880	2022NBT-17568	129358	No	140	2	65	High-quality	High-quality	100	HMM-based (lower-bound)	1
RGVC881	2022NBT-17569	129351	No	230	1	61	High-quality	High-quality	100	HMM-based (lower-bound)	1
RGVC882	2022NBT-1758_1	37745	Yes	525	13	360	Medium-quality	Genome-fragment	58.38	HMM-based (lower-bound)	1
RGVC883	2022NBT-17594	129104	No	197	4	30	Medium-quality	Genome-fragment	77.67	HMM-based (lower-bound)	1
RGVC884	2022NBT-17623	128921	No	200	1	39	High-quality	High-quality	100	HMM-based (lower-bound)	1
RGVC885	2022NBT-17625	128914	No	112	1	54	Medium-quality	Genome-fragment	86.24	HMM-based (lower-bound)	1
RGVC886	2022NBT-1763_1	81171	Yes	548	17	247	Medium-quality	Genome-fragment	86.38	HMM-based (lower-bound)	1
RGVC887	2022NBT-17632	128877	No	162	2	43	Medium-quality	Genome-fragment	88.84	HMM-based (lower-bound)	1
RGVC888	2022NBT-1765	569619	No	569	3	406	High-quality	High-quality	100	HMM-based (lower-bound)	1
RGVC889	2022NBT-17657	128740	No	193	5	68	High-quality	High-quality	96.86	HMM-based (lower-bound)	1
RGVC890	2022NBT-1766	569586	No	597	4	401	High-quality	High-quality	100	HMM-based (lower-bound)	1
RGVC891	2022NBT-17667_1	42791	Yes	209	25	57	Medium-quality	Genome-fragment	72.32	HMM-based (lower-bound)	1
RGVC892	2022NBT-17680	128611	No	129	3	35	Medium-quality	Genome-fragment	80.1	HMM-based (lower-bound)	1
RGVC893	2022NBT-177	927243	No	830	2	572	High-quality	High-quality	100	HMM-based (lower-bound)	1
RGVC894	2022NBT-17724	128368	No	148	6	47	High-quality	High-quality	92.25	HMM-based (lower-bound)	1
RGVC895	2022NBT-17733	128326	No	181	2	28	Medium-quality	Genome-fragment	85.09	HMM-based (lower-bound)	1
RGVC896	2022NBT-1774	568786	No	522	5	300	High-quality	High-quality	100	HMM-based (lower-bound)	1
RGVC897	2022NBT-17742	128221	No	112	1	60	Medium-quality	Genome-fragment	86.19	HMM-based (lower-bound)	1
RGVC898	2022NBT-17747_1	91361	Yes	166	25	26	High-quality	High-quality	100	AAI-based (medium-confidence)	1
RGVC899	2022NBT-17763_1	36523	Yes	183	8	64	Medium-quality	Genome-fragment	53.76	HMM-based (lower-bound)	1
RGVC900	2022NBT-17764	128073	No	113	3	24	High-quality	High-quality	94.74	HMM-based (lower-bound)	1
RGVC901	2022NBT-1777	568085	No	492	5	316	High-quality	High-quality	100	HMM-based (lower-bound)	1
RGVC902	2022NBT-17772	127984	No	157	5	70	High-quality	High-quality	93.23	HMM-based (lower-bound)	1
RGVC903	2022NBT-17776	127938	No	205	1	95	High-quality	High-quality	100	HMM-based (lower-bound)	1
RGVC904	2022NBT-17786	127801	No	139	1	85	Medium-quality	Genome-fragment	54.44	HMM-based (lower-bound)	1
RGVC905	2022NBT-17789_1	79410	Yes	228	20	44	Complete	High-quality	100	Provirus (high-confidence)	1
RGVC906	2022NBT-17796_1	54309	Yes	181	9	45	Medium-quality	Genome-fragment	77.65	HMM-based (lower-bound)	1
RGVC907	2022NBT-17800	127708	No	116	5	65	High-quality	High-quality	95.96	HMM-based (lower-bound)	1
RGVC908	2022NBT-17809	127646	No	177	49	7	Complete	High-quality	100	DTR (medium-confidence)	1
RGVC909	2022NBT-1781	567307	No	600	8	294	High-quality	High-quality	100	HMM-based (lower-bound)	1
RGVC910	2022NBT-17845	127404	No	158	2	55	Medium-quality	Genome-fragment	71.49	HMM-based (lower-bound)	1
RGVC911	2022NBT-1786	566112	No	775	2	215	High-quality	High-quality	100	HMM-based (lower-bound)	1
RGVC912	2022NBT-1788	565591	No	515	4	320	High-quality	High-quality	100	HMM-based (lower-bound)	1
RGVC913	2022NBT-17886	127096	No	151	3	67	High-quality	High-quality	98.42	HMM-based (lower-bound)	1
RGVC914	2022NBT-1789	565548	No	443	6	269	High-quality	High-quality	100	HMM-based (lower-bound)	1
RGVC915	2022NBT-17895_1	87552	Yes	138	31	36	Complete	High-quality	100	Provirus (high-confidence)	1
RGVC916	2022NBT-17897	127012	No	148	3	44	Medium-quality	Genome-fragment	85.95	HMM-based (lower-bound)	1
RGVC917	2022NBT-179	926506	No	728	6	413	High-quality	High-quality	100	HMM-based (lower-bound)	1
RGVC918	2022NBT-17901	126990	No	167	38	7	Medium-quality	Genome-fragment	78.18	AAI-based (medium-confidence)	1
RGVC919	2022NBT-17959	126650	No	132	4	18	Medium-quality	Genome-fragment	58.78	HMM-based (lower-bound)	1
RGVC920	2022NBT-17961_1	97162	Yes	133	40	21	Complete	High-quality	100	Provirus (high-confidence)	1
RGVC921	2022NBT-1797	564297	No	656	5	333	High-quality	High-quality	100	HMM-based (lower-bound)	1
RGVC922	2022NBT-17971	126599	No	125	8	80	High-quality	High-quality	98.03	HMM-based (lower-bound)	1
RGVC923	2022NBT-17973	126593	No	201	25	3	Medium-quality	Genome-fragment	82.32	AAI-based (high-confidence)	1
RGVC924	2022NBT-18001	126378	No	118	2	32	High-quality	High-quality	95.96	HMM-based (lower-bound)	1
RGVC925	2022NBT-1801	563436	No	584	5	367	High-quality	High-quality	100	HMM-based (lower-bound)	1
RGVC926	2022NBT-18012	126311	No	159	18	1	High-quality	High-quality	100	AAI-based (high-confidence)	1
RGVC927	2022NBT-1802_1	44258	Yes	50	13	10	Medium-quality	Genome-fragment	57.63	AAI-based (high-confidence)	1
RGVC928	2022NBT-18024_1	40692	Yes	169	16	47	High-quality	High-quality	93.56	AAI-based (medium-confidence)	1
RGVC929	2022NBT-18037	126141	No	144	5	78	High-quality	High-quality	93.63	HMM-based (lower-bound)	1
RGVC930	2022NBT-18065	126001	No	113	1	75	Medium-quality	Genome-fragment	79.5	HMM-based (lower-bound)	1
RGVC931	2022NBT-18075	125947	No	139	2	80	High-quality	High-quality	100	HMM-based (lower-bound)	1
RGVC932	2022NBT-18082	125872	No	139	3	53	High-quality	High-quality	100	HMM-based (lower-bound)	1
RGVC933	2022NBT-18093_1	37633	Yes	114	19	56	Medium-quality	Genome-fragment	57.32	AAI-based (high-confidence)	1
RGVC934	2022NBT-1810_1	36518	Yes	504	15	290	Medium-quality	Genome-fragment	60.05	HMM-based (lower-bound)	1
RGVC935	2022NBT-18118	125654	No	128	2	64	High-quality	High-quality	95.79	HMM-based (lower-bound)	1
RGVC936	2022NBT-1813	561995	No	882	1	380	High-quality	High-quality	100	HMM-based (lower-bound)	1
RGVC937	2022NBT-1814	561812	No	554	4	334	High-quality	High-quality	100	HMM-based (lower-bound)	1
RGVC938	2022NBT-18153	125371	No	197	5	60	High-quality	High-quality	90.9	HMM-based (lower-bound)	1
RGVC939	2022NBT-1820	560532	No	515	4	300	High-quality	High-quality	90.1	HMM-based (lower-bound)	1
RGVC940	2022NBT-18207	124963	No	183	19	29	High-quality	High-quality	98.1	HMM-based (lower-bound)	1
RGVC941	2022NBT-18211	124948	No	149	1	77	High-quality	High-quality	100	HMM-based (lower-bound)	1
RGVC942	2022NBT-1822_1	50210	Yes	633	29	281	Medium-quality	Genome-fragment	78.29	HMM-based (lower-bound)	1
RGVC943	2022NBT-18225	124848	No	116	1	88	Medium-quality	Genome-fragment	71.3	HMM-based (lower-bound)	1
RGVC944	2022NBT-1823	560460	No	563	5	391	High-quality	High-quality	100	HMM-based (lower-bound)	1
RGVC945	2022NBT-1824	560421	No	604	2	356	High-quality	High-quality	100	HMM-based (lower-bound)	1
RGVC946	2022NBT-1827	560222	No	579	7	345	High-quality	High-quality	100	HMM-based (lower-bound)	1
RGVC947	2022NBT-18293	124346	No	164	37	5	High-quality	High-quality	99.71	AAI-based (medium-confidence)	1
RGVC948	2022NBT-18296_1	63211	Yes	120	16	23	High-quality	High-quality	100	AAI-based (high-confidence)	1
RGVC949	2022NBT-18314	124246	No	138	3	70	High-quality	High-quality	100	HMM-based (lower-bound)	1
RGVC950	2022NBT-1832	559489	No	623	2	388	High-quality	High-quality	100	HMM-based (lower-bound)	1
RGVC951	2022NBT-18334	124114	No	133	1	31	High-quality	High-quality	100	HMM-based (lower-bound)	1
RGVC952	2022NBT-1836	559029	No	598	3	354	High-quality	High-quality	100	HMM-based (lower-bound)	1
RGVC953	2022NBT-18366	123889	No	167	42	5	High-quality	High-quality	100	AAI-based (medium-confidence)	1
RGVC954	2022NBT-1837_1	32711	Yes	562	19	389	Medium-quality	Genome-fragment	52.92	HMM-based (lower-bound)	1
RGVC955	2022NBT-18370_1	78678	Yes	180	3	26	High-quality	High-quality	95.73	HMM-based (lower-bound)	1
RGVC956	2022NBT-1839	558787	No	452	11	253	High-quality	High-quality	100	HMM-based (lower-bound)	1
RGVC957	2022NBT-18392	123700	No	147	2	59	Medium-quality	Genome-fragment	75.35	HMM-based (lower-bound)	1
RGVC958	2022NBT-18396	123681	No	160	25	2	High-quality	High-quality	100	AAI-based (medium-confidence)	1
RGVC959	2022NBT-1840_1	43269	Yes	494	15	303	Complete	High-quality	100	Provirus (medium-confidence)	1
RGVC960	2022NBT-18403	123615	No	129	4	78	High-quality	High-quality	97.56	HMM-based (lower-bound)	1
RGVC961	2022NBT-18410_1	33225	Yes	153	18	43	Medium-quality	Genome-fragment	55.1	HMM-based (lower-bound)	1
RGVC962	2022NBT-1844_1	19735	Yes	31	12	0	Medium-quality	Genome-fragment	75.8	AAI-based (medium-confidence)	1
RGVC963	2022NBT-18443	123349	No	114	2	54	High-quality	High-quality	100	HMM-based (lower-bound)	1
RGVC964	2022NBT-18452	123294	No	129	2	73	High-quality	High-quality	100	HMM-based (lower-bound)	1
RGVC965	2022NBT-1847	557616	No	623	5	354	High-quality	High-quality	100	HMM-based (lower-bound)	1
RGVC966	2022NBT-18476	123130	No	204	1	41	High-quality	High-quality	100	HMM-based (lower-bound)	1
RGVC967	2022NBT-1849	557548	No	527	11	305	High-quality	High-quality	100	HMM-based (lower-bound)	1
RGVC968	2022NBT-18491	123059	No	181	1	23	High-quality	High-quality	100	HMM-based (lower-bound)	1
RGVC969	2022NBT-18497	123011	No	174	1	51	Medium-quality	Genome-fragment	69.58	HMM-based (lower-bound)	1
RGVC970	2022NBT-1850	557520	No	554	1	344	High-quality	High-quality	100	HMM-based (lower-bound)	1
RGVC971	2022NBT-18510	122908	No	208	5	51	High-quality	High-quality	93.22	HMM-based (lower-bound)	1
RGVC972	2022NBT-18519_1	36017	Yes	126	3	52	Medium-quality	Genome-fragment	55.34	HMM-based (lower-bound)	1
RGVC973	2022NBT-1852	557280	No	508	4	321	High-quality	High-quality	100	HMM-based (lower-bound)	1
RGVC974	2022NBT-1854	556813	No	502	3	312	High-quality	High-quality	100	HMM-based (lower-bound)	1
RGVC975	2022NBT-18540	122696	No	98	3	34	High-quality	High-quality	100	HMM-based (lower-bound)	1
RGVC976	2022NBT-18551	122640	No	127	1	76	High-quality	High-quality	100	HMM-based (lower-bound)	1
RGVC977	2022NBT-18559	122584	No	181	27	3	Complete	High-quality	100	DTR (medium-confidence)	1
RGVC978	2022NBT-1856	556718	No	559	5	323	High-quality	High-quality	100	HMM-based (lower-bound)	1
RGVC979	2022NBT-1857	556657	No	609	2	384	High-quality	High-quality	100	HMM-based (lower-bound)	1
RGVC980	2022NBT-1858	556639	No	562	4	362	High-quality	High-quality	100	HMM-based (lower-bound)	1
RGVC981	2022NBT-186	924488	No	825	1	500	High-quality	High-quality	100	HMM-based (lower-bound)	1
RGVC982	2022NBT-1860	556439	No	585	6	322	High-quality	High-quality	100	HMM-based (lower-bound)	1
RGVC983	2022NBT-18608	122254	No	152	34	4	High-quality	High-quality	100	AAI-based (high-confidence)	1
RGVC984	2022NBT-1862_1	50901	Yes	510	12	362	Medium-quality	Genome-fragment	71.8	HMM-based (lower-bound)	1
RGVC985	2022NBT-18638	122091	No	198	1	69	High-quality	High-quality	100	HMM-based (lower-bound)	1
RGVC986	2022NBT-1864	556145	No	552	15	426	High-quality	High-quality	100	HMM-based (lower-bound)	1
RGVC987	2022NBT-18649	122017	No	213	39	1	Complete	High-quality	100	DTR (high-confidence)	1
RGVC988	2022NBT-18657_1	39920	Yes	155	5	49	Medium-quality	Genome-fragment	53.55	HMM-based (lower-bound)	1
RGVC989	2022NBT-1866	555831	No	602	5	384	High-quality	High-quality	100	HMM-based (lower-bound)	1
RGVC990	2022NBT-18690_1	50025	Yes	134	19	38	High-quality	High-quality	100	AAI-based (high-confidence)	1
RGVC991	2022NBT-187	924401	No	896	11	532	High-quality	High-quality	100	HMM-based (lower-bound)	1
RGVC992	2022NBT-1871	554992	No	520	15	342	High-quality	High-quality	100	HMM-based (lower-bound)	1
RGVC993	2022NBT-1872_1	39878	Yes	540	17	325	Medium-quality	Genome-fragment	60.31	HMM-based (lower-bound)	1
RGVC994	2022NBT-18720	121598	No	146	3	94	Medium-quality	Genome-fragment	77.73	HMM-based (lower-bound)	1
RGVC995	2022NBT-1874	554705	No	525	8	337	High-quality	High-quality	100	HMM-based (lower-bound)	1
RGVC996	2022NBT-18741_1	58741	Yes	211	14	43	Medium-quality	Genome-fragment	89.08	HMM-based (lower-bound)	1
RGVC997	2022NBT-18751	121452	No	184	41	5	Complete	High-quality	100	DTR (high-confidence)	1
RGVC998	2022NBT-18754_1	26949	Yes	130	19	42	Medium-quality	Genome-fragment	57.62	AAI-based (medium-confidence)	1
RGVC999	2022NBT-1876	554567	No	432	1	217	High-quality	High-quality	100	HMM-based (lower-bound)	1
RGVC1000	2022NBT-18762	121377	No	173	2	32	High-quality	High-quality	100	HMM-based (lower-bound)	1
RGVC1001	2022NBT-1877	554296	No	492	1	339	High-quality	High-quality	100	HMM-based (lower-bound)	1
RGVC1002	2022NBT-18784_1	28768	Yes	119	21	68	Medium-quality	Genome-fragment	62.61	AAI-based (medium-confidence)	1
RGVC1003	2022NBT-18791	121178	No	176	1	71	Medium-quality	Genome-fragment	70	HMM-based (lower-bound)	1
RGVC1004	2022NBT-188	924324	No	898	1	581	High-quality	High-quality	100	HMM-based (lower-bound)	1
RGVC1005	2022NBT-1880	554258	No	561	2	370	High-quality	High-quality	100	HMM-based (lower-bound)	1
RGVC1006	2022NBT-18801	121095	No	189	30	3	High-quality	High-quality	100	AAI-based (medium-confidence)	1
RGVC1007	2022NBT-1884_1	44877	Yes	543	10	331	Medium-quality	Genome-fragment	58.66	HMM-based (lower-bound)	1
RGVC1008	2022NBT-18845_1	59835	Yes	167	8	42	High-quality	High-quality	98.67	HMM-based (lower-bound)	1
RGVC1009	2022NBT-18849_1	116436	Yes	187	20	10	Medium-quality	Genome-fragment	74.75	AAI-based (high-confidence)	1
RGVC1010	2022NBT-1885	553202	No	903	1	404	High-quality	High-quality	100	HMM-based (lower-bound)	1
RGVC1011	2022NBT-18866	120678	No	124	2	64	High-quality	High-quality	100	HMM-based (lower-bound)	1
RGVC1012	2022NBT-18885	120558	No	144	2	72	High-quality	High-quality	97.13	HMM-based (lower-bound)	1
RGVC1013	2022NBT-18889	120555	No	109	4	51	High-quality	High-quality	100	HMM-based (lower-bound)	1
RGVC1014	2022NBT-18926	120390	No	181	26	2	High-quality	High-quality	100	AAI-based (medium-confidence)	1
RGVC1015	2022NBT-1895_1	37936	Yes	596	25	351	Medium-quality	Genome-fragment	52.06	HMM-based (lower-bound)	1
RGVC1016	2022NBT-18952	120250	No	170	28	2	High-quality	High-quality	90.29	AAI-based (high-confidence)	1
RGVC1017	2022NBT-19012	119898	No	116	2	48	Medium-quality	Genome-fragment	69.14	HMM-based (lower-bound)	1
RGVC1018	2022NBT-19013	119891	No	188	10	43	High-quality	High-quality	100	AAI-based (high-confidence)	1
RGVC1019	2022NBT-1903	550879	No	524	1	390	High-quality	High-quality	100	HMM-based (lower-bound)	1
RGVC1020	2022NBT-19037	119758	No	131	16	3	High-quality	High-quality	100	AAI-based (medium-confidence)	1
RGVC1021	2022NBT-1904_1	63482	Yes	442	8	248	Complete	High-quality	100	Provirus (high-confidence)	1
RGVC1022	2022NBT-19041_1	40090	Yes	142	18	33	Medium-quality	Genome-fragment	63.84	HMM-based (lower-bound)	1
RGVC1023	2022NBT-19045	119737	No	168	4	34	Medium-quality	Genome-fragment	88.1	HMM-based (lower-bound)	1
RGVC1024	2022NBT-19061	119630	No	172	3	27	High-quality	High-quality	93.28	HMM-based (lower-bound)	1
RGVC1025	2022NBT-19062_1	55666	Yes	24	3	0	Medium-quality	Genome-fragment	51.59	HMM-based (lower-bound)	1
RGVC1026	2022NBT-19066_1	80057	Yes	130	18	33	High-quality	High-quality	98.71	HMM-based (lower-bound)	1
RGVC1027	2022NBT-19067_1	81639	Yes	156	17	29	Medium-quality	Genome-fragment	86.53	HMM-based (lower-bound)	1
RGVC1028	2022NBT-1907	550262	No	634	7	314	High-quality	High-quality	100	HMM-based (lower-bound)	1
RGVC1029	2022NBT-19081	119518	No	156	4	80	High-quality	High-quality	92.57	HMM-based (lower-bound)	1
RGVC1030	2022NBT-19091	119466	No	165	38	3	Medium-quality	Genome-fragment	75.18	AAI-based (medium-confidence)	1
RGVC1031	2022NBT-191	923672	No	780	2	552	High-quality	High-quality	100	HMM-based (lower-bound)	1
RGVC1032	2022NBT-1911	549716	No	529	7	401	High-quality	High-quality	100	HMM-based (lower-bound)	1
RGVC1033	2022NBT-19120	119314	No	169	1	41	High-quality	High-quality	100	HMM-based (lower-bound)	1
RGVC1034	2022NBT-1914	549285	No	543	8	353	High-quality	High-quality	99.67	HMM-based (lower-bound)	1
RGVC1035	2022NBT-19142	119177	No	140	3	56	High-quality	High-quality	100	HMM-based (lower-bound)	1
RGVC1036	2022NBT-19148_1	67222	Yes	137	26	33	Complete	High-quality	100	Provirus (high-confidence)	1
RGVC1037	2022NBT-19163	119065	No	117	2	47	Medium-quality	Genome-fragment	85.07	HMM-based (lower-bound)	1
RGVC1038	2022NBT-19177	118994	No	160	1	44	Medium-quality	Genome-fragment	72.01	HMM-based (lower-bound)	1
RGVC1039	2022NBT-19191	118870	No	123	1	61	High-quality	High-quality	100	HMM-based (lower-bound)	1
RGVC1040	2022NBT-19193	118863	No	108	1	17	Medium-quality	Genome-fragment	58.3	HMM-based (lower-bound)	1
RGVC1041	2022NBT-1921_1	38194	Yes	499	13	295	Medium-quality	Genome-fragment	63.81	HMM-based (lower-bound)	1
RGVC1042	2022NBT-19216	118722	No	117	2	59	Medium-quality	Genome-fragment	88.94	HMM-based (lower-bound)	1
RGVC1043	2022NBT-19217_1	39827	Yes	128	21	46	Medium-quality	Genome-fragment	59.66	HMM-based (lower-bound)	1
RGVC1044	2022NBT-19230	118625	No	122	3	63	High-quality	High-quality	90.47	HMM-based (lower-bound)	1
RGVC1045	2022NBT-19250	118518	No	155	1	60	Medium-quality	Genome-fragment	76	HMM-based (lower-bound)	1
RGVC1046	2022NBT-19257	118483	No	125	1	46	High-quality	High-quality	100	HMM-based (lower-bound)	1
RGVC1047	2022NBT-1926	547918	No	588	6	325	High-quality	High-quality	100	HMM-based (lower-bound)	1
RGVC1048	2022NBT-19273	118415	No	164	13	1	High-quality	High-quality	100	AAI-based (medium-confidence)	1
RGVC1049	2022NBT-1929	547813	No	542	1	358	High-quality	High-quality	100	HMM-based (lower-bound)	1
RGVC1050	2022NBT-19323_1	47770	Yes	170	20	30	Medium-quality	Genome-fragment	65.67	HMM-based (lower-bound)	1
RGVC1051	2022NBT-19349	118113	No	114	4	36	Medium-quality	Genome-fragment	76.17	HMM-based (lower-bound)	1
RGVC1052	2022NBT-19352	118094	No	134	1	75	High-quality	High-quality	100	HMM-based (lower-bound)	1
RGVC1053	2022NBT-19367	118023	No	182	2	69	High-quality	High-quality	100	HMM-based (lower-bound)	1
RGVC1054	2022NBT-19370	118019	No	123	2	37	Medium-quality	Genome-fragment	79.17	HMM-based (lower-bound)	1
RGVC1055	2022NBT-19378	117984	No	121	2	70	High-quality	High-quality	100	HMM-based (lower-bound)	1
RGVC1056	2022NBT-19395	117876	No	121	2	33	Medium-quality	Genome-fragment	89.71	HMM-based (lower-bound)	1
RGVC1057	2022NBT-19426	117673	No	119	1	62	High-quality	High-quality	100	HMM-based (lower-bound)	1
RGVC1058	2022NBT-19431_1	80035	Yes	191	30	28	High-quality	High-quality	92.89	HMM-based (lower-bound)	1
RGVC1059	2022NBT-1944	546604	No	505	3	295	High-quality	High-quality	100	HMM-based (lower-bound)	1
RGVC1060	2022NBT-19471	117477	No	109	3	30	Medium-quality	Genome-fragment	75.48	HMM-based (lower-bound)	1
RGVC1061	2022NBT-19495	117358	No	138	11	3	High-quality	High-quality	97.65	AAI-based (medium-confidence)	1
RGVC1062	2022NBT-195	920285	No	834	11	515	High-quality	High-quality	100	HMM-based (lower-bound)	1
RGVC1063	2022NBT-1951	545692	No	631	8	304	High-quality	High-quality	100	HMM-based (lower-bound)	1
RGVC1064	2022NBT-19521	117178	No	118	3	63	High-quality	High-quality	90.13	HMM-based (lower-bound)	1
RGVC1065	2022NBT-19575	116872	No	187	3	105	High-quality	High-quality	100	HMM-based (lower-bound)	1
RGVC1066	2022NBT-1958	544849	No	549	1	410	High-quality	High-quality	100	HMM-based (lower-bound)	1
RGVC1067	2022NBT-19589_1	27647	Yes	143	10	65	Medium-quality	Genome-fragment	66.59	AAI-based (medium-confidence)	1
RGVC1068	2022NBT-196	919700	No	831	2	464	High-quality	High-quality	100	HMM-based (lower-bound)	1.01
RGVC1069	2022NBT-19606	116691	No	128	5	67	High-quality	High-quality	92.75	HMM-based (lower-bound)	1
RGVC1070	2022NBT-19628	116565	No	135	3	47	Medium-quality	Genome-fragment	82.86	HMM-based (lower-bound)	1
RGVC1071	2022NBT-19631_1	25251	Yes	124	19	48	Medium-quality	Genome-fragment	54.58	AAI-based (high-confidence)	1
RGVC1072	2022NBT-19638	116524	No	141	4	84	High-quality	High-quality	97.72	HMM-based (lower-bound)	1
RGVC1073	2022NBT-19649	116495	No	161	4	34	Medium-quality	Genome-fragment	89.81	HMM-based (lower-bound)	1
RGVC1074	2022NBT-19657	116474	No	122	1	69	High-quality	High-quality	100	HMM-based (lower-bound)	1
RGVC1075	2022NBT-19659	116468	No	151	1	76	High-quality	High-quality	100	HMM-based (lower-bound)	1
RGVC1076	2022NBT-19676	116364	No	176	4	74	High-quality	High-quality	93.33	HMM-based (lower-bound)	1
RGVC1077	2022NBT-1968_1	67885	Yes	465	22	251	Complete	High-quality	100	Provirus (medium-confidence)	1
RGVC1078	2022NBT-19695	116284	No	120	1	58	High-quality	High-quality	93.31	HMM-based (lower-bound)	1
RGVC1079	2022NBT-1971	543529	No	539	3	299	High-quality	High-quality	100	HMM-based (lower-bound)	1
RGVC1080	2022NBT-1972	543127	No	571	10	339	High-quality	High-quality	100	HMM-based (lower-bound)	1
RGVC1081	2022NBT-1973	543119	No	473	1	326	High-quality	High-quality	100	HMM-based (lower-bound)	1
RGVC1082	2022NBT-19738	116075	No	142	1	76	High-quality	High-quality	100	HMM-based (lower-bound)	1
RGVC1083	2022NBT-19754	115984	No	207	3	59	Medium-quality	Genome-fragment	79.57	HMM-based (lower-bound)	1
RGVC1084	2022NBT-19763	115917	No	117	1	61	High-quality	High-quality	100	HMM-based (lower-bound)	1
RGVC1085	2022NBT-19773	115841	No	143	5	87	High-quality	High-quality	97.68	HMM-based (lower-bound)	1
RGVC1086	2022NBT-19780	115788	No	167	1	56	High-quality	High-quality	100	HMM-based (lower-bound)	1
RGVC1087	2022NBT-19796	115693	No	135	2	62	Medium-quality	Genome-fragment	77.02	HMM-based (lower-bound)	1
RGVC1088	2022NBT-19827_1	65952	Yes	123	15	20	High-quality	High-quality	100	AAI-based (high-confidence)	1
RGVC1089	2022NBT-19850	115386	No	125	2	39	High-quality	High-quality	94.3	HMM-based (lower-bound)	1
RGVC1090	2022NBT-19853	115371	No	138	1	47	High-quality	High-quality	100	HMM-based (lower-bound)	1
RGVC1091	2022NBT-19890	115097	No	126	1	70	High-quality	High-quality	100	HMM-based (lower-bound)	1
RGVC1092	2022NBT-199_1	36130	Yes	968	19	616	Medium-quality	Genome-fragment	56.4	HMM-based (lower-bound)	1
RGVC1093	2022NBT-1991	540594	No	515	3	331	High-quality	High-quality	100	HMM-based (lower-bound)	1
RGVC1094	2022NBT-19910	114978	No	120	1	52	High-quality	High-quality	100	HMM-based (lower-bound)	1
RGVC1095	2022NBT-1996	539872	No	479	5	274	High-quality	High-quality	100	HMM-based (lower-bound)	1
RGVC1096	2022NBT-1998	539682	No	506	9	323	High-quality	High-quality	100	HMM-based (lower-bound)	1
RGVC1097	2022NBT-19991	114584	No	136	29	5	Medium-quality	Genome-fragment	75.43	AAI-based (high-confidence)	1.04
RGVC1098	2022NBT-2	996576	No	863	6	640	High-quality	High-quality	100	HMM-based (lower-bound)	1
RGVC1099	2022NBT-20	988620	No	786	4	463	High-quality	High-quality	98.28	HMM-based (lower-bound)	1
RGVC1100	2022NBT-2000_1	75240	Yes	495	14	296	Medium-quality	Genome-fragment	88.08	HMM-based (lower-bound)	1
RGVC1101	2022NBT-2002	539295	No	552	1	368	High-quality	High-quality	100	HMM-based (lower-bound)	1
RGVC1102	2022NBT-20043	114285	No	163	11	20	High-quality	High-quality	99.02	HMM-based (lower-bound)	1
RGVC1103	2022NBT-20053	114255	No	129	5	28	Medium-quality	Genome-fragment	72.19	HMM-based (lower-bound)	1
RGVC1104	2022NBT-2006_1	43801	Yes	503	7	257	Medium-quality	Genome-fragment	65.35	HMM-based (lower-bound)	1
RGVC1105	2022NBT-20070	114128	No	131	2	54	Medium-quality	Genome-fragment	82.71	HMM-based (lower-bound)	1
RGVC1106	2022NBT-20095	113995	No	151	38	3	High-quality	High-quality	96.33	AAI-based (medium-confidence)	1
RGVC1107	2022NBT-2010_2	40106	Yes	61	11	0	High-quality	High-quality	100	AAI-based (high-confidence)	1
RGVC1108	2022NBT-20104	113920	No	156	5	27	High-quality	High-quality	100	HMM-based (lower-bound)	1
RGVC1109	2022NBT-20114	113870	No	225	16	26	High-quality	High-quality	99.74	HMM-based (lower-bound)	1
RGVC1110	2022NBT-20125	113811	No	182	1	63	High-quality	High-quality	100	HMM-based (lower-bound)	1
RGVC1111	2022NBT-2014	538163	No	463	3	300	High-quality	High-quality	100	HMM-based (lower-bound)	1
RGVC1112	2022NBT-20146	113710	No	127	1	34	High-quality	High-quality	100	HMM-based (lower-bound)	1
RGVC1113	2022NBT-20147	113703	No	105	3	34	Medium-quality	Genome-fragment	79.4	HMM-based (lower-bound)	1
RGVC1114	2022NBT-20151	113691	No	122	6	26	Medium-quality	Genome-fragment	84.94	HMM-based (lower-bound)	1
RGVC1115	2022NBT-2016	538054	No	635	5	344	High-quality	High-quality	100	HMM-based (lower-bound)	1
RGVC1116	2022NBT-20173	113628	No	208	2	33	Medium-quality	Genome-fragment	77.41	HMM-based (lower-bound)	1
RGVC1117	2022NBT-202	915450	No	912	5	660	High-quality	High-quality	100	HMM-based (lower-bound)	1
RGVC1118	2022NBT-20215	113458	No	161	7	101	High-quality	High-quality	98.64	HMM-based (lower-bound)	1
RGVC1119	2022NBT-20237_1	72985	Yes	153	25	32	High-quality	High-quality	100	AAI-based (high-confidence)	1
RGVC1120	2022NBT-2024	537364	No	711	8	332	High-quality	High-quality	98.96	HMM-based (lower-bound)	1
RGVC1121	2022NBT-20246	113315	No	143	25	11	High-quality	High-quality	100	AAI-based (high-confidence)	1
RGVC1122	2022NBT-20260	113251	No	131	2	85	High-quality	High-quality	100	HMM-based (lower-bound)	1
RGVC1123	2022NBT-2028	537226	No	526	3	349	High-quality	High-quality	100	HMM-based (lower-bound)	1
RGVC1124	2022NBT-203	914781	No	767	5	554	High-quality	High-quality	100	HMM-based (lower-bound)	1
RGVC1125	2022NBT-20300_1	76745	Yes	122	26	17	Complete	High-quality	100	Provirus (high-confidence)	1
RGVC1126	2022NBT-2031	536831	No	573	2	315	High-quality	High-quality	100	HMM-based (lower-bound)	1
RGVC1127	2022NBT-20344	112843	No	204	2	46	Medium-quality	Genome-fragment	59.41	HMM-based (lower-bound)	1
RGVC1128	2022NBT-2036	536060	No	673	9	371	High-quality	High-quality	100	HMM-based (lower-bound)	1
RGVC1129	2022NBT-2037	535766	No	612	4	301	High-quality	High-quality	100	HMM-based (lower-bound)	1
RGVC1130	2022NBT-20377	112639	No	166	2	58	High-quality	High-quality	100	HMM-based (lower-bound)	1
RGVC1131	2022NBT-2038	535541	No	660	17	353	High-quality	High-quality	100	HMM-based (lower-bound)	1
RGVC1132	2022NBT-20398	112540	No	145	7	33	High-quality	High-quality	95.82	HMM-based (lower-bound)	1
RGVC1133	2022NBT-204_2	28828	Yes	50	11	1	Medium-quality	Genome-fragment	79.95	AAI-based (medium-confidence)	1
RGVC1134	2022NBT-20405	112518	No	166	3	23	High-quality	High-quality	92.05	HMM-based (lower-bound)	1
RGVC1135	2022NBT-20407_2	20233	Yes	42	11	0	Medium-quality	Genome-fragment	62.37	AAI-based (medium-confidence)	1
RGVC1136	2022NBT-20453	112249	No	123	5	48	High-quality	High-quality	100	HMM-based (lower-bound)	1
RGVC1137	2022NBT-20463_1	77930	Yes	103	23	11	Complete	High-quality	100	Provirus (high-confidence)	1
RGVC1138	2022NBT-20464	112195	No	130	7	74	Medium-quality	Genome-fragment	84.01	HMM-based (lower-bound)	1
RGVC1139	2022NBT-2047	535004	No	475	7	290	High-quality	High-quality	100	HMM-based (lower-bound)	1
RGVC1140	2022NBT-20473	112148	No	170	7	11	High-quality	High-quality	100	AAI-based (high-confidence)	1
RGVC1141	2022NBT-20479_1	54255	Yes	160	9	44	Complete	High-quality	100	Provirus (medium-confidence)	1
RGVC1142	2022NBT-20483	112103	No	109	3	52	High-quality	High-quality	97.87	HMM-based (lower-bound)	1.02
RGVC1143	2022NBT-205	914486	No	766	2	484	High-quality	High-quality	100	HMM-based (lower-bound)	1
RGVC1144	2022NBT-2050	534864	No	478	1	277	High-quality	High-quality	100	HMM-based (lower-bound)	1
RGVC1145	2022NBT-20521_1	92645	Yes	134	14	23	High-quality	High-quality	98.47	HMM-based (lower-bound)	1
RGVC1146	2022NBT-2053	534119	No	682	2	360	High-quality	High-quality	100	HMM-based (lower-bound)	1
RGVC1147	2022NBT-2055	534041	No	426	5	292	High-quality	High-quality	100	HMM-based (lower-bound)	1
RGVC1148	2022NBT-20550	111834	No	127	1	16	High-quality	High-quality	100	HMM-based (lower-bound)	1
RGVC1149	2022NBT-2056	533904	No	451	8	300	High-quality	High-quality	100	HMM-based (lower-bound)	1
RGVC1150	2022NBT-20567_1	76449	Yes	171	16	32	High-quality	High-quality	92	HMM-based (lower-bound)	1
RGVC1151	2022NBT-2057	533771	No	508	5	332	High-quality	High-quality	100	HMM-based (lower-bound)	1
RGVC1152	2022NBT-20570_1	32978	Yes	152	16	41	Medium-quality	Genome-fragment	71.16	AAI-based (high-confidence)	1
RGVC1153	2022NBT-2058	533738	No	453	8	306	High-quality	High-quality	100	HMM-based (lower-bound)	1
RGVC1154	2022NBT-20599	111598	No	237	1	48	High-quality	High-quality	100	HMM-based (lower-bound)	1
RGVC1155	2022NBT-20609	111526	No	96	3	68	High-quality	High-quality	95.95	HMM-based (lower-bound)	1
RGVC1156	2022NBT-2061	533568	No	506	8	282	High-quality	High-quality	100	HMM-based (lower-bound)	1
RGVC1157	2022NBT-20611	111525	No	167	3	43	High-quality	High-quality	100	HMM-based (lower-bound)	1
RGVC1158	2022NBT-2062	533559	No	659	12	401	High-quality	High-quality	100	HMM-based (lower-bound)	1
RGVC1159	2022NBT-20639	111347	No	105	2	61	Medium-quality	Genome-fragment	68.32	HMM-based (lower-bound)	1
RGVC1160	2022NBT-2064	533347	No	501	7	306	High-quality	High-quality	100	HMM-based (lower-bound)	1
RGVC1161	2022NBT-20666	111250	No	135	26	4	High-quality	High-quality	95	AAI-based (medium-confidence)	1
RGVC1162	2022NBT-20668	111245	No	151	2	56	High-quality	High-quality	99.68	HMM-based (lower-bound)	1
RGVC1163	2022NBT-2067_1	238613	Yes	792	46	247	High-quality	High-quality	97.62	HMM-based (lower-bound)	1
RGVC1164	2022NBT-2068	532505	No	764	4	366	High-quality	High-quality	100	HMM-based (lower-bound)	1
RGVC1165	2022NBT-20681	111208	No	117	7	8	Medium-quality	Genome-fragment	71.57	HMM-based (lower-bound)	1
RGVC1166	2022NBT-2069	532499	No	473	1	317	High-quality	High-quality	100	HMM-based (lower-bound)	1
RGVC1167	2022NBT-20693	111170	No	133	16	4	High-quality	High-quality	100	AAI-based (high-confidence)	1
RGVC1168	2022NBT-20699	111156	No	148	31	4	High-quality	High-quality	94.04	AAI-based (medium-confidence)	1
RGVC1169	2022NBT-20720	111042	No	132	35	4	High-quality	High-quality	95.37	AAI-based (medium-confidence)	1
RGVC1170	2022NBT-20725	111034	No	175	32	3	High-quality	High-quality	100	AAI-based (high-confidence)	1
RGVC1171	2022NBT-20729	111018	No	118	2	54	Medium-quality	Genome-fragment	74	HMM-based (lower-bound)	1
RGVC1172	2022NBT-2073	532214	No	525	3	370	High-quality	High-quality	100	HMM-based (lower-bound)	1
RGVC1173	2022NBT-20747	110948	No	110	2	60	Medium-quality	Genome-fragment	81.62	HMM-based (lower-bound)	1
RGVC1174	2022NBT-2079	531891	No	537	1	399	High-quality	High-quality	100	HMM-based (lower-bound)	1
RGVC1175	2022NBT-20792	110729	No	115	2	28	Medium-quality	Genome-fragment	87.04	HMM-based (lower-bound)	1
RGVC1176	2022NBT-20794	110710	No	183	1	39	High-quality	High-quality	100	HMM-based (lower-bound)	1
RGVC1177	2022NBT-20804	110651	No	120	5	39	High-quality	High-quality	95.92	HMM-based (lower-bound)	1
RGVC1178	2022NBT-2087	531271	No	467	1	318	Medium-quality	Genome-fragment	82.33	HMM-based (lower-bound)	1
RGVC1179	2022NBT-20877	110300	No	204	6	0	Medium-quality	Genome-fragment	58.09	HMM-based (lower-bound)	1
RGVC1180	2022NBT-20892	110244	No	195	2	88	High-quality	High-quality	100	HMM-based (lower-bound)	1
RGVC1181	2022NBT-2092	530449	No	560	1	336	High-quality	High-quality	100	HMM-based (lower-bound)	1
RGVC1182	2022NBT-20922	110094	No	173	11	0	Medium-quality	Genome-fragment	64.58	AAI-based (high-confidence)	1
RGVC1183	2022NBT-20925_1	43045	Yes	151	4	38	Medium-quality	Genome-fragment	83.39	HMM-based (lower-bound)	1
RGVC1184	2022NBT-20934	110046	No	98	1	52	Medium-quality	Genome-fragment	59.69	HMM-based (lower-bound)	1
RGVC1185	2022NBT-20938	110028	No	104	4	45	Medium-quality	Genome-fragment	78.09	HMM-based (lower-bound)	1
RGVC1186	2022NBT-20985_1	67878	Yes	149	29	22	High-quality	High-quality	100	AAI-based (high-confidence)	1
RGVC1187	2022NBT-20990	109831	No	150	3	32	Medium-quality	Genome-fragment	78.96	HMM-based (lower-bound)	1
RGVC1188	2022NBT-21	988187	No	885	4	675	High-quality	High-quality	100	HMM-based (lower-bound)	1
RGVC1189	2022NBT-210	913381	No	963	1	526	High-quality	High-quality	100	HMM-based (lower-bound)	1
RGVC1190	2022NBT-21018	109751	No	139	32	3	High-quality	High-quality	92.88	AAI-based (medium-confidence)	1
RGVC1191	2022NBT-21045	109637	No	104	2	42	Medium-quality	Genome-fragment	72.2	HMM-based (lower-bound)	1
RGVC1192	2022NBT-2105_1	39877	Yes	526	30	322	Medium-quality	Genome-fragment	63.51	HMM-based (lower-bound)	1.02
RGVC1193	2022NBT-2109	529277	No	499	7	342	High-quality	High-quality	100	HMM-based (lower-bound)	1
RGVC1194	2022NBT-211	912603	No	837	6	594	High-quality	High-quality	100	HMM-based (lower-bound)	1
RGVC1195	2022NBT-21125	109253	No	148	2	53	High-quality	High-quality	100	HMM-based (lower-bound)	1
RGVC1196	2022NBT-2113_1	47047	Yes	532	11	239	Medium-quality	Genome-fragment	63.64	HMM-based (lower-bound)	1
RGVC1197	2022NBT-2114_1	44663	Yes	498	10	365	Medium-quality	Genome-fragment	56.72	HMM-based (lower-bound)	1
RGVC1198	2022NBT-21145	109158	No	129	7	15	High-quality	High-quality	100	AAI-based (medium-confidence)	1
RGVC1199	2022NBT-21174_1	39516	Yes	107	25	34	Complete	High-quality	100	Provirus (medium-confidence)	1
RGVC1200	2022NBT-21179_1	45523	Yes	136	15	41	High-quality	High-quality	99.66	AAI-based (high-confidence)	1
RGVC1201	2022NBT-21186	108968	No	88	3	61	High-quality	High-quality	99.54	HMM-based (lower-bound)	1
RGVC1202	2022NBT-21206	108900	No	111	2	53	High-quality	High-quality	100	HMM-based (lower-bound)	1
RGVC1203	2022NBT-2121	527881	No	552	16	381	High-quality	High-quality	100	HMM-based (lower-bound)	1
RGVC1204	2022NBT-21215	108859	No	198	9	36	High-quality	High-quality	98.64	HMM-based (lower-bound)	1
RGVC1205	2022NBT-2124	527762	No	509	9	293	High-quality	High-quality	100	HMM-based (lower-bound)	1
RGVC1206	2022NBT-21289	108572	No	159	1	58	High-quality	High-quality	100	HMM-based (lower-bound)	1
RGVC1207	2022NBT-21295	108560	No	149	24	4	Medium-quality	Genome-fragment	76.98	AAI-based (high-confidence)	1
RGVC1208	2022NBT-21313_1	41398	Yes	140	4	35	Medium-quality	Genome-fragment	59.54	HMM-based (lower-bound)	1
RGVC1209	2022NBT-2133	526900	No	506	2	329	High-quality	High-quality	100	HMM-based (lower-bound)	1
RGVC1210	2022NBT-21354	108292	No	160	9	60	High-quality	High-quality	97.36	HMM-based (lower-bound)	1
RGVC1211	2022NBT-21362	108255	No	138	3	59	High-quality	High-quality	93.76	HMM-based (lower-bound)	1
RGVC1212	2022NBT-214	911811	No	886	9	644	High-quality	High-quality	100	HMM-based (lower-bound)	1
RGVC1213	2022NBT-2141	526322	No	556	7	265	High-quality	High-quality	100	HMM-based (lower-bound)	1
RGVC1214	2022NBT-21419	107936	No	120	2	17	Medium-quality	Genome-fragment	58.37	HMM-based (lower-bound)	1
RGVC1215	2022NBT-21424	107910	No	120	14	0	High-quality	High-quality	100	AAI-based (high-confidence)	1
RGVC1216	2022NBT-21437	107882	No	99	1	49	High-quality	High-quality	100	HMM-based (lower-bound)	1
RGVC1217	2022NBT-21464	107734	No	138	4	7	Medium-quality	Genome-fragment	66.03	HMM-based (lower-bound)	1
RGVC1218	2022NBT-2147_1	33650	Yes	731	16	304	Medium-quality	Genome-fragment	56.16	HMM-based (lower-bound)	1
RGVC1219	2022NBT-2148	525573	No	426	2	294	High-quality	High-quality	100	HMM-based (lower-bound)	1
RGVC1220	2022NBT-2151	525180	No	632	1	313	High-quality	High-quality	100	HMM-based (lower-bound)	1
RGVC1221	2022NBT-21516	107571	No	121	14	16	High-quality	High-quality	100	AAI-based (medium-confidence)	1
RGVC1222	2022NBT-2152	525126	No	534	10	372	High-quality	High-quality	100	HMM-based (lower-bound)	1
RGVC1223	2022NBT-21520	107552	No	102	4	55	Medium-quality	Genome-fragment	73.16	HMM-based (lower-bound)	1
RGVC1224	2022NBT-21527	107527	No	125	1	57	Medium-quality	Genome-fragment	79.17	HMM-based (lower-bound)	1
RGVC1225	2022NBT-21545	107440	No	115	1	58	High-quality	High-quality	100	HMM-based (lower-bound)	1
RGVC1226	2022NBT-21548	107428	No	167	10	23	High-quality	High-quality	98.32	HMM-based (lower-bound)	1
RGVC1227	2022NBT-2155	524810	No	518	2	289	High-quality	High-quality	100	HMM-based (lower-bound)	1
RGVC1228	2022NBT-21556	107400	No	143	1	80	High-quality	High-quality	100	HMM-based (lower-bound)	1
RGVC1229	2022NBT-21569	107342	No	156	30	2	Medium-quality	Genome-fragment	72.49	AAI-based (high-confidence)	1
RGVC1230	2022NBT-21570	107331	No	163	3	39	Medium-quality	Genome-fragment	89.77	HMM-based (lower-bound)	1
RGVC1231	2022NBT-21581	107286	No	127	3	46	High-quality	High-quality	100	HMM-based (lower-bound)	1
RGVC1232	2022NBT-21595_1	27686	Yes	99	2	42	Medium-quality	Genome-fragment	55.55	AAI-based (medium-confidence)	1
RGVC1233	2022NBT-21599_1	42549	Yes	133	13	38	High-quality	High-quality	97.42	AAI-based (high-confidence)	1
RGVC1234	2022NBT-216	911563	No	1184	3	583	High-quality	High-quality	100	HMM-based (lower-bound)	1
RGVC1235	2022NBT-21620	107131	No	162	16	13	High-quality	High-quality	100	AAI-based (high-confidence)	1
RGVC1236	2022NBT-2163_1	42777	Yes	582	17	253	Medium-quality	Genome-fragment	56.62	HMM-based (lower-bound)	1
RGVC1237	2022NBT-21637	107022	No	169	35	1	High-quality	High-quality	98.85	AAI-based (medium-confidence)	1
RGVC1238	2022NBT-21639	107009	No	126	2	59	High-quality	High-quality	100	HMM-based (lower-bound)	1
RGVC1239	2022NBT-21665	106884	No	122	1	74	Medium-quality	Genome-fragment	68.81	HMM-based (lower-bound)	1
RGVC1240	2022NBT-21680	106805	No	120	3	60	Medium-quality	Genome-fragment	86.13	HMM-based (lower-bound)	1
RGVC1241	2022NBT-21755	106448	No	181	1	58	High-quality	High-quality	95.31	HMM-based (lower-bound)	1
RGVC1242	2022NBT-21762_1	36782	Yes	166	8	38	Complete	High-quality	100	Provirus (high-confidence)	1
RGVC1243	2022NBT-21780	106339	No	102	16	0	High-quality	High-quality	100	AAI-based (medium-confidence)	1
RGVC1244	2022NBT-21793	106266	No	175	18	0	Complete	High-quality	100	DTR (high-confidence)	1
RGVC1245	2022NBT-218	910998	No	974	5	530	High-quality	High-quality	100	HMM-based (lower-bound)	1
RGVC1246	2022NBT-21822	106142	No	101	8	0	High-quality	High-quality	100	AAI-based (high-confidence)	1
RGVC1247	2022NBT-21874	105895	No	136	3	16	High-quality	High-quality	93.15	HMM-based (lower-bound)	1
RGVC1248	2022NBT-21878	105882	No	198	48	1	High-quality	High-quality	100	AAI-based (high-confidence)	1.04
RGVC1249	2022NBT-21883	105861	No	161	2	40	High-quality	High-quality	100	HMM-based (lower-bound)	1
RGVC1250	2022NBT-219	910906	No	836	1	414	High-quality	High-quality	100	HMM-based (lower-bound)	1
RGVC1251	2022NBT-21907	105764	No	115	1	24	High-quality	High-quality	100	HMM-based (lower-bound)	1
RGVC1252	2022NBT-21909	105759	No	137	1	47	Medium-quality	Genome-fragment	85.73	HMM-based (lower-bound)	1
RGVC1253	2022NBT-21915	105729	No	105	1	68	High-quality	High-quality	100	HMM-based (lower-bound)	1
RGVC1254	2022NBT-21922	105691	No	97	2	51	High-quality	High-quality	100	HMM-based (lower-bound)	1
RGVC1255	2022NBT-21928_1	33790	Yes	119	16	33	High-quality	High-quality	100	AAI-based (high-confidence)	1
RGVC1256	2022NBT-2194	521177	No	482	2	327	High-quality	High-quality	100	HMM-based (lower-bound)	1
RGVC1257	2022NBT-21942	105584	No	203	2	40	High-quality	High-quality	94.12	HMM-based (lower-bound)	1
RGVC1258	2022NBT-2195_1	68907	Yes	536	26	317	High-quality	High-quality	90.51	HMM-based (lower-bound)	1
RGVC1259	2022NBT-21956_1	89139	Yes	131	34	19	Complete	High-quality	100	Provirus (high-confidence)	1
RGVC1260	2022NBT-21978	105455	No	154	3	0	Medium-quality	Genome-fragment	77.63	AAI-based (high-confidence)	1
RGVC1261	2022NBT-21982_1	55854	Yes	129	22	21	Complete	High-quality	100	Provirus (high-confidence)	1
RGVC1262	2022NBT-21990	105411	No	116	1	42	High-quality	High-quality	100	HMM-based (lower-bound)	1
RGVC1263	2022NBT-21994	105402	No	137	8	2	High-quality	High-quality	95.22	AAI-based (medium-confidence)	1
RGVC1264	2022NBT-22	988070	No	922	3	631	High-quality	High-quality	100	HMM-based (lower-bound)	1
RGVC1265	2022NBT-2202	520622	No	557	1	347	High-quality	High-quality	100	HMM-based (lower-bound)	1.02
RGVC1266	2022NBT-22028_1	43155	Yes	158	2	33	High-quality	High-quality	94.79	HMM-based (lower-bound)	1
RGVC1267	2022NBT-22031	105218	No	188	1	38	Medium-quality	Genome-fragment	60.54	HMM-based (lower-bound)	1
RGVC1268	2022NBT-22034	105209	No	169	1	45	High-quality	High-quality	100	HMM-based (lower-bound)	1
RGVC1269	2022NBT-22055	105138	No	144	4	7	Medium-quality	Genome-fragment	89	HMM-based (lower-bound)	1
RGVC1270	2022NBT-22057_1	38263	Yes	142	22	51	Medium-quality	Genome-fragment	57.97	HMM-based (lower-bound)	1
RGVC1271	2022NBT-2207	520020	No	759	1	399	High-quality	High-quality	100	HMM-based (lower-bound)	1
RGVC1272	2022NBT-22092	104996	No	131	4	17	High-quality	High-quality	100	AAI-based (high-confidence)	1
RGVC1273	2022NBT-22097	104983	No	138	21	1	Complete	High-quality	100	DTR (high-confidence)	1
RGVC1274	2022NBT-22106	104938	No	169	8	7	High-quality	High-quality	95.04	HMM-based (lower-bound)	1
RGVC1275	2022NBT-2211	519538	No	513	3	323	High-quality	High-quality	100	HMM-based (lower-bound)	1.01
RGVC1276	2022NBT-22111	104919	No	116	2	24	High-quality	High-quality	100	HMM-based (lower-bound)	1
RGVC1277	2022NBT-22118_1	84839	Yes	121	16	15	High-quality	High-quality	100	AAI-based (medium-confidence)	1
RGVC1278	2022NBT-2214	519285	No	498	5	309	High-quality	High-quality	100	HMM-based (lower-bound)	1
RGVC1279	2022NBT-22141_1	66532	Yes	131	14	18	Medium-quality	Genome-fragment	67.77	HMM-based (lower-bound)	1
RGVC1280	2022NBT-2218	518665	No	483	1	262	High-quality	High-quality	100	HMM-based (lower-bound)	1
RGVC1281	2022NBT-222	910004	No	869	2	657	High-quality	High-quality	100	HMM-based (lower-bound)	1
RGVC1282	2022NBT-2220	518351	No	445	2	287	High-quality	High-quality	100	HMM-based (lower-bound)	1
RGVC1283	2022NBT-22201	104487	No	128	3	22	High-quality	High-quality	92.01	HMM-based (lower-bound)	1
RGVC1284	2022NBT-2224	518038	No	562	5	276	Medium-quality	Genome-fragment	65.14	HMM-based (lower-bound)	1
RGVC1285	2022NBT-22244_1	68672	Yes	162	14	17	High-quality	High-quality	93.49	HMM-based (lower-bound)	1
RGVC1286	2022NBT-22248	104253	No	88	1	18	Medium-quality	Genome-fragment	71.77	HMM-based (lower-bound)	1
RGVC1287	2022NBT-2227	517689	No	463	4	311	High-quality	High-quality	100	HMM-based (lower-bound)	1
RGVC1288	2022NBT-22280_1	97422	Yes	122	5	24	Medium-quality	Genome-fragment	85.6	HMM-based (lower-bound)	1
RGVC1289	2022NBT-22297	104035	No	110	2	76	Medium-quality	Genome-fragment	67.27	HMM-based (lower-bound)	1
RGVC1290	2022NBT-22300	104021	No	103	18	0	High-quality	High-quality	100	AAI-based (medium-confidence)	1
RGVC1291	2022NBT-22306	104004	No	168	17	0	Complete	High-quality	100	DTR (high-confidence)	1
RGVC1292	2022NBT-22311	103962	No	137	27	3	Medium-quality	Genome-fragment	60.14	HMM-based (lower-bound)	1
RGVC1293	2022NBT-22314	103954	No	124	3	32	Medium-quality	Genome-fragment	69.46	HMM-based (lower-bound)	1
RGVC1294	2022NBT-22319_1	54415	Yes	136	21	23	Medium-quality	Genome-fragment	83.11	HMM-based (lower-bound)	1
RGVC1295	2022NBT-22323	103915	No	103	1	59	Medium-quality	Genome-fragment	55.63	HMM-based (lower-bound)	1
RGVC1296	2022NBT-22341	103840	No	129	4	4	High-quality	High-quality	100	AAI-based (medium-confidence)	1
RGVC1297	2022NBT-2235	516950	No	530	2	338	High-quality	High-quality	100	HMM-based (lower-bound)	1
RGVC1298	2022NBT-22360	103744	No	122	5	20	High-quality	High-quality	91.21	HMM-based (lower-bound)	1
RGVC1299	2022NBT-22362	103741	No	164	16	1	Complete	High-quality	100	DTR (high-confidence)	1
RGVC1300	2022NBT-2238	516412	No	502	1	305	High-quality	High-quality	100	HMM-based (lower-bound)	1
RGVC1301	2022NBT-2239	516303	No	511	4	312	High-quality	High-quality	100	HMM-based (lower-bound)	1
RGVC1302	2022NBT-224_1	41844	Yes	770	20	534	Medium-quality	Genome-fragment	62.87	HMM-based (lower-bound)	1
RGVC1303	2022NBT-2242	515965	No	576	2	190	High-quality	High-quality	100	HMM-based (lower-bound)	1.01
RGVC1304	2022NBT-22441	103426	No	123	22	12	High-quality	High-quality	100	AAI-based (high-confidence)	1
RGVC1305	2022NBT-22467	103360	No	124	4	57	Medium-quality	Genome-fragment	61.09	HMM-based (lower-bound)	1
RGVC1306	2022NBT-2247	515653	No	514	7	360	High-quality	High-quality	100	HMM-based (lower-bound)	1
RGVC1307	2022NBT-22473	103345	No	130	14	2	High-quality	High-quality	100	AAI-based (high-confidence)	1
RGVC1308	2022NBT-2248	515648	No	485	2	350	High-quality	High-quality	100	HMM-based (lower-bound)	1
RGVC1309	2022NBT-225	909660	No	1125	1	467	High-quality	High-quality	100	HMM-based (lower-bound)	1
RGVC1310	2022NBT-22581	102917	No	93	13	0	Complete	High-quality	100	DTR (high-confidence)	1
RGVC1311	2022NBT-2259	514424	No	448	8	265	High-quality	High-quality	100	HMM-based (lower-bound)	1
RGVC1312	2022NBT-22593	102874	No	126	1	59	High-quality	High-quality	100	HMM-based (lower-bound)	1
RGVC1313	2022NBT-226	909402	No	796	3	477	High-quality	High-quality	100	HMM-based (lower-bound)	1
RGVC1314	2022NBT-2260_1	52770	Yes	443	10	178	Medium-quality	Genome-fragment	79.63	HMM-based (lower-bound)	1
RGVC1315	2022NBT-22604	102818	No	99	2	19	Medium-quality	Genome-fragment	85.79	HMM-based (lower-bound)	1
RGVC1316	2022NBT-2264	514057	No	504	6	292	High-quality	High-quality	100	HMM-based (lower-bound)	1
RGVC1317	2022NBT-22640_1	33925	Yes	124	19	48	Medium-quality	Genome-fragment	59.52	AAI-based (high-confidence)	1
RGVC1318	2022NBT-22662	102548	No	145	1	69	High-quality	High-quality	100	HMM-based (lower-bound)	1
RGVC1319	2022NBT-22677	102464	No	161	1	70	High-quality	High-quality	100	HMM-based (lower-bound)	1
RGVC1320	2022NBT-22693_1	45186	Yes	133	21	37	High-quality	High-quality	92.6	AAI-based (high-confidence)	1
RGVC1321	2022NBT-22709	102343	No	154	22	4	High-quality	High-quality	100	AAI-based (medium-confidence)	1
RGVC1322	2022NBT-22732	102256	No	151	26	1	Medium-quality	Genome-fragment	77.41	AAI-based (high-confidence)	1
RGVC1323	2022NBT-2274	512918	No	566	4	289	High-quality	High-quality	100	HMM-based (lower-bound)	1
RGVC1324	2022NBT-22745_1	88929	Yes	178	14	14	High-quality	High-quality	90.49	HMM-based (lower-bound)	1
RGVC1325	2022NBT-22771	102120	No	180	1	29	High-quality	High-quality	100	HMM-based (lower-bound)	1
RGVC1326	2022NBT-22808	101943	No	128	1	35	High-quality	High-quality	92.83	HMM-based (lower-bound)	1
RGVC1327	2022NBT-22838	101875	No	119	14	2	Complete	High-quality	100	DTR (high-confidence)	1
RGVC1328	2022NBT-22848	101841	No	155	2	40	High-quality	High-quality	100	HMM-based (lower-bound)	1
RGVC1329	2022NBT-22857	101811	No	109	5	53	Medium-quality	Genome-fragment	82.14	HMM-based (lower-bound)	1
RGVC1330	2022NBT-22859	101806	No	124	8	1	Medium-quality	Genome-fragment	86.74	HMM-based (lower-bound)	1
RGVC1331	2022NBT-22879	101730	No	142	33	2	High-quality	High-quality	100	AAI-based (medium-confidence)	1
RGVC1332	2022NBT-22910	101587	No	107	2	57	High-quality	High-quality	100	HMM-based (lower-bound)	1
RGVC1333	2022NBT-22941	101482	No	211	2	38	Medium-quality	Genome-fragment	78.21	HMM-based (lower-bound)	1
RGVC1334	2022NBT-22955	101422	No	148	12	1	High-quality	High-quality	100	AAI-based (high-confidence)	1.32
RGVC1335	2022NBT-2299	510062	No	589	1	296	High-quality	High-quality	100	HMM-based (lower-bound)	1
RGVC1336	2022NBT-23_1	42885	Yes	1408	11	583	Medium-quality	Genome-fragment	65.79	HMM-based (lower-bound)	1
RGVC1337	2022NBT-2301	509942	No	523	7	280	High-quality	High-quality	100	HMM-based (lower-bound)	1
RGVC1338	2022NBT-23015	101200	No	126	2	56	High-quality	High-quality	96.09	HMM-based (lower-bound)	1
RGVC1339	2022NBT-23022	101181	No	107	19	1	High-quality	High-quality	100	AAI-based (high-confidence)	1
RGVC1340	2022NBT-23026	101177	No	129	1	21	Medium-quality	Genome-fragment	68.01	HMM-based (lower-bound)	1
RGVC1341	2022NBT-2304	509802	No	506	1	322	High-quality	High-quality	100	HMM-based (lower-bound)	1
RGVC1342	2022NBT-23043_1	48755	Yes	130	11	14	Medium-quality	Genome-fragment	59.43	HMM-based (lower-bound)	1
RGVC1343	2022NBT-2306	509633	No	440	4	308	High-quality	High-quality	100	HMM-based (lower-bound)	1
RGVC1344	2022NBT-23065	101001	No	164	17	16	High-quality	High-quality	98.21	HMM-based (lower-bound)	1
RGVC1345	2022NBT-23089	100938	No	162	7	2	High-quality	High-quality	100	AAI-based (medium-confidence)	1.32
RGVC1346	2022NBT-23092	100925	No	117	21	0	High-quality	High-quality	100	AAI-based (medium-confidence)	1
RGVC1347	2022NBT-231	908407	No	801	1	515	High-quality	High-quality	100	HMM-based (lower-bound)	1
RGVC1348	2022NBT-23109	100846	No	154	11	2	High-quality	High-quality	100	AAI-based (high-confidence)	1
RGVC1349	2022NBT-23111	100844	No	118	6	71	High-quality	High-quality	96.84	HMM-based (lower-bound)	1
RGVC1350	2022NBT-2312	509268	No	445	5	283	High-quality	High-quality	100	HMM-based (lower-bound)	1
RGVC1351	2022NBT-23130	100759	No	166	23	8	High-quality	High-quality	100	AAI-based (medium-confidence)	1
RGVC1352	2022NBT-23151_1	31813	Yes	125	19	46	Complete	High-quality	100	Provirus (medium-confidence)	1
RGVC1353	2022NBT-23169_1	43448	Yes	124	9	46	Medium-quality	Genome-fragment	51.47	HMM-based (lower-bound)	1
RGVC1354	2022NBT-23172	100646	No	154	1	53	Medium-quality	Genome-fragment	56.93	HMM-based (lower-bound)	1
RGVC1355	2022NBT-23184	100589	No	149	2	66	High-quality	High-quality	100	HMM-based (lower-bound)	1
RGVC1356	2022NBT-23210	100513	No	115	5	40	Medium-quality	Genome-fragment	86.79	HMM-based (lower-bound)	1
RGVC1357	2022NBT-23216	100492	No	170	1	27	High-quality	High-quality	100	HMM-based (lower-bound)	1
RGVC1358	2022NBT-23229	100438	No	90	2	38	Medium-quality	Genome-fragment	85.46	HMM-based (lower-bound)	1
RGVC1359	2022NBT-2326_2	41812	Yes	63	22	0	Medium-quality	Genome-fragment	88.95	AAI-based (medium-confidence)	1
RGVC1360	2022NBT-23265_1	83264	Yes	139	8	16	High-quality	High-quality	100	AAI-based (high-confidence)	1
RGVC1361	2022NBT-23268	100291	No	173	4	0	High-quality	High-quality	99.01	AAI-based (high-confidence)	1
RGVC1362	2022NBT-23277	100275	No	78	1	37	Medium-quality	Genome-fragment	60.95	HMM-based (lower-bound)	1
RGVC1363	2022NBT-2328	508035	No	417	8	268	High-quality	High-quality	100	HMM-based (lower-bound)	1
RGVC1364	2022NBT-23302_1	57240	Yes	126	19	18	Complete	High-quality	100	Provirus (high-confidence)	1
RGVC1365	2022NBT-23312	100125	No	118	26	3	Medium-quality	Genome-fragment	63.6	AAI-based (high-confidence)	1
RGVC1366	2022NBT-23320	100089	No	181	14	0	Medium-quality	Genome-fragment	57.91	HMM-based (lower-bound)	1
RGVC1367	2022NBT-23323	100077	No	95	1	52	Medium-quality	Genome-fragment	57.68	HMM-based (lower-bound)	1
RGVC1368	2022NBT-23328_1	32961	Yes	106	19	41	Medium-quality	Genome-fragment	58.01	HMM-based (lower-bound)	1
RGVC1369	2022NBT-23350_1	62954	Yes	124	13	30	Complete	High-quality	100	Provirus (high-confidence)	1
RGVC1370	2022NBT-23359	99975	No	137	7	21	Medium-quality	Genome-fragment	64.67	HMM-based (lower-bound)	1
RGVC1371	2022NBT-2337	507569	No	428	2	266	High-quality	High-quality	100	HMM-based (lower-bound)	1
RGVC1372	2022NBT-23376	99931	No	132	4	55	High-quality	High-quality	97.23	HMM-based (lower-bound)	1
RGVC1373	2022NBT-2339	507494	No	482	2	336	High-quality	High-quality	100	HMM-based (lower-bound)	1
RGVC1374	2022NBT-23400	99843	No	147	2	41	Medium-quality	Genome-fragment	69.95	HMM-based (lower-bound)	1
RGVC1375	2022NBT-23408	99818	No	109	1	44	High-quality	High-quality	100	HMM-based (lower-bound)	1
RGVC1376	2022NBT-23446	99667	No	108	2	46	Medium-quality	Genome-fragment	73.36	HMM-based (lower-bound)	1
RGVC1377	2022NBT-23452	99656	No	167	7	32	High-quality	High-quality	93.13	HMM-based (lower-bound)	1
RGVC1378	2022NBT-2349	506695	No	550	9	315	High-quality	High-quality	100	HMM-based (lower-bound)	1
RGVC1379	2022NBT-23497_1	39587	Yes	99	24	14	Medium-quality	Genome-fragment	52.52	HMM-based (lower-bound)	1
RGVC1380	2022NBT-2350	506692	No	478	6	231	High-quality	High-quality	100	HMM-based (lower-bound)	1
RGVC1381	2022NBT-23506	99444	No	105	9	2	High-quality	High-quality	93.41	HMM-based (lower-bound)	1
RGVC1382	2022NBT-23521	99382	No	106	37	0	High-quality	High-quality	98.53	AAI-based (high-confidence)	1
RGVC1383	2022NBT-23522	99376	No	102	17	0	High-quality	High-quality	97.94	AAI-based (high-confidence)	1
RGVC1384	2022NBT-23531_1	31920	Yes	132	15	36	Medium-quality	Genome-fragment	53.28	HMM-based (lower-bound)	1
RGVC1385	2022NBT-23532	99362	No	162	5	39	High-quality	High-quality	96.77	HMM-based (lower-bound)	1
RGVC1386	2022NBT-23567_1	29395	Yes	116	22	37	Medium-quality	Genome-fragment	63.86	AAI-based (high-confidence)	1
RGVC1387	2022NBT-23595	99141	No	106	2	36	Medium-quality	Genome-fragment	64.77	HMM-based (lower-bound)	1
RGVC1388	2022NBT-2360	505337	No	543	4	336	High-quality	High-quality	100	HMM-based (lower-bound)	1
RGVC1389	2022NBT-23621_1	29322	Yes	129	12	51	Medium-quality	Genome-fragment	67.56	AAI-based (medium-confidence)	1
RGVC1390	2022NBT-23631	99041	No	117	3	68	Medium-quality	Genome-fragment	55.69	HMM-based (lower-bound)	1
RGVC1391	2022NBT-23676	98842	No	136	3	30	High-quality	High-quality	100	HMM-based (lower-bound)	1
RGVC1392	2022NBT-2369	504597	No	472	5	320	High-quality	High-quality	100	HMM-based (lower-bound)	1
RGVC1393	2022NBT-23693_1	49824	Yes	203	7	35	Medium-quality	Genome-fragment	81.92	HMM-based (lower-bound)	1
RGVC1394	2022NBT-237_1	44738	Yes	838	38	500	Medium-quality	Genome-fragment	77.22	HMM-based (lower-bound)	1
RGVC1395	2022NBT-2375	504186	No	521	3	287	High-quality	High-quality	100	HMM-based (lower-bound)	1
RGVC1396	2022NBT-23753	98509	No	84	1	33	Medium-quality	Genome-fragment	56.78	HMM-based (lower-bound)	1
RGVC1397	2022NBT-23767	98468	No	142	25	2	Medium-quality	Genome-fragment	83.18	AAI-based (high-confidence)	1
RGVC1398	2022NBT-23769	98461	No	138	8	0	Medium-quality	Genome-fragment	88.6	HMM-based (lower-bound)	1
RGVC1399	2022NBT-23783	98408	No	104	17	3	High-quality	High-quality	96.05	AAI-based (high-confidence)	1
RGVC1400	2022NBT-238_1	36946	Yes	812	27	467	Medium-quality	Genome-fragment	53.81	HMM-based (lower-bound)	1
RGVC1401	2022NBT-2382	503536	No	730	8	288	High-quality	High-quality	100	HMM-based (lower-bound)	1
RGVC1402	2022NBT-23849	98235	No	199	21	2	Medium-quality	Genome-fragment	64.3	AAI-based (high-confidence)	1
RGVC1403	2022NBT-23866	98177	No	88	3	59	High-quality	High-quality	97.42	HMM-based (lower-bound)	1
RGVC1404	2022NBT-23875	98141	No	198	8	26	High-quality	High-quality	91.3	HMM-based (lower-bound)	1
RGVC1405	2022NBT-2388	503227	No	489	4	364	High-quality	High-quality	100	HMM-based (lower-bound)	1
RGVC1406	2022NBT-23913	97985	No	149	1	57	High-quality	High-quality	100	HMM-based (lower-bound)	1
RGVC1407	2022NBT-23919_1	38961	Yes	116	9	36	Medium-quality	Genome-fragment	66.04	HMM-based (lower-bound)	1
RGVC1408	2022NBT-23920	97969	No	114	1	48	High-quality	High-quality	100	HMM-based (lower-bound)	1
RGVC1409	2022NBT-23925	97960	No	89	3	36	High-quality	High-quality	94.79	HMM-based (lower-bound)	1
RGVC1410	2022NBT-2394	502738	No	458	5	270	High-quality	High-quality	100	HMM-based (lower-bound)	1
RGVC1411	2022NBT-2395	502736	No	625	2	302	High-quality	High-quality	100	HMM-based (lower-bound)	1
RGVC1412	2022NBT-2396	502695	No	500	11	303	High-quality	High-quality	100	HMM-based (lower-bound)	1
RGVC1413	2022NBT-23962_1	36317	Yes	138	10	52	Complete	High-quality	100	Provirus (high-confidence)	1
RGVC1414	2022NBT-23998	97702	No	90	1	47	Medium-quality	Genome-fragment	78.4	HMM-based (lower-bound)	1
RGVC1415	2022NBT-24	987023	No	848	6	632	High-quality	High-quality	100	HMM-based (lower-bound)	1
RGVC1416	2022NBT-24002	97688	No	112	1	40	Medium-quality	Genome-fragment	67.25	HMM-based (lower-bound)	1
RGVC1417	2022NBT-2401	502415	No	532	3	326	High-quality	High-quality	100	HMM-based (lower-bound)	1
RGVC1418	2022NBT-24010_1	33730	Yes	108	16	38	Medium-quality	Genome-fragment	57.09	HMM-based (lower-bound)	1
RGVC1419	2022NBT-24049	97513	No	166	3	54	Medium-quality	Genome-fragment	81.74	HMM-based (lower-bound)	1
RGVC1420	2022NBT-2405	502216	No	455	1	310	High-quality	High-quality	100	HMM-based (lower-bound)	1
RGVC1421	2022NBT-24067	97437	No	102	12	26	Medium-quality	Genome-fragment	88.5	HMM-based (lower-bound)	1
RGVC1422	2022NBT-24073	97428	No	107	3	41	High-quality	High-quality	97.27	HMM-based (lower-bound)	1
RGVC1423	2022NBT-24079	97415	No	160	2	68	High-quality	High-quality	90.73	HMM-based (lower-bound)	1
RGVC1424	2022NBT-24082	97409	No	137	35	1	Medium-quality	Genome-fragment	75.08	AAI-based (medium-confidence)	1
RGVC1425	2022NBT-2409_1	121095	Yes	541	40	250	Complete	High-quality	100	Provirus (high-confidence)	1
RGVC1426	2022NBT-24100	97363	No	146	4	58	High-quality	High-quality	96.76	HMM-based (lower-bound)	1
RGVC1427	2022NBT-2413	501368	No	470	1	316	High-quality	High-quality	100	HMM-based (lower-bound)	1
RGVC1428	2022NBT-24147_1	95877	Yes	191	24	8	High-quality	High-quality	100	AAI-based (high-confidence)	1
RGVC1429	2022NBT-24166_1	56378	Yes	104	4	13	High-quality	High-quality	100	AAI-based (medium-confidence)	1
RGVC1430	2022NBT-24182	97042	No	98	1	56	High-quality	High-quality	100	HMM-based (lower-bound)	1
RGVC1431	2022NBT-24187_1	50340	Yes	167	11	38	Complete	High-quality	100	Provirus (high-confidence)	1
RGVC1432	2022NBT-24198_1	48228	Yes	100	10	27	Medium-quality	Genome-fragment	67.31	HMM-based (lower-bound)	1
RGVC1433	2022NBT-24201_1	63596	Yes	107	25	18	High-quality	High-quality	100	AAI-based (high-confidence)	1
RGVC1434	2022NBT-24226	96910	No	140	8	5	High-quality	High-quality	100	AAI-based (high-confidence)	1
RGVC1435	2022NBT-24228	96906	No	157	8	35	High-quality	High-quality	100	HMM-based (lower-bound)	1
RGVC1436	2022NBT-24243	96826	No	141	1	36	Medium-quality	Genome-fragment	65.09	HMM-based (lower-bound)	1
RGVC1437	2022NBT-24250	96804	No	131	1	18	Medium-quality	Genome-fragment	65.07	HMM-based (lower-bound)	1
RGVC1438	2022NBT-24290	96654	No	88	2	38	Medium-quality	Genome-fragment	86.06	HMM-based (lower-bound)	1
RGVC1439	2022NBT-2430	499536	No	438	3	257	High-quality	High-quality	100	HMM-based (lower-bound)	1
RGVC1440	2022NBT-24322_1	46363	Yes	93	26	22	High-quality	High-quality	98.73	AAI-based (medium-confidence)	1
RGVC1441	2022NBT-24347	96486	No	113	2	38	Medium-quality	Genome-fragment	76.09	HMM-based (lower-bound)	1
RGVC1442	2022NBT-24358	96457	No	95	1	34	Medium-quality	Genome-fragment	61.63	HMM-based (lower-bound)	1
RGVC1443	2022NBT-24390	96373	No	162	18	13	High-quality	High-quality	96.25	HMM-based (lower-bound)	1
RGVC1444	2022NBT-24402	96320	No	78	1	37	Medium-quality	Genome-fragment	64.75	HMM-based (lower-bound)	1
RGVC1445	2022NBT-24416	96269	No	185	2	88	High-quality	High-quality	100	HMM-based (lower-bound)	1
RGVC1446	2022NBT-24426	96241	No	89	2	43	High-quality	High-quality	100	HMM-based (lower-bound)	1
RGVC1447	2022NBT-24444_1	43727	Yes	126	11	45	Medium-quality	Genome-fragment	54.59	HMM-based (lower-bound)	1
RGVC1448	2022NBT-24445_1	38898	Yes	116	21	45	Medium-quality	Genome-fragment	57.85	HMM-based (lower-bound)	1
RGVC1449	2022NBT-24452_1	71740	Yes	128	15	9	High-quality	High-quality	90.76	HMM-based (lower-bound)	1
RGVC1450	2022NBT-24503	95971	No	119	16	2	High-quality	High-quality	100	AAI-based (high-confidence)	1.7
RGVC1451	2022NBT-2451	498081	No	506	5	319	High-quality	High-quality	100	HMM-based (lower-bound)	1
RGVC1452	2022NBT-24529	95862	No	110	3	13	Medium-quality	Genome-fragment	51.9	HMM-based (lower-bound)	1
RGVC1453	2022NBT-2456	497535	No	623	2	377	High-quality	High-quality	100	HMM-based (lower-bound)	1
RGVC1454	2022NBT-24562	95753	No	150	11	1	High-quality	High-quality	94.7	AAI-based (high-confidence)	1
RGVC1455	2022NBT-24579	95720	No	144	1	58	High-quality	High-quality	100	HMM-based (lower-bound)	1
RGVC1456	2022NBT-24586_1	29071	Yes	149	6	44	Medium-quality	Genome-fragment	55.27	HMM-based (lower-bound)	1
RGVC1457	2022NBT-24593_1	35342	Yes	101	17	35	Medium-quality	Genome-fragment	73.66	AAI-based (high-confidence)	1
RGVC1458	2022NBT-246	901900	No	869	12	436	High-quality	High-quality	100	HMM-based (lower-bound)	1
RGVC1459	2022NBT-24623	95586	No	156	22	0	Medium-quality	Genome-fragment	52.76	HMM-based (lower-bound)	1
RGVC1460	2022NBT-24642	95507	No	111	3	43	High-quality	High-quality	100	HMM-based (lower-bound)	1
RGVC1461	2022NBT-24660_1	53995	Yes	113	21	15	High-quality	High-quality	100	AAI-based (medium-confidence)	1
RGVC1462	2022NBT-24661	95419	No	131	2	46	Medium-quality	Genome-fragment	70.44	HMM-based (lower-bound)	1
RGVC1463	2022NBT-2467_1	492074	Yes	456	9	227	High-quality	High-quality	100	HMM-based (lower-bound)	1
RGVC1464	2022NBT-24682	95349	No	138	1	32	High-quality	High-quality	100	HMM-based (lower-bound)	1
RGVC1465	2022NBT-247_1	40679	Yes	921	21	620	Medium-quality	Genome-fragment	67.39	HMM-based (lower-bound)	1
RGVC1466	2022NBT-24740	95162	No	133	1	38	Medium-quality	Genome-fragment	68.11	HMM-based (lower-bound)	1
RGVC1467	2022NBT-24761	95101	No	145	2	63	Medium-quality	Genome-fragment	59.02	HMM-based (lower-bound)	1
RGVC1468	2022NBT-24785	95004	No	119	2	45	High-quality	High-quality	93.17	HMM-based (lower-bound)	1
RGVC1469	2022NBT-24788	94995	No	168	4	22	Medium-quality	Genome-fragment	61.4	HMM-based (lower-bound)	1
RGVC1470	2022NBT-248	901737	No	1168	2	718	High-quality	High-quality	100	HMM-based (lower-bound)	1
RGVC1471	2022NBT-24803	94939	No	75	4	41	Medium-quality	Genome-fragment	89.7	HMM-based (lower-bound)	1
RGVC1472	2022NBT-24804	94937	No	105	2	29	Medium-quality	Genome-fragment	82.07	HMM-based (lower-bound)	1
RGVC1473	2022NBT-2481	495841	No	451	9	281	High-quality	High-quality	100	HMM-based (lower-bound)	1
RGVC1474	2022NBT-24836	94835	No	125	4	32	Medium-quality	Genome-fragment	75.44	HMM-based (lower-bound)	1
RGVC1475	2022NBT-2484	495614	No	479	15	320	High-quality	High-quality	100	HMM-based (lower-bound)	1
RGVC1476	2022NBT-24849_1	54764	Yes	89	11	21	Medium-quality	Genome-fragment	71.05	HMM-based (lower-bound)	1
RGVC1477	2022NBT-24858_1	48737	Yes	100	4	24	Complete	High-quality	100	Provirus (high-confidence)	1
RGVC1478	2022NBT-24865_1	55902	Yes	94	26	17	High-quality	High-quality	100	AAI-based (high-confidence)	1
RGVC1479	2022NBT-249	901667	No	985	10	607	High-quality	High-quality	100	HMM-based (lower-bound)	1
RGVC1480	2022NBT-2492	494727	No	558	2	239	High-quality	High-quality	100	HMM-based (lower-bound)	1
RGVC1481	2022NBT-2494	494677	No	452	3	270	High-quality	High-quality	100	HMM-based (lower-bound)	1
RGVC1482	2022NBT-24955	94399	No	140	1	78	High-quality	High-quality	100	HMM-based (lower-bound)	1
RGVC1483	2022NBT-24985	94284	No	173	2	50	Medium-quality	Genome-fragment	66.26	HMM-based (lower-bound)	1
RGVC1484	2022NBT-24986_1	35105	Yes	100	6	30	Medium-quality	Genome-fragment	78.1	AAI-based (medium-confidence)	1
RGVC1485	2022NBT-2499	494308	No	549	2	331	High-quality	High-quality	100	HMM-based (lower-bound)	1
RGVC1486	2022NBT-25_1	43041	Yes	1006	38	555	Medium-quality	Genome-fragment	66.49	HMM-based (lower-bound)	1
RGVC1487	2022NBT-2500	494303	No	473	6	278	High-quality	High-quality	100	HMM-based (lower-bound)	1
RGVC1488	2022NBT-25017_1	64528	Yes	165	17	22	High-quality	High-quality	100	AAI-based (high-confidence)	1
RGVC1489	2022NBT-25038	94089	No	135	1	35	High-quality	High-quality	100	HMM-based (lower-bound)	1
RGVC1490	2022NBT-2505_1	87112	Yes	435	15	143	High-quality	High-quality	90.77	HMM-based (lower-bound)	1
RGVC1491	2022NBT-25059	93999	No	120	1	32	High-quality	High-quality	100	HMM-based (lower-bound)	1
RGVC1492	2022NBT-25087_1	30822	Yes	151	2	37	Medium-quality	Genome-fragment	66.93	HMM-based (lower-bound)	1
RGVC1493	2022NBT-2516	492640	No	434	3	290	High-quality	High-quality	100	HMM-based (lower-bound)	1
RGVC1494	2022NBT-25172	93630	No	122	10	0	High-quality	High-quality	100	AAI-based (medium-confidence)	1
RGVC1495	2022NBT-25185	93603	No	92	11	0	High-quality	High-quality	96.76	AAI-based (medium-confidence)	1
RGVC1496	2022NBT-25228	93409	No	101	8	0	High-quality	High-quality	100	AAI-based (high-confidence)	1
RGVC1497	2022NBT-25232	93402	No	97	2	84	Medium-quality	Genome-fragment	75.67	HMM-based (lower-bound)	1
RGVC1498	2022NBT-25240_1	63951	Yes	120	15	29	High-quality	High-quality	100	AAI-based (medium-confidence)	1
RGVC1499	2022NBT-25241	93372	No	124	2	22	Medium-quality	Genome-fragment	80.16	HMM-based (lower-bound)	1
RGVC1500	2022NBT-25248	93342	No	122	2	41	High-quality	High-quality	100	HMM-based (lower-bound)	1
RGVC1501	2022NBT-25253	93316	No	98	2	24	Medium-quality	Genome-fragment	73.6	HMM-based (lower-bound)	1
RGVC1502	2022NBT-25257	93303	No	121	2	30	High-quality	High-quality	100	HMM-based (lower-bound)	1
RGVC1503	2022NBT-25259	93291	No	87	2	52	High-quality	High-quality	100	HMM-based (lower-bound)	1
RGVC1504	2022NBT-25266	93261	No	92	9	21	High-quality	High-quality	100	HMM-based (lower-bound)	1
RGVC1505	2022NBT-25267	93258	No	91	6	1	High-quality	High-quality	100	AAI-based (high-confidence)	1
RGVC1506	2022NBT-25276	93205	No	91	5	10	High-quality	High-quality	100	AAI-based (high-confidence)	1
RGVC1507	2022NBT-253	900002	No	856	11	486	High-quality	High-quality	100	HMM-based (lower-bound)	1
RGVC1508	2022NBT-2531	491496	No	367	4	201	High-quality	High-quality	100	HMM-based (lower-bound)	1
RGVC1509	2022NBT-25336_1	78512	Yes	116	7	7	High-quality	High-quality	100	AAI-based (medium-confidence)	1
RGVC1510	2022NBT-2535	491117	No	490	13	311	High-quality	High-quality	100	HMM-based (lower-bound)	1
RGVC1511	2022NBT-25352_1	29488	Yes	99	6	38	Medium-quality	Genome-fragment	69.56	AAI-based (medium-confidence)	1
RGVC1512	2022NBT-25367	92895	No	108	14	1	Medium-quality	Genome-fragment	88.06	AAI-based (medium-confidence)	1
RGVC1513	2022NBT-2537	490677	No	530	2	340	High-quality	High-quality	100	HMM-based (lower-bound)	1
RGVC1514	2022NBT-25383	92846	No	112	22	11	Medium-quality	Genome-fragment	73.49	AAI-based (medium-confidence)	1
RGVC1515	2022NBT-25384_2	41752	Yes	58	17	1	High-quality	High-quality	90.71	AAI-based (high-confidence)	1
RGVC1516	2022NBT-2539	490537	No	390	1	269	High-quality	High-quality	100	HMM-based (lower-bound)	1
RGVC1517	2022NBT-254	899500	No	830	4	471	High-quality	High-quality	100	HMM-based (lower-bound)	1
RGVC1518	2022NBT-2540	490327	No	506	3	382	High-quality	High-quality	100	HMM-based (lower-bound)	1
RGVC1519	2022NBT-25414	92742	No	113	2	22	Medium-quality	Genome-fragment	65.06	HMM-based (lower-bound)	1
RGVC1520	2022NBT-25466	92582	No	111	2	15	Medium-quality	Genome-fragment	81.96	HMM-based (lower-bound)	1
RGVC1521	2022NBT-2547_1	40909	Yes	575	30	346	Medium-quality	Genome-fragment	54.27	HMM-based (lower-bound)	1
RGVC1522	2022NBT-2548	489554	No	549	9	271	High-quality	High-quality	98.18	HMM-based (lower-bound)	1
RGVC1523	2022NBT-255	899461	No	860	3	582	High-quality	High-quality	100	HMM-based (lower-bound)	1
RGVC1524	2022NBT-25502	92469	No	121	18	0	High-quality	High-quality	100	AAI-based (medium-confidence)	1.59
RGVC1525	2022NBT-25525_1	44950	Yes	116	22	44	High-quality	High-quality	100	AAI-based (high-confidence)	1
RGVC1526	2022NBT-25530	92349	No	140	14	5	High-quality	High-quality	100	AAI-based (medium-confidence)	1
RGVC1527	2022NBT-25558	92279	No	113	1	29	High-quality	High-quality	100	HMM-based (lower-bound)	1
RGVC1528	2022NBT-25568	92262	No	111	28	0	Medium-quality	Genome-fragment	75.5	AAI-based (medium-confidence)	1
RGVC1529	2022NBT-2559	488654	No	453	2	257	High-quality	High-quality	100	HMM-based (lower-bound)	1
RGVC1530	2022NBT-256	899404	No	684	5	413	High-quality	High-quality	100	HMM-based (lower-bound)	1
RGVC1531	2022NBT-25608	92148	No	95	1	25	High-quality	High-quality	100	HMM-based (lower-bound)	1
RGVC1532	2022NBT-25634	92065	No	100	1	39	High-quality	High-quality	100	HMM-based (lower-bound)	1
RGVC1533	2022NBT-2566	488161	No	557	1	247	High-quality	High-quality	100	HMM-based (lower-bound)	1
RGVC1534	2022NBT-25669_1	43472	Yes	128	30	38	Complete	High-quality	100	Provirus (high-confidence)	1
RGVC1535	2022NBT-2567	488154	No	408	6	293	High-quality	High-quality	100	HMM-based (lower-bound)	1
RGVC1536	2022NBT-25682	91920	No	122	1	38	Medium-quality	Genome-fragment	51.99	HMM-based (lower-bound)	1
RGVC1537	2022NBT-257	899325	No	1150	6	587	High-quality	High-quality	100	HMM-based (lower-bound)	1
RGVC1538	2022NBT-2572	487829	No	454	3	284	High-quality	High-quality	100	HMM-based (lower-bound)	1
RGVC1539	2022NBT-25735	91730	No	177	24	27	High-quality	High-quality	100	AAI-based (medium-confidence)	1
RGVC1540	2022NBT-25775	91556	No	103	2	40	High-quality	High-quality	100	HMM-based (lower-bound)	1
RGVC1541	2022NBT-25819	91402	No	153	14	1	Medium-quality	Genome-fragment	70.93	HMM-based (lower-bound)	1
RGVC1542	2022NBT-2582	486724	No	612	1	346	High-quality	High-quality	100	HMM-based (lower-bound)	1
RGVC1543	2022NBT-25820	91401	No	102	8	0	High-quality	High-quality	98.5	AAI-based (high-confidence)	1
RGVC1544	2022NBT-25831	91355	No	116	10	48	High-quality	High-quality	97.8	HMM-based (lower-bound)	1
RGVC1545	2022NBT-25883_1	60810	Yes	124	18	20	Medium-quality	Genome-fragment	87.71	HMM-based (lower-bound)	1
RGVC1546	2022NBT-25885	91166	No	134	3	17	Medium-quality	Genome-fragment	83.7	HMM-based (lower-bound)	1
RGVC1547	2022NBT-25901	91130	No	191	7	35	Medium-quality	Genome-fragment	69.39	HMM-based (lower-bound)	1
RGVC1548	2022NBT-25915	91093	No	102	3	30	Medium-quality	Genome-fragment	83.4	HMM-based (lower-bound)	1
RGVC1549	2022NBT-25917	91087	No	161	38	1	High-quality	High-quality	100	AAI-based (high-confidence)	1
RGVC1550	2022NBT-25951	90957	No	143	2	15	Medium-quality	Genome-fragment	84.55	HMM-based (lower-bound)	1
RGVC1551	2022NBT-25966_1	63438	Yes	99	15	17	High-quality	High-quality	100	AAI-based (high-confidence)	1
RGVC1552	2022NBT-25968	90873	No	100	3	48	High-quality	High-quality	94.5	HMM-based (lower-bound)	1
RGVC1553	2022NBT-25976	90857	No	81	1	44	High-quality	High-quality	100	HMM-based (lower-bound)	1
RGVC1554	2022NBT-26	985888	No	835	6	512	High-quality	High-quality	100	HMM-based (lower-bound)	1
RGVC1555	2022NBT-260	898208	No	788	4	461	High-quality	High-quality	100	HMM-based (lower-bound)	1
RGVC1556	2022NBT-2600_1	37917	Yes	440	29	228	Medium-quality	Genome-fragment	63.44	HMM-based (lower-bound)	1
RGVC1557	2022NBT-2604	484063	No	425	6	254	High-quality	High-quality	100	HMM-based (lower-bound)	1.01
RGVC1558	2022NBT-26046	90630	No	145	27	2	Medium-quality	Genome-fragment	74.95	AAI-based (high-confidence)	1
RGVC1559	2022NBT-2606	484019	No	670	1	305	High-quality	High-quality	100	HMM-based (lower-bound)	1
RGVC1560	2022NBT-2608	483862	No	418	12	221	High-quality	High-quality	100	HMM-based (lower-bound)	1
RGVC1561	2022NBT-26083_1	74229	Yes	140	5	9	Medium-quality	Genome-fragment	72.93	HMM-based (lower-bound)	1
RGVC1562	2022NBT-26097_1	49697	Yes	54	3	11	Medium-quality	Genome-fragment	52.64	HMM-based (lower-bound)	1
RGVC1563	2022NBT-26099	90456	No	126	27	1	High-quality	High-quality	98.64	AAI-based (high-confidence)	1
RGVC1564	2022NBT-261	898204	No	744	5	518	High-quality	High-quality	99.3	HMM-based (lower-bound)	1
RGVC1565	2022NBT-2610	483764	No	433	3	290	High-quality	High-quality	100	HMM-based (lower-bound)	1
RGVC1566	2022NBT-2611	483760	No	503	4	261	High-quality	High-quality	100	HMM-based (lower-bound)	1
RGVC1567	2022NBT-26121_1	72070	Yes	150	12	32	Complete	High-quality	100	Provirus (medium-confidence)	1
RGVC1568	2022NBT-26123	90383	No	121	4	1	Medium-quality	Genome-fragment	75.07	HMM-based (lower-bound)	1
RGVC1569	2022NBT-2614_1	123107	Yes	452	32	232	High-quality	High-quality	99.38	HMM-based (lower-bound)	1
RGVC1570	2022NBT-26146	90345	No	145	75	0	High-quality	High-quality	100	AAI-based (medium-confidence)	1.2
RGVC1571	2022NBT-262_1	45216	Yes	885	18	515	Medium-quality	Genome-fragment	79.13	HMM-based (lower-bound)	1
RGVC1572	2022NBT-2624	482217	No	511	9	305	High-quality	High-quality	100	HMM-based (lower-bound)	1
RGVC1573	2022NBT-26242	90055	No	99	11	3	High-quality	High-quality	91.52	AAI-based (high-confidence)	1
RGVC1574	2022NBT-2627_1	45937	Yes	476	6	299	Complete	High-quality	100	Provirus (medium-confidence)	1
RGVC1575	2022NBT-2629	482023	No	428	2	326	Medium-quality	Genome-fragment	88.94	HMM-based (lower-bound)	1
RGVC1576	2022NBT-263	897725	No	756	8	401	High-quality	High-quality	100	HMM-based (lower-bound)	1
RGVC1577	2022NBT-26301	89915	No	84	5	51	Medium-quality	Genome-fragment	62.16	HMM-based (lower-bound)	1
RGVC1578	2022NBT-2632	481610	No	483	8	247	High-quality	High-quality	98.88	HMM-based (lower-bound)	1
RGVC1579	2022NBT-26327	89841	No	127	3	34	High-quality	High-quality	95.91	HMM-based (lower-bound)	1
RGVC1580	2022NBT-2633	481584	No	475	7	290	High-quality	High-quality	100	HMM-based (lower-bound)	1
RGVC1581	2022NBT-26343	89781	No	82	25	8	High-quality	High-quality	100	AAI-based (high-confidence)	1
RGVC1582	2022NBT-26346	89778	No	173	4	55	Medium-quality	Genome-fragment	82.44	HMM-based (lower-bound)	1
RGVC1583	2022NBT-26384	89671	No	119	9	7	Medium-quality	Genome-fragment	83.86	HMM-based (lower-bound)	1
RGVC1584	2022NBT-26397	89627	No	100	1	39	Medium-quality	Genome-fragment	56.78	HMM-based (lower-bound)	1
RGVC1585	2022NBT-264_1	33526	Yes	1021	17	578	Medium-quality	Genome-fragment	52.37	HMM-based (lower-bound)	1
RGVC1586	2022NBT-26402	89615	No	116	3	66	Medium-quality	Genome-fragment	84.68	HMM-based (lower-bound)	1
RGVC1587	2022NBT-26414	89565	No	135	14	2	Medium-quality	Genome-fragment	66.98	HMM-based (lower-bound)	1
RGVC1588	2022NBT-26423	89544	No	161	2	35	Medium-quality	Genome-fragment	86.33	HMM-based (lower-bound)	1
RGVC1589	2022NBT-2646	480234	No	424	4	267	High-quality	High-quality	100	HMM-based (lower-bound)	1
RGVC1590	2022NBT-26472	89391	No	148	2	42	Medium-quality	Genome-fragment	60.25	HMM-based (lower-bound)	1
RGVC1591	2022NBT-26482_1	80871	Yes	133	25	17	High-quality	High-quality	100	AAI-based (high-confidence)	1
RGVC1592	2022NBT-265	896863	No	802	4	603	High-quality	High-quality	100	HMM-based (lower-bound)	1
RGVC1593	2022NBT-26509	89278	No	152	7	23	High-quality	High-quality	100	AAI-based (medium-confidence)	1
RGVC1594	2022NBT-26511	89274	No	140	2	50	High-quality	High-quality	100	HMM-based (lower-bound)	1
RGVC1595	2022NBT-26519	89252	No	134	5	48	Medium-quality	Genome-fragment	69.12	HMM-based (lower-bound)	1
RGVC1596	2022NBT-2652	479816	No	419	4	241	High-quality	High-quality	100	HMM-based (lower-bound)	1
RGVC1597	2022NBT-2653	479763	No	463	13	289	High-quality	High-quality	100	HMM-based (lower-bound)	1
RGVC1598	2022NBT-2655_1	36936	Yes	428	15	242	Medium-quality	Genome-fragment	60.22	HMM-based (lower-bound)	1
RGVC1599	2022NBT-2658	478630	No	442	3	302	High-quality	High-quality	100	HMM-based (lower-bound)	1.01
RGVC1600	2022NBT-2660	478443	No	538	6	273	High-quality	High-quality	100	HMM-based (lower-bound)	1
RGVC1601	2022NBT-26607	88933	No	83	3	37	Medium-quality	Genome-fragment	67.15	HMM-based (lower-bound)	1
RGVC1602	2022NBT-26613	88911	No	177	6	18	High-quality	High-quality	96.58	HMM-based (lower-bound)	1
RGVC1603	2022NBT-2663_1	35351	Yes	559	18	238	Medium-quality	Genome-fragment	55.99	HMM-based (lower-bound)	1
RGVC1604	2022NBT-2664	478195	No	426	1	276	High-quality	High-quality	100	HMM-based (lower-bound)	1
RGVC1605	2022NBT-26660	88726	No	160	1	67	Medium-quality	Genome-fragment	50.19	HMM-based (lower-bound)	1
RGVC1606	2022NBT-2676	477313	No	513	1	352	High-quality	High-quality	100	HMM-based (lower-bound)	1
RGVC1607	2022NBT-26775	88395	No	110	9	38	High-quality	High-quality	97.61	HMM-based (lower-bound)	1
RGVC1608	2022NBT-26778	88389	No	124	1	25	High-quality	High-quality	100	HMM-based (lower-bound)	1
RGVC1609	2022NBT-26782	88377	No	88	2	55	High-quality	High-quality	99.21	HMM-based (lower-bound)	1
RGVC1610	2022NBT-26786	88367	No	88	2	19	Medium-quality	Genome-fragment	89.03	HMM-based (lower-bound)	1
RGVC1611	2022NBT-2680	476694	No	535	5	338	High-quality	High-quality	100	HMM-based (lower-bound)	1
RGVC1612	2022NBT-26807	88333	No	91	1	40	High-quality	High-quality	100	HMM-based (lower-bound)	1
RGVC1613	2022NBT-26846	88201	No	55	1	33	Medium-quality	Genome-fragment	79.26	HMM-based (lower-bound)	1
RGVC1614	2022NBT-26866	88147	No	115	26	3	Medium-quality	Genome-fragment	66.24	AAI-based (high-confidence)	1
RGVC1615	2022NBT-26867_1	59887	Yes	118	24	15	High-quality	High-quality	100	AAI-based (medium-confidence)	1
RGVC1616	2022NBT-26869_1	49915	Yes	132	17	21	Medium-quality	Genome-fragment	70.33	HMM-based (lower-bound)	1
RGVC1617	2022NBT-26898	88038	No	109	2	62	Medium-quality	Genome-fragment	51.46	HMM-based (lower-bound)	1
RGVC1618	2022NBT-269	896245	No	1057	5	460	High-quality	High-quality	100	HMM-based (lower-bound)	1
RGVC1619	2022NBT-26919	87980	No	73	1	23	High-quality	High-quality	100	HMM-based (lower-bound)	1
RGVC1620	2022NBT-2694	475681	No	489	18	302	High-quality	High-quality	100	HMM-based (lower-bound)	1
RGVC1621	2022NBT-2695	475650	No	449	6	279	High-quality	High-quality	100	HMM-based (lower-bound)	1
RGVC1622	2022NBT-26958	87877	No	95	4	43	High-quality	High-quality	95.21	HMM-based (lower-bound)	1
RGVC1623	2022NBT-26995	87780	No	103	20	3	Medium-quality	Genome-fragment	65.39	AAI-based (high-confidence)	1.02
RGVC1624	2022NBT-27	985415	No	808	4	508	High-quality	High-quality	100	HMM-based (lower-bound)	1
RGVC1625	2022NBT-27008	87729	No	85	9	0	Complete	High-quality	100	DTR (high-confidence)	1
RGVC1626	2022NBT-27023	87674	No	121	9	12	High-quality	High-quality	90.15	HMM-based (lower-bound)	1
RGVC1627	2022NBT-27029	87656	No	93	1	40	Medium-quality	Genome-fragment	56.73	HMM-based (lower-bound)	1
RGVC1628	2022NBT-27043_1	58218	Yes	145	10	16	High-quality	High-quality	98.97	AAI-based (high-confidence)	1
RGVC1629	2022NBT-27055	87572	No	122	1	40	High-quality	High-quality	100	HMM-based (lower-bound)	1
RGVC1630	2022NBT-27060	87550	No	145	3	29	High-quality	High-quality	96.74	HMM-based (lower-bound)	1
RGVC1631	2022NBT-27068_1	63702	Yes	106	10	9	Medium-quality	Genome-fragment	83.14	HMM-based (lower-bound)	1
RGVC1632	2022NBT-2708	474358	No	446	6	288	High-quality	High-quality	98.07	HMM-based (lower-bound)	1
RGVC1633	2022NBT-271	895063	No	793	6	553	High-quality	High-quality	100	HMM-based (lower-bound)	1
RGVC1634	2022NBT-2710	474256	No	515	6	360	High-quality	High-quality	100	HMM-based (lower-bound)	1
RGVC1635	2022NBT-27104	87452	No	126	23	1	High-quality	High-quality	95.23	AAI-based (high-confidence)	1
RGVC1636	2022NBT-272	894913	No	873	2	542	High-quality	High-quality	100	HMM-based (lower-bound)	1
RGVC1637	2022NBT-27211	87144	No	112	7	0	High-quality	High-quality	100	AAI-based (medium-confidence)	1
RGVC1638	2022NBT-27218	87122	No	114	1	24	High-quality	High-quality	100	HMM-based (lower-bound)	1
RGVC1639	2022NBT-27226	87097	No	65	1	37	High-quality	High-quality	100	HMM-based (lower-bound)	1
RGVC1640	2022NBT-27259_1	71176	Yes	115	7	8	Medium-quality	Genome-fragment	81.81	HMM-based (lower-bound)	1
RGVC1641	2022NBT-27276	86923	No	84	1	43	Medium-quality	Genome-fragment	55.07	HMM-based (lower-bound)	1
RGVC1642	2022NBT-2728	472468	No	415	3	303	High-quality	High-quality	100	HMM-based (lower-bound)	1
RGVC1643	2022NBT-27291	86874	No	89	3	9	Medium-quality	Genome-fragment	89.36	HMM-based (lower-bound)	1
RGVC1644	2022NBT-2733	472038	No	415	3	272	High-quality	High-quality	100	HMM-based (lower-bound)	1
RGVC1645	2022NBT-27341	86707	No	118	40	3	High-quality	High-quality	100	AAI-based (high-confidence)	1
RGVC1646	2022NBT-27434_1	36019	Yes	138	12	33	Complete	High-quality	100	Provirus (high-confidence)	1
RGVC1647	2022NBT-27435	86445	No	91	2	34	Medium-quality	Genome-fragment	68.14	HMM-based (lower-bound)	1
RGVC1648	2022NBT-2744	471289	No	412	5	268	High-quality	High-quality	100	HMM-based (lower-bound)	1
RGVC1649	2022NBT-27445	86420	No	151	23	2	High-quality	High-quality	98.38	AAI-based (high-confidence)	1
RGVC1650	2022NBT-27485_1	72759	Yes	127	7	11	Medium-quality	Genome-fragment	60.51	HMM-based (lower-bound)	1
RGVC1651	2022NBT-2749	471109	No	477	3	278	High-quality	High-quality	100	HMM-based (lower-bound)	1
RGVC1652	2022NBT-27508_1	39064	Yes	102	10	27	Complete	High-quality	100	Provirus (high-confidence)	1
RGVC1653	2022NBT-27510	86279	No	117	2	19	High-quality	High-quality	98.94	HMM-based (lower-bound)	1
RGVC1654	2022NBT-27539	86196	No	71	1	33	Medium-quality	Genome-fragment	80.82	HMM-based (lower-bound)	1
RGVC1655	2022NBT-27550	86158	No	110	11	4	High-quality	High-quality	92.55	HMM-based (lower-bound)	1
RGVC1656	2022NBT-2756	470800	No	401	3	283	High-quality	High-quality	100	HMM-based (lower-bound)	1.01
RGVC1657	2022NBT-276	894323	No	1168	3	779	High-quality	High-quality	99.99	HMM-based (lower-bound)	1
RGVC1658	2022NBT-2760	470397	No	352	1	237	High-quality	High-quality	100	HMM-based (lower-bound)	1
RGVC1659	2022NBT-27615	85991	No	94	1	56	High-quality	High-quality	100	HMM-based (lower-bound)	1
RGVC1660	2022NBT-2762	470043	No	417	6	213	High-quality	High-quality	100	HMM-based (lower-bound)	1
RGVC1661	2022NBT-2763	469785	No	453	5	215	High-quality	High-quality	100	HMM-based (lower-bound)	1
RGVC1662	2022NBT-2764	469750	No	619	2	335	High-quality	High-quality	100	HMM-based (lower-bound)	1
RGVC1663	2022NBT-27648	85916	No	80	2	40	High-quality	High-quality	100	HMM-based (lower-bound)	1
RGVC1664	2022NBT-27656	85900	No	75	2	24	High-quality	High-quality	100	HMM-based (lower-bound)	1
RGVC1665	2022NBT-27677	85846	No	137	31	1	High-quality	High-quality	100	AAI-based (high-confidence)	1.21
RGVC1666	2022NBT-2768_1	103270	Yes	448	42	219	Complete	High-quality	100	Provirus (high-confidence)	1
RGVC1667	2022NBT-27734	85653	No	89	1	48	High-quality	High-quality	100	HMM-based (lower-bound)	1
RGVC1668	2022NBT-27736_1	39469	Yes	100	21	23	High-quality	High-quality	92.44	AAI-based (medium-confidence)	1.02
RGVC1669	2022NBT-27738_1	74679	Yes	100	24	11	High-quality	High-quality	100	AAI-based (high-confidence)	1
RGVC1670	2022NBT-27741	85633	No	199	16	0	High-quality	High-quality	100	AAI-based (medium-confidence)	1
RGVC1671	2022NBT-27748_1	26037	Yes	120	18	45	Medium-quality	Genome-fragment	56.94	AAI-based (high-confidence)	1
RGVC1672	2022NBT-27803	85441	No	78	1	35	High-quality	High-quality	100	HMM-based (lower-bound)	1
RGVC1673	2022NBT-2783	467477	No	436	2	253	High-quality	High-quality	100	HMM-based (lower-bound)	1
RGVC1674	2022NBT-27838	85347	No	128	2	38	High-quality	High-quality	100	HMM-based (lower-bound)	1
RGVC1675	2022NBT-2788	467142	No	465	5	267	High-quality	High-quality	100	HMM-based (lower-bound)	1
RGVC1676	2022NBT-279	893449	No	844	6	526	High-quality	High-quality	100	HMM-based (lower-bound)	1
RGVC1677	2022NBT-2792_1	44207	Yes	480	26	295	Medium-quality	Genome-fragment	66.12	HMM-based (lower-bound)	1
RGVC1678	2022NBT-27926	85095	No	77	2	49	Medium-quality	Genome-fragment	52.21	HMM-based (lower-bound)	1.05
RGVC1679	2022NBT-27930	85085	No	140	25	2	High-quality	High-quality	90.26	HMM-based (lower-bound)	1
RGVC1680	2022NBT-27932	85083	No	90	3	25	Medium-quality	Genome-fragment	67.64	HMM-based (lower-bound)	1
RGVC1681	2022NBT-27964	85007	No	122	1	89	Medium-quality	Genome-fragment	55.01	HMM-based (lower-bound)	1
RGVC1682	2022NBT-27982_1	78613	Yes	112	28	7	High-quality	High-quality	100	AAI-based (high-confidence)	1
RGVC1683	2022NBT-27992	84917	No	130	14	1	High-quality	High-quality	100	AAI-based (medium-confidence)	1
RGVC1684	2022NBT-28_1	40628	Yes	1010	55	575	Medium-quality	Genome-fragment	54	HMM-based (lower-bound)	1
RGVC1685	2022NBT-280	892963	No	741	7	455	High-quality	High-quality	100	HMM-based (lower-bound)	1
RGVC1686	2022NBT-28002	84894	No	139	13	5	High-quality	High-quality	98.96	AAI-based (medium-confidence)	1
RGVC1687	2022NBT-28006	84893	No	119	2	30	Medium-quality	Genome-fragment	87.03	HMM-based (lower-bound)	1
RGVC1688	2022NBT-28029	84841	No	83	1	59	High-quality	High-quality	100	HMM-based (lower-bound)	1
RGVC1689	2022NBT-2803	465703	No	537	1	308	High-quality	High-quality	100	HMM-based (lower-bound)	1
RGVC1690	2022NBT-2809	465254	No	381	1	221	High-quality	High-quality	100	HMM-based (lower-bound)	1
RGVC1691	2022NBT-28091	84653	No	78	3	44	High-quality	High-quality	93.72	HMM-based (lower-bound)	1
RGVC1692	2022NBT-281	892854	No	778	6	509	High-quality	High-quality	94.06	HMM-based (lower-bound)	1
RGVC1693	2022NBT-28100_1	70569	Yes	93	36	8	High-quality	High-quality	100	AAI-based (high-confidence)	1
RGVC1694	2022NBT-2813_1	41346	Yes	519	7	237	Medium-quality	Genome-fragment	64.27	HMM-based (lower-bound)	1
RGVC1695	2022NBT-2815	464608	No	423	7	286	High-quality	High-quality	100	HMM-based (lower-bound)	1
RGVC1696	2022NBT-28154	84463	No	91	2	53	High-quality	High-quality	91.69	HMM-based (lower-bound)	1
RGVC1697	2022NBT-28160	84434	No	121	4	21	High-quality	High-quality	100	HMM-based (lower-bound)	1
RGVC1698	2022NBT-28165	84414	No	104	8	1	Medium-quality	Genome-fragment	82.55	HMM-based (lower-bound)	1.74
RGVC1699	2022NBT-28207	84320	No	111	4	8	Medium-quality	Genome-fragment	89.92	HMM-based (lower-bound)	1
RGVC1700	2022NBT-28219	84289	No	117	1	28	High-quality	High-quality	100	HMM-based (lower-bound)	1
RGVC1701	2022NBT-28228_2	29124	Yes	30	10	0	Medium-quality	Genome-fragment	69.84	AAI-based (medium-confidence)	1
RGVC1702	2022NBT-28272	84133	No	72	4	5	Medium-quality	Genome-fragment	81.54	HMM-based (lower-bound)	1
RGVC1703	2022NBT-28274	84126	No	111	1	19	Medium-quality	Genome-fragment	56.59	HMM-based (lower-bound)	1
RGVC1704	2022NBT-2829	463446	No	459	4	244	High-quality	High-quality	100	HMM-based (lower-bound)	1
RGVC1705	2022NBT-28293	84077	No	138	2	61	High-quality	High-quality	100	HMM-based (lower-bound)	1
RGVC1706	2022NBT-283	892414	No	885	6	542	High-quality	High-quality	100	HMM-based (lower-bound)	1
RGVC1707	2022NBT-28325_1	65065	Yes	119	17	12	High-quality	High-quality	100	AAI-based (high-confidence)	1
RGVC1708	2022NBT-28327	83978	No	64	1	34	High-quality	High-quality	100	HMM-based (lower-bound)	1
RGVC1709	2022NBT-28374_1	43333	Yes	127	19	20	Medium-quality	Genome-fragment	89.19	HMM-based (lower-bound)	1
RGVC1710	2022NBT-2841	462463	No	568	4	302	High-quality	High-quality	100	HMM-based (lower-bound)	1
RGVC1711	2022NBT-28415	83741	No	106	1	36	High-quality	High-quality	100	HMM-based (lower-bound)	1
RGVC1712	2022NBT-28493_1	46817	Yes	88	30	18	Complete	High-quality	100	Provirus (high-confidence)	1
RGVC1713	2022NBT-28505	83517	No	122	5	4	Medium-quality	Genome-fragment	69.96	HMM-based (lower-bound)	1
RGVC1714	2022NBT-28506	83514	No	76	1	40	High-quality	High-quality	96.07	HMM-based (lower-bound)	1
RGVC1715	2022NBT-2851	461929	No	378	9	202	High-quality	High-quality	100	HMM-based (lower-bound)	1
RGVC1716	2022NBT-2853	461689	No	455	1	282	High-quality	High-quality	100	HMM-based (lower-bound)	1
RGVC1717	2022NBT-28537	83437	No	96	8	30	Medium-quality	Genome-fragment	81.91	HMM-based (lower-bound)	1
RGVC1718	2022NBT-28540	83434	No	139	14	1	High-quality	High-quality	100	AAI-based (medium-confidence)	1
RGVC1719	2022NBT-28546	83420	No	118	12	8	Complete	High-quality	100	ITR (high-confidence)	1
RGVC1720	2022NBT-2855_1	38064	Yes	613	7	335	Medium-quality	Genome-fragment	51.81	HMM-based (lower-bound)	1
RGVC1721	2022NBT-28564	83353	No	111	18	1	High-quality	High-quality	100	AAI-based (medium-confidence)	1
RGVC1722	2022NBT-2858_1	64597	Yes	427	32	212	Complete	High-quality	100	Provirus (high-confidence)	1
RGVC1723	2022NBT-286	891603	No	738	5	472	High-quality	High-quality	100	HMM-based (lower-bound)	1
RGVC1724	2022NBT-2862_1	36456	Yes	403	13	204	Medium-quality	Genome-fragment	53.15	HMM-based (lower-bound)	1
RGVC1725	2022NBT-28621_1	55054	Yes	120	9	15	High-quality	High-quality	100	AAI-based (high-confidence)	1
RGVC1726	2022NBT-28623	83212	No	149	30	1	High-quality	High-quality	100	AAI-based (high-confidence)	1
RGVC1727	2022NBT-28659	83134	No	137	19	20	High-quality	High-quality	99.06	HMM-based (lower-bound)	1
RGVC1728	2022NBT-28667	83110	No	117	2	18	Medium-quality	Genome-fragment	72.03	HMM-based (lower-bound)	1
RGVC1729	2022NBT-28678	83092	No	150	13	6	High-quality	High-quality	100	AAI-based (medium-confidence)	1
RGVC1730	2022NBT-2868	460551	No	491	2	304	High-quality	High-quality	100	HMM-based (lower-bound)	1
RGVC1731	2022NBT-28682	83077	No	131	36	1	High-quality	High-quality	100	AAI-based (medium-confidence)	1
RGVC1732	2022NBT-28694	83051	No	119	36	0	High-quality	High-quality	100	AAI-based (medium-confidence)	1
RGVC1733	2022NBT-2873	459797	No	680	3	247	High-quality	High-quality	100	HMM-based (lower-bound)	1
RGVC1734	2022NBT-28732	82947	No	131	6	21	High-quality	High-quality	93.51	HMM-based (lower-bound)	1
RGVC1735	2022NBT-28738	82935	No	98	2	12	Medium-quality	Genome-fragment	54.76	HMM-based (lower-bound)	1
RGVC1736	2022NBT-2878_1	44976	Yes	50	8	3	High-quality	High-quality	94.3	AAI-based (medium-confidence)	1
RGVC1737	2022NBT-28787	82805	No	127	5	11	High-quality	High-quality	100	AAI-based (high-confidence)	1
RGVC1738	2022NBT-288	891143	No	839	19	526	High-quality	High-quality	100	HMM-based (lower-bound)	1
RGVC1739	2022NBT-28813	82727	No	88	1	44	Medium-quality	Genome-fragment	51.53	HMM-based (lower-bound)	1
RGVC1740	2022NBT-28815	82725	No	135	10	6	High-quality	High-quality	100	AAI-based (medium-confidence)	1
RGVC1741	2022NBT-2883	459046	No	414	1	296	Medium-quality	Genome-fragment	83.84	HMM-based (lower-bound)	1
RGVC1742	2022NBT-2886_1	44069	Yes	462	17	287	Medium-quality	Genome-fragment	62.59	HMM-based (lower-bound)	1
RGVC1743	2022NBT-28868_1	25321	Yes	101	7	22	Medium-quality	Genome-fragment	56.08	AAI-based (high-confidence)	1
RGVC1744	2022NBT-28872	82591	No	76	3	38	Medium-quality	Genome-fragment	79.9	HMM-based (lower-bound)	1
RGVC1745	2022NBT-28873	82588	No	102	1	19	High-quality	High-quality	97.93	HMM-based (lower-bound)	1
RGVC1746	2022NBT-2889	457938	No	441	1	258	High-quality	High-quality	100	HMM-based (lower-bound)	1
RGVC1747	2022NBT-289	890800	No	839	4	622	High-quality	High-quality	100	HMM-based (lower-bound)	1
RGVC1748	2022NBT-2893	457613	No	462	8	187	High-quality	High-quality	100	HMM-based (lower-bound)	1
RGVC1749	2022NBT-2896	457284	No	453	4	288	High-quality	High-quality	100	HMM-based (lower-bound)	1
RGVC1750	2022NBT-2897	457191	No	426	3	283	High-quality	High-quality	100	HMM-based (lower-bound)	1
RGVC1751	2022NBT-29_1	69354	Yes	907	14	538	Medium-quality	Genome-fragment	50.44	HMM-based (lower-bound)	1
RGVC1752	2022NBT-29013	82204	No	83	3	14	Medium-quality	Genome-fragment	50.48	HMM-based (lower-bound)	1
RGVC1753	2022NBT-29085	82029	No	114	1	77	High-quality	High-quality	90.44	HMM-based (lower-bound)	1
RGVC1754	2022NBT-2910_1	33818	Yes	61	20	0	High-quality	High-quality	90.62	AAI-based (high-confidence)	1
RGVC1755	2022NBT-29106	81983	No	97	3	35	High-quality	High-quality	94.48	HMM-based (lower-bound)	1
RGVC1756	2022NBT-2912	455861	No	444	1	205	High-quality	High-quality	100	HMM-based (lower-bound)	1.01
RGVC1757	2022NBT-29176	81822	No	125	1	16	High-quality	High-quality	100	HMM-based (lower-bound)	1
RGVC1758	2022NBT-2918_1	41586	Yes	450	14	278	Complete	High-quality	100	Provirus (medium-confidence)	1
RGVC1759	2022NBT-29180	81820	No	122	18	0	Medium-quality	Genome-fragment	51.49	HMM-based (lower-bound)	1
RGVC1760	2022NBT-29188_1	18072	Yes	93	2	39	Complete	High-quality	100	Provirus (high-confidence)	1.02
RGVC1761	2022NBT-29196	81790	No	149	19	4	Medium-quality	Genome-fragment	89.25	HMM-based (lower-bound)	1
RGVC1762	2022NBT-29197	81790	No	100	25	1	Medium-quality	Genome-fragment	68.28	AAI-based (high-confidence)	1
RGVC1763	2022NBT-292	890531	No	861	7	519	High-quality	High-quality	100	HMM-based (lower-bound)	1
RGVC1764	2022NBT-29205	81753	No	141	11	10	High-quality	High-quality	100	AAI-based (high-confidence)	1
RGVC1765	2022NBT-29207	81751	No	69	1	40	Medium-quality	Genome-fragment	81.94	HMM-based (lower-bound)	1
RGVC1766	2022NBT-29217	81728	No	92	1	49	High-quality	High-quality	100	HMM-based (lower-bound)	1
RGVC1767	2022NBT-29220	81724	No	145	1	32	High-quality	High-quality	100	HMM-based (lower-bound)	1
RGVC1768	2022NBT-29261	81621	No	144	1	44	High-quality	High-quality	100	HMM-based (lower-bound)	1
RGVC1769	2022NBT-29269_1	34055	Yes	100	9	30	Medium-quality	Genome-fragment	58.5	HMM-based (lower-bound)	1
RGVC1770	2022NBT-29271_1	44431	Yes	103	19	26	High-quality	High-quality	100	AAI-based (high-confidence)	1
RGVC1771	2022NBT-2928_1	191916	Yes	416	83	102	Complete	High-quality	100	Provirus (high-confidence)	1.03
RGVC1772	2022NBT-29288_1	30329	Yes	86	14	28	Medium-quality	Genome-fragment	65.9	AAI-based (medium-confidence)	1
RGVC1773	2022NBT-293_1	51798	Yes	824	11	484	Medium-quality	Genome-fragment	79.19	HMM-based (lower-bound)	1
RGVC1774	2022NBT-2936	454699	No	426	3	229	High-quality	High-quality	100	HMM-based (lower-bound)	1
RGVC1775	2022NBT-294	889570	No	781	7	455	High-quality	High-quality	100	HMM-based (lower-bound)	1
RGVC1776	2022NBT-2941	454453	No	433	1	266	High-quality	High-quality	100	HMM-based (lower-bound)	1
RGVC1777	2022NBT-2942	454333	No	417	2	301	High-quality	High-quality	100	HMM-based (lower-bound)	1
RGVC1778	2022NBT-29428	81233	No	81	1	22	High-quality	High-quality	91.19	HMM-based (lower-bound)	1
RGVC1779	2022NBT-29467	81102	No	67	2	42	Medium-quality	Genome-fragment	64.38	HMM-based (lower-bound)	1
RGVC1780	2022NBT-295	889334	No	905	3	411	High-quality	High-quality	100	HMM-based (lower-bound)	1
RGVC1781	2022NBT-29528	80933	No	129	14	4	High-quality	High-quality	100	AAI-based (medium-confidence)	1
RGVC1782	2022NBT-29536	80917	No	80	3	40	High-quality	High-quality	100	HMM-based (lower-bound)	1
RGVC1783	2022NBT-29561	80841	No	116	10	0	Medium-quality	Genome-fragment	57.26	HMM-based (lower-bound)	1
RGVC1784	2022NBT-29566	80830	No	133	2	36	High-quality	High-quality	100	HMM-based (lower-bound)	1
RGVC1785	2022NBT-29568	80829	No	121	4	16	High-quality	High-quality	92.46	HMM-based (lower-bound)	1
RGVC1786	2022NBT-29588_1	33170	Yes	120	18	31	Medium-quality	Genome-fragment	59.01	HMM-based (lower-bound)	1
RGVC1787	2022NBT-296	889204	No	707	3	399	High-quality	High-quality	100	HMM-based (lower-bound)	1
RGVC1788	2022NBT-29610	80695	No	125	1	23	Medium-quality	Genome-fragment	64.58	HMM-based (lower-bound)	1
RGVC1789	2022NBT-29611	80693	No	104	4	16	Medium-quality	Genome-fragment	69.81	HMM-based (lower-bound)	1
RGVC1790	2022NBT-29613	80688	No	116	2	38	High-quality	High-quality	100	HMM-based (lower-bound)	1
RGVC1791	2022NBT-29614	80686	No	139	24	1	High-quality	High-quality	100	AAI-based (medium-confidence)	1
RGVC1792	2022NBT-2965_1	41776	Yes	437	20	193	Medium-quality	Genome-fragment	61.72	HMM-based (lower-bound)	1
RGVC1793	2022NBT-29659	80584	No	180	8	5	Medium-quality	Genome-fragment	58.6	HMM-based (lower-bound)	1
RGVC1794	2022NBT-2966_1	56706	Yes	443	23	256	Complete	High-quality	100	Provirus (medium-confidence)	1
RGVC1795	2022NBT-2968	451898	No	448	2	319	High-quality	High-quality	100	HMM-based (lower-bound)	1
RGVC1796	2022NBT-29683	80529	No	120	1	26	High-quality	High-quality	100	AAI-based (medium-confidence)	1
RGVC1797	2022NBT-29688	80521	No	88	1	41	High-quality	High-quality	90.39	HMM-based (lower-bound)	1
RGVC1798	2022NBT-29719	80442	No	94	10	24	High-quality	High-quality	100	AAI-based (high-confidence)	1
RGVC1799	2022NBT-2972	451564	No	571	2	271	High-quality	High-quality	100	HMM-based (lower-bound)	1
RGVC1800	2022NBT-2973_1	34946	Yes	51	10	0	High-quality	High-quality	100	AAI-based (high-confidence)	1
RGVC1801	2022NBT-2973_2	34708	Yes	55	13	1	Medium-quality	Genome-fragment	53	HMM-based (lower-bound)	1
RGVC1802	2022NBT-29760	80335	No	122	10	19	High-quality	High-quality	93.83	HMM-based (lower-bound)	1
RGVC1803	2022NBT-29774	80312	No	157	31	0	High-quality	High-quality	100	AAI-based (high-confidence)	1
RGVC1804	2022NBT-29784_1	45119	Yes	106	19	21	Complete	High-quality	100	Provirus (high-confidence)	1
RGVC1805	2022NBT-29797	80260	No	89	2	21	Medium-quality	Genome-fragment	87.64	HMM-based (lower-bound)	1
RGVC1806	2022NBT-29801	80253	No	92	2	25	Medium-quality	Genome-fragment	79.55	HMM-based (lower-bound)	1
RGVC1807	2022NBT-2984	450722	No	529	12	284	High-quality	High-quality	100	HMM-based (lower-bound)	1
RGVC1808	2022NBT-29852	80114	No	68	3	38	Medium-quality	Genome-fragment	89.29	HMM-based (lower-bound)	1
RGVC1809	2022NBT-29864_1	69035	Yes	94	25	9	High-quality	High-quality	100	AAI-based (high-confidence)	1
RGVC1810	2022NBT-2987	450261	No	405	2	262	High-quality	High-quality	100	HMM-based (lower-bound)	1
RGVC1811	2022NBT-29878	80054	No	93	8	0	Medium-quality	Genome-fragment	88.41	HMM-based (lower-bound)	1
RGVC1812	2022NBT-299	887382	No	915	1	588	High-quality	High-quality	100	HMM-based (lower-bound)	1
RGVC1813	2022NBT-2992	450070	No	406	2	261	High-quality	High-quality	100	HMM-based (lower-bound)	1
RGVC1814	2022NBT-29938	79897	No	120	2	19	Medium-quality	Genome-fragment	62.69	HMM-based (lower-bound)	1
RGVC1815	2022NBT-2994	449974	No	448	3	293	High-quality	High-quality	100	HMM-based (lower-bound)	1
RGVC1816	2022NBT-2995_1	114633	Yes	475	35	227	Complete	High-quality	100	Provirus (high-confidence)	1
RGVC1817	2022NBT-2998_1	37996	Yes	508	18	265	Medium-quality	Genome-fragment	63.94	HMM-based (lower-bound)	1
RGVC1818	2022NBT-30	984187	No	886	8	567	High-quality	High-quality	100	HMM-based (lower-bound)	1
RGVC1819	2022NBT-30019_1	74981	Yes	131	18	6	High-quality	High-quality	100	AAI-based (high-confidence)	1
RGVC1820	2022NBT-30048	79645	No	158	4	6	Medium-quality	Genome-fragment	53.65	HMM-based (lower-bound)	1
RGVC1821	2022NBT-3005	448734	No	439	5	288	High-quality	High-quality	100	HMM-based (lower-bound)	1
RGVC1822	2022NBT-3006	448732	No	453	3	300	High-quality	High-quality	100	HMM-based (lower-bound)	1
RGVC1823	2022NBT-30067	79597	No	92	1	47	High-quality	High-quality	100	HMM-based (lower-bound)	1
RGVC1824	2022NBT-30078_1	69360	Yes	117	23	5	High-quality	High-quality	100	AAI-based (high-confidence)	1
RGVC1825	2022NBT-30090	79531	No	151	50	1	High-quality	High-quality	100	AAI-based (high-confidence)	1.26
RGVC1826	2022NBT-30099	79515	No	99	23	5	High-quality	High-quality	100	AAI-based (high-confidence)	1
RGVC1827	2022NBT-3010	448131	No	400	11	269	High-quality	High-quality	100	HMM-based (lower-bound)	1
RGVC1828	2022NBT-30102	79510	No	114	7	2	Medium-quality	Genome-fragment	78.6	HMM-based (lower-bound)	1
RGVC1829	2022NBT-3013	447882	No	415	1	291	High-quality	High-quality	100	HMM-based (lower-bound)	1
RGVC1830	2022NBT-3014	447589	No	457	12	202	High-quality	High-quality	100	HMM-based (lower-bound)	1
RGVC1831	2022NBT-3015_1	34392	Yes	661	13	314	Medium-quality	Genome-fragment	70	HMM-based (lower-bound)	1
RGVC1832	2022NBT-30161	79387	No	163	27	2	High-quality	High-quality	100	AAI-based (high-confidence)	1.23
RGVC1833	2022NBT-3017	447388	No	446	6	251	High-quality	High-quality	100	HMM-based (lower-bound)	1
RGVC1834	2022NBT-302_1	37255	Yes	1198	27	649	Medium-quality	Genome-fragment	60.32	HMM-based (lower-bound)	1
RGVC1835	2022NBT-30208	79282	No	84	1	24	Medium-quality	Genome-fragment	72.2	HMM-based (lower-bound)	1
RGVC1836	2022NBT-30210_1	22896	Yes	143	12	29	Medium-quality	Genome-fragment	53.27	AAI-based (medium-confidence)	1
RGVC1837	2022NBT-30235	79219	No	118	1	27	Medium-quality	Genome-fragment	63.39	HMM-based (lower-bound)	1
RGVC1838	2022NBT-30236	79218	No	98	51	8	High-quality	High-quality	100	AAI-based (high-confidence)	1
RGVC1839	2022NBT-3024	446515	No	382	4	234	High-quality	High-quality	100	HMM-based (lower-bound)	1
RGVC1840	2022NBT-30295	79085	No	72	1	17	High-quality	High-quality	93.57	AAI-based (medium-confidence)	1
RGVC1841	2022NBT-30311	79045	No	126	1	30	High-quality	High-quality	100	HMM-based (lower-bound)	1
RGVC1842	2022NBT-30316	79038	No	71	2	23	Medium-quality	Genome-fragment	88.48	HMM-based (lower-bound)	1
RGVC1843	2022NBT-3033_1	36955	Yes	421	15	241	Medium-quality	Genome-fragment	71.64	HMM-based (lower-bound)	1
RGVC1844	2022NBT-30332	79007	No	125	2	32	Medium-quality	Genome-fragment	66.77	HMM-based (lower-bound)	1
RGVC1845	2022NBT-3042	444589	No	474	3	318	High-quality	High-quality	100	HMM-based (lower-bound)	1
RGVC1846	2022NBT-3043	444522	No	396	5	272	High-quality	High-quality	100	HMM-based (lower-bound)	1
RGVC1847	2022NBT-30443	78736	No	130	33	8	High-quality	High-quality	100	AAI-based (medium-confidence)	1
RGVC1848	2022NBT-30451	78721	No	111	7	7	High-quality	High-quality	96.96	HMM-based (lower-bound)	1
RGVC1849	2022NBT-30459_1	63834	Yes	95	27	11	High-quality	High-quality	100	AAI-based (high-confidence)	1
RGVC1850	2022NBT-3049	444331	No	390	2	293	High-quality	High-quality	100	HMM-based (lower-bound)	1
RGVC1851	2022NBT-30494_1	31295	Yes	98	2	39	Medium-quality	Genome-fragment	63.81	HMM-based (lower-bound)	1
RGVC1852	2022NBT-305	885349	No	1173	2	609	High-quality	High-quality	100	HMM-based (lower-bound)	1
RGVC1853	2022NBT-30518_1	61046	Yes	118	8	13	High-quality	High-quality	100	AAI-based (medium-confidence)	1
RGVC1854	2022NBT-3057	443699	No	437	8	272	High-quality	High-quality	100	HMM-based (lower-bound)	1
RGVC1855	2022NBT-306	885036	No	931	8	433	High-quality	High-quality	100	HMM-based (lower-bound)	1
RGVC1856	2022NBT-3060	443590	No	399	5	189	Medium-quality	Genome-fragment	68.2	HMM-based (lower-bound)	1
RGVC1857	2022NBT-30630	78306	No	133	1	3	Medium-quality	Genome-fragment	87.9	HMM-based (lower-bound)	1
RGVC1858	2022NBT-30658	78268	No	107	28	1	High-quality	High-quality	96.23	HMM-based (lower-bound)	1
RGVC1859	2022NBT-3066	443392	No	541	1	272	High-quality	High-quality	100	HMM-based (lower-bound)	1
RGVC1860	2022NBT-30664	78258	No	62	1	13	High-quality	High-quality	100	HMM-based (lower-bound)	1
RGVC1861	2022NBT-30667	78251	No	142	10	0	High-quality	High-quality	100	AAI-based (high-confidence)	1
RGVC1862	2022NBT-30670	78242	No	126	14	3	High-quality	High-quality	96.69	HMM-based (lower-bound)	1
RGVC1863	2022NBT-30676	78235	No	63	2	14	High-quality	High-quality	100	HMM-based (lower-bound)	1
RGVC1864	2022NBT-3071	442921	No	350	3	229	High-quality	High-quality	100	HMM-based (lower-bound)	1
RGVC1865	2022NBT-30795	77920	No	154	3	40	High-quality	High-quality	100	HMM-based (lower-bound)	1
RGVC1866	2022NBT-3081	442295	No	574	1	313	High-quality	High-quality	100	HMM-based (lower-bound)	1
RGVC1867	2022NBT-30833	77840	No	78	4	32	Medium-quality	Genome-fragment	82.02	HMM-based (lower-bound)	1
RGVC1868	2022NBT-30841	77831	No	124	5	36	Medium-quality	Genome-fragment	56.65	HMM-based (lower-bound)	1
RGVC1869	2022NBT-30874	77738	No	122	10	1	High-quality	High-quality	96.49	AAI-based (high-confidence)	1
RGVC1870	2022NBT-30890	77716	No	134	1	43	Medium-quality	Genome-fragment	87.24	HMM-based (lower-bound)	1
RGVC1871	2022NBT-30903	77673	No	95	3	38	Medium-quality	Genome-fragment	83.82	HMM-based (lower-bound)	1
RGVC1872	2022NBT-30910	77659	No	127	1	23	High-quality	High-quality	100	HMM-based (lower-bound)	1
RGVC1873	2022NBT-30913	77654	No	114	8	1	High-quality	High-quality	91.35	HMM-based (lower-bound)	1
RGVC1874	2022NBT-30917	77648	No	82	1	20	Medium-quality	Genome-fragment	87.16	HMM-based (lower-bound)	1
RGVC1875	2022NBT-30949	77563	No	123	16	9	High-quality	High-quality	90.62	HMM-based (lower-bound)	1
RGVC1876	2022NBT-30959	77539	No	133	0	45	High-quality	High-quality	100	AAI-based (high-confidence)	1
RGVC1877	2022NBT-30994	77473	No	100	2	41	High-quality	High-quality	100	HMM-based (lower-bound)	1
RGVC1878	2022NBT-31	984009	No	872	3	614	High-quality	High-quality	100	HMM-based (lower-bound)	1
RGVC1879	2022NBT-310	884203	No	846	4	591	High-quality	High-quality	100	HMM-based (lower-bound)	1.01
RGVC1880	2022NBT-31004	77456	No	132	3	17	High-quality	High-quality	100	HMM-based (lower-bound)	1
RGVC1881	2022NBT-31007	77450	No	102	2	39	Medium-quality	Genome-fragment	89.09	HMM-based (lower-bound)	1
RGVC1882	2022NBT-3103	441148	No	377	3	229	High-quality	High-quality	100	HMM-based (lower-bound)	1
RGVC1883	2022NBT-31056	77343	No	86	5	32	Medium-quality	Genome-fragment	54.55	HMM-based (lower-bound)	1
RGVC1884	2022NBT-3106_1	45758	Yes	438	16	268	Medium-quality	Genome-fragment	72.89	HMM-based (lower-bound)	1
RGVC1885	2022NBT-31065	77323	No	97	17	2	Medium-quality	Genome-fragment	50.89	AAI-based (high-confidence)	1
RGVC1886	2022NBT-31067	77321	No	174	3	2	Medium-quality	Genome-fragment	85.41	HMM-based (lower-bound)	1
RGVC1887	2022NBT-31068	77319	No	150	1	30	High-quality	High-quality	100	HMM-based (lower-bound)	1
RGVC1888	2022NBT-3107	440860	No	641	5	268	High-quality	High-quality	100	HMM-based (lower-bound)	1
RGVC1889	2022NBT-31084	77276	No	75	1	17	Medium-quality	Genome-fragment	53.41	HMM-based (lower-bound)	1
RGVC1890	2022NBT-311	884030	No	716	3	511	High-quality	High-quality	100	HMM-based (lower-bound)	1
RGVC1891	2022NBT-3110	440486	No	432	4	295	High-quality	High-quality	100	HMM-based (lower-bound)	1
RGVC1892	2022NBT-31107	77235	No	93	2	41	Medium-quality	Genome-fragment	58.75	HMM-based (lower-bound)	1
RGVC1893	2022NBT-31110	77232	No	85	9	16	High-quality	High-quality	96.32	HMM-based (lower-bound)	1
RGVC1894	2022NBT-3116	439972	No	404	1	278	High-quality	High-quality	100	HMM-based (lower-bound)	1
RGVC1895	2022NBT-31197	77065	No	124	3	15	Medium-quality	Genome-fragment	56.37	HMM-based (lower-bound)	1
RGVC1896	2022NBT-312_1	52055	Yes	807	30	479	Complete	High-quality	100	Provirus (medium-confidence)	1
RGVC1897	2022NBT-31205	77046	No	134	19	3	High-quality	High-quality	100	AAI-based (medium-confidence)	1
RGVC1898	2022NBT-31209	77037	No	130	3	48	High-quality	High-quality	100	HMM-based (lower-bound)	1
RGVC1899	2022NBT-31216	77023	No	151	10	4	High-quality	High-quality	100	AAI-based (high-confidence)	1
RGVC1900	2022NBT-3122_1	47322	Yes	489	16	288	Medium-quality	Genome-fragment	77.72	HMM-based (lower-bound)	1
RGVC1901	2022NBT-31248_1	63404	Yes	112	3	17	Medium-quality	Genome-fragment	77.85	HMM-based (lower-bound)	1
RGVC1902	2022NBT-3126_1	42492	Yes	596	6	219	Medium-quality	Genome-fragment	57.06	HMM-based (lower-bound)	1
RGVC1903	2022NBT-31260	76901	No	151	6	10	High-quality	High-quality	98.73	HMM-based (lower-bound)	1
RGVC1904	2022NBT-3127_1	38776	Yes	442	29	221	Medium-quality	Genome-fragment	52.85	HMM-based (lower-bound)	1
RGVC1905	2022NBT-31302	76810	No	118	4	12	High-quality	High-quality	91.84	HMM-based (lower-bound)	1
RGVC1906	2022NBT-31336_1	53862	Yes	129	28	16	High-quality	High-quality	95.7	AAI-based (high-confidence)	1
RGVC1907	2022NBT-31373	76659	No	87	2	57	High-quality	High-quality	99.86	HMM-based (lower-bound)	1
RGVC1908	2022NBT-31382	76646	No	115	2	29	High-quality	High-quality	92.59	HMM-based (lower-bound)	1
RGVC1909	2022NBT-31390	76628	No	83	1	27	Medium-quality	Genome-fragment	69.78	HMM-based (lower-bound)	1
RGVC1910	2022NBT-31448	76484	No	172	5	4	High-quality	High-quality	94.56	HMM-based (lower-bound)	1
RGVC1911	2022NBT-31450_1	22881	Yes	85	12	33	Medium-quality	Genome-fragment	58.55	AAI-based (medium-confidence)	1
RGVC1912	2022NBT-31452	76475	No	76	1	40	High-quality	High-quality	100	HMM-based (lower-bound)	1
RGVC1913	2022NBT-31464	76447	No	113	20	2	Medium-quality	Genome-fragment	82.35	AAI-based (high-confidence)	1
RGVC1914	2022NBT-3148	437569	No	408	3	237	High-quality	High-quality	100	HMM-based (lower-bound)	1
RGVC1915	2022NBT-31519	76332	No	99	14	1	High-quality	High-quality	93.4	AAI-based (medium-confidence)	1
RGVC1916	2022NBT-3152	437298	No	378	15	148	High-quality	High-quality	100	HMM-based (lower-bound)	1
RGVC1917	2022NBT-31549_1	22670	Yes	92	7	22	Medium-quality	Genome-fragment	56.88	AAI-based (medium-confidence)	1
RGVC1918	2022NBT-31554	76267	No	77	0	7	High-quality	High-quality	92.42	AAI-based (medium-confidence)	1
RGVC1919	2022NBT-31573	76227	No	75	2	18	Medium-quality	Genome-fragment	87.69	HMM-based (lower-bound)	1
RGVC1920	2022NBT-31616	76106	No	95	11	0	Medium-quality	Genome-fragment	85.77	HMM-based (lower-bound)	1
RGVC1921	2022NBT-31634_1	66056	Yes	110	8	17	High-quality	High-quality	100	AAI-based (high-confidence)	1
RGVC1922	2022NBT-31653_1	57783	Yes	109	8	16	High-quality	High-quality	100	AAI-based (high-confidence)	1
RGVC1923	2022NBT-31665	76018	No	82	1	18	High-quality	High-quality	100	HMM-based (lower-bound)	1
RGVC1924	2022NBT-31676	76002	No	114	19	0	High-quality	High-quality	100	AAI-based (high-confidence)	1
RGVC1925	2022NBT-3168	435979	No	383	3	264	High-quality	High-quality	100	HMM-based (lower-bound)	1
RGVC1926	2022NBT-31682	75993	No	97	1	63	Medium-quality	Genome-fragment	73.81	HMM-based (lower-bound)	1
RGVC1927	2022NBT-31719	75903	No	63	1	16	Medium-quality	Genome-fragment	87.58	HMM-based (lower-bound)	1
RGVC1928	2022NBT-31721	75900	No	132	32	3	High-quality	High-quality	100	AAI-based (medium-confidence)	1.05
RGVC1929	2022NBT-31726_1	34764	Yes	109	19	37	Complete	High-quality	100	Provirus (high-confidence)	1
RGVC1930	2022NBT-3174	435513	No	389	3	292	High-quality	High-quality	100	HMM-based (lower-bound)	1
RGVC1931	2022NBT-3175	435503	No	348	6	199	High-quality	High-quality	100	HMM-based (lower-bound)	1
RGVC1932	2022NBT-3176_1	125524	Yes	453	10	239	High-quality	High-quality	97.83	HMM-based (lower-bound)	1
RGVC1933	2022NBT-31765	75799	No	106	1	42	Medium-quality	Genome-fragment	87.61	HMM-based (lower-bound)	1
RGVC1934	2022NBT-31767	75793	No	166	8	3	High-quality	High-quality	91.58	HMM-based (lower-bound)	1
RGVC1935	2022NBT-3179	435142	No	395	3	274	High-quality	High-quality	100	HMM-based (lower-bound)	1
RGVC1936	2022NBT-31801	75709	No	79	2	59	Medium-quality	Genome-fragment	65.39	HMM-based (lower-bound)	1
RGVC1937	2022NBT-31812	75683	No	70	3	36	Medium-quality	Genome-fragment	64.75	HMM-based (lower-bound)	1
RGVC1938	2022NBT-31836	75630	No	104	16	5	High-quality	High-quality	100	AAI-based (high-confidence)	1
RGVC1939	2022NBT-3184	434624	No	417	8	217	High-quality	High-quality	100	HMM-based (lower-bound)	1
RGVC1940	2022NBT-3185	434547	No	645	2	282	High-quality	High-quality	100	HMM-based (lower-bound)	1
RGVC1941	2022NBT-3192	434061	No	421	1	219	High-quality	High-quality	100	HMM-based (lower-bound)	1
RGVC1942	2022NBT-31973	75325	No	120	46	1	High-quality	High-quality	100	AAI-based (high-confidence)	1
RGVC1943	2022NBT-31979	75313	No	131	1	22	High-quality	High-quality	100	HMM-based (lower-bound)	1
RGVC1944	2022NBT-31983	75306	No	109	1	19	Medium-quality	Genome-fragment	50.66	HMM-based (lower-bound)	1
RGVC1945	2022NBT-320	882211	No	762	3	430	High-quality	High-quality	100	HMM-based (lower-bound)	1
RGVC1946	2022NBT-32004	75261	No	123	5	27	Medium-quality	Genome-fragment	86.65	HMM-based (lower-bound)	1
RGVC1947	2022NBT-32019_1	67009	Yes	83	24	7	High-quality	High-quality	100	AAI-based (high-confidence)	1
RGVC1948	2022NBT-32027_1	38871	Yes	134	5	22	Complete	High-quality	100	Provirus (high-confidence)	1
RGVC1949	2022NBT-32033_1	67009	Yes	113	14	8	High-quality	High-quality	100	AAI-based (high-confidence)	1
RGVC1950	2022NBT-3205	433353	No	387	4	279	High-quality	High-quality	100	HMM-based (lower-bound)	1
RGVC1951	2022NBT-3206_1	54598	Yes	508	14	251	Medium-quality	Genome-fragment	65.82	HMM-based (lower-bound)	1
RGVC1952	2022NBT-32069	75123	No	138	15	0	High-quality	High-quality	100	AAI-based (high-confidence)	1
RGVC1953	2022NBT-32071	75121	No	84	3	47	High-quality	High-quality	100	HMM-based (lower-bound)	1
RGVC1954	2022NBT-32097	75071	No	135	9	2	Complete	High-quality	100	DTR (high-confidence)	1
RGVC1955	2022NBT-3211	432743	No	482	3	259	High-quality	High-quality	100	HMM-based (lower-bound)	1.08
RGVC1956	2022NBT-32128	75021	No	101	37	0	High-quality	High-quality	100	AAI-based (high-confidence)	1
RGVC1957	2022NBT-3214_1	46789	Yes	432	14	244	Medium-quality	Genome-fragment	60.58	HMM-based (lower-bound)	1
RGVC1958	2022NBT-3216	432010	No	445	5	214	High-quality	High-quality	100	HMM-based (lower-bound)	1
RGVC1959	2022NBT-3218	431834	No	380	1	247	High-quality	High-quality	100	HMM-based (lower-bound)	1
RGVC1960	2022NBT-32199	74849	No	96	3	27	Medium-quality	Genome-fragment	53.26	HMM-based (lower-bound)	1
RGVC1961	2022NBT-322	881915	No	871	8	577	High-quality	High-quality	100	HMM-based (lower-bound)	1
RGVC1962	2022NBT-32212_1	62860	Yes	76	5	6	Medium-quality	Genome-fragment	87.46	HMM-based (lower-bound)	1
RGVC1963	2022NBT-32244	74744	No	56	0	12	High-quality	High-quality	100	AAI-based (high-confidence)	1
RGVC1964	2022NBT-3225	431347	No	422	2	272	High-quality	High-quality	100	HMM-based (lower-bound)	1
RGVC1965	2022NBT-3226_1	54768	Yes	416	25	225	Medium-quality	Genome-fragment	76.7	HMM-based (lower-bound)	1
RGVC1966	2022NBT-32271	74672	No	94	1	18	High-quality	High-quality	92.42	HMM-based (lower-bound)	1
RGVC1967	2022NBT-32273	74662	No	131	13	2	Medium-quality	Genome-fragment	55.37	HMM-based (lower-bound)	1.49
RGVC1968	2022NBT-32292	74612	No	126	23	1	Medium-quality	Genome-fragment	87.08	HMM-based (lower-bound)	1.49
RGVC1969	2022NBT-32319	74549	No	104	1	34	High-quality	High-quality	92.27	HMM-based (lower-bound)	1
RGVC1970	2022NBT-32379	74422	No	130	2	13	Medium-quality	Genome-fragment	80.76	HMM-based (lower-bound)	1
RGVC1971	2022NBT-3239_1	38467	Yes	410	16	237	Medium-quality	Genome-fragment	65.26	HMM-based (lower-bound)	1
RGVC1972	2022NBT-32392_1	35877	Yes	85	5	32	Medium-quality	Genome-fragment	85.45	AAI-based (medium-confidence)	1
RGVC1973	2022NBT-324	880590	No	819	2	640	High-quality	High-quality	100	HMM-based (lower-bound)	1
RGVC1974	2022NBT-32431	74316	No	107	35	0	High-quality	High-quality	95.8	HMM-based (lower-bound)	1.27
RGVC1975	2022NBT-32443_1	73081	Yes	113	16	2	High-quality	High-quality	92	HMM-based (lower-bound)	1
RGVC1976	2022NBT-32464	74246	No	119	15	0	Complete	High-quality	100	DTR (high-confidence)	1
RGVC1977	2022NBT-32489	74191	No	83	29	1	High-quality	High-quality	100	AAI-based (medium-confidence)	1
RGVC1978	2022NBT-32503_1	33766	Yes	93	22	21	Complete	High-quality	100	Provirus (high-confidence)	1
RGVC1979	2022NBT-32504	74162	No	97	2	24	Medium-quality	Genome-fragment	89.71	HMM-based (lower-bound)	1
RGVC1980	2022NBT-32566	74058	No	138	5	10	Medium-quality	Genome-fragment	84.6	HMM-based (lower-bound)	1
RGVC1981	2022NBT-32569	74052	No	80	2	22	High-quality	High-quality	92.35	HMM-based (lower-bound)	1
RGVC1982	2022NBT-3258	429774	No	434	5	227	High-quality	High-quality	100	HMM-based (lower-bound)	1
RGVC1983	2022NBT-32597	74005	No	81	5	13	Medium-quality	Genome-fragment	79.25	HMM-based (lower-bound)	1
RGVC1984	2022NBT-32638	73928	No	119	13	1	High-quality	High-quality	100	AAI-based (medium-confidence)	1
RGVC1985	2022NBT-3265	429052	No	599	4	176	High-quality	High-quality	100	HMM-based (lower-bound)	1
RGVC1986	2022NBT-32673	73868	No	92	2	11	High-quality	High-quality	100	HMM-based (lower-bound)	1
RGVC1987	2022NBT-32682_1	37034	Yes	109	18	24	Medium-quality	Genome-fragment	57.88	HMM-based (lower-bound)	1
RGVC1988	2022NBT-32690	73838	No	102	12	1	Complete	High-quality	100	DTR (medium-confidence)	1
RGVC1989	2022NBT-32703_1	70128	Yes	111	20	15	High-quality	High-quality	100	AAI-based (high-confidence)	1
RGVC1990	2022NBT-32711_1	44871	Yes	107	12	25	High-quality	High-quality	97.48	AAI-based (high-confidence)	1
RGVC1991	2022NBT-32716	73776	No	91	18	4	High-quality	High-quality	100	AAI-based (high-confidence)	1.25
RGVC1992	2022NBT-3272	428684	No	426	1	285	High-quality	High-quality	100	HMM-based (lower-bound)	1
RGVC1993	2022NBT-32736	73736	No	91	5	50	Medium-quality	Genome-fragment	79.52	HMM-based (lower-bound)	1
RGVC1994	2022NBT-32741	73725	No	126	7	19	High-quality	High-quality	93.49	HMM-based (lower-bound)	1
RGVC1995	2022NBT-32751	73712	No	87	1	26	Medium-quality	Genome-fragment	65.56	HMM-based (lower-bound)	1
RGVC1996	2022NBT-32806	73598	No	69	4	31	High-quality	High-quality	95.77	HMM-based (lower-bound)	1
RGVC1997	2022NBT-3286_1	33545	Yes	412	14	262	Medium-quality	Genome-fragment	65.9	HMM-based (lower-bound)	1
RGVC1998	2022NBT-3287	428020	No	371	5	243	High-quality	High-quality	100	HMM-based (lower-bound)	1
[truncated: 41,983 more rows]
