# Supplementary material for: Spatial heterogeneity of viral communities across the gastrointestinal tracts of ruminants
Source: Research Square preprint supplement (doi:10.21203/rs.3.rs-4244627/v1), 2024-04-10
Supplement: Supplementary file 14 [file d225c15aaff429b96a3ac3be.xlsx]

## Sheet: Table S22
Table S22. List of AMGs identified by DRAM-v
Gene	Genome	Gene ID	Gene Description	Category	Header	Subheader	Module	Auxiliary Score	AMG Flags
2022NBT-10190_1_27	RGVC30	K00558	DNA (cytosine-5-)-methyltransferase [EC:2.1.1.37] [RN:R04858]	Organic Nitrogen	Amino Acid		Methionine degradation	2	M
2022NBT-10281_130	RGVC46							1	MK
2022NBT-10281_238	RGVC46							1	MK
2022NBT-10281_260	RGVC46							1	MK
2022NBT-10281_27	RGVC46	K01520	dUTP pyrophosphatase [EC:3.6.1.23] [RN:R02100]	MISC	Information systems	Nucleotide	Pyrimidine deoxyribonuleotide biosynthesis, CDP/CTP => dCDP/dCTP,dTDP/dTTP	2	M
2022NBT-10281_275	RGVC46							1	MK
2022NBT-10288_114	RGVC48							1	M
2022NBT-10288_115	RGVC48							1	M
2022NBT-10288_123	RGVC48							1	MK
2022NBT-10288_133	RGVC48							1	MKE
2022NBT-10288_141	RGVC48	K00558	DNA (cytosine-5-)-methyltransferase [EC:2.1.1.37] [RN:R04858]	Organic Nitrogen	Amino Acid		Methionine degradation	2	M
2022NBT-10321_113	RGVC52	K00560	thymidylate synthase [EC:2.1.1.45] [RN:R02101]	MISC	Information systems	Nucleotide	Pyrimidine deoxyribonuleotide biosynthesis, CDP/CTP => dCDP/dCTP,dTDP/dTTP	1	M
2022NBT-10321_129	RGVC52							1	MK
2022NBT-10321_130	RGVC52							1	MK
2022NBT-10321_146	RGVC52							1	MK
2022NBT-10321_82	RGVC52	K01520	dUTP pyrophosphatase [EC:3.6.1.23] [RN:R02100]	MISC	Information systems	Nucleotide	Pyrimidine deoxyribonuleotide biosynthesis, CDP/CTP => dCDP/dCTP,dTDP/dTTP	1	M
2022NBT-10354_1_25	RGVC57	K00558	DNA (cytosine-5-)-methyltransferase [EC:2.1.1.37] [RN:R04858]	Organic Nitrogen	Amino Acid		Methionine degradation	1	M
2022NBT-10790_236	RGVC134	C110	Catlytic type: Cysteine	Organic Nitrogen	Peptidase		Cysteine endopeptidases	2	M
2022NBT-10790_237	RGVC134	M26	Catlytic type: Metallo; cleaves the heavy chain of human IgA1 at the Pro227-Thr228 bond; tightly associated with the bacterial cell surface	Organic Nitrogen	Peptidase		Endopeptidases	2	M
2022NBT-10800_1_140	RGVC140							2	M
2022NBT-10800_1_188	RGVC140	K00789	S-adenosylmethionine synthetase [EC:2.5.1.6] [RN:R00177]	Organic Nitrogen	Amino Acid		Methionine degradation	2	M
2022NBT-10800_1_56	RGVC140							1	MK
2022NBT-11263_32	RGVC203							2	MK
2022NBT-11263_33	RGVC203							2	MK
2022NBT-11296_1_96	RGVC207	K02968	small subunit ribosomal protein S20	MISC	Information systems		Ribosome, bacteria	2	M
2022NBT-11334_5	RGVC212							2	MKF
2022NBT-1136_1_19	RGVC215	K00789	S-adenosylmethionine synthetase [EC:2.5.1.6] [RN:R00177]	Organic Nitrogen	Amino Acid		Methionine degradation	2	M
2022NBT-12369_109	RGVC338	K02003	ABC.CD.A;	Transporters			Putative ABC transport system	2	M
2022NBT-12369_110	RGVC338	K01520	dUTP pyrophosphatase [EC:3.6.1.23] [RN:R02100]	MISC	Information systems	Nucleotide	Pyrimidine deoxyribonuleotide biosynthesis, CDP/CTP => dCDP/dCTP,dTDP/dTTP	2	M
2022NBT-12369_113	RGVC338	K02939	large subunit ribosomal protein L9	MISC	Information systems		Ribosome, bacteria	2	M
2022NBT-12369_123	RGVC338							2	MK
2022NBT-12369_98	RGVC338	K04069	pyruvate formate lyase activating enzyme	carbon utilization	pyruvate metabolism		pyruvate metabolism	2	M
2022NBT-12369_99	RGVC338	K21636	ribonucleoside-triphosphate reductase [EC:1.17.4.2 1.1.98.6] [RN:R02022 R11636]	MISC	Information systems	Nucleotide	Pyrimidine deoxyribonuleotide biosynthesis, CDP/CTP => dCDP/dCTP,dTDP/dTTP	2	MKE
2022NBT-12980_120	RGVC415							1	MK
2022NBT-12980_68	RGVC415							1	MK
2022NBT-12980_69	RGVC415	K00560	thymidylate synthase [EC:2.1.1.45] [RN:R02101]	MISC	Information systems	Nucleotide	Pyrimidine deoxyribonuleotide biosynthesis, CDP/CTP => dCDP/dCTP,dTDP/dTTP	1	M
2022NBT-12980_76	RGVC415	K01520	dUTP pyrophosphatase [EC:3.6.1.23] [RN:R02100]	MISC	Information systems	Nucleotide	Pyrimidine deoxyribonuleotide biosynthesis, CDP/CTP => dCDP/dCTP,dTDP/dTTP	1	M
2022NBT-12980_80	RGVC415	K21636	ribonucleoside-triphosphate reductase [EC:1.17.4.2 1.1.98.6] [RN:R02022 R11636]	MISC	Information systems	Nucleotide	Pyrimidine deoxyribonuleotide biosynthesis, CDP/CTP => dCDP/dCTP,dTDP/dTTP	1	M
2022NBT-12980_88	RGVC415	K00789	S-adenosylmethionine synthetase [EC:2.5.1.6] [RN:R00177]	Organic Nitrogen	Amino Acid		Methionine degradation	1	M
2022NBT-13209_90	RGVC438							2	M
2022NBT-13925_149	RGVC518							1	MK
2022NBT-13925_173	RGVC518							1	MK
2022NBT-13925_188	RGVC518							1	MK
2022NBT-13925_211	RGVC518	K00560	thymidylate synthase [EC:2.1.1.45] [RN:R02101]	MISC	Information systems	Nucleotide	Pyrimidine deoxyribonuleotide biosynthesis, CDP/CTP => dCDP/dCTP,dTDP/dTTP	2	M
2022NBT-13925_240	RGVC518	K01520	dUTP pyrophosphatase [EC:3.6.1.23] [RN:R02100]	MISC	Information systems	Nucleotide	Pyrimidine deoxyribonuleotide biosynthesis, CDP/CTP => dCDP/dCTP,dTDP/dTTP	2	M
2022NBT-13925_38	RGVC518							1	MK
2022NBT-14169_1_106	RGVC551	K01520	dUTP pyrophosphatase [EC:3.6.1.23] [RN:R02100]	MISC	Information systems	Nucleotide	Pyrimidine deoxyribonuleotide biosynthesis, CDP/CTP => dCDP/dCTP,dTDP/dTTP	2	M
2022NBT-1446_1_33	RGVC577	K00558	DNA (cytosine-5-)-methyltransferase [EC:2.1.1.37] [RN:R04858]	Organic Nitrogen	Amino Acid		Methionine degradation	2	M
2022NBT-1446_1_9	RGVC577	K02003	ABC.CD.A;	Transporters			Putative ABC transport system	2	M
2022NBT-1654_1_111	RGVC796	K00558	DNA (cytosine-5-)-methyltransferase [EC:2.1.1.37] [RN:R04858]	Organic Nitrogen	Amino Acid		Methionine degradation	1	M
2022NBT-1654_1_25	RGVC796	K00558	DNA (cytosine-5-)-methyltransferase [EC:2.1.1.37] [RN:R04858]	Organic Nitrogen	Amino Acid		Methionine degradation	1	M
2022NBT-1717_1_47	RGVC851	K00558	DNA (cytosine-5-)-methyltransferase [EC:2.1.1.37] [RN:R04858]	Organic Nitrogen	Amino Acid		Methionine degradation	2	M
2022NBT-17337_45	RGVC862							2	MK
2022NBT-1736_1_60	RGVC866	K00558	DNA (cytosine-5-)-methyltransferase [EC:2.1.1.37] [RN:R04858]	Organic Nitrogen	Amino Acid		Methionine degradation	2	MF
2022NBT-17886_29	RGVC913							2	M
2022NBT-17886_31	RGVC913							2	MK
2022NBT-17886_33	RGVC913	K02968	small subunit ribosomal protein S20	MISC	Information systems		Ribosome, bacteria	2	M
2022NBT-17886_36	RGVC913							2	M
2022NBT-17886_70	RGVC913	M18	Catlytic type: Metallo; acting on N-terminal leucine and most other amino acids	Organic Nitrogen	Peptidase		Metalloaminopeptidases	2	M
2022NBT-17886_71	RGVC913	M18	Catlytic type: Metallo; acting on N-terminal leucine and most other amino acids	Organic Nitrogen	Peptidase		Metalloaminopeptidases	2	M
2022NBT-17895_1_95	RGVC915	K00558	DNA (cytosine-5-)-methyltransferase [EC:2.1.1.37] [RN:R04858]	Organic Nitrogen	Amino Acid		Methionine degradation	1	M
2022NBT-17971_18	RGVC922	K02967	small subunit ribosomal protein S2	MISC	Information systems		Ribosome, archaea	2	M
2022NBT-17971_21	RGVC922							2	MK
2022NBT-17971_58	RGVC922	K00891	shikimate kinase [EC:2.7.1.71] [RN:R02412]	Organic Nitrogen	Amino Acid		Shikimate pathway, phosphoenolpyruvate + erythrose-4P => chorismate	1	M
2022NBT-17971_63	RGVC922	K00088	IMP dehydrogenase [EC:1.1.1.205] [RN:R01130]	MISC	Information systems	Nucleotide	Guanine ribonucleotide biosynthesis IMP => GDP,GTP	1	M
2022NBT-1827_231	RGVC946	K02004	ABC.CD.P;	Transporters			Putative ABC transport system	1	M
2022NBT-1827_232	RGVC946	K02003	ABC.CD.A;	Transporters			Putative ABC transport system	1	M
2022NBT-1840_1_15	RGVC959	K01520	dUTP pyrophosphatase [EC:3.6.1.23] [RN:R02100]	MISC	Information systems	Nucleotide	Pyrimidine deoxyribonuleotide biosynthesis, CDP/CTP => dCDP/dCTP,dTDP/dTTP	2	M
2022NBT-18403_18	RGVC960							2	MK
2022NBT-18403_53	RGVC960	C110	Catlytic type: Cysteine	Organic Nitrogen	Peptidase		Cysteine endopeptidases	2	M
2022NBT-18403_57	RGVC960							2	MK
2022NBT-18403_62	RGVC960	K02899	large subunit ribosomal protein L27	MISC	Information systems		Ribosome, bacteria	2	M
2022NBT-18403_68	RGVC960							2	MK
2022NBT-18403_76	RGVC960							2	MK
2022NBT-18403_84	RGVC960	K01810	glucose-6-phosphate isomerase [EC:5.3.1.9] [RN:R02740]	carbon utilization	central carbon	glycolysis	Glycolysis (Embden-Meyerhof pathway), glucose => pyruvate	2	M
2022NBT-18403_88	RGVC960							2	MK
2022NBT-18762_136	RGVC1000							2	MK
2022NBT-18762_161	RGVC1000							1	MK
2022NBT-18889_61	RGVC1013							2	M
2022NBT-18889_75	RGVC1013							2	M
2022NBT-19037_41	RGVC1020	K21636	ribonucleoside-triphosphate reductase [EC:1.17.4.2 1.1.98.6] [RN:R02022 R11636]	MISC	Information systems	Nucleotide	Pyrimidine deoxyribonuleotide biosynthesis, CDP/CTP => dCDP/dCTP,dTDP/dTTP	2	MKE
2022NBT-19037_44	RGVC1020	K01520	dUTP pyrophosphatase [EC:3.6.1.23] [RN:R02100]	MISC	Information systems	Nucleotide	Pyrimidine deoxyribonuleotide biosynthesis, CDP/CTP => dCDP/dCTP,dTDP/dTTP	2	M
2022NBT-19066_1_30	RGVC1026	K01006	pyruvate,orthophosphate dikinase [EC:2.7.9.1] [RN:R00206]	Energy	C1		Reductive citrate cycle (Arnon-Buchanan cycle)	2	MK
2022NBT-19066_1_62	RGVC1026	K00558	DNA (cytosine-5-)-methyltransferase [EC:2.1.1.37] [RN:R04858]	Organic Nitrogen	Amino Acid		Methionine degradation	2	M
2022NBT-19273_27	RGVC1048	K21636	ribonucleoside-triphosphate reductase [EC:1.17.4.2 1.1.98.6] [RN:R02022 R11636]	MISC	Information systems	Nucleotide	Pyrimidine deoxyribonuleotide biosynthesis, CDP/CTP => dCDP/dCTP,dTDP/dTTP	2	M
2022NBT-19890_76	RGVC1091							2	MK
2022NBT-19890_81	RGVC1091							2	MK
2022NBT-19890_93	RGVC1091							2	MK
2022NBT-20215_52	RGVC1118	K21636	ribonucleoside-triphosphate reductase [EC:1.17.4.2 1.1.98.6] [RN:R02022 R11636]	MISC	Information systems	Nucleotide	Pyrimidine deoxyribonuleotide biosynthesis, CDP/CTP => dCDP/dCTP,dTDP/dTTP	1	M
2022NBT-20215_55	RGVC1118	K21636	ribonucleoside-triphosphate reductase [EC:1.17.4.2 1.1.98.6] [RN:R02022 R11636]	MISC	Information systems	Nucleotide	Pyrimidine deoxyribonuleotide biosynthesis, CDP/CTP => dCDP/dCTP,dTDP/dTTP	1	MKE
2022NBT-20215_72	RGVC1118	K02114	ATPF1E; F-type H+-transporting ATPase subunit epsilon	Energy	Electron transport Chain		F-type ATPase, prokaryotes and chloroplasts	1	M
2022NBT-20237_1_43	RGVC1119	K00558	DNA (cytosine-5-)-methyltransferase [EC:2.1.1.37] [RN:R04858]	Organic Nitrogen	Amino Acid		Methionine degradation	2	M
2022NBT-20237_1_45	RGVC1119	K00789	S-adenosylmethionine synthetase [EC:2.5.1.6] [RN:R00177]	Organic Nitrogen	Amino Acid		Methionine degradation	2	M
2022NBT-20246_35	RGVC1121							2	MK
2022NBT-20246_39	RGVC1121							2	MK
2022NBT-20246_61	RGVC1121	K00558	DNA (cytosine-5-)-methyltransferase [EC:2.1.1.37] [RN:R04858]	Organic Nitrogen	Amino Acid		Methionine degradation	2	M
2022NBT-20246_63	RGVC1121	K00558	DNA (cytosine-5-)-methyltransferase [EC:2.1.1.37] [RN:R04858]	Organic Nitrogen	Amino Acid		Methionine degradation	2	M
2022NBT-20246_90	RGVC1121	K00558	DNA (cytosine-5-)-methyltransferase [EC:2.1.1.37] [RN:R04858]	Organic Nitrogen	Amino Acid		Methionine degradation	1	M
2022NBT-20463_1_45	RGVC1137	K00558	DNA (cytosine-5-)-methyltransferase [EC:2.1.1.37] [RN:R04858]	Organic Nitrogen	Amino Acid		Methionine degradation	1	M
2022NBT-20463_1_63	RGVC1137	K00789	S-adenosylmethionine synthetase [EC:2.5.1.6] [RN:R00177]	Organic Nitrogen	Amino Acid		Methionine degradation	2	M
2022NBT-20804_83	RGVC1177							2	M
2022NBT-21354_104	RGVC1210	K02412	flagellum-specific ATP synthase [EC:7.4.2.8]	MISC	Flagella Structure		Flagellar Assembly	2	M
2022NBT-21354_108	RGVC1210	K02410	flagellar motor switch protein FliG	MISC	Flagella Structure		Flagellar Assembly	2	M
2022NBT-21354_109	RGVC1210	K02410	flagellar motor switch protein FliG	MISC	Flagella Structure		Flagellar Assembly	2	M
2022NBT-21354_114	RGVC1210	K02408	flagellar hook-basal body complex protein FliE	MISC	Flagella Structure		Flagellar Assembly	2	M
2022NBT-21354_137	RGVC1210							2	MK
2022NBT-21354_138	RGVC1210							2	MK
2022NBT-21354_143	RGVC1210							2	MKE
2022NBT-21354_146	RGVC1210							2	M
2022NBT-21354_152	RGVC1210	K02406	flagellin	MISC	Flagella Structure		Flagellar Assembly	2	MF
2022NBT-21354_153	RGVC1210	K02406	flagellin	MISC	Flagella Structure		Flagellar Assembly	2	MF
2022NBT-21354_22	RGVC1210	K02967	small subunit ribosomal protein S2	MISC	Information systems		Ribosome, archaea	2	M
2022NBT-21354_25	RGVC1210							2	MK
2022NBT-21354_82	RGVC1210	K00891	shikimate kinase [EC:2.7.1.71] [RN:R02412]	Organic Nitrogen	Amino Acid		Shikimate pathway, phosphoenolpyruvate + erythrose-4P => chorismate	1	M
2022NBT-21569_17	RGVC1229							2	MK
2022NBT-21569_18	RGVC1229							2	MKE
2022NBT-21569_24	RGVC1229							2	MK
2022NBT-21569_25	RGVC1229							2	MKE
2022NBT-21569_30	RGVC1229	K21636	ribonucleoside-triphosphate reductase [EC:1.17.4.2 1.1.98.6] [RN:R02022 R11636]	MISC	Information systems	Nucleotide	Pyrimidine deoxyribonuleotide biosynthesis, CDP/CTP => dCDP/dCTP,dTDP/dTTP	2	M
2022NBT-21569_35	RGVC1229	K01520	dUTP pyrophosphatase [EC:3.6.1.23] [RN:R02100]	MISC	Information systems	Nucleotide	Pyrimidine deoxyribonuleotide biosynthesis, CDP/CTP => dCDP/dCTP,dTDP/dTTP	2	M
2022NBT-21569_40	RGVC1229							2	MK
2022NBT-21569_41	RGVC1229							2	MKE
2022NBT-21569_54	RGVC1229	K01520	dUTP pyrophosphatase [EC:3.6.1.23] [RN:R02100]	MISC	Information systems	Nucleotide	Pyrimidine deoxyribonuleotide biosynthesis, CDP/CTP => dCDP/dCTP,dTDP/dTTP	2	M
2022NBT-21599_1_44	RGVC1233	K00558	DNA (cytosine-5-)-methyltransferase [EC:2.1.1.37] [RN:R04858]	Organic Nitrogen	Amino Acid		Methionine degradation	2	M
2022NBT-21755_132	RGVC1241	K05833	ABC.X4.A; putative ABC transport system ATP-binding protein	Transporters			Putative ABC transport system	2	M
2022NBT-21956_1_94	RGVC1259	K00558	DNA (cytosine-5-)-methyltransferase [EC:2.1.1.37] [RN:R04858]	Organic Nitrogen	Amino Acid		Methionine degradation	1	M
2022NBT-22341_98	RGVC1296							2	MK
2022NBT-22732_21	RGVC1322	K01520	dUTP pyrophosphatase [EC:3.6.1.23] [RN:R02100]	MISC	Information systems	Nucleotide	Pyrimidine deoxyribonuleotide biosynthesis, CDP/CTP => dCDP/dCTP,dTDP/dTTP	2	M
2022NBT-22732_23	RGVC1322	K01520	dUTP pyrophosphatase [EC:3.6.1.23] [RN:R02100]	MISC	Information systems	Nucleotide	Pyrimidine deoxyribonuleotide biosynthesis, CDP/CTP => dCDP/dCTP,dTDP/dTTP	2	M
2022NBT-22732_6	RGVC1322							2	MK
2022NBT-22732_7	RGVC1322	K21636	ribonucleoside-triphosphate reductase [EC:1.17.4.2 1.1.98.6] [RN:R02022 R11636]	MISC	Information systems	Nucleotide	Pyrimidine deoxyribonuleotide biosynthesis, CDP/CTP => dCDP/dCTP,dTDP/dTTP	2	MKE
2022NBT-22859_106	RGVC1330	K00558	DNA (cytosine-5-)-methyltransferase [EC:2.1.1.37] [RN:R04858]	Organic Nitrogen	Amino Acid		Methionine degradation	2	M
2022NBT-237_1_39	RGVC1394	K21636	ribonucleoside-triphosphate reductase [EC:1.17.4.2 1.1.98.6] [RN:R02022 R11636]	MISC	Information systems	Nucleotide	Pyrimidine deoxyribonuleotide biosynthesis, CDP/CTP => dCDP/dCTP,dTDP/dTTP	2	M
2022NBT-237_1_43	RGVC1394							2	MK
2022NBT-24067_22	RGVC1421	K02028	ABC.PA.A; polar amino acid transport system ATP-binding protein [EC:7.4.2.1]	Transporters			Putative polar amino acid transport system	1	M
2022NBT-24067_23	RGVC1421	K02029	ABC.PA.P; polar amino acid transport system permease protein	Transporters			Putative polar amino acid transport system	1	M
2022NBT-24100_30	RGVC1426							2	MK
2022NBT-24100_37	RGVC1426							2	MK
2022NBT-24243_75	RGVC1436							2	MK
2022NBT-24243_83	RGVC1436							2	MK
2022NBT-24243_86	RGVC1436							2	M
2022NBT-24243_99	RGVC1436	K02034	ABC.PE.P1; peptide/nickel transport system permease protein	Transporters			Peptides/nickel transport system	2	M
2022NBT-24250_109	RGVC1437							2	MK
2022NBT-24250_98	RGVC1437							2	M
2022NBT-25352_1_32	RGVC1511							2	MKF
2022NBT-262_1_46	RGVC1571	K00826	branched-chain amino acid aminotransferase [EC:2.6.1.42] [RN:R02199]	Organic Nitrogen	Amino Acid		Isoleucine biosynthesis, threonine => 2-oxobutanoate => isoleucine	2	MF
2022NBT-26414_77	RGVC1587	K01520	dUTP pyrophosphatase [EC:3.6.1.23] [RN:R02100]	MISC	Information systems	Nucleotide	Pyrimidine deoxyribonuleotide biosynthesis, CDP/CTP => dCDP/dCTP,dTDP/dTTP	2	M
2022NBT-27043_1_48	RGVC1628							1	MK
2022NBT-27341_108	RGVC1645	K00558	DNA (cytosine-5-)-methyltransferase [EC:2.1.1.37] [RN:R04858]	Organic Nitrogen	Amino Acid		Methionine degradation	1	M
2022NBT-27736_1_37	RGVC1668	K01520	dUTP pyrophosphatase [EC:3.6.1.23] [RN:R02100]	MISC	Information systems	Nucleotide	Pyrimidine deoxyribonuleotide biosynthesis, CDP/CTP => dCDP/dCTP,dTDP/dTTP	1	M
2022NBT-28160_17	RGVC1697							2	MK
2022NBT-28160_52	RGVC1697	K02967	small subunit ribosomal protein S2	MISC	Information systems		Ribosome, archaea	2	M
2022NBT-28160_56	RGVC1697							2	MK
2022NBT-28160_9	RGVC1697	K00558	DNA (cytosine-5-)-methyltransferase [EC:2.1.1.37] [RN:R04858]	Organic Nitrogen	Amino Acid		Methionine degradation	2	M
2022NBT-2886_1_54	RGVC1742	K00850	6-phosphofructokinase [EC:2.7.1.11] [RN:R04779]	carbon utilization	central carbon	glycolysis	Glycolysis (Embden-Meyerhof pathway), glucose => pyruvate	2	MF
2022NBT-2995_1_100	RGVC1816	K00558	DNA (cytosine-5-)-methyltransferase [EC:2.1.1.37] [RN:R04858]	Organic Nitrogen	Amino Acid		Methionine degradation	1	M
2022NBT-2995_1_81	RGVC1816	K00558	DNA (cytosine-5-)-methyltransferase [EC:2.1.1.37] [RN:R04858]	Organic Nitrogen	Amino Acid		Methionine degradation	1	M
2022NBT-2995_1_82	RGVC1816	K00558	DNA (cytosine-5-)-methyltransferase [EC:2.1.1.37] [RN:R04858]	Organic Nitrogen	Amino Acid		Methionine degradation	1	M
2022NBT-2995_1_98	RGVC1816	K00789	S-adenosylmethionine synthetase [EC:2.5.1.6] [RN:R00177]	Organic Nitrogen	Amino Acid		Methionine degradation	1	M
2022NBT-3106_1_52	RGVC1884	K00558	DNA (cytosine-5-)-methyltransferase [EC:2.1.1.37] [RN:R04858]	Organic Nitrogen	Amino Acid		Methionine degradation	2	M
2022NBT-32716_65	RGVC1991							2	MK
2022NBT-32716_67	RGVC1991	K00558	DNA (cytosine-5-)-methyltransferase [EC:2.1.1.37] [RN:R04858]	Organic Nitrogen	Amino Acid		Methionine degradation	2	M
2022NBT-32806_13	RGVC1996	I39	interact with endopeptidases regardless of catalytic type	Organic Nitrogen	Peptidase		Mammalian alpha-macroglobulin and other large homologous proteins that interact with endopeptidases regardless of catalytic type	2	M
2022NBT-32806_18	RGVC1996	I39	interact with endopeptidases regardless of catalytic type	Organic Nitrogen	Peptidase		Mammalian alpha-macroglobulin and other large homologous proteins that interact with endopeptidases regardless of catalytic type	2	M
2022NBT-32806_22	RGVC1996	I39	interact with endopeptidases regardless of catalytic type	Organic Nitrogen	Peptidase		Mammalian alpha-macroglobulin and other large homologous proteins that interact with endopeptidases regardless of catalytic type	2	M
2022NBT-34062_69	RGVC2070	K02888	large subunit ribosomal protein L21	MISC	Information systems		Ribosome, bacteria	2	M
2022NBT-3464_235	RGVC2107							1	MK
2022NBT-3464_260	RGVC2107							1	MK
2022NBT-3464_30	RGVC2107							1	MK
2022NBT-3464_300	RGVC2107							1	MK
2022NBT-3464_359	RGVC2107	C10	Catlytic type: Cysteine; broad specificity with a hydrophobic residue in the P2 position	Organic Nitrogen	Peptidase		Bacterial cysteine endopeptidases	1	M
2022NBT-3464_455	RGVC2107	K21636	ribonucleoside-triphosphate reductase [EC:1.17.4.2 1.1.98.6] [RN:R02022 R11636]	MISC	Information systems	Nucleotide	Pyrimidine deoxyribonuleotide biosynthesis, CDP/CTP => dCDP/dCTP,dTDP/dTTP	1	MKE
2022NBT-35030_49	RGVC2133							2	MK
2022NBT-36876_24	RGVC2234							1	M
2022NBT-38058_45	RGVC2298	K00558	DNA (cytosine-5-)-methyltransferase [EC:2.1.1.37] [RN:R04858]	Organic Nitrogen	Amino Acid		Methionine degradation	1	M
2022NBT-38695_1_31	RGVC2338	K00558	DNA (cytosine-5-)-methyltransferase [EC:2.1.1.37] [RN:R04858]	Organic Nitrogen	Amino Acid		Methionine degradation	2	M
2022NBT-389_601	RGVC2347							2	MK
2022NBT-38970_62	RGVC2349	K00558	DNA (cytosine-5-)-methyltransferase [EC:2.1.1.37] [RN:R04858]	Organic Nitrogen	Amino Acid		Methionine degradation	2	M
2022NBT-404_1_34	RGVC2429	K00558	DNA (cytosine-5-)-methyltransferase [EC:2.1.1.37] [RN:R04858]	Organic Nitrogen	Amino Acid		Methionine degradation	2	M
2022NBT-40601_39	RGVC2444							2	MK
2022NBT-41880_10	RGVC2531	K00012	UDPglucose 6-dehydrogenase [EC:1.1.1.22] [RN:R00286]	MISC	MISC		Glucuronate pathway (uronate pathway)	2	MK
2022NBT-42185_1_26	RGVC2547	K00558	DNA (cytosine-5-)-methyltransferase [EC:2.1.1.37] [RN:R04858]	Organic Nitrogen	Amino Acid		Methionine degradation	2	M
2022NBT-42598_1_32	RGVC2568	K01809	mannose-6-phosphate isomerase	carbon utilization (Woodcroft)	sugar utilization (woodcroft)	mannose degradation	Fructose and mannose metabolism	2	MK
2022NBT-42598_1_33	RGVC2568							2	MK
2022NBT-42600_1_51	RGVC2570	K00789	S-adenosylmethionine synthetase [EC:2.5.1.6] [RN:R00177]	Organic Nitrogen	Amino Acid		Methionine degradation	1	M
2022NBT-43011_42	RGVC2602							1	MK
2022NBT-43011_45	RGVC2602							1	MK
2022NBT-4325_57	RGVC2616							2	M
2022NBT-4389_134	RGVC2664							1	MK
2022NBT-4389_247	RGVC2664							2	M
2022NBT-4389_407	RGVC2664							2	MK
2022NBT-4389_68	RGVC2664	K01520	dUTP pyrophosphatase [EC:3.6.1.23] [RN:R02100]	MISC	Information systems	Nucleotide	Pyrimidine deoxyribonuleotide biosynthesis, CDP/CTP => dCDP/dCTP,dTDP/dTTP	1	M
2022NBT-4389_69	RGVC2664	K01520	dUTP pyrophosphatase [EC:3.6.1.23] [RN:R02100]	MISC	Information systems	Nucleotide	Pyrimidine deoxyribonuleotide biosynthesis, CDP/CTP => dCDP/dCTP,dTDP/dTTP	1	M
2022NBT-4389_97	RGVC2664	K21636	ribonucleoside-triphosphate reductase [EC:1.17.4.2 1.1.98.6] [RN:R02022 R11636]	MISC	Information systems	Nucleotide	Pyrimidine deoxyribonuleotide biosynthesis, CDP/CTP => dCDP/dCTP,dTDP/dTTP	1	MKE
2022NBT-4464_241	RGVC2706							2	MK
2022NBT-4464_261	RGVC2706							2	MK
2022NBT-44813_1_33	RGVC2717							2	MK
2022NBT-49830_18	RGVC2997	K00558	DNA (cytosine-5-)-methyltransferase [EC:2.1.1.37] [RN:R04858]	Organic Nitrogen	Amino Acid		Methionine degradation	2	M
2022NBT-5023_120	RGVC3011							2	MK
2022NBT-5023_121	RGVC3011	K01190	beta-galactosidase	carbon utilization (Woodcroft)	sugar utilization (woodcroft)	lactose degradation	Galactose metabolism	2	MK
2022NBT-5023_125	RGVC3011	K01520	dUTP pyrophosphatase [EC:3.6.1.23] [RN:R02100]	MISC	Information systems	Nucleotide	Pyrimidine deoxyribonuleotide biosynthesis, CDP/CTP => dCDP/dCTP,dTDP/dTTP	2	M
2022NBT-52125_61	RGVC3104	K02040	pstS; phosphate transport system substrate-binding protein	Transporters			Phosphate transport system	2	MKE
2022NBT-539_1_19	RGVC3200	K00558	DNA (cytosine-5-)-methyltransferase [EC:2.1.1.37] [RN:R04858]	Organic Nitrogen	Amino Acid		Methionine degradation	2	M
2022NBT-57427_17	RGVC3409	K00558	DNA (cytosine-5-)-methyltransferase [EC:2.1.1.37] [RN:R04858]	Organic Nitrogen	Amino Acid		Methionine degradation	2	M
2022NBT-57427_19	RGVC3409	K00558	DNA (cytosine-5-)-methyltransferase [EC:2.1.1.37] [RN:R04858]	Organic Nitrogen	Amino Acid		Methionine degradation	2	M
2022NBT-57427_3	RGVC3409							2	MF
2022NBT-5841_13	RGVC3483							2	MK
2022NBT-5841_189	RGVC3483							1	MK
2022NBT-5841_306	RGVC3483							1	MK
2022NBT-5841_320	RGVC3483							1	MK
2022NBT-5841_342	RGVC3483	K00560	thymidylate synthase [EC:2.1.1.45] [RN:R02101]	MISC	Information systems	Nucleotide	Pyrimidine deoxyribonuleotide biosynthesis, CDP/CTP => dCDP/dCTP,dTDP/dTTP	1	M
2022NBT-5841_36	RGVC3483	K00560	thymidylate synthase [EC:2.1.1.45] [RN:R02101]	MISC	Information systems	Nucleotide	Pyrimidine deoxyribonuleotide biosynthesis, CDP/CTP => dCDP/dCTP,dTDP/dTTP	1	M
2022NBT-5841_371	RGVC3483	K01520	dUTP pyrophosphatase [EC:3.6.1.23] [RN:R02100]	MISC	Information systems	Nucleotide	Pyrimidine deoxyribonuleotide biosynthesis, CDP/CTP => dCDP/dCTP,dTDP/dTTP	1	M
2022NBT-5841_397	RGVC3483							1	MK
2022NBT-5841_66	RGVC3483	K01520	dUTP pyrophosphatase [EC:3.6.1.23] [RN:R02100]	MISC	Information systems	Nucleotide	Pyrimidine deoxyribonuleotide biosynthesis, CDP/CTP => dCDP/dCTP,dTDP/dTTP	1	M
2022NBT-5857_1_101	RGVC3494							2	MK
2022NBT-5857_1_54	RGVC3494							2	MK
2022NBT-5857_1_63	RGVC3494							2	MK
2022NBT-60004_13	RGVC3579							1	M
2022NBT-62290_34	RGVC3713	K00558	DNA (cytosine-5-)-methyltransferase [EC:2.1.1.37] [RN:R04858]	Organic Nitrogen	Amino Acid		Methionine degradation	2	M
2022NBT-62372_5	RGVC3718							2	MF
2022NBT-63684_46	RGVC3818							2	MK
2022NBT-63764_15	RGVC3824							1	M
2022NBT-66557_47	RGVC4001	K01520	dUTP pyrophosphatase [EC:3.6.1.23] [RN:R02100]	MISC	Information systems	Nucleotide	Pyrimidine deoxyribonuleotide biosynthesis, CDP/CTP => dCDP/dCTP,dTDP/dTTP	2	M
2022NBT-67676_51	RGVC4075	K01520	dUTP pyrophosphatase [EC:3.6.1.23] [RN:R02100]	MISC	Information systems	Nucleotide	Pyrimidine deoxyribonuleotide biosynthesis, CDP/CTP => dCDP/dCTP,dTDP/dTTP	2	M
2022NBT-6951_34	RGVC4207	K01938	formate--tetrahydrofolate ligase [EC:6.3.4.3] [RN:R00943]	Energy	C1		Reductive acetyl-CoA pathway (Wood-Ljungdahl pathway)	2	M
2022NBT-7030_1_29	RGVC4254	K00558	DNA (cytosine-5-)-methyltransferase [EC:2.1.1.37] [RN:R04858]	Organic Nitrogen	Amino Acid		Methionine degradation	2	M
2022NBT-7063_63	RGVC4279							1	MK
2022NBT-711_379	RGVC4308							1	MK
2022NBT-711_380	RGVC4308							1	MK
2022NBT-711_386	RGVC4308							1	MK
2022NBT-723_1_16	RGVC4373	K01494	dCTP deaminase [EC:3.5.4.13] [RN:R02325]	MISC	Information systems	Nucleotide	Pyrimidine deoxyribonuleotide biosynthesis, CDP/CTP => dCDP/dCTP,dTDP/dTTP	1	M
2022NBT-723_1_34	RGVC4373	K21636	ribonucleoside-triphosphate reductase [EC:1.17.4.2 1.1.98.6] [RN:R02022 R11636]	MISC	Information systems	Nucleotide	Pyrimidine deoxyribonuleotide biosynthesis, CDP/CTP => dCDP/dCTP,dTDP/dTTP	1	M
2022NBT-73401_1_25	RGVC4433							1	MK
2022NBT-73401_1_28	RGVC4433							1	MK
2022NBT-8231_1_9	RGVC4813	K00525	ribonucleoside-diphosphate reductase [EC:1.17.4.1] [RN:R02024]	MISC	Information systems	Nucleotide	Pyrimidine deoxyribonuleotide biosynthesis, CDP/CTP => dCDP/dCTP,dTDP/dTTP	2	MKE
2022NBT-8535_125	RGVC4901							1	MK
2022NBT-8861_1_203	RGVC4992	K00789	S-adenosylmethionine synthetase [EC:2.5.1.6] [RN:R00177]	Organic Nitrogen	Amino Acid		Methionine degradation	2	M
2022NBT-8861_1_204	RGVC4992	K00789	S-adenosylmethionine synthetase [EC:2.5.1.6] [RN:R00177]	Organic Nitrogen	Amino Acid		Methionine degradation	2	M
2022NBT-8861_1_61	RGVC4992							1	MK
2022NBT-9244_1_27	RGVC5096	K01520	dUTP pyrophosphatase [EC:3.6.1.23] [RN:R02100]	MISC	Information systems	Nucleotide	Pyrimidine deoxyribonuleotide biosynthesis, CDP/CTP => dCDP/dCTP,dTDP/dTTP	1	M
contig_22452_265	RGVC6312							1	MKE
contig_22452_436	RGVC6312	K01520	dUTP pyrophosphatase [EC:3.6.1.23] [RN:R02100]	MISC	Information systems	Nucleotide	Pyrimidine deoxyribonuleotide biosynthesis, CDP/CTP => dCDP/dCTP,dTDP/dTTP	2	M
contig_22452_51	RGVC6312							1	MKE
contig_22452_97	RGVC6312	K00789	S-adenosylmethionine synthetase [EC:2.5.1.6] [RN:R00177]	Organic Nitrogen	Amino Acid		Methionine degradation	1	M
contig_22452_98	RGVC6312	K00789	S-adenosylmethionine synthetase [EC:2.5.1.6] [RN:R00177]	Organic Nitrogen	Amino Acid		Methionine degradation	1	M
contig_49234_290	RGVC6702	K21636	ribonucleoside-triphosphate reductase [EC:1.17.4.2 1.1.98.6] [RN:R02022 R11636]	MISC	Information systems	Nucleotide	Pyrimidine deoxyribonuleotide biosynthesis, CDP/CTP => dCDP/dCTP,dTDP/dTTP	1	MKE
contig_49427_673	RGVC6710							2	MKE
contig_49427_684	RGVC6710							2	M
contig_49427_99	RGVC6710							2	MK
contig_84810_61	RGVC7204							2	MKF
contig_84810_62	RGVC7204							2	MKF
Dairy_cattle_Cecum-1__c69461_18	RGVC7412	K00558	DNA (cytosine-5-)-methyltransferase [EC:2.1.1.37] [RN:R04858]	Organic Nitrogen	Amino Acid		Methionine degradation	2	M
Dairy_cattle_Cecum-2__c339_149	RGVC7443							2	MK
Dairy_cattle_Cecum-2__c339_92	RGVC7443							1	MK
Dairy_cattle_Cecum-6__c1179419_40	RGVC7606	K21636	ribonucleoside-triphosphate reductase [EC:1.17.4.2 1.1.98.6] [RN:R02022 R11636]	MISC	Information systems	Nucleotide	Pyrimidine deoxyribonuleotide biosynthesis, CDP/CTP => dCDP/dCTP,dTDP/dTTP	2	MKE
Dairy_cattle_Cecum-6__c1179419_42	RGVC7606	K21636	ribonucleoside-triphosphate reductase [EC:1.17.4.2 1.1.98.6] [RN:R02022 R11636]	MISC	Information systems	Nucleotide	Pyrimidine deoxyribonuleotide biosynthesis, CDP/CTP => dCDP/dCTP,dTDP/dTTP	2	M
Dairy_cattle_Cecum-6__c1179419_44	RGVC7606	K01520	dUTP pyrophosphatase [EC:3.6.1.23] [RN:R02100]	MISC	Information systems	Nucleotide	Pyrimidine deoxyribonuleotide biosynthesis, CDP/CTP => dCDP/dCTP,dTDP/dTTP	2	M
Dairy_cattle_Cecum-6__c622_241	RGVC7622							1	MK
Dairy_cattle_Cecum-6__c622_244	RGVC7622							1	MK
Dairy_cattle_Cecum-6__c622_247	RGVC7622							1	MK
Dairy_cattle_Cecum-6__c622_262	RGVC7622	K02406	flagellin	MISC	Flagella Structure		Flagellar Assembly	1	M
Dairy_cattle_Cecum-6__c622_312	RGVC7622	K01520	dUTP pyrophosphatase [EC:3.6.1.23] [RN:R02100]	MISC	Information systems	Nucleotide	Pyrimidine deoxyribonuleotide biosynthesis, CDP/CTP => dCDP/dCTP,dTDP/dTTP	2	M
Dairy_cattle_Cecum-6__c622_39	RGVC7622	K21636	ribonucleoside-triphosphate reductase [EC:1.17.4.2 1.1.98.6] [RN:R02022 R11636]	MISC	Information systems	Nucleotide	Pyrimidine deoxyribonuleotide biosynthesis, CDP/CTP => dCDP/dCTP,dTDP/dTTP	1	MKE
Dairy_cattle_Colon-2__c590289_71	RGVC7677	K01520	dUTP pyrophosphatase [EC:3.6.1.23] [RN:R02100]	MISC	Information systems	Nucleotide	Pyrimidine deoxyribonuleotide biosynthesis, CDP/CTP => dCDP/dCTP,dTDP/dTTP	1	MF
Dairy_cattle_Colon-3__c464966_37	RGVC7719	K01520	dUTP pyrophosphatase [EC:3.6.1.23] [RN:R02100]	MISC	Information systems	Nucleotide	Pyrimidine deoxyribonuleotide biosynthesis, CDP/CTP => dCDP/dCTP,dTDP/dTTP	1	M
Dairy_cattle_Colon-3__c50789_24	RGVC7722	K21636	ribonucleoside-triphosphate reductase [EC:1.17.4.2 1.1.98.6] [RN:R02022 R11636]	MISC	Information systems	Nucleotide	Pyrimidine deoxyribonuleotide biosynthesis, CDP/CTP => dCDP/dCTP,dTDP/dTTP	2	M
Dairy_cattle_Colon-3__c50789_27	RGVC7722	K01520	dUTP pyrophosphatase [EC:3.6.1.23] [RN:R02100]	MISC	Information systems	Nucleotide	Pyrimidine deoxyribonuleotide biosynthesis, CDP/CTP => dCDP/dCTP,dTDP/dTTP	2	M
Dairy_cattle_Colon-4__c197293_28	RGVC7756	K00558	DNA (cytosine-5-)-methyltransferase [EC:2.1.1.37] [RN:R04858]	Organic Nitrogen	Amino Acid		Methionine degradation	1	M
Dairy_cattle_Colon-5__c687864_31	RGVC7875	K01520	dUTP pyrophosphatase [EC:3.6.1.23] [RN:R02100]	MISC	Information systems	Nucleotide	Pyrimidine deoxyribonuleotide biosynthesis, CDP/CTP => dCDP/dCTP,dTDP/dTTP	2	MF
Dairy_cattle_Colon-6__c180_40	RGVC7906							2	MK
Dairy_cattle_Duodenum-3__c1203_16	RGVC8434	K01520	dUTP pyrophosphatase [EC:3.6.1.23] [RN:R02100]	MISC	Information systems	Nucleotide	Pyrimidine deoxyribonuleotide biosynthesis, CDP/CTP => dCDP/dCTP,dTDP/dTTP	1	M
Dairy_cattle_Duodenum-3__c831492_7	RGVC9391	K01520	dUTP pyrophosphatase [EC:3.6.1.23] [RN:R02100]	MISC	Information systems	Nucleotide	Pyrimidine deoxyribonuleotide biosynthesis, CDP/CTP => dCDP/dCTP,dTDP/dTTP	1	M
Dairy_cattle_Jejunum-1__c552740_174	RGVC9933							1	MK
Dairy_cattle_Jejunum-1__c552740_178	RGVC9933							1	MK
Dairy_cattle_Jejunum-1__c552740_180	RGVC9933							1	MK
Dairy_cattle_Jejunum-1__c552740_183	RGVC9933							1	MK
Dairy_cattle_Jejunum-1__c552740_229	RGVC9933	K21636	ribonucleoside-triphosphate reductase [EC:1.17.4.2 1.1.98.6] [RN:R02022 R11636]	MISC	Information systems	Nucleotide	Pyrimidine deoxyribonuleotide biosynthesis, CDP/CTP => dCDP/dCTP,dTDP/dTTP	1	M
Dairy_cattle_Jejunum-1__c552740_239	RGVC9933	K01520	dUTP pyrophosphatase [EC:3.6.1.23] [RN:R02100]	MISC	Information systems	Nucleotide	Pyrimidine deoxyribonuleotide biosynthesis, CDP/CTP => dCDP/dCTP,dTDP/dTTP	1	M
Dairy_cattle_Jejunum-1__c552740_245	RGVC9933	K02970	small subunit ribosomal protein S21	MISC	Information systems		Ribosome, bacteria	1	M
Dairy_cattle_Jejunum-1__c552740_251	RGVC9933							1	MK
Dairy_cattle_Jejunum-1__c552740_253	RGVC9933							1	MK
Dairy_cattle_Jejunum-1__c552740_263	RGVC9933							1	MK
Dairy_cattle_Jejunum-2__c1089_6	RGVC10066	K01520	dUTP pyrophosphatase [EC:3.6.1.23] [RN:R02100]	MISC	Information systems	Nucleotide	Pyrimidine deoxyribonuleotide biosynthesis, CDP/CTP => dCDP/dCTP,dTDP/dTTP	2	MF
Dairy_cattle_Jejunum-2__c416642_37	RGVC10346	K01520	dUTP pyrophosphatase [EC:3.6.1.23] [RN:R02100]	MISC	Information systems	Nucleotide	Pyrimidine deoxyribonuleotide biosynthesis, CDP/CTP => dCDP/dCTP,dTDP/dTTP	1	M
Dairy_cattle_Rectum-1__c124994_165	RGVC10763							1	MK
Dairy_cattle_Rectum-1__c124994_30	RGVC10763	K01520	dUTP pyrophosphatase [EC:3.6.1.23] [RN:R02100]	MISC	Information systems	Nucleotide	Pyrimidine deoxyribonuleotide biosynthesis, CDP/CTP => dCDP/dCTP,dTDP/dTTP	1	M
Dairy_cattle_Rectum-1__c124994_34	RGVC10763	K21636	ribonucleoside-triphosphate reductase [EC:1.17.4.2 1.1.98.6] [RN:R02022 R11636]	MISC	Information systems	Nucleotide	Pyrimidine deoxyribonuleotide biosynthesis, CDP/CTP => dCDP/dCTP,dTDP/dTTP	1	MKE
Dairy_cattle_Rectum-1__c124994_35	RGVC10763							1	MK
Dairy_cattle_Rectum-1__c292597_35	RGVC10771	K00558	DNA (cytosine-5-)-methyltransferase [EC:2.1.1.37] [RN:R04858]	Organic Nitrogen	Amino Acid		Methionine degradation	1	M
Dairy_cattle_Rectum-5__c107565_23	RGVC10926							1	MK
Dairy_cattle_Rumen-3__c664_68	RGVC11170	K01520	dUTP pyrophosphatase [EC:3.6.1.23] [RN:R02100]	MISC	Information systems	Nucleotide	Pyrimidine deoxyribonuleotide biosynthesis, CDP/CTP => dCDP/dCTP,dTDP/dTTP	2	M
flye-dairy_11394_22	RGVC11283							2	MK
flye-dairy_11394_83	RGVC11283	K01520	dUTP pyrophosphatase [EC:3.6.1.23] [RN:R02100]	MISC	Information systems	Nucleotide	Pyrimidine deoxyribonuleotide biosynthesis, CDP/CTP => dCDP/dCTP,dTDP/dTTP	2	M
flye-dairy_11394_96	RGVC11283	K21636	ribonucleoside-triphosphate reductase [EC:1.17.4.2 1.1.98.6] [RN:R02022 R11636]	MISC	Information systems	Nucleotide	Pyrimidine deoxyribonuleotide biosynthesis, CDP/CTP => dCDP/dCTP,dTDP/dTTP	2	M
flye-dairy_11394_98	RGVC11283							2	MK
flye-dairy_15170_26	RGVC11402							1	M
flye-dairy_15182_23	RGVC11403							2	MK
flye-dairy_15182_245	RGVC11403							1	MK
flye-dairy_15182_251	RGVC11403							1	MK
flye-dairy_15182_286	RGVC11403	K01520	dUTP pyrophosphatase [EC:3.6.1.23] [RN:R02100]	MISC	Information systems	Nucleotide	Pyrimidine deoxyribonuleotide biosynthesis, CDP/CTP => dCDP/dCTP,dTDP/dTTP	1	M
flye-dairy_15182_29	RGVC11403	M54	Catlytic type: Metallo; eukaryote archelysin has a preference for arginine in P1; the AMZ1 protein cleaves alanyl bonds	Organic Nitrogen	Peptidase		Aminopeptidases, sometimes termed archaelysins or archaemetzincins	2	M
flye-dairy_15182_294	RGVC11403	K21636	ribonucleoside-triphosphate reductase [EC:1.17.4.2 1.1.98.6] [RN:R02022 R11636]	MISC	Information systems	Nucleotide	Pyrimidine deoxyribonuleotide biosynthesis, CDP/CTP => dCDP/dCTP,dTDP/dTTP	1	MKE
flye-dairy_15182_338	RGVC11403							1	MK
flye-dairy_17441_215	RGVC11466	K01520	dUTP pyrophosphatase [EC:3.6.1.23] [RN:R02100]	MISC	Information systems	Nucleotide	Pyrimidine deoxyribonuleotide biosynthesis, CDP/CTP => dCDP/dCTP,dTDP/dTTP	1	M
flye-dairy_17441_260	RGVC11466	K21636	ribonucleoside-triphosphate reductase [EC:1.17.4.2 1.1.98.6] [RN:R02022 R11636]	MISC	Information systems	Nucleotide	Pyrimidine deoxyribonuleotide biosynthesis, CDP/CTP => dCDP/dCTP,dTDP/dTTP	1	MKE
flye-dairy_17441_269	RGVC11466							1	M
flye-dairy_17441_418	RGVC11466							1	MK
flye-dairy_17441_434	RGVC11466							1	MK
flye-dairy_17441_435	RGVC11466							1	M
flye-dairy_18845_11	RGVC11509	K00789	S-adenosylmethionine synthetase [EC:2.5.1.6] [RN:R00177]	Organic Nitrogen	Amino Acid		Methionine degradation	2	M
flye-dairy_18903_23	RGVC11514	K01939	adenylosuccinate synthase [EC:6.3.4.4] [RN:R01135]	MISC	Information systems	Nucleotide	Adenine ribonucleotide biosynthesis, IMP => ADP,ATP	2	M
flye-dairy_18903_74	RGVC11514	K21636	ribonucleoside-triphosphate reductase [EC:1.17.4.2 1.1.98.6] [RN:R02022 R11636]	MISC	Information systems	Nucleotide	Pyrimidine deoxyribonuleotide biosynthesis, CDP/CTP => dCDP/dCTP,dTDP/dTTP	2	MKE
flye-dairy_18903_81	RGVC11514	K01520	dUTP pyrophosphatase [EC:3.6.1.23] [RN:R02100]	MISC	Information systems	Nucleotide	Pyrimidine deoxyribonuleotide biosynthesis, CDP/CTP => dCDP/dCTP,dTDP/dTTP	2	M
flye-dairy_19148_132	RGVC11522							2	MK
flye-dairy_19148_144	RGVC11522	K01520	dUTP pyrophosphatase [EC:3.6.1.23] [RN:R02100]	MISC	Information systems	Nucleotide	Pyrimidine deoxyribonuleotide biosynthesis, CDP/CTP => dCDP/dCTP,dTDP/dTTP	2	M
flye-dairy_19148_205	RGVC11522	K01939	adenylosuccinate synthase [EC:6.3.4.4] [RN:R01135]	MISC	Information systems	Nucleotide	Adenine ribonucleotide biosynthesis, IMP => ADP,ATP	2	M
flye-dairy_19148_73	RGVC11522							2	MK
flye-dairy_20300_24	RGVC11560	K00558	DNA (cytosine-5-)-methyltransferase [EC:2.1.1.37] [RN:R04858]	Organic Nitrogen	Amino Acid		Methionine degradation	1	M
flye-dairy_20300_48	RGVC11560	K01520	dUTP pyrophosphatase [EC:3.6.1.23] [RN:R02100]	MISC	Information systems	Nucleotide	Pyrimidine deoxyribonuleotide biosynthesis, CDP/CTP => dCDP/dCTP,dTDP/dTTP	1	M
flye-dairy_22496_13	RGVC11633	K00789	S-adenosylmethionine synthetase [EC:2.5.1.6] [RN:R00177]	Organic Nitrogen	Amino Acid		Methionine degradation	2	M
flye-dairy_22496_19	RGVC11633	K00558	DNA (cytosine-5-)-methyltransferase [EC:2.1.1.37] [RN:R04858]	Organic Nitrogen	Amino Acid		Methionine degradation	2	M
flye-dairy_22496_7	RGVC11633	K00789	S-adenosylmethionine synthetase [EC:2.5.1.6] [RN:R00177]	Organic Nitrogen	Amino Acid		Methionine degradation	2	MF
flye-dairy_24693_110	RGVC11704							2	MK
flye-dairy_24693_149	RGVC11704							2	MK
flye-dairy_24693_86	RGVC11704	K01520	dUTP pyrophosphatase [EC:3.6.1.23] [RN:R02100]	MISC	Information systems	Nucleotide	Pyrimidine deoxyribonuleotide biosynthesis, CDP/CTP => dCDP/dCTP,dTDP/dTTP	2	M
flye-dairy_24693_88	RGVC11704	K21636	ribonucleoside-triphosphate reductase [EC:1.17.4.2 1.1.98.6] [RN:R02022 R11636]	MISC	Information systems	Nucleotide	Pyrimidine deoxyribonuleotide biosynthesis, CDP/CTP => dCDP/dCTP,dTDP/dTTP	2	M
flye-dairy_24693_90	RGVC11704							2	MK
flye-dairy_25779_46	RGVC11760							2	MK
flye-dairy_25779_72	RGVC11760	K00558	DNA (cytosine-5-)-methyltransferase [EC:2.1.1.37] [RN:R04858]	Organic Nitrogen	Amino Acid		Methionine degradation	2	M
flye-dairy_25927_102	RGVC11773	K01520	dUTP pyrophosphatase [EC:3.6.1.23] [RN:R02100]	MISC	Information systems	Nucleotide	Pyrimidine deoxyribonuleotide biosynthesis, CDP/CTP => dCDP/dCTP,dTDP/dTTP	1	M
flye-dairy_25927_108	RGVC11773							1	MK
flye-dairy_25927_60	RGVC11773							1	MK
flye-dairy_25927_99	RGVC11773	K21636	ribonucleoside-triphosphate reductase [EC:1.17.4.2 1.1.98.6] [RN:R02022 R11636]	MISC	Information systems	Nucleotide	Pyrimidine deoxyribonuleotide biosynthesis, CDP/CTP => dCDP/dCTP,dTDP/dTTP	1	M
flye-dairy_25935_38	RGVC11775	K00558	DNA (cytosine-5-)-methyltransferase [EC:2.1.1.37] [RN:R04858]	Organic Nitrogen	Amino Acid		Methionine degradation	2	M
flye-dairy_27186_36	RGVC11828							1	M
flye-dairy_27186_70	RGVC11828	K00789	S-adenosylmethionine synthetase [EC:2.5.1.6] [RN:R00177]	Organic Nitrogen	Amino Acid		Methionine degradation	2	M
flye-dairy_27649_116	RGVC11845							1	M
flye-dairy_27649_140	RGVC11845	K21636	ribonucleoside-triphosphate reductase [EC:1.17.4.2 1.1.98.6] [RN:R02022 R11636]	MISC	Information systems	Nucleotide	Pyrimidine deoxyribonuleotide biosynthesis, CDP/CTP => dCDP/dCTP,dTDP/dTTP	1	MKE
flye-dairy_27649_152	RGVC11845							1	MK
flye-dairy_27649_169	RGVC11845	K01520	dUTP pyrophosphatase [EC:3.6.1.23] [RN:R02100]	MISC	Information systems	Nucleotide	Pyrimidine deoxyribonuleotide biosynthesis, CDP/CTP => dCDP/dCTP,dTDP/dTTP	1	M
flye-dairy_29754_46	RGVC11917	K01520	dUTP pyrophosphatase [EC:3.6.1.23] [RN:R02100]	MISC	Information systems	Nucleotide	Pyrimidine deoxyribonuleotide biosynthesis, CDP/CTP => dCDP/dCTP,dTDP/dTTP	2	M
flye-dairy_30171_73	RGVC11939	K00789	S-adenosylmethionine synthetase [EC:2.5.1.6] [RN:R00177]	Organic Nitrogen	Amino Acid		Methionine degradation	2	M
flye-dairy_33378_120	RGVC12081							1	M
flye-dairy_33378_299	RGVC12081							1	MK
flye-dairy_33378_300	RGVC12081							1	MK
flye-dairy_33378_312	RGVC12081							1	M
flye-dairy_33378_378	RGVC12081							2	M
flye-dairy_33378_41	RGVC12081							2	MK
flye-dairy_33378_77	RGVC12081	K21636	ribonucleoside-triphosphate reductase [EC:1.17.4.2 1.1.98.6] [RN:R02022 R11636]	MISC	Information systems	Nucleotide	Pyrimidine deoxyribonuleotide biosynthesis, CDP/CTP => dCDP/dCTP,dTDP/dTTP	1	MKE
flye-dairy_35961_231	RGVC12186							2	MK
flye-dairy_36182_1_64	RGVC12198	K00789	S-adenosylmethionine synthetase [EC:2.5.1.6] [RN:R00177]	Organic Nitrogen	Amino Acid		Methionine degradation	1	M
flye-dairy_36182_1_65	RGVC12198	K00789	S-adenosylmethionine synthetase [EC:2.5.1.6] [RN:R00177]	Organic Nitrogen	Amino Acid		Methionine degradation	1	M
flye-dairy_36321_156	RGVC12203							1	MK
flye-dairy_36321_315	RGVC12203							1	MK
flye-dairy_36321_320	RGVC12203	K21636	ribonucleoside-triphosphate reductase [EC:1.17.4.2 1.1.98.6] [RN:R02022 R11636]	MISC	Information systems	Nucleotide	Pyrimidine deoxyribonuleotide biosynthesis, CDP/CTP => dCDP/dCTP,dTDP/dTTP	1	M
flye-dairy_36321_339	RGVC12203	K01520	dUTP pyrophosphatase [EC:3.6.1.23] [RN:R02100]	MISC	Information systems	Nucleotide	Pyrimidine deoxyribonuleotide biosynthesis, CDP/CTP => dCDP/dCTP,dTDP/dTTP	1	M
flye-dairy_36321_341	RGVC12203							1	MK
flye-dairy_36321_349	RGVC12203							1	MK
flye-dairy_36321_358	RGVC12203							1	MK
flye-dairy_36321_359	RGVC12203							1	MK
flye-dairy_36321_361	RGVC12203							1	MK
flye-dairy_36321_439	RGVC12203							2	MK
flye-dairy_36436_30	RGVC12209							2	MK
flye-dairy_36437_5	RGVC12210	K00558	DNA (cytosine-5-)-methyltransferase [EC:2.1.1.37] [RN:R04858]	Organic Nitrogen	Amino Acid		Methionine degradation	2	MF
flye-dairy_36437_6	RGVC12210	K00558	DNA (cytosine-5-)-methyltransferase [EC:2.1.1.37] [RN:R04858]	Organic Nitrogen	Amino Acid		Methionine degradation	2	MF
flye-dairy_36864_16	RGVC12225							2	MK
flye-dairy_36864_413	RGVC12225	K01520	dUTP pyrophosphatase [EC:3.6.1.23] [RN:R02100]	MISC	Information systems	Nucleotide	Pyrimidine deoxyribonuleotide biosynthesis, CDP/CTP => dCDP/dCTP,dTDP/dTTP	1	M
flye-dairy_38621_31	RGVC12314	K00789	S-adenosylmethionine synthetase [EC:2.5.1.6] [RN:R00177]	Organic Nitrogen	Amino Acid		Methionine degradation	2	M
flye-dairy_41243_47	RGVC12436	K01520	dUTP pyrophosphatase [EC:3.6.1.23] [RN:R02100]	MISC	Information systems	Nucleotide	Pyrimidine deoxyribonuleotide biosynthesis, CDP/CTP => dCDP/dCTP,dTDP/dTTP	2	M
flye-dairy_41243_55	RGVC12436	K21636	ribonucleoside-triphosphate reductase [EC:1.17.4.2 1.1.98.6] [RN:R02022 R11636]	MISC	Information systems	Nucleotide	Pyrimidine deoxyribonuleotide biosynthesis, CDP/CTP => dCDP/dCTP,dTDP/dTTP	2	MKE
flye-dairy_41784_1_16	RGVC12476							1	MK
flye-dairy_44160_20	RGVC12599	K00789	S-adenosylmethionine synthetase [EC:2.5.1.6] [RN:R00177]	Organic Nitrogen	Amino Acid		Methionine degradation	2	M
flye-dairy_44482_22	RGVC12615	K01520	dUTP pyrophosphatase [EC:3.6.1.23] [RN:R02100]	MISC	Information systems	Nucleotide	Pyrimidine deoxyribonuleotide biosynthesis, CDP/CTP => dCDP/dCTP,dTDP/dTTP	1	M
flye-dairy_44482_41	RGVC12615	K00558	DNA (cytosine-5-)-methyltransferase [EC:2.1.1.37] [RN:R04858]	Organic Nitrogen	Amino Acid		Methionine degradation	1	M
flye-dairy_4513_130	RGVC12663	K21636	ribonucleoside-triphosphate reductase [EC:1.17.4.2 1.1.98.6] [RN:R02022 R11636]	MISC	Information systems	Nucleotide	Pyrimidine deoxyribonuleotide biosynthesis, CDP/CTP => dCDP/dCTP,dTDP/dTTP	3	MKE
flye-dairy_4513_132	RGVC12663	K21636	ribonucleoside-triphosphate reductase [EC:1.17.4.2 1.1.98.6] [RN:R02022 R11636]	MISC	Information systems	Nucleotide	Pyrimidine deoxyribonuleotide biosynthesis, CDP/CTP => dCDP/dCTP,dTDP/dTTP	3	M
flye-dairy_4513_164	RGVC12663	K01520	dUTP pyrophosphatase [EC:3.6.1.23] [RN:R02100]	MISC	Information systems	Nucleotide	Pyrimidine deoxyribonuleotide biosynthesis, CDP/CTP => dCDP/dCTP,dTDP/dTTP	3	M
flye-dairy_4513_32	RGVC12663							3	MK
flye-dairy_45423_85	RGVC12681	K01520	dUTP pyrophosphatase [EC:3.6.1.23] [RN:R02100]	MISC	Information systems	Nucleotide	Pyrimidine deoxyribonuleotide biosynthesis, CDP/CTP => dCDP/dCTP,dTDP/dTTP	2	M
flye-dairy_45499_131	RGVC12693							2	MK
flye-dairy_45499_133	RGVC12693							2	MK
flye-dairy_45697_8	RGVC12713	K00789	S-adenosylmethionine synthetase [EC:2.5.1.6] [RN:R00177]	Organic Nitrogen	Amino Acid		Methionine degradation	2	MF
flye-dairy_46825_39	RGVC12773	K01520	dUTP pyrophosphatase [EC:3.6.1.23] [RN:R02100]	MISC	Information systems	Nucleotide	Pyrimidine deoxyribonuleotide biosynthesis, CDP/CTP => dCDP/dCTP,dTDP/dTTP	1	M
flye-dairy_48418_22	RGVC12861							2	MK
flye-dairy_48418_58	RGVC12861	I39	interact with endopeptidases regardless of catalytic type	Organic Nitrogen	Peptidase		Mammalian alpha-macroglobulin and other large homologous proteins that interact with endopeptidases regardless of catalytic type	2	M
flye-dairy_48897_32	RGVC12889	K00789	S-adenosylmethionine synthetase [EC:2.5.1.6] [RN:R00177]	Organic Nitrogen	Amino Acid		Methionine degradation	2	M
flye-dairy_49720_16	RGVC12935	K00789	S-adenosylmethionine synthetase [EC:2.5.1.6] [RN:R00177]	Organic Nitrogen	Amino Acid		Methionine degradation	1	M
flye-dairy_49996_193	RGVC12957							1	MK
flye-dairy_49996_268	RGVC12957							1	MK
flye-dairy_49996_51	RGVC12957	K21636	ribonucleoside-triphosphate reductase [EC:1.17.4.2 1.1.98.6] [RN:R02022 R11636]	MISC	Information systems	Nucleotide	Pyrimidine deoxyribonuleotide biosynthesis, CDP/CTP => dCDP/dCTP,dTDP/dTTP	2	M
flye-dairy_49996_63	RGVC12957	K01520	dUTP pyrophosphatase [EC:3.6.1.23] [RN:R02100]	MISC	Information systems	Nucleotide	Pyrimidine deoxyribonuleotide biosynthesis, CDP/CTP => dCDP/dCTP,dTDP/dTTP	2	M
flye-dairy_50036_70	RGVC12962	K00558	DNA (cytosine-5-)-methyltransferase [EC:2.1.1.37] [RN:R04858]	Organic Nitrogen	Amino Acid		Methionine degradation	2	M
flye-dairy_50209_84	RGVC12971	K01520	dUTP pyrophosphatase [EC:3.6.1.23] [RN:R02100]	MISC	Information systems	Nucleotide	Pyrimidine deoxyribonuleotide biosynthesis, CDP/CTP => dCDP/dCTP,dTDP/dTTP	1	M
flye-dairy_51354_206	RGVC13048	K01520	dUTP pyrophosphatase [EC:3.6.1.23] [RN:R02100]	MISC	Information systems	Nucleotide	Pyrimidine deoxyribonuleotide biosynthesis, CDP/CTP => dCDP/dCTP,dTDP/dTTP	2	M
flye-dairy_51354_212	RGVC13048	K21636	ribonucleoside-triphosphate reductase [EC:1.17.4.2 1.1.98.6] [RN:R02022 R11636]	MISC	Information systems	Nucleotide	Pyrimidine deoxyribonuleotide biosynthesis, CDP/CTP => dCDP/dCTP,dTDP/dTTP	2	MKE
flye-dairy_51354_256	RGVC13048	K01939	adenylosuccinate synthase [EC:6.3.4.4] [RN:R01135]	MISC	Information systems	Nucleotide	Adenine ribonucleotide biosynthesis, IMP => ADP,ATP	2	M
flye-dairy_51354_271	RGVC13048							2	MK
flye-dairy_52407_17	RGVC13119	K00789	S-adenosylmethionine synthetase [EC:2.5.1.6] [RN:R00177]	Organic Nitrogen	Amino Acid		Methionine degradation	1	M
flye-dairy_53997_176	RGVC13222							1	MK
flye-dairy_53997_306	RGVC13222	K21636	ribonucleoside-triphosphate reductase [EC:1.17.4.2 1.1.98.6] [RN:R02022 R11636]	MISC	Information systems	Nucleotide	Pyrimidine deoxyribonuleotide biosynthesis, CDP/CTP => dCDP/dCTP,dTDP/dTTP	1	M
flye-dairy_53997_320	RGVC13222	K01520	dUTP pyrophosphatase [EC:3.6.1.23] [RN:R02100]	MISC	Information systems	Nucleotide	Pyrimidine deoxyribonuleotide biosynthesis, CDP/CTP => dCDP/dCTP,dTDP/dTTP	1	M
flye-dairy_53997_374	RGVC13222							2	MK
flye-dairy_53997_77	RGVC13222							2	MK
flye-dairy_55399_139	RGVC13351	K00789	S-adenosylmethionine synthetase [EC:2.5.1.6] [RN:R00177]	Organic Nitrogen	Amino Acid		Methionine degradation	1	M
flye-dairy_55399_179	RGVC13351							1	M
flye-dairy_55399_195	RGVC13351							1	MKE
flye-dairy_55399_231	RGVC13351							1	MK
flye-dairy_55399_270	RGVC13351	K01520	dUTP pyrophosphatase [EC:3.6.1.23] [RN:R02100]	MISC	Information systems	Nucleotide	Pyrimidine deoxyribonuleotide biosynthesis, CDP/CTP => dCDP/dCTP,dTDP/dTTP	1	M
flye-dairy_55399_281	RGVC13351	K00558	DNA (cytosine-5-)-methyltransferase [EC:2.1.1.37] [RN:R04858]	Organic Nitrogen	Amino Acid		Methionine degradation	1	M
flye-dairy_55399_286	RGVC13351	K00558	DNA (cytosine-5-)-methyltransferase [EC:2.1.1.37] [RN:R04858]	Organic Nitrogen	Amino Acid		Methionine degradation	1	M
flye-dairy_55399_29	RGVC13351							1	MK
flye-dairy_55399_3	RGVC13351							2	MKF
flye-dairy_55399_44	RGVC13351							1	MK
flye-dairy_55399_76	RGVC13351							1	MKE
flye-dairy_56739_135	RGVC13475	K21636	ribonucleoside-triphosphate reductase [EC:1.17.4.2 1.1.98.6] [RN:R02022 R11636]	MISC	Information systems	Nucleotide	Pyrimidine deoxyribonuleotide biosynthesis, CDP/CTP => dCDP/dCTP,dTDP/dTTP	2	M
flye-dairy_56739_142	RGVC13475	K01520	dUTP pyrophosphatase [EC:3.6.1.23] [RN:R02100]	MISC	Information systems	Nucleotide	Pyrimidine deoxyribonuleotide biosynthesis, CDP/CTP => dCDP/dCTP,dTDP/dTTP	2	M
flye-dairy_56739_74	RGVC13475							2	MK
flye-dairy_56872_135	RGVC13482							1	MK
flye-dairy_56872_139	RGVC13482	K01885	EARS; glutamyl-tRNA synthetase [EC:6.1.1.17]	MISC	Information systems		Aminoacyl-tRNA biosynthesis, eukaryotes	1	MK
flye-dairy_56872_185	RGVC13482							1	MK
flye-dairy_56872_302	RGVC13482							1	MK
flye-dairy_56872_34	RGVC13482							1	MK
flye-dairy_56872_373	RGVC13482	K01520	dUTP pyrophosphatase [EC:3.6.1.23] [RN:R02100]	MISC	Information systems	Nucleotide	Pyrimidine deoxyribonuleotide biosynthesis, CDP/CTP => dCDP/dCTP,dTDP/dTTP	1	M
flye-dairy_56872_388	RGVC13482	K21636	ribonucleoside-triphosphate reductase [EC:1.17.4.2 1.1.98.6] [RN:R02022 R11636]	MISC	Information systems	Nucleotide	Pyrimidine deoxyribonuleotide biosynthesis, CDP/CTP => dCDP/dCTP,dTDP/dTTP	2	MKE
flye-dairy_56931_27	RGVC13486							2	MK
flye-dairy_57704_128	RGVC13545	K21636	ribonucleoside-triphosphate reductase [EC:1.17.4.2 1.1.98.6] [RN:R02022 R11636]	MISC	Information systems	Nucleotide	Pyrimidine deoxyribonuleotide biosynthesis, CDP/CTP => dCDP/dCTP,dTDP/dTTP	3	MKE
flye-dairy_57899_47	RGVC13567							2	MK
flye-dairy_57899_59	RGVC13567	K21636	ribonucleoside-triphosphate reductase [EC:1.17.4.2 1.1.98.6] [RN:R02022 R11636]	MISC	Information systems	Nucleotide	Pyrimidine deoxyribonuleotide biosynthesis, CDP/CTP => dCDP/dCTP,dTDP/dTTP	2	M
flye-dairy_57899_60	RGVC13567	K21636	ribonucleoside-triphosphate reductase [EC:1.17.4.2 1.1.98.6] [RN:R02022 R11636]	MISC	Information systems	Nucleotide	Pyrimidine deoxyribonuleotide biosynthesis, CDP/CTP => dCDP/dCTP,dTDP/dTTP	2	MKE
flye-dairy_57899_70	RGVC13567	K00558	DNA (cytosine-5-)-methyltransferase [EC:2.1.1.37] [RN:R04858]	Organic Nitrogen	Amino Acid		Methionine degradation	2	M
flye-dairy_57899_8	RGVC13567	K01520	dUTP pyrophosphatase [EC:3.6.1.23] [RN:R02100]	MISC	Information systems	Nucleotide	Pyrimidine deoxyribonuleotide biosynthesis, CDP/CTP => dCDP/dCTP,dTDP/dTTP	2	M
flye-dairy_58049_55	RGVC13583	K00789	S-adenosylmethionine synthetase [EC:2.5.1.6] [RN:R00177]	Organic Nitrogen	Amino Acid		Methionine degradation	1	MF
flye-dairy_58843_75	RGVC13656	K00558	DNA (cytosine-5-)-methyltransferase [EC:2.1.1.37] [RN:R04858]	Organic Nitrogen	Amino Acid		Methionine degradation	2	M
flye-dairy_58941_75	RGVC13663							1	MK
flye-dairy_58941_78	RGVC13663							1	M
flye-dairy_58941_79	RGVC13663							1	MK
flye-dairy_58941_81	RGVC13663	K01520	dUTP pyrophosphatase [EC:3.6.1.23] [RN:R02100]	MISC	Information systems	Nucleotide	Pyrimidine deoxyribonuleotide biosynthesis, CDP/CTP => dCDP/dCTP,dTDP/dTTP	1	M
flye-dairy_58941_90	RGVC13663	K21636	ribonucleoside-triphosphate reductase [EC:1.17.4.2 1.1.98.6] [RN:R02022 R11636]	MISC	Information systems	Nucleotide	Pyrimidine deoxyribonuleotide biosynthesis, CDP/CTP => dCDP/dCTP,dTDP/dTTP	1	MKE
flye-dairy_58941_91	RGVC13663							1	MK
flye-dairy_59090_21	RGVC13676	K00789	S-adenosylmethionine synthetase [EC:2.5.1.6] [RN:R00177]	Organic Nitrogen	Amino Acid		Methionine degradation	2	M
flye-dairy_59273_76	RGVC13700	A28A	Catlytic type: Aspartic; No peptidase activity has been shown for any member of the family	Organic Nitrogen	Peptidase		No peptidase activity has been shown for any member of the family	2	M
flye-dairy_59273_77	RGVC13700	K01520	dUTP pyrophosphatase [EC:3.6.1.23] [RN:R02100]	MISC	Information systems	Nucleotide	Pyrimidine deoxyribonuleotide biosynthesis, CDP/CTP => dCDP/dCTP,dTDP/dTTP	2	M
flye-dairy_59812_162	RGVC13750							2	MK
flye-dairy_59812_87	RGVC13750	K01520	dUTP pyrophosphatase [EC:3.6.1.23] [RN:R02100]	MISC	Information systems	Nucleotide	Pyrimidine deoxyribonuleotide biosynthesis, CDP/CTP => dCDP/dCTP,dTDP/dTTP	2	M
flye-dairy_59812_92	RGVC13750	K21636	ribonucleoside-triphosphate reductase [EC:1.17.4.2 1.1.98.6] [RN:R02022 R11636]	MISC	Information systems	Nucleotide	Pyrimidine deoxyribonuleotide biosynthesis, CDP/CTP => dCDP/dCTP,dTDP/dTTP	2	M
flye-dairy_59812_96	RGVC13750							2	MK
flye-dairy_59848_70	RGVC13757	K00789	S-adenosylmethionine synthetase [EC:2.5.1.6] [RN:R00177]	Organic Nitrogen	Amino Acid		Methionine degradation	2	M
flye-dairy_60181_7	RGVC13802	K00789	S-adenosylmethionine synthetase [EC:2.5.1.6] [RN:R00177]	Organic Nitrogen	Amino Acid		Methionine degradation	2	MF
flye-dairy_61352_49	RGVC13920	K00558	DNA (cytosine-5-)-methyltransferase [EC:2.1.1.37] [RN:R04858]	Organic Nitrogen	Amino Acid		Methionine degradation	2	M
flye-dairy_61854_49	RGVC13967							1	M
flye-dairy_63287_31	RGVC14128	C10	Catlytic type: Cysteine; broad specificity with a hydrophobic residue in the P2 position	Organic Nitrogen	Peptidase		Bacterial cysteine endopeptidases	1	M
flye-dairy_6336_115	RGVC14140	K01939	adenylosuccinate synthase [EC:6.3.4.4] [RN:R01135]	MISC	Information systems	Nucleotide	Adenine ribonucleotide biosynthesis, IMP => ADP,ATP	2	M
flye-dairy_6336_169	RGVC14140							2	MK
flye-dairy_6336_55	RGVC14140	K01520	dUTP pyrophosphatase [EC:3.6.1.23] [RN:R02100]	MISC	Information systems	Nucleotide	Pyrimidine deoxyribonuleotide biosynthesis, CDP/CTP => dCDP/dCTP,dTDP/dTTP	2	M
flye-dairy_6336_61	RGVC14140	K21636	ribonucleoside-triphosphate reductase [EC:1.17.4.2 1.1.98.6] [RN:R02022 R11636]	MISC	Information systems	Nucleotide	Pyrimidine deoxyribonuleotide biosynthesis, CDP/CTP => dCDP/dCTP,dTDP/dTTP	2	M
flye-dairy_63689_25	RGVC14187	K00789	S-adenosylmethionine synthetase [EC:2.5.1.6] [RN:R00177]	Organic Nitrogen	Amino Acid		Methionine degradation	1	M
flye-dairy_64721_122	RGVC14291							1	MK
flye-dairy_64721_88	RGVC14291	K01520	dUTP pyrophosphatase [EC:3.6.1.23] [RN:R02100]	MISC	Information systems	Nucleotide	Pyrimidine deoxyribonuleotide biosynthesis, CDP/CTP => dCDP/dCTP,dTDP/dTTP	1	M
flye-dairy_64721_92	RGVC14291	K21636	ribonucleoside-triphosphate reductase [EC:1.17.4.2 1.1.98.6] [RN:R02022 R11636]	MISC	Information systems	Nucleotide	Pyrimidine deoxyribonuleotide biosynthesis, CDP/CTP => dCDP/dCTP,dTDP/dTTP	1	MKE
flye-dairy_64721_93	RGVC14291							1	MK
flye-dairy_64750_140	RGVC14293	K01520	dUTP pyrophosphatase [EC:3.6.1.23] [RN:R02100]	MISC	Information systems	Nucleotide	Pyrimidine deoxyribonuleotide biosynthesis, CDP/CTP => dCDP/dCTP,dTDP/dTTP	2	M
flye-dairy_65432_12	RGVC14358	K00789	S-adenosylmethionine synthetase [EC:2.5.1.6] [RN:R00177]	Organic Nitrogen	Amino Acid		Methionine degradation	2	MF
flye-dairy_65896_58	RGVC14408	K01520	dUTP pyrophosphatase [EC:3.6.1.23] [RN:R02100]	MISC	Information systems	Nucleotide	Pyrimidine deoxyribonuleotide biosynthesis, CDP/CTP => dCDP/dCTP,dTDP/dTTP	1	M
flye-dairy_66830_67	RGVC14523							2	MKE
flye-dairy_66830_70	RGVC14523	K21636	ribonucleoside-triphosphate reductase [EC:1.17.4.2 1.1.98.6] [RN:R02022 R11636]	MISC	Information systems	Nucleotide	Pyrimidine deoxyribonuleotide biosynthesis, CDP/CTP => dCDP/dCTP,dTDP/dTTP	2	M
flye-dairy_66830_79	RGVC14523	K01520	dUTP pyrophosphatase [EC:3.6.1.23] [RN:R02100]	MISC	Information systems	Nucleotide	Pyrimidine deoxyribonuleotide biosynthesis, CDP/CTP => dCDP/dCTP,dTDP/dTTP	2	M
flye-dairy_67557_13	RGVC14611	K01520	dUTP pyrophosphatase [EC:3.6.1.23] [RN:R02100]	MISC	Information systems	Nucleotide	Pyrimidine deoxyribonuleotide biosynthesis, CDP/CTP => dCDP/dCTP,dTDP/dTTP	1	M
flye-dairy_67557_64	RGVC14611	K21636	ribonucleoside-triphosphate reductase [EC:1.17.4.2 1.1.98.6] [RN:R02022 R11636]	MISC	Information systems	Nucleotide	Pyrimidine deoxyribonuleotide biosynthesis, CDP/CTP => dCDP/dCTP,dTDP/dTTP	1	MKE
flye-dairy_67557_66	RGVC14611							1	MK
flye-dairy_67557_68	RGVC14611	K00558	DNA (cytosine-5-)-methyltransferase [EC:2.1.1.37] [RN:R04858]	Organic Nitrogen	Amino Acid		Methionine degradation	1	M
flye-dairy_68612_104	RGVC14723	K01520	dUTP pyrophosphatase [EC:3.6.1.23] [RN:R02100]	MISC	Information systems	Nucleotide	Pyrimidine deoxyribonuleotide biosynthesis, CDP/CTP => dCDP/dCTP,dTDP/dTTP	2	M
flye-dairy_68612_180	RGVC14723							2	MK
flye-dairy_68612_49	RGVC14723	K01939	adenylosuccinate synthase [EC:6.3.4.4] [RN:R01135]	MISC	Information systems	Nucleotide	Adenine ribonucleotide biosynthesis, IMP => ADP,ATP	2	M
flye-dairy_68612_97	RGVC14723	K21636	ribonucleoside-triphosphate reductase [EC:1.17.4.2 1.1.98.6] [RN:R02022 R11636]	MISC	Information systems	Nucleotide	Pyrimidine deoxyribonuleotide biosynthesis, CDP/CTP => dCDP/dCTP,dTDP/dTTP	2	MKE
flye-dairy_69280_1_72	RGVC14793	K00558	DNA (cytosine-5-)-methyltransferase [EC:2.1.1.37] [RN:R04858]	Organic Nitrogen	Amino Acid		Methionine degradation	1	M
flye-dairy_69280_1_93	RGVC14793	K01494	dCTP deaminase [EC:3.5.4.13] [RN:R02325]	MISC	Information systems	Nucleotide	Pyrimidine deoxyribonuleotide biosynthesis, CDP/CTP => dCDP/dCTP,dTDP/dTTP	1	M
flye-dairy_70454_105	RGVC14927	K00525	ribonucleoside-diphosphate reductase [EC:1.17.4.1] [RN:R02024]	MISC	Information systems	Nucleotide	Pyrimidine deoxyribonuleotide biosynthesis, CDP/CTP => dCDP/dCTP,dTDP/dTTP	1	MKE
flye-dairy_70454_107	RGVC14927	K00525	ribonucleoside-diphosphate reductase [EC:1.17.4.1] [RN:R02024]	MISC	Information systems	Nucleotide	Pyrimidine deoxyribonuleotide biosynthesis, CDP/CTP => dCDP/dCTP,dTDP/dTTP	1	MKE
flye-dairy_70454_108	RGVC14927	K00525	ribonucleoside-diphosphate reductase [EC:1.17.4.1] [RN:R02024]	MISC	Information systems	Nucleotide	Pyrimidine deoxyribonuleotide biosynthesis, CDP/CTP => dCDP/dCTP,dTDP/dTTP	1	MKE
flye-dairy_71208_23	RGVC15036							2	M
flye-dairy_71261_2	RGVC15047	K01520	dUTP pyrophosphatase [EC:3.6.1.23] [RN:R02100]	MISC	Information systems	Nucleotide	Pyrimidine deoxyribonuleotide biosynthesis, CDP/CTP => dCDP/dCTP,dTDP/dTTP	2	MF
flye-dairy_71261_88	RGVC15047	K01939	adenylosuccinate synthase [EC:6.3.4.4] [RN:R01135]	MISC	Information systems	Nucleotide	Adenine ribonucleotide biosynthesis, IMP => ADP,ATP	2	M
flye-dairy_71391_57	RGVC15080	K01520	dUTP pyrophosphatase [EC:3.6.1.23] [RN:R02100]	MISC	Information systems	Nucleotide	Pyrimidine deoxyribonuleotide biosynthesis, CDP/CTP => dCDP/dCTP,dTDP/dTTP	2	M
flye-dairy_72631_88	RGVC15187	K01520	dUTP pyrophosphatase [EC:3.6.1.23] [RN:R02100]	MISC	Information systems	Nucleotide	Pyrimidine deoxyribonuleotide biosynthesis, CDP/CTP => dCDP/dCTP,dTDP/dTTP	1	M
flye-dairy_72657_136	RGVC15191	K01939	adenylosuccinate synthase [EC:6.3.4.4] [RN:R01135]	MISC	Information systems	Nucleotide	Adenine ribonucleotide biosynthesis, IMP => ADP,ATP	2	M
flye-dairy_72657_89	RGVC15191	K01520	dUTP pyrophosphatase [EC:3.6.1.23] [RN:R02100]	MISC	Information systems	Nucleotide	Pyrimidine deoxyribonuleotide biosynthesis, CDP/CTP => dCDP/dCTP,dTDP/dTTP	2	M
flye-dairy_72657_92	RGVC15191	K21636	ribonucleoside-triphosphate reductase [EC:1.17.4.2 1.1.98.6] [RN:R02022 R11636]	MISC	Information systems	Nucleotide	Pyrimidine deoxyribonuleotide biosynthesis, CDP/CTP => dCDP/dCTP,dTDP/dTTP	2	MKE
flye-dairy_72935_139	RGVC15213							2	MK
flye-dairy_72935_150	RGVC15213							2	MK
flye-dairy_72935_170	RGVC15213							1	M
flye-dairy_72935_207	RGVC15213	K01520	dUTP pyrophosphatase [EC:3.6.1.23] [RN:R02100]	MISC	Information systems	Nucleotide	Pyrimidine deoxyribonuleotide biosynthesis, CDP/CTP => dCDP/dCTP,dTDP/dTTP	1	M
flye-dairy_72975_32	RGVC15218							2	M
flye-dairy_73059_1_140	RGVC15221							2	MK
flye-dairy_73059_1_213	RGVC15221	K01520	dUTP pyrophosphatase [EC:3.6.1.23] [RN:R02100]	MISC	Information systems	Nucleotide	Pyrimidine deoxyribonuleotide biosynthesis, CDP/CTP => dCDP/dCTP,dTDP/dTTP	1	M
flye-dairy_73059_1_257	RGVC15221	K01939	adenylosuccinate synthase [EC:6.3.4.4] [RN:R01135]	MISC	Information systems	Nucleotide	Adenine ribonucleotide biosynthesis, IMP => ADP,ATP	1	M
flye-dairy_73059_1_287	RGVC15221							1	MK
flye-dairy_73178_159	RGVC15227							2	M
flye-dairy_73178_253	RGVC15227							2	MKE
flye-dairy_73211_25	RGVC15230	K21636	ribonucleoside-triphosphate reductase [EC:1.17.4.2 1.1.98.6] [RN:R02022 R11636]	MISC	Information systems	Nucleotide	Pyrimidine deoxyribonuleotide biosynthesis, CDP/CTP => dCDP/dCTP,dTDP/dTTP	2	M
flye-dairy_73502_12	RGVC15256							2	MK
flye-dairy_73502_124	RGVC15256	K01520	dUTP pyrophosphatase [EC:3.6.1.23] [RN:R02100]	MISC	Information systems	Nucleotide	Pyrimidine deoxyribonuleotide biosynthesis, CDP/CTP => dCDP/dCTP,dTDP/dTTP	2	M
flye-dairy_73502_131	RGVC15256	K21636	ribonucleoside-triphosphate reductase [EC:1.17.4.2 1.1.98.6] [RN:R02022 R11636]	MISC	Information systems	Nucleotide	Pyrimidine deoxyribonuleotide biosynthesis, CDP/CTP => dCDP/dCTP,dTDP/dTTP	2	M
flye-dairy_73502_134	RGVC15256	K21636	ribonucleoside-triphosphate reductase [EC:1.17.4.2 1.1.98.6] [RN:R02022 R11636]	MISC	Information systems	Nucleotide	Pyrimidine deoxyribonuleotide biosynthesis, CDP/CTP => dCDP/dCTP,dTDP/dTTP	2	MKE
flye-dairy_73677_7	RGVC15273							1	MF
flye-dairy_75328_159	RGVC15416	K01520	dUTP pyrophosphatase [EC:3.6.1.23] [RN:R02100]	MISC	Information systems	Nucleotide	Pyrimidine deoxyribonuleotide biosynthesis, CDP/CTP => dCDP/dCTP,dTDP/dTTP	2	M
flye-dairy_75328_163	RGVC15416	K21636	ribonucleoside-triphosphate reductase [EC:1.17.4.2 1.1.98.6] [RN:R02022 R11636]	MISC	Information systems	Nucleotide	Pyrimidine deoxyribonuleotide biosynthesis, CDP/CTP => dCDP/dCTP,dTDP/dTTP	2	MKE
flye-dairy_75546_200	RGVC15441	K01939	adenylosuccinate synthase [EC:6.3.4.4] [RN:R01135]	MISC	Information systems	Nucleotide	Adenine ribonucleotide biosynthesis, IMP => ADP,ATP	2	M
flye-dairy_75546_274	RGVC15441	K21636	ribonucleoside-triphosphate reductase [EC:1.17.4.2 1.1.98.6] [RN:R02022 R11636]	MISC	Information systems	Nucleotide	Pyrimidine deoxyribonuleotide biosynthesis, CDP/CTP => dCDP/dCTP,dTDP/dTTP	2	MKE
flye-dairy_75546_278	RGVC15441	K01520	dUTP pyrophosphatase [EC:3.6.1.23] [RN:R02100]	MISC	Information systems	Nucleotide	Pyrimidine deoxyribonuleotide biosynthesis, CDP/CTP => dCDP/dCTP,dTDP/dTTP	2	MF
flye-dairy_76393_72	RGVC15543							1	MK
flye-dairy_76393_75	RGVC15543							1	MK
flye-dairy_76393_77	RGVC15543	K01520	dUTP pyrophosphatase [EC:3.6.1.23] [RN:R02100]	MISC	Information systems	Nucleotide	Pyrimidine deoxyribonuleotide biosynthesis, CDP/CTP => dCDP/dCTP,dTDP/dTTP	1	M
flye-dairy_76393_86	RGVC15543	K21636	ribonucleoside-triphosphate reductase [EC:1.17.4.2 1.1.98.6] [RN:R02022 R11636]	MISC	Information systems	Nucleotide	Pyrimidine deoxyribonuleotide biosynthesis, CDP/CTP => dCDP/dCTP,dTDP/dTTP	1	MKE
flye-dairy_76393_87	RGVC15543							1	MK
flye-dairy_76611_1_12	RGVC15571							2	MK
flye-dairy_76611_1_202	RGVC15571	K00789	S-adenosylmethionine synthetase [EC:2.5.1.6] [RN:R00177]	Organic Nitrogen	Amino Acid		Methionine degradation	1	M
flye-dairy_76611_1_265	RGVC15571	K21636	ribonucleoside-triphosphate reductase [EC:1.17.4.2 1.1.98.6] [RN:R02022 R11636]	MISC	Information systems	Nucleotide	Pyrimidine deoxyribonuleotide biosynthesis, CDP/CTP => dCDP/dCTP,dTDP/dTTP	1	MKE
flye-dairy_76611_1_37	RGVC15571							1	MKE
flye-dairy_76611_1_57	RGVC15571							1	MK
flye-dairy_77201_164	RGVC15662	K01520	dUTP pyrophosphatase [EC:3.6.1.23] [RN:R02100]	MISC	Information systems	Nucleotide	Pyrimidine deoxyribonuleotide biosynthesis, CDP/CTP => dCDP/dCTP,dTDP/dTTP	1	M
flye-dairy_77201_171	RGVC15662	K21636	ribonucleoside-triphosphate reductase [EC:1.17.4.2 1.1.98.6] [RN:R02022 R11636]	MISC	Information systems	Nucleotide	Pyrimidine deoxyribonuleotide biosynthesis, CDP/CTP => dCDP/dCTP,dTDP/dTTP	1	M
flye-dairy_77201_177	RGVC15662							1	MKE
flye-dairy_77201_178	RGVC15662							1	MK
flye-dairy_77774_100	RGVC15739							1	MK
flye-dairy_77774_17	RGVC15739	K01520	dUTP pyrophosphatase [EC:3.6.1.23] [RN:R02100]	MISC	Information systems	Nucleotide	Pyrimidine deoxyribonuleotide biosynthesis, CDP/CTP => dCDP/dCTP,dTDP/dTTP	2	M
flye-dairy_77774_175	RGVC15739							1	MK
flye-dairy_77774_208	RGVC15739							1	MK
flye-dairy_77774_380	RGVC15739	K01885	EARS; glutamyl-tRNA synthetase [EC:6.1.1.17]	MISC	Information systems		Aminoacyl-tRNA biosynthesis, eukaryotes	2	MK
flye-dairy_77774_99	RGVC15739							1	MK
flye-dairy_78520_170	RGVC15882	K01520	dUTP pyrophosphatase [EC:3.6.1.23] [RN:R02100]	MISC	Information systems	Nucleotide	Pyrimidine deoxyribonuleotide biosynthesis, CDP/CTP => dCDP/dCTP,dTDP/dTTP	1	M
flye-dairy_78520_46	RGVC15882							2	MK
flye-dairy_78973_107	RGVC15971	K01520	dUTP pyrophosphatase [EC:3.6.1.23] [RN:R02100]	MISC	Information systems	Nucleotide	Pyrimidine deoxyribonuleotide biosynthesis, CDP/CTP => dCDP/dCTP,dTDP/dTTP	1	M
flye-dairy_78973_21	RGVC15971	C10	Catlytic type: Cysteine; broad specificity with a hydrophobic residue in the P2 position	Organic Nitrogen	Peptidase		Bacterial cysteine endopeptidases	1	M
flye-dairy_78973_25	RGVC15971							1	MK
flye-dairy_78973_96	RGVC15971	K00560	thymidylate synthase [EC:2.1.1.45] [RN:R02101]	MISC	Information systems	Nucleotide	Pyrimidine deoxyribonuleotide biosynthesis, CDP/CTP => dCDP/dCTP,dTDP/dTTP	1	M
flye-dairy_80593_65	RGVC16363	K00789	S-adenosylmethionine synthetase [EC:2.5.1.6] [RN:R00177]	Organic Nitrogen	Amino Acid		Methionine degradation	2	MF
flye-dairy_80626_26	RGVC16372	K00789	S-adenosylmethionine synthetase [EC:2.5.1.6] [RN:R00177]	Organic Nitrogen	Amino Acid		Methionine degradation	2	M
flye-dairy_80852_17	RGVC16439							1	MK
flye-dairy_80852_71	RGVC16439							1	MK
flye-dairy_80866_18	RGVC16448	K00789	S-adenosylmethionine synthetase [EC:2.5.1.6] [RN:R00177]	Organic Nitrogen	Amino Acid		Methionine degradation	2	M
flye-dairy_80991_13	RGVC16484	K01520	dUTP pyrophosphatase [EC:3.6.1.23] [RN:R02100]	MISC	Information systems	Nucleotide	Pyrimidine deoxyribonuleotide biosynthesis, CDP/CTP => dCDP/dCTP,dTDP/dTTP	2	M
flye-dairy_81075_28	RGVC16513	K01520	dUTP pyrophosphatase [EC:3.6.1.23] [RN:R02100]	MISC	Information systems	Nucleotide	Pyrimidine deoxyribonuleotide biosynthesis, CDP/CTP => dCDP/dCTP,dTDP/dTTP	1	M
flye-dairy_81075_33	RGVC16513	K21636	ribonucleoside-triphosphate reductase [EC:1.17.4.2 1.1.98.6] [RN:R02022 R11636]	MISC	Information systems	Nucleotide	Pyrimidine deoxyribonuleotide biosynthesis, CDP/CTP => dCDP/dCTP,dTDP/dTTP	1	M
flye-dairy_81075_80	RGVC16513							1	MK
flye-dairy_81203_122	RGVC16560							2	M
flye-dairy_81203_152	RGVC16560							2	MK
flye-dairy_81203_75	RGVC16560	K21636	ribonucleoside-triphosphate reductase [EC:1.17.4.2 1.1.98.6] [RN:R02022 R11636]	MISC	Information systems	Nucleotide	Pyrimidine deoxyribonuleotide biosynthesis, CDP/CTP => dCDP/dCTP,dTDP/dTTP	2	MKE
flye-dairy_81203_82	RGVC16560	K01520	dUTP pyrophosphatase [EC:3.6.1.23] [RN:R02100]	MISC	Information systems	Nucleotide	Pyrimidine deoxyribonuleotide biosynthesis, CDP/CTP => dCDP/dCTP,dTDP/dTTP	2	M
flye-dairy_81313_15	RGVC16646	K01520	dUTP pyrophosphatase [EC:3.6.1.23] [RN:R02100]	MISC	Information systems	Nucleotide	Pyrimidine deoxyribonuleotide biosynthesis, CDP/CTP => dCDP/dCTP,dTDP/dTTP	2	M
flye-dairy_8519_51	RGVC16665	K01520	dUTP pyrophosphatase [EC:3.6.1.23] [RN:R02100]	MISC	Information systems	Nucleotide	Pyrimidine deoxyribonuleotide biosynthesis, CDP/CTP => dCDP/dCTP,dTDP/dTTP	2	M
flye-goat_10060_1_17	RGVC16694	K00789	S-adenosylmethionine synthetase [EC:2.5.1.6] [RN:R00177]	Organic Nitrogen	Amino Acid		Methionine degradation	2	M
flye-goat_10060_1_21	RGVC16694	K00558	DNA (cytosine-5-)-methyltransferase [EC:2.1.1.37] [RN:R04858]	Organic Nitrogen	Amino Acid		Methionine degradation	2	M
flye-goat_15070_10	RGVC16816	M26	Catlytic type: Metallo; cleaves the heavy chain of human IgA1 at the Pro227-Thr228 bond; tightly associated with the bacterial cell surface	Organic Nitrogen	Peptidase		Endopeptidases	2	M
flye-goat_15070_13	RGVC16816	K00558	DNA (cytosine-5-)-methyltransferase [EC:2.1.1.37] [RN:R04858]	Organic Nitrogen	Amino Acid		Methionine degradation	2	M
flye-goat_15070_14	RGVC16816	K00558	DNA (cytosine-5-)-methyltransferase [EC:2.1.1.37] [RN:R04858]	Organic Nitrogen	Amino Acid		Methionine degradation	2	M
flye-goat_15773_1_33	RGVC16844	K01520	dUTP pyrophosphatase [EC:3.6.1.23] [RN:R02100]	MISC	Information systems	Nucleotide	Pyrimidine deoxyribonuleotide biosynthesis, CDP/CTP => dCDP/dCTP,dTDP/dTTP	2	M
flye-goat_15985_1_22	RGVC16856							1	MK
flye-goat_17135_119	RGVC16908							2	MK
flye-goat_18844_22	RGVC16952							2	M
flye-goat_18844_54	RGVC16952							2	MKF
flye-goat_19535_3	RGVC16989							2	MKF
flye-goat_19535_47	RGVC16989	K21636	ribonucleoside-triphosphate reductase [EC:1.17.4.2 1.1.98.6] [RN:R02022 R11636]	MISC	Information systems	Nucleotide	Pyrimidine deoxyribonuleotide biosynthesis, CDP/CTP => dCDP/dCTP,dTDP/dTTP	1	MKE
flye-goat_19535_49	RGVC16989	K21636	ribonucleoside-triphosphate reductase [EC:1.17.4.2 1.1.98.6] [RN:R02022 R11636]	MISC	Information systems	Nucleotide	Pyrimidine deoxyribonuleotide biosynthesis, CDP/CTP => dCDP/dCTP,dTDP/dTTP	1	M
flye-goat_19535_55	RGVC16989	K01520	dUTP pyrophosphatase [EC:3.6.1.23] [RN:R02100]	MISC	Information systems	Nucleotide	Pyrimidine deoxyribonuleotide biosynthesis, CDP/CTP => dCDP/dCTP,dTDP/dTTP	1	M
flye-goat_20018_110	RGVC17007	K01520	dUTP pyrophosphatase [EC:3.6.1.23] [RN:R02100]	MISC	Information systems	Nucleotide	Pyrimidine deoxyribonuleotide biosynthesis, CDP/CTP => dCDP/dCTP,dTDP/dTTP	1	M
flye-goat_20018_133	RGVC17007							1	MK
flye-goat_20018_160	RGVC17007	K21636	ribonucleoside-triphosphate reductase [EC:1.17.4.2 1.1.98.6] [RN:R02022 R11636]	MISC	Information systems	Nucleotide	Pyrimidine deoxyribonuleotide biosynthesis, CDP/CTP => dCDP/dCTP,dTDP/dTTP	1	M
flye-goat_20018_163	RGVC17007							1	M
flye-goat_20018_246	RGVC17007	K01939	adenylosuccinate synthase [EC:6.3.4.4] [RN:R01135]	MISC	Information systems	Nucleotide	Adenine ribonucleotide biosynthesis, IMP => ADP,ATP	2	M
flye-goat_20018_255	RGVC17007							2	MK
flye-goat_20018_331	RGVC17007							2	MK
flye-goat_20018_87	RGVC17007							1	MK
flye-goat_20027_1_13	RGVC17009	K00558	DNA (cytosine-5-)-methyltransferase [EC:2.1.1.37] [RN:R04858]	Organic Nitrogen	Amino Acid		Methionine degradation	2	M
flye-goat_20027_1_42	RGVC17009	K00789	S-adenosylmethionine synthetase [EC:2.5.1.6] [RN:R00177]	Organic Nitrogen	Amino Acid		Methionine degradation	2	M
flye-goat_20027_1_46	RGVC17009	K00558	DNA (cytosine-5-)-methyltransferase [EC:2.1.1.37] [RN:R04858]	Organic Nitrogen	Amino Acid		Methionine degradation	2	M
flye-goat_20306_127	RGVC17024	K01520	dUTP pyrophosphatase [EC:3.6.1.23] [RN:R02100]	MISC	Information systems	Nucleotide	Pyrimidine deoxyribonuleotide biosynthesis, CDP/CTP => dCDP/dCTP,dTDP/dTTP	1	M
flye-goat_20306_137	RGVC17024							1	MK
flye-goat_20306_171	RGVC17024	K01939	adenylosuccinate synthase [EC:6.3.4.4] [RN:R01135]	MISC	Information systems	Nucleotide	Adenine ribonucleotide biosynthesis, IMP => ADP,ATP	2	M
flye-goat_20306_185	RGVC17024	K00789	S-adenosylmethionine synthetase [EC:2.5.1.6] [RN:R00177]	Organic Nitrogen	Amino Acid		Methionine degradation	2	M
flye-goat_20306_20	RGVC17024	K02050	ABC.SN.P; sulfonate/nitrate/taurine transport system permease protein	Transporters			NitT/TauT family transport system	2	M
flye-goat_20306_9	RGVC17024							2	MK
flye-goat_20555_17	RGVC17051							1	MK
flye-goat_20555_33	RGVC17051	K01520	dUTP pyrophosphatase [EC:3.6.1.23] [RN:R02100]	MISC	Information systems	Nucleotide	Pyrimidine deoxyribonuleotide biosynthesis, CDP/CTP => dCDP/dCTP,dTDP/dTTP	1	M
flye-goat_2097_34	RGVC17082	K00558	DNA (cytosine-5-)-methyltransferase [EC:2.1.1.37] [RN:R04858]	Organic Nitrogen	Amino Acid		Methionine degradation	2	M
flye-goat_2097_39	RGVC17082	K02072	ABC.MET.P; D-methionine transport system permease protein	Transporters			D-Methionine transport system	2	M
flye-goat_2097_40	RGVC17082	K02073	ABC.MET.S; D-methionine transport system substrate-binding protein	Transporters			D-Methionine transport system	2	M
flye-goat_2097_43	RGVC17082	K00789	S-adenosylmethionine synthetase [EC:2.5.1.6] [RN:R00177]	Organic Nitrogen	Amino Acid		Methionine degradation	2	M
flye-goat_3319_1_13	RGVC17218	K00789	S-adenosylmethionine synthetase [EC:2.5.1.6] [RN:R00177]	Organic Nitrogen	Amino Acid		Methionine degradation	1	M
flye-goat_369_1_43	RGVC17227	K00558	DNA (cytosine-5-)-methyltransferase [EC:2.1.1.37] [RN:R04858]	Organic Nitrogen	Amino Acid		Methionine degradation	2	M
flye-goat_369_1_45	RGVC17227	K00789	S-adenosylmethionine synthetase [EC:2.5.1.6] [RN:R00177]	Organic Nitrogen	Amino Acid		Methionine degradation	2	M
flye-goat_5448_227	RGVC17287	K16923	qrtT; energy-coupling factor transport system substrate-specific component	Transporters			Energy-coupling factor transport system	1	M
flye-goat_5761_1_29	RGVC17302							1	MK
flye-goat_6904_1_24	RGVC17346							1	M
flye-goat_7368_1_264	RGVC17357	K21636	ribonucleoside-triphosphate reductase [EC:1.17.4.2 1.1.98.6] [RN:R02022 R11636]	MISC	Information systems	Nucleotide	Pyrimidine deoxyribonuleotide biosynthesis, CDP/CTP => dCDP/dCTP,dTDP/dTTP	1	MKE
flye-goat_7368_1_388	RGVC17357	U69	Self-processing occurs at the Ser846|+|Ala bond.	Organic Nitrogen	Peptidase		Self-processing peptidases	1	M
flye-goat_7368_1_52	RGVC17357							1	MK
flye-goat_7368_1_552	RGVC17357							2	MK
flye-goat_7368_1_574	RGVC17357							2	MK
flye-goat_7368_1_71	RGVC17357							1	MK
Goat_Abomasum-1__c343430_16	RGVC17452							1	MK
Goat_Abomasum-1__c343430_7	RGVC17452	K01520	dUTP pyrophosphatase [EC:3.6.1.23] [RN:R02100]	MISC	Information systems	Nucleotide	Pyrimidine deoxyribonuleotide biosynthesis, CDP/CTP => dCDP/dCTP,dTDP/dTTP	2	M
Goat_Abomasum-5__c169794_14	RGVC17552							2	MK
Goat_Abomasum-5__c169794_30	RGVC17552	K00558	DNA (cytosine-5-)-methyltransferase [EC:2.1.1.37] [RN:R04858]	Organic Nitrogen	Amino Acid		Methionine degradation	2	M
Goat_Abomasum-5__c296398_1_26	RGVC17558	K01520	dUTP pyrophosphatase [EC:3.6.1.23] [RN:R02100]	MISC	Information systems	Nucleotide	Pyrimidine deoxyribonuleotide biosynthesis, CDP/CTP => dCDP/dCTP,dTDP/dTTP	1	M
Goat_Abomasum-5__c296398_1_71	RGVC17558							1	MK
Goat_Abomasum-5__c296398_1_72	RGVC17558							1	MK
Goat_Abomasum-5__c296398_1_74	RGVC17558							1	MK
Goat_Abomasum-5__c315_103	RGVC17560	K02959	small subunit ribosomal protein S16	MISC	Information systems		Ribosome, bacteria	2	M
Goat_Abomasum-5__c315_106	RGVC17560							2	M
Goat_Abomasum-5__c315_111	RGVC17560	K00003	homoserine dehydrogenase [EC:1.1.1.3] [RN:R01773 R01775]	Organic Nitrogen	Amino Acid		Threonine biosynthesis, aspartate => homoserine => threonine	2	MK
Goat_Abomasum-5__c315_113	RGVC17560	K00133	aspartate-semialdehyde dehydrogenase [EC:1.2.1.11] [RN:R02291]	Organic Nitrogen	Amino Acid		Lysine biosynthesis, DAP aminotransferase pathway, aspartate => lysine	2	MK
Goat_Abomasum-5__c351007_27	RGVC17561							2	M
Goat_Abomasum-5__c354031_80	RGVC17562							2	MK
Goat_Abomasum-5__c354031_83	RGVC17562							2	MK
Goat_Abomasum-5__c485783_14	RGVC17577	K00558	DNA (cytosine-5-)-methyltransferase [EC:2.1.1.37] [RN:R04858]	Organic Nitrogen	Amino Acid		Methionine degradation	2	M
Goat_Abomasum-6__c126937_33	RGVC17593							2	M
Goat_Cecum-1__c1522_1_52	RGVC17627	K00558	DNA (cytosine-5-)-methyltransferase [EC:2.1.1.37] [RN:R04858]	Organic Nitrogen	Amino Acid		Methionine degradation	1	M
Goat_Cecum-1__c734749_116	RGVC17674	K01520	dUTP pyrophosphatase [EC:3.6.1.23] [RN:R02100]	MISC	Information systems	Nucleotide	Pyrimidine deoxyribonuleotide biosynthesis, CDP/CTP => dCDP/dCTP,dTDP/dTTP	1	M
Goat_Cecum-1__c734749_127	RGVC17674	K21636	ribonucleoside-triphosphate reductase [EC:1.17.4.2 1.1.98.6] [RN:R02022 R11636]	MISC	Information systems	Nucleotide	Pyrimidine deoxyribonuleotide biosynthesis, CDP/CTP => dCDP/dCTP,dTDP/dTTP	1	M
Goat_Cecum-2__c562318_12	RGVC17736							2	MK
Goat_Cecum-2__c562318_29	RGVC17736							2	MK
Goat_Cecum-2__c562318_40	RGVC17736	K00789	S-adenosylmethionine synthetase [EC:2.5.1.6] [RN:R00177]	Organic Nitrogen	Amino Acid		Methionine degradation	2	M
Goat_Cecum-2__c562318_8	RGVC17736							2	MK
Goat_Cecum-2__c562318_9	RGVC17736	K03340	diaminopimelate dehydrogenase [EC:1.4.1.16] [RN:R02755]	Organic Nitrogen	Amino Acid		Lysine biosynthesis, DAP dehydrogenase pathway, aspartate => lysine	2	M
Goat_Cecum-2__c571513_20	RGVC17737							2	M
Goat_Cecum-2__c571513_21	RGVC17737	K11072	potA; spermidine/putrescine transport system ATP-binding protein	Transporters			Spermidine/putrescine transport system	2	M
Goat_Cecum-2__c571513_23	RGVC17737	K11070	potC; spermidine/putrescine transport system permease protein	Transporters			Spermidine/putrescine transport system	2	M
Goat_Cecum-2__c571513_35	RGVC17737							2	MK
Goat_Cecum-2__c571513_71	RGVC17737							2	MK
Goat_Cecum-2__c571513_77	RGVC17737	C110	Catlytic type: Cysteine	Organic Nitrogen	Peptidase		Cysteine endopeptidases	2	M
Goat_Cecum-2__c571513_78	RGVC17737	K01596	phosphoenolpyruvate carboxykinase [EC:4.1.1.32 4.1.1.49] [RN:R00431 R00726 R00341]	carbon utilization	central carbon	glycolysis	Gluconeogenesis, oxaloacetate => fructose-6P	2	M
Goat_Cecum-2__c675186_36	RGVC17745	K00558	DNA (cytosine-5-)-methyltransferase [EC:2.1.1.37] [RN:R04858]	Organic Nitrogen	Amino Acid		Methionine degradation	2	M
Goat_Cecum-2__c96_72	RGVC17772	K04069	pyruvate formate lyase activating enzyme	carbon utilization	pyruvate metabolism		pyruvate metabolism	1	M
Goat_Cecum-2__c96_76	RGVC17772	K21636	ribonucleoside-triphosphate reductase [EC:1.17.4.2 1.1.98.6] [RN:R02022 R11636]	MISC	Information systems	Nucleotide	Pyrimidine deoxyribonuleotide biosynthesis, CDP/CTP => dCDP/dCTP,dTDP/dTTP	1	M
Goat_Cecum-3__c21_111	RGVC17782							2	MK
Goat_Cecum-3__c21_46	RGVC17782	K01520	dUTP pyrophosphatase [EC:3.6.1.23] [RN:R02100]	MISC	Information systems	Nucleotide	Pyrimidine deoxyribonuleotide biosynthesis, CDP/CTP => dCDP/dCTP,dTDP/dTTP	1	M
Goat_Cecum-3__c21_51	RGVC17782	K21636	ribonucleoside-triphosphate reductase [EC:1.17.4.2 1.1.98.6] [RN:R02022 R11636]	MISC	Information systems	Nucleotide	Pyrimidine deoxyribonuleotide biosynthesis, CDP/CTP => dCDP/dCTP,dTDP/dTTP	1	MKE
Goat_Cecum-3__c21_85	RGVC17782							2	MK
Goat_Cecum-3__c23_1_123	RGVC17784							2	MK
Goat_Cecum-3__c23_1_159	RGVC17784	K00789	S-adenosylmethionine synthetase [EC:2.5.1.6] [RN:R00177]	Organic Nitrogen	Amino Acid		Methionine degradation	2	M
Goat_Cecum-3__c23_1_211	RGVC17784	K21636	ribonucleoside-triphosphate reductase [EC:1.17.4.2 1.1.98.6] [RN:R02022 R11636]	MISC	Information systems	Nucleotide	Pyrimidine deoxyribonuleotide biosynthesis, CDP/CTP => dCDP/dCTP,dTDP/dTTP	2	MF
Goat_Cecum-3__c23_1_215	RGVC17784	K01520	dUTP pyrophosphatase [EC:3.6.1.23] [RN:R02100]	MISC	Information systems	Nucleotide	Pyrimidine deoxyribonuleotide biosynthesis, CDP/CTP => dCDP/dCTP,dTDP/dTTP	2	MF
Goat_Cecum-3__c27_1_18	RGVC17792	K00558	DNA (cytosine-5-)-methyltransferase [EC:2.1.1.37] [RN:R04858]	Organic Nitrogen	Amino Acid		Methionine degradation	1	M
Goat_Cecum-3__c890030_20	RGVC17840	K00789	S-adenosylmethionine synthetase [EC:2.5.1.6] [RN:R00177]	Organic Nitrogen	Amino Acid		Methionine degradation	2	M
Goat_Cecum-4__c197_1_23	RGVC17855	K01520	dUTP pyrophosphatase [EC:3.6.1.23] [RN:R02100]	MISC	Information systems	Nucleotide	Pyrimidine deoxyribonuleotide biosynthesis, CDP/CTP => dCDP/dCTP,dTDP/dTTP	2	M
Goat_Cecum-4__c197_1_42	RGVC17855	K21636	ribonucleoside-triphosphate reductase [EC:1.17.4.2 1.1.98.6] [RN:R02022 R11636]	MISC	Information systems	Nucleotide	Pyrimidine deoxyribonuleotide biosynthesis, CDP/CTP => dCDP/dCTP,dTDP/dTTP	2	M
Goat_Cecum-4__c412094_23	RGVC17871							2	MK
Goat_Cecum-4__c908298_1_44	RGVC17910	K00558	DNA (cytosine-5-)-methyltransferase [EC:2.1.1.37] [RN:R04858]	Organic Nitrogen	Amino Acid		Methionine degradation	1	M
Goat_Cecum-5__c127204_1_30	RGVC17918							2	MK
Goat_Cecum-5__c127204_1_47	RGVC17918							1	MK
Goat_Cecum-5__c127204_1_56	RGVC17918							1	MK
Goat_Cecum-5__c127204_1_76	RGVC17918							2	MK
Goat_Cecum-5__c127204_1_78	RGVC17918	K21636	ribonucleoside-triphosphate reductase [EC:1.17.4.2 1.1.98.6] [RN:R02022 R11636]	MISC	Information systems	Nucleotide	Pyrimidine deoxyribonuleotide biosynthesis, CDP/CTP => dCDP/dCTP,dTDP/dTTP	2	MF
Goat_Cecum-5__c174199_22	RGVC17923	K04041	fructose-1,6-bisphosphatase [EC:3.1.3.11] [RN:R00762]	Energy	C1		Reductive pentose phosphate cycle, glyceraldehyde-3P => ribulose-5P	2	M
Goat_Cecum-5__c174199_29	RGVC17923	K00943	dTMP kinase [EC:2.7.4.9] [RN:R02094]	MISC	Information systems	Nucleotide	Pyrimidine deoxyribonuleotide biosynthesis, CDP/CTP => dCDP/dCTP,dTDP/dTTP	2	M
Goat_Cecum-6__c502572_68	RGVC17983							1	MK
Goat_Cecum-6__c537878_1_25	RGVC17985	K00558	DNA (cytosine-5-)-methyltransferase [EC:2.1.1.37] [RN:R04858]	Organic Nitrogen	Amino Acid		Methionine degradation	2	M
Goat_Colon-1__c144_35	RGVC18009	K01756	adenylosuccinate lyase [EC:4.3.2.2] [RN:R01083]	MISC	Information systems	Nucleotide	Adenine ribonucleotide biosynthesis, IMP => ADP,ATP	1	MK
Goat_Colon-1__c144_41	RGVC18009	K01520	dUTP pyrophosphatase [EC:3.6.1.23] [RN:R02100]	MISC	Information systems	Nucleotide	Pyrimidine deoxyribonuleotide biosynthesis, CDP/CTP => dCDP/dCTP,dTDP/dTTP	1	M
Goat_Colon-1__c144_43	RGVC18009	K21636	ribonucleoside-triphosphate reductase [EC:1.17.4.2 1.1.98.6] [RN:R02022 R11636]	MISC	Information systems	Nucleotide	Pyrimidine deoxyribonuleotide biosynthesis, CDP/CTP => dCDP/dCTP,dTDP/dTTP	1	M
Goat_Colon-1__c144_45	RGVC18009							1	MK
Goat_Colon-1__c144_58	RGVC18009	K01939	adenylosuccinate synthase [EC:6.3.4.4] [RN:R01135]	MISC	Information systems	Nucleotide	Adenine ribonucleotide biosynthesis, IMP => ADP,ATP	1	M
Goat_Colon-2__c104854_22	RGVC18078	K21636	ribonucleoside-triphosphate reductase [EC:1.17.4.2 1.1.98.6] [RN:R02022 R11636]	MISC	Information systems	Nucleotide	Pyrimidine deoxyribonuleotide biosynthesis, CDP/CTP => dCDP/dCTP,dTDP/dTTP	2	M
Goat_Colon-2__c104854_25	RGVC18078	K01520	dUTP pyrophosphatase [EC:3.6.1.23] [RN:R02100]	MISC	Information systems	Nucleotide	Pyrimidine deoxyribonuleotide biosynthesis, CDP/CTP => dCDP/dCTP,dTDP/dTTP	2	M
Goat_Colon-2__c104854_98	RGVC18078							2	MK
Goat_Colon-2__c397106_1_30	RGVC18107	K00558	DNA (cytosine-5-)-methyltransferase [EC:2.1.1.37] [RN:R04858]	Organic Nitrogen	Amino Acid		Methionine degradation	2	M
Goat_Colon-2__c616157_1_191	RGVC18131	K21636	ribonucleoside-triphosphate reductase [EC:1.17.4.2 1.1.98.6] [RN:R02022 R11636]	MISC	Information systems	Nucleotide	Pyrimidine deoxyribonuleotide biosynthesis, CDP/CTP => dCDP/dCTP,dTDP/dTTP	2	MKEF
Goat_Colon-2__c616157_1_193	RGVC18131	K01520	dUTP pyrophosphatase [EC:3.6.1.23] [RN:R02100]	MISC	Information systems	Nucleotide	Pyrimidine deoxyribonuleotide biosynthesis, CDP/CTP => dCDP/dCTP,dTDP/dTTP	2	MF
Goat_Colon-2__c616157_1_58	RGVC18131							2	MK
Goat_Colon-3__c224456_1_58	RGVC18157							2	MK
Goat_Colon-3__c224456_1_64	RGVC18157							2	MK
Goat_Colon-3__c224456_1_74	RGVC18157	K01491	methylenetetrahydrofolate dehydrogenase (NADP+) / methenyltetrahydrofolate cyclohydrolase [EC:1.5.1.5 3.5.4.9] [RN:R01655 R01220]	Energy	C1		Reductive acetyl-CoA pathway (Wood-Ljungdahl pathway)	2	MK
Goat_Colon-3__c224456_1_91	RGVC18157							1	MK
Goat_Colon-4__c45271_1_11	RGVC18200							2	MK
Goat_Colon-5__c211784_126	RGVC18211	K00558	DNA (cytosine-5-)-methyltransferase [EC:2.1.1.37] [RN:R04858]	Organic Nitrogen	Amino Acid		Methionine degradation	2	M
Goat_Colon-5__c211784_59	RGVC18211	M95	Catlytic type: Metallo; member is abylysin (Pyrococcus abyssi)	Organic Nitrogen	Peptidase			2	M
Goat_Colon-5__c267425_108	RGVC18216							1	M
Goat_Colon-5__c267425_113	RGVC18216							1	MK
Goat_Colon-5__c267425_130	RGVC18216							1	MK
Goat_Colon-5__c267425_49	RGVC18216	K00558	DNA (cytosine-5-)-methyltransferase [EC:2.1.1.37] [RN:R04858]	Organic Nitrogen	Amino Acid		Methionine degradation	1	M
Goat_Colon-5__c267425_59	RGVC18216							1	MK
Goat_Colon-6__c160069_1_49	RGVC18230	K01520	dUTP pyrophosphatase [EC:3.6.1.23] [RN:R02100]	MISC	Information systems	Nucleotide	Pyrimidine deoxyribonuleotide biosynthesis, CDP/CTP => dCDP/dCTP,dTDP/dTTP	2	MF
Goat_Colon-6__c711957_38	RGVC18272							1	MK
Goat_Duodenum-1__c401_46	RGVC18352	K01520	dUTP pyrophosphatase [EC:3.6.1.23] [RN:R02100]	MISC	Information systems	Nucleotide	Pyrimidine deoxyribonuleotide biosynthesis, CDP/CTP => dCDP/dCTP,dTDP/dTTP	1	M
Goat_Duodenum-1__c401_79	RGVC18352							1	MK
Goat_Duodenum-2__c106317_30	RGVC18384	K00789	S-adenosylmethionine synthetase [EC:2.5.1.6] [RN:R00177]	Organic Nitrogen	Amino Acid		Methionine degradation	2	M
Goat_Duodenum-2__c84493_47	RGVC18397	K00789	S-adenosylmethionine synthetase [EC:2.5.1.6] [RN:R00177]	Organic Nitrogen	Amino Acid		Methionine degradation	2	MF
Goat_Duodenum-3__c228540_23	RGVC18424	K01520	dUTP pyrophosphatase [EC:3.6.1.23] [RN:R02100]	MISC	Information systems	Nucleotide	Pyrimidine deoxyribonuleotide biosynthesis, CDP/CTP => dCDP/dCTP,dTDP/dTTP	2	M
Goat_Ileum-1__c144068_1_53	RGVC18503	K01520	dUTP pyrophosphatase [EC:3.6.1.23] [RN:R02100]	MISC	Information systems	Nucleotide	Pyrimidine deoxyribonuleotide biosynthesis, CDP/CTP => dCDP/dCTP,dTDP/dTTP	2	M
Goat_Ileum-1__c25122_1_23	RGVC18517	K01494	dCTP deaminase [EC:3.5.4.13] [RN:R02325]	MISC	Information systems	Nucleotide	Pyrimidine deoxyribonuleotide biosynthesis, CDP/CTP => dCDP/dCTP,dTDP/dTTP	3	M
Goat_Ileum-2__c241616_35	RGVC18570	K01520	dUTP pyrophosphatase [EC:3.6.1.23] [RN:R02100]	MISC	Information systems	Nucleotide	Pyrimidine deoxyribonuleotide biosynthesis, CDP/CTP => dCDP/dCTP,dTDP/dTTP	2	M
Goat_Ileum-6__c73_74	RGVC18720	K01520	dUTP pyrophosphatase [EC:3.6.1.23] [RN:R02100]	MISC	Information systems	Nucleotide	Pyrimidine deoxyribonuleotide biosynthesis, CDP/CTP => dCDP/dCTP,dTDP/dTTP	1	M
Goat_Jejunum-1__c180089_1_18	RGVC18749	K00789	S-adenosylmethionine synthetase [EC:2.5.1.6] [RN:R00177]	Organic Nitrogen	Amino Acid		Methionine degradation	2	M
Goat_Jejunum-1__c180089_1_20	RGVC18749	K00558	DNA (cytosine-5-)-methyltransferase [EC:2.1.1.37] [RN:R04858]	Organic Nitrogen	Amino Acid		Methionine degradation	2	M
Goat_Jejunum-1__c180089_1_29	RGVC18749							1	MK
Goat_Jejunum-1__c325452_3	RGVC18766							2	MF
Goat_Jejunum-1__c386466_63	RGVC18774	K01520	dUTP pyrophosphatase [EC:3.6.1.23] [RN:R02100]	MISC	Information systems	Nucleotide	Pyrimidine deoxyribonuleotide biosynthesis, CDP/CTP => dCDP/dCTP,dTDP/dTTP	2	M
Goat_Jejunum-2__c215395_1_58	RGVC18827	K00558	DNA (cytosine-5-)-methyltransferase [EC:2.1.1.37] [RN:R04858]	Organic Nitrogen	Amino Acid		Methionine degradation	2	M
Goat_Jejunum-3__c265040_19	RGVC18929							2	MK
Goat_Jejunum-3__c265040_45	RGVC18929	K21636	ribonucleoside-triphosphate reductase [EC:1.17.4.2 1.1.98.6] [RN:R02022 R11636]	MISC	Information systems	Nucleotide	Pyrimidine deoxyribonuleotide biosynthesis, CDP/CTP => dCDP/dCTP,dTDP/dTTP	2	M
Goat_Jejunum-3__c265040_54	RGVC18929	K01520	dUTP pyrophosphatase [EC:3.6.1.23] [RN:R02100]	MISC	Information systems	Nucleotide	Pyrimidine deoxyribonuleotide biosynthesis, CDP/CTP => dCDP/dCTP,dTDP/dTTP	2	M
Goat_Jejunum-3__c290795_82	RGVC18938	K10218	ligK; 4-hydroxy-4-methyl-2-oxoglutarate aldolase [EC:4.1.3.17]	carbon utilization	hydrocarbon degradation		protocatechuate degradation, protocatechuate => oxaloacteate + pyruvate	2	M
Goat_Jejunum-3__c290795_83	RGVC18938							2	MK
Goat_Jejunum-3__c381465_54	RGVC18961	K01520	dUTP pyrophosphatase [EC:3.6.1.23] [RN:R02100]	MISC	Information systems	Nucleotide	Pyrimidine deoxyribonuleotide biosynthesis, CDP/CTP => dCDP/dCTP,dTDP/dTTP	2	M
Goat_Jejunum-5__c136718_147	RGVC19013	K00558	DNA (cytosine-5-)-methyltransferase [EC:2.1.1.37] [RN:R04858]	Organic Nitrogen	Amino Acid		Methionine degradation	2	M
Goat_Jejunum-5__c195313_122	RGVC19026	K02970	small subunit ribosomal protein S21	MISC	Information systems		Ribosome, bacteria	1	M
Goat_Jejunum-5__c195313_18	RGVC19026							2	M
Goat_Jejunum-5__c195313_22	RGVC19026	K01520	dUTP pyrophosphatase [EC:3.6.1.23] [RN:R02100]	MISC	Information systems	Nucleotide	Pyrimidine deoxyribonuleotide biosynthesis, CDP/CTP => dCDP/dCTP,dTDP/dTTP	2	M
Goat_Jejunum-5__c195313_57	RGVC19026	K21636	ribonucleoside-triphosphate reductase [EC:1.17.4.2 1.1.98.6] [RN:R02022 R11636]	MISC	Information systems	Nucleotide	Pyrimidine deoxyribonuleotide biosynthesis, CDP/CTP => dCDP/dCTP,dTDP/dTTP	2	M
Goat_Jejunum-5__c231_128	RGVC19029							1	MK
Goat_Jejunum-5__c231_203	RGVC19029	K00558	DNA (cytosine-5-)-methyltransferase [EC:2.1.1.37] [RN:R04858]	Organic Nitrogen	Amino Acid		Methionine degradation	2	MF
Goat_Jejunum-5__c231_36	RGVC19029	K00558	DNA (cytosine-5-)-methyltransferase [EC:2.1.1.37] [RN:R04858]	Organic Nitrogen	Amino Acid		Methionine degradation	1	M
Goat_Jejunum-6__c120093_36	RGVC19072	K00943	dTMP kinase [EC:2.7.4.9] [RN:R02094]	MISC	Information systems	Nucleotide	Pyrimidine deoxyribonuleotide biosynthesis, CDP/CTP => dCDP/dCTP,dTDP/dTTP	1	M
Goat_Jejunum-6__c12130_163	RGVC19073							2	MK
Goat_Jejunum-6__c12130_165	RGVC19073							2	MK
Goat_Jejunum-6__c12130_189	RGVC19073							2	MK
Goat_Jejunum-6__c12130_40	RGVC19073	K00943	dTMP kinase [EC:2.7.4.9] [RN:R02094]	MISC	Information systems	Nucleotide	Pyrimidine deoxyribonuleotide biosynthesis, CDP/CTP => dCDP/dCTP,dTDP/dTTP	2	M
Goat_Jejunum-6__c12130_47	RGVC19073	K21636	ribonucleoside-triphosphate reductase [EC:1.17.4.2 1.1.98.6] [RN:R02022 R11636]	MISC	Information systems	Nucleotide	Pyrimidine deoxyribonuleotide biosynthesis, CDP/CTP => dCDP/dCTP,dTDP/dTTP	2	M
Goat_Jejunum-6__c12130_86	RGVC19073	K01520	dUTP pyrophosphatase [EC:3.6.1.23] [RN:R02100]	MISC	Information systems	Nucleotide	Pyrimidine deoxyribonuleotide biosynthesis, CDP/CTP => dCDP/dCTP,dTDP/dTTP	2	M
Goat_Omasum-1__c203740_256	RGVC19124							3	MK
Goat_Omasum-2__c131045_10	RGVC19162	K02003	ABC.CD.A;	Transporters			Putative ABC transport system	2	M
Goat_Omasum-2__c131045_5	RGVC19162	K00558	DNA (cytosine-5-)-methyltransferase [EC:2.1.1.37] [RN:R04858]	Organic Nitrogen	Amino Acid		Methionine degradation	2	M
Goat_Omasum-2__c481628_1_92	RGVC19182							2	MKF
Goat_Omasum-3__c697174_44	RGVC19233							3	MK
Goat_Omasum-4__c1_223	RGVC19242	K02050	ABC.SN.P; sulfonate/nitrate/taurine transport system permease protein	Transporters			NitT/TauT family transport system	2	M
Goat_Omasum-4__c1_240	RGVC19242							2	MK
Goat_Omasum-4__c1_338	RGVC19242	K21636	ribonucleoside-triphosphate reductase [EC:1.17.4.2 1.1.98.6] [RN:R02022 R11636]	MISC	Information systems	Nucleotide	Pyrimidine deoxyribonuleotide biosynthesis, CDP/CTP => dCDP/dCTP,dTDP/dTTP	1	M
Goat_Omasum-4__c1_339	RGVC19242	K21636	ribonucleoside-triphosphate reductase [EC:1.17.4.2 1.1.98.6] [RN:R02022 R11636]	MISC	Information systems	Nucleotide	Pyrimidine deoxyribonuleotide biosynthesis, CDP/CTP => dCDP/dCTP,dTDP/dTTP	1	MKE
Goat_Omasum-4__c1_380	RGVC19242	K01520	dUTP pyrophosphatase [EC:3.6.1.23] [RN:R02100]	MISC	Information systems	Nucleotide	Pyrimidine deoxyribonuleotide biosynthesis, CDP/CTP => dCDP/dCTP,dTDP/dTTP	1	M
Goat_Omasum-4__c1_435	RGVC19242							2	MK
Goat_Omasum-5__c257402_103	RGVC19291	K21636	ribonucleoside-triphosphate reductase [EC:1.17.4.2 1.1.98.6] [RN:R02022 R11636]	MISC	Information systems	Nucleotide	Pyrimidine deoxyribonuleotide biosynthesis, CDP/CTP => dCDP/dCTP,dTDP/dTTP	1	MKE
Goat_Omasum-6__c1499_14	RGVC19321	K00558	DNA (cytosine-5-)-methyltransferase [EC:2.1.1.37] [RN:R04858]	Organic Nitrogen	Amino Acid		Methionine degradation	2	M
Goat_Rectum-1__c230_210	RGVC19370							1	MK
Goat_Rectum-1__c329200_15	RGVC19377							2	M
Goat_Rectum-1__c656676_32	RGVC19403	K01520	dUTP pyrophosphatase [EC:3.6.1.23] [RN:R02100]	MISC	Information systems	Nucleotide	Pyrimidine deoxyribonuleotide biosynthesis, CDP/CTP => dCDP/dCTP,dTDP/dTTP	2	MF
Goat_Rectum-5__c567531_1_10	RGVC19592	K00789	S-adenosylmethionine synthetase [EC:2.5.1.6] [RN:R00177]	Organic Nitrogen	Amino Acid		Methionine degradation	2	M
Goat_Rectum-6__c276309_18	RGVC19616	K00558	DNA (cytosine-5-)-methyltransferase [EC:2.1.1.37] [RN:R04858]	Organic Nitrogen	Amino Acid		Methionine degradation	2	M
Goat_Reticulum-2__c527486_1_47	RGVC19717							1	MK
Goat_Reticulum-2__c527486_1_49	RGVC19717							1	MK
Goat_Reticulum-2__c527486_1_50	RGVC19717							1	MK
Goat_Reticulum-3__c318819_1_21	RGVC19745	K00558	DNA (cytosine-5-)-methyltransferase [EC:2.1.1.37] [RN:R04858]	Organic Nitrogen	Amino Acid		Methionine degradation	1	M
Goat_Reticulum-3__c327544_24	RGVC19747							1	MK
Goat_Reticulum-4__c82584_1_70	RGVC19797	K00558	DNA (cytosine-5-)-methyltransferase [EC:2.1.1.37] [RN:R04858]	Organic Nitrogen	Amino Acid		Methionine degradation	2	M
Goat_Reticulum-4__c82584_1_90	RGVC19797	C110	Catlytic type: Cysteine	Organic Nitrogen	Peptidase		Cysteine endopeptidases	1	M
Goat_Reticulum-5__c146092_1_36	RGVC19805	K00558	DNA (cytosine-5-)-methyltransferase [EC:2.1.1.37] [RN:R04858]	Organic Nitrogen	Amino Acid		Methionine degradation	1	M
Goat_Reticulum-6__c413895_1_26	RGVC19858	K00558	DNA (cytosine-5-)-methyltransferase [EC:2.1.1.37] [RN:R04858]	Organic Nitrogen	Amino Acid		Methionine degradation	2	M
Goat_Reticulum-6__c604_1_29	RGVC19866	K00789	S-adenosylmethionine synthetase [EC:2.5.1.6] [RN:R00177]	Organic Nitrogen	Amino Acid		Methionine degradation	2	M
Goat_Rumen-1__c1721_60	RGVC19881	K00558	DNA (cytosine-5-)-methyltransferase [EC:2.1.1.37] [RN:R04858]	Organic Nitrogen	Amino Acid		Methionine degradation	2	MF
Goat_Rumen-1__c532612_1_21	RGVC19941							2	MK
Goat_Rumen-1__c63782_1_100	RGVC19956							2	MKF
Goat_Rumen-1__c63782_1_68	RGVC19956	K00558	DNA (cytosine-5-)-methyltransferase [EC:2.1.1.37] [RN:R04858]	Organic Nitrogen	Amino Acid		Methionine degradation	1	M
Goat_Rumen-1__c63782_1_96	RGVC19956							2	MK
Goat_Rumen-1__c63782_1_98	RGVC19956							2	MK
Goat_Rumen-1__c685851_129	RGVC19960	K01520	dUTP pyrophosphatase [EC:3.6.1.23] [RN:R02100]	MISC	Information systems	Nucleotide	Pyrimidine deoxyribonuleotide biosynthesis, CDP/CTP => dCDP/dCTP,dTDP/dTTP	2	M
Goat_Rumen-2__c249228_127	RGVC20060	K01520	dUTP pyrophosphatase [EC:3.6.1.23] [RN:R02100]	MISC	Information systems	Nucleotide	Pyrimidine deoxyribonuleotide biosynthesis, CDP/CTP => dCDP/dCTP,dTDP/dTTP	2	M
Goat_Rumen-2__c249228_128	RGVC20060	K01520	dUTP pyrophosphatase [EC:3.6.1.23] [RN:R02100]	MISC	Information systems	Nucleotide	Pyrimidine deoxyribonuleotide biosynthesis, CDP/CTP => dCDP/dCTP,dTDP/dTTP	2	M
Goat_Rumen-2__c308307_27	RGVC20078							1	MK
Goat_Rumen-2__c663493_105	RGVC20123	K01520	dUTP pyrophosphatase [EC:3.6.1.23] [RN:R02100]	MISC	Information systems	Nucleotide	Pyrimidine deoxyribonuleotide biosynthesis, CDP/CTP => dCDP/dCTP,dTDP/dTTP	1	M
Goat_Rumen-2__c663493_131	RGVC20123	K21636	ribonucleoside-triphosphate reductase [EC:1.17.4.2 1.1.98.6] [RN:R02022 R11636]	MISC	Information systems	Nucleotide	Pyrimidine deoxyribonuleotide biosynthesis, CDP/CTP => dCDP/dCTP,dTDP/dTTP	1	MKE
Goat_Rumen-2__c663493_253	RGVC20123							1	MK
Goat_Rumen-2__c663493_419	RGVC20123							2	MK
Goat_Rumen-2__c663493_474	RGVC20123							2	MK
Goat_Rumen-2__c688690_19	RGVC20135	K01520	dUTP pyrophosphatase [EC:3.6.1.23] [RN:R02100]	MISC	Information systems	Nucleotide	Pyrimidine deoxyribonuleotide biosynthesis, CDP/CTP => dCDP/dCTP,dTDP/dTTP	2	M
Goat_Rumen-2__c822884_10	RGVC20159							2	MK
Goat_Rumen-2__c822884_36	RGVC20159							1	MK
Goat_Rumen-2__c822884_39	RGVC20159							1	MK
Goat_Rumen-3__c230275_17	RGVC20217	K00558	DNA (cytosine-5-)-methyltransferase [EC:2.1.1.37] [RN:R04858]	Organic Nitrogen	Amino Acid		Methionine degradation	2	M
Goat_Rumen-3__c450056_47	RGVC20256							2	MK
Goat_Rumen-3__c450056_49	RGVC20256							2	MK
Goat_Rumen-3__c450056_55	RGVC20256							2	MK
Goat_Rumen-3__c450056_58	RGVC20256							2	MK
Goat_Rumen-3__c450056_86	RGVC20256	K21636	ribonucleoside-triphosphate reductase [EC:1.17.4.2 1.1.98.6] [RN:R02022 R11636]	MISC	Information systems	Nucleotide	Pyrimidine deoxyribonuleotide biosynthesis, CDP/CTP => dCDP/dCTP,dTDP/dTTP	2	M
Goat_Rumen-3__c540_107	RGVC20275							1	MK
Goat_Rumen-3__c540_123	RGVC20275	K21636	ribonucleoside-triphosphate reductase [EC:1.17.4.2 1.1.98.6] [RN:R02022 R11636]	MISC	Information systems	Nucleotide	Pyrimidine deoxyribonuleotide biosynthesis, CDP/CTP => dCDP/dCTP,dTDP/dTTP	1	MKE
Goat_Rumen-3__c540_25	RGVC20275	K01520	dUTP pyrophosphatase [EC:3.6.1.23] [RN:R02100]	MISC	Information systems	Nucleotide	Pyrimidine deoxyribonuleotide biosynthesis, CDP/CTP => dCDP/dCTP,dTDP/dTTP	1	M
Goat_Rumen-4__c100029_39	RGVC20339	K01520	dUTP pyrophosphatase [EC:3.6.1.23] [RN:R02100]	MISC	Information systems	Nucleotide	Pyrimidine deoxyribonuleotide biosynthesis, CDP/CTP => dCDP/dCTP,dTDP/dTTP	1	M
Goat_Rumen-4__c466254_23	RGVC20372	K00558	DNA (cytosine-5-)-methyltransferase [EC:2.1.1.37] [RN:R04858]	Organic Nitrogen	Amino Acid		Methionine degradation	2	M
Goat_Rumen-4__c487512_1_27	RGVC20373	K01243	S-adenosylhomocysteine/5'-methylthioadenosine nucleosidase [EC:3.2.2.9] [RN:R00194]	Organic Nitrogen	Amino Acid		Cysteine biosynthesis, methionine => cysteine	2	MK
Goat_Rumen-4__c546750_1_16	RGVC20381	K01945	phosphoribosylamine--glycine ligase [EC:6.3.4.13] [RN:R04144]	MISC	Information systems	Nucleotide	Inosine monophosphate biosynthesis, PRPP + glutamine => IMP	2	M
Goat_Rumen-4__c546750_1_17	RGVC20381							2	M
Goat_Rumen-4__c546750_1_42	RGVC20381	K00558	DNA (cytosine-5-)-methyltransferase [EC:2.1.1.37] [RN:R04858]	Organic Nitrogen	Amino Acid		Methionine degradation	2	M
Goat_Rumen-4__c694_1_64	RGVC20396	K00558	DNA (cytosine-5-)-methyltransferase [EC:2.1.1.37] [RN:R04858]	Organic Nitrogen	Amino Acid		Methionine degradation	2	M
Goat_Rumen-5__c1031294_34	RGVC20417	K00558	DNA (cytosine-5-)-methyltransferase [EC:2.1.1.37] [RN:R04858]	Organic Nitrogen	Amino Acid		Methionine degradation	2	M
Goat_Rumen-5__c1137_1_9	RGVC20425							2	MF
Goat_Rumen-5__c165385_29	RGVC20436	K00558	DNA (cytosine-5-)-methyltransferase [EC:2.1.1.37] [RN:R04858]	Organic Nitrogen	Amino Acid		Methionine degradation	2	M
Goat_Rumen-5__c165385_42	RGVC20436							2	MK
Goat_Rumen-5__c482729_19	RGVC20497	K00088	IMP dehydrogenase [EC:1.1.1.205] [RN:R01130]	MISC	Information systems	Nucleotide	Guanine ribonucleotide biosynthesis IMP => GDP,GTP	1	M
Goat_Rumen-5__c630917_8	RGVC20525							3	MK
Goat_Rumen-6__c488_108	RGVC20640	K21636	ribonucleoside-triphosphate reductase [EC:1.17.4.2 1.1.98.6] [RN:R02022 R11636]	MISC	Information systems	Nucleotide	Pyrimidine deoxyribonuleotide biosynthesis, CDP/CTP => dCDP/dCTP,dTDP/dTTP	2	M
Goat_Rumen-6__c488_114	RGVC20640	K01520	dUTP pyrophosphatase [EC:3.6.1.23] [RN:R02100]	MISC	Information systems	Nucleotide	Pyrimidine deoxyribonuleotide biosynthesis, CDP/CTP => dCDP/dCTP,dTDP/dTTP	2	M
Goat_Rumen-6__c488_38	RGVC20640							2	MK
Goat_Rumen-6__c504018_1_67	RGVC20644	K01520	dUTP pyrophosphatase [EC:3.6.1.23] [RN:R02100]	MISC	Information systems	Nucleotide	Pyrimidine deoxyribonuleotide biosynthesis, CDP/CTP => dCDP/dCTP,dTDP/dTTP	2	M
Goat_Rumen-6__c757077_1_111	RGVC20669	K01458	N-formylglutamate deformylase [EC:3.5.1.68] [RN:R00525]	Organic Nitrogen	Amino Acid		Histidine degradation, histidine => N-formiminoglutamate => glutamate	2	MK
Goat_Rumen-6__c757077_1_119	RGVC20669							2	MK
Goat_Rumen-6__c757077_1_78	RGVC20669	K00558	DNA (cytosine-5-)-methyltransferase [EC:2.1.1.37] [RN:R04858]	Organic Nitrogen	Amino Acid		Methionine degradation	1	M
Roe_deer_Abomasum-1__c2602_1_46	RGVC20725	K00558	DNA (cytosine-5-)-methyltransferase [EC:2.1.1.37] [RN:R04858]	Organic Nitrogen	Amino Acid		Methionine degradation	2	M
Roe_deer_Abomasum-1__c2602_1_87	RGVC20725	K00290	saccharopine dehydrogenase [EC:1.5.1.7] [RN:R00715]	Organic Nitrogen	Amino Acid		Lysine degradation, lysine => saccharopine => acetoacetyl-CoA	1	MK
Roe_deer_Abomasum-2__c165_1_44	RGVC20751	K00290	saccharopine dehydrogenase [EC:1.5.1.7] [RN:R00715]	Organic Nitrogen	Amino Acid		Lysine degradation, lysine => saccharopine => acetoacetyl-CoA	2	MK
Roe_deer_Abomasum-2__c440_122	RGVC20756							1	MK
Roe_deer_Abomasum-2__c440_177	RGVC20756	K01520	dUTP pyrophosphatase [EC:3.6.1.23] [RN:R02100]	MISC	Information systems	Nucleotide	Pyrimidine deoxyribonuleotide biosynthesis, CDP/CTP => dCDP/dCTP,dTDP/dTTP	2	M
Roe_deer_Abomasum-2__c440_178	RGVC20756	K00558	DNA (cytosine-5-)-methyltransferase [EC:2.1.1.37] [RN:R04858]	Organic Nitrogen	Amino Acid		Methionine degradation	2	MF
Roe_deer_Abomasum-2__c440_64	RGVC20756	K01520	dUTP pyrophosphatase [EC:3.6.1.23] [RN:R02100]	MISC	Information systems	Nucleotide	Pyrimidine deoxyribonuleotide biosynthesis, CDP/CTP => dCDP/dCTP,dTDP/dTTP	1	M
Roe_deer_Abomasum-2__c440_65	RGVC20756	K00558	DNA (cytosine-5-)-methyltransferase [EC:2.1.1.37] [RN:R04858]	Organic Nitrogen	Amino Acid		Methionine degradation	1	M
Roe_deer_Abomasum-2__c440_9	RGVC20756							2	MK
Roe_deer_Abomasum-4__c1350_55	RGVC20791							1	MK
Roe_deer_Abomasum-4__c1350_64	RGVC20791	K01520	dUTP pyrophosphatase [EC:3.6.1.23] [RN:R02100]	MISC	Information systems	Nucleotide	Pyrimidine deoxyribonuleotide biosynthesis, CDP/CTP => dCDP/dCTP,dTDP/dTTP	2	M
Roe_deer_Abomasum-5__c1468_10	RGVC20829							1	MK
Roe_deer_Abomasum-5__c1468_26	RGVC20829	K21636	ribonucleoside-triphosphate reductase [EC:1.17.4.2 1.1.98.6] [RN:R02022 R11636]	MISC	Information systems	Nucleotide	Pyrimidine deoxyribonuleotide biosynthesis, CDP/CTP => dCDP/dCTP,dTDP/dTTP	1	MKE
Roe_deer_Abomasum-5__c1468_59	RGVC20829	K01520	dUTP pyrophosphatase [EC:3.6.1.23] [RN:R02100]	MISC	Information systems	Nucleotide	Pyrimidine deoxyribonuleotide biosynthesis, CDP/CTP => dCDP/dCTP,dTDP/dTTP	2	M
Roe_deer_Cecum-1__c2089_16	RGVC20935							2	M
Roe_deer_Cecum-1__c2089_41	RGVC20935							2	MK
Roe_deer_Cecum-1__c2089_8	RGVC20935							2	MK
Roe_deer_Cecum-1__c235427_13	RGVC20948							2	MK
Roe_deer_Cecum-1__c235427_21	RGVC20948	K00215	4-hydroxy-tetrahydrodipicolinate reductase [EC:1.17.1.8] [RN:R04198 R04199]	Organic Nitrogen	Amino Acid		Lysine biosynthesis, DAP aminotransferase pathway, aspartate => lysine	2	M
Roe_deer_Cecum-1__c235427_23	RGVC20948							2	MK
Roe_deer_Cecum-1__c235427_24	RGVC20948							2	MK
Roe_deer_Cecum-1__c235427_26	RGVC20948							2	MK
Roe_deer_Cecum-1__c235427_29	RGVC20948	K00133	aspartate-semialdehyde dehydrogenase [EC:1.2.1.11] [RN:R02291]	Organic Nitrogen	Amino Acid		Lysine biosynthesis, DAP aminotransferase pathway, aspartate => lysine	2	MK
Roe_deer_Cecum-1__c235427_57	RGVC20948	K17244	chiE; putative chitobiose transport system substrate-binding protein	Transporters			Putative chitobiose transport system	2	M
Roe_deer_Cecum-1__c235427_61	RGVC20948							2	MK
Roe_deer_Cecum-1__c235427_62	RGVC20948	K02421	flagellar biosynthetic protein FliR	MISC	Flagella Structure		Flagellar Assembly	2	M
Roe_deer_Cecum-1__c235427_64	RGVC20948	K02419	flagellar biosynthetic protein FliP	MISC	Flagella Structure		Flagellar Assembly	2	M
Roe_deer_Cecum-1__c235427_65	RGVC20948	K02418	flagellar protein FliO/FliZ	MISC	Flagella Structure		Flagellar Assembly	2	M
Roe_deer_Cecum-1__c358_277	RGVC20986							1	MK
Roe_deer_Cecum-1__c358_278	RGVC20986							1	MK
Roe_deer_Cecum-1__c358_49	RGVC20986							1	MKE
Roe_deer_Cecum-1__c358_50	RGVC20986	K21636	ribonucleoside-triphosphate reductase [EC:1.17.4.2 1.1.98.6] [RN:R02022 R11636]	MISC	Information systems	Nucleotide	Pyrimidine deoxyribonuleotide biosynthesis, CDP/CTP => dCDP/dCTP,dTDP/dTTP	1	M
Roe_deer_Cecum-1__c358_56	RGVC20986	K01520	dUTP pyrophosphatase [EC:3.6.1.23] [RN:R02100]	MISC	Information systems	Nucleotide	Pyrimidine deoxyribonuleotide biosynthesis, CDP/CTP => dCDP/dCTP,dTDP/dTTP	1	M
Roe_deer_Cecum-1__c425025_22	RGVC21000	K00558	DNA (cytosine-5-)-methyltransferase [EC:2.1.1.37] [RN:R04858]	Organic Nitrogen	Amino Acid		Methionine degradation	2	M
Roe_deer_Cecum-2__c1189_26	RGVC21093	K01520	dUTP pyrophosphatase [EC:3.6.1.23] [RN:R02100]	MISC	Information systems	Nucleotide	Pyrimidine deoxyribonuleotide biosynthesis, CDP/CTP => dCDP/dCTP,dTDP/dTTP	2	M
Roe_deer_Cecum-2__c1282_1_24	RGVC21094	K00558	DNA (cytosine-5-)-methyltransferase [EC:2.1.1.37] [RN:R04858]	Organic Nitrogen	Amino Acid		Methionine degradation	2	M
Roe_deer_Cecum-2__c1492_56	RGVC21103							2	MKF
Roe_deer_Cecum-2__c1557_187	RGVC21107							1	MK
Roe_deer_Cecum-2__c1557_228	RGVC21107	K00943	dTMP kinase [EC:2.7.4.9] [RN:R02094]	MISC	Information systems	Nucleotide	Pyrimidine deoxyribonuleotide biosynthesis, CDP/CTP => dCDP/dCTP,dTDP/dTTP	1	M
Roe_deer_Cecum-2__c1557_232	RGVC21107	K21636	ribonucleoside-triphosphate reductase [EC:1.17.4.2 1.1.98.6] [RN:R02022 R11636]	MISC	Information systems	Nucleotide	Pyrimidine deoxyribonuleotide biosynthesis, CDP/CTP => dCDP/dCTP,dTDP/dTTP	2	MKE
Roe_deer_Cecum-2__c1557_233	RGVC21107	K01520	dUTP pyrophosphatase [EC:3.6.1.23] [RN:R02100]	MISC	Information systems	Nucleotide	Pyrimidine deoxyribonuleotide biosynthesis, CDP/CTP => dCDP/dCTP,dTDP/dTTP	2	M
Roe_deer_Cecum-2__c1557_24	RGVC21107							1	MK
Roe_deer_Cecum-2__c2070_163	RGVC21129	K00937	polyphosphate kinase ???	Energy	Oxygen		Cytochrome d ubiquinol oxidase	1	M
Roe_deer_Cecum-2__c2070_297	RGVC21129							1	MK
Roe_deer_Cecum-2__c2070_38	RGVC21129	K21636	ribonucleoside-triphosphate reductase [EC:1.17.4.2 1.1.98.6] [RN:R02022 R11636]	MISC	Information systems	Nucleotide	Pyrimidine deoxyribonuleotide biosynthesis, CDP/CTP => dCDP/dCTP,dTDP/dTTP	1	MKE
Roe_deer_Cecum-2__c2070_40	RGVC21129	K21636	ribonucleoside-triphosphate reductase [EC:1.17.4.2 1.1.98.6] [RN:R02022 R11636]	MISC	Information systems	Nucleotide	Pyrimidine deoxyribonuleotide biosynthesis, CDP/CTP => dCDP/dCTP,dTDP/dTTP	1	M
Roe_deer_Cecum-2__c2070_43	RGVC21129	K01520	dUTP pyrophosphatase [EC:3.6.1.23] [RN:R02100]	MISC	Information systems	Nucleotide	Pyrimidine deoxyribonuleotide biosynthesis, CDP/CTP => dCDP/dCTP,dTDP/dTTP	1	M
Roe_deer_Cecum-2__c2524_190	RGVC21164	K01520	dUTP pyrophosphatase [EC:3.6.1.23] [RN:R02100]	MISC	Information systems	Nucleotide	Pyrimidine deoxyribonuleotide biosynthesis, CDP/CTP => dCDP/dCTP,dTDP/dTTP	1	M
Roe_deer_Cecum-2__c2524_193	RGVC21164	K21636	ribonucleoside-triphosphate reductase [EC:1.17.4.2 1.1.98.6] [RN:R02022 R11636]	MISC	Information systems	Nucleotide	Pyrimidine deoxyribonuleotide biosynthesis, CDP/CTP => dCDP/dCTP,dTDP/dTTP	1	M
Roe_deer_Cecum-2__c2524_216	RGVC21164							1	MK
Roe_deer_Cecum-2__c2524_34	RGVC21164							1	MK
Roe_deer_Cecum-2__c2793_26	RGVC21176	K01520	dUTP pyrophosphatase [EC:3.6.1.23] [RN:R02100]	MISC	Information systems	Nucleotide	Pyrimidine deoxyribonuleotide biosynthesis, CDP/CTP => dCDP/dCTP,dTDP/dTTP	1	M
Roe_deer_Cecum-2__c2793_27	RGVC21176	K21636	ribonucleoside-triphosphate reductase [EC:1.17.4.2 1.1.98.6] [RN:R02022 R11636]	MISC	Information systems	Nucleotide	Pyrimidine deoxyribonuleotide biosynthesis, CDP/CTP => dCDP/dCTP,dTDP/dTTP	1	M
Roe_deer_Cecum-2__c532_145	RGVC21219	K21636	ribonucleoside-triphosphate reductase [EC:1.17.4.2 1.1.98.6] [RN:R02022 R11636]	MISC	Information systems	Nucleotide	Pyrimidine deoxyribonuleotide biosynthesis, CDP/CTP => dCDP/dCTP,dTDP/dTTP	2	M
Roe_deer_Cecum-2__c532_151	RGVC21219	K01520	dUTP pyrophosphatase [EC:3.6.1.23] [RN:R02100]	MISC	Information systems	Nucleotide	Pyrimidine deoxyribonuleotide biosynthesis, CDP/CTP => dCDP/dCTP,dTDP/dTTP	2	M
Roe_deer_Cecum-2__c532_58	RGVC21219							2	MK
Roe_deer_Cecum-2__c532_90	RGVC21219	K00789	S-adenosylmethionine synthetase [EC:2.5.1.6] [RN:R00177]	Organic Nitrogen	Amino Acid		Methionine degradation	2	M
Roe_deer_Cecum-2__c814_1_3	RGVC21249	K01520	dUTP pyrophosphatase [EC:3.6.1.23] [RN:R02100]	MISC	Information systems	Nucleotide	Pyrimidine deoxyribonuleotide biosynthesis, CDP/CTP => dCDP/dCTP,dTDP/dTTP	2	MF
Roe_deer_Cecum-3__c1478_177	RGVC21276	K01520	dUTP pyrophosphatase [EC:3.6.1.23] [RN:R02100]	MISC	Information systems	Nucleotide	Pyrimidine deoxyribonuleotide biosynthesis, CDP/CTP => dCDP/dCTP,dTDP/dTTP	2	M
Roe_deer_Cecum-3__c1478_179	RGVC21276	K21636	ribonucleoside-triphosphate reductase [EC:1.17.4.2 1.1.98.6] [RN:R02022 R11636]	MISC	Information systems	Nucleotide	Pyrimidine deoxyribonuleotide biosynthesis, CDP/CTP => dCDP/dCTP,dTDP/dTTP	2	MKE
Roe_deer_Cecum-3__c1478_181	RGVC21276	K01784	UDP-glucose 4-epimerase	carbon utilization (Woodcroft)	sugar utilization (woodcroft)	galactose degradation	Galactose metabolism	2	MK
Roe_deer_Cecum-3__c1478_182	RGVC21276	K01756	adenylosuccinate lyase [EC:4.3.2.2] [RN:R01083]	MISC	Information systems	Nucleotide	Adenine ribonucleotide biosynthesis, IMP => ADP,ATP	2	MK
Roe_deer_Cecum-3__c1492_1_20	RGVC21277	K01520	dUTP pyrophosphatase [EC:3.6.1.23] [RN:R02100]	MISC	Information systems	Nucleotide	Pyrimidine deoxyribonuleotide biosynthesis, CDP/CTP => dCDP/dCTP,dTDP/dTTP	2	M
Roe_deer_Cecum-3__c1492_1_231	RGVC21277							1	MK
Roe_deer_Cecum-3__c1492_1_25	RGVC21277	K21636	ribonucleoside-triphosphate reductase [EC:1.17.4.2 1.1.98.6] [RN:R02022 R11636]	MISC	Information systems	Nucleotide	Pyrimidine deoxyribonuleotide biosynthesis, CDP/CTP => dCDP/dCTP,dTDP/dTTP	2	M
Roe_deer_Cecum-3__c1492_1_27	RGVC21277	K21636	ribonucleoside-triphosphate reductase [EC:1.17.4.2 1.1.98.6] [RN:R02022 R11636]	MISC	Information systems	Nucleotide	Pyrimidine deoxyribonuleotide biosynthesis, CDP/CTP => dCDP/dCTP,dTDP/dTTP	2	M
Roe_deer_Cecum-3__c1492_1_28	RGVC21277							2	MKE
Roe_deer_Cecum-3__c1492_1_68	RGVC21277							1	MK
Roe_deer_Cecum-3__c1492_1_69	RGVC21277							1	MK
Roe_deer_Cecum-3__c1492_1_88	RGVC21277							1	MK
Roe_deer_Cecum-3__c2501_1_101	RGVC21321							1	MK
Roe_deer_Cecum-3__c2501_1_12	RGVC21321	K01520	dUTP pyrophosphatase [EC:3.6.1.23] [RN:R02100]	MISC	Information systems	Nucleotide	Pyrimidine deoxyribonuleotide biosynthesis, CDP/CTP => dCDP/dCTP,dTDP/dTTP	2	M
Roe_deer_Cecum-3__c436_166	RGVC21366							1	MK
Roe_deer_Cecum-3__c436_202	RGVC21366							1	MK
Roe_deer_Cecum-3__c436_204	RGVC21366	K21636	ribonucleoside-triphosphate reductase [EC:1.17.4.2 1.1.98.6] [RN:R02022 R11636]	MISC	Information systems	Nucleotide	Pyrimidine deoxyribonuleotide biosynthesis, CDP/CTP => dCDP/dCTP,dTDP/dTTP	1	MKE
Roe_deer_Cecum-3__c436_207	RGVC21366	K21636	ribonucleoside-triphosphate reductase [EC:1.17.4.2 1.1.98.6] [RN:R02022 R11636]	MISC	Information systems	Nucleotide	Pyrimidine deoxyribonuleotide biosynthesis, CDP/CTP => dCDP/dCTP,dTDP/dTTP	1	M
Roe_deer_Cecum-3__c436_214	RGVC21366	K01520	dUTP pyrophosphatase [EC:3.6.1.23] [RN:R02100]	MISC	Information systems	Nucleotide	Pyrimidine deoxyribonuleotide biosynthesis, CDP/CTP => dCDP/dCTP,dTDP/dTTP	1	M
Roe_deer_Cecum-4__c1702_71	RGVC21443							2	M
Roe_deer_Cecum-4__c238291_47	RGVC21467	K02990	small subunit ribosomal protein S6	MISC	Information systems		Ribosome, bacteria	2	M
Roe_deer_Cecum-4__c272_124	RGVC21488							1	MK
Roe_deer_Cecum-4__c272_125	RGVC21488	K00558	DNA (cytosine-5-)-methyltransferase [EC:2.1.1.37] [RN:R04858]	Organic Nitrogen	Amino Acid		Methionine degradation	1	M
Roe_deer_Cecum-4__c272_128	RGVC21488	K21636	ribonucleoside-triphosphate reductase [EC:1.17.4.2 1.1.98.6] [RN:R02022 R11636]	MISC	Information systems	Nucleotide	Pyrimidine deoxyribonuleotide biosynthesis, CDP/CTP => dCDP/dCTP,dTDP/dTTP	1	M
Roe_deer_Cecum-4__c272_134	RGVC21488	K01520	dUTP pyrophosphatase [EC:3.6.1.23] [RN:R02100]	MISC	Information systems	Nucleotide	Pyrimidine deoxyribonuleotide biosynthesis, CDP/CTP => dCDP/dCTP,dTDP/dTTP	1	M
Roe_deer_Cecum-4__c272_47	RGVC21488							1	MK
Roe_deer_Cecum-4__c272_62	RGVC21488							1	MK
Roe_deer_Cecum-4__c272_89	RGVC21488							1	MK
Roe_deer_Cecum-4__c272_99	RGVC21488							1	MK
Roe_deer_Cecum-4__c3434_139	RGVC21511							2	MK
Roe_deer_Cecum-4__c3434_30	RGVC21511							2	MK
Roe_deer_Cecum-4__c3434_31	RGVC21511	K21636	ribonucleoside-triphosphate reductase [EC:1.17.4.2 1.1.98.6] [RN:R02022 R11636]	MISC	Information systems	Nucleotide	Pyrimidine deoxyribonuleotide biosynthesis, CDP/CTP => dCDP/dCTP,dTDP/dTTP	2	MKE
Roe_deer_Cecum-4__c3434_37	RGVC21511	K01520	dUTP pyrophosphatase [EC:3.6.1.23] [RN:R02100]	MISC	Information systems	Nucleotide	Pyrimidine deoxyribonuleotide biosynthesis, CDP/CTP => dCDP/dCTP,dTDP/dTTP	2	M
Roe_deer_Cecum-4__c712_1_44	RGVC21544	K00789	S-adenosylmethionine synthetase [EC:2.5.1.6] [RN:R00177]	Organic Nitrogen	Amino Acid		Methionine degradation	2	M
Roe_deer_Cecum-4__c712_1_47	RGVC21544	K00558	DNA (cytosine-5-)-methyltransferase [EC:2.1.1.37] [RN:R04858]	Organic Nitrogen	Amino Acid		Methionine degradation	2	M
Roe_deer_Cecum-4__c98463_73	RGVC21557							2	MK
Roe_deer_Cecum-4__c98463_74	RGVC21557	K21636	ribonucleoside-triphosphate reductase [EC:1.17.4.2 1.1.98.6] [RN:R02022 R11636]	MISC	Information systems	Nucleotide	Pyrimidine deoxyribonuleotide biosynthesis, CDP/CTP => dCDP/dCTP,dTDP/dTTP	2	MKE
Roe_deer_Cecum-4__c98463_79	RGVC21557	K21636	ribonucleoside-triphosphate reductase [EC:1.17.4.2 1.1.98.6] [RN:R02022 R11636]	MISC	Information systems	Nucleotide	Pyrimidine deoxyribonuleotide biosynthesis, CDP/CTP => dCDP/dCTP,dTDP/dTTP	2	M
Roe_deer_Cecum-4__c98463_87	RGVC21557	K01520	dUTP pyrophosphatase [EC:3.6.1.23] [RN:R02100]	MISC	Information systems	Nucleotide	Pyrimidine deoxyribonuleotide biosynthesis, CDP/CTP => dCDP/dCTP,dTDP/dTTP	2	M
Roe_deer_Cecum-5__c2058_1_50	RGVC21581	K00558	DNA (cytosine-5-)-methyltransferase [EC:2.1.1.37] [RN:R04858]	Organic Nitrogen	Amino Acid		Methionine degradation	1	M
Roe_deer_Cecum-5__c2644_15	RGVC21606	K01520	dUTP pyrophosphatase [EC:3.6.1.23] [RN:R02100]	MISC	Information systems	Nucleotide	Pyrimidine deoxyribonuleotide biosynthesis, CDP/CTP => dCDP/dCTP,dTDP/dTTP	1	M
Roe_deer_Cecum-5__c2644_46	RGVC21606	K21636	ribonucleoside-triphosphate reductase [EC:1.17.4.2 1.1.98.6] [RN:R02022 R11636]	MISC	Information systems	Nucleotide	Pyrimidine deoxyribonuleotide biosynthesis, CDP/CTP => dCDP/dCTP,dTDP/dTTP	1	MKE
Roe_deer_Cecum-5__c2644_48	RGVC21606	K21636	ribonucleoside-triphosphate reductase [EC:1.17.4.2 1.1.98.6] [RN:R02022 R11636]	MISC	Information systems	Nucleotide	Pyrimidine deoxyribonuleotide biosynthesis, CDP/CTP => dCDP/dCTP,dTDP/dTTP	1	M
Roe_deer_Cecum-5__c2843_93	RGVC21610							1	MK
Roe_deer_Cecum-5__c2843_94	RGVC21610							1	MK
Roe_deer_Cecum-5__c297423_127	RGVC21614	K21636	ribonucleoside-triphosphate reductase [EC:1.17.4.2 1.1.98.6] [RN:R02022 R11636]	MISC	Information systems	Nucleotide	Pyrimidine deoxyribonuleotide biosynthesis, CDP/CTP => dCDP/dCTP,dTDP/dTTP	1	MKE
Roe_deer_Cecum-5__c297423_251	RGVC21614							2	MK
Roe_deer_Cecum-5__c297423_80	RGVC21614	K01520	dUTP pyrophosphatase [EC:3.6.1.23] [RN:R02100]	MISC	Information systems	Nucleotide	Pyrimidine deoxyribonuleotide biosynthesis, CDP/CTP => dCDP/dCTP,dTDP/dTTP	1	M
Roe_deer_Cecum-5__c4120_119	RGVC21641	K21636	ribonucleoside-triphosphate reductase [EC:1.17.4.2 1.1.98.6] [RN:R02022 R11636]	MISC	Information systems	Nucleotide	Pyrimidine deoxyribonuleotide biosynthesis, CDP/CTP => dCDP/dCTP,dTDP/dTTP	2	MKE
Roe_deer_Cecum-5__c4120_183	RGVC21641	K01520	dUTP pyrophosphatase [EC:3.6.1.23] [RN:R02100]	MISC	Information systems	Nucleotide	Pyrimidine deoxyribonuleotide biosynthesis, CDP/CTP => dCDP/dCTP,dTDP/dTTP	2	M
Roe_deer_Cecum-5__c4120_188	RGVC21641							2	MK
Roe_deer_Cecum-5__c4120_263	RGVC21641							2	MK
Roe_deer_Cecum-5__c4120_264	RGVC21641							2	MK
Roe_deer_Cecum-5__c6018_50	RGVC21705	K01520	dUTP pyrophosphatase [EC:3.6.1.23] [RN:R02100]	MISC	Information systems	Nucleotide	Pyrimidine deoxyribonuleotide biosynthesis, CDP/CTP => dCDP/dCTP,dTDP/dTTP	3	M
Roe_deer_Cecum-5__c96681_10	RGVC21724							2	MK
Roe_deer_Cecum-5__c96681_43	RGVC21724							2	MK
Roe_deer_Colon-2__c1159_39	RGVC21811	K00558	DNA (cytosine-5-)-methyltransferase [EC:2.1.1.37] [RN:R04858]	Organic Nitrogen	Amino Acid		Methionine degradation	2	M
Roe_deer_Colon-2__c1430_132	RGVC21816							2	MK
Roe_deer_Colon-2__c1430_151	RGVC21816	K02050	ABC.SN.P; sulfonate/nitrate/taurine transport system permease protein	Transporters			NitT/TauT family transport system	2	M
Roe_deer_Colon-2__c1430_23	RGVC21816	K21636	ribonucleoside-triphosphate reductase [EC:1.17.4.2 1.1.98.6] [RN:R02022 R11636]	MISC	Information systems	Nucleotide	Pyrimidine deoxyribonuleotide biosynthesis, CDP/CTP => dCDP/dCTP,dTDP/dTTP	2	MKE
Roe_deer_Colon-2__c1430_26	RGVC21816	K01520	dUTP pyrophosphatase [EC:3.6.1.23] [RN:R02100]	MISC	Information systems	Nucleotide	Pyrimidine deoxyribonuleotide biosynthesis, CDP/CTP => dCDP/dCTP,dTDP/dTTP	2	M
Roe_deer_Colon-2__c1837_159	RGVC21831							1	MK
Roe_deer_Colon-2__c1837_358	RGVC21831							1	MK
Roe_deer_Colon-2__c1837_66	RGVC21831	K01520	dUTP pyrophosphatase [EC:3.6.1.23] [RN:R02100]	MISC	Information systems	Nucleotide	Pyrimidine deoxyribonuleotide biosynthesis, CDP/CTP => dCDP/dCTP,dTDP/dTTP	1	M
Roe_deer_Colon-2__c1837_78	RGVC21831							1	MK
Roe_deer_Colon-2__c481_1_111	RGVC21866	K00558	DNA (cytosine-5-)-methyltransferase [EC:2.1.1.37] [RN:R04858]	Organic Nitrogen	Amino Acid		Methionine degradation	2	M
Roe_deer_Colon-2__c481_1_15	RGVC21866							1	MK
Roe_deer_Colon-2__c481_1_30	RGVC21866	K21636	ribonucleoside-triphosphate reductase [EC:1.17.4.2 1.1.98.6] [RN:R02022 R11636]	MISC	Information systems	Nucleotide	Pyrimidine deoxyribonuleotide biosynthesis, CDP/CTP => dCDP/dCTP,dTDP/dTTP	1	MKE
Roe_deer_Colon-2__c481_1_64	RGVC21866	K01520	dUTP pyrophosphatase [EC:3.6.1.23] [RN:R02100]	MISC	Information systems	Nucleotide	Pyrimidine deoxyribonuleotide biosynthesis, CDP/CTP => dCDP/dCTP,dTDP/dTTP	2	M
Roe_deer_Colon-2__c794_131	RGVC21889							2	MK
Roe_deer_Colon-2__c794_146	RGVC21889							2	MK
Roe_deer_Colon-2__c794_147	RGVC21889							2	MK
Roe_deer_Colon-2__c794_164	RGVC21889	K00560	thymidylate synthase [EC:2.1.1.45] [RN:R02101]	MISC	Information systems	Nucleotide	Pyrimidine deoxyribonuleotide biosynthesis, CDP/CTP => dCDP/dCTP,dTDP/dTTP	1	M
Roe_deer_Colon-2__c794_195	RGVC21889	K01520	dUTP pyrophosphatase [EC:3.6.1.23] [RN:R02100]	MISC	Information systems	Nucleotide	Pyrimidine deoxyribonuleotide biosynthesis, CDP/CTP => dCDP/dCTP,dTDP/dTTP	1	M
Roe_deer_Colon-3__c16789_12	RGVC21903	K00558	DNA (cytosine-5-)-methyltransferase [EC:2.1.1.37] [RN:R04858]	Organic Nitrogen	Amino Acid		Methionine degradation	3	M
Roe_deer_Colon-3__c16789_25	RGVC21903	K00558	DNA (cytosine-5-)-methyltransferase [EC:2.1.1.37] [RN:R04858]	Organic Nitrogen	Amino Acid		Methionine degradation	3	M
Roe_deer_Colon-3__c4990_60	RGVC21938	K01520	dUTP pyrophosphatase [EC:3.6.1.23] [RN:R02100]	MISC	Information systems	Nucleotide	Pyrimidine deoxyribonuleotide biosynthesis, CDP/CTP => dCDP/dCTP,dTDP/dTTP	2	M
Roe_deer_Colon-3__c4990_63	RGVC21938	K21636	ribonucleoside-triphosphate reductase [EC:1.17.4.2 1.1.98.6] [RN:R02022 R11636]	MISC	Information systems	Nucleotide	Pyrimidine deoxyribonuleotide biosynthesis, CDP/CTP => dCDP/dCTP,dTDP/dTTP	2	M
Roe_deer_Colon-4__c2841_303	RGVC21999	K01520	dUTP pyrophosphatase [EC:3.6.1.23] [RN:R02100]	MISC	Information systems	Nucleotide	Pyrimidine deoxyribonuleotide biosynthesis, CDP/CTP => dCDP/dCTP,dTDP/dTTP	2	M
Roe_deer_Colon-4__c2841_427	RGVC21999							2	MK
Roe_deer_Colon-4__c2841_441	RGVC21999							2	MK
Roe_deer_Colon-4__c2841_61	RGVC21999	K21636	ribonucleoside-triphosphate reductase [EC:1.17.4.2 1.1.98.6] [RN:R02022 R11636]	MISC	Information systems	Nucleotide	Pyrimidine deoxyribonuleotide biosynthesis, CDP/CTP => dCDP/dCTP,dTDP/dTTP	2	MKE
Roe_deer_Colon-4__c437941_19	RGVC22037	K00789	S-adenosylmethionine synthetase [EC:2.5.1.6] [RN:R00177]	Organic Nitrogen	Amino Acid		Methionine degradation	1	M
Roe_deer_Colon-5__c710_128	RGVC22146							2	MK
Roe_deer_Colon-5__c710_146	RGVC22146	K01520	dUTP pyrophosphatase [EC:3.6.1.23] [RN:R02100]	MISC	Information systems	Nucleotide	Pyrimidine deoxyribonuleotide biosynthesis, CDP/CTP => dCDP/dCTP,dTDP/dTTP	2	M
Roe_deer_Colon-5__c710_155	RGVC22146	K21636	ribonucleoside-triphosphate reductase [EC:1.17.4.2 1.1.98.6] [RN:R02022 R11636]	MISC	Information systems	Nucleotide	Pyrimidine deoxyribonuleotide biosynthesis, CDP/CTP => dCDP/dCTP,dTDP/dTTP	2	MKEF
Roe_deer_Colon-5__c710_156	RGVC22146							2	MKF
Roe_deer_Colon-5__c813_105	RGVC22148							2	MK
Roe_deer_Colon-5__c813_55	RGVC22148							2	MK
Roe_deer_Colon-5__c813_57	RGVC22148							2	MK
Roe_deer_Colon-5__c813_59	RGVC22148	K01520	dUTP pyrophosphatase [EC:3.6.1.23] [RN:R02100]	MISC	Information systems	Nucleotide	Pyrimidine deoxyribonuleotide biosynthesis, CDP/CTP => dCDP/dCTP,dTDP/dTTP	2	M
Roe_deer_Colon-5__c813_66	RGVC22148	K21636	ribonucleoside-triphosphate reductase [EC:1.17.4.2 1.1.98.6] [RN:R02022 R11636]	MISC	Information systems	Nucleotide	Pyrimidine deoxyribonuleotide biosynthesis, CDP/CTP => dCDP/dCTP,dTDP/dTTP	2	MKE
Roe_deer_Colon-5__c813_83	RGVC22148	K00558	DNA (cytosine-5-)-methyltransferase [EC:2.1.1.37] [RN:R04858]	Organic Nitrogen	Amino Acid		Methionine degradation	2	M
Roe_deer_Duodenum-2__c267328_14	RGVC22204	K00651	homoserine O-succinyltransferase [EC:2.3.1.46] [RN:R01777]	Organic Nitrogen	Amino Acid		Methionine biosynthesis, apartate => homoserine => methionine	2	M
Roe_deer_Duodenum-2__c267328_59	RGVC22204	K21636	ribonucleoside-triphosphate reductase [EC:1.17.4.2 1.1.98.6] [RN:R02022 R11636]	MISC	Information systems	Nucleotide	Pyrimidine deoxyribonuleotide biosynthesis, CDP/CTP => dCDP/dCTP,dTDP/dTTP	2	MKE
Roe_deer_Jejunum-1__c178731_1_39	RGVC22277	K00789	S-adenosylmethionine synthetase [EC:2.5.1.6] [RN:R00177]	Organic Nitrogen	Amino Acid		Methionine degradation	2	M
Roe_deer_Jejunum-1__c305_59	RGVC22314							1	MK
Roe_deer_Jejunum-1__c305_97	RGVC22314	K21636	ribonucleoside-triphosphate reductase [EC:1.17.4.2 1.1.98.6] [RN:R02022 R11636]	MISC	Information systems	Nucleotide	Pyrimidine deoxyribonuleotide biosynthesis, CDP/CTP => dCDP/dCTP,dTDP/dTTP	1	M
Roe_deer_Jejunum-1__c361_50	RGVC22328							1	MK
Roe_deer_Jejunum-1__c361_51	RGVC22328	K21636	ribonucleoside-triphosphate reductase [EC:1.17.4.2 1.1.98.6] [RN:R02022 R11636]	MISC	Information systems	Nucleotide	Pyrimidine deoxyribonuleotide biosynthesis, CDP/CTP => dCDP/dCTP,dTDP/dTTP	1	MKE
Roe_deer_Jejunum-1__c361_58	RGVC22328	K01520	dUTP pyrophosphatase [EC:3.6.1.23] [RN:R02100]	MISC	Information systems	Nucleotide	Pyrimidine deoxyribonuleotide biosynthesis, CDP/CTP => dCDP/dCTP,dTDP/dTTP	1	M
Roe_deer_Jejunum-1__c97224_77	RGVC22434	K01520	dUTP pyrophosphatase [EC:3.6.1.23] [RN:R02100]	MISC	Information systems	Nucleotide	Pyrimidine deoxyribonuleotide biosynthesis, CDP/CTP => dCDP/dCTP,dTDP/dTTP	2	M
Roe_deer_Jejunum-2__c273_115	RGVC22469	K00558	DNA (cytosine-5-)-methyltransferase [EC:2.1.1.37] [RN:R04858]	Organic Nitrogen	Amino Acid		Methionine degradation	1	M
Roe_deer_Jejunum-2__c273_52	RGVC22469							1	MK
Roe_deer_Jejunum-2__c735_1_16	RGVC22514							1	MK
Roe_deer_Jejunum-3__c1935_118	RGVC22563	K21636	ribonucleoside-triphosphate reductase [EC:1.17.4.2 1.1.98.6] [RN:R02022 R11636]	MISC	Information systems	Nucleotide	Pyrimidine deoxyribonuleotide biosynthesis, CDP/CTP => dCDP/dCTP,dTDP/dTTP	2	MF
Roe_deer_Omasum-2__c193637_15	RGVC22657	K00558	DNA (cytosine-5-)-methyltransferase [EC:2.1.1.37] [RN:R04858]	Organic Nitrogen	Amino Acid		Methionine degradation	2	M
Roe_deer_Omasum-2__c489_2	RGVC22699	K01520	dUTP pyrophosphatase [EC:3.6.1.23] [RN:R02100]	MISC	Information systems	Nucleotide	Pyrimidine deoxyribonuleotide biosynthesis, CDP/CTP => dCDP/dCTP,dTDP/dTTP	2	MF
Roe_deer_Omasum-2__c604_127	RGVC22701							2	MK
Roe_deer_Omasum-2__c604_44	RGVC22701							2	MK
Roe_deer_Omasum-2__c604_73	RGVC22701	K21636	ribonucleoside-triphosphate reductase [EC:1.17.4.2 1.1.98.6] [RN:R02022 R11636]	MISC	Information systems	Nucleotide	Pyrimidine deoxyribonuleotide biosynthesis, CDP/CTP => dCDP/dCTP,dTDP/dTTP	2	MKE
Roe_deer_Omasum-2__c604_77	RGVC22701							2	MK
Roe_deer_Omasum-2__c604_81	RGVC22701	K01520	dUTP pyrophosphatase [EC:3.6.1.23] [RN:R02100]	MISC	Information systems	Nucleotide	Pyrimidine deoxyribonuleotide biosynthesis, CDP/CTP => dCDP/dCTP,dTDP/dTTP	1	M
Roe_deer_Omasum-3__c1287_53	RGVC22724	K00558	DNA (cytosine-5-)-methyltransferase [EC:2.1.1.37] [RN:R04858]	Organic Nitrogen	Amino Acid		Methionine degradation	2	M
Roe_deer_Omasum-3__c626_30	RGVC22760	K01520	dUTP pyrophosphatase [EC:3.6.1.23] [RN:R02100]	MISC	Information systems	Nucleotide	Pyrimidine deoxyribonuleotide biosynthesis, CDP/CTP => dCDP/dCTP,dTDP/dTTP	1	M
Roe_deer_Omasum-3__c626_83	RGVC22760	K01520	dUTP pyrophosphatase [EC:3.6.1.23] [RN:R02100]	MISC	Information systems	Nucleotide	Pyrimidine deoxyribonuleotide biosynthesis, CDP/CTP => dCDP/dCTP,dTDP/dTTP	2	M
Roe_deer_Omasum-4__c3628_1_14	RGVC22803	K00558	DNA (cytosine-5-)-methyltransferase [EC:2.1.1.37] [RN:R04858]	Organic Nitrogen	Amino Acid		Methionine degradation	1	M
Roe_deer_Omasum-4__c3628_1_22	RGVC22803	K00789	S-adenosylmethionine synthetase [EC:2.5.1.6] [RN:R00177]	Organic Nitrogen	Amino Acid		Methionine degradation	1	M
Roe_deer_Rectum-1__c1144_122	RGVC22881							1	MK
Roe_deer_Rectum-1__c1525_105	RGVC22893							2	M
Roe_deer_Rectum-1__c1525_159	RGVC22893	K01520	dUTP pyrophosphatase [EC:3.6.1.23] [RN:R02100]	MISC	Information systems	Nucleotide	Pyrimidine deoxyribonuleotide biosynthesis, CDP/CTP => dCDP/dCTP,dTDP/dTTP	2	M
Roe_deer_Rectum-1__c1525_248	RGVC22893							2	MK
Roe_deer_Rectum-1__c1525_272	RGVC22893							2	MK
Roe_deer_Rectum-1__c1525_288	RGVC22893	K21636	ribonucleoside-triphosphate reductase [EC:1.17.4.2 1.1.98.6] [RN:R02022 R11636]	MISC	Information systems	Nucleotide	Pyrimidine deoxyribonuleotide biosynthesis, CDP/CTP => dCDP/dCTP,dTDP/dTTP	2	MKE
Roe_deer_Rectum-1__c1525_291	RGVC22893							2	MK
Roe_deer_Rectum-1__c2384_109	RGVC22912							1	MK
Roe_deer_Rectum-1__c2384_36	RGVC22912							2	MK
Roe_deer_Rectum-1__c702908_10	RGVC22977	K21636	ribonucleoside-triphosphate reductase [EC:1.17.4.2 1.1.98.6] [RN:R02022 R11636]	MISC	Information systems	Nucleotide	Pyrimidine deoxyribonuleotide biosynthesis, CDP/CTP => dCDP/dCTP,dTDP/dTTP	2	M
Roe_deer_Rectum-1__c702908_13	RGVC22977	K01520	dUTP pyrophosphatase [EC:3.6.1.23] [RN:R02100]	MISC	Information systems	Nucleotide	Pyrimidine deoxyribonuleotide biosynthesis, CDP/CTP => dCDP/dCTP,dTDP/dTTP	2	M
Roe_deer_Rectum-1__c702908_130	RGVC22977							2	MK
Roe_deer_Rectum-1__c702908_183	RGVC22977	K00789	S-adenosylmethionine synthetase [EC:2.5.1.6] [RN:R00177]	Organic Nitrogen	Amino Acid		Methionine degradation	2	M
Roe_deer_Rectum-2__c1363_20	RGVC23004	K00558	DNA (cytosine-5-)-methyltransferase [EC:2.1.1.37] [RN:R04858]	Organic Nitrogen	Amino Acid		Methionine degradation	2	M
Roe_deer_Rectum-3__c167_43	RGVC23150	K01494	dCTP deaminase [EC:3.5.4.13] [RN:R02325]	MISC	Information systems	Nucleotide	Pyrimidine deoxyribonuleotide biosynthesis, CDP/CTP => dCDP/dCTP,dTDP/dTTP	2	M
Roe_deer_Rectum-3__c167_82	RGVC23150	K00558	DNA (cytosine-5-)-methyltransferase [EC:2.1.1.37] [RN:R04858]	Organic Nitrogen	Amino Acid		Methionine degradation	2	M
Roe_deer_Rectum-3__c2446_44	RGVC23176	K01520	dUTP pyrophosphatase [EC:3.6.1.23] [RN:R02100]	MISC	Information systems	Nucleotide	Pyrimidine deoxyribonuleotide biosynthesis, CDP/CTP => dCDP/dCTP,dTDP/dTTP	1	M
Roe_deer_Rectum-3__c404_157	RGVC23200	K00558	DNA (cytosine-5-)-methyltransferase [EC:2.1.1.37] [RN:R04858]	Organic Nitrogen	Amino Acid		Methionine degradation	2	M
Roe_deer_Rectum-3__c634985_1_32	RGVC23230	K00558	DNA (cytosine-5-)-methyltransferase [EC:2.1.1.37] [RN:R04858]	Organic Nitrogen	Amino Acid		Methionine degradation	2	M
Roe_deer_Rectum-4__c150688_21	RGVC23271							2	M
Roe_deer_Rectum-4__c150688_22	RGVC23271							2	MK
Roe_deer_Rectum-4__c2033_225	RGVC23288							1	MK
Roe_deer_Rectum-4__c2033_241	RGVC23288							1	MK
Roe_deer_Rectum-4__c2033_73	RGVC23288							1	MK
Roe_deer_Rectum-4__c3556_15	RGVC23336							2	MK
Roe_deer_Rectum-4__c3556_198	RGVC23336							1	MK
Roe_deer_Rectum-4__c3556_251	RGVC23336							2	MKF
Roe_deer_Rectum-4__c3556_56	RGVC23336							2	MK
Roe_deer_Rectum-4__c3556_57	RGVC23336							2	MKE
Roe_deer_Rectum-4__c3556_60	RGVC23336	K21636	ribonucleoside-triphosphate reductase [EC:1.17.4.2 1.1.98.6] [RN:R02022 R11636]	MISC	Information systems	Nucleotide	Pyrimidine deoxyribonuleotide biosynthesis, CDP/CTP => dCDP/dCTP,dTDP/dTTP	2	M
Roe_deer_Rectum-4__c3556_62	RGVC23336	K00656	formate acetyltransferase (pyruvate-formate lyase )	carbon utilization	pyruvate metabolism		pyruvate metabolism	2	M
Roe_deer_Rectum-4__c403343_63	RGVC23364	K00558	DNA (cytosine-5-)-methyltransferase [EC:2.1.1.37] [RN:R04858]	Organic Nitrogen	Amino Acid		Methionine degradation	2	MF
Roe_deer_Rectum-4__c439244_40	RGVC23369	K00558	DNA (cytosine-5-)-methyltransferase [EC:2.1.1.37] [RN:R04858]	Organic Nitrogen	Amino Acid		Methionine degradation	2	M
Roe_deer_Rectum-4__c44024_19	RGVC23370	K01520	dUTP pyrophosphatase [EC:3.6.1.23] [RN:R02100]	MISC	Information systems	Nucleotide	Pyrimidine deoxyribonuleotide biosynthesis, CDP/CTP => dCDP/dCTP,dTDP/dTTP	2	M
Roe_deer_Rectum-4__c44024_21	RGVC23370	K21636	ribonucleoside-triphosphate reductase [EC:1.17.4.2 1.1.98.6] [RN:R02022 R11636]	MISC	Information systems	Nucleotide	Pyrimidine deoxyribonuleotide biosynthesis, CDP/CTP => dCDP/dCTP,dTDP/dTTP	2	MKE
Roe_deer_Rectum-4__c44024_40	RGVC23370							2	MK
Roe_deer_Rectum-4__c548882_9	RGVC23388	K00558	DNA (cytosine-5-)-methyltransferase [EC:2.1.1.37] [RN:R04858]	Organic Nitrogen	Amino Acid		Methionine degradation	2	M
Roe_deer_Rectum-4__c562610_45	RGVC23392	K00558	DNA (cytosine-5-)-methyltransferase [EC:2.1.1.37] [RN:R04858]	Organic Nitrogen	Amino Acid		Methionine degradation	2	M
Roe_deer_Rectum-4__c562610_47	RGVC23392	K00789	S-adenosylmethionine synthetase [EC:2.5.1.6] [RN:R00177]	Organic Nitrogen	Amino Acid		Methionine degradation	2	M
Roe_deer_Rectum-5__c133727_1_20	RGVC23419	K01520	dUTP pyrophosphatase [EC:3.6.1.23] [RN:R02100]	MISC	Information systems	Nucleotide	Pyrimidine deoxyribonuleotide biosynthesis, CDP/CTP => dCDP/dCTP,dTDP/dTTP	2	M
Roe_deer_Rectum-5__c133727_1_26	RGVC23419	K21636	ribonucleoside-triphosphate reductase [EC:1.17.4.2 1.1.98.6] [RN:R02022 R11636]	MISC	Information systems	Nucleotide	Pyrimidine deoxyribonuleotide biosynthesis, CDP/CTP => dCDP/dCTP,dTDP/dTTP	2	M
Roe_deer_Rectum-5__c1711_13	RGVC23428	K00558	DNA (cytosine-5-)-methyltransferase [EC:2.1.1.37] [RN:R04858]	Organic Nitrogen	Amino Acid		Methionine degradation	2	MF
Roe_deer_Rectum-5__c1711_81	RGVC23428	K00558	DNA (cytosine-5-)-methyltransferase [EC:2.1.1.37] [RN:R04858]	Organic Nitrogen	Amino Acid		Methionine degradation	1	M
Roe_deer_Rectum-5__c1960_62	RGVC23433							2	MK
Roe_deer_Reticulum-3__c216_1_43	RGVC23618	K01520	dUTP pyrophosphatase [EC:3.6.1.23] [RN:R02100]	MISC	Information systems	Nucleotide	Pyrimidine deoxyribonuleotide biosynthesis, CDP/CTP => dCDP/dCTP,dTDP/dTTP	2	M
Roe_deer_Reticulum-3__c64242_82	RGVC23637	K00558	DNA (cytosine-5-)-methyltransferase [EC:2.1.1.37] [RN:R04858]	Organic Nitrogen	Amino Acid		Methionine degradation	2	M
Roe_deer_Reticulum-4__c1243_166	RGVC23647							2	MK
Roe_deer_Reticulum-4__c1243_199	RGVC23647	K21636	ribonucleoside-triphosphate reductase [EC:1.17.4.2 1.1.98.6] [RN:R02022 R11636]	MISC	Information systems	Nucleotide	Pyrimidine deoxyribonuleotide biosynthesis, CDP/CTP => dCDP/dCTP,dTDP/dTTP	2	MKE
Roe_deer_Reticulum-4__c1243_201	RGVC23647	K01520	dUTP pyrophosphatase [EC:3.6.1.23] [RN:R02100]	MISC	Information systems	Nucleotide	Pyrimidine deoxyribonuleotide biosynthesis, CDP/CTP => dCDP/dCTP,dTDP/dTTP	2	M
Roe_deer_Reticulum-4__c1243_212	RGVC23647							2	MKF
Roe_deer_Reticulum-4__c1243_39	RGVC23647							2	MK
Roe_deer_Reticulum-4__c1243_72	RGVC23647	K21636	ribonucleoside-triphosphate reductase [EC:1.17.4.2 1.1.98.6] [RN:R02022 R11636]	MISC	Information systems	Nucleotide	Pyrimidine deoxyribonuleotide biosynthesis, CDP/CTP => dCDP/dCTP,dTDP/dTTP	2	MKE
Roe_deer_Reticulum-4__c1243_74	RGVC23647	K01520	dUTP pyrophosphatase [EC:3.6.1.23] [RN:R02100]	MISC	Information systems	Nucleotide	Pyrimidine deoxyribonuleotide biosynthesis, CDP/CTP => dCDP/dCTP,dTDP/dTTP	2	M
Roe_deer_Reticulum-4__c1243_85	RGVC23647							2	MK
Roe_deer_Reticulum-4__c151637_55	RGVC23656	K01520	dUTP pyrophosphatase [EC:3.6.1.23] [RN:R02100]	MISC	Information systems	Nucleotide	Pyrimidine deoxyribonuleotide biosynthesis, CDP/CTP => dCDP/dCTP,dTDP/dTTP	2	M
Roe_deer_Reticulum-4__c840_1_50	RGVC23683	K01520	dUTP pyrophosphatase [EC:3.6.1.23] [RN:R02100]	MISC	Information systems	Nucleotide	Pyrimidine deoxyribonuleotide biosynthesis, CDP/CTP => dCDP/dCTP,dTDP/dTTP	2	M
Roe_deer_Rumen-1__c12112_193	RGVC23751							2	MK
Roe_deer_Rumen-1__c12112_205	RGVC23751							2	MK
Roe_deer_Rumen-1__c12112_380	RGVC23751	K21636	ribonucleoside-triphosphate reductase [EC:1.17.4.2 1.1.98.6] [RN:R02022 R11636]	MISC	Information systems	Nucleotide	Pyrimidine deoxyribonuleotide biosynthesis, CDP/CTP => dCDP/dCTP,dTDP/dTTP	1	MKE
Roe_deer_Rumen-1__c12112_45	RGVC23751							2	MK
Roe_deer_Rumen-1__c12112_478	RGVC23751	K01520	dUTP pyrophosphatase [EC:3.6.1.23] [RN:R02100]	MISC	Information systems	Nucleotide	Pyrimidine deoxyribonuleotide biosynthesis, CDP/CTP => dCDP/dCTP,dTDP/dTTP	2	M
Roe_deer_Rumen-1__c13510_1_11	RGVC23760	K00558	DNA (cytosine-5-)-methyltransferase [EC:2.1.1.37] [RN:R04858]	Organic Nitrogen	Amino Acid		Methionine degradation	2	M
Roe_deer_Rumen-1__c13510_1_18	RGVC23760							2	MK
Roe_deer_Rumen-1__c224539_68	RGVC23779	K01520	dUTP pyrophosphatase [EC:3.6.1.23] [RN:R02100]	MISC	Information systems	Nucleotide	Pyrimidine deoxyribonuleotide biosynthesis, CDP/CTP => dCDP/dCTP,dTDP/dTTP	2	M
Roe_deer_Rumen-2__c3995_32	RGVC23925							2	MK
Roe_deer_Rumen-2__c5364_71	RGVC23958	K00558	DNA (cytosine-5-)-methyltransferase [EC:2.1.1.37] [RN:R04858]	Organic Nitrogen	Amino Acid		Methionine degradation	2	M
Roe_deer_Rumen-3__c3015_41	RGVC24044							1	MK
Roe_deer_Rumen-3__c3015_42	RGVC24044							1	MK
Roe_deer_Rumen-4__c1635_24	RGVC24111	K21636	ribonucleoside-triphosphate reductase [EC:1.17.4.2 1.1.98.6] [RN:R02022 R11636]	MISC	Information systems	Nucleotide	Pyrimidine deoxyribonuleotide biosynthesis, CDP/CTP => dCDP/dCTP,dTDP/dTTP	2	MKE
Roe_deer_Rumen-4__c1635_27	RGVC24111	K21636	ribonucleoside-triphosphate reductase [EC:1.17.4.2 1.1.98.6] [RN:R02022 R11636]	MISC	Information systems	Nucleotide	Pyrimidine deoxyribonuleotide biosynthesis, CDP/CTP => dCDP/dCTP,dTDP/dTTP	2	M
Roe_deer_Rumen-4__c1822_1_35	RGVC24115	K00789	S-adenosylmethionine synthetase [EC:2.5.1.6] [RN:R00177]	Organic Nitrogen	Amino Acid		Methionine degradation	2	M
Roe_deer_Rumen-4__c1822_1_39	RGVC24115	K01243	S-adenosylhomocysteine/5'-methylthioadenosine nucleosidase [EC:3.2.2.9] [RN:R00194]	Organic Nitrogen	Amino Acid		Cysteine biosynthesis, methionine => cysteine	2	MK
Roe_deer_Rumen-4__c2466_31	RGVC24138	K00789	S-adenosylmethionine synthetase [EC:2.5.1.6] [RN:R00177]	Organic Nitrogen	Amino Acid		Methionine degradation	2	M
Roe_deer_Rumen-4__c2466_36	RGVC24138	K00558	DNA (cytosine-5-)-methyltransferase [EC:2.1.1.37] [RN:R04858]	Organic Nitrogen	Amino Acid		Methionine degradation	2	M
Roe_deer_Rumen-4__c61519_21	RGVC24170							1	MK
Roe_deer_Rumen-4__c61519_34	RGVC24170							1	MK
Roe_deer_Rumen-5__c2595_10	RGVC24267							2	MK
Roe_deer_Rumen-5__c2947_60	RGVC24280	K01520	dUTP pyrophosphatase [EC:3.6.1.23] [RN:R02100]	MISC	Information systems	Nucleotide	Pyrimidine deoxyribonuleotide biosynthesis, CDP/CTP => dCDP/dCTP,dTDP/dTTP	2	M
Roe_deer_Rumen-5__c3017_11	RGVC24290							2	MK
Roe_deer_Rumen-5__c3017_182	RGVC24290							2	MK
Roe_deer_Rumen-5__c3017_58	RGVC24290							2	MK
Roe_deer_Rumen-5__c3017_59	RGVC24290	K21636	ribonucleoside-triphosphate reductase [EC:1.17.4.2 1.1.98.6] [RN:R02022 R11636]	MISC	Information systems	Nucleotide	Pyrimidine deoxyribonuleotide biosynthesis, CDP/CTP => dCDP/dCTP,dTDP/dTTP	2	MKE
Roe_deer_Rumen-5__c3017_68	RGVC24290	K01520	dUTP pyrophosphatase [EC:3.6.1.23] [RN:R02100]	MISC	Information systems	Nucleotide	Pyrimidine deoxyribonuleotide biosynthesis, CDP/CTP => dCDP/dCTP,dTDP/dTTP	2	M
Roe_deer_Rumen-5__c3017_71	RGVC24290							2	MK
Roe_deer_Rumen-5__c3130_82	RGVC24302	K00558	DNA (cytosine-5-)-methyltransferase [EC:2.1.1.37] [RN:R04858]	Organic Nitrogen	Amino Acid		Methionine degradation	1	M
Roe_deer_Rumen-5__c3226_1_83	RGVC24314	K00558	DNA (cytosine-5-)-methyltransferase [EC:2.1.1.37] [RN:R04858]	Organic Nitrogen	Amino Acid		Methionine degradation	1	M
Roe_deer_Rumen-5__c3268_161	RGVC24319	K01494	dCTP deaminase [EC:3.5.4.13] [RN:R02325]	MISC	Information systems	Nucleotide	Pyrimidine deoxyribonuleotide biosynthesis, CDP/CTP => dCDP/dCTP,dTDP/dTTP	2	MF
Roe_deer_Rumen-5__c3268_74	RGVC24319	K01494	dCTP deaminase [EC:3.5.4.13] [RN:R02325]	MISC	Information systems	Nucleotide	Pyrimidine deoxyribonuleotide biosynthesis, CDP/CTP => dCDP/dCTP,dTDP/dTTP	1	M
Roe_deer_Rumen-5__c3268_84	RGVC24319	K00558	DNA (cytosine-5-)-methyltransferase [EC:2.1.1.37] [RN:R04858]	Organic Nitrogen	Amino Acid		Methionine degradation	1	M
Roe_deer_Rumen-5__c341140_27	RGVC24339							1	MK
Roe_deer_Rumen-5__c407392_16	RGVC24379	K00558	DNA (cytosine-5-)-methyltransferase [EC:2.1.1.37] [RN:R04858]	Organic Nitrogen	Amino Acid		Methionine degradation	1	M
Roe_deer_Rumen-5__c4673_1_76	RGVC24401	K07173	S-ribosylhomocysteine lyase [EC:4.4.1.21] [RN:R01291]	Organic Nitrogen	Amino Acid		Cysteine biosynthesis, methionine => cysteine	2	M
Roe_deer_Rumen-5__c4673_1_81	RGVC24401	K01243	S-adenosylhomocysteine/5'-methylthioadenosine nucleosidase [EC:3.2.2.9] [RN:R00194]	Organic Nitrogen	Amino Acid		Cysteine biosynthesis, methionine => cysteine	2	MK
Roe_deer_Rumen-5__c468047_1_27	RGVC24402	K00558	DNA (cytosine-5-)-methyltransferase [EC:2.1.1.37] [RN:R04858]	Organic Nitrogen	Amino Acid		Methionine degradation	2	M
s1027.dairy-hifiasm001028c_183	RGVC24495							1	MK
s1027.dairy-hifiasm001028c_196	RGVC24495							1	MK
s1027.dairy-hifiasm001028c_26	RGVC24495	K01520	dUTP pyrophosphatase [EC:3.6.1.23] [RN:R02100]	MISC	Information systems	Nucleotide	Pyrimidine deoxyribonuleotide biosynthesis, CDP/CTP => dCDP/dCTP,dTDP/dTTP	1	M
s1027.dairy-hifiasm001028c_34	RGVC24495	K21636	ribonucleoside-triphosphate reductase [EC:1.17.4.2 1.1.98.6] [RN:R02022 R11636]	MISC	Information systems	Nucleotide	Pyrimidine deoxyribonuleotide biosynthesis, CDP/CTP => dCDP/dCTP,dTDP/dTTP	1	M
s1027.dairy-hifiasm001028c_36	RGVC24495							1	MK
s10762.dairy-hifiasm010763l_45	RGVC24548							2	MK
s10762.dairy-hifiasm010763l_77	RGVC24548							2	MK
s10762.dairy-hifiasm010763l_79	RGVC24548	K21636	ribonucleoside-triphosphate reductase [EC:1.17.4.2 1.1.98.6] [RN:R02022 R11636]	MISC	Information systems	Nucleotide	Pyrimidine deoxyribonuleotide biosynthesis, CDP/CTP => dCDP/dCTP,dTDP/dTTP	2	M
s10762.dairy-hifiasm010763l_84	RGVC24548	K01520	dUTP pyrophosphatase [EC:3.6.1.23] [RN:R02100]	MISC	Information systems	Nucleotide	Pyrimidine deoxyribonuleotide biosynthesis, CDP/CTP => dCDP/dCTP,dTDP/dTTP	2	M
s1093.goat-hifiasm001135l_31	RGVC24561							1	M
s11202.dairy-hifiasm011203l_217	RGVC24591	K04069	pyruvate formate lyase activating enzyme	carbon utilization	pyruvate metabolism		pyruvate metabolism	2	M
s11202.dairy-hifiasm011203l_218	RGVC24591	K21636	ribonucleoside-triphosphate reductase [EC:1.17.4.2 1.1.98.6] [RN:R02022 R11636]	MISC	Information systems	Nucleotide	Pyrimidine deoxyribonuleotide biosynthesis, CDP/CTP => dCDP/dCTP,dTDP/dTTP	2	MKE
s11323.goat-hifiasm011504l_20	RGVC24605							2	MK
s11915.dairy-hifiasm011916l_170	RGVC24659							1	MK
s12094.dairy-hifiasm012095l_152	RGVC24682							2	MK
s1369.goat-hifiasm001419l_37	RGVC24849	M95	Catlytic type: Metallo; member is abylysin (Pyrococcus abyssi)	Organic Nitrogen	Peptidase			2	M
s14192.dairy-hifiasm014193l_40	RGVC24901	K01494	dCTP deaminase [EC:3.5.4.13] [RN:R02325]	MISC	Information systems	Nucleotide	Pyrimidine deoxyribonuleotide biosynthesis, CDP/CTP => dCDP/dCTP,dTDP/dTTP	2	M
s1560.goat-hifiasm001615l_23	RGVC25050							2	MK
s1560.goat-hifiasm001615l_307	RGVC25050	K21636	ribonucleoside-triphosphate reductase [EC:1.17.4.2 1.1.98.6] [RN:R02022 R11636]	MISC	Information systems	Nucleotide	Pyrimidine deoxyribonuleotide biosynthesis, CDP/CTP => dCDP/dCTP,dTDP/dTTP	1	MKE
s1560.goat-hifiasm001615l_462	RGVC25050							2	MK
s15840.goat-hifiasm016057l_1_20	RGVC25074							1	MK
s15840.goat-hifiasm016057l_1_83	RGVC25074							1	MK
s1642.goat-hifiasm001699l_37	RGVC25127	K00558	DNA (cytosine-5-)-methyltransferase [EC:2.1.1.37] [RN:R04858]	Organic Nitrogen	Amino Acid		Methionine degradation	2	M
s17365.dairy-hifiasm017366l_96	RGVC25227	K01520	dUTP pyrophosphatase [EC:3.6.1.23] [RN:R02100]	MISC	Information systems	Nucleotide	Pyrimidine deoxyribonuleotide biosynthesis, CDP/CTP => dCDP/dCTP,dTDP/dTTP	1	M
s1902.dairy-hifiasm001903l_106	RGVC25364	K04516	chorismate mutase [EC:5.4.99.5] [RN:R01715]	Organic Nitrogen	Amino Acid		Tyrosine biosynthesis, chorismate => tyrosine	1	MK
s1902.dairy-hifiasm001903l_108	RGVC25364	K01735	3-dehydroquinate synthase [EC:4.2.3.4] [RN:R03083]	Organic Nitrogen	Amino Acid		Shikimate pathway, phosphoenolpyruvate + erythrose-4P => chorismate	1	MK
s1902.dairy-hifiasm001903l_113	RGVC25364	K01520	dUTP pyrophosphatase [EC:3.6.1.23] [RN:R02100]	MISC	Information systems	Nucleotide	Pyrimidine deoxyribonuleotide biosynthesis, CDP/CTP => dCDP/dCTP,dTDP/dTTP	1	M
s1902.dairy-hifiasm001903l_129	RGVC25364							1	MK
s1902.dairy-hifiasm001903l_166	RGVC25364							1	M
s1902.dairy-hifiasm001903l_191	RGVC25364							1	MKE
s1902.dairy-hifiasm001903l_230	RGVC25364							1	M
s1902.dairy-hifiasm001903l_32	RGVC25364	K21636	ribonucleoside-triphosphate reductase [EC:1.17.4.2 1.1.98.6] [RN:R02022 R11636]	MISC	Information systems	Nucleotide	Pyrimidine deoxyribonuleotide biosynthesis, CDP/CTP => dCDP/dCTP,dTDP/dTTP	1	MKE
s1902.dairy-hifiasm001903l_96	RGVC25364							1	MK
s1902.dairy-hifiasm001903l_98	RGVC25364	K00800	3-phosphoshikimate 1-carboxyvinyltransferase [EC:2.5.1.19] [RN:R03460]	Organic Nitrogen	Amino Acid		Shikimate pathway, phosphoenolpyruvate + erythrose-4P => chorismate	1	M
s1902.dairy-hifiasm001903l_99	RGVC25364	K03786	3-dehydroquinate dehydratase [EC:4.2.1.10] [RN:R03084]	Organic Nitrogen	Amino Acid		Shikimate pathway, phosphoenolpyruvate + erythrose-4P => chorismate	1	M
s19278.dairy-hifiasm019280l_58	RGVC25392	K21636	ribonucleoside-triphosphate reductase [EC:1.17.4.2 1.1.98.6] [RN:R02022 R11636]	MISC	Information systems	Nucleotide	Pyrimidine deoxyribonuleotide biosynthesis, CDP/CTP => dCDP/dCTP,dTDP/dTTP	3	MKE
s19278.dairy-hifiasm019280l_65	RGVC25392	K01520	dUTP pyrophosphatase [EC:3.6.1.23] [RN:R02100]	MISC	Information systems	Nucleotide	Pyrimidine deoxyribonuleotide biosynthesis, CDP/CTP => dCDP/dCTP,dTDP/dTTP	3	M
s1932.dairy-hifiasm001933l_169	RGVC25397							1	M
s20145.dairy-hifiasm020147l_152	RGVC25477							3	MK
s2079.goat-hifiasm002151c_1_34	RGVC25531	K21636	ribonucleoside-triphosphate reductase [EC:1.17.4.2 1.1.98.6] [RN:R02022 R11636]	MISC	Information systems	Nucleotide	Pyrimidine deoxyribonuleotide biosynthesis, CDP/CTP => dCDP/dCTP,dTDP/dTTP	2	MKE
s2079.goat-hifiasm002151c_1_35	RGVC25531	K21636	ribonucleoside-triphosphate reductase [EC:1.17.4.2 1.1.98.6] [RN:R02022 R11636]	MISC	Information systems	Nucleotide	Pyrimidine deoxyribonuleotide biosynthesis, CDP/CTP => dCDP/dCTP,dTDP/dTTP	2	M
s21795.dairy-hifiasm021797l_12	RGVC25628	K00789	S-adenosylmethionine synthetase [EC:2.5.1.6] [RN:R00177]	Organic Nitrogen	Amino Acid		Methionine degradation	1	M
s21795.dairy-hifiasm021797l_18	RGVC25628	K00558	DNA (cytosine-5-)-methyltransferase [EC:2.1.1.37] [RN:R04858]	Organic Nitrogen	Amino Acid		Methionine degradation	1	M
s21795.dairy-hifiasm021797l_44	RGVC25628							1	M
s22874.goat-hifiasm023147l_1_67	RGVC25728	K00558	DNA (cytosine-5-)-methyltransferase [EC:2.1.1.37] [RN:R04858]	Organic Nitrogen	Amino Acid		Methionine degradation	2	M
s22874.goat-hifiasm023147l_1_78	RGVC25728	K01520	dUTP pyrophosphatase [EC:3.6.1.23] [RN:R02100]	MISC	Information systems	Nucleotide	Pyrimidine deoxyribonuleotide biosynthesis, CDP/CTP => dCDP/dCTP,dTDP/dTTP	2	M
s23039.dairy-hifiasm023041l_65	RGVC25751	K01520	dUTP pyrophosphatase [EC:3.6.1.23] [RN:R02100]	MISC	Information systems	Nucleotide	Pyrimidine deoxyribonuleotide biosynthesis, CDP/CTP => dCDP/dCTP,dTDP/dTTP	2	M
s23879.goat-hifiasm024160l_1_39	RGVC25812	K00558	DNA (cytosine-5-)-methyltransferase [EC:2.1.1.37] [RN:R04858]	Organic Nitrogen	Amino Acid		Methionine degradation	2	M
s2454.dairy-hifiasm002455l_236	RGVC25869	C82A	Catlytic type: Cysteine; hydrolyse the L-Lys(3)-D-Ala(4) bonds of bacterial cell wall components; protein showed cell-wall cross-linking activity	Organic Nitrogen	Peptidase		Hydrolase (and transfer) bacterial cell wall peptides	1	M
s2454.dairy-hifiasm002455l_81	RGVC25869	K01520	dUTP pyrophosphatase [EC:3.6.1.23] [RN:R02100]	MISC	Information systems	Nucleotide	Pyrimidine deoxyribonuleotide biosynthesis, CDP/CTP => dCDP/dCTP,dTDP/dTTP	2	M
s24903.dairy-hifiasm024905l_33	RGVC25902	K01520	dUTP pyrophosphatase [EC:3.6.1.23] [RN:R02100]	MISC	Information systems	Nucleotide	Pyrimidine deoxyribonuleotide biosynthesis, CDP/CTP => dCDP/dCTP,dTDP/dTTP	1	M
s25205.dairy-hifiasm025207l_57	RGVC25929	K01520	dUTP pyrophosphatase [EC:3.6.1.23] [RN:R02100]	MISC	Information systems	Nucleotide	Pyrimidine deoxyribonuleotide biosynthesis, CDP/CTP => dCDP/dCTP,dTDP/dTTP	1	M
s2591.dairy-hifiasm002592l_134	RGVC25993							2	M
s2591.dairy-hifiasm002592l_160	RGVC25993	K21636	ribonucleoside-triphosphate reductase [EC:1.17.4.2 1.1.98.6] [RN:R02022 R11636]	MISC	Information systems	Nucleotide	Pyrimidine deoxyribonuleotide biosynthesis, CDP/CTP => dCDP/dCTP,dTDP/dTTP	1	MKE
s2591.dairy-hifiasm002592l_195	RGVC25993	K01520	dUTP pyrophosphatase [EC:3.6.1.23] [RN:R02100]	MISC	Information systems	Nucleotide	Pyrimidine deoxyribonuleotide biosynthesis, CDP/CTP => dCDP/dCTP,dTDP/dTTP	2	M
s30151.goat-hifiasm030486l_77	RGVC26337							1	MK
s30413.dairy-hifiasm030416l_1_18	RGVC26359							1	MK
s3097.goat-hifiasm003191c_18	RGVC26401	K01520	dUTP pyrophosphatase [EC:3.6.1.23] [RN:R02100]	MISC	Information systems	Nucleotide	Pyrimidine deoxyribonuleotide biosynthesis, CDP/CTP => dCDP/dCTP,dTDP/dTTP	1	M
s3097.goat-hifiasm003191c_25	RGVC26401	K21636	ribonucleoside-triphosphate reductase [EC:1.17.4.2 1.1.98.6] [RN:R02022 R11636]	MISC	Information systems	Nucleotide	Pyrimidine deoxyribonuleotide biosynthesis, CDP/CTP => dCDP/dCTP,dTDP/dTTP	1	M
s3097.goat-hifiasm003191c_26	RGVC26401	K21636	ribonucleoside-triphosphate reductase [EC:1.17.4.2 1.1.98.6] [RN:R02022 R11636]	MISC	Information systems	Nucleotide	Pyrimidine deoxyribonuleotide biosynthesis, CDP/CTP => dCDP/dCTP,dTDP/dTTP	1	MKE
s3097.goat-hifiasm003191c_61	RGVC26401							1	MK
s31119.dairy-hifiasm031122l_3	RGVC26414							2	MKF
s31243.dairy-hifiasm031246l_56	RGVC26428							2	MK
s32141.dairy-hifiasm032144l_12	RGVC26510							2	MK
s32363.dairy-hifiasm032366l_72	RGVC26532	K00558	DNA (cytosine-5-)-methyltransferase [EC:2.1.1.37] [RN:R04858]	Organic Nitrogen	Amino Acid		Methionine degradation	2	MF
s3386.goat-hifiasm003482l_6	RGVC26648	K01520	dUTP pyrophosphatase [EC:3.6.1.23] [RN:R02100]	MISC	Information systems	Nucleotide	Pyrimidine deoxyribonuleotide biosynthesis, CDP/CTP => dCDP/dCTP,dTDP/dTTP	2	M
s3386.goat-hifiasm003482l_9	RGVC26648	K21636	ribonucleoside-triphosphate reductase [EC:1.17.4.2 1.1.98.6] [RN:R02022 R11636]	MISC	Information systems	Nucleotide	Pyrimidine deoxyribonuleotide biosynthesis, CDP/CTP => dCDP/dCTP,dTDP/dTTP	2	M
s3465.dairy-hifiasm003466l_148	RGVC26720							2	MK
s3465.dairy-hifiasm003466l_35	RGVC26720	K01520	dUTP pyrophosphatase [EC:3.6.1.23] [RN:R02100]	MISC	Information systems	Nucleotide	Pyrimidine deoxyribonuleotide biosynthesis, CDP/CTP => dCDP/dCTP,dTDP/dTTP	2	M
s3465.dairy-hifiasm003466l_406	RGVC26720							1	MK
s3465.dairy-hifiasm003466l_481	RGVC26720	K21636	ribonucleoside-triphosphate reductase [EC:1.17.4.2 1.1.98.6] [RN:R02022 R11636]	MISC	Information systems	Nucleotide	Pyrimidine deoxyribonuleotide biosynthesis, CDP/CTP => dCDP/dCTP,dTDP/dTTP	1	MKE
s36335.dairy-hifiasm036339l_51	RGVC26868	K01520	dUTP pyrophosphatase [EC:3.6.1.23] [RN:R02100]	MISC	Information systems	Nucleotide	Pyrimidine deoxyribonuleotide biosynthesis, CDP/CTP => dCDP/dCTP,dTDP/dTTP	1	M
s36335.dairy-hifiasm036339l_54	RGVC26868	K21636	ribonucleoside-triphosphate reductase [EC:1.17.4.2 1.1.98.6] [RN:R02022 R11636]	MISC	Information systems	Nucleotide	Pyrimidine deoxyribonuleotide biosynthesis, CDP/CTP => dCDP/dCTP,dTDP/dTTP	1	MKE
s36820.dairy-hifiasm036824l_22	RGVC26905							1	MK
s36820.dairy-hifiasm036824l_24	RGVC26905							1	M
s36820.dairy-hifiasm036824l_64	RGVC26905	K00558	DNA (cytosine-5-)-methyltransferase [EC:2.1.1.37] [RN:R04858]	Organic Nitrogen	Amino Acid		Methionine degradation	2	M
s3995.goat-hifiasm004099l_1_51	RGVC27123	K00558	DNA (cytosine-5-)-methyltransferase [EC:2.1.1.37] [RN:R04858]	Organic Nitrogen	Amino Acid		Methionine degradation	2	M
s41532.dairy-hifiasm041537l_17	RGVC27241							2	MK
s41583.dairy-hifiasm041588l_10	RGVC27244							2	M
s4362.dairy-hifiasm004363l_119	RGVC27377	K21636	ribonucleoside-triphosphate reductase [EC:1.17.4.2 1.1.98.6] [RN:R02022 R11636]	MISC	Information systems	Nucleotide	Pyrimidine deoxyribonuleotide biosynthesis, CDP/CTP => dCDP/dCTP,dTDP/dTTP	2	MKE
s4362.dairy-hifiasm004363l_123	RGVC27377	K01520	dUTP pyrophosphatase [EC:3.6.1.23] [RN:R02100]	MISC	Information systems	Nucleotide	Pyrimidine deoxyribonuleotide biosynthesis, CDP/CTP => dCDP/dCTP,dTDP/dTTP	2	M
s4449.goat-hifiasm004557c_47	RGVC27428	K01520	dUTP pyrophosphatase [EC:3.6.1.23] [RN:R02100]	MISC	Information systems	Nucleotide	Pyrimidine deoxyribonuleotide biosynthesis, CDP/CTP => dCDP/dCTP,dTDP/dTTP	1	M
s44759.dairy-hifiasm044764l_35	RGVC27448							1	MK
s473.goat-hifiasm000489l_1_40	RGVC27623	K01520	dUTP pyrophosphatase [EC:3.6.1.23] [RN:R02100]	MISC	Information systems	Nucleotide	Pyrimidine deoxyribonuleotide biosynthesis, CDP/CTP => dCDP/dCTP,dTDP/dTTP	2	M
s4816.goat-hifiasm004931l_1_32	RGVC27688	K01520	dUTP pyrophosphatase [EC:3.6.1.23] [RN:R02100]	MISC	Information systems	Nucleotide	Pyrimidine deoxyribonuleotide biosynthesis, CDP/CTP => dCDP/dCTP,dTDP/dTTP	2	M
s49781.dairy-hifiasm049786l_68	RGVC27785							2	MK
s5194.dairy-hifiasm005195l_196	RGVC27916							1	MK
s5194.dairy-hifiasm005195l_27	RGVC27916	K21636	ribonucleoside-triphosphate reductase [EC:1.17.4.2 1.1.98.6] [RN:R02022 R11636]	MISC	Information systems	Nucleotide	Pyrimidine deoxyribonuleotide biosynthesis, CDP/CTP => dCDP/dCTP,dTDP/dTTP	2	MKE
s5194.dairy-hifiasm005195l_86	RGVC27916							1	MK
s5414.dairy-hifiasm005415l_98	RGVC28046	K00558	DNA (cytosine-5-)-methyltransferase [EC:2.1.1.37] [RN:R04858]	Organic Nitrogen	Amino Acid		Methionine degradation	1	M
s54389.dairy-hifiasm054394l_7	RGVC28060							2	MF
s5510.goat-hifiasm005630l_36	RGVC28097							2	M
s5510.goat-hifiasm005630l_38	RGVC28097	K21636	ribonucleoside-triphosphate reductase [EC:1.17.4.2 1.1.98.6] [RN:R02022 R11636]	MISC	Information systems	Nucleotide	Pyrimidine deoxyribonuleotide biosynthesis, CDP/CTP => dCDP/dCTP,dTDP/dTTP	2	MKE
s5510.goat-hifiasm005630l_55	RGVC28097							1	MK
s55751.dairy-hifiasm055756l_18	RGVC28130	K00789	S-adenosylmethionine synthetase [EC:2.5.1.6] [RN:R00177]	Organic Nitrogen	Amino Acid		Methionine degradation	2	M
s5691.goat-hifiasm005812c_102	RGVC28191	K00789	S-adenosylmethionine synthetase [EC:2.5.1.6] [RN:R00177]	Organic Nitrogen	Amino Acid		Methionine degradation	2	M
s5691.goat-hifiasm005812c_144	RGVC28191							2	MK
s5691.goat-hifiasm005812c_71	RGVC28191	K01520	dUTP pyrophosphatase [EC:3.6.1.23] [RN:R02100]	MISC	Information systems	Nucleotide	Pyrimidine deoxyribonuleotide biosynthesis, CDP/CTP => dCDP/dCTP,dTDP/dTTP	2	M
s5691.goat-hifiasm005812c_75	RGVC28191	K21636	ribonucleoside-triphosphate reductase [EC:1.17.4.2 1.1.98.6] [RN:R02022 R11636]	MISC	Information systems	Nucleotide	Pyrimidine deoxyribonuleotide biosynthesis, CDP/CTP => dCDP/dCTP,dTDP/dTTP	2	MKE
s5691.goat-hifiasm005812c_76	RGVC28191							2	MK
s57125.dairy-hifiasm057130l_22	RGVC28208	K00558	DNA (cytosine-5-)-methyltransferase [EC:2.1.1.37] [RN:R04858]	Organic Nitrogen	Amino Acid		Methionine degradation	2	M
s635.dairy-hifiasm000636l_109	RGVC28561							3	MK
s635.dairy-hifiasm000636l_143	RGVC28561							3	MK
s635.dairy-hifiasm000636l_256	RGVC28561	K01458	N-formylglutamate deformylase [EC:3.5.1.68] [RN:R00525]	Organic Nitrogen	Amino Acid		Histidine degradation, histidine => N-formiminoglutamate => glutamate	3	MK
s63594.dairy-hifiasm063600c_3	RGVC28566	K00789	S-adenosylmethionine synthetase [EC:2.5.1.6] [RN:R00177]	Organic Nitrogen	Amino Acid		Methionine degradation	2	MF
s64598.dairy-hifiasm064606l_50	RGVC28618	K01520	dUTP pyrophosphatase [EC:3.6.1.23] [RN:R02100]	MISC	Information systems	Nucleotide	Pyrimidine deoxyribonuleotide biosynthesis, CDP/CTP => dCDP/dCTP,dTDP/dTTP	2	M
s69345.dairy-hifiasm069356l_15	RGVC28862	K00789	S-adenosylmethionine synthetase [EC:2.5.1.6] [RN:R00177]	Organic Nitrogen	Amino Acid		Methionine degradation	2	M
s70990.dairy-hifiasm071001c_47	RGVC28963							1	MK
s75192.dairy-hifiasm075204l_29	RGVC29138							2	MK
s75192.dairy-hifiasm075204l_42	RGVC29138	K01520	dUTP pyrophosphatase [EC:3.6.1.23] [RN:R02100]	MISC	Information systems	Nucleotide	Pyrimidine deoxyribonuleotide biosynthesis, CDP/CTP => dCDP/dCTP,dTDP/dTTP	2	MF
s76266.dairy-hifiasm076278l_18	RGVC29180	M06	Catlytic type: Metallo; digesting two classes of antibacterial humoral factors: cecropins and attacins, with no specific cleaving pattern; may contribute to the virulence of Bacillus thuringiensis	Organic Nitrogen	Peptidase		Metalloendopeptidases	1	M
s79.goat-hifiasm000080l_47	RGVC29312							1	MK
s79.goat-hifiasm000080l_56	RGVC29312	K00281	glycine cleavage system [RN:R01221]	Energy	Photosynthesis		Photorespiration	1	MK
s79.goat-hifiasm000080l_58	RGVC29312							1	MK
s79.goat-hifiasm000080l_71	RGVC29312							1	MK
s79.goat-hifiasm000080l_72	RGVC29312	K00012	UDPglucose 6-dehydrogenase [EC:1.1.1.22] [RN:R00286]	MISC	MISC		Glucuronate pathway (uronate pathway)	1	MK
s790.dairy-hifiasm000791c_22	RGVC29313	K21636	ribonucleoside-triphosphate reductase [EC:1.17.4.2 1.1.98.6] [RN:R02022 R11636]	MISC	Information systems	Nucleotide	Pyrimidine deoxyribonuleotide biosynthesis, CDP/CTP => dCDP/dCTP,dTDP/dTTP	2	MKE
s790.dairy-hifiasm000791c_25	RGVC29313	K01520	dUTP pyrophosphatase [EC:3.6.1.23] [RN:R02100]	MISC	Information systems	Nucleotide	Pyrimidine deoxyribonuleotide biosynthesis, CDP/CTP => dCDP/dCTP,dTDP/dTTP	2	M
s7942.dairy-hifiasm007943l_38	RGVC29330							2	MK
s8349.dairy-hifiasm008350l_15	RGVC29520							2	MK
s9114.goat-hifiasm009273l_32	RGVC29874							2	MK
s9625.goat-hifiasm009789l_48	RGVC30057							1	MK
s9848.goat-hifiasm010018l_52	RGVC30142							2	MK
s988.goat-hifiasm001028l_1_36	RGVC30151	K00789	S-adenosylmethionine synthetase [EC:2.5.1.6] [RN:R00177]	Organic Nitrogen	Amino Acid		Methionine degradation	1	M
s991.goat-hifiasm001031c_1_32	RGVC30163	K00558	DNA (cytosine-5-)-methyltransferase [EC:2.1.1.37] [RN:R04858]	Organic Nitrogen	Amino Acid		Methionine degradation	1	M
s991.goat-hifiasm001031c_1_33	RGVC30163	K00558	DNA (cytosine-5-)-methyltransferase [EC:2.1.1.37] [RN:R04858]	Organic Nitrogen	Amino Acid		Methionine degradation	1	M
Sheep_Abomasum-2__c185_263	RGVC30257	C82A	Catlytic type: Cysteine; hydrolyse the L-Lys(3)-D-Ala(4) bonds of bacterial cell wall components; protein showed cell-wall cross-linking activity	Organic Nitrogen	Peptidase		Hydrolase (and transfer) bacterial cell wall peptides	2	M
Sheep_Abomasum-2__c185_29	RGVC30257							2	MK
Sheep_Abomasum-2__c185_58	RGVC30257	K21636	ribonucleoside-triphosphate reductase [EC:1.17.4.2 1.1.98.6] [RN:R02022 R11636]	MISC	Information systems	Nucleotide	Pyrimidine deoxyribonuleotide biosynthesis, CDP/CTP => dCDP/dCTP,dTDP/dTTP	1	M
Sheep_Abomasum-2__c185_83	RGVC30257	K01520	dUTP pyrophosphatase [EC:3.6.1.23] [RN:R02100]	MISC	Information systems	Nucleotide	Pyrimidine deoxyribonuleotide biosynthesis, CDP/CTP => dCDP/dCTP,dTDP/dTTP	1	M
Sheep_Abomasum-2__c224138_21	RGVC30264	K01520	dUTP pyrophosphatase [EC:3.6.1.23] [RN:R02100]	MISC	Information systems	Nucleotide	Pyrimidine deoxyribonuleotide biosynthesis, CDP/CTP => dCDP/dCTP,dTDP/dTTP	1	M
Sheep_Abomasum-2__c224138_25	RGVC30264	K21636	ribonucleoside-triphosphate reductase [EC:1.17.4.2 1.1.98.6] [RN:R02022 R11636]	MISC	Information systems	Nucleotide	Pyrimidine deoxyribonuleotide biosynthesis, CDP/CTP => dCDP/dCTP,dTDP/dTTP	1	MKE
Sheep_Abomasum-2__c337526_75	RGVC30275							2	MK
Sheep_Abomasum-2__c478_118	RGVC30288							1	MK
Sheep_Abomasum-2__c478_231	RGVC30288							1	M
Sheep_Abomasum-2__c478_259	RGVC30288							1	MK
Sheep_Abomasum-2__c478_276	RGVC30288	K01520	dUTP pyrophosphatase [EC:3.6.1.23] [RN:R02100]	MISC	Information systems	Nucleotide	Pyrimidine deoxyribonuleotide biosynthesis, CDP/CTP => dCDP/dCTP,dTDP/dTTP	1	M
Sheep_Abomasum-2__c478_290	RGVC30288	K21636	ribonucleoside-triphosphate reductase [EC:1.17.4.2 1.1.98.6] [RN:R02022 R11636]	MISC	Information systems	Nucleotide	Pyrimidine deoxyribonuleotide biosynthesis, CDP/CTP => dCDP/dCTP,dTDP/dTTP	1	M
Sheep_Abomasum-4__c130047_29	RGVC30319							1	MK
Sheep_Abomasum-4__c54540_77	RGVC30374	K01494	dCTP deaminase [EC:3.5.4.13] [RN:R02325]	MISC	Information systems	Nucleotide	Pyrimidine deoxyribonuleotide biosynthesis, CDP/CTP => dCDP/dCTP,dTDP/dTTP	2	M
Sheep_Abomasum-4__c84_127	RGVC30404							1	MK
Sheep_Abomasum-4__c84_129	RGVC30404	K01939	adenylosuccinate synthase [EC:6.3.4.4] [RN:R01135]	MISC	Information systems	Nucleotide	Adenine ribonucleotide biosynthesis, IMP => ADP,ATP	1	M
Sheep_Abomasum-4__c84_139	RGVC30404							1	MK
Sheep_Abomasum-4__c84_168	RGVC30404	K21636	ribonucleoside-triphosphate reductase [EC:1.17.4.2 1.1.98.6] [RN:R02022 R11636]	MISC	Information systems	Nucleotide	Pyrimidine deoxyribonuleotide biosynthesis, CDP/CTP => dCDP/dCTP,dTDP/dTTP	1	M
Sheep_Abomasum-4__c84_325	RGVC30404							1	MK
Sheep_Abomasum-4__c84_64	RGVC30404							2	MK
Sheep_Cecum-3__c430770_45	RGVC30544	K00789	S-adenosylmethionine synthetase [EC:2.5.1.6] [RN:R00177]	Organic Nitrogen	Amino Acid		Methionine degradation	1	MF
Sheep_Cecum-3__c671044_1_10	RGVC30559	K00558	DNA (cytosine-5-)-methyltransferase [EC:2.1.1.37] [RN:R04858]	Organic Nitrogen	Amino Acid		Methionine degradation	1	M
Sheep_Colon-1__c146082_1_24	RGVC30587	K00558	DNA (cytosine-5-)-methyltransferase [EC:2.1.1.37] [RN:R04858]	Organic Nitrogen	Amino Acid		Methionine degradation	2	M
Sheep_Colon-1__c403_1_57	RGVC30615	K00558	DNA (cytosine-5-)-methyltransferase [EC:2.1.1.37] [RN:R04858]	Organic Nitrogen	Amino Acid		Methionine degradation	1	M
Sheep_Colon-3__c1653_1_14	RGVC30753	K00558	DNA (cytosine-5-)-methyltransferase [EC:2.1.1.37] [RN:R04858]	Organic Nitrogen	Amino Acid		Methionine degradation	2	M
Sheep_Colon-3__c622729_18	RGVC30794							1	M
Sheep_Colon-3__c622729_41	RGVC30794	K01520	dUTP pyrophosphatase [EC:3.6.1.23] [RN:R02100]	MISC	Information systems	Nucleotide	Pyrimidine deoxyribonuleotide biosynthesis, CDP/CTP => dCDP/dCTP,dTDP/dTTP	1	M
Sheep_Colon-3__c622729_51	RGVC30794							2	MK
Sheep_Colon-4__c423281_22	RGVC30849	K01520	dUTP pyrophosphatase [EC:3.6.1.23] [RN:R02100]	MISC	Information systems	Nucleotide	Pyrimidine deoxyribonuleotide biosynthesis, CDP/CTP => dCDP/dCTP,dTDP/dTTP	2	M
Sheep_Colon-4__c423281_28	RGVC30849	K21636	ribonucleoside-triphosphate reductase [EC:1.17.4.2 1.1.98.6] [RN:R02022 R11636]	MISC	Information systems	Nucleotide	Pyrimidine deoxyribonuleotide biosynthesis, CDP/CTP => dCDP/dCTP,dTDP/dTTP	2	M
Sheep_Colon-4__c423281_30	RGVC30849							2	MK
Sheep_Colon-4__c423281_70	RGVC30849							2	MK
Sheep_Colon-4__c423281_91	RGVC30849							2	MK
Sheep_Colon-5__c384934_1_9	RGVC30900	K00789	S-adenosylmethionine synthetase [EC:2.5.1.6] [RN:R00177]	Organic Nitrogen	Amino Acid		Methionine degradation	2	M
Sheep_Colon-5__c44843_3	RGVC30902	K00286	pyrroline-5-carboxylate reductase [EC:1.5.1.2] [RN:R01251]	Organic Nitrogen	Amino Acid		Proline biosynthesis, glutamate => proline	2	MF
Sheep_Duodenum-1__c30755_18	RGVC30957	K01520	dUTP pyrophosphatase [EC:3.6.1.23] [RN:R02100]	MISC	Information systems	Nucleotide	Pyrimidine deoxyribonuleotide biosynthesis, CDP/CTP => dCDP/dCTP,dTDP/dTTP	2	M
Sheep_Duodenum-3__c655965_20	RGVC31286	K00558	DNA (cytosine-5-)-methyltransferase [EC:2.1.1.37] [RN:R04858]	Organic Nitrogen	Amino Acid		Methionine degradation	2	M
Sheep_Duodenum-3__c655965_23	RGVC31286	K01494	dCTP deaminase [EC:3.5.4.13] [RN:R02325]	MISC	Information systems	Nucleotide	Pyrimidine deoxyribonuleotide biosynthesis, CDP/CTP => dCDP/dCTP,dTDP/dTTP	2	M
Sheep_Duodenum-5__c186936_24	RGVC31568	K00558	DNA (cytosine-5-)-methyltransferase [EC:2.1.1.37] [RN:R04858]	Organic Nitrogen	Amino Acid		Methionine degradation	1	M
Sheep_Duodenum-5__c186936_66	RGVC31568							2	MK
Sheep_Ileum-1__c237686_4	RGVC31763							2	MF
Sheep_Ileum-4__c15836_52	RGVC31938	K01520	dUTP pyrophosphatase [EC:3.6.1.23] [RN:R02100]	MISC	Information systems	Nucleotide	Pyrimidine deoxyribonuleotide biosynthesis, CDP/CTP => dCDP/dCTP,dTDP/dTTP	2	MF
Sheep_Jejunum-2__c179066_16	RGVC32394	K00558	DNA (cytosine-5-)-methyltransferase [EC:2.1.1.37] [RN:R04858]	Organic Nitrogen	Amino Acid		Methionine degradation	2	M
Sheep_Jejunum-2__c179066_83	RGVC32394							1	MK
Sheep_Jejunum-2__c330119_1_24	RGVC32461	K00558	DNA (cytosine-5-)-methyltransferase [EC:2.1.1.37] [RN:R04858]	Organic Nitrogen	Amino Acid		Methionine degradation	2	M
Sheep_Jejunum-2__c330119_1_36	RGVC32461	K01520	dUTP pyrophosphatase [EC:3.6.1.23] [RN:R02100]	MISC	Information systems	Nucleotide	Pyrimidine deoxyribonuleotide biosynthesis, CDP/CTP => dCDP/dCTP,dTDP/dTTP	2	M
Sheep_Jejunum-2__c390_47	RGVC32476							1	M
Sheep_Jejunum-4__c56588_25	RGVC32635	K00558	DNA (cytosine-5-)-methyltransferase [EC:2.1.1.37] [RN:R04858]	Organic Nitrogen	Amino Acid		Methionine degradation	2	M
Sheep_Omasum-1__c499_124	RGVC32735							2	M
Sheep_Omasum-1__c499_184	RGVC32735							1	MK
Sheep_Omasum-1__c499_254	RGVC32735							1	MK
Sheep_Omasum-3__c204394_59	RGVC32851							1	MK
Sheep_Omasum-5__c847765_50	RGVC32964	K01520	dUTP pyrophosphatase [EC:3.6.1.23] [RN:R02100]	MISC	Information systems	Nucleotide	Pyrimidine deoxyribonuleotide biosynthesis, CDP/CTP => dCDP/dCTP,dTDP/dTTP	2	M
Sheep_Rectum-1__c70_16	RGVC33048							1	M
Sheep_Rectum-1__c70_31	RGVC33048	K21636	ribonucleoside-triphosphate reductase [EC:1.17.4.2 1.1.98.6] [RN:R02022 R11636]	MISC	Information systems	Nucleotide	Pyrimidine deoxyribonuleotide biosynthesis, CDP/CTP => dCDP/dCTP,dTDP/dTTP	1	MKE
Sheep_Rectum-1__c70_310	RGVC33048							1	MK
Sheep_Rectum-1__c70_318	RGVC33048							1	MK
Sheep_Rectum-1__c70_383	RGVC33048							1	MK
Sheep_Rectum-1__c70_56	RGVC33048							1	MK
Sheep_Rectum-1__c70_84	RGVC33048	K01520	dUTP pyrophosphatase [EC:3.6.1.23] [RN:R02100]	MISC	Information systems	Nucleotide	Pyrimidine deoxyribonuleotide biosynthesis, CDP/CTP => dCDP/dCTP,dTDP/dTTP	1	M
Sheep_Rectum-2__c332488_1_150	RGVC33114							2	MK
Sheep_Rectum-2__c332488_1_151	RGVC33114							2	MK
Sheep_Rectum-2__c332488_1_31	RGVC33114	K01520	dUTP pyrophosphatase [EC:3.6.1.23] [RN:R02100]	MISC	Information systems	Nucleotide	Pyrimidine deoxyribonuleotide biosynthesis, CDP/CTP => dCDP/dCTP,dTDP/dTTP	2	M
Sheep_Rectum-2__c332488_1_58	RGVC33114	K00558	DNA (cytosine-5-)-methyltransferase [EC:2.1.1.37] [RN:R04858]	Organic Nitrogen	Amino Acid		Methionine degradation	2	M
Sheep_Rectum-2__c338172_1_42	RGVC33115	K00558	DNA (cytosine-5-)-methyltransferase [EC:2.1.1.37] [RN:R04858]	Organic Nitrogen	Amino Acid		Methionine degradation	2	MF
Sheep_Rectum-2__c450315_1_17	RGVC33123	K00558	DNA (cytosine-5-)-methyltransferase [EC:2.1.1.37] [RN:R04858]	Organic Nitrogen	Amino Acid		Methionine degradation	1	M
Sheep_Rectum-2__c655036_1_13	RGVC33149							2	MK
Sheep_Rectum-2__c735052_142	RGVC33157	A24A	Catlytic type: Aspartate; leader peptides are 5 - 8 residues long, rich in acidic amino acids, and immediately precede a 20-residue hydrophobic region; cleavage site is GlyPhe; process type 4 pilin precursor proteins (prepilins) to their mature forms by removal of leader peptides	Organic Nitrogen	Peptidase		Membrane-inserted endopeptidases	3	M
Sheep_Rectum-2__c735052_156	RGVC33157							3	MK
Sheep_Rectum-2__c735052_62	RGVC33157							3	MK
Sheep_Rectum-2__c958206_67	RGVC33171	K01520	dUTP pyrophosphatase [EC:3.6.1.23] [RN:R02100]	MISC	Information systems	Nucleotide	Pyrimidine deoxyribonuleotide biosynthesis, CDP/CTP => dCDP/dCTP,dTDP/dTTP	2	M
Sheep_Rectum-3__c238083_1_42	RGVC33220	K01520	dUTP pyrophosphatase [EC:3.6.1.23] [RN:R02100]	MISC	Information systems	Nucleotide	Pyrimidine deoxyribonuleotide biosynthesis, CDP/CTP => dCDP/dCTP,dTDP/dTTP	2	M
Sheep_Rectum-3__c45_194	RGVC33241	K01784	UDP-glucose 4-epimerase	carbon utilization (Woodcroft)	sugar utilization (woodcroft)	galactose degradation	Galactose metabolism	2	MK
Sheep_Rectum-3__c45_195	RGVC33241	K00656	formate acetyltransferase (pyruvate-formate lyase )	carbon utilization	pyruvate metabolism		pyruvate metabolism	2	M
Sheep_Rectum-3__c45_200	RGVC33241							2	MK
Sheep_Rectum-3__c502254_1_42	RGVC33247	K01494	dCTP deaminase [EC:3.5.4.13] [RN:R02325]	MISC	Information systems	Nucleotide	Pyrimidine deoxyribonuleotide biosynthesis, CDP/CTP => dCDP/dCTP,dTDP/dTTP	2	M
Sheep_Rectum-3__c502254_1_59	RGVC33247	K00558	DNA (cytosine-5-)-methyltransferase [EC:2.1.1.37] [RN:R04858]	Organic Nitrogen	Amino Acid		Methionine degradation	2	M
Sheep_Rectum-4__c109590_66	RGVC33285							2	MK
Sheep_Rectum-4__c109590_69	RGVC33285							2	MK
Sheep_Rectum-4__c109590_72	RGVC33285							2	MK
Sheep_Rectum-4__c156800_47	RGVC33292	K01520	dUTP pyrophosphatase [EC:3.6.1.23] [RN:R02100]	MISC	Information systems	Nucleotide	Pyrimidine deoxyribonuleotide biosynthesis, CDP/CTP => dCDP/dCTP,dTDP/dTTP	1	M
Sheep_Rectum-4__c156800_52	RGVC33292	K21636	ribonucleoside-triphosphate reductase [EC:1.17.4.2 1.1.98.6] [RN:R02022 R11636]	MISC	Information systems	Nucleotide	Pyrimidine deoxyribonuleotide biosynthesis, CDP/CTP => dCDP/dCTP,dTDP/dTTP	1	MKE
Sheep_Rectum-4__c156800_90	RGVC33292							2	MK
Sheep_Rectum-4__c370_1_108	RGVC33301	K01520	dUTP pyrophosphatase [EC:3.6.1.23] [RN:R02100]	MISC	Information systems	Nucleotide	Pyrimidine deoxyribonuleotide biosynthesis, CDP/CTP => dCDP/dCTP,dTDP/dTTP	3	M
Sheep_Rectum-4__c370_1_138	RGVC33301							3	M
Sheep_Rectum-4__c370_1_63	RGVC33301							3	MK
Sheep_Rectum-4__c370_1_81	RGVC33301	K00789	S-adenosylmethionine synthetase [EC:2.5.1.6] [RN:R00177]	Organic Nitrogen	Amino Acid		Methionine degradation	3	M
Sheep_Rectum-4__c471036_29	RGVC33308							2	MK
Sheep_Rectum-4__c53825_19	RGVC33317	K00558	DNA (cytosine-5-)-methyltransferase [EC:2.1.1.37] [RN:R04858]	Organic Nitrogen	Amino Acid		Methionine degradation	2	M
Sheep_Rectum-4__c53825_22	RGVC33317	K00789	S-adenosylmethionine synthetase [EC:2.5.1.6] [RN:R00177]	Organic Nitrogen	Amino Acid		Methionine degradation	2	M
Sheep_Rectum-5__c186630_1_35	RGVC33343	K00558	DNA (cytosine-5-)-methyltransferase [EC:2.1.1.37] [RN:R04858]	Organic Nitrogen	Amino Acid		Methionine degradation	1	M
Sheep_Rectum-5__c818719_111	RGVC33387	K00558	DNA (cytosine-5-)-methyltransferase [EC:2.1.1.37] [RN:R04858]	Organic Nitrogen	Amino Acid		Methionine degradation	2	M
Sheep_Rectum-5__c818719_28	RGVC33387	K01520	dUTP pyrophosphatase [EC:3.6.1.23] [RN:R02100]	MISC	Information systems	Nucleotide	Pyrimidine deoxyribonuleotide biosynthesis, CDP/CTP => dCDP/dCTP,dTDP/dTTP	2	M
Sheep_Rectum-5__c818719_70	RGVC33387							2	MK
Sheep_Rectum-5__c818719_85	RGVC33387	K21636	ribonucleoside-triphosphate reductase [EC:1.17.4.2 1.1.98.6] [RN:R02022 R11636]	MISC	Information systems	Nucleotide	Pyrimidine deoxyribonuleotide biosynthesis, CDP/CTP => dCDP/dCTP,dTDP/dTTP	2	MKE
Sheep_Reticulum-1__c150_53	RGVC33393	K01520	dUTP pyrophosphatase [EC:3.6.1.23] [RN:R02100]	MISC	Information systems	Nucleotide	Pyrimidine deoxyribonuleotide biosynthesis, CDP/CTP => dCDP/dCTP,dTDP/dTTP	2	M
Sheep_Reticulum-2__c781900_72	RGVC33432							2	MK
Sheep_Reticulum-2__c781900_75	RGVC33432	K21636	ribonucleoside-triphosphate reductase [EC:1.17.4.2 1.1.98.6] [RN:R02022 R11636]	MISC	Information systems	Nucleotide	Pyrimidine deoxyribonuleotide biosynthesis, CDP/CTP => dCDP/dCTP,dTDP/dTTP	2	M
Sheep_Reticulum-2__c781900_78	RGVC33432	K01520	dUTP pyrophosphatase [EC:3.6.1.23] [RN:R02100]	MISC	Information systems	Nucleotide	Pyrimidine deoxyribonuleotide biosynthesis, CDP/CTP => dCDP/dCTP,dTDP/dTTP	2	M
Sheep_Reticulum-5__c380563_44	RGVC33527	K00558	DNA (cytosine-5-)-methyltransferase [EC:2.1.1.37] [RN:R04858]	Organic Nitrogen	Amino Acid		Methionine degradation	2	MF
Sheep_Rumen-1__c1014419_22	RGVC33541	K01243	S-adenosylhomocysteine/5'-methylthioadenosine nucleosidase [EC:3.2.2.9] [RN:R00194]	Organic Nitrogen	Amino Acid		Cysteine biosynthesis, methionine => cysteine	2	MK
Sheep_Rumen-1__c1014419_23	RGVC33541	K07173	S-ribosylhomocysteine lyase [EC:4.4.1.21] [RN:R01291]	Organic Nitrogen	Amino Acid		Cysteine biosynthesis, methionine => cysteine	2	M
Sheep_Rumen-1__c1053580_105	RGVC33546	K21636	ribonucleoside-triphosphate reductase [EC:1.17.4.2 1.1.98.6] [RN:R02022 R11636]	MISC	Information systems	Nucleotide	Pyrimidine deoxyribonuleotide biosynthesis, CDP/CTP => dCDP/dCTP,dTDP/dTTP	1	M
Sheep_Rumen-1__c1053580_107	RGVC33546							1	MK
Sheep_Rumen-1__c1053580_184	RGVC33546	K00560	thymidylate synthase [EC:2.1.1.45] [RN:R02101]	MISC	Information systems	Nucleotide	Pyrimidine deoxyribonuleotide biosynthesis, CDP/CTP => dCDP/dCTP,dTDP/dTTP	2	M
Sheep_Rumen-1__c1053580_95	RGVC33546	K01520	dUTP pyrophosphatase [EC:3.6.1.23] [RN:R02100]	MISC	Information systems	Nucleotide	Pyrimidine deoxyribonuleotide biosynthesis, CDP/CTP => dCDP/dCTP,dTDP/dTTP	1	M
Sheep_Rumen-1__c1053580_98	RGVC33546	K01520	dUTP pyrophosphatase [EC:3.6.1.23] [RN:R02100]	MISC	Information systems	Nucleotide	Pyrimidine deoxyribonuleotide biosynthesis, CDP/CTP => dCDP/dCTP,dTDP/dTTP	1	M
Sheep_Rumen-1__c1266686_101	RGVC33573	K01520	dUTP pyrophosphatase [EC:3.6.1.23] [RN:R02100]	MISC	Information systems	Nucleotide	Pyrimidine deoxyribonuleotide biosynthesis, CDP/CTP => dCDP/dCTP,dTDP/dTTP	2	M
Sheep_Rumen-1__c1266686_240	RGVC33573							1	MK
Sheep_Rumen-1__c1266686_241	RGVC33573							1	MK
Sheep_Rumen-1__c1266686_55	RGVC33573	K01939	adenylosuccinate synthase [EC:6.3.4.4] [RN:R01135]	MISC	Information systems	Nucleotide	Adenine ribonucleotide biosynthesis, IMP => ADP,ATP	2	M
Sheep_Rumen-1__c1266686_94	RGVC33573	K21636	ribonucleoside-triphosphate reductase [EC:1.17.4.2 1.1.98.6] [RN:R02022 R11636]	MISC	Information systems	Nucleotide	Pyrimidine deoxyribonuleotide biosynthesis, CDP/CTP => dCDP/dCTP,dTDP/dTTP	2	MKE
Sheep_Rumen-1__c31874_49	RGVC33618							2	MK
Sheep_Rumen-1__c31874_52	RGVC33618							1	MK
Sheep_Rumen-1__c31874_53	RGVC33618	K21636	ribonucleoside-triphosphate reductase [EC:1.17.4.2 1.1.98.6] [RN:R02022 R11636]	MISC	Information systems	Nucleotide	Pyrimidine deoxyribonuleotide biosynthesis, CDP/CTP => dCDP/dCTP,dTDP/dTTP	1	MKE
Sheep_Rumen-1__c31874_58	RGVC33618	K01520	dUTP pyrophosphatase [EC:3.6.1.23] [RN:R02100]	MISC	Information systems	Nucleotide	Pyrimidine deoxyribonuleotide biosynthesis, CDP/CTP => dCDP/dCTP,dTDP/dTTP	1	M
Sheep_Rumen-1__c474_44	RGVC33637							2	MK
Sheep_Rumen-1__c738837_1_15	RGVC33678	K01520	dUTP pyrophosphatase [EC:3.6.1.23] [RN:R02100]	MISC	Information systems	Nucleotide	Pyrimidine deoxyribonuleotide biosynthesis, CDP/CTP => dCDP/dCTP,dTDP/dTTP	2	M
Sheep_Rumen-1__c833217_1_47	RGVC33699	K21636	ribonucleoside-triphosphate reductase [EC:1.17.4.2 1.1.98.6] [RN:R02022 R11636]	MISC	Information systems	Nucleotide	Pyrimidine deoxyribonuleotide biosynthesis, CDP/CTP => dCDP/dCTP,dTDP/dTTP	1	MKE
Sheep_Rumen-1__c833217_1_53	RGVC33699	K00789	S-adenosylmethionine synthetase [EC:2.5.1.6] [RN:R00177]	Organic Nitrogen	Amino Acid		Methionine degradation	1	M
Sheep_Rumen-1__c833217_1_76	RGVC33699	K00558	DNA (cytosine-5-)-methyltransferase [EC:2.1.1.37] [RN:R04858]	Organic Nitrogen	Amino Acid		Methionine degradation	1	M
Sheep_Rumen-1__c864_11	RGVC33710	M26	Catlytic type: Metallo; cleaves the heavy chain of human IgA1 at the Pro227-Thr228 bond; tightly associated with the bacterial cell surface	Organic Nitrogen	Peptidase		Endopeptidases	2	M
Sheep_Rumen-1__c864_173	RGVC33710	K01520	dUTP pyrophosphatase [EC:3.6.1.23] [RN:R02100]	MISC	Information systems	Nucleotide	Pyrimidine deoxyribonuleotide biosynthesis, CDP/CTP => dCDP/dCTP,dTDP/dTTP	1	M
Sheep_Rumen-1__c864_229	RGVC33710	K21636	ribonucleoside-triphosphate reductase [EC:1.17.4.2 1.1.98.6] [RN:R02022 R11636]	MISC	Information systems	Nucleotide	Pyrimidine deoxyribonuleotide biosynthesis, CDP/CTP => dCDP/dCTP,dTDP/dTTP	2	M
Sheep_Rumen-1__c864_237	RGVC33710							2	MK
Sheep_Rumen-1__c864_65	RGVC33710							1	MK
Sheep_Rumen-1__c868872_1_36	RGVC33712	K00558	DNA (cytosine-5-)-methyltransferase [EC:2.1.1.37] [RN:R04858]	Organic Nitrogen	Amino Acid		Methionine degradation	2	M
Sheep_Rumen-1__c886496_7	RGVC33715							2	MKF
Sheep_Rumen-2__c4010_38	RGVC33809	K01939	adenylosuccinate synthase [EC:6.3.4.4] [RN:R01135]	MISC	Information systems	Nucleotide	Adenine ribonucleotide biosynthesis, IMP => ADP,ATP	1	M
Sheep_Rumen-3__c1508287_17	RGVC33941	K01520	dUTP pyrophosphatase [EC:3.6.1.23] [RN:R02100]	MISC	Information systems	Nucleotide	Pyrimidine deoxyribonuleotide biosynthesis, CDP/CTP => dCDP/dCTP,dTDP/dTTP	1	M
Sheep_Rumen-3__c1508287_8	RGVC33941							2	MK
Sheep_Rumen-3__c379149_35	RGVC33987	K01520	dUTP pyrophosphatase [EC:3.6.1.23] [RN:R02100]	MISC	Information systems	Nucleotide	Pyrimidine deoxyribonuleotide biosynthesis, CDP/CTP => dCDP/dCTP,dTDP/dTTP	2	M
Sheep_Rumen-3__c779854_1_7	RGVC34033	K02050	ABC.SN.P; sulfonate/nitrate/taurine transport system permease protein	Transporters			NitT/TauT family transport system	2	MF
Sheep_Rumen-3__c779854_1_8	RGVC34033	K02051	ABC.SN.S; sulfonate/nitrate/taurine transport system substrate-binding protein	Transporters			NitT/TauT family transport system	2	M
Sheep_Rumen-3__c9367_30	RGVC34068	K16923	qrtT; energy-coupling factor transport system substrate-specific component	Transporters			Energy-coupling factor transport system	2	M
Sheep_Rumen-4__c1140073_6	RGVC34093							2	MF
Sheep_Rumen-4__c1205284_19	RGVC34100	K00558	DNA (cytosine-5-)-methyltransferase [EC:2.1.1.37] [RN:R04858]	Organic Nitrogen	Amino Acid		Methionine degradation	2	M
Sheep_Rumen-4__c204_116	RGVC34127	K01520	dUTP pyrophosphatase [EC:3.6.1.23] [RN:R02100]	MISC	Information systems	Nucleotide	Pyrimidine deoxyribonuleotide biosynthesis, CDP/CTP => dCDP/dCTP,dTDP/dTTP	1	M
Sheep_Rumen-4__c204_12	RGVC34127	K21636	ribonucleoside-triphosphate reductase [EC:1.17.4.2 1.1.98.6] [RN:R02022 R11636]	MISC	Information systems	Nucleotide	Pyrimidine deoxyribonuleotide biosynthesis, CDP/CTP => dCDP/dCTP,dTDP/dTTP	1	MKE
Sheep_Rumen-4__c204_149	RGVC34127	K21636	ribonucleoside-triphosphate reductase [EC:1.17.4.2 1.1.98.6] [RN:R02022 R11636]	MISC	Information systems	Nucleotide	Pyrimidine deoxyribonuleotide biosynthesis, CDP/CTP => dCDP/dCTP,dTDP/dTTP	1	MKE
Sheep_Rumen-4__c204_164	RGVC34127							1	MK
Sheep_Rumen-4__c204_27	RGVC34127							1	MK
Sheep_Rumen-4__c832402_63	RGVC34200	K00558	DNA (cytosine-5-)-methyltransferase [EC:2.1.1.37] [RN:R04858]	Organic Nitrogen	Amino Acid		Methionine degradation	1	M
Sheep_Rumen-5__c1122_14	RGVC34237	K21636	ribonucleoside-triphosphate reductase [EC:1.17.4.2 1.1.98.6] [RN:R02022 R11636]	MISC	Information systems	Nucleotide	Pyrimidine deoxyribonuleotide biosynthesis, CDP/CTP => dCDP/dCTP,dTDP/dTTP	2	M
Sheep_Rumen-5__c1122_20	RGVC34237							2	MK
Sheep_Rumen-5__c1122_23	RGVC34237	K01520	dUTP pyrophosphatase [EC:3.6.1.23] [RN:R02100]	MISC	Information systems	Nucleotide	Pyrimidine deoxyribonuleotide biosynthesis, CDP/CTP => dCDP/dCTP,dTDP/dTTP	2	M
Sheep_Rumen-5__c1439919_16	RGVC34265							2	MK
Sheep_Rumen-5__c1439919_36	RGVC34265	C10	Catlytic type: Cysteine; broad specificity with a hydrophobic residue in the P2 position	Organic Nitrogen	Peptidase		Bacterial cysteine endopeptidases	1	M
Sheep_Rumen-5__c1517112_27	RGVC34274	K00558	DNA (cytosine-5-)-methyltransferase [EC:2.1.1.37] [RN:R04858]	Organic Nitrogen	Amino Acid		Methionine degradation	2	M
Sheep_Rumen-5__c157691_73	RGVC34278	K01520	dUTP pyrophosphatase [EC:3.6.1.23] [RN:R02100]	MISC	Information systems	Nucleotide	Pyrimidine deoxyribonuleotide biosynthesis, CDP/CTP => dCDP/dCTP,dTDP/dTTP	2	M
Sheep_Rumen-5__c1848145_1_67	RGVC34309	K00558	DNA (cytosine-5-)-methyltransferase [EC:2.1.1.37] [RN:R04858]	Organic Nitrogen	Amino Acid		Methionine degradation	2	M
Sheep_Rumen-5__c2165_34	RGVC34313	K00558	DNA (cytosine-5-)-methyltransferase [EC:2.1.1.37] [RN:R04858]	Organic Nitrogen	Amino Acid		Methionine degradation	2	M
Sheep_Rumen-5__c566511_18	RGVC34399	K00558	DNA (cytosine-5-)-methyltransferase [EC:2.1.1.37] [RN:R04858]	Organic Nitrogen	Amino Acid		Methionine degradation	2	M
Sheep_Rumen-5__c566511_20	RGVC34399	K00789	S-adenosylmethionine synthetase [EC:2.5.1.6] [RN:R00177]	Organic Nitrogen	Amino Acid		Methionine degradation	2	M
Sheep_Rumen-5__c566511_51	RGVC34399	K00558	DNA (cytosine-5-)-methyltransferase [EC:2.1.1.37] [RN:R04858]	Organic Nitrogen	Amino Acid		Methionine degradation	2	M
Sheep_Rumen-5__c984550_133	RGVC34454							2	MK
Sheep_Rumen-5__c984550_172	RGVC34454							2	MK
Sheep_Rumen-5__c984550_173	RGVC34454	K21636	ribonucleoside-triphosphate reductase [EC:1.17.4.2 1.1.98.6] [RN:R02022 R11636]	MISC	Information systems	Nucleotide	Pyrimidine deoxyribonuleotide biosynthesis, CDP/CTP => dCDP/dCTP,dTDP/dTTP	2	MKE
Sheep_Rumen-5__c984550_175	RGVC34454	K21636	ribonucleoside-triphosphate reductase [EC:1.17.4.2 1.1.98.6] [RN:R02022 R11636]	MISC	Information systems	Nucleotide	Pyrimidine deoxyribonuleotide biosynthesis, CDP/CTP => dCDP/dCTP,dTDP/dTTP	2	M
Sheep_Rumen-5__c984550_180	RGVC34454	K01520	dUTP pyrophosphatase [EC:3.6.1.23] [RN:R02100]	MISC	Information systems	Nucleotide	Pyrimidine deoxyribonuleotide biosynthesis, CDP/CTP => dCDP/dCTP,dTDP/dTTP	2	MF
Sheep_Rumen-5__c984550_85	RGVC34454	K01939	adenylosuccinate synthase [EC:6.3.4.4] [RN:R01135]	MISC	Information systems	Nucleotide	Adenine ribonucleotide biosynthesis, IMP => ADP,ATP	1	M
Water_buffalos_Abomasum-1__c340984_29	RGVC34481							1	M
Water_buffalos_Abomasum-1__c755760_45	RGVC34512	K00558	DNA (cytosine-5-)-methyltransferase [EC:2.1.1.37] [RN:R04858]	Organic Nitrogen	Amino Acid		Methionine degradation	2	M
Water_buffalos_Cecum-1__c284207_15	RGVC34560	K04069	pyruvate formate lyase activating enzyme	carbon utilization	pyruvate metabolism		pyruvate metabolism	2	M
Water_buffalos_Cecum-1__c284207_20	RGVC34560							2	MK
Water_buffalos_Cecum-1__c284207_42	RGVC34560	K00558	DNA (cytosine-5-)-methyltransferase [EC:2.1.1.37] [RN:R04858]	Organic Nitrogen	Amino Acid		Methionine degradation	2	M
Water_buffalos_Cecum-1__c9_113	RGVC34613							2	MK
Water_buffalos_Cecum-1__c9_119	RGVC34613							2	MK
Water_buffalos_Cecum-1__c9_52	RGVC34613	K01520	dUTP pyrophosphatase [EC:3.6.1.23] [RN:R02100]	MISC	Information systems	Nucleotide	Pyrimidine deoxyribonuleotide biosynthesis, CDP/CTP => dCDP/dCTP,dTDP/dTTP	1	M
Water_buffalos_Cecum-1__c9_56	RGVC34613	K21636	ribonucleoside-triphosphate reductase [EC:1.17.4.2 1.1.98.6] [RN:R02022 R11636]	MISC	Information systems	Nucleotide	Pyrimidine deoxyribonuleotide biosynthesis, CDP/CTP => dCDP/dCTP,dTDP/dTTP	1	MKE
Water_buffalos_Cecum-1__c9_58	RGVC34613							1	MK
Water_buffalos_Cecum-1__c9_80	RGVC34613							2	MK
Water_buffalos_Cecum-2__c1088618_34	RGVC34624							1	MK
Water_buffalos_Cecum-2__c1088618_44	RGVC34624							1	MK
Water_buffalos_Cecum-2__c1088618_64	RGVC34624							1	MK
Water_buffalos_Cecum-2__c1088618_88	RGVC34624	K21636	ribonucleoside-triphosphate reductase [EC:1.17.4.2 1.1.98.6] [RN:R02022 R11636]	MISC	Information systems	Nucleotide	Pyrimidine deoxyribonuleotide biosynthesis, CDP/CTP => dCDP/dCTP,dTDP/dTTP	1	MKE
Water_buffalos_Cecum-2__c1088618_93	RGVC34624	K01520	dUTP pyrophosphatase [EC:3.6.1.23] [RN:R02100]	MISC	Information systems	Nucleotide	Pyrimidine deoxyribonuleotide biosynthesis, CDP/CTP => dCDP/dCTP,dTDP/dTTP	1	M
Water_buffalos_Cecum-2__c702575_14	RGVC34664							2	MK
Water_buffalos_Cecum-2__c702575_36	RGVC34664							2	MK
Water_buffalos_Cecum-2__c702575_71	RGVC34664	K21636	ribonucleoside-triphosphate reductase [EC:1.17.4.2 1.1.98.6] [RN:R02022 R11636]	MISC	Information systems	Nucleotide	Pyrimidine deoxyribonuleotide biosynthesis, CDP/CTP => dCDP/dCTP,dTDP/dTTP	1	MKE
Water_buffalos_Cecum-2__c702575_77	RGVC34664	K01520	dUTP pyrophosphatase [EC:3.6.1.23] [RN:R02100]	MISC	Information systems	Nucleotide	Pyrimidine deoxyribonuleotide biosynthesis, CDP/CTP => dCDP/dCTP,dTDP/dTTP	1	M
Water_buffalos_Cecum-2__c956639_14	RGVC34689	K01520	dUTP pyrophosphatase [EC:3.6.1.23] [RN:R02100]	MISC	Information systems	Nucleotide	Pyrimidine deoxyribonuleotide biosynthesis, CDP/CTP => dCDP/dCTP,dTDP/dTTP	2	M
Water_buffalos_Cecum-4__c144856_31	RGVC34725							2	M
Water_buffalos_Cecum-4__c144856_7	RGVC34725	K21636	ribonucleoside-triphosphate reductase [EC:1.17.4.2 1.1.98.6] [RN:R02022 R11636]	MISC	Information systems	Nucleotide	Pyrimidine deoxyribonuleotide biosynthesis, CDP/CTP => dCDP/dCTP,dTDP/dTTP	2	M
Water_buffalos_Cecum-4__c20_63	RGVC34733	K00558	DNA (cytosine-5-)-methyltransferase [EC:2.1.1.37] [RN:R04858]	Organic Nitrogen	Amino Acid		Methionine degradation	2	M
Water_buffalos_Cecum-4__c22_151	RGVC34736	C110	Catlytic type: Cysteine	Organic Nitrogen	Peptidase		Cysteine endopeptidases	1	M
Water_buffalos_Cecum-4__c22_322	RGVC34736	K01520	dUTP pyrophosphatase [EC:3.6.1.23] [RN:R02100]	MISC	Information systems	Nucleotide	Pyrimidine deoxyribonuleotide biosynthesis, CDP/CTP => dCDP/dCTP,dTDP/dTTP	2	M
Water_buffalos_Cecum-4__c22_327	RGVC34736	K21636	ribonucleoside-triphosphate reductase [EC:1.17.4.2 1.1.98.6] [RN:R02022 R11636]	MISC	Information systems	Nucleotide	Pyrimidine deoxyribonuleotide biosynthesis, CDP/CTP => dCDP/dCTP,dTDP/dTTP	2	MKE
Water_buffalos_Cecum-4__c22_328	RGVC34736							2	MK
Water_buffalos_Cecum-4__c22_392	RGVC34736	C110	Catlytic type: Cysteine	Organic Nitrogen	Peptidase		Cysteine endopeptidases	2	M
Water_buffalos_Cecum-4__c22_81	RGVC34736	K01520	dUTP pyrophosphatase [EC:3.6.1.23] [RN:R02100]	MISC	Information systems	Nucleotide	Pyrimidine deoxyribonuleotide biosynthesis, CDP/CTP => dCDP/dCTP,dTDP/dTTP	1	M
Water_buffalos_Cecum-4__c22_86	RGVC34736	K21636	ribonucleoside-triphosphate reductase [EC:1.17.4.2 1.1.98.6] [RN:R02022 R11636]	MISC	Information systems	Nucleotide	Pyrimidine deoxyribonuleotide biosynthesis, CDP/CTP => dCDP/dCTP,dTDP/dTTP	1	MKE
Water_buffalos_Cecum-4__c22_87	RGVC34736							1	MK
Water_buffalos_Cecum-4__c49434_1_30	RGVC34802	K00558	DNA (cytosine-5-)-methyltransferase [EC:2.1.1.37] [RN:R04858]	Organic Nitrogen	Amino Acid		Methionine degradation	2	M
Water_buffalos_Cecum-4__c498015_125	RGVC34803	K01520	dUTP pyrophosphatase [EC:3.6.1.23] [RN:R02100]	MISC	Information systems	Nucleotide	Pyrimidine deoxyribonuleotide biosynthesis, CDP/CTP => dCDP/dCTP,dTDP/dTTP	2	M
Water_buffalos_Cecum-4__c498015_127	RGVC34803	K01520	dUTP pyrophosphatase [EC:3.6.1.23] [RN:R02100]	MISC	Information systems	Nucleotide	Pyrimidine deoxyribonuleotide biosynthesis, CDP/CTP => dCDP/dCTP,dTDP/dTTP	2	M
Water_buffalos_Cecum-4__c498015_64	RGVC34803							2	MK
Water_buffalos_Cecum-4__c518985_33	RGVC34814	K01520	dUTP pyrophosphatase [EC:3.6.1.23] [RN:R02100]	MISC	Information systems	Nucleotide	Pyrimidine deoxyribonuleotide biosynthesis, CDP/CTP => dCDP/dCTP,dTDP/dTTP	1	M
Water_buffalos_Cecum-4__c76_113	RGVC34863							1	MK
Water_buffalos_Cecum-4__c76_145	RGVC34863							1	MK
Water_buffalos_Cecum-4__c76_16	RGVC34863							1	MK
Water_buffalos_Cecum-4__c76_200	RGVC34863							1	MK
Water_buffalos_Cecum-4__c76_232	RGVC34863							1	MK
Water_buffalos_Cecum-4__c76_233	RGVC34863	K21636	ribonucleoside-triphosphate reductase [EC:1.17.4.2 1.1.98.6] [RN:R02022 R11636]	MISC	Information systems	Nucleotide	Pyrimidine deoxyribonuleotide biosynthesis, CDP/CTP => dCDP/dCTP,dTDP/dTTP	1	MKE
Water_buffalos_Cecum-4__c76_241	RGVC34863	K01520	dUTP pyrophosphatase [EC:3.6.1.23] [RN:R02100]	MISC	Information systems	Nucleotide	Pyrimidine deoxyribonuleotide biosynthesis, CDP/CTP => dCDP/dCTP,dTDP/dTTP	1	M
Water_buffalos_Cecum-5__c146366_18	RGVC34909							2	MK
Water_buffalos_Cecum-5__c317928_125	RGVC34929							1	MK
Water_buffalos_Cecum-5__c317928_243	RGVC34929							1	MK
Water_buffalos_Cecum-5__c317928_244	RGVC34929							1	MK
Water_buffalos_Cecum-5__c317928_259	RGVC34929							1	MK
Water_buffalos_Cecum-5__c317928_279	RGVC34929							1	MKF
Water_buffalos_Cecum-5__c92_36	RGVC34982	K01520	dUTP pyrophosphatase [EC:3.6.1.23] [RN:R02100]	MISC	Information systems	Nucleotide	Pyrimidine deoxyribonuleotide biosynthesis, CDP/CTP => dCDP/dCTP,dTDP/dTTP	1	M
Water_buffalos_Colon-1__c24605_11	RGVC35003	K21636	ribonucleoside-triphosphate reductase [EC:1.17.4.2 1.1.98.6] [RN:R02022 R11636]	MISC	Information systems	Nucleotide	Pyrimidine deoxyribonuleotide biosynthesis, CDP/CTP => dCDP/dCTP,dTDP/dTTP	2	MKE
Water_buffalos_Colon-1__c24605_9	RGVC35003	K01520	dUTP pyrophosphatase [EC:3.6.1.23] [RN:R02100]	MISC	Information systems	Nucleotide	Pyrimidine deoxyribonuleotide biosynthesis, CDP/CTP => dCDP/dCTP,dTDP/dTTP	2	M
Water_buffalos_Colon-5__c219601_3	RGVC35303	K02034	ABC.PE.P1; peptide/nickel transport system permease protein	Transporters			Peptides/nickel transport system	1	MF
Water_buffalos_Colon-5__c553562_45	RGVC35352	K00789	S-adenosylmethionine synthetase [EC:2.5.1.6] [RN:R00177]	Organic Nitrogen	Amino Acid		Methionine degradation	2	M
Water_buffalos_Colon-5__c605283_22	RGVC35361	K01520	dUTP pyrophosphatase [EC:3.6.1.23] [RN:R02100]	MISC	Information systems	Nucleotide	Pyrimidine deoxyribonuleotide biosynthesis, CDP/CTP => dCDP/dCTP,dTDP/dTTP	1	M
Water_buffalos_Colon-5__c605283_24	RGVC35361	K21636	ribonucleoside-triphosphate reductase [EC:1.17.4.2 1.1.98.6] [RN:R02022 R11636]	MISC	Information systems	Nucleotide	Pyrimidine deoxyribonuleotide biosynthesis, CDP/CTP => dCDP/dCTP,dTDP/dTTP	1	MKE
Water_buffalos_Colon-5__c605283_41	RGVC35361	K01491	methylenetetrahydrofolate dehydrogenase (NADP+) / methenyltetrahydrofolate cyclohydrolase [EC:1.5.1.5 3.5.4.9] [RN:R01655 R01220]	Energy	C1		Reductive acetyl-CoA pathway (Wood-Ljungdahl pathway)	1	MK
Water_buffalos_Colon-5__c605283_50	RGVC35361							1	MK
Water_buffalos_Colon-5__c605283_60	RGVC35361							1	MK
Water_buffalos_Colon-5__c710604_264	RGVC35368							1	MKF
Water_buffalos_Colon-5__c710604_32	RGVC35368	K21636	ribonucleoside-triphosphate reductase [EC:1.17.4.2 1.1.98.6] [RN:R02022 R11636]	MISC	Information systems	Nucleotide	Pyrimidine deoxyribonuleotide biosynthesis, CDP/CTP => dCDP/dCTP,dTDP/dTTP	2	MKE
Water_buffalos_Colon-5__c710604_37	RGVC35368	K01520	dUTP pyrophosphatase [EC:3.6.1.23] [RN:R02100]	MISC	Information systems	Nucleotide	Pyrimidine deoxyribonuleotide biosynthesis, CDP/CTP => dCDP/dCTP,dTDP/dTTP	2	M
Water_buffalos_Omasum-1__c102795_3	RGVC35512							2	MKF
Water_buffalos_Omasum-5__c1183493_47	RGVC35629	K00558	DNA (cytosine-5-)-methyltransferase [EC:2.1.1.37] [RN:R04858]	Organic Nitrogen	Amino Acid		Methionine degradation	2	M
Water_buffalos_Omasum-5__c768623_50	RGVC35637	K00558	DNA (cytosine-5-)-methyltransferase [EC:2.1.1.37] [RN:R04858]	Organic Nitrogen	Amino Acid		Methionine degradation	1	M
Water_buffalos_Rectum-1__c778687_17	RGVC35702							2	MK
Water_buffalos_Rectum-1__c778687_18	RGVC35702	K21636	ribonucleoside-triphosphate reductase [EC:1.17.4.2 1.1.98.6] [RN:R02022 R11636]	MISC	Information systems	Nucleotide	Pyrimidine deoxyribonuleotide biosynthesis, CDP/CTP => dCDP/dCTP,dTDP/dTTP	2	MKE
Water_buffalos_Rectum-1__c778687_181	RGVC35702							1	MK
Water_buffalos_Rectum-1__c778687_23	RGVC35702	K01520	dUTP pyrophosphatase [EC:3.6.1.23] [RN:R02100]	MISC	Information systems	Nucleotide	Pyrimidine deoxyribonuleotide biosynthesis, CDP/CTP => dCDP/dCTP,dTDP/dTTP	2	M
Water_buffalos_Rectum-4__c21561_222	RGVC35897							1	MK
Water_buffalos_Rectum-4__c21561_90	RGVC35897							1	MK
Water_buffalos_Rectum-4__c216664_12	RGVC35900							1	MK
Water_buffalos_Rectum-4__c216664_133	RGVC35900							2	MK
Water_buffalos_Rectum-4__c216664_134	RGVC35900	K00560	thymidylate synthase [EC:2.1.1.45] [RN:R02101]	MISC	Information systems	Nucleotide	Pyrimidine deoxyribonuleotide biosynthesis, CDP/CTP => dCDP/dCTP,dTDP/dTTP	2	M
Water_buffalos_Rectum-4__c216664_82	RGVC35900							2	MK
Water_buffalos_Rectum-4__c216664_83	RGVC35900	K01520	dUTP pyrophosphatase [EC:3.6.1.23] [RN:R02100]	MISC	Information systems	Nucleotide	Pyrimidine deoxyribonuleotide biosynthesis, CDP/CTP => dCDP/dCTP,dTDP/dTTP	2	M
Water_buffalos_Rectum-4__c216664_88	RGVC35900	K00525	ribonucleoside-diphosphate reductase [EC:1.17.4.1] [RN:R02024]	MISC	Information systems	Nucleotide	Pyrimidine deoxyribonuleotide biosynthesis, CDP/CTP => dCDP/dCTP,dTDP/dTTP	2	MKE
Water_buffalos_Rectum-4__c250772_106	RGVC35904							1	MK
Water_buffalos_Rectum-4__c250772_138	RGVC35904							1	MK
Water_buffalos_Rectum-4__c250772_140	RGVC35904	K21636	ribonucleoside-triphosphate reductase [EC:1.17.4.2 1.1.98.6] [RN:R02022 R11636]	MISC	Information systems	Nucleotide	Pyrimidine deoxyribonuleotide biosynthesis, CDP/CTP => dCDP/dCTP,dTDP/dTTP	1	MKE
Water_buffalos_Rectum-4__c250772_145	RGVC35904	K01520	dUTP pyrophosphatase [EC:3.6.1.23] [RN:R02100]	MISC	Information systems	Nucleotide	Pyrimidine deoxyribonuleotide biosynthesis, CDP/CTP => dCDP/dCTP,dTDP/dTTP	1	M
Water_buffalos_Rectum-4__c250772_59	RGVC35904							2	MK
Water_buffalos_Rectum-5__c279360_50	RGVC35959	K01520	dUTP pyrophosphatase [EC:3.6.1.23] [RN:R02100]	MISC	Information systems	Nucleotide	Pyrimidine deoxyribonuleotide biosynthesis, CDP/CTP => dCDP/dCTP,dTDP/dTTP	2	MF
Water_buffalos_Rectum-5__c458306_250	RGVC35981							1	MK
Water_buffalos_Rectum-5__c458306_282	RGVC35981							1	M
Water_buffalos_Rectum-5__c458306_330	RGVC35981	K04069	pyruvate formate lyase activating enzyme	carbon utilization	pyruvate metabolism		pyruvate metabolism	2	M
Water_buffalos_Rectum-5__c458306_338	RGVC35981	K21636	ribonucleoside-triphosphate reductase [EC:1.17.4.2 1.1.98.6] [RN:R02022 R11636]	MISC	Information systems	Nucleotide	Pyrimidine deoxyribonuleotide biosynthesis, CDP/CTP => dCDP/dCTP,dTDP/dTTP	2	M
Water_buffalos_Rectum-5__c56220_17	RGVC36001	K00560	thymidylate synthase [EC:2.1.1.45] [RN:R02101]	MISC	Information systems	Nucleotide	Pyrimidine deoxyribonuleotide biosynthesis, CDP/CTP => dCDP/dCTP,dTDP/dTTP	1	M
Water_buffalos_Rectum-5__c56220_177	RGVC36001							1	MK
Water_buffalos_Rectum-5__c56220_278	RGVC36001							1	MK
Water_buffalos_Rectum-5__c56220_308	RGVC36001							1	MK
Water_buffalos_Rectum-5__c56220_311	RGVC36001							1	MK
Water_buffalos_Rectum-5__c56220_34	RGVC36001							1	MK
Water_buffalos_Rectum-5__c56220_35	RGVC36001	K21636	ribonucleoside-triphosphate reductase [EC:1.17.4.2 1.1.98.6] [RN:R02022 R11636]	MISC	Information systems	Nucleotide	Pyrimidine deoxyribonuleotide biosynthesis, CDP/CTP => dCDP/dCTP,dTDP/dTTP	1	MKE
Water_buffalos_Reticulum-1__c123523_105	RGVC36033	C110	Catlytic type: Cysteine	Organic Nitrogen	Peptidase		Cysteine endopeptidases	1	M
Water_buffalos_Reticulum-1__c123523_15	RGVC36033							2	MK
Water_buffalos_Reticulum-1__c123523_73	RGVC36033	K21636	ribonucleoside-triphosphate reductase [EC:1.17.4.2 1.1.98.6] [RN:R02022 R11636]	MISC	Information systems	Nucleotide	Pyrimidine deoxyribonuleotide biosynthesis, CDP/CTP => dCDP/dCTP,dTDP/dTTP	2	M
Water_buffalos_Reticulum-1__c123523_75	RGVC36033							2	MK
Water_buffalos_Reticulum-1__c21022_155	RGVC36042	U69	Self-processing occurs at the Ser846|+|Ala bond.	Organic Nitrogen	Peptidase		Self-processing peptidases	1	M
Water_buffalos_Reticulum-1__c21022_159	RGVC36042							1	M
Water_buffalos_Reticulum-1__c21022_160	RGVC36042	K21636	ribonucleoside-triphosphate reductase [EC:1.17.4.2 1.1.98.6] [RN:R02022 R11636]	MISC	Information systems	Nucleotide	Pyrimidine deoxyribonuleotide biosynthesis, CDP/CTP => dCDP/dCTP,dTDP/dTTP	1	M
Water_buffalos_Reticulum-1__c21022_191	RGVC36042							1	MK
Water_buffalos_Reticulum-1__c21022_221	RGVC36042							1	MK
Water_buffalos_Reticulum-1__c21022_253	RGVC36042							1	M
Water_buffalos_Reticulum-1__c21022_292	RGVC36042							1	MK
Water_buffalos_Reticulum-1__c21022_44	RGVC36042							1	MK
Water_buffalos_Reticulum-1__c21022_45	RGVC36042	K00560	thymidylate synthase [EC:2.1.1.45] [RN:R02101]	MISC	Information systems	Nucleotide	Pyrimidine deoxyribonuleotide biosynthesis, CDP/CTP => dCDP/dCTP,dTDP/dTTP	1	M
Water_buffalos_Reticulum-1__c37423_122	RGVC36052	K01520	dUTP pyrophosphatase [EC:3.6.1.23] [RN:R02100]	MISC	Information systems	Nucleotide	Pyrimidine deoxyribonuleotide biosynthesis, CDP/CTP => dCDP/dCTP,dTDP/dTTP	1	M
Water_buffalos_Reticulum-1__c37423_283	RGVC36052	K01939	adenylosuccinate synthase [EC:6.3.4.4] [RN:R01135]	MISC	Information systems	Nucleotide	Adenine ribonucleotide biosynthesis, IMP => ADP,ATP	2	M
Water_buffalos_Reticulum-1__c37423_318	RGVC36052							2	MK
Water_buffalos_Reticulum-1__c37423_74	RGVC36052	K00789	S-adenosylmethionine synthetase [EC:2.5.1.6] [RN:R00177]	Organic Nitrogen	Amino Acid		Methionine degradation	2	M
Water_buffalos_Reticulum-1__c444710_70	RGVC36057	K01520	dUTP pyrophosphatase [EC:3.6.1.23] [RN:R02100]	MISC	Information systems	Nucleotide	Pyrimidine deoxyribonuleotide biosynthesis, CDP/CTP => dCDP/dCTP,dTDP/dTTP	2	M
Water_buffalos_Rumen-1__c1106330_8	RGVC36180	K00558	DNA (cytosine-5-)-methyltransferase [EC:2.1.1.37] [RN:R04858]	Organic Nitrogen	Amino Acid		Methionine degradation	2	M
Water_buffalos_Rumen-1__c115068_1_51	RGVC36191	K00558	DNA (cytosine-5-)-methyltransferase [EC:2.1.1.37] [RN:R04858]	Organic Nitrogen	Amino Acid		Methionine degradation	2	M
Water_buffalos_Rumen-1__c1227228_10	RGVC36202	K00558	DNA (cytosine-5-)-methyltransferase [EC:2.1.1.37] [RN:R04858]	Organic Nitrogen	Amino Acid		Methionine degradation	1	M
Water_buffalos_Rumen-1__c1227228_26	RGVC36202	K00789	S-adenosylmethionine synthetase [EC:2.5.1.6] [RN:R00177]	Organic Nitrogen	Amino Acid		Methionine degradation	2	M
Water_buffalos_Rumen-1__c1227228_45	RGVC36202	K00558	DNA (cytosine-5-)-methyltransferase [EC:2.1.1.37] [RN:R04858]	Organic Nitrogen	Amino Acid		Methionine degradation	2	M
Water_buffalos_Rumen-1__c140276_10	RGVC36211	K00558	DNA (cytosine-5-)-methyltransferase [EC:2.1.1.37] [RN:R04858]	Organic Nitrogen	Amino Acid		Methionine degradation	2	M
Water_buffalos_Rumen-3__c1605480_38	RGVC36508	K00558	DNA (cytosine-5-)-methyltransferase [EC:2.1.1.37] [RN:R04858]	Organic Nitrogen	Amino Acid		Methionine degradation	2	M
Water_buffalos_Rumen-3__c1605480_40	RGVC36508	K00789	S-adenosylmethionine synthetase [EC:2.5.1.6] [RN:R00177]	Organic Nitrogen	Amino Acid		Methionine degradation	2	M
Water_buffalos_Rumen-3__c1692562_15	RGVC36524	K01520	dUTP pyrophosphatase [EC:3.6.1.23] [RN:R02100]	MISC	Information systems	Nucleotide	Pyrimidine deoxyribonuleotide biosynthesis, CDP/CTP => dCDP/dCTP,dTDP/dTTP	2	M
Water_buffalos_Rumen-3__c17_13	RGVC36525	K01520	dUTP pyrophosphatase [EC:3.6.1.23] [RN:R02100]	MISC	Information systems	Nucleotide	Pyrimidine deoxyribonuleotide biosynthesis, CDP/CTP => dCDP/dCTP,dTDP/dTTP	2	M
Water_buffalos_Rumen-3__c17_23	RGVC36525	K21636	ribonucleoside-triphosphate reductase [EC:1.17.4.2 1.1.98.6] [RN:R02022 R11636]	MISC	Information systems	Nucleotide	Pyrimidine deoxyribonuleotide biosynthesis, CDP/CTP => dCDP/dCTP,dTDP/dTTP	2	M
Water_buffalos_Rumen-3__c17_315	RGVC36525							2	MK
Water_buffalos_Rumen-3__c17_70	RGVC36525							1	MK
Water_buffalos_Rumen-3__c17_73	RGVC36525							1	MK
Water_buffalos_Rumen-3__c17_75	RGVC36525							1	MK
Water_buffalos_Rumen-3__c17_79	RGVC36525							1	MK
Water_buffalos_Rumen-3__c17_8	RGVC36525	K02970	small subunit ribosomal protein S21	MISC	Information systems		Ribosome, bacteria	2	M
Water_buffalos_Rumen-3__c192160_18	RGVC36547	K01520	dUTP pyrophosphatase [EC:3.6.1.23] [RN:R02100]	MISC	Information systems	Nucleotide	Pyrimidine deoxyribonuleotide biosynthesis, CDP/CTP => dCDP/dCTP,dTDP/dTTP	2	M
Water_buffalos_Rumen-3__c765019_131	RGVC36627							2	MK
Water_buffalos_Rumen-3__c765019_276	RGVC36627	K01520	dUTP pyrophosphatase [EC:3.6.1.23] [RN:R02100]	MISC	Information systems	Nucleotide	Pyrimidine deoxyribonuleotide biosynthesis, CDP/CTP => dCDP/dCTP,dTDP/dTTP	1	M
Water_buffalos_Rumen-3__c765019_329	RGVC36627							2	MK
Water_buffalos_Rumen-3__c765019_34	RGVC36627							2	MK
Water_buffalos_Rumen-3__c765019_460	RGVC36627							2	MK
Water_buffalos_Rumen-3__c789912_42	RGVC36630							2	MK
Water_buffalos_Rumen-3__c789912_52	RGVC36630							2	M
Water_buffalos_Rumen-4__c1701942_14	RGVC36707	K00558	DNA (cytosine-5-)-methyltransferase [EC:2.1.1.37] [RN:R04858]	Organic Nitrogen	Amino Acid		Methionine degradation	2	M
Water_buffalos_Rumen-5__c1519785_11	RGVC36810							1	M
Water_buffalos_Rumen-5__c1519785_61	RGVC36810	K01520	dUTP pyrophosphatase [EC:3.6.1.23] [RN:R02100]	MISC	Information systems	Nucleotide	Pyrimidine deoxyribonuleotide biosynthesis, CDP/CTP => dCDP/dCTP,dTDP/dTTP	2	M
Water_deer_Abomasum-2__c83489_1_28	RGVC36949							2	MK
Water_deer_Abomasum-3__c190407_54	RGVC36957	K01520	dUTP pyrophosphatase [EC:3.6.1.23] [RN:R02100]	MISC	Information systems	Nucleotide	Pyrimidine deoxyribonuleotide biosynthesis, CDP/CTP => dCDP/dCTP,dTDP/dTTP	2	M
Water_deer_Abomasum-5__c120190_55	RGVC37026	K01520	dUTP pyrophosphatase [EC:3.6.1.23] [RN:R02100]	MISC	Information systems	Nucleotide	Pyrimidine deoxyribonuleotide biosynthesis, CDP/CTP => dCDP/dCTP,dTDP/dTTP	1	M
Water_deer_Cecum-1__c166929_1_101	RGVC37075	K00558	DNA (cytosine-5-)-methyltransferase [EC:2.1.1.37] [RN:R04858]	Organic Nitrogen	Amino Acid		Methionine degradation	1	M
Water_deer_Cecum-1__c19616_124	RGVC37081							2	MK
Water_deer_Cecum-1__c19616_30	RGVC37081	C110	Catlytic type: Cysteine	Organic Nitrogen	Peptidase		Cysteine endopeptidases	1	M
Water_deer_Cecum-1__c19616_82	RGVC37081							2	MK
Water_deer_Cecum-1__c19616_83	RGVC37081	K21636	ribonucleoside-triphosphate reductase [EC:1.17.4.2 1.1.98.6] [RN:R02022 R11636]	MISC	Information systems	Nucleotide	Pyrimidine deoxyribonuleotide biosynthesis, CDP/CTP => dCDP/dCTP,dTDP/dTTP	2	M
Water_deer_Cecum-1__c198655_78	RGVC37082							1	M
Water_deer_Cecum-1__c198655_79	RGVC37082	M55	Catlytic type: Metallo; cleaves D-Ala-D-Ala and D-Ala-Gly-Gly	Organic Nitrogen	Peptidase		Aminopeptidase and a number of uncharacterised putative peptidases	1	M
Water_deer_Cecum-1__c201813_116	RGVC37084							2	MK
Water_deer_Cecum-1__c201813_48	RGVC37084	K01520	dUTP pyrophosphatase [EC:3.6.1.23] [RN:R02100]	MISC	Information systems	Nucleotide	Pyrimidine deoxyribonuleotide biosynthesis, CDP/CTP => dCDP/dCTP,dTDP/dTTP	1	M
Water_deer_Cecum-1__c201813_53	RGVC37084	K21636	ribonucleoside-triphosphate reductase [EC:1.17.4.2 1.1.98.6] [RN:R02022 R11636]	MISC	Information systems	Nucleotide	Pyrimidine deoxyribonuleotide biosynthesis, CDP/CTP => dCDP/dCTP,dTDP/dTTP	1	MKE
Water_deer_Cecum-1__c201813_90	RGVC37084							2	MK
Water_deer_Cecum-1__c3425_1_9	RGVC37107	K00558	DNA (cytosine-5-)-methyltransferase [EC:2.1.1.37] [RN:R04858]	Organic Nitrogen	Amino Acid		Methionine degradation	1	M
Water_deer_Cecum-2__c112835_17	RGVC37149	K01520	dUTP pyrophosphatase [EC:3.6.1.23] [RN:R02100]	MISC	Information systems	Nucleotide	Pyrimidine deoxyribonuleotide biosynthesis, CDP/CTP => dCDP/dCTP,dTDP/dTTP	2	M
Water_deer_Cecum-2__c268796_26	RGVC37179							1	MK
Water_deer_Cecum-2__c268796_29	RGVC37179							1	MK
Water_deer_Cecum-2__c268796_30	RGVC37179	K01520	dUTP pyrophosphatase [EC:3.6.1.23] [RN:R02100]	MISC	Information systems	Nucleotide	Pyrimidine deoxyribonuleotide biosynthesis, CDP/CTP => dCDP/dCTP,dTDP/dTTP	1	M
Water_deer_Cecum-2__c268796_41	RGVC37179	K21636	ribonucleoside-triphosphate reductase [EC:1.17.4.2 1.1.98.6] [RN:R02022 R11636]	MISC	Information systems	Nucleotide	Pyrimidine deoxyribonuleotide biosynthesis, CDP/CTP => dCDP/dCTP,dTDP/dTTP	1	MKE
Water_deer_Cecum-3__c127_1_174	RGVC37262	K00558	DNA (cytosine-5-)-methyltransferase [EC:2.1.1.37] [RN:R04858]	Organic Nitrogen	Amino Acid		Methionine degradation	2	M
Water_deer_Cecum-3__c127_1_200	RGVC37262	K00558	DNA (cytosine-5-)-methyltransferase [EC:2.1.1.37] [RN:R04858]	Organic Nitrogen	Amino Acid		Methionine degradation	2	M
Water_deer_Cecum-3__c127_1_244	RGVC37262							2	MK
Water_deer_Cecum-3__c127_1_248	RGVC37262	K21636	ribonucleoside-triphosphate reductase [EC:1.17.4.2 1.1.98.6] [RN:R02022 R11636]	MISC	Information systems	Nucleotide	Pyrimidine deoxyribonuleotide biosynthesis, CDP/CTP => dCDP/dCTP,dTDP/dTTP	2	MKEF
Water_deer_Cecum-3__c127_1_25	RGVC37262							2	MK
Water_deer_Cecum-3__c127_1_250	RGVC37262	K21636	ribonucleoside-triphosphate reductase [EC:1.17.4.2 1.1.98.6] [RN:R02022 R11636]	MISC	Information systems	Nucleotide	Pyrimidine deoxyribonuleotide biosynthesis, CDP/CTP => dCDP/dCTP,dTDP/dTTP	2	MF
Water_deer_Cecum-3__c127_1_29	RGVC37262							2	MK
Water_deer_Cecum-3__c127_1_64	RGVC37262							2	MK
Water_deer_Colon-2__c334089_297	RGVC37442	K21636	ribonucleoside-triphosphate reductase [EC:1.17.4.2 1.1.98.6] [RN:R02022 R11636]	MISC	Information systems	Nucleotide	Pyrimidine deoxyribonuleotide biosynthesis, CDP/CTP => dCDP/dCTP,dTDP/dTTP	2	M
Water_deer_Colon-2__c334089_63	RGVC37442	K01520	dUTP pyrophosphatase [EC:3.6.1.23] [RN:R02100]	MISC	Information systems	Nucleotide	Pyrimidine deoxyribonuleotide biosynthesis, CDP/CTP => dCDP/dCTP,dTDP/dTTP	1	M
Water_deer_Colon-2__c334089_84	RGVC37442							1	M
Water_deer_Colon-4__c51996_12	RGVC37604	C110	Catlytic type: Cysteine	Organic Nitrogen	Peptidase		Cysteine endopeptidases	1	M
Water_deer_Colon-4__c51996_32	RGVC37604	K00558	DNA (cytosine-5-)-methyltransferase [EC:2.1.1.37] [RN:R04858]	Organic Nitrogen	Amino Acid		Methionine degradation	2	M
Water_deer_Colon-4__c51996_48	RGVC37604	K01494	dCTP deaminase [EC:3.5.4.13] [RN:R02325]	MISC	Information systems	Nucleotide	Pyrimidine deoxyribonuleotide biosynthesis, CDP/CTP => dCDP/dCTP,dTDP/dTTP	2	M
Water_deer_Colon-4__c64294_117	RGVC37609							1	MK
Water_deer_Colon-4__c64294_42	RGVC37609							1	MK
Water_deer_Colon-4__c64294_59	RGVC37609	K01520	dUTP pyrophosphatase [EC:3.6.1.23] [RN:R02100]	MISC	Information systems	Nucleotide	Pyrimidine deoxyribonuleotide biosynthesis, CDP/CTP => dCDP/dCTP,dTDP/dTTP	1	M
Water_deer_Ileum-2__c19123_109	RGVC37675	K21636	ribonucleoside-triphosphate reductase [EC:1.17.4.2 1.1.98.6] [RN:R02022 R11636]	MISC	Information systems	Nucleotide	Pyrimidine deoxyribonuleotide biosynthesis, CDP/CTP => dCDP/dCTP,dTDP/dTTP	1	M
Water_deer_Ileum-2__c19123_112	RGVC37675	K21636	ribonucleoside-triphosphate reductase [EC:1.17.4.2 1.1.98.6] [RN:R02022 R11636]	MISC	Information systems	Nucleotide	Pyrimidine deoxyribonuleotide biosynthesis, CDP/CTP => dCDP/dCTP,dTDP/dTTP	1	MKE
Water_deer_Ileum-2__c19123_118	RGVC37675	K01520	dUTP pyrophosphatase [EC:3.6.1.23] [RN:R02100]	MISC	Information systems	Nucleotide	Pyrimidine deoxyribonuleotide biosynthesis, CDP/CTP => dCDP/dCTP,dTDP/dTTP	1	M
Water_deer_Ileum-2__c19123_159	RGVC37675							1	MK
Water_deer_Ileum-2__c19123_177	RGVC37675							1	MK
Water_deer_Ileum-2__c19123_179	RGVC37675							1	MK
Water_deer_Ileum-2__c19123_560	RGVC37675							2	MK
Water_deer_Ileum-2__c19123_8	RGVC37675							1	MK
Water_deer_Ileum-2__c83_3	RGVC37717	K21636	ribonucleoside-triphosphate reductase [EC:1.17.4.2 1.1.98.6] [RN:R02022 R11636]	MISC	Information systems	Nucleotide	Pyrimidine deoxyribonuleotide biosynthesis, CDP/CTP => dCDP/dCTP,dTDP/dTTP	2	MF
Water_deer_Ileum-2__c83_6	RGVC37717	K00558	DNA (cytosine-5-)-methyltransferase [EC:2.1.1.37] [RN:R04858]	Organic Nitrogen	Amino Acid		Methionine degradation	2	MF
Water_deer_Jejunum-2__c232_132	RGVC37801							1	MK
Water_deer_Jejunum-2__c232_210	RGVC37801							1	MK
Water_deer_Jejunum-2__c232_211	RGVC37801							1	MK
Water_deer_Jejunum-2__c232_247	RGVC37801							1	MK
Water_deer_Jejunum-2__c232_277	RGVC37801							1	M
Water_deer_Jejunum-2__c232_45	RGVC37801							1	MK
Water_deer_Jejunum-2__c232_49	RGVC37801							1	MK
Water_deer_Jejunum-2__c232_53	RGVC37801	K01939	adenylosuccinate synthase [EC:6.3.4.4] [RN:R01135]	MISC	Information systems	Nucleotide	Adenine ribonucleotide biosynthesis, IMP => ADP,ATP	1	M
Water_deer_Jejunum-2__c232_70	RGVC37801							1	MK
Water_deer_Jejunum-2__c232_78	RGVC37801	M18	Catlytic type: Metallo; acting on N-terminal leucine and most other amino acids	Organic Nitrogen	Peptidase		Metalloaminopeptidases	1	M
Water_deer_Jejunum-2__c232_91	RGVC37801							1	MK
Water_deer_Omasum-1__c21180_1_30	RGVC37844							2	MK
Water_deer_Omasum-1__c21180_1_41	RGVC37844	K00558	DNA (cytosine-5-)-methyltransferase [EC:2.1.1.37] [RN:R04858]	Organic Nitrogen	Amino Acid		Methionine degradation	2	M
Water_deer_Omasum-4__c131_103	RGVC37921	K01520	dUTP pyrophosphatase [EC:3.6.1.23] [RN:R02100]	MISC	Information systems	Nucleotide	Pyrimidine deoxyribonuleotide biosynthesis, CDP/CTP => dCDP/dCTP,dTDP/dTTP	1	M
Water_deer_Rectum-1__c10188_116	RGVC37972							1	MK
Water_deer_Rectum-1__c10188_117	RGVC37972							1	MK
Water_deer_Rectum-1__c10188_123	RGVC37972							1	MK
Water_deer_Rectum-1__c10188_149	RGVC37972							2	MK
Water_deer_Rectum-1__c10188_151	RGVC37972	K21636	ribonucleoside-triphosphate reductase [EC:1.17.4.2 1.1.98.6] [RN:R02022 R11636]	MISC	Information systems	Nucleotide	Pyrimidine deoxyribonuleotide biosynthesis, CDP/CTP => dCDP/dCTP,dTDP/dTTP	2	M
Water_deer_Rectum-1__c10188_157	RGVC37972	K01520	dUTP pyrophosphatase [EC:3.6.1.23] [RN:R02100]	MISC	Information systems	Nucleotide	Pyrimidine deoxyribonuleotide biosynthesis, CDP/CTP => dCDP/dCTP,dTDP/dTTP	2	M
Water_deer_Rectum-1__c198_13	RGVC38001							2	MK
Water_deer_Rectum-1__c222648_76	RGVC38010	K01520	dUTP pyrophosphatase [EC:3.6.1.23] [RN:R02100]	MISC	Information systems	Nucleotide	Pyrimidine deoxyribonuleotide biosynthesis, CDP/CTP => dCDP/dCTP,dTDP/dTTP	2	M
Water_deer_Rectum-1__c235761_103	RGVC38017							2	MK
Water_deer_Rectum-1__c235761_117	RGVC38017							2	MK
Water_deer_Rectum-1__c235761_166	RGVC38017	K01520	dUTP pyrophosphatase [EC:3.6.1.23] [RN:R02100]	MISC	Information systems	Nucleotide	Pyrimidine deoxyribonuleotide biosynthesis, CDP/CTP => dCDP/dCTP,dTDP/dTTP	2	M
Water_deer_Rectum-1__c354371_67	RGVC38072							2	M
Water_deer_Rectum-2__c52423_1_62	RGVC38172	EC:1.20.4.1	arsenate reductase (glutaredoxin); ArsC (ambiguous)	Energy	Metal Reduction		Arsenate	1	M
Water_deer_Rectum-3__c267540_1_20	RGVC38210	K00789	S-adenosylmethionine synthetase [EC:2.5.1.6] [RN:R00177]	Organic Nitrogen	Amino Acid		Methionine degradation	2	M
Water_deer_Rectum-3__c267540_1_22	RGVC38210	K00558	DNA (cytosine-5-)-methyltransferase [EC:2.1.1.37] [RN:R04858]	Organic Nitrogen	Amino Acid		Methionine degradation	2	M
Water_deer_Rectum-3__c362925_77	RGVC38218	K01494	dCTP deaminase [EC:3.5.4.13] [RN:R02325]	MISC	Information systems	Nucleotide	Pyrimidine deoxyribonuleotide biosynthesis, CDP/CTP => dCDP/dCTP,dTDP/dTTP	2	M
Water_deer_Rectum-3__c362925_81	RGVC38218	K00558	DNA (cytosine-5-)-methyltransferase [EC:2.1.1.37] [RN:R04858]	Organic Nitrogen	Amino Acid		Methionine degradation	2	MF
Water_deer_Rectum-4__c145109_46	RGVC38281	K21636	ribonucleoside-triphosphate reductase [EC:1.17.4.2 1.1.98.6] [RN:R02022 R11636]	MISC	Information systems	Nucleotide	Pyrimidine deoxyribonuleotide biosynthesis, CDP/CTP => dCDP/dCTP,dTDP/dTTP	1	M
Water_deer_Rectum-4__c145109_74	RGVC38281							1	MK
Water_deer_Rectum-4__c219904_25	RGVC38310	K00558	DNA (cytosine-5-)-methyltransferase [EC:2.1.1.37] [RN:R04858]	Organic Nitrogen	Amino Acid		Methionine degradation	2	M
Water_deer_Rectum-4__c219904_31	RGVC38310	K00789	S-adenosylmethionine synthetase [EC:2.5.1.6] [RN:R00177]	Organic Nitrogen	Amino Acid		Methionine degradation	2	M
Water_deer_Rectum-4__c27065_1_20	RGVC38333	K01520	dUTP pyrophosphatase [EC:3.6.1.23] [RN:R02100]	MISC	Information systems	Nucleotide	Pyrimidine deoxyribonuleotide biosynthesis, CDP/CTP => dCDP/dCTP,dTDP/dTTP	2	M
Water_deer_Rectum-4__c331736_28	RGVC38351	C110	Catlytic type: Cysteine	Organic Nitrogen	Peptidase		Cysteine endopeptidases	2	M
Water_deer_Rectum-4__c46465_46	RGVC38360	K00789	S-adenosylmethionine synthetase [EC:2.5.1.6] [RN:R00177]	Organic Nitrogen	Amino Acid		Methionine degradation	1	M
Water_deer_Rectum-4__c46465_47	RGVC38360	K00558	DNA (cytosine-5-)-methyltransferase [EC:2.1.1.37] [RN:R04858]	Organic Nitrogen	Amino Acid		Methionine degradation	1	M
Water_deer_Rectum-4__c46465_66	RGVC38360							1	MK
Water_deer_Rectum-4__c46465_67	RGVC38360	K00390	phosphoadenosine phosphosulfate reductase [EC:1.8.4.8] [RN:R02021]	Energy	Sulfur		Assimilatory sulfate reduction, sulfate => H2S	1	M
Water_deer_Rectum-5__c1391_35	RGVC38385	K01520	dUTP pyrophosphatase [EC:3.6.1.23] [RN:R02100]	MISC	Information systems	Nucleotide	Pyrimidine deoxyribonuleotide biosynthesis, CDP/CTP => dCDP/dCTP,dTDP/dTTP	1	M
Water_deer_Rectum-5__c229_152	RGVC38387	K01494	dCTP deaminase [EC:3.5.4.13] [RN:R02325]	MISC	Information systems	Nucleotide	Pyrimidine deoxyribonuleotide biosynthesis, CDP/CTP => dCDP/dCTP,dTDP/dTTP	2	M
Water_deer_Rectum-5__c229_167	RGVC38387	K00558	DNA (cytosine-5-)-methyltransferase [EC:2.1.1.37] [RN:R04858]	Organic Nitrogen	Amino Acid		Methionine degradation	2	MF
Water_deer_Rectum-5__c229_22	RGVC38387							2	M
Water_deer_Rectum-5__c605_109	RGVC38393	K00558	DNA (cytosine-5-)-methyltransferase [EC:2.1.1.37] [RN:R04858]	Organic Nitrogen	Amino Acid		Methionine degradation	2	M
Water_deer_Rectum-5__c605_22	RGVC38393	K02990	small subunit ribosomal protein S6	MISC	Information systems		Ribosome, bacteria	2	M
Water_deer_Rectum-5__c605_61	RGVC38393	K01520	dUTP pyrophosphatase [EC:3.6.1.23] [RN:R02100]	MISC	Information systems	Nucleotide	Pyrimidine deoxyribonuleotide biosynthesis, CDP/CTP => dCDP/dCTP,dTDP/dTTP	2	M
Water_deer_Rectum-5__c605_84	RGVC38393	K21636	ribonucleoside-triphosphate reductase [EC:1.17.4.2 1.1.98.6] [RN:R02022 R11636]	MISC	Information systems	Nucleotide	Pyrimidine deoxyribonuleotide biosynthesis, CDP/CTP => dCDP/dCTP,dTDP/dTTP	2	M
Water_deer_Reticulum-2__c79794_1_51	RGVC38422	K01520	dUTP pyrophosphatase [EC:3.6.1.23] [RN:R02100]	MISC	Information systems	Nucleotide	Pyrimidine deoxyribonuleotide biosynthesis, CDP/CTP => dCDP/dCTP,dTDP/dTTP	2	M
Water_deer_Reticulum-4__c149428_1_19	RGVC38445							2	MK
Water_deer_Reticulum-5__c541_83	RGVC38491	K00558	DNA (cytosine-5-)-methyltransferase [EC:2.1.1.37] [RN:R04858]	Organic Nitrogen	Amino Acid		Methionine degradation	1	M
Water_deer_Rumen-1__c281605_79	RGVC38524	K01520	dUTP pyrophosphatase [EC:3.6.1.23] [RN:R02100]	MISC	Information systems	Nucleotide	Pyrimidine deoxyribonuleotide biosynthesis, CDP/CTP => dCDP/dCTP,dTDP/dTTP	1	M
Water_deer_Rumen-1__c332_43	RGVC38535	K00789	S-adenosylmethionine synthetase [EC:2.5.1.6] [RN:R00177]	Organic Nitrogen	Amino Acid		Methionine degradation	1	M
Water_deer_Rumen-1__c51_21	RGVC38560							2	MK
Water_deer_Rumen-1__c51_229	RGVC38560							1	MK
Water_deer_Rumen-1__c51_232	RGVC38560	K21636	ribonucleoside-triphosphate reductase [EC:1.17.4.2 1.1.98.6] [RN:R02022 R11636]	MISC	Information systems	Nucleotide	Pyrimidine deoxyribonuleotide biosynthesis, CDP/CTP => dCDP/dCTP,dTDP/dTTP	1	M
Water_deer_Rumen-1__c51_235	RGVC38560	K01520	dUTP pyrophosphatase [EC:3.6.1.23] [RN:R02100]	MISC	Information systems	Nucleotide	Pyrimidine deoxyribonuleotide biosynthesis, CDP/CTP => dCDP/dCTP,dTDP/dTTP	1	M
Water_deer_Rumen-1__c51_24	RGVC38560	K21636	ribonucleoside-triphosphate reductase [EC:1.17.4.2 1.1.98.6] [RN:R02022 R11636]	MISC	Information systems	Nucleotide	Pyrimidine deoxyribonuleotide biosynthesis, CDP/CTP => dCDP/dCTP,dTDP/dTTP	2	M
Water_deer_Rumen-1__c51_266	RGVC38560							1	MK
Water_deer_Rumen-1__c51_27	RGVC38560	K01520	dUTP pyrophosphatase [EC:3.6.1.23] [RN:R02100]	MISC	Information systems	Nucleotide	Pyrimidine deoxyribonuleotide biosynthesis, CDP/CTP => dCDP/dCTP,dTDP/dTTP	2	M
Water_deer_Rumen-1__c51_297	RGVC38560							1	MK
Water_deer_Rumen-1__c51_58	RGVC38560							2	MK
Water_deer_Rumen-1__c51_89	RGVC38560							1	MK
Water_deer_Rumen-2__c232810_53	RGVC38591							1	MK
Water_deer_Rumen-2__c260_106	RGVC38595							1	M
Water_deer_Rumen-2__c260_136	RGVC38595							1	MK
Water_deer_Rumen-2__c260_171	RGVC38595							1	MK
Water_deer_Rumen-2__c260_172	RGVC38595							1	MK
Water_deer_Rumen-2__c260_252	RGVC38595							1	MK
Water_deer_Rumen-2__c260_291	RGVC38595							1	MK
Water_deer_Rumen-2__c260_304	RGVC38595	M18	Catlytic type: Metallo; acting on N-terminal leucine and most other amino acids	Organic Nitrogen	Peptidase		Metalloaminopeptidases	1	M
Water_deer_Rumen-2__c260_312	RGVC38595							1	MK
Water_deer_Rumen-2__c260_329	RGVC38595	K01939	adenylosuccinate synthase [EC:6.3.4.4] [RN:R01135]	MISC	Information systems	Nucleotide	Adenine ribonucleotide biosynthesis, IMP => ADP,ATP	1	M
Water_deer_Rumen-2__c260_333	RGVC38595							1	MK
Water_deer_Rumen-2__c260_337	RGVC38595							1	MK
Water_deer_Rumen-2__c41926_34	RGVC38621	K00558	DNA (cytosine-5-)-methyltransferase [EC:2.1.1.37] [RN:R04858]	Organic Nitrogen	Amino Acid		Methionine degradation	2	M
Water_deer_Rumen-2__c41926_62	RGVC38621							2	MK
Water_deer_Rumen-3__c182576_55	RGVC38642	K01520	dUTP pyrophosphatase [EC:3.6.1.23] [RN:R02100]	MISC	Information systems	Nucleotide	Pyrimidine deoxyribonuleotide biosynthesis, CDP/CTP => dCDP/dCTP,dTDP/dTTP	1	M
Water_deer_Rumen-4__c221954_61	RGVC38669							1	MK
Water_deer_Rumen-4__c221954_62	RGVC38669							1	MKE
Water_deer_Rumen-4__c221954_73	RGVC38669	K01520	dUTP pyrophosphatase [EC:3.6.1.23] [RN:R02100]	MISC	Information systems	Nucleotide	Pyrimidine deoxyribonuleotide biosynthesis, CDP/CTP => dCDP/dCTP,dTDP/dTTP	1	M
Water_deer_Rumen-4__c323799_7	RGVC38687	K00558	DNA (cytosine-5-)-methyltransferase [EC:2.1.1.37] [RN:R04858]	Organic Nitrogen	Amino Acid		Methionine degradation	2	MF
Water_deer_Rumen-5__c108837_1_115	RGVC38694	K00558	DNA (cytosine-5-)-methyltransferase [EC:2.1.1.37] [RN:R04858]	Organic Nitrogen	Amino Acid		Methionine degradation	2	M
Water_deer_Rumen-5__c108837_1_22	RGVC38694	K00789	S-adenosylmethionine synthetase [EC:2.5.1.6] [RN:R00177]	Organic Nitrogen	Amino Acid		Methionine degradation	2	M
Water_deer_Rumen-5__c108837_1_25	RGVC38694	K01520	dUTP pyrophosphatase [EC:3.6.1.23] [RN:R02100]	MISC	Information systems	Nucleotide	Pyrimidine deoxyribonuleotide biosynthesis, CDP/CTP => dCDP/dCTP,dTDP/dTTP	2	M
Water_deer_Rumen-5__c108837_1_87	RGVC38694	K07173	S-ribosylhomocysteine lyase [EC:4.4.1.21] [RN:R01291]	Organic Nitrogen	Amino Acid		Cysteine biosynthesis, methionine => cysteine	2	M
Water_deer_Rumen-5__c108837_1_88	RGVC38694							2	MK
Water_deer_Rumen-5__c182_136	RGVC38713							2	MK
Water_deer_Rumen-5__c182_149	RGVC38713	M18	Catlytic type: Metallo; acting on N-terminal leucine and most other amino acids	Organic Nitrogen	Peptidase		Metalloaminopeptidases	2	M
Water_deer_Rumen-5__c182_157	RGVC38713							2	MK
Water_deer_Rumen-5__c182_174	RGVC38713	K01939	adenylosuccinate synthase [EC:6.3.4.4] [RN:R01135]	MISC	Information systems	Nucleotide	Adenine ribonucleotide biosynthesis, IMP => ADP,ATP	2	M
Water_deer_Rumen-5__c182_178	RGVC38713							2	MK
Water_deer_Rumen-5__c182_182	RGVC38713							2	MK
Water_deer_Rumen-5__c182_297	RGVC38713	K21636	ribonucleoside-triphosphate reductase [EC:1.17.4.2 1.1.98.6] [RN:R02022 R11636]	MISC	Information systems	Nucleotide	Pyrimidine deoxyribonuleotide biosynthesis, CDP/CTP => dCDP/dCTP,dTDP/dTTP	1	MKE
Water_deer_Rumen-5__c182_97	RGVC38713							2	MK
Water_deer_Rumen-5__c241422_31	RGVC38725	K01520	dUTP pyrophosphatase [EC:3.6.1.23] [RN:R02100]	MISC	Information systems	Nucleotide	Pyrimidine deoxyribonuleotide biosynthesis, CDP/CTP => dCDP/dCTP,dTDP/dTTP	2	M
Water_deer_Rumen-5__c403775_171	RGVC38770							1	M
Water_deer_Rumen-5__c403775_213	RGVC38770							1	MK
Water_deer_Rumen-5__c403775_222	RGVC38770							1	MK
Water_deer_Rumen-5__c403775_52	RGVC38770	K21636	ribonucleoside-triphosphate reductase [EC:1.17.4.2 1.1.98.6] [RN:R02022 R11636]	MISC	Information systems	Nucleotide	Pyrimidine deoxyribonuleotide biosynthesis, CDP/CTP => dCDP/dCTP,dTDP/dTTP	1	M
Water_deer_Rumen-5__c403775_87	RGVC38770	K01520	dUTP pyrophosphatase [EC:3.6.1.23] [RN:R02100]	MISC	Information systems	Nucleotide	Pyrimidine deoxyribonuleotide biosynthesis, CDP/CTP => dCDP/dCTP,dTDP/dTTP	1	M
Water_deer_Rumen-5__c403775_94	RGVC38770	U69	Self-processing occurs at the Ser846|+|Ala bond.	Organic Nitrogen	Peptidase		Self-processing peptidases	1	M
Water_deer_Rumen-5__c403775_97	RGVC38770							1	MK
Water_deer_Rumen-5__c53121_36	RGVC38783							2	MK
Water_deer_Rumen-5__c75818_77	RGVC38790	K01520	dUTP pyrophosphatase [EC:3.6.1.23] [RN:R02100]	MISC	Information systems	Nucleotide	Pyrimidine deoxyribonuleotide biosynthesis, CDP/CTP => dCDP/dCTP,dTDP/dTTP	1	M
Yak_Abomasum-1__c418446_49	RGVC38817							2	MKE
Yak_Abomasum-5__c140287_100	RGVC38861	K01520	dUTP pyrophosphatase [EC:3.6.1.23] [RN:R02100]	MISC	Information systems	Nucleotide	Pyrimidine deoxyribonuleotide biosynthesis, CDP/CTP => dCDP/dCTP,dTDP/dTTP	2	M
Yak_Abomasum-5__c140287_52	RGVC38861	K01939	adenylosuccinate synthase [EC:6.3.4.4] [RN:R01135]	MISC	Information systems	Nucleotide	Adenine ribonucleotide biosynthesis, IMP => ADP,ATP	2	M
Yak_Abomasum-5__c140287_97	RGVC38861	K21636	ribonucleoside-triphosphate reductase [EC:1.17.4.2 1.1.98.6] [RN:R02022 R11636]	MISC	Information systems	Nucleotide	Pyrimidine deoxyribonuleotide biosynthesis, CDP/CTP => dCDP/dCTP,dTDP/dTTP	2	MKE
Yak_Abomasum-5__c191265_16	RGVC38863	K01520	dUTP pyrophosphatase [EC:3.6.1.23] [RN:R02100]	MISC	Information systems	Nucleotide	Pyrimidine deoxyribonuleotide biosynthesis, CDP/CTP => dCDP/dCTP,dTDP/dTTP	2	MF
Yak_Abomasum-5__c381841_79	RGVC38869	K21636	ribonucleoside-triphosphate reductase [EC:1.17.4.2 1.1.98.6] [RN:R02022 R11636]	MISC	Information systems	Nucleotide	Pyrimidine deoxyribonuleotide biosynthesis, CDP/CTP => dCDP/dCTP,dTDP/dTTP	1	M
Yak_Abomasum-5__c381841_81	RGVC38869	K01520	dUTP pyrophosphatase [EC:3.6.1.23] [RN:R02100]	MISC	Information systems	Nucleotide	Pyrimidine deoxyribonuleotide biosynthesis, CDP/CTP => dCDP/dCTP,dTDP/dTTP	1	M
Yak_Cecum-1__c478653_129	RGVC38940	K01520	dUTP pyrophosphatase [EC:3.6.1.23] [RN:R02100]	MISC	Information systems	Nucleotide	Pyrimidine deoxyribonuleotide biosynthesis, CDP/CTP => dCDP/dCTP,dTDP/dTTP	2	M
Yak_Cecum-1__c478653_192	RGVC38940							2	MK
Yak_Cecum-1__c478653_233	RGVC38940							2	MK
Yak_Cecum-1__c489951_27	RGVC38941	K00789	S-adenosylmethionine synthetase [EC:2.5.1.6] [RN:R00177]	Organic Nitrogen	Amino Acid		Methionine degradation	1	M
Yak_Cecum-1__c806888_119	RGVC39008							2	MK
Yak_Cecum-1__c806888_20	RGVC39008	K01520	dUTP pyrophosphatase [EC:3.6.1.23] [RN:R02100]	MISC	Information systems	Nucleotide	Pyrimidine deoxyribonuleotide biosynthesis, CDP/CTP => dCDP/dCTP,dTDP/dTTP	2	M
Yak_Cecum-1__c806888_24	RGVC39008							2	MK
Yak_Cecum-1__c806888_34	RGVC39008	K21636	ribonucleoside-triphosphate reductase [EC:1.17.4.2 1.1.98.6] [RN:R02022 R11636]	MISC	Information systems	Nucleotide	Pyrimidine deoxyribonuleotide biosynthesis, CDP/CTP => dCDP/dCTP,dTDP/dTTP	2	MKE
Yak_Cecum-1__c827681_11	RGVC39014							1	MK
Yak_Cecum-1__c827681_28	RGVC39014	K21636	ribonucleoside-triphosphate reductase [EC:1.17.4.2 1.1.98.6] [RN:R02022 R11636]	MISC	Information systems	Nucleotide	Pyrimidine deoxyribonuleotide biosynthesis, CDP/CTP => dCDP/dCTP,dTDP/dTTP	1	MKE
Yak_Cecum-1__c827681_52	RGVC39014	K00558	DNA (cytosine-5-)-methyltransferase [EC:2.1.1.37] [RN:R04858]	Organic Nitrogen	Amino Acid		Methionine degradation	1	M
Yak_Cecum-1__c827681_98	RGVC39014	K01520	dUTP pyrophosphatase [EC:3.6.1.23] [RN:R02100]	MISC	Information systems	Nucleotide	Pyrimidine deoxyribonuleotide biosynthesis, CDP/CTP => dCDP/dCTP,dTDP/dTTP	1	M
Yak_Cecum-2__c509371_26	RGVC39106	K01520	dUTP pyrophosphatase [EC:3.6.1.23] [RN:R02100]	MISC	Information systems	Nucleotide	Pyrimidine deoxyribonuleotide biosynthesis, CDP/CTP => dCDP/dCTP,dTDP/dTTP	2	M
Yak_Cecum-3__c1061376_1_100	RGVC39188	K21636	ribonucleoside-triphosphate reductase [EC:1.17.4.2 1.1.98.6] [RN:R02022 R11636]	MISC	Information systems	Nucleotide	Pyrimidine deoxyribonuleotide biosynthesis, CDP/CTP => dCDP/dCTP,dTDP/dTTP	1	MKE
Yak_Cecum-3__c1061376_1_133	RGVC39188							1	MK
Yak_Cecum-3__c1061376_1_134	RGVC39188							1	MK
Yak_Cecum-3__c1061376_1_138	RGVC39188	K00558	DNA (cytosine-5-)-methyltransferase [EC:2.1.1.37] [RN:R04858]	Organic Nitrogen	Amino Acid		Methionine degradation	1	M
Yak_Cecum-3__c1061376_1_139	RGVC39188	K00558	DNA (cytosine-5-)-methyltransferase [EC:2.1.1.37] [RN:R04858]	Organic Nitrogen	Amino Acid		Methionine degradation	1	M
Yak_Cecum-3__c1061376_1_153	RGVC39188	K00789	S-adenosylmethionine synthetase [EC:2.5.1.6] [RN:R00177]	Organic Nitrogen	Amino Acid		Methionine degradation	1	M
Yak_Cecum-3__c1061376_1_281	RGVC39188	K01520	dUTP pyrophosphatase [EC:3.6.1.23] [RN:R02100]	MISC	Information systems	Nucleotide	Pyrimidine deoxyribonuleotide biosynthesis, CDP/CTP => dCDP/dCTP,dTDP/dTTP	1	M
Yak_Cecum-3__c1172314_76	RGVC39192	K00789	S-adenosylmethionine synthetase [EC:2.5.1.6] [RN:R00177]	Organic Nitrogen	Amino Acid		Methionine degradation	1	M
Yak_Cecum-3__c169556_22	RGVC39210	K01520	dUTP pyrophosphatase [EC:3.6.1.23] [RN:R02100]	MISC	Information systems	Nucleotide	Pyrimidine deoxyribonuleotide biosynthesis, CDP/CTP => dCDP/dCTP,dTDP/dTTP	2	M
Yak_Cecum-3__c295460_10	RGVC39218	K01520	dUTP pyrophosphatase [EC:3.6.1.23] [RN:R02100]	MISC	Information systems	Nucleotide	Pyrimidine deoxyribonuleotide biosynthesis, CDP/CTP => dCDP/dCTP,dTDP/dTTP	2	M
Yak_Cecum-3__c295460_2	RGVC39218							2	MKF
Yak_Cecum-3__c295460_22	RGVC39218							2	MK
Yak_Cecum-3__c295460_24	RGVC39218							2	MK
Yak_Cecum-3__c295460_25	RGVC39218							2	MK
Yak_Cecum-3__c295460_3	RGVC39218	K21636	ribonucleoside-triphosphate reductase [EC:1.17.4.2 1.1.98.6] [RN:R02022 R11636]	MISC	Information systems	Nucleotide	Pyrimidine deoxyribonuleotide biosynthesis, CDP/CTP => dCDP/dCTP,dTDP/dTTP	2	MKEF
Yak_Cecum-4__c337000_100	RGVC39309							1	MK
Yak_Cecum-4__c337000_107	RGVC39309							1	MK
Yak_Cecum-4__c337000_153	RGVC39309							1	MK
Yak_Cecum-4__c337000_59	RGVC39309	K01520	dUTP pyrophosphatase [EC:3.6.1.23] [RN:R02100]	MISC	Information systems	Nucleotide	Pyrimidine deoxyribonuleotide biosynthesis, CDP/CTP => dCDP/dCTP,dTDP/dTTP	1	M
Yak_Cecum-4__c337000_61	RGVC39309	K21636	ribonucleoside-triphosphate reductase [EC:1.17.4.2 1.1.98.6] [RN:R02022 R11636]	MISC	Information systems	Nucleotide	Pyrimidine deoxyribonuleotide biosynthesis, CDP/CTP => dCDP/dCTP,dTDP/dTTP	1	MKE
Yak_Cecum-4__c337000_96	RGVC39309	K01491	methylenetetrahydrofolate dehydrogenase (NADP+) / methenyltetrahydrofolate cyclohydrolase [EC:1.5.1.5 3.5.4.9] [RN:R01655 R01220]	Energy	C1		Reductive acetyl-CoA pathway (Wood-Ljungdahl pathway)	1	MK
Yak_Cecum-4__c355670_12	RGVC39312	K01520	dUTP pyrophosphatase [EC:3.6.1.23] [RN:R02100]	MISC	Information systems	Nucleotide	Pyrimidine deoxyribonuleotide biosynthesis, CDP/CTP => dCDP/dCTP,dTDP/dTTP	2	M
Yak_Cecum-4__c355670_163	RGVC39312							1	MK
Yak_Cecum-4__c355670_26	RGVC39312							2	MK
Yak_Cecum-4__c355670_9	RGVC39312	K21636	ribonucleoside-triphosphate reductase [EC:1.17.4.2 1.1.98.6] [RN:R02022 R11636]	MISC	Information systems	Nucleotide	Pyrimidine deoxyribonuleotide biosynthesis, CDP/CTP => dCDP/dCTP,dTDP/dTTP	2	MF
Yak_Cecum-4__c553527_48	RGVC39342	K01520	dUTP pyrophosphatase [EC:3.6.1.23] [RN:R02100]	MISC	Information systems	Nucleotide	Pyrimidine deoxyribonuleotide biosynthesis, CDP/CTP => dCDP/dCTP,dTDP/dTTP	2	M
Yak_Cecum-4__c553527_53	RGVC39342	K21636	ribonucleoside-triphosphate reductase [EC:1.17.4.2 1.1.98.6] [RN:R02022 R11636]	MISC	Information systems	Nucleotide	Pyrimidine deoxyribonuleotide biosynthesis, CDP/CTP => dCDP/dCTP,dTDP/dTTP	2	MKE
Yak_Cecum-5__c166157_67	RGVC39365	K01520	dUTP pyrophosphatase [EC:3.6.1.23] [RN:R02100]	MISC	Information systems	Nucleotide	Pyrimidine deoxyribonuleotide biosynthesis, CDP/CTP => dCDP/dCTP,dTDP/dTTP	2	M
Yak_Colon-2__c243048_38	RGVC39431							2	MK
Yak_Colon-2__c516101_17	RGVC39460							2	MK
Yak_Colon-2__c516101_44	RGVC39460	K00789	S-adenosylmethionine synthetase [EC:2.5.1.6] [RN:R00177]	Organic Nitrogen	Amino Acid		Methionine degradation	2	M
Yak_Colon-3__c165509_75	RGVC39509	K01520	dUTP pyrophosphatase [EC:3.6.1.23] [RN:R02100]	MISC	Information systems	Nucleotide	Pyrimidine deoxyribonuleotide biosynthesis, CDP/CTP => dCDP/dCTP,dTDP/dTTP	2	M
Yak_Colon-3__c200418_36	RGVC39516	K00789	S-adenosylmethionine synthetase [EC:2.5.1.6] [RN:R00177]	Organic Nitrogen	Amino Acid		Methionine degradation	1	M
Yak_Colon-3__c428101_7	RGVC39530	K01520	dUTP pyrophosphatase [EC:3.6.1.23] [RN:R02100]	MISC	Information systems	Nucleotide	Pyrimidine deoxyribonuleotide biosynthesis, CDP/CTP => dCDP/dCTP,dTDP/dTTP	2	MF
Yak_Colon-3__c639124_67	RGVC39559	K00558	DNA (cytosine-5-)-methyltransferase [EC:2.1.1.37] [RN:R04858]	Organic Nitrogen	Amino Acid		Methionine degradation	2	MF
Yak_Colon-3__c639124_7	RGVC39559							2	MKF
Yak_Colon-3__c823153_216	RGVC39579	K00174	2-oxoglutarate:ferredoxin oxidoreductase [EC:1.2.7.3] [RN:R01197]	Energy	C1		Reductive citrate cycle (Arnon-Buchanan cycle)	1	M
Yak_Colon-3__c823153_217	RGVC39579	K00175	2-oxoglutarate:ferredoxin oxidoreductase [EC:1.2.7.3] [RN:R01197]	Energy	C1		Reductive citrate cycle (Arnon-Buchanan cycle)	1	M
Yak_Colon-3__c823153_243	RGVC39579							1	MK
Yak_Colon-3__c823153_248	RGVC39579	K02437	glycine cleavage system [RN:R01221]	Energy	Photosynthesis		Photorespiration	1	MK
Yak_Colon-4__c732143_74	RGVC39619	K01520	dUTP pyrophosphatase [EC:3.6.1.23] [RN:R02100]	MISC	Information systems	Nucleotide	Pyrimidine deoxyribonuleotide biosynthesis, CDP/CTP => dCDP/dCTP,dTDP/dTTP	2	MF
Yak_Duodenum-1__c257594_112	RGVC39873							2	MF
Yak_Duodenum-1__c351613_31	RGVC40018	K00558	DNA (cytosine-5-)-methyltransferase [EC:2.1.1.37] [RN:R04858]	Organic Nitrogen	Amino Acid		Methionine degradation	2	M
Yak_Duodenum-1__c362936_22	RGVC40037	K00558	DNA (cytosine-5-)-methyltransferase [EC:2.1.1.37] [RN:R04858]	Organic Nitrogen	Amino Acid		Methionine degradation	2	M
Yak_Duodenum-1__c61032_23	RGVC40171							2	MK
Yak_Duodenum-3__c183910_13	RGVC40410	K01520	dUTP pyrophosphatase [EC:3.6.1.23] [RN:R02100]	MISC	Information systems	Nucleotide	Pyrimidine deoxyribonuleotide biosynthesis, CDP/CTP => dCDP/dCTP,dTDP/dTTP	2	M
Yak_Duodenum-3__c183910_16	RGVC40410	K21636	ribonucleoside-triphosphate reductase [EC:1.17.4.2 1.1.98.6] [RN:R02022 R11636]	MISC	Information systems	Nucleotide	Pyrimidine deoxyribonuleotide biosynthesis, CDP/CTP => dCDP/dCTP,dTDP/dTTP	2	MKE
Yak_Jejunum-5__c123913_41	RGVC41129	K01520	dUTP pyrophosphatase [EC:3.6.1.23] [RN:R02100]	MISC	Information systems	Nucleotide	Pyrimidine deoxyribonuleotide biosynthesis, CDP/CTP => dCDP/dCTP,dTDP/dTTP	2	M
Yak_Jejunum-5__c155_12	RGVC41222							2	M
Yak_Jejunum-5__c155_232	RGVC41222	K01520	dUTP pyrophosphatase [EC:3.6.1.23] [RN:R02100]	MISC	Information systems	Nucleotide	Pyrimidine deoxyribonuleotide biosynthesis, CDP/CTP => dCDP/dCTP,dTDP/dTTP	1	M
Yak_Jejunum-5__c155_250	RGVC41222							2	MK
Yak_Jejunum-5__c192950_60	RGVC41328	K01494	dCTP deaminase [EC:3.5.4.13] [RN:R02325]	MISC	Information systems	Nucleotide	Pyrimidine deoxyribonuleotide biosynthesis, CDP/CTP => dCDP/dCTP,dTDP/dTTP	1	M
Yak_Jejunum-5__c217101_22	RGVC41389							1	MK
Yak_Jejunum-5__c217101_24	RGVC41389	K21636	ribonucleoside-triphosphate reductase [EC:1.17.4.2 1.1.98.6] [RN:R02022 R11636]	MISC	Information systems	Nucleotide	Pyrimidine deoxyribonuleotide biosynthesis, CDP/CTP => dCDP/dCTP,dTDP/dTTP	1	M
Yak_Jejunum-5__c217101_29	RGVC41389	K01520	dUTP pyrophosphatase [EC:3.6.1.23] [RN:R02100]	MISC	Information systems	Nucleotide	Pyrimidine deoxyribonuleotide biosynthesis, CDP/CTP => dCDP/dCTP,dTDP/dTTP	1	M
Yak_Jejunum-5__c297997_221	RGVC41572	K01520	dUTP pyrophosphatase [EC:3.6.1.23] [RN:R02100]	MISC	Information systems	Nucleotide	Pyrimidine deoxyribonuleotide biosynthesis, CDP/CTP => dCDP/dCTP,dTDP/dTTP	2	M
Yak_Jejunum-5__c371347_18	RGVC41741	K00560	thymidylate synthase [EC:2.1.1.45] [RN:R02101]	MISC	Information systems	Nucleotide	Pyrimidine deoxyribonuleotide biosynthesis, CDP/CTP => dCDP/dCTP,dTDP/dTTP	2	M
Yak_Jejunum-5__c53169_135	RGVC41795							1	MK
Yak_Jejunum-5__c53169_5	RGVC41795	K21636	ribonucleoside-triphosphate reductase [EC:1.17.4.2 1.1.98.6] [RN:R02022 R11636]	MISC	Information systems	Nucleotide	Pyrimidine deoxyribonuleotide biosynthesis, CDP/CTP => dCDP/dCTP,dTDP/dTTP	2	MKEF
Yak_Jejunum-5__c53169_65	RGVC41795							1	MK
Yak_Jejunum-5__c53169_66	RGVC41795	K01520	dUTP pyrophosphatase [EC:3.6.1.23] [RN:R02100]	MISC	Information systems	Nucleotide	Pyrimidine deoxyribonuleotide biosynthesis, CDP/CTP => dCDP/dCTP,dTDP/dTTP	1	M
Yak_Jejunum-5__c53169_74	RGVC41795							1	MK
Yak_Jejunum-5__c97634_57	RGVC41906	K00943	dTMP kinase [EC:2.7.4.9] [RN:R02094]	MISC	Information systems	Nucleotide	Pyrimidine deoxyribonuleotide biosynthesis, CDP/CTP => dCDP/dCTP,dTDP/dTTP	1	M
Yak_Omasum-2__c3_57	RGVC41954	K00558	DNA (cytosine-5-)-methyltransferase [EC:2.1.1.37] [RN:R04858]	Organic Nitrogen	Amino Acid		Methionine degradation	2	M
Yak_Omasum-3__c16_25	RGVC41998							1	M
Yak_Omasum-5__c435486_36	RGVC42116	K01494	dCTP deaminase [EC:3.5.4.13] [RN:R02325]	MISC	Information systems	Nucleotide	Pyrimidine deoxyribonuleotide biosynthesis, CDP/CTP => dCDP/dCTP,dTDP/dTTP	1	M
Yak_Omasum-5__c739048_31	RGVC42148	K01520	dUTP pyrophosphatase [EC:3.6.1.23] [RN:R02100]	MISC	Information systems	Nucleotide	Pyrimidine deoxyribonuleotide biosynthesis, CDP/CTP => dCDP/dCTP,dTDP/dTTP	2	M
Yak_Omasum-5__c739048_66	RGVC42148	K21636	ribonucleoside-triphosphate reductase [EC:1.17.4.2 1.1.98.6] [RN:R02022 R11636]	MISC	Information systems	Nucleotide	Pyrimidine deoxyribonuleotide biosynthesis, CDP/CTP => dCDP/dCTP,dTDP/dTTP	2	M
Yak_Rectum-1__c272784_38	RGVC42245							1	MK
Yak_Rectum-1__c272784_7	RGVC42245	K04069	pyruvate formate lyase activating enzyme	carbon utilization	pyruvate metabolism		pyruvate metabolism	2	M
Yak_Rectum-1__c461648_50	RGVC42283	K01520	dUTP pyrophosphatase [EC:3.6.1.23] [RN:R02100]	MISC	Information systems	Nucleotide	Pyrimidine deoxyribonuleotide biosynthesis, CDP/CTP => dCDP/dCTP,dTDP/dTTP	1	M
Yak_Rectum-1__c461648_52	RGVC42283	K21636	ribonucleoside-triphosphate reductase [EC:1.17.4.2 1.1.98.6] [RN:R02022 R11636]	MISC	Information systems	Nucleotide	Pyrimidine deoxyribonuleotide biosynthesis, CDP/CTP => dCDP/dCTP,dTDP/dTTP	1	MKE
Yak_Rectum-1__c461648_55	RGVC42283							1	MK
Yak_Rectum-1__c619376_134	RGVC42326							1	MK
Yak_Rectum-1__c619376_152	RGVC42326	K21636	ribonucleoside-triphosphate reductase [EC:1.17.4.2 1.1.98.6] [RN:R02022 R11636]	MISC	Information systems	Nucleotide	Pyrimidine deoxyribonuleotide biosynthesis, CDP/CTP => dCDP/dCTP,dTDP/dTTP	1	MKE
Yak_Rectum-1__c619376_159	RGVC42326	K01520	dUTP pyrophosphatase [EC:3.6.1.23] [RN:R02100]	MISC	Information systems	Nucleotide	Pyrimidine deoxyribonuleotide biosynthesis, CDP/CTP => dCDP/dCTP,dTDP/dTTP	1	M
Yak_Rectum-1__c913757_105	RGVC42386	K01520	dUTP pyrophosphatase [EC:3.6.1.23] [RN:R02100]	MISC	Information systems	Nucleotide	Pyrimidine deoxyribonuleotide biosynthesis, CDP/CTP => dCDP/dCTP,dTDP/dTTP	1	M
Yak_Rectum-1__c913757_198	RGVC42386							2	MK
Yak_Rectum-1__c913757_50	RGVC42386							2	MK
Yak_Rectum-1__c913757_65	RGVC42386							2	MK
Yak_Rectum-1__c913757_98	RGVC42386							1	MK
Yak_Rectum-1__c913757_99	RGVC42386	K21636	ribonucleoside-triphosphate reductase [EC:1.17.4.2 1.1.98.6] [RN:R02022 R11636]	MISC	Information systems	Nucleotide	Pyrimidine deoxyribonuleotide biosynthesis, CDP/CTP => dCDP/dCTP,dTDP/dTTP	1	MKE
Yak_Rectum-4__c120790_25	RGVC42544	K21636	ribonucleoside-triphosphate reductase [EC:1.17.4.2 1.1.98.6] [RN:R02022 R11636]	MISC	Information systems	Nucleotide	Pyrimidine deoxyribonuleotide biosynthesis, CDP/CTP => dCDP/dCTP,dTDP/dTTP	1	M
Yak_Rectum-5__c557544_15	RGVC42853							1	M
Yak_Rectum-5__c557544_75	RGVC42853	K01520	dUTP pyrophosphatase [EC:3.6.1.23] [RN:R02100]	MISC	Information systems	Nucleotide	Pyrimidine deoxyribonuleotide biosynthesis, CDP/CTP => dCDP/dCTP,dTDP/dTTP	2	M
Yak_Rectum-5__c557544_78	RGVC42853	K01939	adenylosuccinate synthase [EC:6.3.4.4] [RN:R01135]	MISC	Information systems	Nucleotide	Adenine ribonucleotide biosynthesis, IMP => ADP,ATP	2	M
Yak_Rectum-5__c570027_10	RGVC42864	K21636	ribonucleoside-triphosphate reductase [EC:1.17.4.2 1.1.98.6] [RN:R02022 R11636]	MISC	Information systems	Nucleotide	Pyrimidine deoxyribonuleotide biosynthesis, CDP/CTP => dCDP/dCTP,dTDP/dTTP	2	MKE
Yak_Rectum-5__c570027_155	RGVC42864							2	MK
Yak_Rectum-5__c570027_16	RGVC42864	K01520	dUTP pyrophosphatase [EC:3.6.1.23] [RN:R02100]	MISC	Information systems	Nucleotide	Pyrimidine deoxyribonuleotide biosynthesis, CDP/CTP => dCDP/dCTP,dTDP/dTTP	2	M
Yak_Rectum-5__c570027_50	RGVC42864							2	MK
Yak_Rectum-5__c570027_9	RGVC42864							2	MK
Yak_Rectum-5__c815351_112	RGVC42903	K01520	dUTP pyrophosphatase [EC:3.6.1.23] [RN:R02100]	MISC	Information systems	Nucleotide	Pyrimidine deoxyribonuleotide biosynthesis, CDP/CTP => dCDP/dCTP,dTDP/dTTP	2	M
Yak_Rectum-5__c815351_8	RGVC42903							2	MK
Yak_Rectum-5__c931207_93	RGVC42921	K21636	ribonucleoside-triphosphate reductase [EC:1.17.4.2 1.1.98.6] [RN:R02022 R11636]	MISC	Information systems	Nucleotide	Pyrimidine deoxyribonuleotide biosynthesis, CDP/CTP => dCDP/dCTP,dTDP/dTTP	2	MF
Yak_Rumen-1__c2092860_52	RGVC43083	K01520	dUTP pyrophosphatase [EC:3.6.1.23] [RN:R02100]	MISC	Information systems	Nucleotide	Pyrimidine deoxyribonuleotide biosynthesis, CDP/CTP => dCDP/dCTP,dTDP/dTTP	2	M
Yak_Rumen-1__c655298_17	RGVC43135	K00558	DNA (cytosine-5-)-methyltransferase [EC:2.1.1.37] [RN:R04858]	Organic Nitrogen	Amino Acid		Methionine degradation	2	M
Yak_Rumen-1__c655298_64	RGVC43135	K01810	glucose-6-phosphate isomerase [EC:5.3.1.9] [RN:R02740]	carbon utilization	central carbon	glycolysis	Glycolysis (Embden-Meyerhof pathway), glucose => pyruvate	1	M
Yak_Rumen-1__c792685_66	RGVC43143							2	MK
Yak_Rumen-1__c792685_97	RGVC43143	K21636	ribonucleoside-triphosphate reductase [EC:1.17.4.2 1.1.98.6] [RN:R02022 R11636]	MISC	Information systems	Nucleotide	Pyrimidine deoxyribonuleotide biosynthesis, CDP/CTP => dCDP/dCTP,dTDP/dTTP	2	M
Yak_Rumen-1__c792685_99	RGVC43143							2	MK
Yak_Rumen-2__c1292443_50	RGVC43200	K00558	DNA (cytosine-5-)-methyltransferase [EC:2.1.1.37] [RN:R04858]	Organic Nitrogen	Amino Acid		Methionine degradation	2	M
Yak_Rumen-2__c780842_51	RGVC43322	K00789	S-adenosylmethionine synthetase [EC:2.5.1.6] [RN:R00177]	Organic Nitrogen	Amino Acid		Methionine degradation	2	M
Yak_Rumen-3__c1167782_109	RGVC43361							1	MK
Yak_Rumen-3__c1167782_137	RGVC43361	K02406	flagellin	MISC	Flagella Structure		Flagellar Assembly	2	M
Yak_Rumen-3__c1167782_141	RGVC43361	K21636	ribonucleoside-triphosphate reductase [EC:1.17.4.2 1.1.98.6] [RN:R02022 R11636]	MISC	Information systems	Nucleotide	Pyrimidine deoxyribonuleotide biosynthesis, CDP/CTP => dCDP/dCTP,dTDP/dTTP	2	MKE
Yak_Rumen-3__c1167782_145	RGVC43361	K01520	dUTP pyrophosphatase [EC:3.6.1.23] [RN:R02100]	MISC	Information systems	Nucleotide	Pyrimidine deoxyribonuleotide biosynthesis, CDP/CTP => dCDP/dCTP,dTDP/dTTP	2	M
Yak_Rumen-3__c176117_119	RGVC43391	K21636	ribonucleoside-triphosphate reductase [EC:1.17.4.2 1.1.98.6] [RN:R02022 R11636]	MISC	Information systems	Nucleotide	Pyrimidine deoxyribonuleotide biosynthesis, CDP/CTP => dCDP/dCTP,dTDP/dTTP	2	M
Yak_Rumen-3__c176117_80	RGVC43391							2	MK
Yak_Rumen-3__c2490561_67	RGVC43420	K21636	ribonucleoside-triphosphate reductase [EC:1.17.4.2 1.1.98.6] [RN:R02022 R11636]	MISC	Information systems	Nucleotide	Pyrimidine deoxyribonuleotide biosynthesis, CDP/CTP => dCDP/dCTP,dTDP/dTTP	3	MKE
Yak_Rumen-3__c2490561_73	RGVC43420	K01520	dUTP pyrophosphatase [EC:3.6.1.23] [RN:R02100]	MISC	Information systems	Nucleotide	Pyrimidine deoxyribonuleotide biosynthesis, CDP/CTP => dCDP/dCTP,dTDP/dTTP	3	M
Yak_Rumen-3__c879536_86	RGVC43461	K00558	DNA (cytosine-5-)-methyltransferase [EC:2.1.1.37] [RN:R04858]	Organic Nitrogen	Amino Acid		Methionine degradation	2	M
Yak_Rumen-4__c224782_109	RGVC43607	K02911	large subunit ribosomal protein L32	MISC	Information systems		Ribosome, bacteria	2	M
Yak_Rumen-4__c224782_45	RGVC43607	M26	Catlytic type: Metallo; cleaves the heavy chain of human IgA1 at the Pro227-Thr228 bond; tightly associated with the bacterial cell surface	Organic Nitrogen	Peptidase		Endopeptidases	2	M
Yak_Rumen-4__c282744_128	RGVC43627							1	MK
Yak_Rumen-4__c282744_167	RGVC43627	K00789	S-adenosylmethionine synthetase [EC:2.5.1.6] [RN:R00177]	Organic Nitrogen	Amino Acid		Methionine degradation	1	M
Yak_Rumen-4__c282744_180	RGVC43627							1	MK
Yak_Rumen-4__c282744_187	RGVC43627							1	MK
Yak_Rumen-4__c282744_242	RGVC43627	K04069	pyruvate formate lyase activating enzyme	carbon utilization	pyruvate metabolism		pyruvate metabolism	1	M
Yak_Rumen-4__c282744_243	RGVC43627	K21636	ribonucleoside-triphosphate reductase [EC:1.17.4.2 1.1.98.6] [RN:R02022 R11636]	MISC	Information systems	Nucleotide	Pyrimidine deoxyribonuleotide biosynthesis, CDP/CTP => dCDP/dCTP,dTDP/dTTP	1	MKE
Yak_Rumen-4__c419907_1_111	RGVC43651	K01520	dUTP pyrophosphatase [EC:3.6.1.23] [RN:R02100]	MISC	Information systems	Nucleotide	Pyrimidine deoxyribonuleotide biosynthesis, CDP/CTP => dCDP/dCTP,dTDP/dTTP	2	M
Yak_Rumen-4__c93451_5	RGVC43712	K00558	DNA (cytosine-5-)-methyltransferase [EC:2.1.1.37] [RN:R04858]	Organic Nitrogen	Amino Acid		Methionine degradation	2	MF
Yak_Rumen-5__c1187341_111	RGVC43735							1	MK
Yak_Rumen-5__c1187341_136	RGVC43735							1	MK
Yak_Rumen-5__c1187341_16	RGVC43735							2	MK
Yak_Rumen-5__c1187341_25	RGVC43735	K01520	dUTP pyrophosphatase [EC:3.6.1.23] [RN:R02100]	MISC	Information systems	Nucleotide	Pyrimidine deoxyribonuleotide biosynthesis, CDP/CTP => dCDP/dCTP,dTDP/dTTP	2	M
Yak_Rumen-5__c118869_14	RGVC43737	K00558	DNA (cytosine-5-)-methyltransferase [EC:2.1.1.37] [RN:R04858]	Organic Nitrogen	Amino Acid		Methionine degradation	2	M
Yak_Rumen-5__c123080_33	RGVC43744	K00789	S-adenosylmethionine synthetase [EC:2.5.1.6] [RN:R00177]	Organic Nitrogen	Amino Acid		Methionine degradation	2	MF
Yak_Rumen-5__c144432_29	RGVC43799	K00558	DNA (cytosine-5-)-methyltransferase [EC:2.1.1.37] [RN:R04858]	Organic Nitrogen	Amino Acid		Methionine degradation	1	M
Yak_Rumen-5__c280166_150	RGVC43888	K01520	dUTP pyrophosphatase [EC:3.6.1.23] [RN:R02100]	MISC	Information systems	Nucleotide	Pyrimidine deoxyribonuleotide biosynthesis, CDP/CTP => dCDP/dCTP,dTDP/dTTP	1	M
Yak_Rumen-5__c280166_22	RGVC43888						methionine degradation	1	MK
Yak_Rumen-5__c432063_36	RGVC43907	K01520	dUTP pyrophosphatase [EC:3.6.1.23] [RN:R02100]	MISC	Information systems	Nucleotide	Pyrimidine deoxyribonuleotide biosynthesis, CDP/CTP => dCDP/dCTP,dTDP/dTTP	3	M
Yak_Rumen-5__c432063_41	RGVC43907	K21636	ribonucleoside-triphosphate reductase [EC:1.17.4.2 1.1.98.6] [RN:R02022 R11636]	MISC	Information systems	Nucleotide	Pyrimidine deoxyribonuleotide biosynthesis, CDP/CTP => dCDP/dCTP,dTDP/dTTP	3	MKE
Yak_Rumen-5__c432063_83	RGVC43907	K01939	adenylosuccinate synthase [EC:6.3.4.4] [RN:R01135]	MISC	Information systems	Nucleotide	Adenine ribonucleotide biosynthesis, IMP => ADP,ATP	3	M
Yak_Rumen-5__c62586_11	RGVC43939	K02073	ABC.MET.S; D-methionine transport system substrate-binding protein	Transporters			D-Methionine transport system	1	M
Yak_Rumen-5__c62586_12	RGVC43939	K02072	ABC.MET.P; D-methionine transport system permease protein	Transporters			D-Methionine transport system	1	M
Yak_Rumen-5__c62586_16	RGVC43939	K00558	DNA (cytosine-5-)-methyltransferase [EC:2.1.1.37] [RN:R04858]	Organic Nitrogen	Amino Acid		Methionine degradation	1	M
Yak_Rumen-5__c62586_29	RGVC43939	K00558	DNA (cytosine-5-)-methyltransferase [EC:2.1.1.37] [RN:R04858]	Organic Nitrogen	Amino Acid		Methionine degradation	1	M
Yak_Rumen-5__c62586_9	RGVC43939	K00789	S-adenosylmethionine synthetase [EC:2.5.1.6] [RN:R00177]	Organic Nitrogen	Amino Acid		Methionine degradation	1	M

## Sheet: Table S23
Table S23. AMGs with KEGG Orthology (KO) annotations
Gene	Genome	Entry	Category1	Category2	Category3	Pathway	Description
2022NBT-10190_1_27	RGVC30	K00558	1. Metabolism	1.5 Amino acid metabolism	Cysteine and methionine metabolism	ko00270	DNMT1, dcm; DNA (cytosine-5)-methyltransferase 1 [EC:2.1.1.37]
2022NBT-10190_1_27	RGVC30	K00558	1. Metabolism	1.0 Global and overview maps	Metabolic pathways	ko01100	DNMT1, dcm; DNA (cytosine-5)-methyltransferase 1 [EC:2.1.1.37]
2022NBT-10190_1_27	RGVC30	K00558	6. Human Diseases	6.1 Cancer: overview	MicroRNAs in cancer	ko05206	DNMT1, dcm; DNA (cytosine-5)-methyltransferase 1 [EC:2.1.1.37]
2022NBT-10281_260	RGVC46	K03462	1. Metabolism	1.8 Metabolism of cofactors and vitamins	Nicotinate and nicotinamide metabolism	ko00760	NAMPT; nicotinamide phosphoribosyltransferase [EC:2.4.2.12]
2022NBT-10281_260	RGVC46	K03462	1. Metabolism	1.0 Global and overview maps	Metabolic pathways	ko01100	NAMPT; nicotinamide phosphoribosyltransferase [EC:2.4.2.12]
2022NBT-10281_260	RGVC46	K03462	5. Organismal Systems	5.1 Immune system	NOD-like receptor signaling pathway	ko04621	NAMPT; nicotinamide phosphoribosyltransferase [EC:2.4.2.12]
2022NBT-10281_27	RGVC46	K01520	1. Metabolism	1.4 Nucleotide metabolism	Pyrimidine metabolism	ko00240	dut, DUT; dUTP pyrophosphatase [EC:3.6.1.23]
2022NBT-10281_27	RGVC46	K01520	1. Metabolism	1.11 Xenobiotics biodegradation and metabolism	Drug metabolism - other enzymes	ko00983	dut, DUT; dUTP pyrophosphatase [EC:3.6.1.23]
2022NBT-10281_27	RGVC46	K01520	1. Metabolism	1.0 Global and overview maps	Metabolic pathways	ko01100	dut, DUT; dUTP pyrophosphatase [EC:3.6.1.23]
2022NBT-10288_123	RGVC48	K00703	1. Metabolism	1.1 Carbohydrate metabolism	Starch and sucrose metabolism	ko00500	glgA; starch synthase [EC:2.4.1.21]
2022NBT-10288_123	RGVC48	K00703	1. Metabolism	1.0 Global and overview maps	Metabolic pathways	ko01100	glgA; starch synthase [EC:2.4.1.21]
2022NBT-10288_123	RGVC48	K00703	1. Metabolism	1.0 Global and overview maps	Biosynthesis of secondary metabolites	ko01110	glgA; starch synthase [EC:2.4.1.21]
2022NBT-10288_123	RGVC48	K00703	4. Cellular Processes	4.4 Cellular community - prokaryotes	Biofilm formation - Escherichia coli	ko02026	glgA; starch synthase [EC:2.4.1.21]
2022NBT-10288_133	RGVC48	K01218	1. Metabolism	1.1 Carbohydrate metabolism	Fructose and mannose metabolism	ko00051	gmuG; mannan endo-1,4-beta-mannosidase [EC:3.2.1.78]
2022NBT-10288_133	RGVC48	K01218	1. Metabolism	1.0 Global and overview maps	Metabolic pathways	ko01100	gmuG; mannan endo-1,4-beta-mannosidase [EC:3.2.1.78]
2022NBT-10288_133	RGVC48	K01218	4. Cellular Processes	4.4 Cellular community - prokaryotes	Quorum sensing	ko02024	gmuG; mannan endo-1,4-beta-mannosidase [EC:3.2.1.78]
2022NBT-10288_141	RGVC48	K00558	1. Metabolism	1.5 Amino acid metabolism	Cysteine and methionine metabolism	ko00270	DNMT1, dcm; DNA (cytosine-5)-methyltransferase 1 [EC:2.1.1.37]
2022NBT-10288_141	RGVC48	K00558	1. Metabolism	1.0 Global and overview maps	Metabolic pathways	ko01100	DNMT1, dcm; DNA (cytosine-5)-methyltransferase 1 [EC:2.1.1.37]
2022NBT-10288_141	RGVC48	K00558	6. Human Diseases	6.1 Cancer: overview	MicroRNAs in cancer	ko05206	DNMT1, dcm; DNA (cytosine-5)-methyltransferase 1 [EC:2.1.1.37]
2022NBT-10321_113	RGVC52	K00560	1. Metabolism	1.4 Nucleotide metabolism	Pyrimidine metabolism	ko00240	thyA, TYMS; thymidylate synthase [EC:2.1.1.45]
2022NBT-10321_113	RGVC52	K00560	1. Metabolism	1.8 Metabolism of cofactors and vitamins	One carbon pool by folate	ko00670	thyA, TYMS; thymidylate synthase [EC:2.1.1.45]
2022NBT-10321_113	RGVC52	K00560	1. Metabolism	1.0 Global and overview maps	Metabolic pathways	ko01100	thyA, TYMS; thymidylate synthase [EC:2.1.1.45]
2022NBT-10321_113	RGVC52	K00560	6. Human Diseases	6.12 Drug resistance: antineoplastic	Antifolate resistance	ko01523	thyA, TYMS; thymidylate synthase [EC:2.1.1.45]
2022NBT-10321_146	RGVC52	K03462	1. Metabolism	1.8 Metabolism of cofactors and vitamins	Nicotinate and nicotinamide metabolism	ko00760	NAMPT; nicotinamide phosphoribosyltransferase [EC:2.4.2.12]
2022NBT-10321_146	RGVC52	K03462	1. Metabolism	1.0 Global and overview maps	Metabolic pathways	ko01100	NAMPT; nicotinamide phosphoribosyltransferase [EC:2.4.2.12]
2022NBT-10321_146	RGVC52	K03462	5. Organismal Systems	5.1 Immune system	NOD-like receptor signaling pathway	ko04621	NAMPT; nicotinamide phosphoribosyltransferase [EC:2.4.2.12]
2022NBT-10321_82	RGVC52	K01520	1. Metabolism	1.4 Nucleotide metabolism	Pyrimidine metabolism	ko00240	dut, DUT; dUTP pyrophosphatase [EC:3.6.1.23]
2022NBT-10321_82	RGVC52	K01520	1. Metabolism	1.11 Xenobiotics biodegradation and metabolism	Drug metabolism - other enzymes	ko00983	dut, DUT; dUTP pyrophosphatase [EC:3.6.1.23]
2022NBT-10321_82	RGVC52	K01520	1. Metabolism	1.0 Global and overview maps	Metabolic pathways	ko01100	dut, DUT; dUTP pyrophosphatase [EC:3.6.1.23]
2022NBT-10354_1_25	RGVC57	K00558	1. Metabolism	1.5 Amino acid metabolism	Cysteine and methionine metabolism	ko00270	DNMT1, dcm; DNA (cytosine-5)-methyltransferase 1 [EC:2.1.1.37]
2022NBT-10354_1_25	RGVC57	K00558	1. Metabolism	1.0 Global and overview maps	Metabolic pathways	ko01100	DNMT1, dcm; DNA (cytosine-5)-methyltransferase 1 [EC:2.1.1.37]
2022NBT-10354_1_25	RGVC57	K00558	6. Human Diseases	6.1 Cancer: overview	MicroRNAs in cancer	ko05206	DNMT1, dcm; DNA (cytosine-5)-methyltransferase 1 [EC:2.1.1.37]
2022NBT-10800_1_140	RGVC140	K00728	1. Metabolism	1.7 Glycan biosynthesis and metabolism	Other types of O-glycan biosynthesis	ko00514	POMT, pmt; dolichyl-phosphate-mannose-protein mannosyltransferase [EC:2.4.1.109]
2022NBT-10800_1_140	RGVC140	K00728	1. Metabolism	1.7 Glycan biosynthesis and metabolism	Mannose type O-glycan biosynthesis	ko00515	POMT, pmt; dolichyl-phosphate-mannose-protein mannosyltransferase [EC:2.4.1.109]
2022NBT-10800_1_140	RGVC140	K00728	1. Metabolism	1.0 Global and overview maps	Metabolic pathways	ko01100	POMT, pmt; dolichyl-phosphate-mannose-protein mannosyltransferase [EC:2.4.1.109]
2022NBT-10800_1_188	RGVC140	K00789	1. Metabolism	1.5 Amino acid metabolism	Cysteine and methionine metabolism	ko00270	metK; S-adenosylmethionine synthetase [EC:2.5.1.6]
2022NBT-10800_1_188	RGVC140	K00789	1. Metabolism	1.0 Global and overview maps	Metabolic pathways	ko01100	metK; S-adenosylmethionine synthetase [EC:2.5.1.6]
2022NBT-10800_1_188	RGVC140	K00789	1. Metabolism	1.0 Global and overview maps	Biosynthesis of secondary metabolites	ko01110	metK; S-adenosylmethionine synthetase [EC:2.5.1.6]
2022NBT-10800_1_188	RGVC140	K00789	1. Metabolism	1.0 Global and overview maps	Biosynthesis of amino acids	ko01230	metK; S-adenosylmethionine synthetase [EC:2.5.1.6]
2022NBT-11296_1_96	RGVC207	K02968	2. Genetic Information Processing	2.2 Translation	Ribosome	ko03010	RP-S20, rpsT; small subunit ribosomal protein S20
2022NBT-1136_1_19	RGVC215	K00789	1. Metabolism	1.5 Amino acid metabolism	Cysteine and methionine metabolism	ko00270	metK; S-adenosylmethionine synthetase [EC:2.5.1.6]
2022NBT-1136_1_19	RGVC215	K00789	1. Metabolism	1.0 Global and overview maps	Metabolic pathways	ko01100	metK; S-adenosylmethionine synthetase [EC:2.5.1.6]
2022NBT-1136_1_19	RGVC215	K00789	1. Metabolism	1.0 Global and overview maps	Biosynthesis of secondary metabolites	ko01110	metK; S-adenosylmethionine synthetase [EC:2.5.1.6]
2022NBT-1136_1_19	RGVC215	K00789	1. Metabolism	1.0 Global and overview maps	Biosynthesis of amino acids	ko01230	metK; S-adenosylmethionine synthetase [EC:2.5.1.6]
2022NBT-12369_110	RGVC338	K01520	1. Metabolism	1.4 Nucleotide metabolism	Pyrimidine metabolism	ko00240	dut, DUT; dUTP pyrophosphatase [EC:3.6.1.23]
2022NBT-12369_110	RGVC338	K01520	1. Metabolism	1.11 Xenobiotics biodegradation and metabolism	Drug metabolism - other enzymes	ko00983	dut, DUT; dUTP pyrophosphatase [EC:3.6.1.23]
2022NBT-12369_110	RGVC338	K01520	1. Metabolism	1.0 Global and overview maps	Metabolic pathways	ko01100	dut, DUT; dUTP pyrophosphatase [EC:3.6.1.23]
2022NBT-12369_113	RGVC338	K02939	2. Genetic Information Processing	2.2 Translation	Ribosome	ko03010	RP-L9, MRPL9, rplI; large subunit ribosomal protein L9
2022NBT-12369_99	RGVC338	K21636	1. Metabolism	1.4 Nucleotide metabolism	Purine metabolism	ko00230	nrdD; ribonucleoside-triphosphate reductase (formate) [EC:1.1.98.6]
2022NBT-12369_99	RGVC338	K21636	1. Metabolism	1.4 Nucleotide metabolism	Pyrimidine metabolism	ko00240	nrdD; ribonucleoside-triphosphate reductase (formate) [EC:1.1.98.6]
2022NBT-12369_99	RGVC338	K21636	1. Metabolism	1.0 Global and overview maps	Metabolic pathways	ko01100	nrdD; ribonucleoside-triphosphate reductase (formate) [EC:1.1.98.6]
2022NBT-12980_120	RGVC415	K04487	1. Metabolism	1.8 Metabolism of cofactors and vitamins	Thiamine metabolism	ko00730	iscS, NFS1; cysteine desulfurase [EC:2.8.1.7]
2022NBT-12980_120	RGVC415	K04487	1. Metabolism	1.0 Global and overview maps	Metabolic pathways	ko01100	iscS, NFS1; cysteine desulfurase [EC:2.8.1.7]
2022NBT-12980_120	RGVC415	K04487	2. Genetic Information Processing	2.3 Folding, sorting and degradation	Sulfur relay system	ko04122	iscS, NFS1; cysteine desulfurase [EC:2.8.1.7]
2022NBT-12980_69	RGVC415	K00560	1. Metabolism	1.4 Nucleotide metabolism	Pyrimidine metabolism	ko00240	thyA, TYMS; thymidylate synthase [EC:2.1.1.45]
2022NBT-12980_69	RGVC415	K00560	1. Metabolism	1.8 Metabolism of cofactors and vitamins	One carbon pool by folate	ko00670	thyA, TYMS; thymidylate synthase [EC:2.1.1.45]
2022NBT-12980_69	RGVC415	K00560	1. Metabolism	1.0 Global and overview maps	Metabolic pathways	ko01100	thyA, TYMS; thymidylate synthase [EC:2.1.1.45]
2022NBT-12980_69	RGVC415	K00560	6. Human Diseases	6.12 Drug resistance: antineoplastic	Antifolate resistance	ko01523	thyA, TYMS; thymidylate synthase [EC:2.1.1.45]
2022NBT-12980_76	RGVC415	K01520	1. Metabolism	1.4 Nucleotide metabolism	Pyrimidine metabolism	ko00240	dut, DUT; dUTP pyrophosphatase [EC:3.6.1.23]
2022NBT-12980_76	RGVC415	K01520	1. Metabolism	1.11 Xenobiotics biodegradation and metabolism	Drug metabolism - other enzymes	ko00983	dut, DUT; dUTP pyrophosphatase [EC:3.6.1.23]
2022NBT-12980_76	RGVC415	K01520	1. Metabolism	1.0 Global and overview maps	Metabolic pathways	ko01100	dut, DUT; dUTP pyrophosphatase [EC:3.6.1.23]
2022NBT-12980_80	RGVC415	K21636	1. Metabolism	1.4 Nucleotide metabolism	Purine metabolism	ko00230	nrdD; ribonucleoside-triphosphate reductase (formate) [EC:1.1.98.6]
2022NBT-12980_80	RGVC415	K21636	1. Metabolism	1.4 Nucleotide metabolism	Pyrimidine metabolism	ko00240	nrdD; ribonucleoside-triphosphate reductase (formate) [EC:1.1.98.6]
2022NBT-12980_80	RGVC415	K21636	1. Metabolism	1.0 Global and overview maps	Metabolic pathways	ko01100	nrdD; ribonucleoside-triphosphate reductase (formate) [EC:1.1.98.6]
2022NBT-12980_88	RGVC415	K00789	1. Metabolism	1.5 Amino acid metabolism	Cysteine and methionine metabolism	ko00270	metK; S-adenosylmethionine synthetase [EC:2.5.1.6]
2022NBT-12980_88	RGVC415	K00789	1. Metabolism	1.0 Global and overview maps	Metabolic pathways	ko01100	metK; S-adenosylmethionine synthetase [EC:2.5.1.6]
2022NBT-12980_88	RGVC415	K00789	1. Metabolism	1.0 Global and overview maps	Biosynthesis of secondary metabolites	ko01110	metK; S-adenosylmethionine synthetase [EC:2.5.1.6]
2022NBT-12980_88	RGVC415	K00789	1. Metabolism	1.0 Global and overview maps	Biosynthesis of amino acids	ko01230	metK; S-adenosylmethionine synthetase [EC:2.5.1.6]
2022NBT-13925_173	RGVC518	K03462	1. Metabolism	1.8 Metabolism of cofactors and vitamins	Nicotinate and nicotinamide metabolism	ko00760	NAMPT; nicotinamide phosphoribosyltransferase [EC:2.4.2.12]
2022NBT-13925_173	RGVC518	K03462	1. Metabolism	1.0 Global and overview maps	Metabolic pathways	ko01100	NAMPT; nicotinamide phosphoribosyltransferase [EC:2.4.2.12]
2022NBT-13925_173	RGVC518	K03462	5. Organismal Systems	5.1 Immune system	NOD-like receptor signaling pathway	ko04621	NAMPT; nicotinamide phosphoribosyltransferase [EC:2.4.2.12]
2022NBT-13925_211	RGVC518	K00560	1. Metabolism	1.4 Nucleotide metabolism	Pyrimidine metabolism	ko00240	thyA, TYMS; thymidylate synthase [EC:2.1.1.45]
2022NBT-13925_211	RGVC518	K00560	1. Metabolism	1.8 Metabolism of cofactors and vitamins	One carbon pool by folate	ko00670	thyA, TYMS; thymidylate synthase [EC:2.1.1.45]
2022NBT-13925_211	RGVC518	K00560	1. Metabolism	1.0 Global and overview maps	Metabolic pathways	ko01100	thyA, TYMS; thymidylate synthase [EC:2.1.1.45]
2022NBT-13925_211	RGVC518	K00560	6. Human Diseases	6.12 Drug resistance: antineoplastic	Antifolate resistance	ko01523	thyA, TYMS; thymidylate synthase [EC:2.1.1.45]
2022NBT-14169_1_106	RGVC551	K01520	1. Metabolism	1.4 Nucleotide metabolism	Pyrimidine metabolism	ko00240	dut, DUT; dUTP pyrophosphatase [EC:3.6.1.23]
2022NBT-14169_1_106	RGVC551	K01520	1. Metabolism	1.11 Xenobiotics biodegradation and metabolism	Drug metabolism - other enzymes	ko00983	dut, DUT; dUTP pyrophosphatase [EC:3.6.1.23]
2022NBT-14169_1_106	RGVC551	K01520	1. Metabolism	1.0 Global and overview maps	Metabolic pathways	ko01100	dut, DUT; dUTP pyrophosphatase [EC:3.6.1.23]
2022NBT-1446_1_33	RGVC577	K00558	1. Metabolism	1.5 Amino acid metabolism	Cysteine and methionine metabolism	ko00270	DNMT1, dcm; DNA (cytosine-5)-methyltransferase 1 [EC:2.1.1.37]
2022NBT-1446_1_33	RGVC577	K00558	1. Metabolism	1.0 Global and overview maps	Metabolic pathways	ko01100	DNMT1, dcm; DNA (cytosine-5)-methyltransferase 1 [EC:2.1.1.37]
2022NBT-1446_1_33	RGVC577	K00558	6. Human Diseases	6.1 Cancer: overview	MicroRNAs in cancer	ko05206	DNMT1, dcm; DNA (cytosine-5)-methyltransferase 1 [EC:2.1.1.37]
2022NBT-1654_1_111	RGVC796	K00558	1. Metabolism	1.5 Amino acid metabolism	Cysteine and methionine metabolism	ko00270	DNMT1, dcm; DNA (cytosine-5)-methyltransferase 1 [EC:2.1.1.37]
2022NBT-1654_1_111	RGVC796	K00558	1. Metabolism	1.0 Global and overview maps	Metabolic pathways	ko01100	DNMT1, dcm; DNA (cytosine-5)-methyltransferase 1 [EC:2.1.1.37]
2022NBT-1654_1_111	RGVC796	K00558	6. Human Diseases	6.1 Cancer: overview	MicroRNAs in cancer	ko05206	DNMT1, dcm; DNA (cytosine-5)-methyltransferase 1 [EC:2.1.1.37]
2022NBT-1654_1_25	RGVC796	K00558	1. Metabolism	1.5 Amino acid metabolism	Cysteine and methionine metabolism	ko00270	DNMT1, dcm; DNA (cytosine-5)-methyltransferase 1 [EC:2.1.1.37]
2022NBT-1654_1_25	RGVC796	K00558	1. Metabolism	1.0 Global and overview maps	Metabolic pathways	ko01100	DNMT1, dcm; DNA (cytosine-5)-methyltransferase 1 [EC:2.1.1.37]
2022NBT-1654_1_25	RGVC796	K00558	6. Human Diseases	6.1 Cancer: overview	MicroRNAs in cancer	ko05206	DNMT1, dcm; DNA (cytosine-5)-methyltransferase 1 [EC:2.1.1.37]
2022NBT-1717_1_47	RGVC851	K00558	1. Metabolism	1.5 Amino acid metabolism	Cysteine and methionine metabolism	ko00270	DNMT1, dcm; DNA (cytosine-5)-methyltransferase 1 [EC:2.1.1.37]
2022NBT-1717_1_47	RGVC851	K00558	1. Metabolism	1.0 Global and overview maps	Metabolic pathways	ko01100	DNMT1, dcm; DNA (cytosine-5)-methyltransferase 1 [EC:2.1.1.37]
2022NBT-1717_1_47	RGVC851	K00558	6. Human Diseases	6.1 Cancer: overview	MicroRNAs in cancer	ko05206	DNMT1, dcm; DNA (cytosine-5)-methyltransferase 1 [EC:2.1.1.37]
2022NBT-1736_1_60	RGVC866	K00558	1. Metabolism	1.5 Amino acid metabolism	Cysteine and methionine metabolism	ko00270	DNMT1, dcm; DNA (cytosine-5)-methyltransferase 1 [EC:2.1.1.37]
2022NBT-1736_1_60	RGVC866	K00558	1. Metabolism	1.0 Global and overview maps	Metabolic pathways	ko01100	DNMT1, dcm; DNA (cytosine-5)-methyltransferase 1 [EC:2.1.1.37]
2022NBT-1736_1_60	RGVC866	K00558	6. Human Diseases	6.1 Cancer: overview	MicroRNAs in cancer	ko05206	DNMT1, dcm; DNA (cytosine-5)-methyltransferase 1 [EC:2.1.1.37]
2022NBT-17886_33	RGVC913	K02968	2. Genetic Information Processing	2.2 Translation	Ribosome	ko03010	RP-S20, rpsT; small subunit ribosomal protein S20
2022NBT-17886_36	RGVC913	K07406	1. Metabolism	1.1 Carbohydrate metabolism	Galactose metabolism	ko00052	melA; alpha-galactosidase [EC:3.2.1.22]
2022NBT-17886_36	RGVC913	K07406	1. Metabolism	1.3 Lipid metabolism	Glycerolipid metabolism	ko00561	melA; alpha-galactosidase [EC:3.2.1.22]
2022NBT-17886_36	RGVC913	K07406	1. Metabolism	1.3 Lipid metabolism	Sphingolipid metabolism	ko00600	melA; alpha-galactosidase [EC:3.2.1.22]
2022NBT-17886_36	RGVC913	K07406	1. Metabolism	1.7 Glycan biosynthesis and metabolism	Glycosphingolipid biosynthesis - globo and isoglobo series	ko00603	melA; alpha-galactosidase [EC:3.2.1.22]
2022NBT-17886_36	RGVC913	K07406	1. Metabolism	1.0 Global and overview maps	Metabolic pathways	ko01100	melA; alpha-galactosidase [EC:3.2.1.22]
2022NBT-17895_1_95	RGVC915	K00558	1. Metabolism	1.5 Amino acid metabolism	Cysteine and methionine metabolism	ko00270	DNMT1, dcm; DNA (cytosine-5)-methyltransferase 1 [EC:2.1.1.37]
2022NBT-17895_1_95	RGVC915	K00558	1. Metabolism	1.0 Global and overview maps	Metabolic pathways	ko01100	DNMT1, dcm; DNA (cytosine-5)-methyltransferase 1 [EC:2.1.1.37]
2022NBT-17895_1_95	RGVC915	K00558	6. Human Diseases	6.1 Cancer: overview	MicroRNAs in cancer	ko05206	DNMT1, dcm; DNA (cytosine-5)-methyltransferase 1 [EC:2.1.1.37]
2022NBT-17971_18	RGVC922	K02967	2. Genetic Information Processing	2.2 Translation	Ribosome	ko03010	RP-S2, MRPS2, rpsB; small subunit ribosomal protein S2
2022NBT-17971_21	RGVC922	K13677	1. Metabolism	1.3 Lipid metabolism	Glycerolipid metabolism	ko00561	dgs, bgsA; 1,2-diacylglycerol-3-alpha-glucose alpha-1,2-glucosyltransferase [EC:2.4.1.208]
2022NBT-17971_21	RGVC922	K13677	1. Metabolism	1.0 Global and overview maps	Metabolic pathways	ko01100	dgs, bgsA; 1,2-diacylglycerol-3-alpha-glucose alpha-1,2-glucosyltransferase [EC:2.4.1.208]
2022NBT-17971_58	RGVC922	K00891	1. Metabolism	1.5 Amino acid metabolism	Phenylalanine, tyrosine and tryptophan biosynthesis	ko00400	aroK, aroL; shikimate kinase [EC:2.7.1.71]
2022NBT-17971_58	RGVC922	K00891	1. Metabolism	1.0 Global and overview maps	Metabolic pathways	ko01100	aroK, aroL; shikimate kinase [EC:2.7.1.71]
2022NBT-17971_58	RGVC922	K00891	1. Metabolism	1.0 Global and overview maps	Biosynthesis of secondary metabolites	ko01110	aroK, aroL; shikimate kinase [EC:2.7.1.71]
2022NBT-17971_58	RGVC922	K00891	1. Metabolism	1.0 Global and overview maps	Biosynthesis of antibiotics	ko01130	aroK, aroL; shikimate kinase [EC:2.7.1.71]
2022NBT-17971_58	RGVC922	K00891	1. Metabolism	1.0 Global and overview maps	Biosynthesis of amino acids	ko01230	aroK, aroL; shikimate kinase [EC:2.7.1.71]
2022NBT-17971_63	RGVC922	K00088	1. Metabolism	1.4 Nucleotide metabolism	Purine metabolism	ko00230	IMPDH, guaB; IMP dehydrogenase [EC:1.1.1.205]
2022NBT-17971_63	RGVC922	K00088	1. Metabolism	1.11 Xenobiotics biodegradation and metabolism	Drug metabolism - other enzymes	ko00983	IMPDH, guaB; IMP dehydrogenase [EC:1.1.1.205]
2022NBT-17971_63	RGVC922	K00088	1. Metabolism	1.0 Global and overview maps	Metabolic pathways	ko01100	IMPDH, guaB; IMP dehydrogenase [EC:1.1.1.205]
2022NBT-17971_63	RGVC922	K00088	1. Metabolism	1.0 Global and overview maps	Biosynthesis of secondary metabolites	ko01110	IMPDH, guaB; IMP dehydrogenase [EC:1.1.1.205]
2022NBT-1840_1_15	RGVC959	K01520	1. Metabolism	1.4 Nucleotide metabolism	Pyrimidine metabolism	ko00240	dut, DUT; dUTP pyrophosphatase [EC:3.6.1.23]
2022NBT-1840_1_15	RGVC959	K01520	1. Metabolism	1.11 Xenobiotics biodegradation and metabolism	Drug metabolism - other enzymes	ko00983	dut, DUT; dUTP pyrophosphatase [EC:3.6.1.23]
2022NBT-1840_1_15	RGVC959	K01520	1. Metabolism	1.0 Global and overview maps	Metabolic pathways	ko01100	dut, DUT; dUTP pyrophosphatase [EC:3.6.1.23]
2022NBT-18403_18	RGVC960	K02078	1. Metabolism	1.10 Biosynthesis of other secondary metabolites	Biosynthesis of various secondary metabolites - part 2	ko00998	acpP; acyl carrier protein
2022NBT-18403_18	RGVC960	K02078	1. Metabolism	1.0 Global and overview maps	Metabolic pathways	ko01100	acpP; acyl carrier protein
2022NBT-18403_18	RGVC960	K02078	1. Metabolism	1.0 Global and overview maps	Biosynthesis of secondary metabolites	ko01110	acpP; acyl carrier protein
2022NBT-18403_18	RGVC960	K02078	1. Metabolism	1.0 Global and overview maps	Biosynthesis of antibiotics	ko01130	acpP; acyl carrier protein
2022NBT-18403_57	RGVC960	K01737	1. Metabolism	1.8 Metabolism of cofactors and vitamins	Folate biosynthesis	ko00790	queD, ptpS, PTS; 6-pyruvoyltetrahydropterin/6-carboxytetrahydropterin synthase [EC:4.2.3.12 4.1.2.50]
2022NBT-18403_57	RGVC960	K01737	1. Metabolism	1.0 Global and overview maps	Metabolic pathways	ko01100	queD, ptpS, PTS; 6-pyruvoyltetrahydropterin/6-carboxytetrahydropterin synthase [EC:4.2.3.12 4.1.2.50]
2022NBT-18403_62	RGVC960	K02899	2. Genetic Information Processing	2.2 Translation	Ribosome	ko03010	RP-L27, MRPL27, rpmA; large subunit ribosomal protein L27
2022NBT-18403_68	RGVC960	K01761	1. Metabolism	1.5 Amino acid metabolism	Cysteine and methionine metabolism	ko00270	E4.4.1.11; methionine-gamma-lyase [EC:4.4.1.11]
2022NBT-18403_68	RGVC960	K01761	1. Metabolism	1.6 Metabolism of other amino acids	Selenocompound metabolism	ko00450	E4.4.1.11; methionine-gamma-lyase [EC:4.4.1.11]
2022NBT-18403_68	RGVC960	K01761	1. Metabolism	1.0 Global and overview maps	Metabolic pathways	ko01100	E4.4.1.11; methionine-gamma-lyase [EC:4.4.1.11]
2022NBT-18403_84	RGVC960	K01810	1. Metabolism	1.1 Carbohydrate metabolism	Glycolysis / Gluconeogenesis	ko00010	GPI, pgi; glucose-6-phosphate isomerase [EC:5.3.1.9]
2022NBT-18403_84	RGVC960	K01810	1. Metabolism	1.1 Carbohydrate metabolism	Pentose phosphate pathway	ko00030	GPI, pgi; glucose-6-phosphate isomerase [EC:5.3.1.9]
2022NBT-18403_84	RGVC960	K01810	1. Metabolism	1.1 Carbohydrate metabolism	Starch and sucrose metabolism	ko00500	GPI, pgi; glucose-6-phosphate isomerase [EC:5.3.1.9]
2022NBT-18403_84	RGVC960	K01810	1. Metabolism	1.1 Carbohydrate metabolism	Amino sugar and nucleotide sugar metabolism	ko00520	GPI, pgi; glucose-6-phosphate isomerase [EC:5.3.1.9]
2022NBT-18403_84	RGVC960	K01810	1. Metabolism	1.0 Global and overview maps	Metabolic pathways	ko01100	GPI, pgi; glucose-6-phosphate isomerase [EC:5.3.1.9]
2022NBT-18403_84	RGVC960	K01810	1. Metabolism	1.0 Global and overview maps	Biosynthesis of secondary metabolites	ko01110	GPI, pgi; glucose-6-phosphate isomerase [EC:5.3.1.9]
2022NBT-18403_84	RGVC960	K01810	1. Metabolism	1.0 Global and overview maps	Microbial metabolism in diverse environments	ko01120	GPI, pgi; glucose-6-phosphate isomerase [EC:5.3.1.9]
2022NBT-18403_84	RGVC960	K01810	1. Metabolism	1.0 Global and overview maps	Biosynthesis of antibiotics	ko01130	GPI, pgi; glucose-6-phosphate isomerase [EC:5.3.1.9]
2022NBT-18403_84	RGVC960	K01810	1. Metabolism	1.0 Global and overview maps	Carbon metabolism	ko01200	GPI, pgi; glucose-6-phosphate isomerase [EC:5.3.1.9]
2022NBT-18762_136	RGVC1000	K02564	1. Metabolism	1.1 Carbohydrate metabolism	Amino sugar and nucleotide sugar metabolism	ko00520	nagB, GNPDA; glucosamine-6-phosphate deaminase [EC:3.5.99.6]
2022NBT-18762_136	RGVC1000	K02564	1. Metabolism	1.0 Global and overview maps	Metabolic pathways	ko01100	nagB, GNPDA; glucosamine-6-phosphate deaminase [EC:3.5.99.6]
2022NBT-18889_61	RGVC1013	K01209	1. Metabolism	1.1 Carbohydrate metabolism	Amino sugar and nucleotide sugar metabolism	ko00520	abfA; alpha-L-arabinofuranosidase [EC:3.2.1.55]
2022NBT-18889_61	RGVC1013	K01209	1. Metabolism	1.0 Global and overview maps	Metabolic pathways	ko01100	abfA; alpha-L-arabinofuranosidase [EC:3.2.1.55]
2022NBT-18889_75	RGVC1013	K07406	1. Metabolism	1.1 Carbohydrate metabolism	Galactose metabolism	ko00052	melA; alpha-galactosidase [EC:3.2.1.22]
2022NBT-18889_75	RGVC1013	K07406	1. Metabolism	1.3 Lipid metabolism	Glycerolipid metabolism	ko00561	melA; alpha-galactosidase [EC:3.2.1.22]
2022NBT-18889_75	RGVC1013	K07406	1. Metabolism	1.3 Lipid metabolism	Sphingolipid metabolism	ko00600	melA; alpha-galactosidase [EC:3.2.1.22]
2022NBT-18889_75	RGVC1013	K07406	1. Metabolism	1.7 Glycan biosynthesis and metabolism	Glycosphingolipid biosynthesis - globo and isoglobo series	ko00603	melA; alpha-galactosidase [EC:3.2.1.22]
2022NBT-18889_75	RGVC1013	K07406	1. Metabolism	1.0 Global and overview maps	Metabolic pathways	ko01100	melA; alpha-galactosidase [EC:3.2.1.22]
2022NBT-19037_41	RGVC1020	K21636	1. Metabolism	1.4 Nucleotide metabolism	Purine metabolism	ko00230	nrdD; ribonucleoside-triphosphate reductase (formate) [EC:1.1.98.6]
2022NBT-19037_41	RGVC1020	K21636	1. Metabolism	1.4 Nucleotide metabolism	Pyrimidine metabolism	ko00240	nrdD; ribonucleoside-triphosphate reductase (formate) [EC:1.1.98.6]
2022NBT-19037_41	RGVC1020	K21636	1. Metabolism	1.0 Global and overview maps	Metabolic pathways	ko01100	nrdD; ribonucleoside-triphosphate reductase (formate) [EC:1.1.98.6]
2022NBT-19037_44	RGVC1020	K01520	1. Metabolism	1.4 Nucleotide metabolism	Pyrimidine metabolism	ko00240	dut, DUT; dUTP pyrophosphatase [EC:3.6.1.23]
2022NBT-19037_44	RGVC1020	K01520	1. Metabolism	1.11 Xenobiotics biodegradation and metabolism	Drug metabolism - other enzymes	ko00983	dut, DUT; dUTP pyrophosphatase [EC:3.6.1.23]
2022NBT-19037_44	RGVC1020	K01520	1. Metabolism	1.0 Global and overview maps	Metabolic pathways	ko01100	dut, DUT; dUTP pyrophosphatase [EC:3.6.1.23]
2022NBT-19066_1_30	RGVC1026	K01006	1. Metabolism	1.1 Carbohydrate metabolism	Pyruvate metabolism	ko00620	ppdK; pyruvate, orthophosphate dikinase [EC:2.7.9.1]
2022NBT-19066_1_30	RGVC1026	K01006	1. Metabolism	1.2 Energy metabolism	Carbon fixation in photosynthetic organisms	ko00710	ppdK; pyruvate, orthophosphate dikinase [EC:2.7.9.1]
2022NBT-19066_1_30	RGVC1026	K01006	1. Metabolism	1.2 Energy metabolism	Carbon fixation pathways in prokaryotes	ko00720	ppdK; pyruvate, orthophosphate dikinase [EC:2.7.9.1]
2022NBT-19066_1_30	RGVC1026	K01006	1. Metabolism	1.0 Global and overview maps	Metabolic pathways	ko01100	ppdK; pyruvate, orthophosphate dikinase [EC:2.7.9.1]
2022NBT-19066_1_30	RGVC1026	K01006	1. Metabolism	1.0 Global and overview maps	Microbial metabolism in diverse environments	ko01120	ppdK; pyruvate, orthophosphate dikinase [EC:2.7.9.1]
2022NBT-19066_1_30	RGVC1026	K01006	1. Metabolism	1.0 Global and overview maps	Carbon metabolism	ko01200	ppdK; pyruvate, orthophosphate dikinase [EC:2.7.9.1]
2022NBT-19066_1_62	RGVC1026	K00558	1. Metabolism	1.5 Amino acid metabolism	Cysteine and methionine metabolism	ko00270	DNMT1, dcm; DNA (cytosine-5)-methyltransferase 1 [EC:2.1.1.37]
2022NBT-19066_1_62	RGVC1026	K00558	1. Metabolism	1.0 Global and overview maps	Metabolic pathways	ko01100	DNMT1, dcm; DNA (cytosine-5)-methyltransferase 1 [EC:2.1.1.37]
2022NBT-19066_1_62	RGVC1026	K00558	6. Human Diseases	6.1 Cancer: overview	MicroRNAs in cancer	ko05206	DNMT1, dcm; DNA (cytosine-5)-methyltransferase 1 [EC:2.1.1.37]
2022NBT-19273_27	RGVC1048	K21636	1. Metabolism	1.4 Nucleotide metabolism	Purine metabolism	ko00230	nrdD; ribonucleoside-triphosphate reductase (formate) [EC:1.1.98.6]
2022NBT-19273_27	RGVC1048	K21636	1. Metabolism	1.4 Nucleotide metabolism	Pyrimidine metabolism	ko00240	nrdD; ribonucleoside-triphosphate reductase (formate) [EC:1.1.98.6]
2022NBT-19273_27	RGVC1048	K21636	1. Metabolism	1.0 Global and overview maps	Metabolic pathways	ko01100	nrdD; ribonucleoside-triphosphate reductase (formate) [EC:1.1.98.6]
2022NBT-20215_72	RGVC1118	K02114	1. Metabolism	1.2 Energy metabolism	Oxidative phosphorylation	ko00190	ATPF1E, atpC; F-type H+-transporting ATPase subunit epsilon
2022NBT-20215_72	RGVC1118	K02114	1. Metabolism	1.2 Energy metabolism	Photosynthesis	ko00195	ATPF1E, atpC; F-type H+-transporting ATPase subunit epsilon
2022NBT-20215_72	RGVC1118	K02114	1. Metabolism	1.0 Global and overview maps	Metabolic pathways	ko01100	ATPF1E, atpC; F-type H+-transporting ATPase subunit epsilon
2022NBT-20237_1_43	RGVC1119	K00558	1. Metabolism	1.5 Amino acid metabolism	Cysteine and methionine metabolism	ko00270	DNMT1, dcm; DNA (cytosine-5)-methyltransferase 1 [EC:2.1.1.37]
2022NBT-20237_1_43	RGVC1119	K00558	1. Metabolism	1.0 Global and overview maps	Metabolic pathways	ko01100	DNMT1, dcm; DNA (cytosine-5)-methyltransferase 1 [EC:2.1.1.37]
2022NBT-20237_1_43	RGVC1119	K00558	6. Human Diseases	6.1 Cancer: overview	MicroRNAs in cancer	ko05206	DNMT1, dcm; DNA (cytosine-5)-methyltransferase 1 [EC:2.1.1.37]
2022NBT-20237_1_45	RGVC1119	K00789	1. Metabolism	1.5 Amino acid metabolism	Cysteine and methionine metabolism	ko00270	metK; S-adenosylmethionine synthetase [EC:2.5.1.6]
2022NBT-20237_1_45	RGVC1119	K00789	1. Metabolism	1.0 Global and overview maps	Metabolic pathways	ko01100	metK; S-adenosylmethionine synthetase [EC:2.5.1.6]
2022NBT-20237_1_45	RGVC1119	K00789	1. Metabolism	1.0 Global and overview maps	Biosynthesis of secondary metabolites	ko01110	metK; S-adenosylmethionine synthetase [EC:2.5.1.6]
2022NBT-20237_1_45	RGVC1119	K00789	1. Metabolism	1.0 Global and overview maps	Biosynthesis of amino acids	ko01230	metK; S-adenosylmethionine synthetase [EC:2.5.1.6]
2022NBT-20246_61	RGVC1121	K00558	1. Metabolism	1.5 Amino acid metabolism	Cysteine and methionine metabolism	ko00270	DNMT1, dcm; DNA (cytosine-5)-methyltransferase 1 [EC:2.1.1.37]
2022NBT-20246_61	RGVC1121	K00558	1. Metabolism	1.0 Global and overview maps	Metabolic pathways	ko01100	DNMT1, dcm; DNA (cytosine-5)-methyltransferase 1 [EC:2.1.1.37]
2022NBT-20246_61	RGVC1121	K00558	6. Human Diseases	6.1 Cancer: overview	MicroRNAs in cancer	ko05206	DNMT1, dcm; DNA (cytosine-5)-methyltransferase 1 [EC:2.1.1.37]
2022NBT-20246_63	RGVC1121	K00558	1. Metabolism	1.5 Amino acid metabolism	Cysteine and methionine metabolism	ko00270	DNMT1, dcm; DNA (cytosine-5)-methyltransferase 1 [EC:2.1.1.37]
2022NBT-20246_63	RGVC1121	K00558	1. Metabolism	1.0 Global and overview maps	Metabolic pathways	ko01100	DNMT1, dcm; DNA (cytosine-5)-methyltransferase 1 [EC:2.1.1.37]
2022NBT-20246_63	RGVC1121	K00558	6. Human Diseases	6.1 Cancer: overview	MicroRNAs in cancer	ko05206	DNMT1, dcm; DNA (cytosine-5)-methyltransferase 1 [EC:2.1.1.37]
2022NBT-20246_90	RGVC1121	K00558	1. Metabolism	1.5 Amino acid metabolism	Cysteine and methionine metabolism	ko00270	DNMT1, dcm; DNA (cytosine-5)-methyltransferase 1 [EC:2.1.1.37]
2022NBT-20246_90	RGVC1121	K00558	1. Metabolism	1.0 Global and overview maps	Metabolic pathways	ko01100	DNMT1, dcm; DNA (cytosine-5)-methyltransferase 1 [EC:2.1.1.37]
2022NBT-20246_90	RGVC1121	K00558	6. Human Diseases	6.1 Cancer: overview	MicroRNAs in cancer	ko05206	DNMT1, dcm; DNA (cytosine-5)-methyltransferase 1 [EC:2.1.1.37]
2022NBT-20463_1_45	RGVC1137	K00558	1. Metabolism	1.5 Amino acid metabolism	Cysteine and methionine metabolism	ko00270	DNMT1, dcm; DNA (cytosine-5)-methyltransferase 1 [EC:2.1.1.37]
2022NBT-20463_1_45	RGVC1137	K00558	1. Metabolism	1.0 Global and overview maps	Metabolic pathways	ko01100	DNMT1, dcm; DNA (cytosine-5)-methyltransferase 1 [EC:2.1.1.37]
2022NBT-20463_1_45	RGVC1137	K00558	6. Human Diseases	6.1 Cancer: overview	MicroRNAs in cancer	ko05206	DNMT1, dcm; DNA (cytosine-5)-methyltransferase 1 [EC:2.1.1.37]
2022NBT-20463_1_63	RGVC1137	K00789	1. Metabolism	1.5 Amino acid metabolism	Cysteine and methionine metabolism	ko00270	metK; S-adenosylmethionine synthetase [EC:2.5.1.6]
2022NBT-20463_1_63	RGVC1137	K00789	1. Metabolism	1.0 Global and overview maps	Metabolic pathways	ko01100	metK; S-adenosylmethionine synthetase [EC:2.5.1.6]
2022NBT-20463_1_63	RGVC1137	K00789	1. Metabolism	1.0 Global and overview maps	Biosynthesis of secondary metabolites	ko01110	metK; S-adenosylmethionine synthetase [EC:2.5.1.6]
2022NBT-20463_1_63	RGVC1137	K00789	1. Metabolism	1.0 Global and overview maps	Biosynthesis of amino acids	ko01230	metK; S-adenosylmethionine synthetase [EC:2.5.1.6]
2022NBT-21354_104	RGVC1210	K02412	4. Cellular Processes	4.5 Cell motility	Flagellar assembly	ko02040	fliI; flagellum-specific ATP synthase [EC:7.4.2.8]
2022NBT-21354_108	RGVC1210	K02410	4. Cellular Processes	4.5 Cell motility	Bacterial chemotaxis	ko02030	fliG; flagellar motor switch protein FliG
2022NBT-21354_108	RGVC1210	K02410	4. Cellular Processes	4.5 Cell motility	Flagellar assembly	ko02040	fliG; flagellar motor switch protein FliG
2022NBT-21354_114	RGVC1210	K02408	4. Cellular Processes	4.5 Cell motility	Flagellar assembly	ko02040	fliE; flagellar hook-basal body complex protein FliE
2022NBT-21354_146	RGVC1210	K00705	1. Metabolism	1.1 Carbohydrate metabolism	Starch and sucrose metabolism	ko00500	malQ; 4-alpha-glucanotransferase [EC:2.4.1.25]
2022NBT-21354_146	RGVC1210	K00705	1. Metabolism	1.0 Global and overview maps	Metabolic pathways	ko01100	malQ; 4-alpha-glucanotransferase [EC:2.4.1.25]
2022NBT-21354_146	RGVC1210	K00705	1. Metabolism	1.0 Global and overview maps	Biosynthesis of secondary metabolites	ko01110	malQ; 4-alpha-glucanotransferase [EC:2.4.1.25]
2022NBT-21354_152	RGVC1210	K02406	3. Environmental Information Processing	3.2 Signal transduction	Two-component system	ko02020	fliC; flagellin
2022NBT-21354_152	RGVC1210	K02406	4. Cellular Processes	4.5 Cell motility	Flagellar assembly	ko02040	fliC; flagellin
2022NBT-21354_152	RGVC1210	K02406	5. Organismal Systems	5.1 Immune system	NOD-like receptor signaling pathway	ko04621	fliC; flagellin
2022NBT-21354_152	RGVC1210	K02406	5. Organismal Systems	5.10 Environmental adaptation	Plant-pathogen interaction	ko04626	fliC; flagellin
2022NBT-21354_152	RGVC1210	K02406	6. Human Diseases	6.8 Infectious disease: bacterial	Shigellosis	ko05131	fliC; flagellin
2022NBT-21354_152	RGVC1210	K02406	6. Human Diseases	6.8 Infectious disease: bacterial	Salmonella infection	ko05132	fliC; flagellin
2022NBT-21354_152	RGVC1210	K02406	6. Human Diseases	6.8 Infectious disease: bacterial	Legionellosis	ko05134	fliC; flagellin
2022NBT-21354_153	RGVC1210	K02406	3. Environmental Information Processing	3.2 Signal transduction	Two-component system	ko02020	fliC; flagellin
2022NBT-21354_153	RGVC1210	K02406	4. Cellular Processes	4.5 Cell motility	Flagellar assembly	ko02040	fliC; flagellin
2022NBT-21354_153	RGVC1210	K02406	5. Organismal Systems	5.1 Immune system	NOD-like receptor signaling pathway	ko04621	fliC; flagellin
2022NBT-21354_153	RGVC1210	K02406	5. Organismal Systems	5.10 Environmental adaptation	Plant-pathogen interaction	ko04626	fliC; flagellin
2022NBT-21354_153	RGVC1210	K02406	6. Human Diseases	6.8 Infectious disease: bacterial	Shigellosis	ko05131	fliC; flagellin
2022NBT-21354_153	RGVC1210	K02406	6. Human Diseases	6.8 Infectious disease: bacterial	Salmonella infection	ko05132	fliC; flagellin
2022NBT-21354_153	RGVC1210	K02406	6. Human Diseases	6.8 Infectious disease: bacterial	Legionellosis	ko05134	fliC; flagellin
2022NBT-21354_22	RGVC1210	K02967	2. Genetic Information Processing	2.2 Translation	Ribosome	ko03010	RP-S2, MRPS2, rpsB; small subunit ribosomal protein S2
2022NBT-21354_82	RGVC1210	K00891	1. Metabolism	1.5 Amino acid metabolism	Phenylalanine, tyrosine and tryptophan biosynthesis	ko00400	aroK, aroL; shikimate kinase [EC:2.7.1.71]
2022NBT-21354_82	RGVC1210	K00891	1. Metabolism	1.0 Global and overview maps	Metabolic pathways	ko01100	aroK, aroL; shikimate kinase [EC:2.7.1.71]
2022NBT-21354_82	RGVC1210	K00891	1. Metabolism	1.0 Global and overview maps	Biosynthesis of secondary metabolites	ko01110	aroK, aroL; shikimate kinase [EC:2.7.1.71]
2022NBT-21354_82	RGVC1210	K00891	1. Metabolism	1.0 Global and overview maps	Biosynthesis of antibiotics	ko01130	aroK, aroL; shikimate kinase [EC:2.7.1.71]
2022NBT-21354_82	RGVC1210	K00891	1. Metabolism	1.0 Global and overview maps	Biosynthesis of amino acids	ko01230	aroK, aroL; shikimate kinase [EC:2.7.1.71]
2022NBT-21569_35	RGVC1229	K01520	1. Metabolism	1.4 Nucleotide metabolism	Pyrimidine metabolism	ko00240	dut, DUT; dUTP pyrophosphatase [EC:3.6.1.23]
2022NBT-21569_35	RGVC1229	K01520	1. Metabolism	1.11 Xenobiotics biodegradation and metabolism	Drug metabolism - other enzymes	ko00983	dut, DUT; dUTP pyrophosphatase [EC:3.6.1.23]
2022NBT-21569_35	RGVC1229	K01520	1. Metabolism	1.0 Global and overview maps	Metabolic pathways	ko01100	dut, DUT; dUTP pyrophosphatase [EC:3.6.1.23]
2022NBT-21569_54	RGVC1229	K01520	1. Metabolism	1.4 Nucleotide metabolism	Pyrimidine metabolism	ko00240	dut, DUT; dUTP pyrophosphatase [EC:3.6.1.23]
2022NBT-21569_54	RGVC1229	K01520	1. Metabolism	1.11 Xenobiotics biodegradation and metabolism	Drug metabolism - other enzymes	ko00983	dut, DUT; dUTP pyrophosphatase [EC:3.6.1.23]
2022NBT-21569_54	RGVC1229	K01520	1. Metabolism	1.0 Global and overview maps	Metabolic pathways	ko01100	dut, DUT; dUTP pyrophosphatase [EC:3.6.1.23]
2022NBT-21599_1_44	RGVC1233	K00558	1. Metabolism	1.5 Amino acid metabolism	Cysteine and methionine metabolism	ko00270	DNMT1, dcm; DNA (cytosine-5)-methyltransferase 1 [EC:2.1.1.37]
2022NBT-21599_1_44	RGVC1233	K00558	1. Metabolism	1.0 Global and overview maps	Metabolic pathways	ko01100	DNMT1, dcm; DNA (cytosine-5)-methyltransferase 1 [EC:2.1.1.37]
2022NBT-21599_1_44	RGVC1233	K00558	6. Human Diseases	6.1 Cancer: overview	MicroRNAs in cancer	ko05206	DNMT1, dcm; DNA (cytosine-5)-methyltransferase 1 [EC:2.1.1.37]
2022NBT-21956_1_94	RGVC1259	K00558	1. Metabolism	1.5 Amino acid metabolism	Cysteine and methionine metabolism	ko00270	DNMT1, dcm; DNA (cytosine-5)-methyltransferase 1 [EC:2.1.1.37]
2022NBT-21956_1_94	RGVC1259	K00558	1. Metabolism	1.0 Global and overview maps	Metabolic pathways	ko01100	DNMT1, dcm; DNA (cytosine-5)-methyltransferase 1 [EC:2.1.1.37]
2022NBT-21956_1_94	RGVC1259	K00558	6. Human Diseases	6.1 Cancer: overview	MicroRNAs in cancer	ko05206	DNMT1, dcm; DNA (cytosine-5)-methyltransferase 1 [EC:2.1.1.37]
2022NBT-22341_98	RGVC1296	K01478	1. Metabolism	1.5 Amino acid metabolism	Arginine biosynthesis	ko00220	arcA; arginine deiminase [EC:3.5.3.6]
2022NBT-22341_98	RGVC1296	K01478	1. Metabolism	1.0 Global and overview maps	Metabolic pathways	ko01100	arcA; arginine deiminase [EC:3.5.3.6]
2022NBT-22341_98	RGVC1296	K01478	1. Metabolism	1.0 Global and overview maps	Biosynthesis of secondary metabolites	ko01110	arcA; arginine deiminase [EC:3.5.3.6]
2022NBT-22341_98	RGVC1296	K01478	1. Metabolism	1.0 Global and overview maps	Biosynthesis of antibiotics	ko01130	arcA; arginine deiminase [EC:3.5.3.6]
2022NBT-22732_21	RGVC1322	K01520	1. Metabolism	1.4 Nucleotide metabolism	Pyrimidine metabolism	ko00240	dut, DUT; dUTP pyrophosphatase [EC:3.6.1.23]
2022NBT-22732_21	RGVC1322	K01520	1. Metabolism	1.11 Xenobiotics biodegradation and metabolism	Drug metabolism - other enzymes	ko00983	dut, DUT; dUTP pyrophosphatase [EC:3.6.1.23]
2022NBT-22732_21	RGVC1322	K01520	1. Metabolism	1.0 Global and overview maps	Metabolic pathways	ko01100	dut, DUT; dUTP pyrophosphatase [EC:3.6.1.23]
2022NBT-22732_23	RGVC1322	K01520	1. Metabolism	1.4 Nucleotide metabolism	Pyrimidine metabolism	ko00240	dut, DUT; dUTP pyrophosphatase [EC:3.6.1.23]
2022NBT-22732_23	RGVC1322	K01520	1. Metabolism	1.11 Xenobiotics biodegradation and metabolism	Drug metabolism - other enzymes	ko00983	dut, DUT; dUTP pyrophosphatase [EC:3.6.1.23]
2022NBT-22732_23	RGVC1322	K01520	1. Metabolism	1.0 Global and overview maps	Metabolic pathways	ko01100	dut, DUT; dUTP pyrophosphatase [EC:3.6.1.23]
2022NBT-22859_106	RGVC1330	K00558	1. Metabolism	1.5 Amino acid metabolism	Cysteine and methionine metabolism	ko00270	DNMT1, dcm; DNA (cytosine-5)-methyltransferase 1 [EC:2.1.1.37]
2022NBT-22859_106	RGVC1330	K00558	1. Metabolism	1.0 Global and overview maps	Metabolic pathways	ko01100	DNMT1, dcm; DNA (cytosine-5)-methyltransferase 1 [EC:2.1.1.37]
2022NBT-22859_106	RGVC1330	K00558	6. Human Diseases	6.1 Cancer: overview	MicroRNAs in cancer	ko05206	DNMT1, dcm; DNA (cytosine-5)-methyltransferase 1 [EC:2.1.1.37]
2022NBT-237_1_39	RGVC1394	K21636	1. Metabolism	1.4 Nucleotide metabolism	Purine metabolism	ko00230	nrdD; ribonucleoside-triphosphate reductase (formate) [EC:1.1.98.6]
2022NBT-237_1_39	RGVC1394	K21636	1. Metabolism	1.4 Nucleotide metabolism	Pyrimidine metabolism	ko00240	nrdD; ribonucleoside-triphosphate reductase (formate) [EC:1.1.98.6]
2022NBT-237_1_39	RGVC1394	K21636	1. Metabolism	1.0 Global and overview maps	Metabolic pathways	ko01100	nrdD; ribonucleoside-triphosphate reductase (formate) [EC:1.1.98.6]
2022NBT-24243_86	RGVC1436	K00700	1. Metabolism	1.1 Carbohydrate metabolism	Starch and sucrose metabolism	ko00500	GBE1, glgB; 1,4-alpha-glucan branching enzyme [EC:2.4.1.18]
2022NBT-24243_86	RGVC1436	K00700	1. Metabolism	1.0 Global and overview maps	Metabolic pathways	ko01100	GBE1, glgB; 1,4-alpha-glucan branching enzyme [EC:2.4.1.18]
2022NBT-24243_86	RGVC1436	K00700	1. Metabolism	1.0 Global and overview maps	Biosynthesis of secondary metabolites	ko01110	GBE1, glgB; 1,4-alpha-glucan branching enzyme [EC:2.4.1.18]
2022NBT-24243_99	RGVC1436	K02034	4. Cellular Processes	4.4 Cellular community - prokaryotes	Quorum sensing	ko02024	ABC.PE.P1; peptide/nickel transport system permease protein
2022NBT-24250_109	RGVC1437	K00688	1. Metabolism	1.1 Carbohydrate metabolism	Starch and sucrose metabolism	ko00500	PYG, glgP; glycogen phosphorylase [EC:2.4.1.1]
2022NBT-24250_109	RGVC1437	K00688	1. Metabolism	1.0 Global and overview maps	Metabolic pathways	ko01100	PYG, glgP; glycogen phosphorylase [EC:2.4.1.1]
2022NBT-24250_109	RGVC1437	K00688	1. Metabolism	1.0 Global and overview maps	Biosynthesis of secondary metabolites	ko01110	PYG, glgP; glycogen phosphorylase [EC:2.4.1.1]
2022NBT-24250_109	RGVC1437	K00688	4. Cellular Processes	4.4 Cellular community - prokaryotes	Biofilm formation - Escherichia coli	ko02026	PYG, glgP; glycogen phosphorylase [EC:2.4.1.1]
2022NBT-24250_109	RGVC1437	K00688	4. Cellular Processes	4.2 Cell growth and death	Necroptosis	ko04217	PYG, glgP; glycogen phosphorylase [EC:2.4.1.1]
2022NBT-24250_109	RGVC1437	K00688	5. Organismal Systems	5.2 Endocrine system	Insulin signaling pathway	ko04910	PYG, glgP; glycogen phosphorylase [EC:2.4.1.1]
2022NBT-24250_109	RGVC1437	K00688	5. Organismal Systems	5.2 Endocrine system	Glucagon signaling pathway	ko04922	PYG, glgP; glycogen phosphorylase [EC:2.4.1.1]
2022NBT-24250_109	RGVC1437	K00688	6. Human Diseases	6.7 Endocrine and metabolic disease	Insulin resistance	ko04931	PYG, glgP; glycogen phosphorylase [EC:2.4.1.1]
2022NBT-25352_1_32	RGVC1511	K05349	1. Metabolism	1.6 Metabolism of other amino acids	Cyanoamino acid metabolism	ko00460	bglX; beta-glucosidase [EC:3.2.1.21]
2022NBT-25352_1_32	RGVC1511	K05349	1. Metabolism	1.1 Carbohydrate metabolism	Starch and sucrose metabolism	ko00500	bglX; beta-glucosidase [EC:3.2.1.21]
2022NBT-25352_1_32	RGVC1511	K05349	1. Metabolism	1.10 Biosynthesis of other secondary metabolites	Phenylpropanoid biosynthesis	ko00940	bglX; beta-glucosidase [EC:3.2.1.21]
2022NBT-25352_1_32	RGVC1511	K05349	1. Metabolism	1.0 Global and overview maps	Metabolic pathways	ko01100	bglX; beta-glucosidase [EC:3.2.1.21]
2022NBT-25352_1_32	RGVC1511	K05349	1. Metabolism	1.0 Global and overview maps	Biosynthesis of secondary metabolites	ko01110	bglX; beta-glucosidase [EC:3.2.1.21]
2022NBT-262_1_46	RGVC1571	K00826	1. Metabolism	1.5 Amino acid metabolism	Cysteine and methionine metabolism	ko00270	E2.6.1.42, ilvE; branched-chain amino acid aminotransferase [EC:2.6.1.42]
2022NBT-262_1_46	RGVC1571	K00826	1. Metabolism	1.5 Amino acid metabolism	Valine, leucine and isoleucine degradation	ko00280	E2.6.1.42, ilvE; branched-chain amino acid aminotransferase [EC:2.6.1.42]
2022NBT-262_1_46	RGVC1571	K00826	1. Metabolism	1.5 Amino acid metabolism	Valine, leucine and isoleucine biosynthesis	ko00290	E2.6.1.42, ilvE; branched-chain amino acid aminotransferase [EC:2.6.1.42]
2022NBT-262_1_46	RGVC1571	K00826	1. Metabolism	1.8 Metabolism of cofactors and vitamins	Pantothenate and CoA biosynthesis	ko00770	E2.6.1.42, ilvE; branched-chain amino acid aminotransferase [EC:2.6.1.42]
2022NBT-262_1_46	RGVC1571	K00826	1. Metabolism	1.10 Biosynthesis of other secondary metabolites	Glucosinolate biosynthesis	ko00966	E2.6.1.42, ilvE; branched-chain amino acid aminotransferase [EC:2.6.1.42]
2022NBT-262_1_46	RGVC1571	K00826	1. Metabolism	1.0 Global and overview maps	Metabolic pathways	ko01100	E2.6.1.42, ilvE; branched-chain amino acid aminotransferase [EC:2.6.1.42]
2022NBT-262_1_46	RGVC1571	K00826	1. Metabolism	1.0 Global and overview maps	Biosynthesis of secondary metabolites	ko01110	E2.6.1.42, ilvE; branched-chain amino acid aminotransferase [EC:2.6.1.42]
2022NBT-262_1_46	RGVC1571	K00826	1. Metabolism	1.0 Global and overview maps	Biosynthesis of antibiotics	ko01130	E2.6.1.42, ilvE; branched-chain amino acid aminotransferase [EC:2.6.1.42]
2022NBT-262_1_46	RGVC1571	K00826	1. Metabolism	1.0 Global and overview maps	2-Oxocarboxylic acid metabolism	ko01210	E2.6.1.42, ilvE; branched-chain amino acid aminotransferase [EC:2.6.1.42]
2022NBT-262_1_46	RGVC1571	K00826	1. Metabolism	1.0 Global and overview maps	Biosynthesis of amino acids	ko01230	E2.6.1.42, ilvE; branched-chain amino acid aminotransferase [EC:2.6.1.42]
2022NBT-26414_77	RGVC1587	K01520	1. Metabolism	1.4 Nucleotide metabolism	Pyrimidine metabolism	ko00240	dut, DUT; dUTP pyrophosphatase [EC:3.6.1.23]
2022NBT-26414_77	RGVC1587	K01520	1. Metabolism	1.11 Xenobiotics biodegradation and metabolism	Drug metabolism - other enzymes	ko00983	dut, DUT; dUTP pyrophosphatase [EC:3.6.1.23]
2022NBT-26414_77	RGVC1587	K01520	1. Metabolism	1.0 Global and overview maps	Metabolic pathways	ko01100	dut, DUT; dUTP pyrophosphatase [EC:3.6.1.23]
2022NBT-27341_108	RGVC1645	K00558	1. Metabolism	1.5 Amino acid metabolism	Cysteine and methionine metabolism	ko00270	DNMT1, dcm; DNA (cytosine-5)-methyltransferase 1 [EC:2.1.1.37]
2022NBT-27341_108	RGVC1645	K00558	1. Metabolism	1.0 Global and overview maps	Metabolic pathways	ko01100	DNMT1, dcm; DNA (cytosine-5)-methyltransferase 1 [EC:2.1.1.37]
2022NBT-27341_108	RGVC1645	K00558	6. Human Diseases	6.1 Cancer: overview	MicroRNAs in cancer	ko05206	DNMT1, dcm; DNA (cytosine-5)-methyltransferase 1 [EC:2.1.1.37]
2022NBT-27736_1_37	RGVC1668	K01520	1. Metabolism	1.4 Nucleotide metabolism	Pyrimidine metabolism	ko00240	dut, DUT; dUTP pyrophosphatase [EC:3.6.1.23]
2022NBT-27736_1_37	RGVC1668	K01520	1. Metabolism	1.11 Xenobiotics biodegradation and metabolism	Drug metabolism - other enzymes	ko00983	dut, DUT; dUTP pyrophosphatase [EC:3.6.1.23]
2022NBT-27736_1_37	RGVC1668	K01520	1. Metabolism	1.0 Global and overview maps	Metabolic pathways	ko01100	dut, DUT; dUTP pyrophosphatase [EC:3.6.1.23]
2022NBT-28160_52	RGVC1697	K02967	2. Genetic Information Processing	2.2 Translation	Ribosome	ko03010	RP-S2, MRPS2, rpsB; small subunit ribosomal protein S2
2022NBT-28160_9	RGVC1697	K00558	1. Metabolism	1.5 Amino acid metabolism	Cysteine and methionine metabolism	ko00270	DNMT1, dcm; DNA (cytosine-5)-methyltransferase 1 [EC:2.1.1.37]
2022NBT-28160_9	RGVC1697	K00558	1. Metabolism	1.0 Global and overview maps	Metabolic pathways	ko01100	DNMT1, dcm; DNA (cytosine-5)-methyltransferase 1 [EC:2.1.1.37]
2022NBT-28160_9	RGVC1697	K00558	6. Human Diseases	6.1 Cancer: overview	MicroRNAs in cancer	ko05206	DNMT1, dcm; DNA (cytosine-5)-methyltransferase 1 [EC:2.1.1.37]
2022NBT-2886_1_54	RGVC1742	K00850	1. Metabolism	1.1 Carbohydrate metabolism	Glycolysis / Gluconeogenesis	ko00010	pfkA, PFK; 6-phosphofructokinase 1 [EC:2.7.1.11]
2022NBT-2886_1_54	RGVC1742	K00850	1. Metabolism	1.1 Carbohydrate metabolism	Pentose phosphate pathway	ko00030	pfkA, PFK; 6-phosphofructokinase 1 [EC:2.7.1.11]
2022NBT-2886_1_54	RGVC1742	K00850	1. Metabolism	1.1 Carbohydrate metabolism	Fructose and mannose metabolism	ko00051	pfkA, PFK; 6-phosphofructokinase 1 [EC:2.7.1.11]
2022NBT-2886_1_54	RGVC1742	K00850	1. Metabolism	1.1 Carbohydrate metabolism	Galactose metabolism	ko00052	pfkA, PFK; 6-phosphofructokinase 1 [EC:2.7.1.11]
2022NBT-2886_1_54	RGVC1742	K00850	1. Metabolism	1.2 Energy metabolism	Methane metabolism	ko00680	pfkA, PFK; 6-phosphofructokinase 1 [EC:2.7.1.11]
2022NBT-2886_1_54	RGVC1742	K00850	1. Metabolism	1.0 Global and overview maps	Metabolic pathways	ko01100	pfkA, PFK; 6-phosphofructokinase 1 [EC:2.7.1.11]
2022NBT-2886_1_54	RGVC1742	K00850	1. Metabolism	1.0 Global and overview maps	Biosynthesis of secondary metabolites	ko01110	pfkA, PFK; 6-phosphofructokinase 1 [EC:2.7.1.11]
2022NBT-2886_1_54	RGVC1742	K00850	1. Metabolism	1.0 Global and overview maps	Microbial metabolism in diverse environments	ko01120	pfkA, PFK; 6-phosphofructokinase 1 [EC:2.7.1.11]
2022NBT-2886_1_54	RGVC1742	K00850	1. Metabolism	1.0 Global and overview maps	Biosynthesis of antibiotics	ko01130	pfkA, PFK; 6-phosphofructokinase 1 [EC:2.7.1.11]
2022NBT-2886_1_54	RGVC1742	K00850	1. Metabolism	1.0 Global and overview maps	Carbon metabolism	ko01200	pfkA, PFK; 6-phosphofructokinase 1 [EC:2.7.1.11]
2022NBT-2886_1_54	RGVC1742	K00850	1. Metabolism	1.0 Global and overview maps	Biosynthesis of amino acids	ko01230	pfkA, PFK; 6-phosphofructokinase 1 [EC:2.7.1.11]
2022NBT-2886_1_54	RGVC1742	K00850	2. Genetic Information Processing	2.3 Folding, sorting and degradation	RNA degradation	ko03018	pfkA, PFK; 6-phosphofructokinase 1 [EC:2.7.1.11]
2022NBT-2886_1_54	RGVC1742	K00850	3. Environmental Information Processing	3.2 Signal transduction	HIF-1 signaling pathway	ko04066	pfkA, PFK; 6-phosphofructokinase 1 [EC:2.7.1.11]
2022NBT-2886_1_54	RGVC1742	K00850	3. Environmental Information Processing	3.2 Signal transduction	AMPK signaling pathway	ko04152	pfkA, PFK; 6-phosphofructokinase 1 [EC:2.7.1.11]
2022NBT-2886_1_54	RGVC1742	K00850	5. Organismal Systems	5.2 Endocrine system	Glucagon signaling pathway	ko04922	pfkA, PFK; 6-phosphofructokinase 1 [EC:2.7.1.11]
2022NBT-2886_1_54	RGVC1742	K00850	6. Human Diseases	6.1 Cancer: overview	Central carbon metabolism in cancer	ko05230	pfkA, PFK; 6-phosphofructokinase 1 [EC:2.7.1.11]
2022NBT-2995_1_100	RGVC1816	K00558	1. Metabolism	1.5 Amino acid metabolism	Cysteine and methionine metabolism	ko00270	DNMT1, dcm; DNA (cytosine-5)-methyltransferase 1 [EC:2.1.1.37]
2022NBT-2995_1_100	RGVC1816	K00558	1. Metabolism	1.0 Global and overview maps	Metabolic pathways	ko01100	DNMT1, dcm; DNA (cytosine-5)-methyltransferase 1 [EC:2.1.1.37]
2022NBT-2995_1_100	RGVC1816	K00558	6. Human Diseases	6.1 Cancer: overview	MicroRNAs in cancer	ko05206	DNMT1, dcm; DNA (cytosine-5)-methyltransferase 1 [EC:2.1.1.37]
2022NBT-2995_1_81	RGVC1816	K00558	1. Metabolism	1.5 Amino acid metabolism	Cysteine and methionine metabolism	ko00270	DNMT1, dcm; DNA (cytosine-5)-methyltransferase 1 [EC:2.1.1.37]
2022NBT-2995_1_81	RGVC1816	K00558	1. Metabolism	1.0 Global and overview maps	Metabolic pathways	ko01100	DNMT1, dcm; DNA (cytosine-5)-methyltransferase 1 [EC:2.1.1.37]
2022NBT-2995_1_81	RGVC1816	K00558	6. Human Diseases	6.1 Cancer: overview	MicroRNAs in cancer	ko05206	DNMT1, dcm; DNA (cytosine-5)-methyltransferase 1 [EC:2.1.1.37]
2022NBT-2995_1_82	RGVC1816	K00558	1. Metabolism	1.5 Amino acid metabolism	Cysteine and methionine metabolism	ko00270	DNMT1, dcm; DNA (cytosine-5)-methyltransferase 1 [EC:2.1.1.37]
2022NBT-2995_1_82	RGVC1816	K00558	1. Metabolism	1.0 Global and overview maps	Metabolic pathways	ko01100	DNMT1, dcm; DNA (cytosine-5)-methyltransferase 1 [EC:2.1.1.37]
2022NBT-2995_1_82	RGVC1816	K00558	6. Human Diseases	6.1 Cancer: overview	MicroRNAs in cancer	ko05206	DNMT1, dcm; DNA (cytosine-5)-methyltransferase 1 [EC:2.1.1.37]
2022NBT-2995_1_98	RGVC1816	K00789	1. Metabolism	1.5 Amino acid metabolism	Cysteine and methionine metabolism	ko00270	metK; S-adenosylmethionine synthetase [EC:2.5.1.6]
2022NBT-2995_1_98	RGVC1816	K00789	1. Metabolism	1.0 Global and overview maps	Metabolic pathways	ko01100	metK; S-adenosylmethionine synthetase [EC:2.5.1.6]
2022NBT-2995_1_98	RGVC1816	K00789	1. Metabolism	1.0 Global and overview maps	Biosynthesis of secondary metabolites	ko01110	metK; S-adenosylmethionine synthetase [EC:2.5.1.6]
2022NBT-2995_1_98	RGVC1816	K00789	1. Metabolism	1.0 Global and overview maps	Biosynthesis of amino acids	ko01230	metK; S-adenosylmethionine synthetase [EC:2.5.1.6]
2022NBT-3106_1_52	RGVC1884	K00558	1. Metabolism	1.5 Amino acid metabolism	Cysteine and methionine metabolism	ko00270	DNMT1, dcm; DNA (cytosine-5)-methyltransferase 1 [EC:2.1.1.37]
2022NBT-3106_1_52	RGVC1884	K00558	1. Metabolism	1.0 Global and overview maps	Metabolic pathways	ko01100	DNMT1, dcm; DNA (cytosine-5)-methyltransferase 1 [EC:2.1.1.37]
2022NBT-3106_1_52	RGVC1884	K00558	6. Human Diseases	6.1 Cancer: overview	MicroRNAs in cancer	ko05206	DNMT1, dcm; DNA (cytosine-5)-methyltransferase 1 [EC:2.1.1.37]
2022NBT-32716_67	RGVC1991	K00558	1. Metabolism	1.5 Amino acid metabolism	Cysteine and methionine metabolism	ko00270	DNMT1, dcm; DNA (cytosine-5)-methyltransferase 1 [EC:2.1.1.37]
2022NBT-32716_67	RGVC1991	K00558	1. Metabolism	1.0 Global and overview maps	Metabolic pathways	ko01100	DNMT1, dcm; DNA (cytosine-5)-methyltransferase 1 [EC:2.1.1.37]
2022NBT-32716_67	RGVC1991	K00558	6. Human Diseases	6.1 Cancer: overview	MicroRNAs in cancer	ko05206	DNMT1, dcm; DNA (cytosine-5)-methyltransferase 1 [EC:2.1.1.37]
2022NBT-34062_69	RGVC2070	K02888	2. Genetic Information Processing	2.2 Translation	Ribosome	ko03010	RP-L21, MRPL21, rplU; large subunit ribosomal protein L21
2022NBT-3464_235	RGVC2107	K00969	1. Metabolism	1.8 Metabolism of cofactors and vitamins	Nicotinate and nicotinamide metabolism	ko00760	nadD; nicotinate-nucleotide adenylyltransferase [EC:2.7.7.18]
2022NBT-3464_235	RGVC2107	K00969	1. Metabolism	1.0 Global and overview maps	Metabolic pathways	ko01100	nadD; nicotinate-nucleotide adenylyltransferase [EC:2.7.7.18]
2022NBT-3464_260	RGVC2107	K00763	1. Metabolism	1.8 Metabolism of cofactors and vitamins	Nicotinate and nicotinamide metabolism	ko00760	pncB, NAPRT1; nicotinate phosphoribosyltransferase [EC:6.3.4.21]
2022NBT-3464_260	RGVC2107	K00763	1. Metabolism	1.0 Global and overview maps	Metabolic pathways	ko01100	pncB, NAPRT1; nicotinate phosphoribosyltransferase [EC:6.3.4.21]
2022NBT-3464_455	RGVC2107	K21636	1. Metabolism	1.4 Nucleotide metabolism	Purine metabolism	ko00230	nrdD; ribonucleoside-triphosphate reductase (formate) [EC:1.1.98.6]
2022NBT-3464_455	RGVC2107	K21636	1. Metabolism	1.4 Nucleotide metabolism	Pyrimidine metabolism	ko00240	nrdD; ribonucleoside-triphosphate reductase (formate) [EC:1.1.98.6]
2022NBT-3464_455	RGVC2107	K21636	1. Metabolism	1.0 Global and overview maps	Metabolic pathways	ko01100	nrdD; ribonucleoside-triphosphate reductase (formate) [EC:1.1.98.6]
2022NBT-38058_45	RGVC2298	K00558	1. Metabolism	1.5 Amino acid metabolism	Cysteine and methionine metabolism	ko00270	DNMT1, dcm; DNA (cytosine-5)-methyltransferase 1 [EC:2.1.1.37]
2022NBT-38058_45	RGVC2298	K00558	1. Metabolism	1.0 Global and overview maps	Metabolic pathways	ko01100	DNMT1, dcm; DNA (cytosine-5)-methyltransferase 1 [EC:2.1.1.37]
2022NBT-38058_45	RGVC2298	K00558	6. Human Diseases	6.1 Cancer: overview	MicroRNAs in cancer	ko05206	DNMT1, dcm; DNA (cytosine-5)-methyltransferase 1 [EC:2.1.1.37]
2022NBT-38695_1_31	RGVC2338	K00558	1. Metabolism	1.5 Amino acid metabolism	Cysteine and methionine metabolism	ko00270	DNMT1, dcm; DNA (cytosine-5)-methyltransferase 1 [EC:2.1.1.37]
2022NBT-38695_1_31	RGVC2338	K00558	1. Metabolism	1.0 Global and overview maps	Metabolic pathways	ko01100	DNMT1, dcm; DNA (cytosine-5)-methyltransferase 1 [EC:2.1.1.37]
2022NBT-38695_1_31	RGVC2338	K00558	6. Human Diseases	6.1 Cancer: overview	MicroRNAs in cancer	ko05206	DNMT1, dcm; DNA (cytosine-5)-methyltransferase 1 [EC:2.1.1.37]
2022NBT-389_601	RGVC2347	K00059	1. Metabolism	1.3 Lipid metabolism	Fatty acid biosynthesis	ko00061	fabG, OAR1; 3-oxoacyl-[acyl-carrier protein] reductase [EC:1.1.1.100]
2022NBT-389_601	RGVC2347	K00059	1. Metabolism	1.10 Biosynthesis of other secondary metabolites	Prodigiosin biosynthesis	ko00333	fabG, OAR1; 3-oxoacyl-[acyl-carrier protein] reductase [EC:1.1.1.100]
2022NBT-389_601	RGVC2347	K00059	1. Metabolism	1.8 Metabolism of cofactors and vitamins	Biotin metabolism	ko00780	fabG, OAR1; 3-oxoacyl-[acyl-carrier protein] reductase [EC:1.1.1.100]
2022NBT-389_601	RGVC2347	K00059	1. Metabolism	1.0 Global and overview maps	Metabolic pathways	ko01100	fabG, OAR1; 3-oxoacyl-[acyl-carrier protein] reductase [EC:1.1.1.100]
2022NBT-389_601	RGVC2347	K00059	1. Metabolism	1.0 Global and overview maps	Biosynthesis of secondary metabolites	ko01110	fabG, OAR1; 3-oxoacyl-[acyl-carrier protein] reductase [EC:1.1.1.100]
2022NBT-389_601	RGVC2347	K00059	1. Metabolism	1.0 Global and overview maps	Biosynthesis of antibiotics	ko01130	fabG, OAR1; 3-oxoacyl-[acyl-carrier protein] reductase [EC:1.1.1.100]
2022NBT-389_601	RGVC2347	K00059	1. Metabolism	1.0 Global and overview maps	Fatty acid metabolism	ko01212	fabG, OAR1; 3-oxoacyl-[acyl-carrier protein] reductase [EC:1.1.1.100]
2022NBT-404_1_34	RGVC2429	K00558	1. Metabolism	1.5 Amino acid metabolism	Cysteine and methionine metabolism	ko00270	DNMT1, dcm; DNA (cytosine-5)-methyltransferase 1 [EC:2.1.1.37]
2022NBT-404_1_34	RGVC2429	K00558	1. Metabolism	1.0 Global and overview maps	Metabolic pathways	ko01100	DNMT1, dcm; DNA (cytosine-5)-methyltransferase 1 [EC:2.1.1.37]
2022NBT-404_1_34	RGVC2429	K00558	6. Human Diseases	6.1 Cancer: overview	MicroRNAs in cancer	ko05206	DNMT1, dcm; DNA (cytosine-5)-methyltransferase 1 [EC:2.1.1.37]
2022NBT-42185_1_26	RGVC2547	K00558	1. Metabolism	1.5 Amino acid metabolism	Cysteine and methionine metabolism	ko00270	DNMT1, dcm; DNA (cytosine-5)-methyltransferase 1 [EC:2.1.1.37]
2022NBT-42185_1_26	RGVC2547	K00558	1. Metabolism	1.0 Global and overview maps	Metabolic pathways	ko01100	DNMT1, dcm; DNA (cytosine-5)-methyltransferase 1 [EC:2.1.1.37]
2022NBT-42185_1_26	RGVC2547	K00558	6. Human Diseases	6.1 Cancer: overview	MicroRNAs in cancer	ko05206	DNMT1, dcm; DNA (cytosine-5)-methyltransferase 1 [EC:2.1.1.37]
2022NBT-42598_1_32	RGVC2568	K01809	1. Metabolism	1.1 Carbohydrate metabolism	Fructose and mannose metabolism	ko00051	manA, MPI; mannose-6-phosphate isomerase [EC:5.3.1.8]
2022NBT-42598_1_32	RGVC2568	K01809	1. Metabolism	1.1 Carbohydrate metabolism	Amino sugar and nucleotide sugar metabolism	ko00520	manA, MPI; mannose-6-phosphate isomerase [EC:5.3.1.8]
2022NBT-42598_1_32	RGVC2568	K01809	1. Metabolism	1.0 Global and overview maps	Metabolic pathways	ko01100	manA, MPI; mannose-6-phosphate isomerase [EC:5.3.1.8]
2022NBT-42598_1_32	RGVC2568	K01809	1. Metabolism	1.0 Global and overview maps	Biosynthesis of secondary metabolites	ko01110	manA, MPI; mannose-6-phosphate isomerase [EC:5.3.1.8]
2022NBT-42598_1_32	RGVC2568	K01809	1. Metabolism	1.0 Global and overview maps	Biosynthesis of antibiotics	ko01130	manA, MPI; mannose-6-phosphate isomerase [EC:5.3.1.8]
2022NBT-42600_1_51	RGVC2570	K00789	1. Metabolism	1.5 Amino acid metabolism	Cysteine and methionine metabolism	ko00270	metK; S-adenosylmethionine synthetase [EC:2.5.1.6]
2022NBT-42600_1_51	RGVC2570	K00789	1. Metabolism	1.0 Global and overview maps	Metabolic pathways	ko01100	metK; S-adenosylmethionine synthetase [EC:2.5.1.6]
2022NBT-42600_1_51	RGVC2570	K00789	1. Metabolism	1.0 Global and overview maps	Biosynthesis of secondary metabolites	ko01110	metK; S-adenosylmethionine synthetase [EC:2.5.1.6]
2022NBT-42600_1_51	RGVC2570	K00789	1. Metabolism	1.0 Global and overview maps	Biosynthesis of amino acids	ko01230	metK; S-adenosylmethionine synthetase [EC:2.5.1.6]
2022NBT-43011_42	RGVC2602	K01495	1. Metabolism	1.8 Metabolism of cofactors and vitamins	Folate biosynthesis	ko00790	GCH1, folE; GTP cyclohydrolase IA [EC:3.5.4.16]
2022NBT-43011_42	RGVC2602	K01495	1. Metabolism	1.0 Global and overview maps	Metabolic pathways	ko01100	GCH1, folE; GTP cyclohydrolase IA [EC:3.5.4.16]
2022NBT-43011_45	RGVC2602	K01737	1. Metabolism	1.8 Metabolism of cofactors and vitamins	Folate biosynthesis	ko00790	queD, ptpS, PTS; 6-pyruvoyltetrahydropterin/6-carboxytetrahydropterin synthase [EC:4.2.3.12 4.1.2.50]
2022NBT-43011_45	RGVC2602	K01737	1. Metabolism	1.0 Global and overview maps	Metabolic pathways	ko01100	queD, ptpS, PTS; 6-pyruvoyltetrahydropterin/6-carboxytetrahydropterin synthase [EC:4.2.3.12 4.1.2.50]
2022NBT-4389_134	RGVC2664	K00969	1. Metabolism	1.8 Metabolism of cofactors and vitamins	Nicotinate and nicotinamide metabolism	ko00760	nadD; nicotinate-nucleotide adenylyltransferase [EC:2.7.7.18]
2022NBT-4389_134	RGVC2664	K00969	1. Metabolism	1.0 Global and overview maps	Metabolic pathways	ko01100	nadD; nicotinate-nucleotide adenylyltransferase [EC:2.7.7.18]
2022NBT-4389_68	RGVC2664	K01520	1. Metabolism	1.4 Nucleotide metabolism	Pyrimidine metabolism	ko00240	dut, DUT; dUTP pyrophosphatase [EC:3.6.1.23]
2022NBT-4389_68	RGVC2664	K01520	1. Metabolism	1.11 Xenobiotics biodegradation and metabolism	Drug metabolism - other enzymes	ko00983	dut, DUT; dUTP pyrophosphatase [EC:3.6.1.23]
2022NBT-4389_68	RGVC2664	K01520	1. Metabolism	1.0 Global and overview maps	Metabolic pathways	ko01100	dut, DUT; dUTP pyrophosphatase [EC:3.6.1.23]
2022NBT-4389_69	RGVC2664	K01520	1. Metabolism	1.4 Nucleotide metabolism	Pyrimidine metabolism	ko00240	dut, DUT; dUTP pyrophosphatase [EC:3.6.1.23]
2022NBT-4389_69	RGVC2664	K01520	1. Metabolism	1.11 Xenobiotics biodegradation and metabolism	Drug metabolism - other enzymes	ko00983	dut, DUT; dUTP pyrophosphatase [EC:3.6.1.23]
2022NBT-4389_69	RGVC2664	K01520	1. Metabolism	1.0 Global and overview maps	Metabolic pathways	ko01100	dut, DUT; dUTP pyrophosphatase [EC:3.6.1.23]
2022NBT-4389_97	RGVC2664	K21636	1. Metabolism	1.4 Nucleotide metabolism	Purine metabolism	ko00230	nrdD; ribonucleoside-triphosphate reductase (formate) [EC:1.1.98.6]
2022NBT-4389_97	RGVC2664	K21636	1. Metabolism	1.4 Nucleotide metabolism	Pyrimidine metabolism	ko00240	nrdD; ribonucleoside-triphosphate reductase (formate) [EC:1.1.98.6]
2022NBT-4389_97	RGVC2664	K21636	1. Metabolism	1.0 Global and overview maps	Metabolic pathways	ko01100	nrdD; ribonucleoside-triphosphate reductase (formate) [EC:1.1.98.6]
2022NBT-4464_261	RGVC2706	K02078	1. Metabolism	1.10 Biosynthesis of other secondary metabolites	Biosynthesis of various secondary metabolites - part 2	ko00998	acpP; acyl carrier protein
2022NBT-4464_261	RGVC2706	K02078	1. Metabolism	1.0 Global and overview maps	Metabolic pathways	ko01100	acpP; acyl carrier protein
2022NBT-4464_261	RGVC2706	K02078	1. Metabolism	1.0 Global and overview maps	Biosynthesis of secondary metabolites	ko01110	acpP; acyl carrier protein
2022NBT-4464_261	RGVC2706	K02078	1. Metabolism	1.0 Global and overview maps	Biosynthesis of antibiotics	ko01130	acpP; acyl carrier protein
2022NBT-49830_18	RGVC2997	K00558	1. Metabolism	1.5 Amino acid metabolism	Cysteine and methionine metabolism	ko00270	DNMT1, dcm; DNA (cytosine-5)-methyltransferase 1 [EC:2.1.1.37]
2022NBT-49830_18	RGVC2997	K00558	1. Metabolism	1.0 Global and overview maps	Metabolic pathways	ko01100	DNMT1, dcm; DNA (cytosine-5)-methyltransferase 1 [EC:2.1.1.37]
2022NBT-49830_18	RGVC2997	K00558	6. Human Diseases	6.1 Cancer: overview	MicroRNAs in cancer	ko05206	DNMT1, dcm; DNA (cytosine-5)-methyltransferase 1 [EC:2.1.1.37]
2022NBT-5023_121	RGVC3011	K01190	1. Metabolism	1.1 Carbohydrate metabolism	Galactose metabolism	ko00052	lacZ; beta-galactosidase [EC:3.2.1.23]
2022NBT-5023_121	RGVC3011	K01190	1. Metabolism	1.7 Glycan biosynthesis and metabolism	Other glycan degradation	ko00511	lacZ; beta-galactosidase [EC:3.2.1.23]
2022NBT-5023_121	RGVC3011	K01190	1. Metabolism	1.3 Lipid metabolism	Sphingolipid metabolism	ko00600	lacZ; beta-galactosidase [EC:3.2.1.23]
2022NBT-5023_121	RGVC3011	K01190	1. Metabolism	1.0 Global and overview maps	Metabolic pathways	ko01100	lacZ; beta-galactosidase [EC:3.2.1.23]
2022NBT-5023_125	RGVC3011	K01520	1. Metabolism	1.4 Nucleotide metabolism	Pyrimidine metabolism	ko00240	dut, DUT; dUTP pyrophosphatase [EC:3.6.1.23]
2022NBT-5023_125	RGVC3011	K01520	1. Metabolism	1.11 Xenobiotics biodegradation and metabolism	Drug metabolism - other enzymes	ko00983	dut, DUT; dUTP pyrophosphatase [EC:3.6.1.23]
2022NBT-5023_125	RGVC3011	K01520	1. Metabolism	1.0 Global and overview maps	Metabolic pathways	ko01100	dut, DUT; dUTP pyrophosphatase [EC:3.6.1.23]
2022NBT-52125_61	RGVC3104	K02040	3. Environmental Information Processing	3.1 Membrane transport	ABC transporters	ko02010	pstS; phosphate transport system substrate-binding protein
2022NBT-52125_61	RGVC3104	K02040	3. Environmental Information Processing	3.2 Signal transduction	Two-component system	ko02020	pstS; phosphate transport system substrate-binding protein
2022NBT-52125_61	RGVC3104	K02040	6. Human Diseases	6.8 Infectious disease: bacterial	Tuberculosis	ko05152	pstS; phosphate transport system substrate-binding protein
2022NBT-539_1_19	RGVC3200	K00558	1. Metabolism	1.5 Amino acid metabolism	Cysteine and methionine metabolism	ko00270	DNMT1, dcm; DNA (cytosine-5)-methyltransferase 1 [EC:2.1.1.37]
2022NBT-539_1_19	RGVC3200	K00558	1. Metabolism	1.0 Global and overview maps	Metabolic pathways	ko01100	DNMT1, dcm; DNA (cytosine-5)-methyltransferase 1 [EC:2.1.1.37]
2022NBT-539_1_19	RGVC3200	K00558	6. Human Diseases	6.1 Cancer: overview	MicroRNAs in cancer	ko05206	DNMT1, dcm; DNA (cytosine-5)-methyltransferase 1 [EC:2.1.1.37]
2022NBT-57427_17	RGVC3409	K00558	1. Metabolism	1.5 Amino acid metabolism	Cysteine and methionine metabolism	ko00270	DNMT1, dcm; DNA (cytosine-5)-methyltransferase 1 [EC:2.1.1.37]
2022NBT-57427_17	RGVC3409	K00558	1. Metabolism	1.0 Global and overview maps	Metabolic pathways	ko01100	DNMT1, dcm; DNA (cytosine-5)-methyltransferase 1 [EC:2.1.1.37]
2022NBT-57427_17	RGVC3409	K00558	6. Human Diseases	6.1 Cancer: overview	MicroRNAs in cancer	ko05206	DNMT1, dcm; DNA (cytosine-5)-methyltransferase 1 [EC:2.1.1.37]
2022NBT-57427_19	RGVC3409	K00558	1. Metabolism	1.5 Amino acid metabolism	Cysteine and methionine metabolism	ko00270	DNMT1, dcm; DNA (cytosine-5)-methyltransferase 1 [EC:2.1.1.37]
2022NBT-57427_19	RGVC3409	K00558	1. Metabolism	1.0 Global and overview maps	Metabolic pathways	ko01100	DNMT1, dcm; DNA (cytosine-5)-methyltransferase 1 [EC:2.1.1.37]
2022NBT-57427_19	RGVC3409	K00558	6. Human Diseases	6.1 Cancer: overview	MicroRNAs in cancer	ko05206	DNMT1, dcm; DNA (cytosine-5)-methyltransferase 1 [EC:2.1.1.37]
2022NBT-5841_306	RGVC3483	K03462	1. Metabolism	1.8 Metabolism of cofactors and vitamins	Nicotinate and nicotinamide metabolism	ko00760	NAMPT; nicotinamide phosphoribosyltransferase [EC:2.4.2.12]
2022NBT-5841_306	RGVC3483	K03462	1. Metabolism	1.0 Global and overview maps	Metabolic pathways	ko01100	NAMPT; nicotinamide phosphoribosyltransferase [EC:2.4.2.12]
2022NBT-5841_306	RGVC3483	K03462	5. Organismal Systems	5.1 Immune system	NOD-like receptor signaling pathway	ko04621	NAMPT; nicotinamide phosphoribosyltransferase [EC:2.4.2.12]
2022NBT-5841_342	RGVC3483	K00560	1. Metabolism	1.4 Nucleotide metabolism	Pyrimidine metabolism	ko00240	thyA, TYMS; thymidylate synthase [EC:2.1.1.45]
2022NBT-5841_342	RGVC3483	K00560	1. Metabolism	1.8 Metabolism of cofactors and vitamins	One carbon pool by folate	ko00670	thyA, TYMS; thymidylate synthase [EC:2.1.1.45]
2022NBT-5841_342	RGVC3483	K00560	1. Metabolism	1.0 Global and overview maps	Metabolic pathways	ko01100	thyA, TYMS; thymidylate synthase [EC:2.1.1.45]
2022NBT-5841_342	RGVC3483	K00560	6. Human Diseases	6.12 Drug resistance: antineoplastic	Antifolate resistance	ko01523	thyA, TYMS; thymidylate synthase [EC:2.1.1.45]
2022NBT-5841_36	RGVC3483	K00560	1. Metabolism	1.4 Nucleotide metabolism	Pyrimidine metabolism	ko00240	thyA, TYMS; thymidylate synthase [EC:2.1.1.45]
2022NBT-5841_36	RGVC3483	K00560	1. Metabolism	1.8 Metabolism of cofactors and vitamins	One carbon pool by folate	ko00670	thyA, TYMS; thymidylate synthase [EC:2.1.1.45]
2022NBT-5841_36	RGVC3483	K00560	1. Metabolism	1.0 Global and overview maps	Metabolic pathways	ko01100	thyA, TYMS; thymidylate synthase [EC:2.1.1.45]
2022NBT-5841_36	RGVC3483	K00560	6. Human Diseases	6.12 Drug resistance: antineoplastic	Antifolate resistance	ko01523	thyA, TYMS; thymidylate synthase [EC:2.1.1.45]
2022NBT-5857_1_63	RGVC3494	K03462	1. Metabolism	1.8 Metabolism of cofactors and vitamins	Nicotinate and nicotinamide metabolism	ko00760	NAMPT; nicotinamide phosphoribosyltransferase [EC:2.4.2.12]
2022NBT-5857_1_63	RGVC3494	K03462	1. Metabolism	1.0 Global and overview maps	Metabolic pathways	ko01100	NAMPT; nicotinamide phosphoribosyltransferase [EC:2.4.2.12]
2022NBT-5857_1_63	RGVC3494	K03462	5. Organismal Systems	5.1 Immune system	NOD-like receptor signaling pathway	ko04621	NAMPT; nicotinamide phosphoribosyltransferase [EC:2.4.2.12]
2022NBT-62290_34	RGVC3713	K00558	1. Metabolism	1.5 Amino acid metabolism	Cysteine and methionine metabolism	ko00270	DNMT1, dcm; DNA (cytosine-5)-methyltransferase 1 [EC:2.1.1.37]
2022NBT-62290_34	RGVC3713	K00558	1. Metabolism	1.0 Global and overview maps	Metabolic pathways	ko01100	DNMT1, dcm; DNA (cytosine-5)-methyltransferase 1 [EC:2.1.1.37]
2022NBT-62290_34	RGVC3713	K00558	6. Human Diseases	6.1 Cancer: overview	MicroRNAs in cancer	ko05206	DNMT1, dcm; DNA (cytosine-5)-methyltransferase 1 [EC:2.1.1.37]
2022NBT-66557_47	RGVC4001	K01520	1. Metabolism	1.4 Nucleotide metabolism	Pyrimidine metabolism	ko00240	dut, DUT; dUTP pyrophosphatase [EC:3.6.1.23]
2022NBT-66557_47	RGVC4001	K01520	1. Metabolism	1.11 Xenobiotics biodegradation and metabolism	Drug metabolism - other enzymes	ko00983	dut, DUT; dUTP pyrophosphatase [EC:3.6.1.23]
2022NBT-66557_47	RGVC4001	K01520	1. Metabolism	1.0 Global and overview maps	Metabolic pathways	ko01100	dut, DUT; dUTP pyrophosphatase [EC:3.6.1.23]
2022NBT-67676_51	RGVC4075	K01520	1. Metabolism	1.4 Nucleotide metabolism	Pyrimidine metabolism	ko00240	dut, DUT; dUTP pyrophosphatase [EC:3.6.1.23]
2022NBT-67676_51	RGVC4075	K01520	1. Metabolism	1.11 Xenobiotics biodegradation and metabolism	Drug metabolism - other enzymes	ko00983	dut, DUT; dUTP pyrophosphatase [EC:3.6.1.23]
2022NBT-67676_51	RGVC4075	K01520	1. Metabolism	1.0 Global and overview maps	Metabolic pathways	ko01100	dut, DUT; dUTP pyrophosphatase [EC:3.6.1.23]
2022NBT-6951_34	RGVC4207	K01938	1. Metabolism	1.8 Metabolism of cofactors and vitamins	One carbon pool by folate	ko00670	fhs; formate--tetrahydrofolate ligase [EC:6.3.4.3]
2022NBT-6951_34	RGVC4207	K01938	1. Metabolism	1.2 Energy metabolism	Carbon fixation pathways in prokaryotes	ko00720	fhs; formate--tetrahydrofolate ligase [EC:6.3.4.3]
2022NBT-6951_34	RGVC4207	K01938	1. Metabolism	1.0 Global and overview maps	Metabolic pathways	ko01100	fhs; formate--tetrahydrofolate ligase [EC:6.3.4.3]
2022NBT-6951_34	RGVC4207	K01938	1. Metabolism	1.0 Global and overview maps	Microbial metabolism in diverse environments	ko01120	fhs; formate--tetrahydrofolate ligase [EC:6.3.4.3]
2022NBT-6951_34	RGVC4207	K01938	1. Metabolism	1.0 Global and overview maps	Carbon metabolism	ko01200	fhs; formate--tetrahydrofolate ligase [EC:6.3.4.3]
2022NBT-7030_1_29	RGVC4254	K00558	1. Metabolism	1.5 Amino acid metabolism	Cysteine and methionine metabolism	ko00270	DNMT1, dcm; DNA (cytosine-5)-methyltransferase 1 [EC:2.1.1.37]
2022NBT-7030_1_29	RGVC4254	K00558	1. Metabolism	1.0 Global and overview maps	Metabolic pathways	ko01100	DNMT1, dcm; DNA (cytosine-5)-methyltransferase 1 [EC:2.1.1.37]
2022NBT-7030_1_29	RGVC4254	K00558	6. Human Diseases	6.1 Cancer: overview	MicroRNAs in cancer	ko05206	DNMT1, dcm; DNA (cytosine-5)-methyltransferase 1 [EC:2.1.1.37]
2022NBT-711_380	RGVC4308	K22605	1. Metabolism	1.3 Lipid metabolism	Secondary bile acid biosynthesis	ko00121	baiA; 3alpha-hydroxycholanate dehydrogenase (NADP+) [EC:1.1.1.392]
2022NBT-723_1_16	RGVC4373	K01494	1. Metabolism	1.4 Nucleotide metabolism	Pyrimidine metabolism	ko00240	dcd; dCTP deaminase [EC:3.5.4.13]
2022NBT-723_1_16	RGVC4373	K01494	1. Metabolism	1.0 Global and overview maps	Metabolic pathways	ko01100	dcd; dCTP deaminase [EC:3.5.4.13]
2022NBT-723_1_34	RGVC4373	K21636	1. Metabolism	1.4 Nucleotide metabolism	Purine metabolism	ko00230	nrdD; ribonucleoside-triphosphate reductase (formate) [EC:1.1.98.6]
2022NBT-723_1_34	RGVC4373	K21636	1. Metabolism	1.4 Nucleotide metabolism	Pyrimidine metabolism	ko00240	nrdD; ribonucleoside-triphosphate reductase (formate) [EC:1.1.98.6]
2022NBT-723_1_34	RGVC4373	K21636	1. Metabolism	1.0 Global and overview maps	Metabolic pathways	ko01100	nrdD; ribonucleoside-triphosphate reductase (formate) [EC:1.1.98.6]
2022NBT-8861_1_203	RGVC4992	K00789	1. Metabolism	1.5 Amino acid metabolism	Cysteine and methionine metabolism	ko00270	metK; S-adenosylmethionine synthetase [EC:2.5.1.6]
2022NBT-8861_1_203	RGVC4992	K00789	1. Metabolism	1.0 Global and overview maps	Metabolic pathways	ko01100	metK; S-adenosylmethionine synthetase [EC:2.5.1.6]
2022NBT-8861_1_203	RGVC4992	K00789	1. Metabolism	1.0 Global and overview maps	Biosynthesis of secondary metabolites	ko01110	metK; S-adenosylmethionine synthetase [EC:2.5.1.6]
2022NBT-8861_1_203	RGVC4992	K00789	1. Metabolism	1.0 Global and overview maps	Biosynthesis of amino acids	ko01230	metK; S-adenosylmethionine synthetase [EC:2.5.1.6]
2022NBT-8861_1_204	RGVC4992	K00789	1. Metabolism	1.5 Amino acid metabolism	Cysteine and methionine metabolism	ko00270	metK; S-adenosylmethionine synthetase [EC:2.5.1.6]
2022NBT-8861_1_204	RGVC4992	K00789	1. Metabolism	1.0 Global and overview maps	Metabolic pathways	ko01100	metK; S-adenosylmethionine synthetase [EC:2.5.1.6]
2022NBT-8861_1_204	RGVC4992	K00789	1. Metabolism	1.0 Global and overview maps	Biosynthesis of secondary metabolites	ko01110	metK; S-adenosylmethionine synthetase [EC:2.5.1.6]
2022NBT-8861_1_204	RGVC4992	K00789	1. Metabolism	1.0 Global and overview maps	Biosynthesis of amino acids	ko01230	metK; S-adenosylmethionine synthetase [EC:2.5.1.6]
2022NBT-9244_1_27	RGVC5096	K01520	1. Metabolism	1.4 Nucleotide metabolism	Pyrimidine metabolism	ko00240	dut, DUT; dUTP pyrophosphatase [EC:3.6.1.23]
2022NBT-9244_1_27	RGVC5096	K01520	1. Metabolism	1.11 Xenobiotics biodegradation and metabolism	Drug metabolism - other enzymes	ko00983	dut, DUT; dUTP pyrophosphatase [EC:3.6.1.23]
2022NBT-9244_1_27	RGVC5096	K01520	1. Metabolism	1.0 Global and overview maps	Metabolic pathways	ko01100	dut, DUT; dUTP pyrophosphatase [EC:3.6.1.23]
contig_22452_436	RGVC6312	K01520	1. Metabolism	1.4 Nucleotide metabolism	Pyrimidine metabolism	ko00240	dut, DUT; dUTP pyrophosphatase [EC:3.6.1.23]
contig_22452_436	RGVC6312	K01520	1. Metabolism	1.11 Xenobiotics biodegradation and metabolism	Drug metabolism - other enzymes	ko00983	dut, DUT; dUTP pyrophosphatase [EC:3.6.1.23]
contig_22452_436	RGVC6312	K01520	1. Metabolism	1.0 Global and overview maps	Metabolic pathways	ko01100	dut, DUT; dUTP pyrophosphatase [EC:3.6.1.23]
contig_22452_97	RGVC6312	K00789	1. Metabolism	1.5 Amino acid metabolism	Cysteine and methionine metabolism	ko00270	metK; S-adenosylmethionine synthetase [EC:2.5.1.6]
contig_22452_97	RGVC6312	K00789	1. Metabolism	1.0 Global and overview maps	Metabolic pathways	ko01100	metK; S-adenosylmethionine synthetase [EC:2.5.1.6]
contig_22452_97	RGVC6312	K00789	1. Metabolism	1.0 Global and overview maps	Biosynthesis of secondary metabolites	ko01110	metK; S-adenosylmethionine synthetase [EC:2.5.1.6]
contig_22452_97	RGVC6312	K00789	1. Metabolism	1.0 Global and overview maps	Biosynthesis of amino acids	ko01230	metK; S-adenosylmethionine synthetase [EC:2.5.1.6]
contig_22452_98	RGVC6312	K00789	1. Metabolism	1.5 Amino acid metabolism	Cysteine and methionine metabolism	ko00270	metK; S-adenosylmethionine synthetase [EC:2.5.1.6]
contig_22452_98	RGVC6312	K00789	1. Metabolism	1.0 Global and overview maps	Metabolic pathways	ko01100	metK; S-adenosylmethionine synthetase [EC:2.5.1.6]
contig_22452_98	RGVC6312	K00789	1. Metabolism	1.0 Global and overview maps	Biosynthesis of secondary metabolites	ko01110	metK; S-adenosylmethionine synthetase [EC:2.5.1.6]
contig_22452_98	RGVC6312	K00789	1. Metabolism	1.0 Global and overview maps	Biosynthesis of amino acids	ko01230	metK; S-adenosylmethionine synthetase [EC:2.5.1.6]
Dairy_cattle_Cecum-6__c1179419_40	RGVC7606	K21636	1. Metabolism	1.4 Nucleotide metabolism	Purine metabolism	ko00230	nrdD; ribonucleoside-triphosphate reductase (formate) [EC:1.1.98.6]
Dairy_cattle_Cecum-6__c1179419_40	RGVC7606	K21636	1. Metabolism	1.4 Nucleotide metabolism	Pyrimidine metabolism	ko00240	nrdD; ribonucleoside-triphosphate reductase (formate) [EC:1.1.98.6]
Dairy_cattle_Cecum-6__c1179419_40	RGVC7606	K21636	1. Metabolism	1.0 Global and overview maps	Metabolic pathways	ko01100	nrdD; ribonucleoside-triphosphate reductase (formate) [EC:1.1.98.6]
Dairy_cattle_Cecum-6__c1179419_44	RGVC7606	K01520	1. Metabolism	1.4 Nucleotide metabolism	Pyrimidine metabolism	ko00240	dut, DUT; dUTP pyrophosphatase [EC:3.6.1.23]
Dairy_cattle_Cecum-6__c1179419_44	RGVC7606	K01520	1. Metabolism	1.11 Xenobiotics biodegradation and metabolism	Drug metabolism - other enzymes	ko00983	dut, DUT; dUTP pyrophosphatase [EC:3.6.1.23]
Dairy_cattle_Cecum-6__c1179419_44	RGVC7606	K01520	1. Metabolism	1.0 Global and overview maps	Metabolic pathways	ko01100	dut, DUT; dUTP pyrophosphatase [EC:3.6.1.23]
Dairy_cattle_Cecum-6__c622_241	RGVC7622	K00969	1. Metabolism	1.8 Metabolism of cofactors and vitamins	Nicotinate and nicotinamide metabolism	ko00760	nadD; nicotinate-nucleotide adenylyltransferase [EC:2.7.7.18]
Dairy_cattle_Cecum-6__c622_241	RGVC7622	K00969	1. Metabolism	1.0 Global and overview maps	Metabolic pathways	ko01100	nadD; nicotinate-nucleotide adenylyltransferase [EC:2.7.7.18]
Dairy_cattle_Cecum-6__c622_244	RGVC7622	K00763	1. Metabolism	1.8 Metabolism of cofactors and vitamins	Nicotinate and nicotinamide metabolism	ko00760	pncB, NAPRT1; nicotinate phosphoribosyltransferase [EC:6.3.4.21]
Dairy_cattle_Cecum-6__c622_244	RGVC7622	K00763	1. Metabolism	1.0 Global and overview maps	Metabolic pathways	ko01100	pncB, NAPRT1; nicotinate phosphoribosyltransferase [EC:6.3.4.21]
Dairy_cattle_Cecum-6__c622_262	RGVC7622	K02406	3. Environmental Information Processing	3.2 Signal transduction	Two-component system	ko02020	fliC; flagellin
Dairy_cattle_Cecum-6__c622_262	RGVC7622	K02406	4. Cellular Processes	4.5 Cell motility	Flagellar assembly	ko02040	fliC; flagellin
Dairy_cattle_Cecum-6__c622_262	RGVC7622	K02406	5. Organismal Systems	5.1 Immune system	NOD-like receptor signaling pathway	ko04621	fliC; flagellin
Dairy_cattle_Cecum-6__c622_262	RGVC7622	K02406	5. Organismal Systems	5.10 Environmental adaptation	Plant-pathogen interaction	ko04626	fliC; flagellin
Dairy_cattle_Cecum-6__c622_262	RGVC7622	K02406	6. Human Diseases	6.8 Infectious disease: bacterial	Shigellosis	ko05131	fliC; flagellin
Dairy_cattle_Cecum-6__c622_262	RGVC7622	K02406	6. Human Diseases	6.8 Infectious disease: bacterial	Salmonella infection	ko05132	fliC; flagellin
Dairy_cattle_Cecum-6__c622_262	RGVC7622	K02406	6. Human Diseases	6.8 Infectious disease: bacterial	Legionellosis	ko05134	fliC; flagellin
Dairy_cattle_Cecum-6__c622_312	RGVC7622	K01520	1. Metabolism	1.4 Nucleotide metabolism	Pyrimidine metabolism	ko00240	dut, DUT; dUTP pyrophosphatase [EC:3.6.1.23]
Dairy_cattle_Cecum-6__c622_312	RGVC7622	K01520	1. Metabolism	1.11 Xenobiotics biodegradation and metabolism	Drug metabolism - other enzymes	ko00983	dut, DUT; dUTP pyrophosphatase [EC:3.6.1.23]
Dairy_cattle_Cecum-6__c622_312	RGVC7622	K01520	1. Metabolism	1.0 Global and overview maps	Metabolic pathways	ko01100	dut, DUT; dUTP pyrophosphatase [EC:3.6.1.23]
Dairy_cattle_Cecum-6__c622_39	RGVC7622	K21636	1. Metabolism	1.4 Nucleotide metabolism	Purine metabolism	ko00230	nrdD; ribonucleoside-triphosphate reductase (formate) [EC:1.1.98.6]
Dairy_cattle_Cecum-6__c622_39	RGVC7622	K21636	1. Metabolism	1.4 Nucleotide metabolism	Pyrimidine metabolism	ko00240	nrdD; ribonucleoside-triphosphate reductase (formate) [EC:1.1.98.6]
Dairy_cattle_Cecum-6__c622_39	RGVC7622	K21636	1. Metabolism	1.0 Global and overview maps	Metabolic pathways	ko01100	nrdD; ribonucleoside-triphosphate reductase (formate) [EC:1.1.98.6]
Dairy_cattle_Colon-2__c590289_71	RGVC7677	K01520	1. Metabolism	1.4 Nucleotide metabolism	Pyrimidine metabolism	ko00240	dut, DUT; dUTP pyrophosphatase [EC:3.6.1.23]
Dairy_cattle_Colon-2__c590289_71	RGVC7677	K01520	1. Metabolism	1.11 Xenobiotics biodegradation and metabolism	Drug metabolism - other enzymes	ko00983	dut, DUT; dUTP pyrophosphatase [EC:3.6.1.23]
Dairy_cattle_Colon-2__c590289_71	RGVC7677	K01520	1. Metabolism	1.0 Global and overview maps	Metabolic pathways	ko01100	dut, DUT; dUTP pyrophosphatase [EC:3.6.1.23]
Dairy_cattle_Colon-3__c464966_37	RGVC7719	K01520	1. Metabolism	1.4 Nucleotide metabolism	Pyrimidine metabolism	ko00240	dut, DUT; dUTP pyrophosphatase [EC:3.6.1.23]
Dairy_cattle_Colon-3__c464966_37	RGVC7719	K01520	1. Metabolism	1.11 Xenobiotics biodegradation and metabolism	Drug metabolism - other enzymes	ko00983	dut, DUT; dUTP pyrophosphatase [EC:3.6.1.23]
Dairy_cattle_Colon-3__c464966_37	RGVC7719	K01520	1. Metabolism	1.0 Global and overview maps	Metabolic pathways	ko01100	dut, DUT; dUTP pyrophosphatase [EC:3.6.1.23]
Dairy_cattle_Colon-3__c50789_24	RGVC7722	K21636	1. Metabolism	1.4 Nucleotide metabolism	Purine metabolism	ko00230	nrdD; ribonucleoside-triphosphate reductase (formate) [EC:1.1.98.6]
Dairy_cattle_Colon-3__c50789_24	RGVC7722	K21636	1. Metabolism	1.4 Nucleotide metabolism	Pyrimidine metabolism	ko00240	nrdD; ribonucleoside-triphosphate reductase (formate) [EC:1.1.98.6]
Dairy_cattle_Colon-3__c50789_24	RGVC7722	K21636	1. Metabolism	1.0 Global and overview maps	Metabolic pathways	ko01100	nrdD; ribonucleoside-triphosphate reductase (formate) [EC:1.1.98.6]
Dairy_cattle_Colon-3__c50789_27	RGVC7722	K01520	1. Metabolism	1.4 Nucleotide metabolism	Pyrimidine metabolism	ko00240	dut, DUT; dUTP pyrophosphatase [EC:3.6.1.23]
Dairy_cattle_Colon-3__c50789_27	RGVC7722	K01520	1. Metabolism	1.11 Xenobiotics biodegradation and metabolism	Drug metabolism - other enzymes	ko00983	dut, DUT; dUTP pyrophosphatase [EC:3.6.1.23]
Dairy_cattle_Colon-3__c50789_27	RGVC7722	K01520	1. Metabolism	1.0 Global and overview maps	Metabolic pathways	ko01100	dut, DUT; dUTP pyrophosphatase [EC:3.6.1.23]
Dairy_cattle_Colon-4__c197293_28	RGVC7756	K00558	1. Metabolism	1.5 Amino acid metabolism	Cysteine and methionine metabolism	ko00270	DNMT1, dcm; DNA (cytosine-5)-methyltransferase 1 [EC:2.1.1.37]
Dairy_cattle_Colon-4__c197293_28	RGVC7756	K00558	1. Metabolism	1.0 Global and overview maps	Metabolic pathways	ko01100	DNMT1, dcm; DNA (cytosine-5)-methyltransferase 1 [EC:2.1.1.37]
Dairy_cattle_Colon-4__c197293_28	RGVC7756	K00558	6. Human Diseases	6.1 Cancer: overview	MicroRNAs in cancer	ko05206	DNMT1, dcm; DNA (cytosine-5)-methyltransferase 1 [EC:2.1.1.37]
Dairy_cattle_Colon-5__c687864_31	RGVC7875	K01520	1. Metabolism	1.4 Nucleotide metabolism	Pyrimidine metabolism	ko00240	dut, DUT; dUTP pyrophosphatase [EC:3.6.1.23]
Dairy_cattle_Colon-5__c687864_31	RGVC7875	K01520	1. Metabolism	1.11 Xenobiotics biodegradation and metabolism	Drug metabolism - other enzymes	ko00983	dut, DUT; dUTP pyrophosphatase [EC:3.6.1.23]
Dairy_cattle_Colon-5__c687864_31	RGVC7875	K01520	1. Metabolism	1.0 Global and overview maps	Metabolic pathways	ko01100	dut, DUT; dUTP pyrophosphatase [EC:3.6.1.23]
Dairy_cattle_Duodenum-3__c1203_16	RGVC8434	K01520	1. Metabolism	1.4 Nucleotide metabolism	Pyrimidine metabolism	ko00240	dut, DUT; dUTP pyrophosphatase [EC:3.6.1.23]
Dairy_cattle_Duodenum-3__c1203_16	RGVC8434	K01520	1. Metabolism	1.11 Xenobiotics biodegradation and metabolism	Drug metabolism - other enzymes	ko00983	dut, DUT; dUTP pyrophosphatase [EC:3.6.1.23]
Dairy_cattle_Duodenum-3__c1203_16	RGVC8434	K01520	1. Metabolism	1.0 Global and overview maps	Metabolic pathways	ko01100	dut, DUT; dUTP pyrophosphatase [EC:3.6.1.23]
Dairy_cattle_Duodenum-3__c831492_7	RGVC9391	K01520	1. Metabolism	1.4 Nucleotide metabolism	Pyrimidine metabolism	ko00240	dut, DUT; dUTP pyrophosphatase [EC:3.6.1.23]
Dairy_cattle_Duodenum-3__c831492_7	RGVC9391	K01520	1. Metabolism	1.11 Xenobiotics biodegradation and metabolism	Drug metabolism - other enzymes	ko00983	dut, DUT; dUTP pyrophosphatase [EC:3.6.1.23]
Dairy_cattle_Duodenum-3__c831492_7	RGVC9391	K01520	1. Metabolism	1.0 Global and overview maps	Metabolic pathways	ko01100	dut, DUT; dUTP pyrophosphatase [EC:3.6.1.23]
Dairy_cattle_Jejunum-1__c552740_180	RGVC9933	K01710	1. Metabolism	1.10 Biosynthesis of other secondary metabolites	Streptomycin biosynthesis	ko00521	rfbB, rmlB, rffG; dTDP-glucose 4,6-dehydratase [EC:4.2.1.46]
Dairy_cattle_Jejunum-1__c552740_180	RGVC9933	K01710	1. Metabolism	1.9 Metabolism of terpenoids and polyketides	Polyketide sugar unit biosynthesis	ko00523	rfbB, rmlB, rffG; dTDP-glucose 4,6-dehydratase [EC:4.2.1.46]
Dairy_cattle_Jejunum-1__c552740_180	RGVC9933	K01710	1. Metabolism	1.10 Biosynthesis of other secondary metabolites	Acarbose and validamycin biosynthesis	ko00525	rfbB, rmlB, rffG; dTDP-glucose 4,6-dehydratase [EC:4.2.1.46]
Dairy_cattle_Jejunum-1__c552740_180	RGVC9933	K01710	1. Metabolism	1.9 Metabolism of terpenoids and polyketides	Biosynthesis of vancomycin group antibiotics	ko01055	rfbB, rmlB, rffG; dTDP-glucose 4,6-dehydratase [EC:4.2.1.46]
Dairy_cattle_Jejunum-1__c552740_180	RGVC9933	K01710	1. Metabolism	1.0 Global and overview maps	Metabolic pathways	ko01100	rfbB, rmlB, rffG; dTDP-glucose 4,6-dehydratase [EC:4.2.1.46]
Dairy_cattle_Jejunum-1__c552740_180	RGVC9933	K01710	1. Metabolism	1.0 Global and overview maps	Biosynthesis of secondary metabolites	ko01110	rfbB, rmlB, rffG; dTDP-glucose 4,6-dehydratase [EC:4.2.1.46]
Dairy_cattle_Jejunum-1__c552740_180	RGVC9933	K01710	1. Metabolism	1.0 Global and overview maps	Biosynthesis of antibiotics	ko01130	rfbB, rmlB, rffG; dTDP-glucose 4,6-dehydratase [EC:4.2.1.46]
Dairy_cattle_Jejunum-1__c552740_239	RGVC9933	K01520	1. Metabolism	1.4 Nucleotide metabolism	Pyrimidine metabolism	ko00240	dut, DUT; dUTP pyrophosphatase [EC:3.6.1.23]
Dairy_cattle_Jejunum-1__c552740_239	RGVC9933	K01520	1. Metabolism	1.11 Xenobiotics biodegradation and metabolism	Drug metabolism - other enzymes	ko00983	dut, DUT; dUTP pyrophosphatase [EC:3.6.1.23]
Dairy_cattle_Jejunum-1__c552740_239	RGVC9933	K01520	1. Metabolism	1.0 Global and overview maps	Metabolic pathways	ko01100	dut, DUT; dUTP pyrophosphatase [EC:3.6.1.23]
Dairy_cattle_Jejunum-1__c552740_245	RGVC9933	K02970	2. Genetic Information Processing	2.2 Translation	Ribosome	ko03010	RP-S21, MRPS21, rpsU; small subunit ribosomal protein S21
Dairy_cattle_Jejunum-1__c552740_253	RGVC9933	K00600	1. Metabolism	1.5 Amino acid metabolism	Glycine, serine and threonine metabolism	ko00260	glyA, SHMT; glycine hydroxymethyltransferase [EC:2.1.2.1]
Dairy_cattle_Jejunum-1__c552740_253	RGVC9933	K00600	1. Metabolism	1.6 Metabolism of other amino acids	Cyanoamino acid metabolism	ko00460	glyA, SHMT; glycine hydroxymethyltransferase [EC:2.1.2.1]
Dairy_cattle_Jejunum-1__c552740_253	RGVC9933	K00600	1. Metabolism	1.1 Carbohydrate metabolism	Glyoxylate and dicarboxylate metabolism	ko00630	glyA, SHMT; glycine hydroxymethyltransferase [EC:2.1.2.1]
Dairy_cattle_Jejunum-1__c552740_253	RGVC9933	K00600	1. Metabolism	1.8 Metabolism of cofactors and vitamins	One carbon pool by folate	ko00670	glyA, SHMT; glycine hydroxymethyltransferase [EC:2.1.2.1]
Dairy_cattle_Jejunum-1__c552740_253	RGVC9933	K00600	1. Metabolism	1.2 Energy metabolism	Methane metabolism	ko00680	glyA, SHMT; glycine hydroxymethyltransferase [EC:2.1.2.1]
Dairy_cattle_Jejunum-1__c552740_253	RGVC9933	K00600	1. Metabolism	1.0 Global and overview maps	Metabolic pathways	ko01100	glyA, SHMT; glycine hydroxymethyltransferase [EC:2.1.2.1]
Dairy_cattle_Jejunum-1__c552740_253	RGVC9933	K00600	1. Metabolism	1.0 Global and overview maps	Biosynthesis of secondary metabolites	ko01110	glyA, SHMT; glycine hydroxymethyltransferase [EC:2.1.2.1]
Dairy_cattle_Jejunum-1__c552740_253	RGVC9933	K00600	1. Metabolism	1.0 Global and overview maps	Microbial metabolism in diverse environments	ko01120	glyA, SHMT; glycine hydroxymethyltransferase [EC:2.1.2.1]
Dairy_cattle_Jejunum-1__c552740_253	RGVC9933	K00600	1. Metabolism	1.0 Global and overview maps	Biosynthesis of antibiotics	ko01130	glyA, SHMT; glycine hydroxymethyltransferase [EC:2.1.2.1]
Dairy_cattle_Jejunum-1__c552740_253	RGVC9933	K00600	1. Metabolism	1.0 Global and overview maps	Carbon metabolism	ko01200	glyA, SHMT; glycine hydroxymethyltransferase [EC:2.1.2.1]
Dairy_cattle_Jejunum-1__c552740_253	RGVC9933	K00600	1. Metabolism	1.0 Global and overview maps	Biosynthesis of amino acids	ko01230	glyA, SHMT; glycine hydroxymethyltransferase [EC:2.1.2.1]
Dairy_cattle_Jejunum-1__c552740_253	RGVC9933	K00600	6. Human Diseases	6.12 Drug resistance: antineoplastic	Antifolate resistance	ko01523	glyA, SHMT; glycine hydroxymethyltransferase [EC:2.1.2.1]
Dairy_cattle_Jejunum-2__c1089_6	RGVC10066	K01520	1. Metabolism	1.4 Nucleotide metabolism	Pyrimidine metabolism	ko00240	dut, DUT; dUTP pyrophosphatase [EC:3.6.1.23]
Dairy_cattle_Jejunum-2__c1089_6	RGVC10066	K01520	1. Metabolism	1.11 Xenobiotics biodegradation and metabolism	Drug metabolism - other enzymes	ko00983	dut, DUT; dUTP pyrophosphatase [EC:3.6.1.23]
Dairy_cattle_Jejunum-2__c1089_6	RGVC10066	K01520	1. Metabolism	1.0 Global and overview maps	Metabolic pathways	ko01100	dut, DUT; dUTP pyrophosphatase [EC:3.6.1.23]
Dairy_cattle_Jejunum-2__c416642_37	RGVC10346	K01520	1. Metabolism	1.4 Nucleotide metabolism	Pyrimidine metabolism	ko00240	dut, DUT; dUTP pyrophosphatase [EC:3.6.1.23]
Dairy_cattle_Jejunum-2__c416642_37	RGVC10346	K01520	1. Metabolism	1.11 Xenobiotics biodegradation and metabolism	Drug metabolism - other enzymes	ko00983	dut, DUT; dUTP pyrophosphatase [EC:3.6.1.23]
Dairy_cattle_Jejunum-2__c416642_37	RGVC10346	K01520	1. Metabolism	1.0 Global and overview maps	Metabolic pathways	ko01100	dut, DUT; dUTP pyrophosphatase [EC:3.6.1.23]
Dairy_cattle_Rectum-1__c124994_30	RGVC10763	K01520	1. Metabolism	1.4 Nucleotide metabolism	Pyrimidine metabolism	ko00240	dut, DUT; dUTP pyrophosphatase [EC:3.6.1.23]
Dairy_cattle_Rectum-1__c124994_30	RGVC10763	K01520	1. Metabolism	1.11 Xenobiotics biodegradation and metabolism	Drug metabolism - other enzymes	ko00983	dut, DUT; dUTP pyrophosphatase [EC:3.6.1.23]
Dairy_cattle_Rectum-1__c124994_30	RGVC10763	K01520	1. Metabolism	1.0 Global and overview maps	Metabolic pathways	ko01100	dut, DUT; dUTP pyrophosphatase [EC:3.6.1.23]
Dairy_cattle_Rectum-1__c124994_34	RGVC10763	K21636	1. Metabolism	1.4 Nucleotide metabolism	Purine metabolism	ko00230	nrdD; ribonucleoside-triphosphate reductase (formate) [EC:1.1.98.6]
Dairy_cattle_Rectum-1__c124994_34	RGVC10763	K21636	1. Metabolism	1.4 Nucleotide metabolism	Pyrimidine metabolism	ko00240	nrdD; ribonucleoside-triphosphate reductase (formate) [EC:1.1.98.6]
Dairy_cattle_Rectum-1__c124994_34	RGVC10763	K21636	1. Metabolism	1.0 Global and overview maps	Metabolic pathways	ko01100	nrdD; ribonucleoside-triphosphate reductase (formate) [EC:1.1.98.6]
Dairy_cattle_Rectum-1__c292597_35	RGVC10771	K00558	1. Metabolism	1.5 Amino acid metabolism	Cysteine and methionine metabolism	ko00270	DNMT1, dcm; DNA (cytosine-5)-methyltransferase 1 [EC:2.1.1.37]
Dairy_cattle_Rectum-1__c292597_35	RGVC10771	K00558	1. Metabolism	1.0 Global and overview maps	Metabolic pathways	ko01100	DNMT1, dcm; DNA (cytosine-5)-methyltransferase 1 [EC:2.1.1.37]
Dairy_cattle_Rectum-1__c292597_35	RGVC10771	K00558	6. Human Diseases	6.1 Cancer: overview	MicroRNAs in cancer	ko05206	DNMT1, dcm; DNA (cytosine-5)-methyltransferase 1 [EC:2.1.1.37]
Dairy_cattle_Rumen-3__c664_68	RGVC11170	K01520	1. Metabolism	1.4 Nucleotide metabolism	Pyrimidine metabolism	ko00240	dut, DUT; dUTP pyrophosphatase [EC:3.6.1.23]
Dairy_cattle_Rumen-3__c664_68	RGVC11170	K01520	1. Metabolism	1.11 Xenobiotics biodegradation and metabolism	Drug metabolism - other enzymes	ko00983	dut, DUT; dUTP pyrophosphatase [EC:3.6.1.23]
Dairy_cattle_Rumen-3__c664_68	RGVC11170	K01520	1. Metabolism	1.0 Global and overview maps	Metabolic pathways	ko01100	dut, DUT; dUTP pyrophosphatase [EC:3.6.1.23]
flye-dairy_11394_22	RGVC11283	K04487	1. Metabolism	1.8 Metabolism of cofactors and vitamins	Thiamine metabolism	ko00730	iscS, NFS1; cysteine desulfurase [EC:2.8.1.7]
flye-dairy_11394_22	RGVC11283	K04487	1. Metabolism	1.0 Global and overview maps	Metabolic pathways	ko01100	iscS, NFS1; cysteine desulfurase [EC:2.8.1.7]
flye-dairy_11394_22	RGVC11283	K04487	2. Genetic Information Processing	2.3 Folding, sorting and degradation	Sulfur relay system	ko04122	iscS, NFS1; cysteine desulfurase [EC:2.8.1.7]
flye-dairy_11394_83	RGVC11283	K01520	1. Metabolism	1.4 Nucleotide metabolism	Pyrimidine metabolism	ko00240	dut, DUT; dUTP pyrophosphatase [EC:3.6.1.23]
flye-dairy_11394_83	RGVC11283	K01520	1. Metabolism	1.11 Xenobiotics biodegradation and metabolism	Drug metabolism - other enzymes	ko00983	dut, DUT; dUTP pyrophosphatase [EC:3.6.1.23]
flye-dairy_11394_83	RGVC11283	K01520	1. Metabolism	1.0 Global and overview maps	Metabolic pathways	ko01100	dut, DUT; dUTP pyrophosphatase [EC:3.6.1.23]
flye-dairy_11394_96	RGVC11283	K21636	1. Metabolism	1.4 Nucleotide metabolism	Purine metabolism	ko00230	nrdD; ribonucleoside-triphosphate reductase (formate) [EC:1.1.98.6]
flye-dairy_11394_96	RGVC11283	K21636	1. Metabolism	1.4 Nucleotide metabolism	Pyrimidine metabolism	ko00240	nrdD; ribonucleoside-triphosphate reductase (formate) [EC:1.1.98.6]
flye-dairy_11394_96	RGVC11283	K21636	1. Metabolism	1.0 Global and overview maps	Metabolic pathways	ko01100	nrdD; ribonucleoside-triphosphate reductase (formate) [EC:1.1.98.6]
flye-dairy_15182_245	RGVC11403	K00969	1. Metabolism	1.8 Metabolism of cofactors and vitamins	Nicotinate and nicotinamide metabolism	ko00760	nadD; nicotinate-nucleotide adenylyltransferase [EC:2.7.7.18]
flye-dairy_15182_245	RGVC11403	K00969	1. Metabolism	1.0 Global and overview maps	Metabolic pathways	ko01100	nadD; nicotinate-nucleotide adenylyltransferase [EC:2.7.7.18]
flye-dairy_15182_251	RGVC11403	K00763	1. Metabolism	1.8 Metabolism of cofactors and vitamins	Nicotinate and nicotinamide metabolism	ko00760	pncB, NAPRT1; nicotinate phosphoribosyltransferase [EC:6.3.4.21]
flye-dairy_15182_251	RGVC11403	K00763	1. Metabolism	1.0 Global and overview maps	Metabolic pathways	ko01100	pncB, NAPRT1; nicotinate phosphoribosyltransferase [EC:6.3.4.21]
flye-dairy_15182_286	RGVC11403	K01520	1. Metabolism	1.4 Nucleotide metabolism	Pyrimidine metabolism	ko00240	dut, DUT; dUTP pyrophosphatase [EC:3.6.1.23]
flye-dairy_15182_286	RGVC11403	K01520	1. Metabolism	1.11 Xenobiotics biodegradation and metabolism	Drug metabolism - other enzymes	ko00983	dut, DUT; dUTP pyrophosphatase [EC:3.6.1.23]
flye-dairy_15182_286	RGVC11403	K01520	1. Metabolism	1.0 Global and overview maps	Metabolic pathways	ko01100	dut, DUT; dUTP pyrophosphatase [EC:3.6.1.23]
flye-dairy_15182_294	RGVC11403	K21636	1. Metabolism	1.4 Nucleotide metabolism	Purine metabolism	ko00230	nrdD; ribonucleoside-triphosphate reductase (formate) [EC:1.1.98.6]
flye-dairy_15182_294	RGVC11403	K21636	1. Metabolism	1.4 Nucleotide metabolism	Pyrimidine metabolism	ko00240	nrdD; ribonucleoside-triphosphate reductase (formate) [EC:1.1.98.6]
flye-dairy_15182_294	RGVC11403	K21636	1. Metabolism	1.0 Global and overview maps	Metabolic pathways	ko01100	nrdD; ribonucleoside-triphosphate reductase (formate) [EC:1.1.98.6]
flye-dairy_17441_215	RGVC11466	K01520	1. Metabolism	1.4 Nucleotide metabolism	Pyrimidine metabolism	ko00240	dut, DUT; dUTP pyrophosphatase [EC:3.6.1.23]
flye-dairy_17441_215	RGVC11466	K01520	1. Metabolism	1.11 Xenobiotics biodegradation and metabolism	Drug metabolism - other enzymes	ko00983	dut, DUT; dUTP pyrophosphatase [EC:3.6.1.23]
flye-dairy_17441_215	RGVC11466	K01520	1. Metabolism	1.0 Global and overview maps	Metabolic pathways	ko01100	dut, DUT; dUTP pyrophosphatase [EC:3.6.1.23]
flye-dairy_17441_260	RGVC11466	K21636	1. Metabolism	1.4 Nucleotide metabolism	Purine metabolism	ko00230	nrdD; ribonucleoside-triphosphate reductase (formate) [EC:1.1.98.6]
flye-dairy_17441_260	RGVC11466	K21636	1. Metabolism	1.4 Nucleotide metabolism	Pyrimidine metabolism	ko00240	nrdD; ribonucleoside-triphosphate reductase (formate) [EC:1.1.98.6]
flye-dairy_17441_260	RGVC11466	K21636	1. Metabolism	1.0 Global and overview maps	Metabolic pathways	ko01100	nrdD; ribonucleoside-triphosphate reductase (formate) [EC:1.1.98.6]
flye-dairy_17441_418	RGVC11466	K03462	1. Metabolism	1.8 Metabolism of cofactors and vitamins	Nicotinate and nicotinamide metabolism	ko00760	NAMPT; nicotinamide phosphoribosyltransferase [EC:2.4.2.12]
flye-dairy_17441_418	RGVC11466	K03462	1. Metabolism	1.0 Global and overview maps	Metabolic pathways	ko01100	NAMPT; nicotinamide phosphoribosyltransferase [EC:2.4.2.12]
flye-dairy_17441_418	RGVC11466	K03462	5. Organismal Systems	5.1 Immune system	NOD-like receptor signaling pathway	ko04621	NAMPT; nicotinamide phosphoribosyltransferase [EC:2.4.2.12]
flye-dairy_17441_435	RGVC11466	K20276	4. Cellular Processes	4.4 Cellular community - prokaryotes	Quorum sensing	ko02024	bapA; large repetitive protein
flye-dairy_18845_11	RGVC11509	K00789	1. Metabolism	1.5 Amino acid metabolism	Cysteine and methionine metabolism	ko00270	metK; S-adenosylmethionine synthetase [EC:2.5.1.6]
flye-dairy_18845_11	RGVC11509	K00789	1. Metabolism	1.0 Global and overview maps	Metabolic pathways	ko01100	metK; S-adenosylmethionine synthetase [EC:2.5.1.6]
flye-dairy_18845_11	RGVC11509	K00789	1. Metabolism	1.0 Global and overview maps	Biosynthesis of secondary metabolites	ko01110	metK; S-adenosylmethionine synthetase [EC:2.5.1.6]
flye-dairy_18845_11	RGVC11509	K00789	1. Metabolism	1.0 Global and overview maps	Biosynthesis of amino acids	ko01230	metK; S-adenosylmethionine synthetase [EC:2.5.1.6]
flye-dairy_18903_23	RGVC11514	K01939	1. Metabolism	1.4 Nucleotide metabolism	Purine metabolism	ko00230	purA, ADSS; adenylosuccinate synthase [EC:6.3.4.4]
flye-dairy_18903_23	RGVC11514	K01939	1. Metabolism	1.5 Amino acid metabolism	Alanine, aspartate and glutamate metabolism	ko00250	purA, ADSS; adenylosuccinate synthase [EC:6.3.4.4]
flye-dairy_18903_23	RGVC11514	K01939	1. Metabolism	1.0 Global and overview maps	Metabolic pathways	ko01100	purA, ADSS; adenylosuccinate synthase [EC:6.3.4.4]
flye-dairy_18903_74	RGVC11514	K21636	1. Metabolism	1.4 Nucleotide metabolism	Purine metabolism	ko00230	nrdD; ribonucleoside-triphosphate reductase (formate) [EC:1.1.98.6]
flye-dairy_18903_74	RGVC11514	K21636	1. Metabolism	1.4 Nucleotide metabolism	Pyrimidine metabolism	ko00240	nrdD; ribonucleoside-triphosphate reductase (formate) [EC:1.1.98.6]
flye-dairy_18903_74	RGVC11514	K21636	1. Metabolism	1.0 Global and overview maps	Metabolic pathways	ko01100	nrdD; ribonucleoside-triphosphate reductase (formate) [EC:1.1.98.6]
flye-dairy_18903_81	RGVC11514	K01520	1. Metabolism	1.4 Nucleotide metabolism	Pyrimidine metabolism	ko00240	dut, DUT; dUTP pyrophosphatase [EC:3.6.1.23]
flye-dairy_18903_81	RGVC11514	K01520	1. Metabolism	1.11 Xenobiotics biodegradation and metabolism	Drug metabolism - other enzymes	ko00983	dut, DUT; dUTP pyrophosphatase [EC:3.6.1.23]
flye-dairy_18903_81	RGVC11514	K01520	1. Metabolism	1.0 Global and overview maps	Metabolic pathways	ko01100	dut, DUT; dUTP pyrophosphatase [EC:3.6.1.23]
flye-dairy_19148_144	RGVC11522	K01520	1. Metabolism	1.4 Nucleotide metabolism	Pyrimidine metabolism	ko00240	dut, DUT; dUTP pyrophosphatase [EC:3.6.1.23]
flye-dairy_19148_144	RGVC11522	K01520	1. Metabolism	1.11 Xenobiotics biodegradation and metabolism	Drug metabolism - other enzymes	ko00983	dut, DUT; dUTP pyrophosphatase [EC:3.6.1.23]
flye-dairy_19148_144	RGVC11522	K01520	1. Metabolism	1.0 Global and overview maps	Metabolic pathways	ko01100	dut, DUT; dUTP pyrophosphatase [EC:3.6.1.23]
flye-dairy_19148_205	RGVC11522	K01939	1. Metabolism	1.4 Nucleotide metabolism	Purine metabolism	ko00230	purA, ADSS; adenylosuccinate synthase [EC:6.3.4.4]
flye-dairy_19148_205	RGVC11522	K01939	1. Metabolism	1.5 Amino acid metabolism	Alanine, aspartate and glutamate metabolism	ko00250	purA, ADSS; adenylosuccinate synthase [EC:6.3.4.4]
flye-dairy_19148_205	RGVC11522	K01939	1. Metabolism	1.0 Global and overview maps	Metabolic pathways	ko01100	purA, ADSS; adenylosuccinate synthase [EC:6.3.4.4]
flye-dairy_20300_24	RGVC11560	K00558	1. Metabolism	1.5 Amino acid metabolism	Cysteine and methionine metabolism	ko00270	DNMT1, dcm; DNA (cytosine-5)-methyltransferase 1 [EC:2.1.1.37]
flye-dairy_20300_24	RGVC11560	K00558	1. Metabolism	1.0 Global and overview maps	Metabolic pathways	ko01100	DNMT1, dcm; DNA (cytosine-5)-methyltransferase 1 [EC:2.1.1.37]
flye-dairy_20300_24	RGVC11560	K00558	6. Human Diseases	6.1 Cancer: overview	MicroRNAs in cancer	ko05206	DNMT1, dcm; DNA (cytosine-5)-methyltransferase 1 [EC:2.1.1.37]
flye-dairy_20300_48	RGVC11560	K01520	1. Metabolism	1.4 Nucleotide metabolism	Pyrimidine metabolism	ko00240	dut, DUT; dUTP pyrophosphatase [EC:3.6.1.23]
flye-dairy_20300_48	RGVC11560	K01520	1. Metabolism	1.11 Xenobiotics biodegradation and metabolism	Drug metabolism - other enzymes	ko00983	dut, DUT; dUTP pyrophosphatase [EC:3.6.1.23]
flye-dairy_20300_48	RGVC11560	K01520	1. Metabolism	1.0 Global and overview maps	Metabolic pathways	ko01100	dut, DUT; dUTP pyrophosphatase [EC:3.6.1.23]
flye-dairy_22496_13	RGVC11633	K00789	1. Metabolism	1.5 Amino acid metabolism	Cysteine and methionine metabolism	ko00270	metK; S-adenosylmethionine synthetase [EC:2.5.1.6]
flye-dairy_22496_13	RGVC11633	K00789	1. Metabolism	1.0 Global and overview maps	Metabolic pathways	ko01100	metK; S-adenosylmethionine synthetase [EC:2.5.1.6]
flye-dairy_22496_13	RGVC11633	K00789	1. Metabolism	1.0 Global and overview maps	Biosynthesis of secondary metabolites	ko01110	metK; S-adenosylmethionine synthetase [EC:2.5.1.6]
flye-dairy_22496_13	RGVC11633	K00789	1. Metabolism	1.0 Global and overview maps	Biosynthesis of amino acids	ko01230	metK; S-adenosylmethionine synthetase [EC:2.5.1.6]
flye-dairy_22496_7	RGVC11633	K00789	1. Metabolism	1.5 Amino acid metabolism	Cysteine and methionine metabolism	ko00270	metK; S-adenosylmethionine synthetase [EC:2.5.1.6]
flye-dairy_22496_7	RGVC11633	K00789	1. Metabolism	1.0 Global and overview maps	Metabolic pathways	ko01100	metK; S-adenosylmethionine synthetase [EC:2.5.1.6]
flye-dairy_22496_7	RGVC11633	K00789	1. Metabolism	1.0 Global and overview maps	Biosynthesis of secondary metabolites	ko01110	metK; S-adenosylmethionine synthetase [EC:2.5.1.6]
flye-dairy_22496_7	RGVC11633	K00789	1. Metabolism	1.0 Global and overview maps	Biosynthesis of amino acids	ko01230	metK; S-adenosylmethionine synthetase [EC:2.5.1.6]
flye-dairy_24693_110	RGVC11704	K04487	1. Metabolism	1.8 Metabolism of cofactors and vitamins	Thiamine metabolism	ko00730	iscS, NFS1; cysteine desulfurase [EC:2.8.1.7]
flye-dairy_24693_110	RGVC11704	K04487	1. Metabolism	1.0 Global and overview maps	Metabolic pathways	ko01100	iscS, NFS1; cysteine desulfurase [EC:2.8.1.7]
flye-dairy_24693_110	RGVC11704	K04487	2. Genetic Information Processing	2.3 Folding, sorting and degradation	Sulfur relay system	ko04122	iscS, NFS1; cysteine desulfurase [EC:2.8.1.7]
flye-dairy_24693_149	RGVC11704	K00600	1. Metabolism	1.5 Amino acid metabolism	Glycine, serine and threonine metabolism	ko00260	glyA, SHMT; glycine hydroxymethyltransferase [EC:2.1.2.1]
flye-dairy_24693_149	RGVC11704	K00600	1. Metabolism	1.6 Metabolism of other amino acids	Cyanoamino acid metabolism	ko00460	glyA, SHMT; glycine hydroxymethyltransferase [EC:2.1.2.1]
flye-dairy_24693_149	RGVC11704	K00600	1. Metabolism	1.1 Carbohydrate metabolism	Glyoxylate and dicarboxylate metabolism	ko00630	glyA, SHMT; glycine hydroxymethyltransferase [EC:2.1.2.1]
flye-dairy_24693_149	RGVC11704	K00600	1. Metabolism	1.8 Metabolism of cofactors and vitamins	One carbon pool by folate	ko00670	glyA, SHMT; glycine hydroxymethyltransferase [EC:2.1.2.1]
flye-dairy_24693_149	RGVC11704	K00600	1. Metabolism	1.2 Energy metabolism	Methane metabolism	ko00680	glyA, SHMT; glycine hydroxymethyltransferase [EC:2.1.2.1]
flye-dairy_24693_149	RGVC11704	K00600	1. Metabolism	1.0 Global and overview maps	Metabolic pathways	ko01100	glyA, SHMT; glycine hydroxymethyltransferase [EC:2.1.2.1]
flye-dairy_24693_149	RGVC11704	K00600	1. Metabolism	1.0 Global and overview maps	Biosynthesis of secondary metabolites	ko01110	glyA, SHMT; glycine hydroxymethyltransferase [EC:2.1.2.1]
flye-dairy_24693_149	RGVC11704	K00600	1. Metabolism	1.0 Global and overview maps	Microbial metabolism in diverse environments	ko01120	glyA, SHMT; glycine hydroxymethyltransferase [EC:2.1.2.1]
flye-dairy_24693_149	RGVC11704	K00600	1. Metabolism	1.0 Global and overview maps	Biosynthesis of antibiotics	ko01130	glyA, SHMT; glycine hydroxymethyltransferase [EC:2.1.2.1]
flye-dairy_24693_149	RGVC11704	K00600	1. Metabolism	1.0 Global and overview maps	Carbon metabolism	ko01200	glyA, SHMT; glycine hydroxymethyltransferase [EC:2.1.2.1]
flye-dairy_24693_149	RGVC11704	K00600	1. Metabolism	1.0 Global and overview maps	Biosynthesis of amino acids	ko01230	glyA, SHMT; glycine hydroxymethyltransferase [EC:2.1.2.1]
flye-dairy_24693_149	RGVC11704	K00600	6. Human Diseases	6.12 Drug resistance: antineoplastic	Antifolate resistance	ko01523	glyA, SHMT; glycine hydroxymethyltransferase [EC:2.1.2.1]
flye-dairy_24693_86	RGVC11704	K01520	1. Metabolism	1.4 Nucleotide metabolism	Pyrimidine metabolism	ko00240	dut, DUT; dUTP pyrophosphatase [EC:3.6.1.23]
flye-dairy_24693_86	RGVC11704	K01520	1. Metabolism	1.11 Xenobiotics biodegradation and metabolism	Drug metabolism - other enzymes	ko00983	dut, DUT; dUTP pyrophosphatase [EC:3.6.1.23]
flye-dairy_24693_86	RGVC11704	K01520	1. Metabolism	1.0 Global and overview maps	Metabolic pathways	ko01100	dut, DUT; dUTP pyrophosphatase [EC:3.6.1.23]
flye-dairy_24693_88	RGVC11704	K21636	1. Metabolism	1.4 Nucleotide metabolism	Purine metabolism	ko00230	nrdD; ribonucleoside-triphosphate reductase (formate) [EC:1.1.98.6]
flye-dairy_24693_88	RGVC11704	K21636	1. Metabolism	1.4 Nucleotide metabolism	Pyrimidine metabolism	ko00240	nrdD; ribonucleoside-triphosphate reductase (formate) [EC:1.1.98.6]
flye-dairy_24693_88	RGVC11704	K21636	1. Metabolism	1.0 Global and overview maps	Metabolic pathways	ko01100	nrdD; ribonucleoside-triphosphate reductase (formate) [EC:1.1.98.6]
flye-dairy_25779_72	RGVC11760	K00558	1. Metabolism	1.5 Amino acid metabolism	Cysteine and methionine metabolism	ko00270	DNMT1, dcm; DNA (cytosine-5)-methyltransferase 1 [EC:2.1.1.37]
flye-dairy_25779_72	RGVC11760	K00558	1. Metabolism	1.0 Global and overview maps	Metabolic pathways	ko01100	DNMT1, dcm; DNA (cytosine-5)-methyltransferase 1 [EC:2.1.1.37]
flye-dairy_25779_72	RGVC11760	K00558	6. Human Diseases	6.1 Cancer: overview	MicroRNAs in cancer	ko05206	DNMT1, dcm; DNA (cytosine-5)-methyltransferase 1 [EC:2.1.1.37]
flye-dairy_25927_102	RGVC11773	K01520	1. Metabolism	1.4 Nucleotide metabolism	Pyrimidine metabolism	ko00240	dut, DUT; dUTP pyrophosphatase [EC:3.6.1.23]
flye-dairy_25927_102	RGVC11773	K01520	1. Metabolism	1.11 Xenobiotics biodegradation and metabolism	Drug metabolism - other enzymes	ko00983	dut, DUT; dUTP pyrophosphatase [EC:3.6.1.23]
flye-dairy_25927_102	RGVC11773	K01520	1. Metabolism	1.0 Global and overview maps	Metabolic pathways	ko01100	dut, DUT; dUTP pyrophosphatase [EC:3.6.1.23]
flye-dairy_25927_60	RGVC11773	K04487	1. Metabolism	1.8 Metabolism of cofactors and vitamins	Thiamine metabolism	ko00730	iscS, NFS1; cysteine desulfurase [EC:2.8.1.7]
flye-dairy_25927_60	RGVC11773	K04487	1. Metabolism	1.0 Global and overview maps	Metabolic pathways	ko01100	iscS, NFS1; cysteine desulfurase [EC:2.8.1.7]
flye-dairy_25927_60	RGVC11773	K04487	2. Genetic Information Processing	2.3 Folding, sorting and degradation	Sulfur relay system	ko04122	iscS, NFS1; cysteine desulfurase [EC:2.8.1.7]
flye-dairy_25927_99	RGVC11773	K21636	1. Metabolism	1.4 Nucleotide metabolism	Purine metabolism	ko00230	nrdD; ribonucleoside-triphosphate reductase (formate) [EC:1.1.98.6]
flye-dairy_25927_99	RGVC11773	K21636	1. Metabolism	1.4 Nucleotide metabolism	Pyrimidine metabolism	ko00240	nrdD; ribonucleoside-triphosphate reductase (formate) [EC:1.1.98.6]
flye-dairy_25927_99	RGVC11773	K21636	1. Metabolism	1.0 Global and overview maps	Metabolic pathways	ko01100	nrdD; ribonucleoside-triphosphate reductase (formate) [EC:1.1.98.6]
flye-dairy_25935_38	RGVC11775	K00558	1. Metabolism	1.5 Amino acid metabolism	Cysteine and methionine metabolism	ko00270	DNMT1, dcm; DNA (cytosine-5)-methyltransferase 1 [EC:2.1.1.37]
flye-dairy_25935_38	RGVC11775	K00558	1. Metabolism	1.0 Global and overview maps	Metabolic pathways	ko01100	DNMT1, dcm; DNA (cytosine-5)-methyltransferase 1 [EC:2.1.1.37]
flye-dairy_25935_38	RGVC11775	K00558	6. Human Diseases	6.1 Cancer: overview	MicroRNAs in cancer	ko05206	DNMT1, dcm; DNA (cytosine-5)-methyltransferase 1 [EC:2.1.1.37]
flye-dairy_27186_70	RGVC11828	K00789	1. Metabolism	1.5 Amino acid metabolism	Cysteine and methionine metabolism	ko00270	metK; S-adenosylmethionine synthetase [EC:2.5.1.6]
flye-dairy_27186_70	RGVC11828	K00789	1. Metabolism	1.0 Global and overview maps	Metabolic pathways	ko01100	metK; S-adenosylmethionine synthetase [EC:2.5.1.6]
flye-dairy_27186_70	RGVC11828	K00789	1. Metabolism	1.0 Global and overview maps	Biosynthesis of secondary metabolites	ko01110	metK; S-adenosylmethionine synthetase [EC:2.5.1.6]
flye-dairy_27186_70	RGVC11828	K00789	1. Metabolism	1.0 Global and overview maps	Biosynthesis of amino acids	ko01230	metK; S-adenosylmethionine synthetase [EC:2.5.1.6]
flye-dairy_27649_140	RGVC11845	K21636	1. Metabolism	1.4 Nucleotide metabolism	Purine metabolism	ko00230	nrdD; ribonucleoside-triphosphate reductase (formate) [EC:1.1.98.6]
flye-dairy_27649_140	RGVC11845	K21636	1. Metabolism	1.4 Nucleotide metabolism	Pyrimidine metabolism	ko00240	nrdD; ribonucleoside-triphosphate reductase (formate) [EC:1.1.98.6]
flye-dairy_27649_140	RGVC11845	K21636	1. Metabolism	1.0 Global and overview maps	Metabolic pathways	ko01100	nrdD; ribonucleoside-triphosphate reductase (formate) [EC:1.1.98.6]
flye-dairy_27649_169	RGVC11845	K01520	1. Metabolism	1.4 Nucleotide metabolism	Pyrimidine metabolism	ko00240	dut, DUT; dUTP pyrophosphatase [EC:3.6.1.23]
flye-dairy_27649_169	RGVC11845	K01520	1. Metabolism	1.11 Xenobiotics biodegradation and metabolism	Drug metabolism - other enzymes	ko00983	dut, DUT; dUTP pyrophosphatase [EC:3.6.1.23]
flye-dairy_27649_169	RGVC11845	K01520	1. Metabolism	1.0 Global and overview maps	Metabolic pathways	ko01100	dut, DUT; dUTP pyrophosphatase [EC:3.6.1.23]
flye-dairy_29754_46	RGVC11917	K01520	1. Metabolism	1.4 Nucleotide metabolism	Pyrimidine metabolism	ko00240	dut, DUT; dUTP pyrophosphatase [EC:3.6.1.23]
flye-dairy_29754_46	RGVC11917	K01520	1. Metabolism	1.11 Xenobiotics biodegradation and metabolism	Drug metabolism - other enzymes	ko00983	dut, DUT; dUTP pyrophosphatase [EC:3.6.1.23]
flye-dairy_29754_46	RGVC11917	K01520	1. Metabolism	1.0 Global and overview maps	Metabolic pathways	ko01100	dut, DUT; dUTP pyrophosphatase [EC:3.6.1.23]
flye-dairy_30171_73	RGVC11939	K00789	1. Metabolism	1.5 Amino acid metabolism	Cysteine and methionine metabolism	ko00270	metK; S-adenosylmethionine synthetase [EC:2.5.1.6]
flye-dairy_30171_73	RGVC11939	K00789	1. Metabolism	1.0 Global and overview maps	Metabolic pathways	ko01100	metK; S-adenosylmethionine synthetase [EC:2.5.1.6]
flye-dairy_30171_73	RGVC11939	K00789	1. Metabolism	1.0 Global and overview maps	Biosynthesis of secondary metabolites	ko01110	metK; S-adenosylmethionine synthetase [EC:2.5.1.6]
flye-dairy_30171_73	RGVC11939	K00789	1. Metabolism	1.0 Global and overview maps	Biosynthesis of amino acids	ko01230	metK; S-adenosylmethionine synthetase [EC:2.5.1.6]
flye-dairy_33378_299	RGVC12081	K01709	1. Metabolism	1.1 Carbohydrate metabolism	Amino sugar and nucleotide sugar metabolism	ko00520	rfbG; CDP-glucose 4,6-dehydratase [EC:4.2.1.45]
flye-dairy_33378_299	RGVC12081	K01709	1. Metabolism	1.0 Global and overview maps	Metabolic pathways	ko01100	rfbG; CDP-glucose 4,6-dehydratase [EC:4.2.1.45]
flye-dairy_33378_77	RGVC12081	K21636	1. Metabolism	1.4 Nucleotide metabolism	Purine metabolism	ko00230	nrdD; ribonucleoside-triphosphate reductase (formate) [EC:1.1.98.6]
flye-dairy_33378_77	RGVC12081	K21636	1. Metabolism	1.4 Nucleotide metabolism	Pyrimidine metabolism	ko00240	nrdD; ribonucleoside-triphosphate reductase (formate) [EC:1.1.98.6]
flye-dairy_33378_77	RGVC12081	K21636	1. Metabolism	1.0 Global and overview maps	Metabolic pathways	ko01100	nrdD; ribonucleoside-triphosphate reductase (formate) [EC:1.1.98.6]
flye-dairy_36182_1_64	RGVC12198	K00789	1. Metabolism	1.5 Amino acid metabolism	Cysteine and methionine metabolism	ko00270	metK; S-adenosylmethionine synthetase [EC:2.5.1.6]
flye-dairy_36182_1_64	RGVC12198	K00789	1. Metabolism	1.0 Global and overview maps	Metabolic pathways	ko01100	metK; S-adenosylmethionine synthetase [EC:2.5.1.6]
flye-dairy_36182_1_64	RGVC12198	K00789	1. Metabolism	1.0 Global and overview maps	Biosynthesis of secondary metabolites	ko01110	metK; S-adenosylmethionine synthetase [EC:2.5.1.6]
flye-dairy_36182_1_64	RGVC12198	K00789	1. Metabolism	1.0 Global and overview maps	Biosynthesis of amino acids	ko01230	metK; S-adenosylmethionine synthetase [EC:2.5.1.6]
flye-dairy_36182_1_65	RGVC12198	K00789	1. Metabolism	1.5 Amino acid metabolism	Cysteine and methionine metabolism	ko00270	metK; S-adenosylmethionine synthetase [EC:2.5.1.6]
flye-dairy_36182_1_65	RGVC12198	K00789	1. Metabolism	1.0 Global and overview maps	Metabolic pathways	ko01100	metK; S-adenosylmethionine synthetase [EC:2.5.1.6]
flye-dairy_36182_1_65	RGVC12198	K00789	1. Metabolism	1.0 Global and overview maps	Biosynthesis of secondary metabolites	ko01110	metK; S-adenosylmethionine synthetase [EC:2.5.1.6]
flye-dairy_36182_1_65	RGVC12198	K00789	1. Metabolism	1.0 Global and overview maps	Biosynthesis of amino acids	ko01230	metK; S-adenosylmethionine synthetase [EC:2.5.1.6]
flye-dairy_36321_339	RGVC12203	K01520	1. Metabolism	1.4 Nucleotide metabolism	Pyrimidine metabolism	ko00240	dut, DUT; dUTP pyrophosphatase [EC:3.6.1.23]
flye-dairy_36321_339	RGVC12203	K01520	1. Metabolism	1.11 Xenobiotics biodegradation and metabolism	Drug metabolism - other enzymes	ko00983	dut, DUT; dUTP pyrophosphatase [EC:3.6.1.23]
flye-dairy_36321_339	RGVC12203	K01520	1. Metabolism	1.0 Global and overview maps	Metabolic pathways	ko01100	dut, DUT; dUTP pyrophosphatase [EC:3.6.1.23]
flye-dairy_36321_439	RGVC12203	K00763	1. Metabolism	1.8 Metabolism of cofactors and vitamins	Nicotinate and nicotinamide metabolism	ko00760	pncB, NAPRT1; nicotinate phosphoribosyltransferase [EC:6.3.4.21]
flye-dairy_36321_439	RGVC12203	K00763	1. Metabolism	1.0 Global and overview maps	Metabolic pathways	ko01100	pncB, NAPRT1; nicotinate phosphoribosyltransferase [EC:6.3.4.21]
flye-dairy_36437_5	RGVC12210	K00558	1. Metabolism	1.5 Amino acid metabolism	Cysteine and methionine metabolism	ko00270	DNMT1, dcm; DNA (cytosine-5)-methyltransferase 1 [EC:2.1.1.37]
flye-dairy_36437_5	RGVC12210	K00558	1. Metabolism	1.0 Global and overview maps	Metabolic pathways	ko01100	DNMT1, dcm; DNA (cytosine-5)-methyltransferase 1 [EC:2.1.1.37]
flye-dairy_36437_5	RGVC12210	K00558	6. Human Diseases	6.1 Cancer: overview	MicroRNAs in cancer	ko05206	DNMT1, dcm; DNA (cytosine-5)-methyltransferase 1 [EC:2.1.1.37]
flye-dairy_36437_6	RGVC12210	K00558	1. Metabolism	1.5 Amino acid metabolism	Cysteine and methionine metabolism	ko00270	DNMT1, dcm; DNA (cytosine-5)-methyltransferase 1 [EC:2.1.1.37]
flye-dairy_36437_6	RGVC12210	K00558	1. Metabolism	1.0 Global and overview maps	Metabolic pathways	ko01100	DNMT1, dcm; DNA (cytosine-5)-methyltransferase 1 [EC:2.1.1.37]
flye-dairy_36437_6	RGVC12210	K00558	6. Human Diseases	6.1 Cancer: overview	MicroRNAs in cancer	ko05206	DNMT1, dcm; DNA (cytosine-5)-methyltransferase 1 [EC:2.1.1.37]
flye-dairy_36864_413	RGVC12225	K01520	1. Metabolism	1.4 Nucleotide metabolism	Pyrimidine metabolism	ko00240	dut, DUT; dUTP pyrophosphatase [EC:3.6.1.23]
flye-dairy_36864_413	RGVC12225	K01520	1. Metabolism	1.11 Xenobiotics biodegradation and metabolism	Drug metabolism - other enzymes	ko00983	dut, DUT; dUTP pyrophosphatase [EC:3.6.1.23]
flye-dairy_36864_413	RGVC12225	K01520	1. Metabolism	1.0 Global and overview maps	Metabolic pathways	ko01100	dut, DUT; dUTP pyrophosphatase [EC:3.6.1.23]
flye-dairy_38621_31	RGVC12314	K00789	1. Metabolism	1.5 Amino acid metabolism	Cysteine and methionine metabolism	ko00270	metK; S-adenosylmethionine synthetase [EC:2.5.1.6]
flye-dairy_38621_31	RGVC12314	K00789	1. Metabolism	1.0 Global and overview maps	Metabolic pathways	ko01100	metK; S-adenosylmethionine synthetase [EC:2.5.1.6]
flye-dairy_38621_31	RGVC12314	K00789	1. Metabolism	1.0 Global and overview maps	Biosynthesis of secondary metabolites	ko01110	metK; S-adenosylmethionine synthetase [EC:2.5.1.6]
flye-dairy_38621_31	RGVC12314	K00789	1. Metabolism	1.0 Global and overview maps	Biosynthesis of amino acids	ko01230	metK; S-adenosylmethionine synthetase [EC:2.5.1.6]
flye-dairy_41243_47	RGVC12436	K01520	1. Metabolism	1.4 Nucleotide metabolism	Pyrimidine metabolism	ko00240	dut, DUT; dUTP pyrophosphatase [EC:3.6.1.23]
flye-dairy_41243_47	RGVC12436	K01520	1. Metabolism	1.11 Xenobiotics biodegradation and metabolism	Drug metabolism - other enzymes	ko00983	dut, DUT; dUTP pyrophosphatase [EC:3.6.1.23]
flye-dairy_41243_47	RGVC12436	K01520	1. Metabolism	1.0 Global and overview maps	Metabolic pathways	ko01100	dut, DUT; dUTP pyrophosphatase [EC:3.6.1.23]
flye-dairy_41243_55	RGVC12436	K21636	1. Metabolism	1.4 Nucleotide metabolism	Purine metabolism	ko00230	nrdD; ribonucleoside-triphosphate reductase (formate) [EC:1.1.98.6]
flye-dairy_41243_55	RGVC12436	K21636	1. Metabolism	1.4 Nucleotide metabolism	Pyrimidine metabolism	ko00240	nrdD; ribonucleoside-triphosphate reductase (formate) [EC:1.1.98.6]
flye-dairy_41243_55	RGVC12436	K21636	1. Metabolism	1.0 Global and overview maps	Metabolic pathways	ko01100	nrdD; ribonucleoside-triphosphate reductase (formate) [EC:1.1.98.6]
flye-dairy_41784_1_16	RGVC12476	K01507	1. Metabolism	1.2 Energy metabolism	Oxidative phosphorylation	ko00190	ppa; inorganic pyrophosphatase [EC:3.6.1.1]
flye-dairy_44160_20	RGVC12599	K00789	1. Metabolism	1.5 Amino acid metabolism	Cysteine and methionine metabolism	ko00270	metK; S-adenosylmethionine synthetase [EC:2.5.1.6]
flye-dairy_44160_20	RGVC12599	K00789	1. Metabolism	1.0 Global and overview maps	Metabolic pathways	ko01100	metK; S-adenosylmethionine synthetase [EC:2.5.1.6]
flye-dairy_44160_20	RGVC12599	K00789	1. Metabolism	1.0 Global and overview maps	Biosynthesis of secondary metabolites	ko01110	metK; S-adenosylmethionine synthetase [EC:2.5.1.6]
flye-dairy_44160_20	RGVC12599	K00789	1. Metabolism	1.0 Global and overview maps	Biosynthesis of amino acids	ko01230	metK; S-adenosylmethionine synthetase [EC:2.5.1.6]
flye-dairy_44482_22	RGVC12615	K01520	1. Metabolism	1.4 Nucleotide metabolism	Pyrimidine metabolism	ko00240	dut, DUT; dUTP pyrophosphatase [EC:3.6.1.23]
flye-dairy_44482_22	RGVC12615	K01520	1. Metabolism	1.11 Xenobiotics biodegradation and metabolism	Drug metabolism - other enzymes	ko00983	dut, DUT; dUTP pyrophosphatase [EC:3.6.1.23]
flye-dairy_44482_22	RGVC12615	K01520	1. Metabolism	1.0 Global and overview maps	Metabolic pathways	ko01100	dut, DUT; dUTP pyrophosphatase [EC:3.6.1.23]
flye-dairy_44482_41	RGVC12615	K00558	1. Metabolism	1.5 Amino acid metabolism	Cysteine and methionine metabolism	ko00270	DNMT1, dcm; DNA (cytosine-5)-methyltransferase 1 [EC:2.1.1.37]
flye-dairy_44482_41	RGVC12615	K00558	1. Metabolism	1.0 Global and overview maps	Metabolic pathways	ko01100	DNMT1, dcm; DNA (cytosine-5)-methyltransferase 1 [EC:2.1.1.37]
flye-dairy_44482_41	RGVC12615	K00558	6. Human Diseases	6.1 Cancer: overview	MicroRNAs in cancer	ko05206	DNMT1, dcm; DNA (cytosine-5)-methyltransferase 1 [EC:2.1.1.37]
flye-dairy_4513_132	RGVC12663	K21636	1. Metabolism	1.4 Nucleotide metabolism	Purine metabolism	ko00230	nrdD; ribonucleoside-triphosphate reductase (formate) [EC:1.1.98.6]
flye-dairy_4513_132	RGVC12663	K21636	1. Metabolism	1.4 Nucleotide metabolism	Pyrimidine metabolism	ko00240	nrdD; ribonucleoside-triphosphate reductase (formate) [EC:1.1.98.6]
flye-dairy_4513_132	RGVC12663	K21636	1. Metabolism	1.0 Global and overview maps	Metabolic pathways	ko01100	nrdD; ribonucleoside-triphosphate reductase (formate) [EC:1.1.98.6]
flye-dairy_4513_164	RGVC12663	K01520	1. Metabolism	1.4 Nucleotide metabolism	Pyrimidine metabolism	ko00240	dut, DUT; dUTP pyrophosphatase [EC:3.6.1.23]
flye-dairy_4513_164	RGVC12663	K01520	1. Metabolism	1.11 Xenobiotics biodegradation and metabolism	Drug metabolism - other enzymes	ko00983	dut, DUT; dUTP pyrophosphatase [EC:3.6.1.23]
flye-dairy_4513_164	RGVC12663	K01520	1. Metabolism	1.0 Global and overview maps	Metabolic pathways	ko01100	dut, DUT; dUTP pyrophosphatase [EC:3.6.1.23]
flye-dairy_45499_133	RGVC12693	K00763	1. Metabolism	1.8 Metabolism of cofactors and vitamins	Nicotinate and nicotinamide metabolism	ko00760	pncB, NAPRT1; nicotinate phosphoribosyltransferase [EC:6.3.4.21]
flye-dairy_45499_133	RGVC12693	K00763	1. Metabolism	1.0 Global and overview maps	Metabolic pathways	ko01100	pncB, NAPRT1; nicotinate phosphoribosyltransferase [EC:6.3.4.21]
flye-dairy_45697_8	RGVC12713	K00789	1. Metabolism	1.5 Amino acid metabolism	Cysteine and methionine metabolism	ko00270	metK; S-adenosylmethionine synthetase [EC:2.5.1.6]
flye-dairy_45697_8	RGVC12713	K00789	1. Metabolism	1.0 Global and overview maps	Metabolic pathways	ko01100	metK; S-adenosylmethionine synthetase [EC:2.5.1.6]
flye-dairy_45697_8	RGVC12713	K00789	1. Metabolism	1.0 Global and overview maps	Biosynthesis of secondary metabolites	ko01110	metK; S-adenosylmethionine synthetase [EC:2.5.1.6]
flye-dairy_45697_8	RGVC12713	K00789	1. Metabolism	1.0 Global and overview maps	Biosynthesis of amino acids	ko01230	metK; S-adenosylmethionine synthetase [EC:2.5.1.6]
flye-dairy_46825_39	RGVC12773	K01520	1. Metabolism	1.4 Nucleotide metabolism	Pyrimidine metabolism	ko00240	dut, DUT; dUTP pyrophosphatase [EC:3.6.1.23]
flye-dairy_46825_39	RGVC12773	K01520	1. Metabolism	1.11 Xenobiotics biodegradation and metabolism	Drug metabolism - other enzymes	ko00983	dut, DUT; dUTP pyrophosphatase [EC:3.6.1.23]
flye-dairy_46825_39	RGVC12773	K01520	1. Metabolism	1.0 Global and overview maps	Metabolic pathways	ko01100	dut, DUT; dUTP pyrophosphatase [EC:3.6.1.23]
flye-dairy_48418_22	RGVC12861	K17103	1. Metabolism	1.5 Amino acid metabolism	Glycine, serine and threonine metabolism	ko00260	CHO1, pssA; CDP-diacylglycerol---serine O-phosphatidyltransferase [EC:2.7.8.8]
flye-dairy_48418_22	RGVC12861	K17103	1. Metabolism	1.3 Lipid metabolism	Glycerophospholipid metabolism	ko00564	CHO1, pssA; CDP-diacylglycerol---serine O-phosphatidyltransferase [EC:2.7.8.8]
flye-dairy_48418_22	RGVC12861	K17103	1. Metabolism	1.0 Global and overview maps	Metabolic pathways	ko01100	CHO1, pssA; CDP-diacylglycerol---serine O-phosphatidyltransferase [EC:2.7.8.8]
flye-dairy_48418_22	RGVC12861	K17103	1. Metabolism	1.0 Global and overview maps	Biosynthesis of secondary metabolites	ko01110	CHO1, pssA; CDP-diacylglycerol---serine O-phosphatidyltransferase [EC:2.7.8.8]
flye-dairy_48897_32	RGVC12889	K00789	1. Metabolism	1.5 Amino acid metabolism	Cysteine and methionine metabolism	ko00270	metK; S-adenosylmethionine synthetase [EC:2.5.1.6]
flye-dairy_48897_32	RGVC12889	K00789	1. Metabolism	1.0 Global and overview maps	Metabolic pathways	ko01100	metK; S-adenosylmethionine synthetase [EC:2.5.1.6]
flye-dairy_48897_32	RGVC12889	K00789	1. Metabolism	1.0 Global and overview maps	Biosynthesis of secondary metabolites	ko01110	metK; S-adenosylmethionine synthetase [EC:2.5.1.6]
flye-dairy_48897_32	RGVC12889	K00789	1. Metabolism	1.0 Global and overview maps	Biosynthesis of amino acids	ko01230	metK; S-adenosylmethionine synthetase [EC:2.5.1.6]
flye-dairy_49720_16	RGVC12935	K00789	1. Metabolism	1.5 Amino acid metabolism	Cysteine and methionine metabolism	ko00270	metK; S-adenosylmethionine synthetase [EC:2.5.1.6]
flye-dairy_49720_16	RGVC12935	K00789	1. Metabolism	1.0 Global and overview maps	Metabolic pathways	ko01100	metK; S-adenosylmethionine synthetase [EC:2.5.1.6]
flye-dairy_49720_16	RGVC12935	K00789	1. Metabolism	1.0 Global and overview maps	Biosynthesis of secondary metabolites	ko01110	metK; S-adenosylmethionine synthetase [EC:2.5.1.6]
flye-dairy_49720_16	RGVC12935	K00789	1. Metabolism	1.0 Global and overview maps	Biosynthesis of amino acids	ko01230	metK; S-adenosylmethionine synthetase [EC:2.5.1.6]
flye-dairy_49996_268	RGVC12957	K00763	1. Metabolism	1.8 Metabolism of cofactors and vitamins	Nicotinate and nicotinamide metabolism	ko00760	pncB, NAPRT1; nicotinate phosphoribosyltransferase [EC:6.3.4.21]
flye-dairy_49996_268	RGVC12957	K00763	1. Metabolism	1.0 Global and overview maps	Metabolic pathways	ko01100	pncB, NAPRT1; nicotinate phosphoribosyltransferase [EC:6.3.4.21]
flye-dairy_49996_51	RGVC12957	K21636	1. Metabolism	1.4 Nucleotide metabolism	Purine metabolism	ko00230	nrdD; ribonucleoside-triphosphate reductase (formate) [EC:1.1.98.6]
flye-dairy_49996_51	RGVC12957	K21636	1. Metabolism	1.4 Nucleotide metabolism	Pyrimidine metabolism	ko00240	nrdD; ribonucleoside-triphosphate reductase (formate) [EC:1.1.98.6]
flye-dairy_49996_51	RGVC12957	K21636	1. Metabolism	1.0 Global and overview maps	Metabolic pathways	ko01100	nrdD; ribonucleoside-triphosphate reductase (formate) [EC:1.1.98.6]
flye-dairy_49996_63	RGVC12957	K01520	1. Metabolism	1.4 Nucleotide metabolism	Pyrimidine metabolism	ko00240	dut, DUT; dUTP pyrophosphatase [EC:3.6.1.23]
flye-dairy_49996_63	RGVC12957	K01520	1. Metabolism	1.11 Xenobiotics biodegradation and metabolism	Drug metabolism - other enzymes	ko00983	dut, DUT; dUTP pyrophosphatase [EC:3.6.1.23]
flye-dairy_49996_63	RGVC12957	K01520	1. Metabolism	1.0 Global and overview maps	Metabolic pathways	ko01100	dut, DUT; dUTP pyrophosphatase [EC:3.6.1.23]
flye-dairy_50036_70	RGVC12962	K00558	1. Metabolism	1.5 Amino acid metabolism	Cysteine and methionine metabolism	ko00270	DNMT1, dcm; DNA (cytosine-5)-methyltransferase 1 [EC:2.1.1.37]
flye-dairy_50036_70	RGVC12962	K00558	1. Metabolism	1.0 Global and overview maps	Metabolic pathways	ko01100	DNMT1, dcm; DNA (cytosine-5)-methyltransferase 1 [EC:2.1.1.37]
flye-dairy_50036_70	RGVC12962	K00558	6. Human Diseases	6.1 Cancer: overview	MicroRNAs in cancer	ko05206	DNMT1, dcm; DNA (cytosine-5)-methyltransferase 1 [EC:2.1.1.37]
flye-dairy_50209_84	RGVC12971	K01520	1. Metabolism	1.4 Nucleotide metabolism	Pyrimidine metabolism	ko00240	dut, DUT; dUTP pyrophosphatase [EC:3.6.1.23]
flye-dairy_50209_84	RGVC12971	K01520	1. Metabolism	1.11 Xenobiotics biodegradation and metabolism	Drug metabolism - other enzymes	ko00983	dut, DUT; dUTP pyrophosphatase [EC:3.6.1.23]
flye-dairy_50209_84	RGVC12971	K01520	1. Metabolism	1.0 Global and overview maps	Metabolic pathways	ko01100	dut, DUT; dUTP pyrophosphatase [EC:3.6.1.23]
flye-dairy_51354_206	RGVC13048	K01520	1. Metabolism	1.4 Nucleotide metabolism	Pyrimidine metabolism	ko00240	dut, DUT; dUTP pyrophosphatase [EC:3.6.1.23]
flye-dairy_51354_206	RGVC13048	K01520	1. Metabolism	1.11 Xenobiotics biodegradation and metabolism	Drug metabolism - other enzymes	ko00983	dut, DUT; dUTP pyrophosphatase [EC:3.6.1.23]
flye-dairy_51354_206	RGVC13048	K01520	1. Metabolism	1.0 Global and overview maps	Metabolic pathways	ko01100	dut, DUT; dUTP pyrophosphatase [EC:3.6.1.23]
flye-dairy_51354_212	RGVC13048	K21636	1. Metabolism	1.4 Nucleotide metabolism	Purine metabolism	ko00230	nrdD; ribonucleoside-triphosphate reductase (formate) [EC:1.1.98.6]
flye-dairy_51354_212	RGVC13048	K21636	1. Metabolism	1.4 Nucleotide metabolism	Pyrimidine metabolism	ko00240	nrdD; ribonucleoside-triphosphate reductase (formate) [EC:1.1.98.6]
flye-dairy_51354_212	RGVC13048	K21636	1. Metabolism	1.0 Global and overview maps	Metabolic pathways	ko01100	nrdD; ribonucleoside-triphosphate reductase (formate) [EC:1.1.98.6]
flye-dairy_51354_256	RGVC13048	K01939	1. Metabolism	1.4 Nucleotide metabolism	Purine metabolism	ko00230	purA, ADSS; adenylosuccinate synthase [EC:6.3.4.4]
flye-dairy_51354_256	RGVC13048	K01939	1. Metabolism	1.5 Amino acid metabolism	Alanine, aspartate and glutamate metabolism	ko00250	purA, ADSS; adenylosuccinate synthase [EC:6.3.4.4]
flye-dairy_51354_256	RGVC13048	K01939	1. Metabolism	1.0 Global and overview maps	Metabolic pathways	ko01100	purA, ADSS; adenylosuccinate synthase [EC:6.3.4.4]
flye-dairy_51354_271	RGVC13048	K02078	1. Metabolism	1.10 Biosynthesis of other secondary metabolites	Biosynthesis of various secondary metabolites - part 2	ko00998	acpP; acyl carrier protein
flye-dairy_51354_271	RGVC13048	K02078	1. Metabolism	1.0 Global and overview maps	Metabolic pathways	ko01100	acpP; acyl carrier protein
flye-dairy_51354_271	RGVC13048	K02078	1. Metabolism	1.0 Global and overview maps	Biosynthesis of secondary metabolites	ko01110	acpP; acyl carrier protein
flye-dairy_51354_271	RGVC13048	K02078	1. Metabolism	1.0 Global and overview maps	Biosynthesis of antibiotics	ko01130	acpP; acyl carrier protein
flye-dairy_52407_17	RGVC13119	K00789	1. Metabolism	1.5 Amino acid metabolism	Cysteine and methionine metabolism	ko00270	metK; S-adenosylmethionine synthetase [EC:2.5.1.6]
flye-dairy_52407_17	RGVC13119	K00789	1. Metabolism	1.0 Global and overview maps	Metabolic pathways	ko01100	metK; S-adenosylmethionine synthetase [EC:2.5.1.6]
flye-dairy_52407_17	RGVC13119	K00789	1. Metabolism	1.0 Global and overview maps	Biosynthesis of secondary metabolites	ko01110	metK; S-adenosylmethionine synthetase [EC:2.5.1.6]
flye-dairy_52407_17	RGVC13119	K00789	1. Metabolism	1.0 Global and overview maps	Biosynthesis of amino acids	ko01230	metK; S-adenosylmethionine synthetase [EC:2.5.1.6]
flye-dairy_53997_176	RGVC13222	K00969	1. Metabolism	1.8 Metabolism of cofactors and vitamins	Nicotinate and nicotinamide metabolism	ko00760	nadD; nicotinate-nucleotide adenylyltransferase [EC:2.7.7.18]
flye-dairy_53997_176	RGVC13222	K00969	1. Metabolism	1.0 Global and overview maps	Metabolic pathways	ko01100	nadD; nicotinate-nucleotide adenylyltransferase [EC:2.7.7.18]
flye-dairy_53997_306	RGVC13222	K21636	1. Metabolism	1.4 Nucleotide metabolism	Purine metabolism	ko00230	nrdD; ribonucleoside-triphosphate reductase (formate) [EC:1.1.98.6]
flye-dairy_53997_306	RGVC13222	K21636	1. Metabolism	1.4 Nucleotide metabolism	Pyrimidine metabolism	ko00240	nrdD; ribonucleoside-triphosphate reductase (formate) [EC:1.1.98.6]
flye-dairy_53997_306	RGVC13222	K21636	1. Metabolism	1.0 Global and overview maps	Metabolic pathways	ko01100	nrdD; ribonucleoside-triphosphate reductase (formate) [EC:1.1.98.6]
flye-dairy_53997_320	RGVC13222	K01520	1. Metabolism	1.4 Nucleotide metabolism	Pyrimidine metabolism	ko00240	dut, DUT; dUTP pyrophosphatase [EC:3.6.1.23]
flye-dairy_53997_320	RGVC13222	K01520	1. Metabolism	1.11 Xenobiotics biodegradation and metabolism	Drug metabolism - other enzymes	ko00983	dut, DUT; dUTP pyrophosphatase [EC:3.6.1.23]
flye-dairy_53997_320	RGVC13222	K01520	1. Metabolism	1.0 Global and overview maps	Metabolic pathways	ko01100	dut, DUT; dUTP pyrophosphatase [EC:3.6.1.23]
flye-dairy_55399_139	RGVC13351	K00789	1. Metabolism	1.5 Amino acid metabolism	Cysteine and methionine metabolism	ko00270	metK; S-adenosylmethionine synthetase [EC:2.5.1.6]
flye-dairy_55399_139	RGVC13351	K00789	1. Metabolism	1.0 Global and overview maps	Metabolic pathways	ko01100	metK; S-adenosylmethionine synthetase [EC:2.5.1.6]
flye-dairy_55399_139	RGVC13351	K00789	1. Metabolism	1.0 Global and overview maps	Biosynthesis of secondary metabolites	ko01110	metK; S-adenosylmethionine synthetase [EC:2.5.1.6]
flye-dairy_55399_139	RGVC13351	K00789	1. Metabolism	1.0 Global and overview maps	Biosynthesis of amino acids	ko01230	metK; S-adenosylmethionine synthetase [EC:2.5.1.6]
flye-dairy_55399_270	RGVC13351	K01520	1. Metabolism	1.4 Nucleotide metabolism	Pyrimidine metabolism	ko00240	dut, DUT; dUTP pyrophosphatase [EC:3.6.1.23]
flye-dairy_55399_270	RGVC13351	K01520	1. Metabolism	1.11 Xenobiotics biodegradation and metabolism	Drug metabolism - other enzymes	ko00983	dut, DUT; dUTP pyrophosphatase [EC:3.6.1.23]
flye-dairy_55399_270	RGVC13351	K01520	1. Metabolism	1.0 Global and overview maps	Metabolic pathways	ko01100	dut, DUT; dUTP pyrophosphatase [EC:3.6.1.23]
flye-dairy_55399_281	RGVC13351	K00558	1. Metabolism	1.5 Amino acid metabolism	Cysteine and methionine metabolism	ko00270	DNMT1, dcm; DNA (cytosine-5)-methyltransferase 1 [EC:2.1.1.37]
flye-dairy_55399_281	RGVC13351	K00558	1. Metabolism	1.0 Global and overview maps	Metabolic pathways	ko01100	DNMT1, dcm; DNA (cytosine-5)-methyltransferase 1 [EC:2.1.1.37]
flye-dairy_55399_281	RGVC13351	K00558	6. Human Diseases	6.1 Cancer: overview	MicroRNAs in cancer	ko05206	DNMT1, dcm; DNA (cytosine-5)-methyltransferase 1 [EC:2.1.1.37]
flye-dairy_55399_286	RGVC13351	K00558	1. Metabolism	1.5 Amino acid metabolism	Cysteine and methionine metabolism	ko00270	DNMT1, dcm; DNA (cytosine-5)-methyltransferase 1 [EC:2.1.1.37]
flye-dairy_55399_286	RGVC13351	K00558	1. Metabolism	1.0 Global and overview maps	Metabolic pathways	ko01100	DNMT1, dcm; DNA (cytosine-5)-methyltransferase 1 [EC:2.1.1.37]
flye-dairy_55399_286	RGVC13351	K00558	6. Human Diseases	6.1 Cancer: overview	MicroRNAs in cancer	ko05206	DNMT1, dcm; DNA (cytosine-5)-methyltransferase 1 [EC:2.1.1.37]
flye-dairy_55399_44	RGVC13351	K03462	1. Metabolism	1.8 Metabolism of cofactors and vitamins	Nicotinate and nicotinamide metabolism	ko00760	NAMPT; nicotinamide phosphoribosyltransferase [EC:2.4.2.12]
flye-dairy_55399_44	RGVC13351	K03462	1. Metabolism	1.0 Global and overview maps	Metabolic pathways	ko01100	NAMPT; nicotinamide phosphoribosyltransferase [EC:2.4.2.12]
flye-dairy_55399_44	RGVC13351	K03462	5. Organismal Systems	5.1 Immune system	NOD-like receptor signaling pathway	ko04621	NAMPT; nicotinamide phosphoribosyltransferase [EC:2.4.2.12]
flye-dairy_56739_135	RGVC13475	K21636	1. Metabolism	1.4 Nucleotide metabolism	Purine metabolism	ko00230	nrdD; ribonucleoside-triphosphate reductase (formate) [EC:1.1.98.6]
flye-dairy_56739_135	RGVC13475	K21636	1. Metabolism	1.4 Nucleotide metabolism	Pyrimidine metabolism	ko00240	nrdD; ribonucleoside-triphosphate reductase (formate) [EC:1.1.98.6]
flye-dairy_56739_135	RGVC13475	K21636	1. Metabolism	1.0 Global and overview maps	Metabolic pathways	ko01100	nrdD; ribonucleoside-triphosphate reductase (formate) [EC:1.1.98.6]
flye-dairy_56739_142	RGVC13475	K01520	1. Metabolism	1.4 Nucleotide metabolism	Pyrimidine metabolism	ko00240	dut, DUT; dUTP pyrophosphatase [EC:3.6.1.23]
flye-dairy_56739_142	RGVC13475	K01520	1. Metabolism	1.11 Xenobiotics biodegradation and metabolism	Drug metabolism - other enzymes	ko00983	dut, DUT; dUTP pyrophosphatase [EC:3.6.1.23]
flye-dairy_56739_142	RGVC13475	K01520	1. Metabolism	1.0 Global and overview maps	Metabolic pathways	ko01100	dut, DUT; dUTP pyrophosphatase [EC:3.6.1.23]
flye-dairy_56872_139	RGVC13482	K01885	1. Metabolism	1.8 Metabolism of cofactors and vitamins	Porphyrin and chlorophyll metabolism	ko00860	EARS, gltX; glutamyl-tRNA synthetase [EC:6.1.1.17]
flye-dairy_56872_139	RGVC13482	K01885	2. Genetic Information Processing	2.2 Translation	Aminoacyl-tRNA biosynthesis	ko00970	EARS, gltX; glutamyl-tRNA synthetase [EC:6.1.1.17]
flye-dairy_56872_139	RGVC13482	K01885	1. Metabolism	1.0 Global and overview maps	Metabolic pathways	ko01100	EARS, gltX; glutamyl-tRNA synthetase [EC:6.1.1.17]
flye-dairy_56872_139	RGVC13482	K01885	1. Metabolism	1.0 Global and overview maps	Biosynthesis of secondary metabolites	ko01110	EARS, gltX; glutamyl-tRNA synthetase [EC:6.1.1.17]
flye-dairy_56872_139	RGVC13482	K01885	1. Metabolism	1.0 Global and overview maps	Microbial metabolism in diverse environments	ko01120	EARS, gltX; glutamyl-tRNA synthetase [EC:6.1.1.17]
flye-dairy_56872_185	RGVC13482	K00763	1. Metabolism	1.8 Metabolism of cofactors and vitamins	Nicotinate and nicotinamide metabolism	ko00760	pncB, NAPRT1; nicotinate phosphoribosyltransferase [EC:6.3.4.21]
flye-dairy_56872_185	RGVC13482	K00763	1. Metabolism	1.0 Global and overview maps	Metabolic pathways	ko01100	pncB, NAPRT1; nicotinate phosphoribosyltransferase [EC:6.3.4.21]
flye-dairy_56872_34	RGVC13482	K00969	1. Metabolism	1.8 Metabolism of cofactors and vitamins	Nicotinate and nicotinamide metabolism	ko00760	nadD; nicotinate-nucleotide adenylyltransferase [EC:2.7.7.18]
flye-dairy_56872_34	RGVC13482	K00969	1. Metabolism	1.0 Global and overview maps	Metabolic pathways	ko01100	nadD; nicotinate-nucleotide adenylyltransferase [EC:2.7.7.18]
flye-dairy_56872_373	RGVC13482	K01520	1. Metabolism	1.4 Nucleotide metabolism	Pyrimidine metabolism	ko00240	dut, DUT; dUTP pyrophosphatase [EC:3.6.1.23]
flye-dairy_56872_373	RGVC13482	K01520	1. Metabolism	1.11 Xenobiotics biodegradation and metabolism	Drug metabolism - other enzymes	ko00983	dut, DUT; dUTP pyrophosphatase [EC:3.6.1.23]
flye-dairy_56872_373	RGVC13482	K01520	1. Metabolism	1.0 Global and overview maps	Metabolic pathways	ko01100	dut, DUT; dUTP pyrophosphatase [EC:3.6.1.23]
flye-dairy_56872_388	RGVC13482	K21636	1. Metabolism	1.4 Nucleotide metabolism	Purine metabolism	ko00230	nrdD; ribonucleoside-triphosphate reductase (formate) [EC:1.1.98.6]
flye-dairy_56872_388	RGVC13482	K21636	1. Metabolism	1.4 Nucleotide metabolism	Pyrimidine metabolism	ko00240	nrdD; ribonucleoside-triphosphate reductase (formate) [EC:1.1.98.6]
flye-dairy_56872_388	RGVC13482	K21636	1. Metabolism	1.0 Global and overview maps	Metabolic pathways	ko01100	nrdD; ribonucleoside-triphosphate reductase (formate) [EC:1.1.98.6]
flye-dairy_57704_128	RGVC13545	K21636	1. Metabolism	1.4 Nucleotide metabolism	Purine metabolism	ko00230	nrdD; ribonucleoside-triphosphate reductase (formate) [EC:1.1.98.6]
flye-dairy_57704_128	RGVC13545	K21636	1. Metabolism	1.4 Nucleotide metabolism	Pyrimidine metabolism	ko00240	nrdD; ribonucleoside-triphosphate reductase (formate) [EC:1.1.98.6]
flye-dairy_57704_128	RGVC13545	K21636	1. Metabolism	1.0 Global and overview maps	Metabolic pathways	ko01100	nrdD; ribonucleoside-triphosphate reductase (formate) [EC:1.1.98.6]
flye-dairy_57899_60	RGVC13567	K21636	1. Metabolism	1.4 Nucleotide metabolism	Purine metabolism	ko00230	nrdD; ribonucleoside-triphosphate reductase (formate) [EC:1.1.98.6]
flye-dairy_57899_60	RGVC13567	K21636	1. Metabolism	1.4 Nucleotide metabolism	Pyrimidine metabolism	ko00240	nrdD; ribonucleoside-triphosphate reductase (formate) [EC:1.1.98.6]
flye-dairy_57899_60	RGVC13567	K21636	1. Metabolism	1.0 Global and overview maps	Metabolic pathways	ko01100	nrdD; ribonucleoside-triphosphate reductase (formate) [EC:1.1.98.6]
flye-dairy_57899_70	RGVC13567	K00558	1. Metabolism	1.5 Amino acid metabolism	Cysteine and methionine metabolism	ko00270	DNMT1, dcm; DNA (cytosine-5)-methyltransferase 1 [EC:2.1.1.37]
flye-dairy_57899_70	RGVC13567	K00558	1. Metabolism	1.0 Global and overview maps	Metabolic pathways	ko01100	DNMT1, dcm; DNA (cytosine-5)-methyltransferase 1 [EC:2.1.1.37]
flye-dairy_57899_70	RGVC13567	K00558	6. Human Diseases	6.1 Cancer: overview	MicroRNAs in cancer	ko05206	DNMT1, dcm; DNA (cytosine-5)-methyltransferase 1 [EC:2.1.1.37]
flye-dairy_57899_8	RGVC13567	K01520	1. Metabolism	1.4 Nucleotide metabolism	Pyrimidine metabolism	ko00240	dut, DUT; dUTP pyrophosphatase [EC:3.6.1.23]
flye-dairy_57899_8	RGVC13567	K01520	1. Metabolism	1.11 Xenobiotics biodegradation and metabolism	Drug metabolism - other enzymes	ko00983	dut, DUT; dUTP pyrophosphatase [EC:3.6.1.23]
flye-dairy_57899_8	RGVC13567	K01520	1. Metabolism	1.0 Global and overview maps	Metabolic pathways	ko01100	dut, DUT; dUTP pyrophosphatase [EC:3.6.1.23]
flye-dairy_58049_55	RGVC13583	K00789	1. Metabolism	1.5 Amino acid metabolism	Cysteine and methionine metabolism	ko00270	metK; S-adenosylmethionine synthetase [EC:2.5.1.6]
flye-dairy_58049_55	RGVC13583	K00789	1. Metabolism	1.0 Global and overview maps	Metabolic pathways	ko01100	metK; S-adenosylmethionine synthetase [EC:2.5.1.6]
flye-dairy_58049_55	RGVC13583	K00789	1. Metabolism	1.0 Global and overview maps	Biosynthesis of secondary metabolites	ko01110	metK; S-adenosylmethionine synthetase [EC:2.5.1.6]
flye-dairy_58049_55	RGVC13583	K00789	1. Metabolism	1.0 Global and overview maps	Biosynthesis of amino acids	ko01230	metK; S-adenosylmethionine synthetase [EC:2.5.1.6]
flye-dairy_58843_75	RGVC13656	K00558	1. Metabolism	1.5 Amino acid metabolism	Cysteine and methionine metabolism	ko00270	DNMT1, dcm; DNA (cytosine-5)-methyltransferase 1 [EC:2.1.1.37]
flye-dairy_58843_75	RGVC13656	K00558	1. Metabolism	1.0 Global and overview maps	Metabolic pathways	ko01100	DNMT1, dcm; DNA (cytosine-5)-methyltransferase 1 [EC:2.1.1.37]
flye-dairy_58843_75	RGVC13656	K00558	6. Human Diseases	6.1 Cancer: overview	MicroRNAs in cancer	ko05206	DNMT1, dcm; DNA (cytosine-5)-methyltransferase 1 [EC:2.1.1.37]
flye-dairy_58941_81	RGVC13663	K01520	1. Metabolism	1.4 Nucleotide metabolism	Pyrimidine metabolism	ko00240	dut, DUT; dUTP pyrophosphatase [EC:3.6.1.23]
flye-dairy_58941_81	RGVC13663	K01520	1. Metabolism	1.11 Xenobiotics biodegradation and metabolism	Drug metabolism - other enzymes	ko00983	dut, DUT; dUTP pyrophosphatase [EC:3.6.1.23]
flye-dairy_58941_81	RGVC13663	K01520	1. Metabolism	1.0 Global and overview maps	Metabolic pathways	ko01100	dut, DUT; dUTP pyrophosphatase [EC:3.6.1.23]
flye-dairy_58941_90	RGVC13663	K21636	1. Metabolism	1.4 Nucleotide metabolism	Purine metabolism	ko00230	nrdD; ribonucleoside-triphosphate reductase (formate) [EC:1.1.98.6]
flye-dairy_58941_90	RGVC13663	K21636	1. Metabolism	1.4 Nucleotide metabolism	Pyrimidine metabolism	ko00240	nrdD; ribonucleoside-triphosphate reductase (formate) [EC:1.1.98.6]
flye-dairy_58941_90	RGVC13663	K21636	1. Metabolism	1.0 Global and overview maps	Metabolic pathways	ko01100	nrdD; ribonucleoside-triphosphate reductase (formate) [EC:1.1.98.6]
flye-dairy_59090_21	RGVC13676	K00789	1. Metabolism	1.5 Amino acid metabolism	Cysteine and methionine metabolism	ko00270	metK; S-adenosylmethionine synthetase [EC:2.5.1.6]
flye-dairy_59090_21	RGVC13676	K00789	1. Metabolism	1.0 Global and overview maps	Metabolic pathways	ko01100	metK; S-adenosylmethionine synthetase [EC:2.5.1.6]
flye-dairy_59090_21	RGVC13676	K00789	1. Metabolism	1.0 Global and overview maps	Biosynthesis of secondary metabolites	ko01110	metK; S-adenosylmethionine synthetase [EC:2.5.1.6]
flye-dairy_59090_21	RGVC13676	K00789	1. Metabolism	1.0 Global and overview maps	Biosynthesis of amino acids	ko01230	metK; S-adenosylmethionine synthetase [EC:2.5.1.6]
flye-dairy_59273_77	RGVC13700	K01520	1. Metabolism	1.4 Nucleotide metabolism	Pyrimidine metabolism	ko00240	dut, DUT; dUTP pyrophosphatase [EC:3.6.1.23]
flye-dairy_59273_77	RGVC13700	K01520	1. Metabolism	1.11 Xenobiotics biodegradation and metabolism	Drug metabolism - other enzymes	ko00983	dut, DUT; dUTP pyrophosphatase [EC:3.6.1.23]
flye-dairy_59273_77	RGVC13700	K01520	1. Metabolism	1.0 Global and overview maps	Metabolic pathways	ko01100	dut, DUT; dUTP pyrophosphatase [EC:3.6.1.23]
flye-dairy_59812_87	RGVC13750	K01520	1. Metabolism	1.4 Nucleotide metabolism	Pyrimidine metabolism	ko00240	dut, DUT; dUTP pyrophosphatase [EC:3.6.1.23]
flye-dairy_59812_87	RGVC13750	K01520	1. Metabolism	1.11 Xenobiotics biodegradation and metabolism	Drug metabolism - other enzymes	ko00983	dut, DUT; dUTP pyrophosphatase [EC:3.6.1.23]
flye-dairy_59812_87	RGVC13750	K01520	1. Metabolism	1.0 Global and overview maps	Metabolic pathways	ko01100	dut, DUT; dUTP pyrophosphatase [EC:3.6.1.23]
flye-dairy_59848_70	RGVC13757	K00789	1. Metabolism	1.5 Amino acid metabolism	Cysteine and methionine metabolism	ko00270	metK; S-adenosylmethionine synthetase [EC:2.5.1.6]
flye-dairy_59848_70	RGVC13757	K00789	1. Metabolism	1.0 Global and overview maps	Metabolic pathways	ko01100	metK; S-adenosylmethionine synthetase [EC:2.5.1.6]
flye-dairy_59848_70	RGVC13757	K00789	1. Metabolism	1.0 Global and overview maps	Biosynthesis of secondary metabolites	ko01110	metK; S-adenosylmethionine synthetase [EC:2.5.1.6]
flye-dairy_59848_70	RGVC13757	K00789	1. Metabolism	1.0 Global and overview maps	Biosynthesis of amino acids	ko01230	metK; S-adenosylmethionine synthetase [EC:2.5.1.6]
flye-dairy_60181_7	RGVC13802	K00789	1. Metabolism	1.5 Amino acid metabolism	Cysteine and methionine metabolism	ko00270	metK; S-adenosylmethionine synthetase [EC:2.5.1.6]
flye-dairy_60181_7	RGVC13802	K00789	1. Metabolism	1.0 Global and overview maps	Metabolic pathways	ko01100	metK; S-adenosylmethionine synthetase [EC:2.5.1.6]
flye-dairy_60181_7	RGVC13802	K00789	1. Metabolism	1.0 Global and overview maps	Biosynthesis of secondary metabolites	ko01110	metK; S-adenosylmethionine synthetase [EC:2.5.1.6]
flye-dairy_60181_7	RGVC13802	K00789	1. Metabolism	1.0 Global and overview maps	Biosynthesis of amino acids	ko01230	metK; S-adenosylmethionine synthetase [EC:2.5.1.6]
flye-dairy_61352_49	RGVC13920	K00558	1. Metabolism	1.5 Amino acid metabolism	Cysteine and methionine metabolism	ko00270	DNMT1, dcm; DNA (cytosine-5)-methyltransferase 1 [EC:2.1.1.37]
flye-dairy_61352_49	RGVC13920	K00558	1. Metabolism	1.0 Global and overview maps	Metabolic pathways	ko01100	DNMT1, dcm; DNA (cytosine-5)-methyltransferase 1 [EC:2.1.1.37]
flye-dairy_61352_49	RGVC13920	K00558	6. Human Diseases	6.1 Cancer: overview	MicroRNAs in cancer	ko05206	DNMT1, dcm; DNA (cytosine-5)-methyltransferase 1 [EC:2.1.1.37]
flye-dairy_6336_115	RGVC14140	K01939	1. Metabolism	1.4 Nucleotide metabolism	Purine metabolism	ko00230	purA, ADSS; adenylosuccinate synthase [EC:6.3.4.4]
flye-dairy_6336_115	RGVC14140	K01939	1. Metabolism	1.5 Amino acid metabolism	Alanine, aspartate and glutamate metabolism	ko00250	purA, ADSS; adenylosuccinate synthase [EC:6.3.4.4]
flye-dairy_6336_115	RGVC14140	K01939	1. Metabolism	1.0 Global and overview maps	Metabolic pathways	ko01100	purA, ADSS; adenylosuccinate synthase [EC:6.3.4.4]
flye-dairy_6336_169	RGVC14140	K03462	1. Metabolism	1.8 Metabolism of cofactors and vitamins	Nicotinate and nicotinamide metabolism	ko00760	NAMPT; nicotinamide phosphoribosyltransferase [EC:2.4.2.12]
flye-dairy_6336_169	RGVC14140	K03462	1. Metabolism	1.0 Global and overview maps	Metabolic pathways	ko01100	NAMPT; nicotinamide phosphoribosyltransferase [EC:2.4.2.12]
flye-dairy_6336_169	RGVC14140	K03462	5. Organismal Systems	5.1 Immune system	NOD-like receptor signaling pathway	ko04621	NAMPT; nicotinamide phosphoribosyltransferase [EC:2.4.2.12]
flye-dairy_6336_55	RGVC14140	K01520	1. Metabolism	1.4 Nucleotide metabolism	Pyrimidine metabolism	ko00240	dut, DUT; dUTP pyrophosphatase [EC:3.6.1.23]
flye-dairy_6336_55	RGVC14140	K01520	1. Metabolism	1.11 Xenobiotics biodegradation and metabolism	Drug metabolism - other enzymes	ko00983	dut, DUT; dUTP pyrophosphatase [EC:3.6.1.23]
flye-dairy_6336_55	RGVC14140	K01520	1. Metabolism	1.0 Global and overview maps	Metabolic pathways	ko01100	dut, DUT; dUTP pyrophosphatase [EC:3.6.1.23]
flye-dairy_6336_61	RGVC14140	K21636	1. Metabolism	1.4 Nucleotide metabolism	Purine metabolism	ko00230	nrdD; ribonucleoside-triphosphate reductase (formate) [EC:1.1.98.6]
flye-dairy_6336_61	RGVC14140	K21636	1. Metabolism	1.4 Nucleotide metabolism	Pyrimidine metabolism	ko00240	nrdD; ribonucleoside-triphosphate reductase (formate) [EC:1.1.98.6]
flye-dairy_6336_61	RGVC14140	K21636	1. Metabolism	1.0 Global and overview maps	Metabolic pathways	ko01100	nrdD; ribonucleoside-triphosphate reductase (formate) [EC:1.1.98.6]
flye-dairy_63689_25	RGVC14187	K00789	1. Metabolism	1.5 Amino acid metabolism	Cysteine and methionine metabolism	ko00270	metK; S-adenosylmethionine synthetase [EC:2.5.1.6]
flye-dairy_63689_25	RGVC14187	K00789	1. Metabolism	1.0 Global and overview maps	Metabolic pathways	ko01100	metK; S-adenosylmethionine synthetase [EC:2.5.1.6]
flye-dairy_63689_25	RGVC14187	K00789	1. Metabolism	1.0 Global and overview maps	Biosynthesis of secondary metabolites	ko01110	metK; S-adenosylmethionine synthetase [EC:2.5.1.6]
flye-dairy_63689_25	RGVC14187	K00789	1. Metabolism	1.0 Global and overview maps	Biosynthesis of amino acids	ko01230	metK; S-adenosylmethionine synthetase [EC:2.5.1.6]
flye-dairy_64721_88	RGVC14291	K01520	1. Metabolism	1.4 Nucleotide metabolism	Pyrimidine metabolism	ko00240	dut, DUT; dUTP pyrophosphatase [EC:3.6.1.23]
flye-dairy_64721_88	RGVC14291	K01520	1. Metabolism	1.11 Xenobiotics biodegradation and metabolism	Drug metabolism - other enzymes	ko00983	dut, DUT; dUTP pyrophosphatase [EC:3.6.1.23]
flye-dairy_64721_88	RGVC14291	K01520	1. Metabolism	1.0 Global and overview maps	Metabolic pathways	ko01100	dut, DUT; dUTP pyrophosphatase [EC:3.6.1.23]
flye-dairy_64721_92	RGVC14291	K21636	1. Metabolism	1.4 Nucleotide metabolism	Purine metabolism	ko00230	nrdD; ribonucleoside-triphosphate reductase (formate) [EC:1.1.98.6]
flye-dairy_64721_92	RGVC14291	K21636	1. Metabolism	1.4 Nucleotide metabolism	Pyrimidine metabolism	ko00240	nrdD; ribonucleoside-triphosphate reductase (formate) [EC:1.1.98.6]
flye-dairy_64721_92	RGVC14291	K21636	1. Metabolism	1.0 Global and overview maps	Metabolic pathways	ko01100	nrdD; ribonucleoside-triphosphate reductase (formate) [EC:1.1.98.6]
flye-dairy_65432_12	RGVC14358	K00789	1. Metabolism	1.5 Amino acid metabolism	Cysteine and methionine metabolism	ko00270	metK; S-adenosylmethionine synthetase [EC:2.5.1.6]
flye-dairy_65432_12	RGVC14358	K00789	1. Metabolism	1.0 Global and overview maps	Metabolic pathways	ko01100	metK; S-adenosylmethionine synthetase [EC:2.5.1.6]
flye-dairy_65432_12	RGVC14358	K00789	1. Metabolism	1.0 Global and overview maps	Biosynthesis of secondary metabolites	ko01110	metK; S-adenosylmethionine synthetase [EC:2.5.1.6]
flye-dairy_65432_12	RGVC14358	K00789	1. Metabolism	1.0 Global and overview maps	Biosynthesis of amino acids	ko01230	metK; S-adenosylmethionine synthetase [EC:2.5.1.6]
flye-dairy_65896_58	RGVC14408	K01520	1. Metabolism	1.4 Nucleotide metabolism	Pyrimidine metabolism	ko00240	dut, DUT; dUTP pyrophosphatase [EC:3.6.1.23]
flye-dairy_65896_58	RGVC14408	K01520	1. Metabolism	1.11 Xenobiotics biodegradation and metabolism	Drug metabolism - other enzymes	ko00983	dut, DUT; dUTP pyrophosphatase [EC:3.6.1.23]
flye-dairy_65896_58	RGVC14408	K01520	1. Metabolism	1.0 Global and overview maps	Metabolic pathways	ko01100	dut, DUT; dUTP pyrophosphatase [EC:3.6.1.23]
flye-dairy_66830_79	RGVC14523	K01520	1. Metabolism	1.4 Nucleotide metabolism	Pyrimidine metabolism	ko00240	dut, DUT; dUTP pyrophosphatase [EC:3.6.1.23]
flye-dairy_66830_79	RGVC14523	K01520	1. Metabolism	1.11 Xenobiotics biodegradation and metabolism	Drug metabolism - other enzymes	ko00983	dut, DUT; dUTP pyrophosphatase [EC:3.6.1.23]
flye-dairy_66830_79	RGVC14523	K01520	1. Metabolism	1.0 Global and overview maps	Metabolic pathways	ko01100	dut, DUT; dUTP pyrophosphatase [EC:3.6.1.23]
flye-dairy_67557_13	RGVC14611	K01520	1. Metabolism	1.4 Nucleotide metabolism	Pyrimidine metabolism	ko00240	dut, DUT; dUTP pyrophosphatase [EC:3.6.1.23]
flye-dairy_67557_13	RGVC14611	K01520	1. Metabolism	1.11 Xenobiotics biodegradation and metabolism	Drug metabolism - other enzymes	ko00983	dut, DUT; dUTP pyrophosphatase [EC:3.6.1.23]
flye-dairy_67557_13	RGVC14611	K01520	1. Metabolism	1.0 Global and overview maps	Metabolic pathways	ko01100	dut, DUT; dUTP pyrophosphatase [EC:3.6.1.23]
flye-dairy_67557_64	RGVC14611	K21636	1. Metabolism	1.4 Nucleotide metabolism	Purine metabolism	ko00230	nrdD; ribonucleoside-triphosphate reductase (formate) [EC:1.1.98.6]
flye-dairy_67557_64	RGVC14611	K21636	1. Metabolism	1.4 Nucleotide metabolism	Pyrimidine metabolism	ko00240	nrdD; ribonucleoside-triphosphate reductase (formate) [EC:1.1.98.6]
flye-dairy_67557_64	RGVC14611	K21636	1. Metabolism	1.0 Global and overview maps	Metabolic pathways	ko01100	nrdD; ribonucleoside-triphosphate reductase (formate) [EC:1.1.98.6]
flye-dairy_67557_68	RGVC14611	K00558	1. Metabolism	1.5 Amino acid metabolism	Cysteine and methionine metabolism	ko00270	DNMT1, dcm; DNA (cytosine-5)-methyltransferase 1 [EC:2.1.1.37]
flye-dairy_67557_68	RGVC14611	K00558	1. Metabolism	1.0 Global and overview maps	Metabolic pathways	ko01100	DNMT1, dcm; DNA (cytosine-5)-methyltransferase 1 [EC:2.1.1.37]
flye-dairy_67557_68	RGVC14611	K00558	6. Human Diseases	6.1 Cancer: overview	MicroRNAs in cancer	ko05206	DNMT1, dcm; DNA (cytosine-5)-methyltransferase 1 [EC:2.1.1.37]
flye-dairy_68612_104	RGVC14723	K01520	1. Metabolism	1.4 Nucleotide metabolism	Pyrimidine metabolism	ko00240	dut, DUT; dUTP pyrophosphatase [EC:3.6.1.23]
flye-dairy_68612_104	RGVC14723	K01520	1. Metabolism	1.11 Xenobiotics biodegradation and metabolism	Drug metabolism - other enzymes	ko00983	dut, DUT; dUTP pyrophosphatase [EC:3.6.1.23]
flye-dairy_68612_104	RGVC14723	K01520	1. Metabolism	1.0 Global and overview maps	Metabolic pathways	ko01100	dut, DUT; dUTP pyrophosphatase [EC:3.6.1.23]
flye-dairy_68612_49	RGVC14723	K01939	1. Metabolism	1.4 Nucleotide metabolism	Purine metabolism	ko00230	purA, ADSS; adenylosuccinate synthase [EC:6.3.4.4]
flye-dairy_68612_49	RGVC14723	K01939	1. Metabolism	1.5 Amino acid metabolism	Alanine, aspartate and glutamate metabolism	ko00250	purA, ADSS; adenylosuccinate synthase [EC:6.3.4.4]
flye-dairy_68612_49	RGVC14723	K01939	1. Metabolism	1.0 Global and overview maps	Metabolic pathways	ko01100	purA, ADSS; adenylosuccinate synthase [EC:6.3.4.4]
flye-dairy_69280_1_72	RGVC14793	K00558	1. Metabolism	1.5 Amino acid metabolism	Cysteine and methionine metabolism	ko00270	DNMT1, dcm; DNA (cytosine-5)-methyltransferase 1 [EC:2.1.1.37]
flye-dairy_69280_1_72	RGVC14793	K00558	1. Metabolism	1.0 Global and overview maps	Metabolic pathways	ko01100	DNMT1, dcm; DNA (cytosine-5)-methyltransferase 1 [EC:2.1.1.37]
flye-dairy_69280_1_72	RGVC14793	K00558	6. Human Diseases	6.1 Cancer: overview	MicroRNAs in cancer	ko05206	DNMT1, dcm; DNA (cytosine-5)-methyltransferase 1 [EC:2.1.1.37]
flye-dairy_69280_1_93	RGVC14793	K01494	1. Metabolism	1.4 Nucleotide metabolism	Pyrimidine metabolism	ko00240	dcd; dCTP deaminase [EC:3.5.4.13]
flye-dairy_69280_1_93	RGVC14793	K01494	1. Metabolism	1.0 Global and overview maps	Metabolic pathways	ko01100	dcd; dCTP deaminase [EC:3.5.4.13]
flye-dairy_71261_88	RGVC15047	K01939	1. Metabolism	1.4 Nucleotide metabolism	Purine metabolism	ko00230	purA, ADSS; adenylosuccinate synthase [EC:6.3.4.4]
flye-dairy_71261_88	RGVC15047	K01939	1. Metabolism	1.5 Amino acid metabolism	Alanine, aspartate and glutamate metabolism	ko00250	purA, ADSS; adenylosuccinate synthase [EC:6.3.4.4]
flye-dairy_71261_88	RGVC15047	K01939	1. Metabolism	1.0 Global and overview maps	Metabolic pathways	ko01100	purA, ADSS; adenylosuccinate synthase [EC:6.3.4.4]
flye-dairy_71391_57	RGVC15080	K01520	1. Metabolism	1.4 Nucleotide metabolism	Pyrimidine metabolism	ko00240	dut, DUT; dUTP pyrophosphatase [EC:3.6.1.23]
flye-dairy_71391_57	RGVC15080	K01520	1. Metabolism	1.11 Xenobiotics biodegradation and metabolism	Drug metabolism - other enzymes	ko00983	dut, DUT; dUTP pyrophosphatase [EC:3.6.1.23]
flye-dairy_71391_57	RGVC15080	K01520	1. Metabolism	1.0 Global and overview maps	Metabolic pathways	ko01100	dut, DUT; dUTP pyrophosphatase [EC:3.6.1.23]
flye-dairy_72631_88	RGVC15187	K01520	1. Metabolism	1.4 Nucleotide metabolism	Pyrimidine metabolism	ko00240	dut, DUT; dUTP pyrophosphatase [EC:3.6.1.23]
flye-dairy_72631_88	RGVC15187	K01520	1. Metabolism	1.11 Xenobiotics biodegradation and metabolism	Drug metabolism - other enzymes	ko00983	dut, DUT; dUTP pyrophosphatase [EC:3.6.1.23]
flye-dairy_72631_88	RGVC15187	K01520	1. Metabolism	1.0 Global and overview maps	Metabolic pathways	ko01100	dut, DUT; dUTP pyrophosphatase [EC:3.6.1.23]
flye-dairy_72657_136	RGVC15191	K01939	1. Metabolism	1.4 Nucleotide metabolism	Purine metabolism	ko00230	purA, ADSS; adenylosuccinate synthase [EC:6.3.4.4]
flye-dairy_72657_136	RGVC15191	K01939	1. Metabolism	1.5 Amino acid metabolism	Alanine, aspartate and glutamate metabolism	ko00250	purA, ADSS; adenylosuccinate synthase [EC:6.3.4.4]
flye-dairy_72657_136	RGVC15191	K01939	1. Metabolism	1.0 Global and overview maps	Metabolic pathways	ko01100	purA, ADSS; adenylosuccinate synthase [EC:6.3.4.4]
flye-dairy_72657_89	RGVC15191	K01520	1. Metabolism	1.4 Nucleotide metabolism	Pyrimidine metabolism	ko00240	dut, DUT; dUTP pyrophosphatase [EC:3.6.1.23]
flye-dairy_72657_89	RGVC15191	K01520	1. Metabolism	1.11 Xenobiotics biodegradation and metabolism	Drug metabolism - other enzymes	ko00983	dut, DUT; dUTP pyrophosphatase [EC:3.6.1.23]
flye-dairy_72657_89	RGVC15191	K01520	1. Metabolism	1.0 Global and overview maps	Metabolic pathways	ko01100	dut, DUT; dUTP pyrophosphatase [EC:3.6.1.23]
flye-dairy_72657_92	RGVC15191	K21636	1. Metabolism	1.4 Nucleotide metabolism	Purine metabolism	ko00230	nrdD; ribonucleoside-triphosphate reductase (formate) [EC:1.1.98.6]
flye-dairy_72657_92	RGVC15191	K21636	1. Metabolism	1.4 Nucleotide metabolism	Pyrimidine metabolism	ko00240	nrdD; ribonucleoside-triphosphate reductase (formate) [EC:1.1.98.6]
flye-dairy_72657_92	RGVC15191	K21636	1. Metabolism	1.0 Global and overview maps	Metabolic pathways	ko01100	nrdD; ribonucleoside-triphosphate reductase (formate) [EC:1.1.98.6]
flye-dairy_72935_150	RGVC15213	K02078	1. Metabolism	1.10 Biosynthesis of other secondary metabolites	Biosynthesis of various secondary metabolites - part 2	ko00998	acpP; acyl carrier protein
flye-dairy_72935_150	RGVC15213	K02078	1. Metabolism	1.0 Global and overview maps	Metabolic pathways	ko01100	acpP; acyl carrier protein
flye-dairy_72935_150	RGVC15213	K02078	1. Metabolism	1.0 Global and overview maps	Biosynthesis of secondary metabolites	ko01110	acpP; acyl carrier protein
flye-dairy_72935_150	RGVC15213	K02078	1. Metabolism	1.0 Global and overview maps	Biosynthesis of antibiotics	ko01130	acpP; acyl carrier protein
flye-dairy_72935_207	RGVC15213	K01520	1. Metabolism	1.4 Nucleotide metabolism	Pyrimidine metabolism	ko00240	dut, DUT; dUTP pyrophosphatase [EC:3.6.1.23]
flye-dairy_72935_207	RGVC15213	K01520	1. Metabolism	1.11 Xenobiotics biodegradation and metabolism	Drug metabolism - other enzymes	ko00983	dut, DUT; dUTP pyrophosphatase [EC:3.6.1.23]
flye-dairy_72935_207	RGVC15213	K01520	1. Metabolism	1.0 Global and overview maps	Metabolic pathways	ko01100	dut, DUT; dUTP pyrophosphatase [EC:3.6.1.23]
flye-dairy_73059_1_213	RGVC15221	K01520	1. Metabolism	1.4 Nucleotide metabolism	Pyrimidine metabolism	ko00240	dut, DUT; dUTP pyrophosphatase [EC:3.6.1.23]
flye-dairy_73059_1_213	RGVC15221	K01520	1. Metabolism	1.11 Xenobiotics biodegradation and metabolism	Drug metabolism - other enzymes	ko00983	dut, DUT; dUTP pyrophosphatase [EC:3.6.1.23]
flye-dairy_73059_1_213	RGVC15221	K01520	1. Metabolism	1.0 Global and overview maps	Metabolic pathways	ko01100	dut, DUT; dUTP pyrophosphatase [EC:3.6.1.23]
flye-dairy_73059_1_257	RGVC15221	K01939	1. Metabolism	1.4 Nucleotide metabolism	Purine metabolism	ko00230	purA, ADSS; adenylosuccinate synthase [EC:6.3.4.4]
flye-dairy_73059_1_257	RGVC15221	K01939	1. Metabolism	1.5 Amino acid metabolism	Alanine, aspartate and glutamate metabolism	ko00250	purA, ADSS; adenylosuccinate synthase [EC:6.3.4.4]
flye-dairy_73059_1_257	RGVC15221	K01939	1. Metabolism	1.0 Global and overview maps	Metabolic pathways	ko01100	purA, ADSS; adenylosuccinate synthase [EC:6.3.4.4]
[truncated: 2,738 more rows]

## Sheet: Table S24
Table S24. AMGs with carbohydrate-active enzymes (CAZymes) annotations
Gene	Genome	ID	Category
[truncated: 118 more rows]

## Sheet: Table S25
Table S25. AMGs with the Peptidase Database (MEROPS) annotations
[truncated: 41 more rows]
