# Supplementary material for: Spatial heterogeneity of viral communities across the gastrointestinal tracts of ruminants
Source: Research Square preprint supplement (doi:10.21203/rs.3.rs-4244627/v1), 2024-04-10
Supplement: Supplementary file 15 [file f83bcff6b25a8af2bde2e944.xlsx]

## Sheet: Table S19
Table S19. Overview of the lifestyles of vOTUs
RGVC	Lifestyle	Method
RGVC1	Lysogenic	Signal
RGVC2	Unknown
RGVC3	Lysogenic	Signal
RGVC4	Lysogenic	Signal
RGVC5	Unknown
RGVC6	Lysogenic	Signal
RGVC7	Lysogenic	Signal
RGVC8	Lysogenic	Signal
RGVC9	Lysogenic	Signal
RGVC10	Unknown
RGVC11	Lysogenic	Signal
RGVC12	Lysogenic	Signal/Provirus
RGVC13	Unknown
RGVC14	Unknown
RGVC15	Unknown
RGVC16	Unknown
RGVC17	Lysogenic	Signal/Provirus
RGVC18	Lysogenic	Signal
RGVC19	Lysogenic	Signal/Provirus
RGVC20	Lysogenic	Signal
RGVC21	Lysogenic	Signal/Provirus
RGVC22	Lysogenic	Signal
RGVC23	Lysogenic	Provirus
RGVC24	Unknown
RGVC25	Lysogenic	Signal/Provirus
RGVC26	Lysogenic	Signal
RGVC27	Lysogenic	Provirus
RGVC28	Lysogenic	Signal/Provirus
RGVC29	Unknown
RGVC30	Lysogenic	Signal/Provirus
RGVC31	Lysogenic	Signal
RGVC32	Unknown
RGVC33	Unknown
RGVC34	Lysogenic	Signal/Provirus
RGVC35	Unknown
RGVC36	Lysogenic	Signal/Provirus
RGVC37	Lysogenic	Signal
RGVC38	Lysogenic	Signal/Provirus
RGVC39	Unknown
RGVC40	Lysogenic	Signal
RGVC41	Lysogenic	Provirus
RGVC42	Lysogenic	Signal
RGVC43	Unknown
RGVC44	Lysogenic	Signal
RGVC45	Lysogenic	Signal
RGVC46	Unknown
RGVC47	Unknown
RGVC48	Lysogenic	Signal
RGVC49	Unknown
RGVC50	Unknown
RGVC51	Lysogenic	Signal
RGVC52	Unknown
RGVC53	Lysogenic	Signal
RGVC54	Lysogenic	Signal
RGVC55	Unknown
RGVC56	Lysogenic	Signal
RGVC57	Lysogenic	Signal/Provirus
RGVC58	Unknown
RGVC59	Lysogenic	Signal/Provirus
RGVC60	Unknown
RGVC61	Lysogenic	Signal
RGVC62	Unknown
RGVC63	Unknown
RGVC64	Lysogenic	Signal
RGVC65	Lysogenic	Signal
RGVC66	Lysogenic	Signal
RGVC67	Lysogenic	Signal
RGVC68	Lysogenic	Signal/Provirus
RGVC69	Lysogenic	Signal
RGVC70	Lysogenic	Signal
RGVC71	Lysogenic	Signal
RGVC72	Unknown
RGVC73	Lysogenic	Signal/Provirus
RGVC74	Lysogenic	Signal
RGVC75	Unknown
RGVC76	Lysogenic	Signal
RGVC77	Lysogenic	Signal/Provirus
RGVC78	Lysogenic	Signal
RGVC79	Lysogenic	Signal
RGVC80	Unknown
RGVC81	Lysogenic	Signal
RGVC82	Lysogenic	Signal
RGVC83	Lysogenic	Signal
RGVC84	Lysogenic	Signal
RGVC85	Lysogenic	Signal
RGVC86	Unknown
RGVC87	Unknown
RGVC88	Lysogenic	Signal
RGVC89	Lysogenic	Signal
RGVC90	Lysogenic	Signal
RGVC91	Unknown
RGVC92	Unknown
RGVC93	Unknown
RGVC94	Lysogenic	Signal
RGVC95	Lysogenic	Signal/Provirus
RGVC96	Lysogenic	Signal
RGVC97	Unknown
RGVC98	Unknown
RGVC99	Unknown
RGVC100	Lysogenic	Signal
RGVC101	Unknown
RGVC102	Lysogenic	Signal
RGVC103	Unknown
RGVC104	Lysogenic	Signal/Provirus
RGVC105	Unknown
RGVC106	Lysogenic	Signal/Provirus
RGVC107	Lysogenic	Signal
RGVC108	Unknown
RGVC109	Unknown
RGVC110	Lysogenic	Signal/Provirus
RGVC111	Unknown
RGVC112	Lysogenic	Signal
RGVC113	Unknown
RGVC114	Lysogenic	Signal
RGVC115	Unknown
RGVC116	Lysogenic	Signal
RGVC117	Lysogenic	Provirus
RGVC118	Unknown
RGVC119	Unknown
RGVC120	Unknown
RGVC121	Unknown
RGVC122	Unknown
RGVC123	Unknown
RGVC124	Unknown
RGVC125	Lysogenic	Signal
RGVC126	Unknown
RGVC127	Unknown
RGVC128	Lysogenic	Signal
RGVC129	Lysogenic	Provirus
RGVC130	Unknown
RGVC131	Unknown
RGVC132	Unknown
RGVC133	Lysogenic	Signal
RGVC134	Lysogenic	Signal
RGVC135	Lysogenic	Signal
RGVC136	Lysogenic	Signal
RGVC137	Unknown
RGVC138	Unknown
RGVC139	Lysogenic	Signal/Provirus
RGVC140	Lysogenic	Signal/Provirus
RGVC141	Lysogenic	Signal
RGVC142	Lysogenic	Signal
RGVC143	Unknown
RGVC144	Unknown
RGVC145	Unknown
RGVC146	Unknown
RGVC147	Lysogenic	Signal
RGVC148	Unknown
RGVC149	Lysogenic	Signal
RGVC150	Lysogenic	Signal/Provirus
RGVC151	Lysogenic	Signal/Provirus
RGVC152	Lysogenic	Signal
RGVC153	Unknown
RGVC154	Unknown
RGVC155	Lysogenic	Signal
RGVC156	Lysogenic	Signal
RGVC157	Lysogenic	Signal
RGVC158	Unknown
RGVC159	Lysogenic	Provirus
RGVC160	Unknown
RGVC161	Lysogenic	Signal/Provirus
RGVC162	Unknown
RGVC163	Unknown
RGVC164	Unknown
RGVC165	Unknown
RGVC166	Lysogenic	Signal
RGVC167	Unknown
RGVC168	Lysogenic	Signal/Provirus
RGVC169	Unknown
RGVC170	Unknown
RGVC171	Lysogenic	Signal
RGVC172	Unknown
RGVC173	Lysogenic	Provirus
RGVC174	Unknown
RGVC175	Unknown
RGVC176	Unknown
RGVC177	Lysogenic	Provirus
RGVC178	Lysogenic	Signal
RGVC179	Unknown
RGVC180	Unknown
RGVC181	Lysogenic	Provirus
RGVC182	Unknown
RGVC183	Unknown
RGVC184	Lysogenic	Signal
RGVC185	Unknown
RGVC186	Unknown
RGVC187	Lysogenic	Signal
RGVC188	Lysogenic	Signal/Provirus
RGVC189	Lysogenic	Signal
RGVC190	Lysogenic	Signal
RGVC191	Unknown
RGVC192	Unknown
RGVC193	Unknown
RGVC194	Lysogenic	Signal
RGVC195	Lysogenic	Signal/Provirus
RGVC196	Unknown
RGVC197	Lysogenic	Signal
RGVC198	Lysogenic	Signal
RGVC199	Lysogenic	Signal
RGVC200	Unknown
RGVC201	Lysogenic	Signal
RGVC202	Lysogenic	Provirus
RGVC203	Lysogenic	Signal
RGVC204	Unknown
RGVC205	Lysogenic	Signal
RGVC206	Lysogenic	Signal
RGVC207	Lysogenic	Provirus
RGVC208	Unknown
RGVC209	Lysogenic	Signal
RGVC210	Lysogenic	Signal/Provirus
RGVC211	Unknown
RGVC212	Lysogenic	Signal
RGVC213	Unknown
RGVC214	Unknown
RGVC215	Lysogenic	Signal/Provirus
RGVC216	Unknown
RGVC217	Lysogenic	Signal
RGVC218	Lysogenic	Provirus
RGVC219	Unknown
RGVC220	Unknown
RGVC221	Lysogenic	Signal
RGVC222	Lysogenic	Signal
RGVC223	Lysogenic	Signal
RGVC224	Unknown
RGVC225	Unknown
RGVC226	Lysogenic	Signal
RGVC227	Lysogenic	Signal/Provirus
RGVC228	Unknown
RGVC229	Unknown
RGVC230	Lysogenic	Signal
RGVC231	Lysogenic	Provirus
RGVC232	Lysogenic	Signal/Provirus
RGVC233	Unknown
RGVC234	Lysogenic	Signal
RGVC235	Unknown
RGVC236	Lysogenic	Signal
RGVC237	Lysogenic	Signal
RGVC238	Unknown
RGVC239	Lysogenic	Signal/Provirus
RGVC240	Lysogenic	Signal
RGVC241	Lysogenic	Provirus
RGVC242	Lysogenic	Signal
RGVC243	Lysogenic	Signal/Provirus
RGVC244	Lysogenic	Signal
RGVC245	Lysogenic	Signal/Provirus
RGVC246	Lysogenic	Signal
RGVC247	Unknown
RGVC248	Unknown
RGVC249	Unknown
RGVC250	Lysogenic	Signal
RGVC251	Lysogenic	Signal
RGVC252	Lysogenic	Signal
RGVC253	Lysogenic	Signal/Provirus
RGVC254	Lysogenic	Signal
RGVC255	Lysogenic	Signal/Provirus
RGVC256	Lysogenic	Signal
RGVC257	Lysogenic	Signal
RGVC258	Unknown
RGVC259	Lysogenic	Signal
RGVC260	Lysogenic	Signal
RGVC261	Unknown
RGVC262	Lysogenic	Signal
RGVC263	Lysogenic	Signal
RGVC264	Unknown
RGVC265	Lysogenic	Signal
RGVC266	Unknown
RGVC267	Lysogenic	Signal
RGVC268	Lysogenic	Provirus
RGVC269	Unknown
RGVC270	Lysogenic	Signal
RGVC271	Lysogenic	Signal
RGVC272	Unknown
RGVC273	Lysogenic	Signal
RGVC274	Unknown
RGVC275	Lytic
RGVC276	Lysogenic	Signal
RGVC277	Lysogenic	Signal
RGVC278	Lysogenic	Provirus
RGVC279	Lysogenic	Signal
RGVC280	Lysogenic	Signal
RGVC281	Unknown
RGVC282	Lysogenic	Signal
RGVC283	Unknown
RGVC284	Unknown
RGVC285	Lysogenic	Signal
RGVC286	Lysogenic	Signal
RGVC287	Lysogenic	Provirus
RGVC288	Lysogenic	Signal
RGVC289	Lysogenic	Signal
RGVC290	Unknown
RGVC291	Unknown
RGVC292	Lysogenic	Signal/Provirus
RGVC293	Unknown
RGVC294	Lysogenic	Signal
RGVC295	Lysogenic	Signal/Provirus
RGVC296	Unknown
RGVC297	Lysogenic	Signal
RGVC298	Lysogenic	Signal
RGVC299	Unknown
RGVC300	Unknown
RGVC301	Unknown
RGVC302	Unknown
RGVC303	Unknown
RGVC304	Lysogenic	Signal
RGVC305	Lysogenic	Signal/Provirus
RGVC306	Lysogenic	Signal
RGVC307	Lysogenic	Signal
RGVC308	Unknown
RGVC309	Unknown
RGVC310	Unknown
RGVC311	Unknown
RGVC312	Unknown
RGVC313	Lysogenic	Signal
RGVC314	Unknown
RGVC315	Unknown
RGVC316	Unknown
RGVC317	Unknown
RGVC318	Lysogenic	Signal/Provirus
RGVC319	Lysogenic	Signal/Provirus
RGVC320	Unknown
RGVC321	Lysogenic	Signal
RGVC322	Lysogenic	Signal
RGVC323	Lysogenic	Provirus
RGVC324	Lysogenic	Signal
RGVC325	Unknown
RGVC326	Unknown
RGVC327	Lysogenic	Signal
RGVC328	Lysogenic	Signal
RGVC329	Lysogenic	Signal
RGVC330	Unknown
RGVC331	Lysogenic	Signal
RGVC332	Lysogenic	Signal
RGVC333	Lysogenic	Signal/Provirus
RGVC334	Unknown
RGVC335	Unknown
RGVC336	Lysogenic	Signal/Provirus
RGVC337	Lysogenic	Signal/Provirus
RGVC338	Lysogenic	Signal
RGVC339	Lysogenic	Signal/Provirus
RGVC340	Lysogenic	Signal
RGVC341	Unknown
RGVC342	Lysogenic	Signal/Provirus
RGVC343	Unknown
RGVC344	Unknown
RGVC345	Unknown
RGVC346	Unknown
RGVC347	Lysogenic	Signal
RGVC348	Lysogenic	Signal
RGVC349	Unknown
RGVC350	Lysogenic	Signal/Provirus
RGVC351	Lysogenic	Signal
RGVC352	Unknown
RGVC353	Unknown
RGVC354	Lysogenic	Signal
RGVC355	Lysogenic	Signal
RGVC356	Unknown
RGVC357	Unknown
RGVC358	Lysogenic	Signal
RGVC359	Lysogenic	Signal
RGVC360	Lysogenic	Signal/Provirus
RGVC361	Lysogenic	Signal/Provirus
RGVC362	Unknown
RGVC363	Unknown
RGVC364	Unknown
RGVC365	Unknown
RGVC366	Unknown
RGVC367	Unknown
RGVC368	Lysogenic	Signal
RGVC369	Unknown
RGVC370	Lysogenic	Signal
RGVC371	Lysogenic	Signal/Provirus
RGVC372	Lysogenic	Signal
RGVC373	Lysogenic	Signal/Provirus
RGVC374	Lysogenic	Signal/Provirus
RGVC375	Lysogenic	Signal
RGVC376	Unknown
RGVC377	Unknown
RGVC378	Lysogenic	Signal
RGVC379	Lysogenic	Signal
RGVC380	Unknown
RGVC381	Lysogenic	Signal
RGVC382	Lysogenic	Signal
RGVC383	Lysogenic	Signal
RGVC384	Unknown
RGVC385	Unknown
RGVC386	Unknown
RGVC387	Unknown
RGVC388	Unknown
RGVC389	Lysogenic	Signal
RGVC390	Lysogenic	Signal
RGVC391	Lysogenic	Signal
RGVC392	Lysogenic	Signal
RGVC393	Unknown
RGVC394	Unknown
RGVC395	Unknown
RGVC396	Lysogenic	Signal
RGVC397	Lysogenic	Provirus
RGVC398	Lysogenic	Signal
RGVC399	Lysogenic	Signal/Provirus
RGVC400	Lysogenic	Signal
RGVC401	Unknown
RGVC402	Lysogenic	Signal
RGVC403	Lysogenic	Signal
RGVC404	Lysogenic	Signal
RGVC405	Unknown
RGVC406	Unknown
RGVC407	Lysogenic	Signal
RGVC408	Unknown
RGVC409	Lysogenic	Provirus
RGVC410	Lysogenic	Signal
RGVC411	Lysogenic	Signal
RGVC412	Lysogenic	Signal
RGVC413	Unknown
RGVC414	Lysogenic	Signal
RGVC415	Lysogenic	Signal
RGVC416	Lysogenic	Signal
RGVC417	Unknown
RGVC418	Unknown
RGVC419	Lysogenic	Signal
RGVC420	Lysogenic	Signal
RGVC421	Lysogenic	Signal
RGVC422	Lysogenic	Provirus
RGVC423	Lysogenic	Signal
RGVC424	Lysogenic	Signal
RGVC425	Unknown
RGVC426	Unknown
RGVC427	Lysogenic	Signal
RGVC428	Lysogenic	Signal
RGVC429	Lysogenic	Signal
RGVC430	Lysogenic	Signal
RGVC431	Lysogenic	Signal/Provirus
RGVC432	Lysogenic	Signal/Provirus
RGVC433	Unknown
RGVC434	Unknown
RGVC435	Lysogenic	Signal
RGVC436	Lysogenic	Signal
RGVC437	Unknown
RGVC438	Unknown
RGVC439	Lysogenic	Signal
RGVC440	Unknown
RGVC441	Lysogenic	Signal
RGVC442	Lysogenic	Signal
RGVC443	Lysogenic	Signal
RGVC444	Unknown
RGVC445	Unknown
RGVC446	Unknown
RGVC447	Lysogenic	Signal
RGVC448	Lysogenic	Signal/Provirus
RGVC449	Lysogenic	Signal/Provirus
RGVC450	Lysogenic	Signal
RGVC451	Lysogenic	Signal
RGVC452	Lysogenic	Signal/Provirus
RGVC453	Lysogenic	Signal
RGVC454	Lysogenic	Signal/Provirus
RGVC455	Lysogenic	Signal
RGVC456	Lysogenic	Signal
RGVC457	Unknown
RGVC458	Lysogenic	Provirus
RGVC459	Lysogenic	Signal/Provirus
RGVC460	Lysogenic	Signal
RGVC461	Unknown
RGVC462	Lysogenic	Signal/Provirus
RGVC463	Lysogenic	Signal
RGVC464	Lysogenic	Signal
RGVC465	Lysogenic	Signal
RGVC466	Lysogenic	Signal
RGVC467	Lysogenic	Signal
RGVC468	Lysogenic	Signal
RGVC469	Lysogenic	Signal
RGVC470	Lysogenic	Signal
RGVC471	Unknown
RGVC472	Unknown
RGVC473	Unknown
RGVC474	Unknown
RGVC475	Unknown
RGVC476	Lysogenic	Signal/Provirus
RGVC477	Lysogenic	Signal
RGVC478	Lysogenic	Signal
RGVC479	Lysogenic	Signal
RGVC480	Lysogenic	Signal
RGVC481	Unknown
RGVC482	Unknown
RGVC483	Lysogenic	Signal
RGVC484	Lysogenic	Signal/Provirus
RGVC485	Unknown
RGVC486	Lysogenic	Signal
RGVC487	Unknown
RGVC488	Unknown
RGVC489	Unknown
RGVC490	Unknown
RGVC491	Lysogenic	Signal
RGVC492	Unknown
RGVC493	Unknown
RGVC494	Lysogenic	Signal
RGVC495	Unknown
RGVC496	Lysogenic	Signal/Provirus
RGVC497	Lysogenic	Signal
RGVC498	Lysogenic	Signal
RGVC499	Unknown
RGVC500	Lysogenic	Provirus
RGVC501	Lysogenic	Signal
RGVC502	Unknown
RGVC503	Lysogenic	Signal/Provirus
RGVC504	Lysogenic	Signal
RGVC505	Unknown
RGVC506	Lysogenic	Signal
RGVC507	Unknown
RGVC508	Lysogenic	Signal/Provirus
RGVC509	Unknown
RGVC510	Lysogenic	Signal/Provirus
RGVC511	Lysogenic	Signal
RGVC512	Unknown
RGVC513	Lysogenic	Signal
RGVC514	Lysogenic	Signal
RGVC515	Unknown
RGVC516	Lysogenic	Signal
RGVC517	Unknown
RGVC518	Unknown
RGVC519	Unknown
RGVC520	Unknown
RGVC521	Lysogenic	Signal
RGVC522	Unknown
RGVC523	Unknown
RGVC524	Lysogenic	Signal
RGVC525	Lysogenic	Signal
RGVC526	Lysogenic	Signal
RGVC527	Unknown
RGVC528	Lysogenic	Signal/Provirus
RGVC529	Lysogenic	Signal
RGVC530	Lysogenic	Signal
RGVC531	Lysogenic	Signal/Provirus
RGVC532	Unknown
RGVC533	Lysogenic	Signal
RGVC534	Lysogenic	Signal/Provirus
RGVC535	Lysogenic	Signal
RGVC536	Unknown
RGVC537	Lysogenic	Signal/Provirus
RGVC538	Unknown
RGVC539	Lysogenic	Signal
RGVC540	Lysogenic	Provirus
RGVC541	Unknown
RGVC542	Lysogenic	Signal/Provirus
RGVC543	Lysogenic	Provirus
RGVC544	Unknown
RGVC545	Lysogenic	Provirus
RGVC546	Lysogenic	Signal
RGVC547	Lysogenic	Signal
RGVC548	Lysogenic	Signal/Provirus
RGVC549	Unknown
RGVC550	Lysogenic	Signal
RGVC551	Lysogenic	Signal/Provirus
RGVC552	Lysogenic	Signal
RGVC553	Unknown
RGVC554	Lysogenic	Signal
RGVC555	Lysogenic	Signal/Provirus
RGVC556	Lysogenic	Signal
RGVC557	Lysogenic	Signal
RGVC558	Lysogenic	Signal/Provirus
RGVC559	Lysogenic	Signal/Provirus
RGVC560	Unknown
RGVC561	Lysogenic	Signal
RGVC562	Unknown
RGVC563	Unknown
RGVC564	Lysogenic	Signal
RGVC565	Unknown
RGVC566	Unknown
RGVC567	Lysogenic	Signal
RGVC568	Lysogenic	Signal
RGVC569	Lysogenic	Signal
RGVC570	Lysogenic	Signal
RGVC571	Lysogenic	Signal
RGVC572	Unknown
RGVC573	Unknown
RGVC574	Lysogenic	Signal
RGVC575	Lysogenic	Signal
RGVC576	Unknown
RGVC577	Lysogenic	Provirus
RGVC578	Lysogenic	Signal/Provirus
RGVC579	Unknown
RGVC580	Lysogenic	Signal
RGVC581	Lysogenic	Signal
RGVC582	Lysogenic	Signal
RGVC583	Unknown
RGVC584	Lysogenic	Signal
RGVC585	Unknown
RGVC586	Unknown
RGVC587	Lysogenic	Signal
RGVC588	Lysogenic	Signal
RGVC589	Unknown
RGVC590	Unknown
RGVC591	Lysogenic	Signal/Provirus
RGVC592	Unknown
RGVC593	Unknown
RGVC594	Unknown
RGVC595	Lysogenic	Signal
RGVC596	Lysogenic	Signal/Provirus
RGVC597	Unknown
RGVC598	Unknown
RGVC599	Unknown
RGVC600	Unknown
RGVC601	Unknown
RGVC602	Unknown
RGVC603	Lysogenic	Signal
RGVC604	Lysogenic	Signal
RGVC605	Lysogenic	Signal
RGVC606	Unknown
RGVC607	Lysogenic	Signal/Provirus
RGVC608	Lysogenic	Signal
RGVC609	Unknown
RGVC610	Unknown
RGVC611	Lysogenic	Signal/Provirus
RGVC612	Unknown
RGVC613	Unknown
RGVC614	Lysogenic	Signal
RGVC615	Unknown
RGVC616	Unknown
RGVC617	Lysogenic	Provirus
RGVC618	Lysogenic	Signal
RGVC619	Lytic
RGVC620	Unknown
RGVC621	Unknown
RGVC622	Lysogenic	Signal
RGVC623	Unknown
RGVC624	Unknown
RGVC625	Unknown
RGVC626	Lysogenic	Signal
RGVC627	Lysogenic	Provirus
RGVC628	Lysogenic	Signal
RGVC629	Unknown
RGVC630	Lysogenic	Signal
RGVC631	Unknown
RGVC632	Lysogenic	Signal
RGVC633	Lysogenic	Signal
RGVC634	Lysogenic	Signal
RGVC635	Lysogenic	Signal
RGVC636	Lysogenic	Signal
RGVC637	Unknown
RGVC638	Unknown
RGVC639	Unknown
RGVC640	Lysogenic	Signal
RGVC641	Lysogenic	Signal
RGVC642	Lysogenic	Signal
RGVC643	Lysogenic	Signal/Provirus
RGVC644	Unknown
RGVC645	Lysogenic	Provirus
RGVC646	Lysogenic	Signal
RGVC647	Unknown
RGVC648	Lysogenic	Signal/Provirus
RGVC649	Lysogenic	Signal
RGVC650	Lysogenic	Provirus
RGVC651	Unknown
RGVC652	Lysogenic	Signal
RGVC653	Lysogenic	Signal
RGVC654	Lysogenic	Signal
RGVC655	Lysogenic	Signal
RGVC656	Lysogenic	Signal
RGVC657	Unknown
RGVC658	Unknown
RGVC659	Lysogenic	Signal/Provirus
RGVC660	Lysogenic	Signal
RGVC661	Lysogenic	Signal
RGVC662	Lysogenic	Signal/Provirus
RGVC663	Unknown
RGVC664	Lysogenic	Signal
RGVC665	Unknown
RGVC666	Lysogenic	Signal/Provirus
RGVC667	Lysogenic	Signal
RGVC668	Lysogenic	Signal/Provirus
RGVC669	Lysogenic	Signal
RGVC670	Lysogenic	Signal
RGVC671	Lysogenic	Signal
RGVC672	Lysogenic	Signal/Provirus
RGVC673	Lysogenic	Signal/Provirus
RGVC674	Lysogenic	Signal
RGVC675	Lysogenic	Signal/Provirus
RGVC676	Unknown
RGVC677	Unknown
RGVC678	Unknown
RGVC679	Lysogenic	Signal
RGVC680	Lysogenic	Signal/Provirus
RGVC681	Lysogenic	Signal/Provirus
RGVC682	Lysogenic	Signal
RGVC683	Lysogenic	Signal
RGVC684	Lysogenic	Signal
RGVC685	Lysogenic	Signal
RGVC686	Lysogenic	Signal/Provirus
RGVC687	Lysogenic	Signal
RGVC688	Lysogenic	Signal
RGVC689	Unknown
RGVC690	Lysogenic	Signal/Provirus
RGVC691	Unknown
RGVC692	Lysogenic	Signal
RGVC693	Unknown
RGVC694	Lysogenic	Signal
RGVC695	Unknown
RGVC696	Lysogenic	Signal
RGVC697	Lysogenic	Signal/Provirus
RGVC698	Unknown
RGVC699	Lysogenic	Signal/Provirus
RGVC700	Unknown
RGVC701	Lysogenic	Signal/Provirus
RGVC702	Lysogenic	Signal/Provirus
RGVC703	Lysogenic	Signal
RGVC704	Lysogenic	Signal
RGVC705	Unknown
RGVC706	Unknown
RGVC707	Lysogenic	Provirus
RGVC708	Lysogenic	Signal
RGVC709	Unknown
RGVC710	Unknown
RGVC711	Unknown
RGVC712	Unknown
RGVC713	Lysogenic	Signal/Provirus
RGVC714	Lysogenic	Signal
RGVC715	Unknown
RGVC716	Lysogenic	Signal
RGVC717	Lysogenic	Signal/Provirus
RGVC718	Lysogenic	Signal
RGVC719	Lysogenic	Signal
RGVC720	Lysogenic	Signal/Provirus
RGVC721	Unknown
RGVC722	Unknown
RGVC723	Lysogenic	Signal/Provirus
RGVC724	Lysogenic	Signal
RGVC725	Lysogenic	Signal
RGVC726	Unknown
RGVC727	Lysogenic	Signal
RGVC728	Lysogenic	Signal/Provirus
RGVC729	Lysogenic	Signal
RGVC730	Unknown
RGVC731	Unknown
RGVC732	Lysogenic	Signal
RGVC733	Unknown
RGVC734	Unknown
RGVC735	Unknown
RGVC736	Lysogenic	Signal
RGVC737	Lysogenic	Provirus
RGVC738	Unknown
RGVC739	Unknown
RGVC740	Lysogenic	Signal
RGVC741	Unknown
RGVC742	Lysogenic	Signal
RGVC743	Unknown
RGVC744	Unknown
RGVC745	Unknown
RGVC746	Unknown
RGVC747	Unknown
RGVC748	Unknown
RGVC749	Lysogenic	Signal/Provirus
RGVC750	Lysogenic	Signal
RGVC751	Lysogenic	Signal
RGVC752	Lysogenic	Signal
RGVC753	Lysogenic	Signal
RGVC754	Unknown
RGVC755	Lysogenic	Signal/Provirus
RGVC756	Lysogenic	Signal
RGVC757	Lysogenic	Provirus
RGVC758	Lysogenic	Signal
RGVC759	Lysogenic	Signal
RGVC760	Unknown
RGVC761	Lysogenic	Signal
RGVC762	Lysogenic	Signal/Provirus
RGVC763	Lysogenic	Signal
RGVC764	Unknown
RGVC765	Lysogenic	Signal
RGVC766	Lysogenic	Signal/Provirus
RGVC767	Unknown
RGVC768	Unknown
RGVC769	Unknown
RGVC770	Unknown
RGVC771	Lysogenic	Signal
RGVC772	Unknown
RGVC773	Lysogenic	Provirus
RGVC774	Unknown
RGVC775	Unknown
RGVC776	Lysogenic	Signal/Provirus
RGVC777	Lysogenic	Provirus
RGVC778	Unknown
RGVC779	Lysogenic	Signal/Provirus
RGVC780	Lysogenic	Signal
RGVC781	Unknown
RGVC782	Lysogenic	Signal/Provirus
RGVC783	Lysogenic	Provirus
RGVC784	Lysogenic	Signal
RGVC785	Lysogenic	Provirus
RGVC786	Lysogenic	Signal
RGVC787	Lysogenic	Signal
RGVC788	Lysogenic	Signal
RGVC789	Lysogenic	Signal
RGVC790	Lysogenic	Signal
RGVC791	Lysogenic	Signal/Provirus
RGVC792	Unknown
RGVC793	Lysogenic	Signal/Provirus
RGVC794	Unknown
RGVC795	Lysogenic	Signal
RGVC796	Lysogenic	Signal/Provirus
RGVC797	Unknown
RGVC798	Lysogenic	Signal
RGVC799	Unknown
RGVC800	Unknown
RGVC801	Lysogenic	Signal
RGVC802	Unknown
RGVC803	Unknown
RGVC804	Unknown
RGVC805	Unknown
RGVC806	Lysogenic	Signal
RGVC807	Lysogenic	Signal/Provirus
RGVC808	Lysogenic	Signal
RGVC809	Unknown
RGVC810	Lysogenic	Signal
RGVC811	Unknown
RGVC812	Lysogenic	Signal/Provirus
RGVC813	Unknown
RGVC814	Lysogenic	Signal
RGVC815	Unknown
RGVC816	Unknown
RGVC817	Lysogenic	Signal
RGVC818	Lysogenic	Signal/Provirus
RGVC819	Unknown
RGVC820	Unknown
RGVC821	Unknown
RGVC822	Lysogenic	Signal/Provirus
RGVC823	Lysogenic	Signal
RGVC824	Unknown
RGVC825	Lysogenic	Signal
RGVC826	Unknown
RGVC827	Lysogenic	Signal
RGVC828	Lysogenic	Signal
RGVC829	Unknown
RGVC830	Lysogenic	Signal
RGVC831	Unknown
RGVC832	Lysogenic	Signal
RGVC833	Unknown
RGVC834	Unknown
RGVC835	Lysogenic	Provirus
RGVC836	Lysogenic	Signal
RGVC837	Lysogenic	Signal
RGVC838	Lysogenic	Signal
RGVC839	Lysogenic	Signal
RGVC840	Unknown
RGVC841	Lysogenic	Signal/Provirus
RGVC842	Lysogenic	Signal
RGVC843	Lysogenic	Signal/Provirus
RGVC844	Lysogenic	Signal
RGVC845	Lysogenic	Signal/Provirus
RGVC846	Lysogenic	Signal/Provirus
RGVC847	Lysogenic	Signal
RGVC848	Unknown
RGVC849	Unknown
RGVC850	Unknown
RGVC851	Lysogenic	Signal/Provirus
RGVC852	Unknown
RGVC853	Unknown
RGVC854	Lysogenic	Signal
RGVC855	Unknown
RGVC856	Unknown
RGVC857	Unknown
RGVC858	Lysogenic	Signal
RGVC859	Unknown
RGVC860	Unknown
RGVC861	Lysogenic	Signal/Provirus
RGVC862	Lysogenic	Signal
RGVC863	Lysogenic	Signal
RGVC864	Unknown
RGVC865	Lysogenic	Provirus
RGVC866	Lysogenic	Signal/Provirus
RGVC867	Unknown
RGVC868	Unknown
RGVC869	Lysogenic	Signal/Provirus
RGVC870	Unknown
RGVC871	Lysogenic	Signal
RGVC872	Unknown
RGVC873	Lysogenic	Signal
RGVC874	Lysogenic	Signal
RGVC875	Unknown
RGVC876	Lysogenic	Signal
RGVC877	Unknown
RGVC878	Lysogenic	Signal
RGVC879	Unknown
RGVC880	Lysogenic	Signal
RGVC881	Unknown
RGVC882	Lysogenic	Signal/Provirus
RGVC883	Unknown
RGVC884	Unknown
RGVC885	Lysogenic	Signal
RGVC886	Lysogenic	Signal/Provirus
RGVC887	Unknown
RGVC888	Lysogenic	Signal
RGVC889	Unknown
RGVC890	Unknown
RGVC891	Lysogenic	Signal/Provirus
RGVC892	Unknown
RGVC893	Lysogenic	Signal
RGVC894	Unknown
RGVC895	Unknown
RGVC896	Lysogenic	Signal
RGVC897	Unknown
RGVC898	Lysogenic	Signal/Provirus
RGVC899	Lysogenic	Provirus
RGVC900	Unknown
RGVC901	Lysogenic	Signal
RGVC902	Lysogenic	Signal
RGVC903	Lysogenic	Signal
RGVC904	Unknown
RGVC905	Lysogenic	Signal/Provirus
RGVC906	Lysogenic	Provirus
RGVC907	Unknown
RGVC908	Lysogenic	Signal
RGVC909	Lysogenic	Signal
RGVC910	Unknown
RGVC911	Lysogenic	Signal
RGVC912	Lysogenic	Signal
RGVC913	Lysogenic	Signal
RGVC914	Lysogenic	Signal
RGVC915	Lysogenic	Signal/Provirus
RGVC916	Unknown
RGVC917	Lysogenic	Signal
RGVC918	Unknown
RGVC919	Lysogenic	Signal
RGVC920	Lysogenic	Signal/Provirus
RGVC921	Unknown
RGVC922	Unknown
RGVC923	Lysogenic	Signal
RGVC924	Unknown
RGVC925	Unknown
RGVC926	Lysogenic	Signal
RGVC927	Lysogenic	Signal/Provirus
RGVC928	Lysogenic	Signal/Provirus
RGVC929	Lysogenic	Signal
RGVC930	Lysogenic	Signal
RGVC931	Lysogenic	Signal
RGVC932	Unknown
RGVC933	Lysogenic	Signal/Provirus
RGVC934	Lysogenic	Signal/Provirus
RGVC935	Unknown
RGVC936	Lysogenic	Signal
RGVC937	Lysogenic	Signal
RGVC938	Lysogenic	Signal
RGVC939	Lysogenic	Signal
RGVC940	Lysogenic	Signal
RGVC941	Lysogenic	Signal
RGVC942	Lysogenic	Signal/Provirus
RGVC943	Unknown
RGVC944	Unknown
RGVC945	Unknown
RGVC946	Unknown
RGVC947	Unknown
RGVC948	Lysogenic	Signal/Provirus
RGVC949	Unknown
RGVC950	Unknown
RGVC951	Lysogenic	Signal
RGVC952	Unknown
RGVC953	Unknown
RGVC954	Lysogenic	Provirus
RGVC955	Lysogenic	Signal/Provirus
RGVC956	Lysogenic	Signal
RGVC957	Unknown
RGVC958	Unknown
RGVC959	Lysogenic	Signal/Provirus
RGVC960	Lysogenic	Signal
RGVC961	Lysogenic	Signal/Provirus
RGVC962	Lysogenic	Signal/Provirus
RGVC963	Unknown
RGVC964	Lysogenic	Signal
RGVC965	Unknown
RGVC966	Unknown
RGVC967	Lysogenic	Signal
RGVC968	Lysogenic	Signal
RGVC969	Lysogenic	Signal
RGVC970	Lysogenic	Signal
RGVC971	Unknown
RGVC972	Lysogenic	Provirus
RGVC973	Unknown
RGVC974	Lysogenic	Signal
RGVC975	Unknown
RGVC976	Lysogenic	Signal
RGVC977	Lysogenic	Signal
RGVC978	Unknown
RGVC979	Lysogenic	Signal
RGVC980	Unknown
RGVC981	Unknown
RGVC982	Lysogenic	Signal
RGVC983	Lysogenic	Signal
RGVC984	Lysogenic	Signal/Provirus
RGVC985	Unknown
RGVC986	Lysogenic	Signal
RGVC987	Lysogenic	Signal
RGVC988	Lysogenic	Provirus
RGVC989	Lysogenic	Signal
RGVC990	Lysogenic	Signal/Provirus
RGVC991	Lysogenic	Signal
RGVC992	Lysogenic	Signal
RGVC993	Lysogenic	Signal/Provirus
RGVC994	Unknown
RGVC995	Lysogenic	Signal
RGVC996	Lysogenic	Signal/Provirus
RGVC997	Lysogenic	Signal
RGVC998	Lysogenic	Provirus
RGVC999	Lysogenic	Signal
RGVC1000	Lysogenic	Signal
RGVC1001	Unknown
RGVC1002	Lysogenic	Provirus
RGVC1003	Unknown
RGVC1004	Lysogenic	Signal
RGVC1005	Unknown
RGVC1006	Lysogenic	Signal
RGVC1007	Lysogenic	Provirus
RGVC1008	Lysogenic	Provirus
RGVC1009	Lysogenic	Signal/Provirus
RGVC1010	Unknown
RGVC1011	Lysogenic	Signal
RGVC1012	Lysogenic	Signal
RGVC1013	Lysogenic	Signal
RGVC1014	Lysogenic	Signal
RGVC1015	Lysogenic	Signal/Provirus
RGVC1016	Unknown
RGVC1017	Unknown
RGVC1018	Lysogenic	Signal
RGVC1019	Unknown
RGVC1020	Lysogenic	Signal
RGVC1021	Lysogenic	Provirus
RGVC1022	Lysogenic	Provirus
RGVC1023	Lysogenic	Signal
RGVC1024	Lysogenic	Signal
RGVC1025	Lysogenic	Provirus
RGVC1026	Lysogenic	Signal/Provirus
RGVC1027	Lysogenic	Provirus
RGVC1028	Lysogenic	Signal
RGVC1029	Unknown
RGVC1030	Unknown
RGVC1031	Unknown
RGVC1032	Lysogenic	Signal
RGVC1033	Lysogenic	Signal
RGVC1034	Lysogenic	Signal
RGVC1035	Lysogenic	Signal
RGVC1036	Lysogenic	Signal/Provirus
RGVC1037	Lysogenic	Signal
RGVC1038	Unknown
RGVC1039	Lysogenic	Signal
RGVC1040	Unknown
RGVC1041	Lysogenic	Signal/Provirus
RGVC1042	Unknown
RGVC1043	Lysogenic	Provirus
RGVC1044	Unknown
RGVC1045	Lysogenic	Signal
RGVC1046	Lysogenic	Signal
RGVC1047	Lysogenic	Signal
RGVC1048	Lysogenic	Signal
RGVC1049	Unknown
RGVC1050	Lysogenic	Signal/Provirus
RGVC1051	Lysogenic	Signal
RGVC1052	Unknown
RGVC1053	Unknown
RGVC1054	Lysogenic	Signal
RGVC1055	Lysogenic	Signal
RGVC1056	Unknown
RGVC1057	Lysogenic	Signal
RGVC1058	Lysogenic	Signal/Provirus
RGVC1059	Lysogenic	Signal
RGVC1060	Unknown
RGVC1061	Lysogenic	Signal
RGVC1062	Lysogenic	Signal
RGVC1063	Lysogenic	Signal
RGVC1064	Unknown
RGVC1065	Unknown
RGVC1066	Lysogenic	Signal
RGVC1067	Lysogenic	Provirus
RGVC1068	Lysogenic	Signal
RGVC1069	Lysogenic	Signal
RGVC1070	Unknown
RGVC1071	Lysogenic	Provirus
RGVC1072	Unknown
RGVC1073	Unknown
RGVC1074	Unknown
RGVC1075	Unknown
RGVC1076	Unknown
RGVC1077	Lysogenic	Signal/Provirus
RGVC1078	Unknown
RGVC1079	Lysogenic	Signal
RGVC1080	Unknown
RGVC1081	Lysogenic	Signal
RGVC1082	Unknown
RGVC1083	Unknown
RGVC1084	Unknown
RGVC1085	Unknown
RGVC1086	Lysogenic	Signal
RGVC1087	Lysogenic	Signal
RGVC1088	Lysogenic	Signal/Provirus
RGVC1089	Unknown
RGVC1090	Unknown
RGVC1091	Lysogenic	Signal
RGVC1092	Lysogenic	Signal/Provirus
RGVC1093	Lysogenic	Signal
RGVC1094	Lysogenic	Signal
RGVC1095	Lysogenic	Signal
RGVC1096	Lysogenic	Signal
RGVC1097	Lysogenic	Signal
RGVC1098	Lysogenic	Signal
RGVC1099	Lysogenic	Signal
RGVC1100	Lysogenic	Provirus
RGVC1101	Lysogenic	Signal
RGVC1102	Lysogenic	Signal
RGVC1103	Lysogenic	Signal
RGVC1104	Lysogenic	Provirus
RGVC1105	Unknown
RGVC1106	Unknown
RGVC1107	Lysogenic	Signal/Provirus
RGVC1108	Unknown
RGVC1109	Unknown
RGVC1110	Lysogenic	Signal
RGVC1111	Unknown
RGVC1112	Lysogenic	Signal
RGVC1113	Unknown
RGVC1114	Unknown
RGVC1115	Lysogenic	Signal
RGVC1116	Unknown
RGVC1117	Lysogenic	Signal
RGVC1118	Unknown
RGVC1119	Lysogenic	Signal/Provirus
RGVC1120	Lysogenic	Signal
RGVC1121	Lysogenic	Signal
RGVC1122	Unknown
RGVC1123	Lysogenic	Signal
RGVC1124	Lysogenic	Signal
RGVC1125	Lysogenic	Signal/Provirus
RGVC1126	Lysogenic	Signal
RGVC1127	Unknown
RGVC1128	Lysogenic	Signal
RGVC1129	Lysogenic	Signal
RGVC1130	Unknown
RGVC1131	Lysogenic	Signal
RGVC1132	Unknown
RGVC1133	Lysogenic	Signal/Provirus
RGVC1134	Lysogenic	Signal
RGVC1135	Lysogenic	Signal/Provirus
RGVC1136	Lysogenic	Signal
RGVC1137	Lysogenic	Signal/Provirus
RGVC1138	Unknown
RGVC1139	Lysogenic	Signal
RGVC1140	Lysogenic	Signal
RGVC1141	Lysogenic	Signal/Provirus
RGVC1142	Lysogenic	Signal
RGVC1143	Unknown
RGVC1144	Lysogenic	Signal
RGVC1145	Lysogenic	Signal/Provirus
RGVC1146	Lysogenic	Signal
RGVC1147	Unknown
RGVC1148	Lysogenic	Signal
RGVC1149	Unknown
RGVC1150	Lysogenic	Signal/Provirus
RGVC1151	Lysogenic	Signal
RGVC1152	Lysogenic	Signal/Provirus
RGVC1153	Lysogenic	Signal
RGVC1154	Unknown
RGVC1155	Unknown
RGVC1156	Lysogenic	Signal
RGVC1157	Lysogenic	Signal
RGVC1158	Lysogenic	Signal
RGVC1159	Lysogenic	Signal
RGVC1160	Lysogenic	Signal
RGVC1161	Unknown
RGVC1162	Unknown
RGVC1163	Lysogenic	Signal/Provirus
RGVC1164	Lysogenic	Signal
RGVC1165	Lysogenic	Signal
RGVC1166	Unknown
RGVC1167	Lysogenic	Signal
RGVC1168	Unknown
RGVC1169	Unknown
RGVC1170	Lysogenic	Signal
RGVC1171	Unknown
RGVC1172	Lysogenic	Signal
RGVC1173	Lysogenic	Signal
RGVC1174	Lysogenic	Signal
RGVC1175	Unknown
RGVC1176	Lysogenic	Signal
RGVC1177	Lysogenic	Signal
RGVC1178	Unknown
RGVC1179	Unknown
RGVC1180	Unknown
RGVC1181	Unknown
RGVC1182	Lysogenic	Signal
RGVC1183	Lysogenic	Provirus
RGVC1184	Lysogenic	Signal
RGVC1185	Unknown
RGVC1186	Lysogenic	Signal/Provirus
RGVC1187	Lysogenic	Signal
RGVC1188	Unknown
RGVC1189	Unknown
RGVC1190	Unknown
RGVC1191	Unknown
RGVC1192	Lysogenic	Provirus
RGVC1193	Unknown
RGVC1194	Lysogenic	Signal
RGVC1195	Lysogenic	Signal
RGVC1196	Lysogenic	Signal/Provirus
RGVC1197	Lysogenic	Signal/Provirus
RGVC1198	Lysogenic	Signal
RGVC1199	Lysogenic	Signal/Provirus
RGVC1200	Lysogenic	Signal/Provirus
RGVC1201	Unknown
RGVC1202	Lysogenic	Signal
RGVC1203	Lysogenic	Signal
RGVC1204	Unknown
RGVC1205	Lysogenic	Signal
RGVC1206	Unknown
RGVC1207	Lysogenic	Signal
RGVC1208	Lysogenic	Provirus
RGVC1209	Lysogenic	Signal
RGVC1210	Unknown
RGVC1211	Lysogenic	Signal
RGVC1212	Lysogenic	Signal
RGVC1213	Lysogenic	Signal
RGVC1214	Unknown
RGVC1215	Unknown
RGVC1216	Unknown
RGVC1217	Lysogenic	Signal
RGVC1218	Lysogenic	Provirus
RGVC1219	Unknown
RGVC1220	Unknown
RGVC1221	Lysogenic	Signal
RGVC1222	Lysogenic	Signal
RGVC1223	Lysogenic	Signal
RGVC1224	Lysogenic	Signal
RGVC1225	Unknown
RGVC1226	Lysogenic	Signal
RGVC1227	Lysogenic	Signal
RGVC1228	Unknown
RGVC1229	Unknown
RGVC1230	Unknown
RGVC1231	Lysogenic	Signal
RGVC1232	Lysogenic	Provirus
RGVC1233	Lysogenic	Signal/Provirus
RGVC1234	Lysogenic	Signal
RGVC1235	Lysogenic	Signal
RGVC1236	Lysogenic	Signal/Provirus
RGVC1237	Lysogenic	Signal
RGVC1238	Lysogenic	Signal
RGVC1239	Unknown
RGVC1240	Unknown
RGVC1241	Lysogenic	Signal
RGVC1242	Lysogenic	Provirus
RGVC1243	Unknown
RGVC1244	Lysogenic	Signal
RGVC1245	Lysogenic	Signal
RGVC1246	Unknown
RGVC1247	Unknown
RGVC1248	Unknown
RGVC1249	Lysogenic	Signal
RGVC1250	Lysogenic	Signal
RGVC1251	Unknown
RGVC1252	Unknown
RGVC1253	Unknown
RGVC1254	Lysogenic	Signal
RGVC1255	Lysogenic	Provirus
RGVC1256	Lysogenic	Signal
RGVC1257	Unknown
RGVC1258	Lysogenic	Signal/Provirus
RGVC1259	Lysogenic	Signal/Provirus
RGVC1260	Lysogenic	Signal
RGVC1261	Lysogenic	Signal/Provirus
RGVC1262	Lysogenic	Signal
RGVC1263	Lysogenic	Signal
RGVC1264	Lysogenic	Signal
RGVC1265	Unknown
RGVC1266	Lysogenic	Provirus
RGVC1267	Unknown
RGVC1268	Unknown
RGVC1269	Unknown
RGVC1270	Lysogenic	Signal/Provirus
RGVC1271	Lysogenic	Signal
RGVC1272	Unknown
RGVC1273	Lytic
RGVC1274	Unknown
RGVC1275	Unknown
RGVC1276	Lysogenic	Signal
RGVC1277	Lysogenic	Signal/Provirus
RGVC1278	Lysogenic	Signal
RGVC1279	Lysogenic	Signal/Provirus
RGVC1280	Unknown
RGVC1281	Lysogenic	Signal
RGVC1282	Lysogenic	Signal
RGVC1283	Unknown
RGVC1284	Lysogenic	Signal
RGVC1285	Lysogenic	Signal/Provirus
RGVC1286	Unknown
RGVC1287	Unknown
RGVC1288	Lysogenic	Signal/Provirus
RGVC1289	Lysogenic	Signal
RGVC1290	Unknown
RGVC1291	Lysogenic	Signal
RGVC1292	Lysogenic	Signal
RGVC1293	Unknown
RGVC1294	Lysogenic	Signal/Provirus
RGVC1295	Unknown
RGVC1296	Lysogenic	Signal
RGVC1297	Lysogenic	Signal
RGVC1298	Unknown
RGVC1299	Lytic
RGVC1300	Unknown
RGVC1301	Unknown
RGVC1302	Lysogenic	Signal/Provirus
RGVC1303	Lysogenic	Signal
RGVC1304	Lysogenic	Signal
RGVC1305	Unknown
RGVC1306	Lysogenic	Signal
RGVC1307	Unknown
RGVC1308	Lysogenic	Signal
RGVC1309	Lysogenic	Signal
RGVC1310	Lytic
RGVC1311	Lysogenic	Signal
RGVC1312	Unknown
RGVC1313	Lysogenic	Signal
RGVC1314	Lysogenic	Signal/Provirus
RGVC1315	Unknown
RGVC1316	Lysogenic	Signal
RGVC1317	Lysogenic	Provirus
RGVC1318	Unknown
RGVC1319	Unknown
RGVC1320	Lysogenic	Signal/Provirus
RGVC1321	Unknown
RGVC1322	Lysogenic	Signal
RGVC1323	Unknown
RGVC1324	Lysogenic	Provirus
RGVC1325	Lysogenic	Signal
RGVC1326	Lysogenic	Signal
RGVC1327	Lysogenic	Signal
RGVC1328	Lysogenic	Signal
RGVC1329	Lysogenic	Signal
RGVC1330	Unknown
RGVC1331	Lysogenic	Signal
RGVC1332	Unknown
RGVC1333	Unknown
RGVC1334	Lysogenic	Signal
RGVC1335	Unknown
RGVC1336	Lysogenic	Provirus
RGVC1337	Lysogenic	Signal
RGVC1338	Unknown
RGVC1339	Unknown
RGVC1340	Lysogenic	Signal
RGVC1341	Lysogenic	Signal
RGVC1342	Lysogenic	Signal/Provirus
RGVC1343	Lysogenic	Signal
RGVC1344	Lysogenic	Signal
RGVC1345	Unknown
RGVC1346	Unknown
RGVC1347	Lysogenic	Signal
RGVC1348	Unknown
RGVC1349	Lysogenic	Signal
RGVC1350	Lysogenic	Signal
RGVC1351	Unknown
RGVC1352	Lysogenic	Provirus
RGVC1353	Lysogenic	Provirus
RGVC1354	Unknown
RGVC1355	Unknown
RGVC1356	Unknown
RGVC1357	Unknown
RGVC1358	Unknown
RGVC1359	Lysogenic	Signal/Provirus
RGVC1360	Lysogenic	Signal/Provirus
RGVC1361	Unknown
RGVC1362	Lysogenic	Signal
RGVC1363	Lysogenic	Signal
RGVC1364	Lysogenic	Signal/Provirus
RGVC1365	Lysogenic	Signal
RGVC1366	Unknown
RGVC1367	Unknown
RGVC1368	Lysogenic	Signal/Provirus
RGVC1369	Lysogenic	Signal/Provirus
RGVC1370	Lysogenic	Signal
RGVC1371	Lysogenic	Signal
RGVC1372	Lysogenic	Signal
RGVC1373	Lysogenic	Signal
RGVC1374	Unknown
RGVC1375	Unknown
RGVC1376	Unknown
RGVC1377	Lysogenic	Signal
RGVC1378	Lysogenic	Signal
RGVC1379	Lysogenic	Provirus
RGVC1380	Unknown
RGVC1381	Lysogenic	Signal
RGVC1382	Lysogenic	Signal
RGVC1383	Unknown
RGVC1384	Lysogenic	Signal/Provirus
RGVC1385	Unknown
RGVC1386	Lysogenic	Signal/Provirus
RGVC1387	Lysogenic	Signal
RGVC1388	Lysogenic	Signal
RGVC1389	Lysogenic	Provirus
RGVC1390	Unknown
RGVC1391	Unknown
RGVC1392	Lysogenic	Signal
RGVC1393	Lysogenic	Provirus
RGVC1394	Lysogenic	Signal/Provirus
RGVC1395	Lysogenic	Signal
RGVC1396	Unknown
RGVC1397	Lysogenic	Signal
RGVC1398	Lysogenic	Signal
RGVC1399	Unknown
RGVC1400	Lysogenic	Provirus
RGVC1401	Unknown
RGVC1402	Unknown
RGVC1403	Unknown
RGVC1404	Unknown
RGVC1405	Lysogenic	Signal
RGVC1406	Lysogenic	Signal
RGVC1407	Lysogenic	Signal/Provirus
RGVC1408	Lysogenic	Signal
RGVC1409	Unknown
RGVC1410	Lysogenic	Signal
RGVC1411	Lysogenic	Signal
RGVC1412	Unknown
RGVC1413	Lysogenic	Signal/Provirus
RGVC1414	Unknown
RGVC1415	Lysogenic	Signal
RGVC1416	Unknown
RGVC1417	Unknown
RGVC1418	Lysogenic	Provirus
RGVC1419	Lysogenic	Signal
RGVC1420	Unknown
RGVC1421	Unknown
RGVC1422	Lysogenic	Signal
RGVC1423	Unknown
RGVC1424	Lysogenic	Signal
RGVC1425	Lysogenic	Signal/Provirus
RGVC1426	Lysogenic	Signal
RGVC1427	Unknown
RGVC1428	Lysogenic	Signal/Provirus
RGVC1429	Lysogenic	Signal/Provirus
RGVC1430	Unknown
RGVC1431	Lysogenic	Signal/Provirus
RGVC1432	Lysogenic	Signal/Provirus
RGVC1433	Lysogenic	Signal/Provirus
RGVC1434	Unknown
RGVC1435	Unknown
RGVC1436	Unknown
RGVC1437	Lysogenic	Signal
RGVC1438	Unknown
RGVC1439	Lysogenic	Signal
RGVC1440	Lysogenic	Signal/Provirus
RGVC1441	Unknown
RGVC1442	Lysogenic	Signal
RGVC1443	Lysogenic	Signal
RGVC1444	Unknown
RGVC1445	Lysogenic	Signal
RGVC1446	Unknown
RGVC1447	Lysogenic	Signal/Provirus
RGVC1448	Lysogenic	Signal/Provirus
RGVC1449	Lysogenic	Provirus
RGVC1450	Unknown
RGVC1451	Lysogenic	Signal
RGVC1452	Unknown
RGVC1453	Unknown
RGVC1454	Unknown
RGVC1455	Unknown
RGVC1456	Lysogenic	Provirus
RGVC1457	Lysogenic	Signal/Provirus
RGVC1458	Unknown
RGVC1459	Lysogenic	Signal
RGVC1460	Unknown
RGVC1461	Lysogenic	Signal/Provirus
RGVC1462	Lysogenic	Signal
RGVC1463	Lysogenic	Provirus
RGVC1464	Unknown
RGVC1465	Lysogenic	Signal/Provirus
RGVC1466	Unknown
RGVC1467	Lysogenic	Signal
RGVC1468	Unknown
RGVC1469	Lysogenic	Signal
RGVC1470	Unknown
RGVC1471	Lysogenic	Signal
RGVC1472	Lysogenic	Signal
RGVC1473	Unknown
RGVC1474	Unknown
RGVC1475	Lysogenic	Signal
RGVC1476	Lysogenic	Provirus
RGVC1477	Lysogenic	Provirus
RGVC1478	Lysogenic	Signal/Provirus
RGVC1479	Unknown
RGVC1480	Unknown
RGVC1481	Lysogenic	Signal
RGVC1482	Lysogenic	Signal
RGVC1483	Lysogenic	Signal
RGVC1484	Lysogenic	Provirus
RGVC1485	Lysogenic	Signal
RGVC1486	Lysogenic	Signal/Provirus
RGVC1487	Lysogenic	Signal
RGVC1488	Lysogenic	Provirus
RGVC1489	Lysogenic	Signal
RGVC1490	Lysogenic	Provirus
RGVC1491	Unknown
RGVC1492	Lysogenic	Provirus
RGVC1493	Unknown
RGVC1494	Unknown
RGVC1495	Unknown
RGVC1496	Unknown
RGVC1497	Unknown
RGVC1498	Lysogenic	Signal/Provirus
RGVC1499	Lysogenic	Signal
RGVC1500	Unknown
RGVC1501	Unknown
RGVC1502	Unknown
RGVC1503	Unknown
RGVC1504	Lysogenic	Signal
RGVC1505	Unknown
RGVC1506	Lysogenic	Signal
RGVC1507	Lysogenic	Signal
RGVC1508	Lysogenic	Signal
RGVC1509	Lysogenic	Signal/Provirus
RGVC1510	Unknown
RGVC1511	Lysogenic	Provirus
RGVC1512	Unknown
RGVC1513	Lysogenic	Signal
RGVC1514	Lysogenic	Signal
RGVC1515	Lysogenic	Signal/Provirus
RGVC1516	Unknown
RGVC1517	Lysogenic	Signal
RGVC1518	Lysogenic	Signal
RGVC1519	Unknown
RGVC1520	Lysogenic	Signal
RGVC1521	Lysogenic	Provirus
RGVC1522	Unknown
RGVC1523	Lysogenic	Signal
RGVC1524	Unknown
RGVC1525	Lysogenic	Signal/Provirus
RGVC1526	Unknown
RGVC1527	Unknown
RGVC1528	Lysogenic	Signal
RGVC1529	Lysogenic	Signal
RGVC1530	Lysogenic	Signal
RGVC1531	Lysogenic	Signal
RGVC1532	Lysogenic	Signal
RGVC1533	Lysogenic	Signal
RGVC1534	Lysogenic	Signal/Provirus
RGVC1535	Unknown
RGVC1536	Lysogenic	Signal
RGVC1537	Lysogenic	Signal
RGVC1538	Unknown
RGVC1539	Lysogenic	Signal
RGVC1540	Lysogenic	Signal
RGVC1541	Unknown
RGVC1542	Lysogenic	Signal
RGVC1543	Unknown
RGVC1544	Unknown
RGVC1545	Lysogenic	Signal/Provirus
RGVC1546	Lysogenic	Signal
RGVC1547	Unknown
RGVC1548	Unknown
RGVC1549	Lysogenic	Signal
RGVC1550	Lysogenic	Signal
RGVC1551	Lysogenic	Signal/Provirus
RGVC1552	Unknown
RGVC1553	Lysogenic	Signal
RGVC1554	Lysogenic	Signal
RGVC1555	Lysogenic	Signal
RGVC1556	Lysogenic	Signal/Provirus
RGVC1557	Unknown
RGVC1558	Lysogenic	Signal
RGVC1559	Lysogenic	Signal
RGVC1560	Lysogenic	Signal
RGVC1561	Lysogenic	Signal/Provirus
RGVC1562	Lysogenic	Provirus
RGVC1563	Lysogenic	Signal
RGVC1564	Lysogenic	Signal
RGVC1565	Lysogenic	Signal
RGVC1566	Lysogenic	Signal
RGVC1567	Lysogenic	Signal/Provirus
RGVC1568	Lysogenic	Signal
RGVC1569	Lysogenic	Signal/Provirus
RGVC1570	Lysogenic	Signal
RGVC1571	Lysogenic	Signal/Provirus
RGVC1572	Lysogenic	Signal
RGVC1573	Unknown
RGVC1574	Lysogenic	Signal/Provirus
RGVC1575	Unknown
RGVC1576	Unknown
RGVC1577	Unknown
RGVC1578	Lysogenic	Signal
RGVC1579	Unknown
RGVC1580	Unknown
RGVC1581	Lysogenic	Signal
RGVC1582	Unknown
RGVC1583	Lysogenic	Signal
RGVC1584	Unknown
RGVC1585	Lysogenic	Signal/Provirus
RGVC1586	Unknown
RGVC1587	Unknown
RGVC1588	Unknown
RGVC1589	Unknown
RGVC1590	Unknown
RGVC1591	Lysogenic	Signal/Provirus
RGVC1592	Unknown
RGVC1593	Unknown
RGVC1594	Lysogenic	Signal
RGVC1595	Unknown
RGVC1596	Lysogenic	Signal
RGVC1597	Lysogenic	Signal
RGVC1598	Lysogenic	Provirus
RGVC1599	Lysogenic	Signal
RGVC1600	Unknown
RGVC1601	Unknown
RGVC1602	Lysogenic	Signal
RGVC1603	Lysogenic	Provirus
RGVC1604	Lysogenic	Signal
RGVC1605	Lysogenic	Signal
RGVC1606	Unknown
RGVC1607	Lysogenic	Signal
RGVC1608	Lysogenic	Signal
RGVC1609	Lysogenic	Signal
RGVC1610	Unknown
RGVC1611	Unknown
RGVC1612	Lysogenic	Signal
RGVC1613	Unknown
RGVC1614	Unknown
RGVC1615	Lysogenic	Signal/Provirus
RGVC1616	Lysogenic	Signal/Provirus
RGVC1617	Unknown
RGVC1618	Lysogenic	Signal
RGVC1619	Unknown
RGVC1620	Lysogenic	Signal
RGVC1621	Lysogenic	Signal
RGVC1622	Lysogenic	Signal
RGVC1623	Unknown
RGVC1624	Lysogenic	Signal
RGVC1625	Lytic
RGVC1626	Lysogenic	Signal
RGVC1627	Lysogenic	Signal
RGVC1628	Lysogenic	Provirus
RGVC1629	Unknown
RGVC1630	Unknown
RGVC1631	Lysogenic	Provirus
RGVC1632	Lysogenic	Signal
RGVC1633	Unknown
RGVC1634	Unknown
RGVC1635	Lysogenic	Signal
RGVC1636	Lysogenic	Signal
RGVC1637	Lysogenic	Signal
RGVC1638	Lysogenic	Signal
RGVC1639	Unknown
RGVC1640	Lysogenic	Provirus
RGVC1641	Unknown
RGVC1642	Lysogenic	Signal
RGVC1643	Lysogenic	Signal
RGVC1644	Unknown
RGVC1645	Lysogenic	Signal
RGVC1646	Lysogenic	Provirus
RGVC1647	Lysogenic	Signal
RGVC1648	Unknown
RGVC1649	Lysogenic	Signal
RGVC1650	Lysogenic	Signal/Provirus
RGVC1651	Lysogenic	Signal
RGVC1652	Lysogenic	Provirus
RGVC1653	Unknown
RGVC1654	Lysogenic	Signal
RGVC1655	Unknown
RGVC1656	Lysogenic	Signal
RGVC1657	Lysogenic	Signal
RGVC1658	Unknown
RGVC1659	Unknown
RGVC1660	Unknown
RGVC1661	Unknown
RGVC1662	Lysogenic	Signal
RGVC1663	Unknown
RGVC1664	Lysogenic	Signal
RGVC1665	Lysogenic	Signal
RGVC1666	Lysogenic	Signal/Provirus
RGVC1667	Unknown
RGVC1668	Lysogenic	Signal/Provirus
RGVC1669	Lysogenic	Signal/Provirus
RGVC1670	Lysogenic	Signal
RGVC1671	Lysogenic	Provirus
RGVC1672	Lysogenic	Signal
RGVC1673	Unknown
RGVC1674	Lysogenic	Signal
RGVC1675	Lysogenic	Signal
RGVC1676	Lysogenic	Signal
RGVC1677	Lysogenic	Provirus
RGVC1678	Lysogenic	Signal
RGVC1679	Lysogenic	Signal
RGVC1680	Lysogenic	Signal
RGVC1681	Unknown
RGVC1682	Lysogenic	Signal/Provirus
RGVC1683	Lysogenic	Signal
RGVC1684	Lysogenic	Provirus
RGVC1685	Lysogenic	Signal
RGVC1686	Unknown
RGVC1687	Unknown
RGVC1688	Lysogenic	Signal
RGVC1689	Lysogenic	Signal
RGVC1690	Lysogenic	Signal
RGVC1691	Unknown
RGVC1692	Lysogenic	Signal
RGVC1693	Lysogenic	Signal/Provirus
RGVC1694	Lysogenic	Signal/Provirus
RGVC1695	Unknown
RGVC1696	Unknown
RGVC1697	Unknown
RGVC1698	Lysogenic	Signal
RGVC1699	Unknown
RGVC1700	Lysogenic	Signal
RGVC1701	Lysogenic	Provirus
RGVC1702	Lysogenic	Signal
RGVC1703	Unknown
RGVC1704	Lysogenic	Signal
RGVC1705	Lysogenic	Signal
RGVC1706	Lysogenic	Signal
RGVC1707	Lysogenic	Signal/Provirus
RGVC1708	Unknown
RGVC1709	Lysogenic	Provirus
RGVC1710	Lysogenic	Signal
RGVC1711	Lysogenic	Signal
RGVC1712	Lysogenic	Signal/Provirus
RGVC1713	Lysogenic	Signal
RGVC1714	Lysogenic	Signal
RGVC1715	Unknown
RGVC1716	Unknown
RGVC1717	Unknown
RGVC1718	Unknown
RGVC1719	Lytic
RGVC1720	Lysogenic	Signal/Provirus
RGVC1721	Lysogenic	Signal
RGVC1722	Lysogenic	Signal/Provirus
RGVC1723	Unknown
RGVC1724	Lysogenic	Signal/Provirus
RGVC1725	Lysogenic	Provirus
RGVC1726	Lysogenic	Signal
RGVC1727	Lysogenic	Signal
RGVC1728	Unknown
RGVC1729	Lysogenic	Signal
RGVC1730	Lysogenic	Signal
RGVC1731	Unknown
RGVC1732	Unknown
RGVC1733	Lysogenic	Signal
RGVC1734	Lysogenic	Signal
RGVC1735	Unknown
RGVC1736	Lysogenic	Signal/Provirus
RGVC1737	Unknown
RGVC1738	Unknown
RGVC1739	Unknown
RGVC1740	Unknown
RGVC1741	Lysogenic	Signal
RGVC1742	Lysogenic	Signal/Provirus
RGVC1743	Lysogenic	Signal/Provirus
RGVC1744	Unknown
RGVC1745	Unknown
RGVC1746	Unknown
RGVC1747	Lysogenic	Signal
RGVC1748	Lysogenic	Signal
RGVC1749	Unknown
RGVC1750	Unknown
RGVC1751	Lysogenic	Signal/Provirus
RGVC1752	Unknown
RGVC1753	Unknown
RGVC1754	Lysogenic	Signal/Provirus
RGVC1755	Unknown
RGVC1756	Lysogenic	Signal
RGVC1757	Unknown
RGVC1758	Lysogenic	Signal/Provirus
RGVC1759	Lysogenic	Signal
RGVC1760	Lysogenic	Provirus
RGVC1761	Unknown
RGVC1762	Lysogenic	Signal
RGVC1763	Lysogenic	Signal
RGVC1764	Lysogenic	Signal
RGVC1765	Unknown
RGVC1766	Unknown
RGVC1767	Lysogenic	Signal
RGVC1768	Unknown
RGVC1769	Lysogenic	Signal/Provirus
RGVC1770	Lysogenic	Signal/Provirus
RGVC1771	Lysogenic	Signal/Provirus
RGVC1772	Lysogenic	Provirus
RGVC1773	Lysogenic	Provirus
RGVC1774	Lysogenic	Signal
RGVC1775	Unknown
RGVC1776	Lysogenic	Signal
RGVC1777	Lysogenic	Signal
RGVC1778	Unknown
RGVC1779	Unknown
RGVC1780	Lysogenic	Signal
RGVC1781	Unknown
RGVC1782	Unknown
RGVC1783	Lysogenic	Signal
RGVC1784	Unknown
RGVC1785	Lysogenic	Signal
RGVC1786	Lysogenic	Provirus
RGVC1787	Unknown
RGVC1788	Unknown
RGVC1789	Lysogenic	Signal
RGVC1790	Unknown
RGVC1791	Lysogenic	Signal
RGVC1792	Lysogenic	Signal/Provirus
RGVC1793	Unknown
RGVC1794	Lysogenic	Signal/Provirus
RGVC1795	Lysogenic	Signal
RGVC1796	Lysogenic	Signal
RGVC1797	Lysogenic	Signal
RGVC1798	Lysogenic	Signal
RGVC1799	Unknown
RGVC1800	Lysogenic	Provirus
RGVC1801	Lysogenic	Signal/Provirus
RGVC1802	Unknown
RGVC1803	Lysogenic	Signal
RGVC1804	Lysogenic	Signal/Provirus
RGVC1805	Unknown
RGVC1806	Unknown
RGVC1807	Unknown
RGVC1808	Unknown
RGVC1809	Lysogenic	Signal/Provirus
RGVC1810	Lysogenic	Signal
RGVC1811	Lysogenic	Signal
RGVC1812	Lysogenic	Signal
RGVC1813	Lysogenic	Signal
RGVC1814	Unknown
RGVC1815	Unknown
RGVC1816	Lysogenic	Signal/Provirus
RGVC1817	Lysogenic	Signal/Provirus
RGVC1818	Lysogenic	Signal
RGVC1819	Lysogenic	Signal/Provirus
RGVC1820	Lysogenic	Signal
RGVC1821	Lysogenic	Signal
RGVC1822	Lysogenic	Signal
RGVC1823	Lysogenic	Signal
RGVC1824	Lysogenic	Signal/Provirus
RGVC1825	Unknown
RGVC1826	Lysogenic	Signal
RGVC1827	Unknown
RGVC1828	Lysogenic	Signal
RGVC1829	Lysogenic	Signal
RGVC1830	Lysogenic	Signal
RGVC1831	Lysogenic	Signal/Provirus
RGVC1832	Unknown
RGVC1833	Lysogenic	Signal
RGVC1834	Lysogenic	Provirus
RGVC1835	Unknown
RGVC1836	Lysogenic	Signal/Provirus
RGVC1837	Lysogenic	Signal
RGVC1838	Lysogenic	Signal
RGVC1839	Lysogenic	Signal
RGVC1840	Unknown
RGVC1841	Unknown
RGVC1842	Lysogenic	Signal
RGVC1843	Lysogenic	Signal/Provirus
RGVC1844	Unknown
RGVC1845	Unknown
RGVC1846	Lysogenic	Signal
RGVC1847	Lysogenic	Signal
RGVC1848	Unknown
RGVC1849	Lysogenic	Signal/Provirus
RGVC1850	Lysogenic	Signal
RGVC1851	Lysogenic	Provirus
RGVC1852	Lysogenic	Signal
RGVC1853	Lysogenic	Signal/Provirus
RGVC1854	Lysogenic	Signal
RGVC1855	Lysogenic	Signal
RGVC1856	Lysogenic	Signal
RGVC1857	Lysogenic	Signal
RGVC1858	Unknown
RGVC1859	Lysogenic	Signal
RGVC1860	Unknown
RGVC1861	Unknown
RGVC1862	Lysogenic	Signal
RGVC1863	Unknown
RGVC1864	Unknown
RGVC1865	Lysogenic	Signal
RGVC1866	Lysogenic	Signal
RGVC1867	Unknown
RGVC1868	Unknown
RGVC1869	Unknown
RGVC1870	Lysogenic	Signal
RGVC1871	Lysogenic	Signal
RGVC1872	Unknown
RGVC1873	Lysogenic	Signal
RGVC1874	Lysogenic	Signal
RGVC1875	Lysogenic	Signal
RGVC1876	Unknown
RGVC1877	Unknown
RGVC1878	Lysogenic	Signal
RGVC1879	Lysogenic	Signal
RGVC1880	Unknown
RGVC1881	Unknown
RGVC1882	Unknown
RGVC1883	Unknown
RGVC1884	Lysogenic	Provirus
RGVC1885	Lysogenic	Signal
RGVC1886	Unknown
RGVC1887	Unknown
RGVC1888	Lysogenic	Signal
RGVC1889	Lysogenic	Signal
RGVC1890	Lysogenic	Signal
RGVC1891	Unknown
RGVC1892	Unknown
RGVC1893	Lysogenic	Signal
RGVC1894	Lysogenic	Signal
RGVC1895	Unknown
RGVC1896	Lysogenic	Signal/Provirus
RGVC1897	Unknown
RGVC1898	Unknown
RGVC1899	Lysogenic	Signal
RGVC1900	Lysogenic	Signal/Provirus
RGVC1901	Lysogenic	Provirus
RGVC1902	Lysogenic	Provirus
RGVC1903	Lysogenic	Signal
RGVC1904	Lysogenic	Provirus
RGVC1905	Lysogenic	Signal
RGVC1906	Lysogenic	Signal/Provirus
RGVC1907	Lysogenic	Signal
RGVC1908	Unknown
RGVC1909	Unknown
RGVC1910	Unknown
RGVC1911	Lysogenic	Provirus
RGVC1912	Unknown
RGVC1913	Unknown
RGVC1914	Lysogenic	Signal
RGVC1915	Lysogenic	Signal
RGVC1916	Lysogenic	Signal
RGVC1917	Lysogenic	Provirus
RGVC1918	Unknown
RGVC1919	Lysogenic	Signal
RGVC1920	Unknown
RGVC1921	Lysogenic	Signal/Provirus
RGVC1922	Lysogenic	Signal/Provirus
RGVC1923	Lysogenic	Signal
RGVC1924	Lysogenic	Signal
RGVC1925	Unknown
RGVC1926	Unknown
RGVC1927	Lysogenic	Signal
RGVC1928	Unknown
RGVC1929	Lysogenic	Signal/Provirus
RGVC1930	Lysogenic	Signal
RGVC1931	Unknown
RGVC1932	Lysogenic	Signal/Provirus
RGVC1933	Unknown
RGVC1934	Unknown
RGVC1935	Lysogenic	Signal
RGVC1936	Unknown
RGVC1937	Unknown
RGVC1938	Lysogenic	Signal
RGVC1939	Lysogenic	Signal
RGVC1940	Unknown
RGVC1941	Lysogenic	Signal
RGVC1942	Lysogenic	Signal
RGVC1943	Unknown
RGVC1944	Lysogenic	Signal
RGVC1945	Unknown
RGVC1946	Unknown
RGVC1947	Lysogenic	Signal/Provirus
RGVC1948	Lysogenic	Provirus
RGVC1949	Lysogenic	Signal/Provirus
RGVC1950	Lysogenic	Signal
RGVC1951	Lysogenic	Signal/Provirus
RGVC1952	Unknown
RGVC1953	Unknown
RGVC1954	Lytic
RGVC1955	Lysogenic	Signal
RGVC1956	Unknown
RGVC1957	Lysogenic	Signal/Provirus
RGVC1958	Lysogenic	Signal
RGVC1959	Lysogenic	Signal
RGVC1960	Unknown
RGVC1961	Lysogenic	Signal
RGVC1962	Lysogenic	Signal/Provirus
RGVC1963	Lysogenic	Signal
RGVC1964	Unknown
RGVC1965	Lysogenic	Signal/Provirus
RGVC1966	Unknown
RGVC1967	Unknown
RGVC1968	Lysogenic	Signal
RGVC1969	Unknown
RGVC1970	Unknown
RGVC1971	Lysogenic	Signal/Provirus
RGVC1972	Lysogenic	Provirus
RGVC1973	Lysogenic	Signal
RGVC1974	Lysogenic	Signal
RGVC1975	Lysogenic	Signal/Provirus
RGVC1976	Lysogenic	Signal
RGVC1977	Unknown
RGVC1978	Lysogenic	Signal/Provirus
RGVC1979	Lysogenic	Signal
RGVC1980	Unknown
RGVC1981	Unknown
RGVC1982	Unknown
RGVC1983	Lysogenic	Signal
RGVC1984	Unknown
RGVC1985	Lysogenic	Signal
RGVC1986	Lysogenic	Signal
RGVC1987	Lysogenic	Provirus
RGVC1988	Lysogenic	Signal
RGVC1989	Lysogenic	Signal/Provirus
RGVC1990	Lysogenic	Signal/Provirus
RGVC1991	Unknown
RGVC1992	Lysogenic	Signal
RGVC1993	Unknown
RGVC1994	Lysogenic	Signal
RGVC1995	Unknown
RGVC1996	Unknown
RGVC1997	Lysogenic	Signal/Provirus
RGVC1998	Lysogenic	Signal
[truncated: 41,983 more rows]

## Sheet: Table S20
Table S20: List of lysogenic signal genes
Pfam	Name	Virus Num	Gene num	Type
PF00589	Phage integrase family	11613	14056	Integrase
PF00239	Resolvase, N terminal domain	5133	6702	Resolvase
PF09588	YqaJ-like viral recombinase domain	1343	1396	Recombinase
PF07508	Recombinase	1134	1342	Recombinase
PF13102	Phage integrase SAM-like domain	826	863	Integrase
PF00665	Integrase core domain	621	787	Integrase
PF07282	Putative transposase DNA-binding domain	524	798	Transposase
PF01385	Probable transposase	373	504	Transposase
PF01797	Transposase IS200 like	262	320	Transposase
PF01548	Transposase	230	264	Transposase
PF14659	Phage integrase, N-terminal SAM-like domain	215	228	Integrase
PF09035	Excisionase from transposon Tn916	200	220	Excisionase
PF01609	Transposase DDE domain	185	236	Transposase
PF00872	Transposase, Mutator family	173	312	Transposase
PF01610	Transposase	155	220	Transposase
PF13751	Transposase DDE domain	127	155	Transposase
PF13408	Recombinase zinc beta ribbon domain	125	129	Recombinase
PF03050	Transposase IS66 family	112	143	Transposase
PF12762	ISXO2-like transposase domain	102	114	Transposase
PF02371	Transposase IS116/IS110/IS902 family	92	99	Transposase
PF13022	Helix-turn-helix of insertion element transposase	78	85	Transposase
PF05598	Transposase domain (DUF772)	73	92	Transposase
PF12784	PD-(D/E)XK nuclease family transposase	67	72	Transposase
PF01527	Transposase	64	75	Transposase
PF13495	Phage integrase, N-terminal SAM-like domain	44	45	Integrase
PF13358	DDE superfamily endonuclease	38	44	Others
PF13701	Transposase DDE domain group 1	34	40	Transposase
PF09299	Mu transposase, C-terminal	30	30	Transposase
PF04986	Putative transposase	28	30	Transposase
PF02920	DNA binding domain of tn916 integrase	25	26	Integrase
PF02899	Phage integrase, N-terminal SAM-like domain	24	25	Integrase
PF13586	Transposase DDE domain	24	32	Transposase
PF13683	Integrase core domain	23	27	Integrase
PF13340	Putative transposase of IS4/5 family (DUF4096)	20	24	Transposase
PF13333	Integrase core domain	15	15	Integrase
PF13808	DDE_Tnp_1-associated	15	16	Others
PF13610	DDE domain	14	15	Others
PF02914	Bacteriophage Mu transposase	13	13	Transposase
PF07592	Rhodopirellula transposase DDE domain	12	15	Transposase
PF03400	IS1 transposase	9	13	Transposase
PF13612	Transposase DDE domain	9	10	Transposase
PF14690	zinc-finger of transposase IS204/IS1001/IS1096/IS1165	4	4	Transposase
PF12760	Transposase zinc-ribbon domain	3	3	Transposase
PF13005	zinc-finger binding domain of transposase IS66	3	3	Transposase
PF13542	Helix-turn-helix domain of transposase family ISL3	3	3	Transposase
PF12834	Phage integrase, N-terminal	2	2	Integrase
PF13359	DDE superfamily endonuclease	2	2	Others

## Sheet: Table S21
Table S21.Comparing lysogenic virus ratios among host classes and regions
Total RPKM	Rum	Ret	Oma	Abo	Duo	Jej	Ile	Cec	Col	Rec
Alphaproteobacteria	42.3061	41.7901	35.876	39.0436	43.4142	50.3793	61.0443	31.4746	30.477	34.7432
Bacilli	79.4952	76.2939	74.3969	51.9094	97.1042	136.329	124.45	64.2492	67.8954	73.1957
Bacteroidia	1943.01	1947.71	1996	1850.33	872.781	760.013	969.353	1046.92	1050.1	1039.77
Clostridia	427.874	391.592	515.178	430.783	545.506	477.248	531.284	1121.99	1071.28	1096.45
Kiritimatiellae	26.7359	24.4374	20.7738	28.1149	50.3721	43.6711	40.5194	14.4984	26.1331	30.3625
Negativicutes	68.1605	86.6358	55.8047	27.9573	50.137	19.4965	11.0713	10.9809	10.9552	11.3978
Saccharimonadia	18.0665	16.561	22.9587	10.7211	58.2808	208.277	188.317	11.6446	10.9268	10.7269
Spirochaetia	21.716	20.9317	26.4296	16.2176	15.8906	15.6132	14.7239	48.8465	47.7555	51.2328
Synergistia	32.578	27.5572	9.26017	16.3074	14.3477	2.49105	1.63387	0.121633	0.11709	0.104544
Methanobacteria	11.0112	12.8264	11.0783	9.65188	41.142	59.7778	64.7722	12.4157	16.9258	14.4986
Methanomicrobia	0.0287863	0.0126339	0.0103043	0.0176189	0.117653	0.185727	1.15775	3.81107	3.91114	2.43936
Thermoplasmata	2.8264	2.29405	4.07353	3.65563	1.1671	0.0957197	0.208121	0.422908	0.329888	0.254408
Others	234.56	252.775	240.306	185.397	300.596	348.448	304.047	363.882	349.673	367.658
Lysogenic RPKM	Rum	Ret	Oma	Abo	Duo	Jej	Ile	Cec	Col	Rec
Alphaproteobacteria	34.3954	34.9898	28.6399	32.8178	41.1326	49.4669	58.9629	29.9046	28.4594	33.3717
Bacilli	60.2856	57.1303	48.7015	42.3789	73.8049	90.8878	81.716	47.0548	49.2396	53.7116
Bacteroidia	1255.91	1260.28	1271.2	1210.16	644.077	705.586	886.646	765.437	774.323	774.895
Clostridia	325.807	302.62	382.305	336.404	441.79	412.47	436.769	876.383	838.506	847.618
Kiritimatiellae	24.6999	22.484	17.9064	26.1334	46.2234	39.3424	37.2566	12.6759	14.231	10.7089
Negativicutes	30.7873	25.2621	22.6431	17.6472	28.2721	18.0049	9.89435	10.4454	9.66567	10.7303
Saccharimonadia	16.1089	14.5774	19.4394	9.18989	54.1692	198.338	178.381	11.2533	10.5778	10.2374
Spirochaetia	17.12	16.6227	22.0226	13.232	14.5449	15.0525	14.0847	38.0123	35.8317	39.3742
Synergistia	15.8591	14.5533	4.51399	8.33861	7.09172	1.25571	0.811055	0.0527324	0.0560924	0.053581
Methanobacteria	7.63904	9.34778	7.7966	8.42414	29.9796	43.9471	44.8909	9.14072	13.1709	10.8623
Methanomicrobia	0.0142738	0.0102774	0.00840717	0.0112375	0.0917353	0.175721	1.01343	0.532267	0.537882	0.424948
Thermoplasmata	0.556484	0.380443	0.452213	0.464926	0.113462	0.0508539	0.0537667	0.288361	0.312544	0.241773
Others	167.799	163.825	168.799	149.163	231.596	313.697	279.929	307.263	291.852	304.683
Lysogenic ratio (%)	Rum	Ret	Oma	Abo	Duo	Jej	Ile	Cec	Col	Rec
Alphaproteobacteria	0.813013	0.837274	0.798303	0.840542	0.947446	0.981889	0.965902	0.950118	0.933801	0.960525
Bacilli	0.758355	0.748818	0.654618	0.816401	0.760059	0.666681	0.656618	0.73238	0.725227	0.733808
Bacteroidia	0.646371	0.647053	0.636877	0.654027	0.73796	0.928387	0.914678	0.731135	0.737378	0.745257
Clostridia	0.761457	0.772793	0.742083	0.780914	0.809873	0.864267	0.822101	0.781098	0.782717	0.77306
Kiritimatiellae	0.923845	0.920066	0.861968	0.929523	0.91764	0.90088	0.919476	0.874291	0.544559	0.352703
Negativicutes	0.451689	0.291589	0.405755	0.631218	0.563896	0.923496	0.893694	0.951225	0.882291	0.941433
Saccharimonadia	0.891647	0.880229	0.846714	0.857175	0.929452	0.952279	0.947237	0.966403	0.968061	0.954368
Spirochaetia	0.788358	0.794141	0.833256	0.8159	0.91531	0.964089	0.956588	0.778198	0.750315	0.768535
Synergistia	0.486803	0.528112	0.487463	0.51134	0.494276	0.504088	0.496401	0.433536	0.479056	0.512521
Methanobacteria	0.693755	0.72879	0.70377	0.872798	0.728686	0.735175	0.693057	0.73622	0.778152	0.749194
Methanomicrobia	0.495855	0.813478	0.815892	0.637808	0.77971	0.946126	0.875343	0.139663	0.137526	0.174205
Thermoplasmata	0.196888	0.165839	0.111013	0.127181	0.0972165	0.53128	0.258343	0.681853	0.947423	0.950336
Others	0.71538	0.648105	0.702434	0.804556	0.770457	0.900268	0.920677	0.844404	0.834643	0.828713
PS: Rum, rumen; Ret, reticulum; Oma, omasum; Abo, abomasum; Duo, duodenum; Jej, jejunum; Ile, ileum; Cec, cecum; Col, colon; Rec, rectum.
